# Supplementary material for: Time-resolved phosphoproteomics reveals scaffolding and catalysis-responsive patterns of SHP2-dependent signaling
Source: eLife journal article supplement (doi:10.7554/elife.64251), 2021-03-23
Supplement: supp [file elife-64251-supp-v1.zip]

Archive with 48 entries (48 files):
- elife_poa_e64251_Figure_1_figure_supplement_1.pdf
- elife_poa_e64251_Figure_1_figure_supplement_2.pdf
- elife_poa_e64251_Figure_1_figure_supplement_3.pdf
- elife_poa_e64251_Figure_2_figure_supplement_1.pdf
- elife_poa_e64251_Figure_2_figure_supplement_1_source_data_1.pdf
- elife_poa_e64251_Figure_2_figure_supplement_1_source_data_2.pdf
- elife_poa_e64251_Figure_2_figure_supplement_1_source_data_3.pdf
- elife_poa_e64251_Figure_2_figure_supplement_1_source_data_4.pdf
- elife_poa_e64251_Figure_2_figure_supplement_1_source_data_5.pdf
- elife_poa_e64251_Figure_2_figure_supplement_1_source_data_6.pdf
- elife_poa_e64251_Figure_2_figure_supplement_1_source_data_7.csv
- elife_poa_e64251_Figure_2_figure_supplement_1_source_data_8.csv
- elife_poa_e64251_Figure_2_figure_supplement_1_source_data_9.csv
- elife_poa_e64251_Figure_2_figure_supplement_1_source_data_10.csv
- elife_poa_e64251_Figure_2_figure_supplement_1_source_data_11.csv
- elife_poa_e64251_Figure_2_figure_supplement_1_source_data_12.csv
- elife_poa_e64251_Figure_2_figure_supplement_2.pdf
- elife_poa_e64251_Figure_3_figure_supplement_1.pdf
- elife_poa_e64251_Figure_4_figure_supplement_1.pdf
- elife_poa_e64251_Figure_5_figure_supplement_1.pdf
- elife_poa_e64251_Figure_5_figure_supplement_2.pdf
- elife_poa_e64251_Figure_5_figure_supplement_3.pdf
- elife_poa_e64251_Figure_7_figure_supplement_1.pdf
- elife_poa_e64251_Supplementary_file_1.xlsx
- elife_poa_e64251_Supplementary_file_2.xlsx
- elife_poa_e64251_Supplementary_file_3.xlsx
- elife_poa_e64251_Transparent_Reporting_File.docx
- elife_poa_e64251_Figure_1_source_data_1.xlsx
- elife_poa_e64251_Figure_1_figure_supplement_1_source_data_1.xlsx
- elife_poa_e64251_Figure_1_figure_supplement_1_source_data_2.xlsx
- elife_poa_e64251_Figure_1_figure_supplement_1_source_data_3.xlsx
- elife_poa_e64251_Figure2_source_data_1.xlsx
- elife_poa_e64251_Figure_2_source_data_2.xlsx
- elife_poa_e64251_Figure_2_source_data_3.xlsx
- elife_poa_e64251_Figure_2_figure_supplement_2_source_data_1.xlsx
- elife_poa_e64251_Figure_2_figure_supplement_2_source_data_2.xlsx
- elife_poa_e64251_Figure_2_figure_supplement_2_source_data_3.xlsx
- elife_poa_e64251_Figure_3_source_data_1.xlsx
- elife_poa_e64251_Figure_3_source_data_2.xlsx
- elife_poa_e64251_Figure_3_figure_supplement_1_source_data_1.xlsx
- elife_poa_e64251_Figure_3_figure_supplement_1_source_data_2.xlsx
- elife_poa_e64251_Figure_3_figure_supplement_1_source_data_3.xlsx
- elife_poa_e64251_Figure_4_source_data_1.xlsx
- elife_poa_e64251_Figure_4_source_data_2.xlsx
- elife_poa_e64251_Figure_5_figure_supplement_1_source_data_1.xlsx
- elife_poa_e64251_Figure_5_figure_supplement_1_source_data_2.xlsx
- elife_poa_e64251_Figure_5_figure_supplement_1_source_data_3.xlsx
- elife_poa_e64251_Figure_7_figure_supplement_1_source_data_1.xlsx
