# Supplementary material for: Time-resolved phosphoproteomics reveals scaffolding and catalysis-responsive patterns of SHP2-dependent signaling
Source: eLife journal article supplement (doi:10.7554/elife.64251), 2021-03-23
Supplement: supp [file elife-64251-supp-v1.zip › elife_poa_e64251_Figure2_source_data_1.xlsx]

## Sheet: Sheet1
Sample	STX4_pY251_normalized TMT signal
DMSO_EGF_0	2.25636
DMSO_EGF_5	5.82085
DMSO_EGF_10	6.44552
DMSO_EGF_30	7.78165
SHP099_EGF_0	3.63193
SHP099_EGF_5	13.7107
SHP099_EGF_10	19.1555
SHP099_EGF_30	15.8287
WO_EGF_5	8.65482
WO_EGF_10	8.81209
WO_EGF_30	7.90182
