# Supplementary material for: Time-resolved phosphoproteomics reveals scaffolding and catalysis-responsive patterns of SHP2-dependent signaling
Source: eLife journal article supplement (doi:10.7554/elife.64251), 2021-03-23
Supplement: supp [file elife-64251-supp-v1.zip › elife_poa_e64251_Figure_1_figure_supplement_1_source_data_1.xlsx]

## Sheet: Sheet1
Sample	pERK/tERK rep1_AUC	pERK/tERK rep2_AUC	Mean	Standard deviation	Standard error of the mean
DMSO_EGF_0	0.0363162	0.0963162	0.0663162	0.0424264	0.03
DMSO_EGF_2	1.06537	0.995369	1.03037	0.0494975	0.035
DMSO_EGF_5	1.24045	1.33045	1.28545	0.0636396	0.045
DMSO_EGF_10	1.20853	1.26853	1.23853	0.0424264	0.03
DMSO_EGF_30	0.734921	0.784921	0.759921	0.0353553	0.025
DMSO_EGF_120	0.560631	0.526631	0.543631	0.0240416	0.017
DMSO_EGF_240	0.416148	0.426148	0.421148	0.00707107	0.005
SHP099_EGF_0	0.00406653	0.00706653	0.00556653	0.00212132	0.0015
SHP099_EGF_2	0.00326687	0.00326687	0.00326687	0	0
SHP099_EGF_5	0.544061	0.644061	0.594061	0.0707107	0.05
SHP099_EGF_10	0.0392519	0.0342519	0.0367519	0.00353553	0.0025
SHP099_EGF_30	0.0970314	0.0890314	0.0930314	0.00565685	0.004
SHP099_EGF_120	0.0749894	0.0837494	0.0793694	0.00619426	0.00438
SHP099_EGF_240	0.0903508	0.0253508	0.0578508	0.0459619	0.0325
