# Supplementary material for: Time-resolved phosphoproteomics reveals scaffolding and catalysis-responsive patterns of SHP2-dependent signaling
Source: eLife journal article supplement (doi:10.7554/elife.64251), 2021-03-23
Supplement: supp [file elife-64251-supp-v1.zip › elife_poa_e64251_Figure_1_figure_supplement_1_source_data_2.xlsx]

## Sheet: Sheet1
Mass	Group	TMT relative abundance for ERK1_pY204
126.128	DMSO+EGF 0'	24.2638
127.125	DMSO+EGF 5'	84.3484
127.2	DMSO+EGF 10'	55.7887
128.128	DMSO+EGF 30'	44.0458
128.198	SHP099+EGF 0'	5.3562
129.131	SHP099+EGF 5'	32.9362
129.202	SHP099+EGF 10'	27.2637
130.141	SHP099+EGF 30'	41.6523
130.211	Washout+EGF 5'	66.609
131.138	Washout+EGF 10'	109.055
131.208	Washout+EGF 30'	91.1836
