# Supplementary material for: Time-resolved phosphoproteomics reveals scaffolding and catalysis-responsive patterns of SHP2-dependent signaling
Source: eLife journal article supplement (doi:10.7554/elife.64251), 2021-03-23
Supplement: supp [file elife-64251-supp-v1.zip › elife_poa_e64251_Figure_1_figure_supplement_1_source_data_3.xlsx]

## Sheet: Sheet1
Mass	Group	TMT relative abundance
126.128	DMSO+EGF 0'	1.87449
127.125	DMSO+EGF 5'	7.43246
127.195	DMSO+EGF 10'	3.2658
128.128	DMSO+EGF 30'	33.768
128.198	SHP099+EGF 0'	0.903175
129.132	SHP099+EGF 5'	20.2766
129.202	SHP099+EGF 10'	63.8658
130.135	SHP099+EGF 30'	167.042
130.205	Washout+EGF 5'	31.1415
131.138	Washout+EGF 10'	34.1136
131.208	Washout+EGF 30'	68.0798
