# Supplementary material for: Time-resolved phosphoproteomics reveals scaffolding and catalysis-responsive patterns of SHP2-dependent signaling
Source: eLife journal article supplement (doi:10.7554/elife.64251), 2021-03-23
Supplement: supp [file elife-64251-supp-v1.zip › elife_poa_e64251_Figure_1_source_data_1.xlsx]

## Sheet: Sheet1
Sample	pERK/tERK rep1_AUC	pERK/tERK rep2_AUC	Mean	Standard deviation	Standard error of the mean
DMSO_EGF_0	0.00155915	0.00242288	0.00199102	0.00061075	0.000431865
DMSO_EGF_5	1.31517	1.25059	1.28288	0.0456666	0.0322911
DMSO_EGF_10	0.661044	0.659894	0.660469	0.000812713	0.000574675
DMSO_EGF_30	0.353375	0.344227	0.348801	0.00646833	0.0045738
SHP099_EGF_0	0.00192088	0.00108595	0.00150342	0.00059038	0.000417462
SHP099_EGF_5	0.141923	0.197025	0.169474	0.0389627	0.0275508
SHP099_EGF_10	0.00674572	0.00446285	0.00560429	0.00161423	0.00114144
SHP099_EGF_30	0.00859775	0.00596281	0.00728028	0.00186318	0.00131747
WO_EGF_5	1.13196	1.19068	1.16132	0.0415273	0.0293643
WO_EGF_10	0.634197	0.632722	0.633459	0.00104299	0.000737506
WO_EGF_30	0.632026	0.688789	0.660407	0.0401379	0.0283818
