# Supplementary material for: Time-resolved phosphoproteomics reveals scaffolding and catalysis-responsive patterns of SHP2-dependent signaling
Source: eLife journal article supplement (doi:10.7554/elife.64251), 2021-03-23
Supplement: supp [file elife-64251-supp-v1.zip › elife_poa_e64251_Figure_2_figure_supplement_1_source_data_7.csv]

41\_Y660
AFAD\_Y1229
AFAD\_Y1496
AHNK\_Y5089
AHNK\_Y5836
AHNK\_Y836
AHNK\_Y964
AHNK2\_Y4795
ANK3\_Y883
ANO1\_Y7
ARHG5\_Y1100
ARHG5\_Y1140
ARHG5\_Y656
ARVC\_Y259
C9J6P4\_Y410
CAV1\_Y6
CBLB\_Y709
CBLB\_Y763
CCD50\_Y455
CDV3\_Y190
CDV3\_Y244
CDV3\_Y95
CF132\_Y1142
CK052\_Y103
COF1\_Y68
CRKL\_Y207
CSRP1\_Y71
CTND1\_Y174
CTND1\_Y193
CTND1\_Y228
CTND1\_Y241
CTND1\_Y257
CTND1\_Y904
DAPP1\_Y139
DBNL\_Y162
DDX17\_Y580
E41L1\_Y68
E41L1\_Y796
E41L1\_Y864
E41L2\_Y623
E41L2\_Y88
EGFR\_Y1069
EGFR\_Y1092
EGFR\_Y1138
EGFR\_Y1197
EMD\_Y94
EPN2\_Y186
EPN4\_Y293
FUBP1\_Y58
FUBP1\_Y60
FUS\_Y468
GAB1\_Y259
GAB1\_Y689
GAB2\_Y409
GAB2\_Y614
GAB2\_Y643
GAREM\_Y596
HBS1L\_Y58
HGS\_Y524
HNRPL\_Y92
HNRPM\_Y64
ITSN2\_Y968
K1522\_Y300
KIF23\_Y769
KSYK\_Y323
LAP2\_Y1164
LASP1\_Y186
LPHN2\_Y1448
LSR\_Y407
LSR\_Y535
LYN\_Y194
M4K3\_Y366
MALD2\_Y137
MALD2\_Y23
MAPK3\_Y207
MCFD2\_Y135
MK01\_Y187
MK03\_Y204
MPZL1\_Y241
MPZL1\_Y263
MYO6\_Y1146
MYO6\_Y1182
NCK2\_Y99
NOSIP\_Y14
NRP1\_Y920
NSF1C\_Y169
OCLN\_Y315
OCLN\_Y337
OCLN\_Y368
OTUD4\_Y438
PARD3\_Y489
PCDH1\_Y1020
PEAK1\_Y635
PKP2\_Y166
PKP3\_Y195
PKP4\_Y114
PKP4\_Y1156
PKP4\_Y1168
PKP4\_Y482
PLCG1\_Y1254
PLCG1\_Y771
PLCG2\_Y753
PLEC\_Y4611
PTN11\_Y546
PTN11\_Y584
PTN6\_Y566
PTRF\_Y156
Q5JVM0\_Y103
RAB1A\_Y112
RASA1\_Y460
RBM3\_Y155
RBMX\_Y206
RCN2\_Y311
RENT1\_Y1118
RHG32\_Y621
RIPK1\_Y384
ROA2\_Y262
S12A2\_Y956
SAHH2\_Y28
SCAM1\_Y73
SPAT2\_Y433
SPRE2\_Y251
SRC8\_Y154
SRC8\_Y297
SSBP\_Y73
STAM2\_Y192
STAM2\_Y371
STAM2\_Y374
T106B\_Y50
TAGL2\_Y8
TBA1B\_Y282
TBA1C\_Y282
TBCB\_Y98
TENS1\_Y1326
TENS3\_Y780
TM134\_Y57
TOP1\_Y125
TRI29\_Y93
TRIPC\_Y859
UBP24\_Y101
Var1
WDR13\_Y117
WDR13\_Y128
WDR70\_Y618
XCT\_Y15
YBOX1\_Y208
ZMIZ2\_Y103
ZO1\_Y1066
ZO2\_Y1038
