# Supplementary material for: Time-resolved phosphoproteomics reveals scaffolding and catalysis-responsive patterns of SHP2-dependent signaling
Source: eLife journal article supplement (doi:10.7554/elife.64251), 2021-03-23
Supplement: supp [file elife-64251-supp-v1.zip › elife_poa_e64251_Figure_2_figure_supplement_1_source_data_8.csv]

A4\_Y757
A4\_Y762
ABL2\_Y568
ACM3\_Y365
ADAM9\_Y769
AF1L2\_Y411
APLP2\_Y750
ARAP2\_Y77
AT1A1\_Y684
CAPR1\_Y670
CDCP1\_Y806
CEBPB\_Y139
CF132\_Y1067
CPSF7\_Y494
DDR1\_Y520
DDX3X\_Y266
EGFR\_Y869
EPHA4\_Y779
EPHA5\_Y833
FAK1\_Y576
FAK1\_Y861
FER\_Y402
FRK\_Y387
HIPK3\_Y359
HNRH2\_Y266
INADL\_Y938
INAR1\_Y527
JAK2\_Y570
KIRR1\_Y638
KPCD\_Y334
MCP\_Y384
MK11\_Y182
MK12\_Y185
MK13\_Y182
MK14\_Y182
MPP5\_Y243
MRCKB\_Y1638
MUC1\_Y1252
OTU6B\_Y272
PAR3L\_Y1000
PARD3\_Y1080
PAXI\_Y118
PAXI\_Y88
PDZ1I\_Y83
PDZ1I\_Y99
PEAK1\_Y1107
PHAG1\_Y341
PHAG1\_Y359
PKHA6\_Y492
PKP4\_Y415
PKP4\_Y478
PLCG2\_Y1217
PVRL2\_Y513
RFIP5\_Y344
RHG35\_Y1058
RPB7\_Y17
SC16A\_Y1031
SHAN2\_Y34
SRC\_Y222
SRC8\_Y384
SRC8\_Y409
TBA1B\_Y272
TENS1\_Y366
TM192\_Y213
TYK2\_Y292
Var1
YES\_Y426
