# Supplementary material for: Time-resolved phosphoproteomics reveals scaffolding and catalysis-responsive patterns of SHP2-dependent signaling
Source: eLife journal article supplement (doi:10.7554/elife.64251), 2021-03-23
Supplement: supp [file elife-64251-supp-v1.zip › elife_poa_e64251_Figure_2_figure_supplement_1_source_data_9.csv]

ACTB\_Y198
ACTN4\_Y212
ANR39\_Y65
ANXA2\_Y256
ANXA2\_Y48
AP2B1\_Y328
BAIP2\_Y164
C9J6P4\_Y77
CALM\_Y100
CAPR1\_Y78
CBL\_Y141
CC132\_Y571
CKS2\_Y17
COF1\_Y140
CSK\_Y18
DDX6\_Y473
DLG1\_Y782
DLG3\_Y673
DLG5\_Y429
DNJB1\_Y176
DYL1\_Y65
EAA1\_Y523
EHD1\_Y453
EIF1\_Y30
EIF1\_Y79
EPN1\_Y128
EPN2\_Y17
EPN2\_Y17
ES8L1\_Y526
EXOC4\_Y247
FBP1L\_Y566
FLNA\_Y1308
GNAI3\_Y61
HGS\_Y132
HGS\_Y216
HGS\_Y289
HNRPK\_Y114
ICK\_Y159
IMA7\_Y474
IQGA1\_Y1526
ITSN2\_Y553
KC1A\_Y322
KIF23\_Y582
KIF23\_Y582
MALD2\_Y469
MILK1\_Y760
MK07\_Y221
MPP7\_Y417
NADL2\_Y106
OCLN\_Y420
OCLN\_Y443
OSBP1\_Y764
OTUB1\_Y68
P55G\_Y184
P85A\_Y452
P85A\_Y470
P85B\_Y460
P85B\_Y464
P85B\_Y467
PAK2\_Y453
PIN1\_Y23
PLCG2\_Y818
PLXB2\_Y1621
PRDX6\_Y89
PSMD9\_Y41
PTN9\_Y333
PTRF\_Y308
RAB10\_Y6
RABE2\_Y133
RABX5\_Y673
RAPH1\_Y366
REN3B\_Y117
RHG35\_Y1105
ROA2\_Y131
ROA3\_Y145
S10AB\_Y32
S12A2\_Y275
S61A1\_Y276
S61A1\_Y279
SDCB1\_Y46
SEPT9\_Y278
SF3B4\_Y16
SND1\_Y329
SPD2B\_Y226
SPTB2\_Y2249
SPTN1\_Y1020
SPTN1\_Y1073
SPTN2\_Y2289
STAM2\_Y291
TEC\_Y228
TLN1\_Y127
TWF2\_Y309
UBC\_Y59
UBP24\_Y2024
Var1
VAV2\_Y442
VIGLN\_Y437
VTI1B\_Y68
ZCCHV\_Y77
ZO2\_Y292
