# Supplementary material for: Time-resolved phosphoproteomics reveals scaffolding and catalysis-responsive patterns of SHP2-dependent signaling
Source: eLife journal article supplement (doi:10.7554/elife.64251), 2021-03-23
Supplement: supp [file elife-64251-supp-v1.zip › elife_poa_e64251_Figure_2_figure_supplement_1_source_data_10.csv]

ACK1\_Y938
AHNK\_Y61
ANXA2\_Y42
ANXA4\_Y165
CIP4\_Y590
CRK\_Y136
CSKI2\_Y336
CTND1\_Y600
DSC2\_Y853
ERRFI\_Y394
EVI5\_Y692
GAB2\_Y476
GRB2\_Y209
IQGA1\_Y1114
KCY\_Y49
LIPB2\_Y422
MILK1\_Y744
P85B\_Y453
PACN3\_Y418
PEBP1\_Y181
PHAR2\_Y590
RAB35\_Y5
RETST\_Y486
RGPS2\_Y278
SI1L3\_Y1411
SNP29\_Y189
SNTA1\_Y175
SPD2B\_Y855
STA5A\_Y694
STAP2\_Y250
STAT3\_Y539
STAT3\_Y704
STAT3\_Y705
STAT6\_Y641
STX4\_Y115
STX4\_Y251
TM1L2\_Y404
UBP43\_Y835
Var1
