# Supplementary material for: Time-resolved phosphoproteomics reveals scaffolding and catalysis-responsive patterns of SHP2-dependent signaling
Source: eLife journal article supplement (doi:10.7554/elife.64251), 2021-03-23
Supplement: supp [file elife-64251-supp-v1.zip › elife_poa_e64251_Figure_2_figure_supplement_1_source_data_11.csv]

Var1
AAAT\_Y524
ANXA1\_Y39
CSK\_Y64
CTNB1\_Y142
