# Supplementary material for: Time-resolved phosphoproteomics reveals scaffolding and catalysis-responsive patterns of SHP2-dependent signaling
Source: eLife journal article supplement (doi:10.7554/elife.64251), 2021-03-23
Supplement: supp [file elife-64251-supp-v1.zip › elife_poa_e64251_Figure_2_figure_supplement_1_source_data_12.csv]

ACTN4\_Y265
ADT2\_Y191
ADT3\_Y81
AKAP2\_Y915
AMOL1\_Y691
BCS1\_Y181
CAP1\_Y31
CEP55\_Y284
CH60\_Y227
CLH1\_Y1096
CRK\_Y108
CTNB1\_Y489
CYC\_Y98
EFNB1\_Y313_Y317
EPHB4\_Y614
EPIPL\_Y1331
ERBB3\_Y1307
ERBB3\_Y1328
ERP29\_Y66
FRK\_Y46
HACD3\_Y316
ICAL\_Y288
LMNB1\_Y138
LR16A\_Y1339
MPRIP\_Y450
MYO1D\_Y435
NCK1\_Y105
OCRL\_Y133
P85A\_Y467
PEAK1\_Y531
PRP4B\_Y849
PSB2\_Y146
PTPRA\_Y271
ROA2\_Y331
SERC5\_Y345
SH2B1\_Y55
SOCS4\_Y30
SRC8\_Y334
TYK2\_Y433
UBP25\_Y69
UN93B\_Y585
Var1
WRIP1\_Y500
YIPF5\_Y42
ZCH18\_Y398
ZDH18\_Y6_S19
