# Supplementary material for: Time-resolved phosphoproteomics reveals scaffolding and catalysis-responsive patterns of SHP2-dependent signaling
Source: eLife journal article supplement (doi:10.7554/elife.64251), 2021-03-23
Supplement: supp [file elife-64251-supp-v1.zip › elife_poa_e64251_Figure_2_figure_supplement_2_source_data_1.xlsx]

## Sheet: Sheet1
pY site	SHP099_5	DMSO_5	Washout_5	p-value	FC	log2FC
TJP3 _ 188	11.9546	6.2765	6.27254	1.21e-07	1.90527	0.929992
SLC12A2 _ 957	4.33116	6.88531	6.87996	1.1e-06	0.629288	-0.668209
ARHGEF6 _ 488	10.1845	6.77088	6.75982	2.62e-06	1.50539	0.590142
SRRT _ 544	9.99902	6.98971	6.96331	1.91e-05	1.43324	0.51928
OCRL _ 133	12.0321	5.38726	5.4477	2.09e-05	2.22098	1.1512
TRAF4 _ 212	10.8061	7.94892	7.91685	3.11e-05	1.36219	0.445924
TP53BP1 _ 1099	9.83946	7.41337	7.4417	3.45e-05	1.32473	0.405696
TYK2 _ 433	10.3329	6.88947	6.84146	4.79e-05	1.50505	0.589812
KIRREL _ 621	8.24406	12.0917	12.1517	5.98e-05	0.680106	-0.556168
ZDHHC5 _ 711	8.59268	11.386	11.4301	6.12e-05	0.753214	-0.408869
CTTN _ 409	8.61234	7.71723	7.73316	8.06e-05	1.11484	0.156835
EIF2S2 _ 298	9.77372	7.34035	7.29435	8.76e-05	1.33569	0.417586
FLNB _ 651	9.86954	6.75022	6.68963	9.25e-05	1.4687	0.554537
PSMA2 _ 97	10.4065	7.18486	7.24638	9.29e-05	1.44222	0.528295
CALM1 _ 100	10.8858	7.11624	7.18883	9.45e-05	1.52195	0.605923
ARVCF _ 259	8.41448	12.6388	12.728	0.000109304	0.663424	-0.591997
STAT5A _ 682	9.18935	7.369	7.3304	0.000110063	1.2503	0.322278
PCDH1 _ 1020	6.36806	13.1823	13.3452	0.000139477	0.48011	-1.05856
CD46 _ 387	7.92268	8.32837	8.31853	0.000150718	0.951851	-0.0711926
MAP4K3 _ 366	7.58264	12.2462	12.1191	0.00019088	0.622412	-0.684059
PKP4 _ 482	7.28772	11.9121	12.0433	0.000195554	0.608443	-0.716806
NRP1 _ 920	6.67086	9.80452	9.89438	0.000199767	0.677282	-0.562171
SRP68 _ 364	8.91487	7.2222	7.26991	0.000204242	1.23031	0.299018
MAPK9 _ 185	7.93894	6.35511	6.30394	0.000252562	1.25427	0.326848
SPATA2 _ 433	7.13961	10.9935	11.1198	0.000259868	0.645729	-0.630999
ANXA2 _ 42	11.8845	7.50996	7.36568	0.000263107	1.59785	0.676129
AKAP2 _ 915	12.4405	8.00978	7.84142	0.000347467	1.56966	0.650451
WDR70 _ 618	5.57648	9.89757	10.0749	0.000403946	0.558418	-0.840584
PKP4 _ 1143	12.0028	8.83811	8.97745	0.000506325	1.34746	0.430239
ARHGAP35 _ 1058	10.9109	7.75906	7.61119	0.00052492	1.41974	0.505631
MAPK1 _ 187	5.9231	12.9666	13.3002	0.000534764	0.450995	-1.14882
RASA1 _ 460	5.54817	11.9262	11.635	0.000545175	0.470959	-1.08633
FLOT1 _ 223	7.49069	10.6291	10.7808	0.000556402	0.699744	-0.515102
LCHN _ 213	8.81495	7.79058	7.73404	0.000720582	1.13561	0.183467
CRK _ 108	11.0359	6.94373	6.71571	0.000733863	1.61586	0.692304
SPTBN2 _ 2289	9.00022	6.73108	6.85572	0.000796475	1.32485	0.405827
RBM17 _ 222	12.2467	7.60816	7.30297	0.00101283	1.64262	0.715998
CTNND1 _ 600	14.9047	8.79083	9.19106	0.0011431	1.65775	0.729225
CTNND1 _ 174	6.59436	14.0401	13.5443	0.00118407	0.478122	-1.06455
RHPN2 _ 639	11.4575	8.27837	8.49456	0.00123666	1.36619	0.450157
PLCG1 _ 771	5.68933	12.9707	13.5174	0.00130691	0.429576	-1.21902
MARVELD2 _ 23	7.51547	11.7523	11.454	0.00132869	0.647707	-0.626586
CTNNB1 _ 142	8.62041	9.78017	9.6981	0.00134272	0.885131	-0.176037
ITGB4 _ 1474	9.32546	8.60298	8.54317	0.00157582	1.08776	0.121363
CD2AP _ 361	10.416	9.78368	9.73057	0.00162057	1.06753	0.0942772
AHCYL1 _ 28	7.27967	12.9151	13.3926	0.00164817	0.553426	-0.853538
EGFR _ 693	8.66507	7.95307	7.89189	0.00169237	1.09373	0.12926
OCLN _ 337	7.34622	11.0454	10.7322	0.00194924	0.674658	-0.567771
PSMD9 _ 62	10.9972	8.4403	8.65794	0.00197006	1.28635	0.363288
LPHN2 _ 1421	9.59706	11.5738	11.7591	0.00199822	0.822618	-0.281705
EPPK1 _ 1331	10.385	6.42927	6.03267	0.00227111	1.66667	0.736967
EGFR _ 1110	9.85158	9.2509	9.18518	0.00267877	1.06873	0.0958952
NUP155 _ 992	10.6915	7.91127	7.60385	0.00273347	1.3782	0.462784
PIK3R1 _ 467	10.7662	6.7101	7.11449	0.00274128	1.55754	0.639269
UNC93B1 _ 585	13.8012	6.05698	5.19187	0.00278676	2.45379	1.29501
TAGLN2 _ 8	7.18581	11.9695	11.4821	0.00286798	0.61282	-0.706465
SF3B1 _ 426	10.5629	6.9158	6.49381	0.00297766	1.57542	0.655733
PVRL2 _ 454	9.09255	12.5683	12.2072	0.00298946	0.733994	-0.44616
PRKCD _ 333	2.64625	8.38351	7.76448	0.00323611	0.32775	-1.60933
LPHN2 _ 1448	7.97922	12.637	13.2073	0.00331147	0.617486	-0.695521
CAP1 _ 31	11.7353	6.02526	6.65078	0.00334108	1.85158	0.888756
EPHA2 _ 772	6.81347	8.72356	8.96061	0.00339635	0.770573	-0.375997
CTNND1 _ 280	8.65539	10.9573	10.6982	0.0035382	0.799371	-0.323062
AHNAK _ 715	9.61992	14.2133	14.8029	0.0036184	0.663072	-0.592762
CYCS _ 98	10.4596	6.70727	6.21994	0.00369765	1.61823	0.694418
AHNAK _ 836	8.8635	14.7769	14.0874	0.00381103	0.614148	-0.703341
PAK2 _ 130	11.0235	8.64906	8.92734	0.00385228	1.25435	0.326942
TNK2 _ 938	15.1428	8.65885	7.79267	0.00389735	1.8409	0.88041
SSBP1 _ 99	10.7253	7.36042	7.78055	0.0044044	1.41672	0.502557
PPP1CB _ 306	7.57795	10.5074	10.9264	0.00442359	0.707103	-0.500008
CTNND1 _ 241	8.38911	11.9367	12.4645	0.00475988	0.6876	-0.540359
CALD1 _ 202	9.43751	7.0548	7.36717	0.00488445	1.30877	0.38821
TYK2 _ 1054	14.9079	11.2501	10.6961	0.00492019	1.35858	0.442104
MICALL1 _ 760	9.29595	7.17318	6.84666	0.00506153	1.32611	0.407205
TJP2 _ 1017	10.133	7.62505	7.23485	0.00516904	1.36381	0.447642
EGFR _ 869	4.18815	6.60085	6.97703	0.00518952	0.616907	-0.696875
SRC _ 222	9.50365	6.11003	5.57951	0.00521478	1.62601	0.701336
DDX3X _ 301	10.5182	7.63928	7.1868	0.00526663	1.41887	0.504746
SPTAN1 _ 1073	8.08894	6.08953	6.36123	0.00527235	1.29935	0.377789
RBM15 _ 333	9.51568	7.5558	7.82314	0.00531513	1.23749	0.307422
EPB41L2 _ 88	8.98065	13.6023	14.3439	0.00547125	0.642711	-0.637757
LBR _ 166	10.6674	9.41685	9.21422	0.0055699	1.14512	0.195497
CCNYL1 _ 105	11.237	6.82031	7.43993	0.0056426	1.57599	0.656262
SERINC5 _ 345	17.0215	6.44295	4.71319	0.00566369	3.0515	1.60952
NOSIP _ 14	7.26292	12.3623	11.6327	0.00588419	0.605369	-0.724113
RCN2 _ 311	5.71183	10.6291	11.4551	0.00594932	0.517279	-0.950986
USP25 _ 69	9.79814	6.69106	7.13948	0.00599426	1.41689	0.502723
ARHGEF5 _ 1140	8.32824	13.2816	14.1239	0.00608437	0.607778	-0.718384
HNRNPH2 _ 266	10.3605	8.04081	7.63782	0.00632704	1.3216	0.402286
CPSF7 _ 494	7.52793	9.49008	9.83919	0.00660762	0.778916	-0.360461
GPRC5C _ 399	11.255	7.93635	7.32376	0.0070641	1.47509	0.5608
SRRM2 _ 1492	10.4251	7.47939	6.93003	0.00719663	1.44698	0.533048
DLG1 _ 782	10.1904	5.99509	6.66831	0.00752407	1.60942	0.686544
NUP188 _ 1523	11.8347	7.39639	6.54803	0.00752425	1.6974	0.76333
GORASP2 _ 225	9.44279	8.17249	7.9272	0.00766329	1.17304	0.230252
ABI1 _ 215	6.60067	11.2022	10.4565	0.00768601	0.609518	-0.714259
CTNNB1 _ 489	12.1026	7.71604	6.85769	0.00784887	1.66088	0.731947
PRKCD _ 334	5.97545	8.10478	8.52835	0.00808448	0.7185	-0.476941
OTUD5 _ 64	12.136	6.82052	5.7619	0.00810192	1.92903	0.947879
CBLB _ 763	7.02993	13.409	14.6837	0.00815044	0.500481	-0.998611
PKP4 _ 1156	5.68548	14.3058	16.0323	0.00818355	0.374808	-1.41577
AMOTL1 _ 691	10.6062	6.45441	7.15085	0.00827769	1.55913	0.640741
HNRNPR _ 437	10.8231	9.07574	9.36893	0.00828205	1.17358	0.230912
HNRNPU _ 271	10.8675	6.9478	6.15751	0.00828259	1.65848	0.729863
HNRNPK _ 114	10.6404	7.16371	7.74935	0.0083523	1.427	0.512983
ANXA4 _ 165	11.7836	7.81123	8.48323	0.00842987	1.44634	0.532403
PIK3R1 _ 452	9.56251	5.82064	6.45377	0.00843347	1.55812	0.639807
SMAP _ 84	7.27182	9.31763	8.97025	0.00849813	0.795261	-0.3305
ZFP36L1 _ 54	10.0162	7.11907	7.61978	0.00882833	1.35916	0.442717
PIK3R2 _ 460	12.2569	6.56335	7.55513	0.00897976	1.7363	0.796015
HGS _ 216	7.41071	4.98855	4.47625	0.00902332	1.56595	0.647039
RBCK1 _ 262	7.8198	10.0285	10.4992	0.00914464	0.761875	-0.392373
KIAA1217 _ 1044	10.428	6.42098	5.56683	0.00914961	1.73977	0.798894
HNRNPR _ 438	10.3506	8.50948	8.8379	0.00945385	1.19333	0.254994
PLCG1 _ 977	8.31751	6.51046	6.11156	0.00973693	1.31794	0.39828
PTPN11 _ 584	4.95523	14.6011	16.7343	0.00976789	0.31627	-1.66077
PIK3R2 _ 428	12.1851	8.87944	9.4815	0.00988924	1.32728	0.408475
OCLN _ 368	7.21871	11.0858	11.9504	0.00995871	0.626727	-0.674092
MELK _ 438	8.26508	10.4516	10.0456	0.0103113	0.806457	-0.310331
MYH9 _ 193	10.7363	7.28539	6.48829	0.01055	1.55896	0.64058
PKP2 _ 626	9.39168	8.63855	8.46253	0.010771	1.09837	0.135369
WWC1 _ 128	9.6754	7.40387	6.87195	0.010808	1.35549	0.438819
SRRM1 _ 769	11.3948	5.78231	4.4509	0.0110572	2.22702	1.15512
GAB1 _ 689	4.96686	15.9013	13.7689	0.011473	0.334804	-1.57861
PEAK1 _ 531	12.8323	5.96008	7.31101	0.0116739	1.93388	0.951497
ACTA2 _ 71	9.99075	6.7588	5.96012	0.0118788	1.571	0.651687
SOCS4 _ 30	12.5997	8.29856	7.22914	0.0120062	1.62287	0.698547
WRNIP1 _ 500	11.1773	6.29702	5.06965	0.0122486	1.96668	0.975761
AFAP1L2 _ 411	9.07085	9.27849	9.33086	0.0123093	0.974871	-0.0367171
PLCG2 _ 753	8.14138	9.70896	9.39305	0.0123249	0.85241	-0.23038
SPTAN1 _ 1020	11.5114	6.71714	5.48626	0.0126964	1.88659	0.915784
SLX4 _ 467	10.5221	6.84239	5.89596	0.0127362	1.65204	0.72425
MAPK10 _ 223	9.02192	7.30224	7.65721	0.0129876	1.20618	0.270449
EMSY _ 173	14.0893	6.1668	4.0978	0.0130784	2.74522	1.45692
MYO1E _ 961	10.2984	7.45312	6.70254	0.0133081	1.45503	0.541047
KIAA1549L _ 1417	10.1171	8.91981	8.59974	0.0136191	1.15495	0.207828
ARHGEF5 _ 1370	11.6823	8.4062	7.52854	0.0136683	1.46627	0.552151
DLG3 _ 808	11.5055	7.69724	6.66716	0.013897	1.60195	0.67983
CAST _ 288	11.4362	7.88477	8.65095	0.0143066	1.38322	0.468026
PAK2 _ 139	10.1903	8.36922	8.76382	0.0144439	1.18955	0.250422
CRKL _ 127	12.4511	8.53335	7.44638	0.014519	1.55836	0.640025
PHACTR4 _ 301	9.91667	8.35426	7.91742	0.014712	1.21889	0.285566
SLC6A8 _ 5	8.50527	9.99344	9.66342	0.0151979	0.865374	-0.208604
ACTN4 _ 265	11.6401	7.48963	6.3055	0.0152305	1.68756	0.754938
LSR _ 586	9.3323	11.1405	10.7337	0.0156911	0.85327	-0.228925
EIF1 _ 79	11.8386	6.57478	7.76237	0.0157851	1.65146	0.723745
AKAP2 _ 1009	11.7454	6.98666	5.58884	0.0160066	1.86799	0.901485
DYNLL1 _ 65	8.86322	5.24292	6.07017	0.0162339	1.5669	0.647909
CTTN _ 334	11.7066	7.63502	8.58009	0.0168045	1.44392	0.529988
MPRIP _ 450	11.2575	6.77338	5.41317	0.016905	1.84753	0.885596
YES1 _ 222	11.0065	8.70296	8.00275	0.0169644	1.3177	0.398018
ERBB2IP _ 1104	8.16777	10.7549	11.5414	0.0169683	0.732656	-0.448793
VTI1B _ 115	11.0529	8.17015	7.29198	0.0170274	1.42967	0.51568
AHNAK _ 964	9.00088	13.6228	15.0529	0.0174816	0.627771	-0.671689
SNRNP70 _ 226	11.5896	8.19699	7.14724	0.0174821	1.51061	0.595135
OCLN _ 420	18.6986	3.54995	7.15214	0.0177258	3.49437	1.80503
MEPCE _ 152	5.93439	9.99745	11.2678	0.017791	0.558131	-0.841325
FLNA _ 1308	8.91313	7.29064	6.78319	0.0178007	1.26663	0.34099
GAB2 _ 476	14.7594	9.91866	8.38521	0.0181872	1.61271	0.689487
AHNAK2 _ 4795	6.44462	10.7371	12.0993	0.0182426	0.564418	-0.825164
PARD3 _ 1080	7.70115	10.5481	11.4524	0.0182699	0.70009	-0.514389
API5 _ 497	6.85869	10.1676	9.3693	0.0183017	0.702127	-0.510196
LSR _ 551	7.92655	10.6191	11.4768	0.0183585	0.717466	-0.479017
PFKP _ 386	10.081	6.52331	5.38483	0.018499	1.69313	0.759696
CHAMP1 _ 282	10.9052	6.59488	5.21205	0.0185783	1.84725	0.885377
TNS1 _ 1440	13.8805	10.1613	8.96468	0.0186669	1.45149	0.537531
STAT3 _ 727	10.334	9.3138	8.98524	0.0186992	1.12945	0.175626
EPN3 _ 393	10.6773	5.99828	4.4821	0.0188912	2.03758	1.02685
SPDEF _ 329	9.01044	6.55926	5.76204	0.019009	1.46258	0.548515
ABI2 _ 183	12.0493	6.0771	4.13189	0.0190548	2.36052	1.2391
FLNA _ 2152	8.77081	6.49907	5.75869	0.0190744	1.43106	0.517086
SRRM1 _ 616	11.1841	7.26033	5.96924	0.0193813	1.69077	0.757682
CCDC132 _ 571	9.72555	6.80277	7.52847	0.0195048	1.35725	0.440688
HMGA1 _ 44	12.5858	7.08579	5.26663	0.0195494	2.03779	1.02701
C11orf52 _ 103	9.6276	15.1637	13.7781	0.0198523	0.665307	-0.587907
ZC3HAV1 _ 299	7.78358	9.95468	10.6826	0.019997	0.754322	-0.406748
OCLN _ 325	7.48955	8.52188	8.26252	0.0200218	0.892442	-0.16417
PKP4 _ 372	11.1693	7.71649	8.58422	0.0200351	1.37041	0.454604
XRCC1 _ 453	12.0718	6.65235	4.82557	0.0201752	2.10348	1.07278
LMNB1 _ 138	11.3028	7.42048	6.10892	0.0202496	1.67085	0.740581
ZC3H18 _ 398	11.0414	7.05189	5.70348	0.0202658	1.73125	0.791818
ANKRD39 _ 65	8.40446	5.50545	6.24191	0.0205211	1.43087	0.51689
PAK4 _ 181	10.2049	7.60231	6.71553	0.0205384	1.42548	0.51145
TMEM55B _ 169	9.11953	7.91349	7.49901	0.0208331	1.18339	0.242931
PKP4 _ 415	7.25392	9.29597	8.77356	0.0208433	0.80289	-0.316725
CPNE2 _ 411	10.8467	5.8453	7.12785	0.0209535	1.67218	0.741733
SHANK2 _ 34	7.55953	10.3509	11.3169	0.021075	0.697768	-0.519181
SPRED1 _ 292	9.74981	12.1772	11.5526	0.0211133	0.821738	-0.283249
TJP1 _ 1066	8.0913	14.061	12.5241	0.0211391	0.608711	-0.71617
CTNND1 _ 257	6.96424	9.69746	10.6532	0.0214388	0.684423	-0.54704
ARHGEF6 _ 188	9.60893	6.9778	6.04826	0.0218031	1.47534	0.561046
SHC2 _ 398	11.4416	9.23297	8.44593	0.0221146	1.29438	0.372257
CSK _ 64	9.7077	7.61863	8.16911	0.0222606	1.22978	0.298398
PACSIN3 _ 418	15.5301	8.19582	10.1836	0.023702	1.68995	0.756978
HSP90B1 _ 678	11.9311	8.08308	6.64891	0.0237971	1.61975	0.695769
SEC61A1 _ 279	8.14778	6.84365	7.2002	0.0241691	1.16033	0.21454
LAMTOR1 _ 140	7.39946	9.10583	9.74861	0.0242118	0.784903	-0.349414
PTK2 _ 575	8.21298	7.4495	7.6601	0.024653	1.08712	0.120512
CLTC _ 1096	11.2779	6.72806	4.97585	0.025094	1.9272	0.946509
EPS8L2 _ 570	10.2394	7.23034	6.05712	0.0255978	1.54122	0.624071
EPHA5 _ 833	5.79764	9.58102	8.51423	0.0258944	0.640791	-0.642074
POLA2 _ 141	10.8214	7.90642	6.76161	0.0258983	1.47551	0.561216
ERRFI1 _ 394	14.486	8.47898	6.08971	0.0264308	1.98865	0.991791
PKP4 _ 478	7.82773	9.00244	9.47008	0.0264679	0.8475	-0.238715
CCDC50 _ 455	5.78544	12.0833	14.5944	0.0265345	0.433728	-1.20514
RAP2C _ 166	10.2702	7.84708	6.88044	0.0265559	1.3947	0.479955
LSR _ 407	7.44878	11.3619	10.2454	0.0265899	0.68947	-0.53644
BCLAF1 _ 284	11.0311	7.36121	5.89551	0.0266058	1.66423	0.734855
ERBB3 _ 1307	13.0675	8.2161	6.24663	0.0273095	1.80706	0.853642
PKP3 _ 195	6.52583	13.9821	17.0532	0.0279468	0.420543	-1.24968
CSNK2B _ 209	9.83995	7.30074	6.25358	0.0280015	1.45193	0.537971
YES1 _ 446	10.9767	7.69892	6.3398	0.0282452	1.56377	0.645028
CDKL5 _ 171	11.3135	8.07273	6.72343	0.0284288	1.52925	0.612826
RIPK1 _ 384	7.69467	12.6347	11.1736	0.028822	0.646387	-0.629531
NUMA1 _ 169	11.2512	6.92973	5.09398	0.0293471	1.8715	0.904194
ABI2 _ 213	11.1322	13.3122	14.245	0.0296784	0.807931	-0.307695
ZFP91 _ 85	13.3924	7.5327	5.01201	0.0299338	2.13515	1.09434
GAB2 _ 643	4.43459	23.1358	17.4921	0.0301579	0.218303	-2.1956
SRRM2 _ 1014	11.6322	8.04982	6.48682	0.0306065	1.6004	0.678428
RPS2 _ 133	10.8955	7.55106	6.07874	0.0310389	1.59877	0.676963
RFC1 _ 156	9.99678	6.40404	4.81429	0.0312877	1.78222	0.833678
KIAA1217 _ 244	9.02983	7.15275	7.72898	0.0313401	1.21355	0.279228
AHNAK _ 5089	9.33887	15.7503	13.7702	0.0317671	0.632704	-0.660396
SHB _ 336	11.5036	9.52949	10.1468	0.0326797	1.16928	0.225617
IQGAP1 _ 172	10.7709	9.39393	8.76376	0.0329693	1.18638	0.246563
EFNB1 _ 317	11.496	8.59895	7.27138	0.0330371	1.44874	0.534801
ZNF579 _ 483	12.9652	7.96991	5.67061	0.0332653	1.90099	0.926749
PLCG1 _ 1254	7.11506	13.3293	11.3698	0.0332953	0.57614	-0.795509
NPDC1 _ 249	11.373	8.27914	6.85136	0.0333982	1.50333	0.588157
SDCBP _ 46	8.40408	6.6297	7.1932	0.0338326	1.21597	0.282102
VANGL1 _ 312	4.80924	6.534	5.98255	0.0343532	0.768461	-0.379957
STAP2 _ 250	16.377	7.61591	10.4289	0.034681	1.81515	0.860086
TOM1L2 _ 404	10.0912	11.1616	11.6736	0.03529	0.883828	-0.178162
PTPN6 _ 566	5.13264	12.1184	15.4662	0.0353937	0.372137	-1.42609
SPTBN1 _ 2102	11.0382	6.96504	5.00882	0.0355105	1.84371	0.88261
PRKCI _ 136	9.88883	6.68452	5.14412	0.0355616	1.67201	0.741587
TRA2A _ 202	11.2988	8.08391	6.53625	0.0356386	1.54564	0.628205
BCS1L _ 181	10.8806	7.12852	5.31714	0.0357916	1.7485	0.806121
MLLT4 _ 1229	8.30147	13.8425	12.0305	0.0361471	0.64171	-0.640006
CTNNB1 _ 675	11.0677	7.7633	8.84502	0.036233	1.33279	0.414455
BAIAP2L1 _ 163	10.1042	8.71792	9.17248	0.036372	1.12956	0.175765
TMEM106B _ 50	7.43458	9.70924	8.96191	0.0365325	0.796371	-0.328487
PLCG2 _ 763	10.7143	11.8451	11.4724	0.0368	0.918988	-0.121882
KIAA1217 _ 393	10.4325	9.11693	9.55175	0.0370324	1.11765	0.160465
NXF1 _ 75	7.36815	9.82936	9.01377	0.0372497	0.782052	-0.354664
PIK3R1 _ 470	11.4853	5.49902	7.49485	0.0377663	1.76781	0.821961
CKS2 _ 17	12.1591	5.67634	7.8511	0.0382998	1.79769	0.846145
BCLAF1 _ 290	11.2124	8.27139	6.78073	0.0385321	1.48981	0.575129
TLN1 _ 26	9.21038	7.35225	6.40579	0.0388197	1.33891	0.421058
TCOF1 _ 906	12.0931	7.63589	5.36293	0.0388865	1.86065	0.895806
MFAP3 _ 357	11.0272	8.41425	7.06692	0.0395381	1.4246	0.510554
YES1 _ 426	4.18467	7.90417	6.63022	0.0401466	0.57583	-0.796284
SLC25A5 _ 191	12.3997	7.94606	5.62489	0.0401764	1.82739	0.869784
RAB11B _ 8	10.3608	8.0759	8.86073	0.0404091	1.22347	0.290982
PIK3R2 _ 464	12.563	6.72259	8.72976	0.040457	1.62603	0.701353
CBLB _ 709	7.59038	12.5855	10.8665	0.0405824	0.647311	-0.627469
PLEKHS1 _ 209	5.86595	6.75736	6.44793	0.0413874	0.888425	-0.170678
PKP4 _ 1168	6.07878	11.8876	14.9923	0.041709	0.452291	-1.14468
RBM3 _ 127	9.71441	8.45775	7.78292	0.0420008	1.19631	0.258587
MPZL1 _ 241	5.2766	10.3936	8.60145	0.0422353	0.555575	-0.847945
PTPLAD1 _ 316	12.1297	7.77859	5.43165	0.0422766	1.83641	0.87689
STX4 _ 251	13.0063	6.6873	8.90959	0.0426324	1.6678	0.737951
STMN1 _ 16	11.5914	7.51546	5.30187	0.0427056	1.8087	0.854957
PLCG2 _ 759	11.8902	10.2771	9.39487	0.0431453	1.20885	0.273638
THRAP3 _ 344	9.98681	7.57881	6.26076	0.0432013	1.44323	0.529296
CDV3 _ 244	3.575	9.53591	12.806	0.0433437	0.320026	-1.64374
SNW1 _ 459	7.10155	9.60967	10.9938	0.0437245	0.689354	-0.536683
PKP4 _ 1115	8.93707	10.2423	10.963	0.0437578	0.842909	-0.246551
DLG5 _ 429	11.5391	4.40865	6.94813	0.0438727	2.03211	1.02298
AHNAK _ 5836	9.1204	14.091	12.3178	0.0440383	0.69071	-0.533847
PKM _ 370	9.34131	7.39253	6.30554	0.0444113	1.36389	0.447724
EGFR _ 1197	8.21357	10.6735	12.0801	0.0460476	0.72196	-0.470009
TMEM134 _ 57	7.29048	11.4638	13.8505	0.0460544	0.575996	-0.795868
ARAP2 _ 77	4.96024	7.20469	8.49573	0.046444	0.63186	-0.662323
PKP3 _ 84	8.61774	10.361	11.3728	0.0470532	0.793029	-0.334554
CDV3 _ 95	6.032	9.92173	12.1798	0.0470652	0.545844	-0.87344
STX4 _ 115	14.8262	10.0805	11.8448	0.0483823	1.35242	0.435548
AHCTF1 _ 1257	12.2348	8.17527	5.75338	0.0489459	1.75679	0.812938
MICALL1 _ 744	10.9535	6.27237	8.02321	0.0490531	1.53242	0.615816
HNRNPA2B1 _ 331	11.3301	7.06917	4.49363	0.0498685	1.95975	0.97067
PSMB2 _ 146	11.2243	7.3567	4.9945	0.0506104	1.81752	0.861971
TLN1 _ 70	8.45922	5.98827	6.92673	0.0507988	1.30998	0.389549
SLC25A6 _ 191	10.4369	7.89484	6.33652	0.0508731	1.46675	0.552624
PTPN11 _ 546	2.97876	20.791	14.0123	0.0510329	0.171177	-2.54644
NUDCD2 _ 145	7.13703	10.0438	11.8348	0.0512418	0.65242	-0.616126
HSPD1 _ 227	11.3521	7.52468	5.15723	0.0515253	1.79028	0.840182
SRRM2 _ 2581	11.4006	7.475	5.02299	0.0522387	1.82439	0.867415
PSMD9 _ 41	11.0588	5.65314	7.73424	0.0523988	1.65212	0.724318
CCDC97 _ 212	11.1332	6.94844	4.3237	0.0525436	1.97535	0.98211
TNK2 _ 937	14.4111	10.1828	7.51955	0.052853	1.62817	0.703248
SRRM2 _ 1003	11.7867	8.29169	6.08852	0.052916	1.63929	0.713073
PIK3R2 _ 467	13.1448	5.97168	8.74512	0.0529162	1.78636	0.837024
COPA _ 588	11.4868	9.58996	8.39351	0.052962	1.27748	0.353302
ACLY _ 481	11.442	7.20618	4.5093	0.0536593	1.95331	0.965918
LNPEP _ 46	8.12346	6.79283	7.31566	0.0548998	1.15157	0.203604
ENSA _ 87	9.47565	11.7869	10.8786	0.0549166	0.83613	-0.258201
ZC3HAV1 _ 77	8.93524	4.46963	6.22584	0.0550136	1.67085	0.740579
PCDH1 _ 1089	8.15647	10.8867	9.80234	0.0562689	0.788481	-0.342852
EEF1A1P5 _ 86	10.4021	8.08414	6.55112	0.0565662	1.42151	0.507426
PNP _ 249	10.6954	7.88455	9.00436	0.0566653	1.26656	0.340912
SRP14 _ 27	10.2257	8.29874	7.00101	0.0579936	1.33671	0.418685
EIF5B _ 214	10.1934	8.46004	7.28639	0.0584202	1.29469	0.372611
IRF2BP2 _ 360	10.3008	7.36226	5.36573	0.0586964	1.6186	0.694746
CAV1 _ 6	7.11793	12.9754	10.6003	0.0589987	0.603837	-0.727769
CTNND1 _ 228	6.61449	11.3812	9.44809	0.0590224	0.635115	-0.65491
SRSF9 _ 211	10.485	7.70955	5.79648	0.0598545	1.55265	0.63473
LASP1 _ 186	7.24085	11.6267	9.83546	0.0599837	0.674755	-0.567564
SRRM1 _ 402	10.7429	7.34133	4.99031	0.0600761	1.74233	0.801022
SLC39A10 _ 596	10.7385	9.48264	8.61198	0.0603274	1.18693	0.247231
MAPK3 _ 204	6.1838	16.8919	12.483	0.0611073	0.421025	-1.24802
EMD _ 59	10.4387	8.50398	7.14786	0.0612277	1.33387	0.415613
ARHGAP35 _ 1105	9.59107	4.98563	6.88477	0.0613237	1.61596	0.692395
PRDX6 _ 89	8.99186	5.66221	7.03633	0.0614338	1.4162	0.502029
FRK _ 46	12.4771	8.18458	5.1401	0.0622069	1.87278	0.905184
TRIP10 _ 590	11.5686	5.56389	8.06867	0.0629617	1.6972	0.763156
SPRED2 _ 251	8.55712	16.0588	12.9154	0.0636189	0.590672	-0.759571
PTPRK _ 917	9.51717	8.24944	7.33105	0.0639929	1.22168	0.288864
TEC _ 228	13.3879	5.65074	8.9032	0.0640862	1.83976	0.87952
ZFP91 _ 83	13.7701	7.66429	3.21284	0.064535	2.53193	1.34024
CTNND1 _ 193	7.60612	16.1124	12.4992	0.0656346	0.531681	-0.911367
PAG1 _ 359	3.60654	8.836	6.60615	0.0662161	0.467103	-1.09819
PTPRK _ 850	7.54613	10.5465	9.26572	0.0663882	0.761764	-0.392584
FRK _ 193	11.594	9.36154	7.68728	0.0669891	1.36009	0.443703
MLLT4 _ 1496	5.34336	13.1396	18.9867	0.0669912	0.332647	-1.58794
SNRNP70 _ 126	10.4282	8.18926	6.50277	0.0673755	1.41957	0.50545
SND1 _ 109	9.79307	7.59368	5.93541	0.0674572	1.44771	0.533768
EXOC4 _ 247	10.6663	5.32504	7.6214	0.0674815	1.64775	0.7205
EPHB4 _ 614	12.0016	7.67741	4.40508	0.0677821	1.98661	0.990311
MYL12B _ 156	6.70192	8.90314	10.575	0.0681056	0.688149	-0.539208
LSM14A _ 216	10.2059	7.06623	4.67679	0.0682855	1.73821	0.797601
MKI67 _ 2223	9.48005	7.1441	5.36196	0.0685051	1.51607	0.600338
FLOT1 _ 238	7.62125	11.0295	9.55119	0.0688644	0.74062	-0.433194
EGFR _ 998	7.30941	10.4757	12.9295	0.0699131	0.624595	-0.679006
EML4 _ 226	9.77893	8.20434	6.97222	0.070791	1.28869	0.365904
CLMN _ 635	10.483	8.05118	6.12812	0.0717564	1.47864	0.564266
ZC3H18 _ 534	11.3971	7.65145	4.64926	0.0730039	1.85307	0.88992
42987 _ 278	7.97801	5.93657	6.84684	0.0733742	1.24818	0.319829
DDR1 _ 798	10.393	8.98461	7.85028	0.0734568	1.2347	0.304155
CSRP1 _ 71	7.93108	10.1085	9.13538	0.0737602	0.824271	-0.27881
MYO1D _ 435	10.6949	6.56582	8.43675	0.0761303	1.42575	0.511716
ITGB4 _ 1207	10.4991	8.0017	5.9094	0.0772001	1.50946	0.59403
CAT _ 84	11.1031	8.19513	5.75339	0.0774187	1.59201	0.670846
PLCG2 _ 1217	7.82049	9.60397	8.78706	0.07805	0.850468	-0.233671
CDV3 _ 190	4.7627	9.10775	12.8235	0.0791987	0.43433	-1.20314
PPFIBP2 _ 422	15.2628	12.112	9.40261	0.0797417	1.41883	0.504701
PTPRA _ 798	11.8367	8.76678	6.11267	0.0802741	1.59102	0.669947
CEP55 _ 284	9.39899	6.05516	7.60569	0.0802824	1.37605	0.46053
EPB41L1 _ 796	3.48226	10.2039	7.08134	0.0806223	0.402918	-1.31144
LDLR _ 828	10.5246	8.93061	9.67228	0.0809136	1.1315	0.178242
PRPF4B _ 849	11.8449	8.02741	4.66883	0.0820141	1.86589	0.899865
ERBB3 _ 1328	11.186	9.20209	7.45363	0.0821921	1.3432	0.42567
OTUD4 _ 438	4.15427	6.595	8.75373	0.0825465	0.541317	-0.885454
PGK1 _ 196	8.59135	7.0454	5.67603	0.0826967	1.35069	0.433696
RIN1 _ 681	10.5037	8.35777	6.44973	0.0830787	1.4187	0.504573
MLLT4 _ 1181	10.8525	8.7673	6.90479	0.0835396	1.38495	0.469833
ARFGAP2 _ 278	8.69967	8.00088	7.37558	0.0837268	1.13156	0.178309
PLEKHA6 _ 492	6.36332	11.7161	9.1812	0.0842659	0.609008	-0.715467
DAPP1 _ 139	8.65869	11.6715	14.3886	0.0845219	0.664517	-0.589621
HDAC4 _ 465	11.4943	8.35935	5.52394	0.0848153	1.65585	0.727572
FAM20B _ 138	11.663	8.50813	5.64024	0.0853328	1.64868	0.721309
BAIAP2 _ 505	9.38963	10.4583	11.4304	0.0853958	0.857943	-0.221047
TJP2 _ 1038	9.53993	15.1106	12.4554	0.0855268	0.692152	-0.53084
SRRM2 _ 1083	11.3078	8.58825	6.05799	0.0877428	1.54412	0.626782
VASP _ 39	9.44463	7.47523	5.63572	0.0881505	1.44072	0.526795
AHNAK _ 5731	10.5819	9.3491	8.19629	0.0882701	1.20623	0.270508
HIPK3 _ 362	10.3277	8.37524	6.53885	0.0888817	1.38495	0.469837
FRK _ 99	10.862	7.41689	9.08701	0.08892	1.3163	0.396483
SHB _ 96	10.5441	8.68864	6.94152	0.0889958	1.3492	0.432107
YES1 _ 223	11.414	8.91639	6.55304	0.0895144	1.47569	0.56139
TNK2 _ 859	10.889	9.7122	8.58995	0.0903426	1.18991	0.250857
CD46 _ 384	2.54955	6.66232	4.65332	0.0904871	0.450624	-1.15
PKP3 _ 390	10.4849	7.99004	5.60229	0.0907242	1.54276	0.625516
FAM83B _ 896	9.85077	8.5966	7.38655	0.0915854	1.23264	0.301757
GSK3A _ 282	11.3078	7.73113	4.21813	0.0935091	1.89263	0.920391
HBS1L _ 58	6.69814	10.1822	13.6173	0.0939185	0.56288	-0.829101
EPB41L4B _ 493	7.17673	9.84855	12.4857	0.0940416	0.642665	-0.637861
HDLBP _ 437	9.0109	6.01168	7.50479	0.0945181	1.33332	0.415025
SPTAN1 _ 1261	10.9	8.8905	6.87469	0.0958116	1.38279	0.467581
AGFG1 _ 336	7.36931	9.04626	10.7317	0.0960176	0.745205	-0.424291
ACTR3 _ 16	11.0577	8.44744	5.82088	0.096151	1.54996	0.632231
CLDN3 _ 198	6.95702	6.08922	5.21529	0.0962407	1.23084	0.299642
SRRM1 _ 260	9.23208	7.51219	5.76803	0.0970093	1.39035	0.475449
PTPRA _ 271	9.46504	6.0762	7.78333	0.0971188	1.36585	0.449801
ERP29 _ 66	12.2743	7.82572	3.29046	0.0975953	2.20836	1.14298
EMD _ 94	5.9519	9.34422	7.62561	0.098393	0.701468	-0.51155
ARHGEF5 _ 1100	6.68115	14.3455	10.4464	0.0993374	0.538978	-0.891702
SYK _ 323	4.71645	12.5175	8.54714	0.0994362	0.447807	-1.15905
PTBP3 _ 133	9.98228	8.09563	6.13922	0.0994925	1.40251	0.488013
CLTC _ 430	9.74823	7.58828	5.33866	0.0999825	1.5082	0.592831
CTNND1 _ 904	8.50266	15.1179	11.7326	0.100695	0.633333	-0.658964
FRK _ 132	12.6511	9.20666	5.55384	0.102025	1.71418	0.777519
LSR _ 406	8.89152	13.1547	10.9585	0.102234	0.737481	-0.439322
SIN3A _ 277	10.7757	8.20494	5.46709	0.102506	1.57632	0.656556
TAGLN2 _ 192	8.18571	9.60209	8.87039	0.102898	0.88626	-0.174198
KIAA1522 _ 300	4.55728	9.91692	15.6753	0.10351	0.356145	-1.48946
SHC1 _ 428	13.3048	11.51	9.57416	0.103961	1.26206	0.335781
TMEM209 _ 98	11.2122	8.06972	4.65304	0.104878	1.76253	0.817651
SLC12A2 _ 956	5.7006	8.56829	7.07225	0.105239	0.728951	-0.456106
SNX16 _ 86	9.35244	6.49288	7.98651	0.105536	1.29183	0.369413
PDLIM1 _ 321	8.74369	12.4631	10.5197	0.105622	0.760891	-0.394238
PKP2 _ 166	6.53958	12.1004	18.2738	0.107293	0.430601	-1.21558
ITSN2 _ 968	6.40553	9.73176	13.4625	0.108491	0.552339	-0.856375
LSR _ 615	8.79312	10.4375	12.3028	0.109822	0.773352	-0.370803
RPL15 _ 59	10.6755	8.87866	6.83026	0.110408	1.35916	0.442718
EEF1A1P5 _ 29	9.62874	8.07808	6.26113	0.113673	1.34299	0.425453
DYRK1A _ 321	9.96784	8.12501	5.95986	0.113999	1.4154	0.501206
IQGAP3 _ 1098	8.57031	9.19009	9.92217	0.114639	0.896838	-0.15708
GMDS _ 323	10.041	7.38334	4.22963	0.115196	1.72927	0.790164
PLXNB2 _ 1621	8.46296	7.70691	6.79789	0.116783	1.16692	0.222704
DLG3 _ 673	11.0198	4.68101	8.15789	0.118045	1.71663	0.77958
HCFC1 _ 411	9.91924	8.36881	6.47638	0.118617	1.33636	0.418306
EPB41L1 _ 864	8.19052	16.1732	11.776	0.119201	0.5861	-0.770781
PTPN9 _ 333	8.07278	3.47557	6.01971	0.12047	1.70038	0.765856
MPP5 _ 245	10.3702	8.19013	5.42514	0.123342	1.52332	0.607217
PLCG1 _ 783	9.82505	11.6219	10.616	0.12368	0.883632	-0.178482
PLS3 _ 127	9.79659	7.96961	5.6277	0.124663	1.44096	0.527029
EGFR _ 1069	10.7111	14.8682	12.53	0.125019	0.781883	-0.354975
ANXA1 _ 21	8.13225	10.8684	14.427	0.126479	0.642984	-0.637146
MIA3 _ 1678	11.5844	8.47883	4.40337	0.127604	1.79852	0.846809
BICD2 _ 582	9.34522	7.68765	5.49196	0.128785	1.41813	0.503993
CDK16 _ 252	9.7038	7.95226	5.62007	0.129438	1.42994	0.515953
EPHA4 _ 779	3.59193	8.55342	5.69856	0.131674	0.50406	-0.988333
LRRC16A _ 1339	10.0412	6.59491	8.58023	0.132023	1.32338	0.404225
VAV2 _ 442	9.59294	5.55018	7.88164	0.132352	1.42839	0.51439
ANXA2 _ 256	8.45675	5.22856	7.09156	0.132563	1.37284	0.457159
MYO6 _ 1146	6.96898	10.519	15.3864	0.133163	0.538031	-0.894239
PLEC _ 4642	12.0582	8.00836	10.3523	0.133432	1.31349	0.393403
NUP214 _ 667	9.53731	7.96167	5.78818	0.133942	1.38726	0.472238
GAREM _ 596	8.21152	11.9559	9.77849	0.13488	0.755625	-0.404258
CHRM3 _ 365	3.62576	7.66584	13.3256	0.135925	0.345451	-1.53345
SYNPO _ 804	10.1863	8.80158	6.84399	0.137101	1.30213	0.38087
GNAI3 _ 61	10.7853	5.07162	8.45168	0.14024	1.59507	0.673621
FRK _ 387	4.51598	8.12618	13.3646	0.140473	0.420271	-1.25061
ANXA1 _ 207	9.89382	8.11267	5.51671	0.141052	1.45184	0.53788
TOLLIP _ 83	9.98759	7.08709	8.81965	0.143357	1.25577	0.32857
IRF2BPL _ 69	6.72434	6.587	6.66906	0.143433	1.01453	0.0208139
PTPN3 _ 496	11.6542	9.29197	10.7163	0.146433	1.16494	0.220257
SLC4A2 _ 73	8.89496	8.71669	8.8243	0.146802	1.01419	0.0203308
PIK3R3 _ 184	9.93209	4.8346	7.91481	0.147153	1.55805	0.639739
HNRNPA2B1 _ 131	10.9684	3.83152	8.14785	0.147447	1.83122	0.872802
SLC7A11 _ 15	6.50868	10.0142	7.89171	0.147824	0.726985	-0.460002
PCDH1 _ 1158	6.79809	8.25294	10.5254	0.150158	0.724034	-0.465871
MYL6 _ 89	8.97101	8.23697	7.07264	0.152198	1.17195	0.228905
PTTG2 _ 111	7.42843	9.84927	13.6942	0.152372	0.631039	-0.664199
ACLY _ 682	9.37254	7.86882	5.47486	0.152685	1.40479	0.490356
CRK _ 136	13.3122	2.89418	9.34227	0.155355	2.17583	1.12157
POLR2G _ 17	10.8869	8.92518	5.72683	0.155861	1.48606	0.571495
YIPF5 _ 42	11.4877	9.1299	5.21665	0.15825	1.60145	0.679381
KPNA6 _ 474	8.22648	7.48525	7.9479	0.158331	1.06608	0.0923145
ADAM9 _ 769	8.90918	8.32783	7.35915	0.158777	1.13587	0.183796
MARVELD2 _ 469	8.38417	5.12305	7.1613	0.158818	1.36502	0.448919
MAPK11 _ 182	7.59959	9.57003	8.33657	0.159372	0.848803	-0.236499
USP24 _ 101	4.88684	10.1163	18.9209	0.16017	0.336592	-1.57093
CD44 _ 706	11.709	9.26034	5.1313	0.160378	1.62719	0.702384
MTMR6 _ 598	6.5938	7.80404	9.86188	0.161498	0.746499	-0.421787
EEF1D _ 499	9.44812	8.21189	6.10178	0.162013	1.32015	0.400707
INADL _ 393	10.1107	9.26393	7.80482	0.163298	1.1847	0.24452
AGO3 _ 189	8.68454	7.56708	8.27738	0.164957	1.09622	0.132543
DNAJB1 _ 176	10.5735	3.64917	8.05174	0.165055	1.8073	0.853835
SLC4A1AP _ 82	8.92523	7.83428	5.90136	0.16705	1.29957	0.378036
RALGPS2 _ 278	11.2299	6.98173	9.70784	0.168518	1.34573	0.428393
CSNK1A1 _ 322	6.47017	2.79425	5.15902	0.169457	1.62705	0.702255
G6PD _ 447	9.97805	8.07904	4.65306	0.169495	1.56739	0.64836
GAB2 _ 614	9.08983	9.83158	11.1716	0.169684	0.865565	-0.208285
DDX17 _ 580	6.16095	15.4671	9.47201	0.169984	0.49408	-1.01718
SLC12A2 _ 275	9.8816	6.20319	8.57758	0.170747	1.33709	0.419096
PHACTR4 _ 657	8.85328	6.52001	8.02624	0.170776	1.21726	0.283637
PKP4 _ 114	7.9349	13.2141	9.80476	0.170932	0.689425	-0.536534
HIPK1 _ 352	9.70236	8.22928	5.50782	0.172718	1.41258	0.49833
SH3PXD2B _ 230	8.47711	5.85496	7.55626	0.172721	1.26418	0.338205
INPPL1 _ 1135	7.30499	8.52063	10.775	0.173233	0.757164	-0.401322
FAM105B _ 56	6.40781	8.4901	12.3849	0.174396	0.613921	-0.703875
RAB7A _ 72	18.1462	2.25553	12.6459	0.17574	2.4355	1.28422
CDCP1 _ 806	4.58039	8.87344	6.05532	0.177287	0.613633	-0.704553
ISOC1 _ 160	11.9849	10.0962	6.48586	0.177351	1.44552	0.531594
GAB1 _ 259	8.29881	10.7121	15.33	0.177489	0.637338	-0.64987
IQGAP1 _ 1526	7.80381	5.29688	6.94947	0.178963	1.27447	0.349899
ZDHHC18 _ 6	8.23356	9.7063	8.7351	0.179109	0.892943	-0.16336
RAPH1 _ 856	11.0406	8.90418	4.72906	0.180357	1.61966	0.695687
PFN1 _ 129	8.80622	8.10767	6.73663	0.180943	1.18648	0.246685
PXN _ 88	4.01084	6.74764	12.1444	0.18158	0.424606	-1.2358
SLC34A2 _ 17	6.0322	8.88382	14.5193	0.181877	0.515504	-0.955943
PDZK1IP1 _ 99	10.0031	8.75099	6.27465	0.181981	1.33147	0.413019
SLC25A5 _ 195	9.93615	8.97543	7.06785	0.182518	1.23867	0.30879
SHB _ 272	8.69508	9.16052	10.0856	0.182659	0.903565	-0.146299
DYRK2 _ 382	10.4577	8.74522	5.31089	0.183871	1.488	0.573374
PLEC _ 4668	10.5141	10.7849	11.3339	0.185304	0.950689	-0.0729552
SLTM _ 553	9.98919	9.07618	7.22387	0.18545	1.22566	0.293563
ZDHHC5 _ 630	9.61319	11.1369	10.1151	0.185911	0.904687	-0.144509
GPRC5A _ 317	11.6527	8.99203	3.52353	0.187214	1.86212	0.896945
EGFR _ 978	9.58565	8.66773	6.77483	0.187667	1.24146	0.312037
FNBP1L _ 566	8.88997	4.24492	7.38473	0.189227	1.52884	0.612441
RCN2 _ 313	9.33963	8.59963	7.0445	0.19024	1.19401	0.255816
NAALADL2 _ 106	9.82474	8.77469	6.56529	0.190405	1.28093	0.357194
PGM2 _ 165	12.6387	9.8281	3.90255	0.190676	1.84095	0.880448
CCNK _ 324	10.3535	9.14108	6.57889	0.190999	1.31724	0.397519
SLITRK6 _ 820	7.82243	10.9988	17.7185	0.191141	0.544787	-0.876236
KIRREL _ 638	7.79244	8.32631	9.46307	0.192022	0.876078	-0.190869
PRKD2 _ 378	8.30214	7.74675	6.56152	0.192327	1.16047	0.214706
MINK1 _ 906	8.36197	10.7768	15.9443	0.192701	0.625872	-0.67606
42985 _ 319	9.16859	10.0534	11.9705	0.194393	0.832604	-0.264298
CD44 _ 697	7.55134	8.80945	11.5537	0.195294	0.741669	-0.431152
SF3B4 _ 16	9.07706	6.64981	8.32377	0.197819	1.21241	0.277877
PDHA1 _ 331	12.6344	9.65658	2.98016	0.199022	1.99963	0.999734
EMD _ 49	9.8996	8.79581	6.30811	0.199729	1.31086	0.390519
CC2D1A _ 207	7.68974	7.38247	6.67742	0.202149	1.09386	0.129422
VTI1B _ 68	9.35549	5.10365	8.06536	0.202218	1.42083	0.506737
AHNAK _ 1469	9.39313	11.841	17.4698	0.202436	0.640933	-0.641755
SRC _ 193	9.24711	8.39546	6.42636	0.203181	1.24777	0.319352
HNRNPA3 _ 358	11.8458	10.1461	6.18769	0.204157	1.45047	0.536516
GDI2 _ 442	12.1588	10.425	6.37979	0.204409	1.44706	0.533121
RNF114 _ 116	8.13933	9.52636	12.7663	0.20456	0.730225	-0.453587
RAB11FIP1 _ 435	10.3417	6.16957	9.09595	0.205321	1.35491	0.438196
IQSEC1 _ 343	7.58381	8.7227	11.4217	0.206502	0.752947	-0.40938
WRNIP1 _ 111	4.50255	6.2158	10.2787	0.206596	0.545945	-0.873174
NCK2 _ 99	8.84067	10.389	14.0794	0.207273	0.722618	-0.468695
VCL _ 692	9.31117	8.26615	5.75236	0.20851	1.32841	0.409702
NRK _ 984	9.32506	9.7767	9.4563	0.210499	0.969694	-0.0443988
KIRREL _ 663	8.88029	8.77044	8.50132	0.210962	1.0283	0.040264
PVRL4 _ 502	8.39087	11.3249	9.23902	0.211474	0.816077	-0.293223
PTPN1 _ 46	9.11686	6.89186	8.47833	0.212838	1.1863	0.246475
PARD3B _ 1000	5.19434	6.80169	10.8477	0.21458	0.588614	-0.764606
PKP3 _ 176	11.2533	10.4075	11.0142	0.215634	1.05064	0.0712737
TLN1 _ 127	10.7357	4.14405	8.87242	0.215659	1.64955	0.722076
EPHB4 _ 581	10.2073	9.37396	7.25566	0.215885	1.2276	0.295844
PI4KA _ 633	15.0994	12.539	6.01008	0.216296	1.62806	0.703149
TMEM192 _ 213	10.9354	9.16583	4.64799	0.216461	1.58326	0.662898
SET _ 7	9.32362	8.50242	6.40321	0.216629	1.25102	0.323105
PXN _ 118	3.76819	6.45851	13.4067	0.217992	0.379377	-1.3983
GAREM _ 453	11.1493	9.58228	10.7144	0.219041	1.09863	0.13571
VCL _ 822	9.11271	8.08155	5.39323	0.219239	1.35256	0.43569
ARHGAP32 _ 621	9.68306	12.7841	10.5281	0.22237	0.83073	-0.267548
EPB41L2 _ 623	4.55405	8.25022	18.2048	0.223525	0.344287	-1.53832
PTRF _ 156	7.4759	16.727	9.9768	0.223812	0.559914	-0.836724
USP24 _ 2024	9.05879	8.49646	8.90706	0.224149	1.04103	0.0580108
LYN _ 508	10.8116	10.6283	10.132	0.22422	1.04156	0.0587518
ARVCF _ 182	8.02262	10.1709	8.59522	0.226348	0.85501	-0.225987
MICALL1 _ 391	9.11154	7.84004	4.31957	0.227147	1.49866	0.58367
PAK2 _ 453	10.3341	4.43101	8.77492	0.227957	1.56507	0.64623
SGK223 _ 411	6.96578	7.70799	9.83083	0.23137	0.794327	-0.332195
PCDH1 _ 962	8.93396	9.46116	11.0242	0.236	0.872227	-0.197225
ZYX _ 267	8.43855	7.80041	5.90352	0.236332	1.23155	0.300477
PIK3R2 _ 453	12.4043	4.48401	10.4108	0.236352	1.66559	0.736032
HNRNPA2B1 _ 259	9.7761	8.82069	5.9714	0.236749	1.3218	0.402505
JAK2 _ 570	11.285	9.82291	5.45797	0.23688	1.47702	0.562685
CAPRIN1 _ 78	6.8766	3.58948	6.05606	0.237764	1.42586	0.511832
CLINT1 _ 293	4.05645	6.8608	15.3123	0.23809	0.365889	-1.45052
TJP2 _ 292	12.2984	6.86787	10.9501	0.238677	1.38045	0.46514
ANO1 _ 7	8.49219	13.9241	9.84085	0.238678	0.714681	-0.484629
KIF23 _ 582	11.3686	4.50295	9.67504	0.23978	1.60369	0.681397
CDC42BPB _ 1638	7.40672	12.806	8.71977	0.242161	0.688172	-0.539159
CSK _ 18	7.33097	3.95674	6.51122	0.242329	1.40065	0.486096
OTUD6B _ 272	8.62023	8.53142	8.25274	0.243218	1.02719	0.0386975
HNRNPA2B1 _ 262	6.32473	11.576	7.59027	0.243667	0.659985	-0.599496
EIF1 _ 30	6.98361	7.27342	8.19007	0.244202	0.903238	-0.146821
EGFR _ 1081	10.9984	14.6932	11.8846	0.244469	0.827643	-0.272919
LSR _ 535	10.7682	8.4262	10.2079	0.244865	1.15575	0.208833
CFL1 _ 140	8.4889	4.83554	7.6203	0.245898	1.36304	0.446828
FLNB _ 2533	11.4043	12.1722	11.5865	0.246251	0.960014	-0.0588727
CD2AP _ 409	10.1967	8.25923	9.74174	0.247934	1.1329	0.180022
RAPH1 _ 366	9.62838	5.28789	8.61441	0.248764	1.38515	0.470041
EPS8L1 _ 526	7.48518	4.46011	6.78259	0.249701	1.33156	0.413119
CDK3 _ 19	9.49944	8.40974	4.76463	0.251164	1.44211	0.52818
CXADR _ 318	9.13935	12.7919	9.97424	0.252254	0.80289	-0.316726
MYH9 _ 754	9.12198	8.62196	6.9339	0.252294	1.1728	0.22996
CAPRIN1 _ 670	7.15855	11.6697	8.18578	0.252858	0.721066	-0.471797
TFRC _ 20	8.81298	9.66314	9.00568	0.253585	0.944139	-0.0829287
GPRC5A _ 347	8.90059	8.76295	8.28327	0.256168	1.04429	0.0625217
PGAM4 _ 92	9.92768	8.7204	4.4676	0.257466	1.50556	0.590304
INADL _ 938	7.19319	9.0087	7.59325	0.257998	0.866549	-0.206648
TKT _ 283	10.5445	9.46212	5.46915	0.262984	1.41241	0.498155
GMDS _ 327	10.7903	9.63652	5.34264	0.264026	1.4407	0.526772
FER _ 402	5.30871	9.00304	6.09034	0.264174	0.703448	-0.507484
CDK16 _ 249	10.1519	9.03282	4.79921	0.265942	1.46789	0.553744
PTK2 _ 570	9.13839	8.28104	5.01084	0.266907	1.37503	0.459467
PAG1 _ 341	5.79621	10.5192	6.76873	0.268184	0.670551	-0.57658
DNM1L _ 629	8.42482	7.81742	5.44614	0.269604	1.27037	0.345251
CTTN _ 154	8.93206	14.005	9.96228	0.270197	0.745354	-0.424002
LSM14A _ 220	9.05785	8.4159	5.87877	0.271019	1.2673	0.341763
ABI1 _ 183	9.80189	9.05802	6.03879	0.274055	1.29854	0.376888
CPNE3 _ 392	5.5332	5.31773	4.4408	0.274361	1.13402	0.181451
ANXA5 _ 94	9.40125	8.66756	5.67216	0.274716	1.31122	0.390908
CBFB _ 85	10.2876	8.47754	9.93403	0.275743	1.11751	0.160287
HNRNPA3 _ 145	7.79842	4.85544	7.22455	0.275968	1.29113	0.368635
EIF4G1 _ 1084	6.55909	11.9149	7.60008	0.276421	0.67221	-0.573016
HSP90AA1 _ 353	8.42565	8.05696	6.52817	0.276464	1.15538	0.208362
NUP35 _ 300	8.54753	8.78156	9.75851	0.277218	0.92206	-0.117067
SH3PXD2B _ 855	11.9933	5.92039	10.8276	0.278157	1.43221	0.518239
ACTB _ 218	9.54982	8.92026	6.23976	0.279412	1.25987	0.333275
SRSF11 _ 207	7.77549	5.52918	7.35262	0.280813	1.20721	0.271672
TCOF1 _ 583	10.0922	9.13562	4.95672	0.282242	1.43229	0.518328
NSFL1C _ 169	6.90843	11.1672	7.69855	0.282777	0.732376	-0.449343
MAPKAP1 _ 497	9.88247	6.9465	9.33861	0.282983	1.21368	0.27939
ERBB2IP _ 1164	8.23069	15.0894	9.47287	0.28597	0.670189	-0.57736
MAGI1 _ 373	9.92455	9.15261	5.65957	0.28605	1.34005	0.42229
GAB1 _ 406	11.9074	9.62534	11.5019	0.288461	1.1272	0.172748
EPHA2 _ 628	9.15685	8.68995	6.49899	0.289913	1.20573	0.269903
EEF1A1P5 _ 141	9.22484	8.39747	4.50638	0.290147	1.42978	0.515794
EPHA2 _ 575	7.20449	7.71447	10.1656	0.292418	0.805867	-0.311387
SCAMP1 _ 73	4.24132	6.3791	16.665	0.292529	0.368104	-1.44181
C6orf132 _ 1142	8.65496	12.9855	9.39616	0.293197	0.773396	-0.37072
MKI67 _ 357	9.69302	8.99322	5.59366	0.293523	1.32901	0.410347
FLNA _ 2379	9.61484	8.94488	5.68668	0.293637	1.31426	0.394251
KLC2 _ 582	8.90742	8.21852	4.86287	0.293799	1.36185	0.445565
MGP _ 107	10.4004	9.45169	4.7693	0.295149	1.46269	0.548621
CLDN4 _ 208	8.01104	8.30254	9.74409	0.295352	0.887816	-0.171668
DBI _ 90	10.27	9.45045	5.35829	0.296337	1.38702	0.471985
RPSA _ 139	10.2626	9.45216	5.37245	0.297153	1.38454	0.469409
FAM129B _ 665	8.8251	8.29916	5.63968	0.297612	1.26626	0.340575
SLC15A1 _ 697	9.35936	8.83831	6.19783	0.297832	1.24492	0.316048
PCDH1 _ 1192	9.09481	7.231	8.78896	0.298353	1.13543	0.183244
SEC31A _ 799	9.24848	8.74624	6.18083	0.298628	1.23915	0.309357
RPS16 _ 82	9.3471	8.75816	5.74973	0.298634	1.28855	0.365754
SHB _ 246	8.19067	9.23527	14.6958	0.300931	0.684521	-0.546832
EIF4G1 _ 1238	7.76567	7.36153	5.2237	0.302099	1.23409	0.303452
MPZL1 _ 263	5.44222	14.4797	6.86648	0.303124	0.5099	-0.971714
INSR _ 1189	7.18754	7.67732	10.3728	0.305942	0.796399	-0.328437
CAV1 _ 14	8.20319	9.11327	14.1749	0.306951	0.704494	-0.505341
CTTN _ 297	9.41924	14.1893	10.1393	0.308019	0.774335	-0.368971
NT5DC2 _ 456	10.3061	9.84448	7.24431	0.308161	1.20618	0.270442
PLEKHA1 _ 345	6.97195	7.92797	13.3242	0.30835	0.656118	-0.607974
DDX3X _ 266	9.03033	8.87659	8.00521	0.30874	1.06983	0.0973816
RAB10 _ 6	7.83286	3.27814	7.16091	0.310546	1.50068	0.58562
SEC61A1 _ 276	6.90202	3.33817	6.3775	0.310805	1.4208	0.506707
GSK3A _ 279	9.09967	8.56465	5.45701	0.311029	1.29794	0.376229
C11orf52 _ 78	9.39418	10.9982	9.6267	0.312447	0.910955	-0.134549
TJP2 _ 1066	9.89736	8.86176	9.74821	0.313142	1.06366	0.0890396
EPB41L1 _ 68	9.64039	15.6897	10.5114	0.313168	0.735877	-0.442463
LIN7C _ 58	9.4593	8.95826	5.95286	0.313981	1.26876	0.343416
BAIAP2 _ 164	10.151	4.55252	9.35599	0.314637	1.45968	0.545655
SNTB1 _ 87	9.11933	8.10965	8.97643	0.314984	1.06746	0.0941789
G3BP2 _ 225	9.77525	9.18774	5.57898	0.31612	1.32396	0.404856
WDR13 _ 128	4.71882	5.43324	9.92317	0.318151	0.614573	-0.702344
LDLR _ 845	7.60153	8.01309	10.6279	0.319103	0.815572	-0.294115
CLCC1 _ 412	10.1088	9.46263	5.23265	0.321691	1.37579	0.460263
ASS1 _ 131	9.0568	8.59215	5.54909	0.321734	1.28091	0.357164
HGS _ 237	4.92674	6.07558	13.6652	0.322476	0.499143	-1.00248
TAB1 _ 391	8.83921	6.80515	8.57946	0.325291	1.1491	0.2005
42980 _ 52	9.18611	11.0367	9.42056	0.326048	0.898076	-0.155091
PRKCD _ 374	9.55061	9.0055	5.20322	0.327019	1.34433	0.426887
UPF3B _ 117	9.8441	3.51333	9.05285	0.32732	1.56676	0.647784
GOT2 _ 96	9.37056	9.01125	6.41599	0.329847	1.21481	0.280727
CIC _ 277	12.7646	12.3563	9.31928	0.332175	1.17778	0.236075
CDK16 _ 254	9.90123	9.35924	5.23023	0.334032	1.35731	0.440752
STAT3 _ 539	13.7843	13.3078	9.6724	0.334158	1.19966	0.262628
_ 28	9.57369	7.39188	9.32301	0.334887	1.14553	0.196013
TANC1 _ 1827	7.63188	8.00118	11.017	0.339251	0.802589	-0.317267
MCFD2 _ 135	9.27964	12.8577	9.66765	0.339746	0.823928	-0.27941
PPP1CA _ 317	7.15701	8.45161	7.29585	0.340644	0.908973	-0.13769
MYO1E _ 974	8.89427	9.19979	8.92649	0.342005	0.981368	-0.0271338
PEAK1 _ 1107	7.90941	2.329	7.3215	0.342074	1.63917	0.712966
SH3PXD2B _ 226	9.13006	4.4359	8.64552	0.343684	1.39588	0.481176
NUCKS1 _ 214	10.4072	9.89473	5.40436	0.34428	1.3605	0.444133
MAPK14 _ 182	6.76839	9.64928	7.05498	0.346512	0.810379	-0.303332
MPP7 _ 417	8.3305	5.56131	8.05814	0.347365	1.22332	0.290806
PEBP1 _ 181	11.2458	7.30207	10.8679	0.349284	1.23784	0.307827
MICALL1 _ 640	6.18968	5.92736	3.27228	0.353758	1.34563	0.428287
PKM _ 105	9.78692	9.34241	4.57913	0.35722	1.40601	0.491609
PKM _ 175	10.2948	9.79606	4.31928	0.358658	1.45867	0.544651
ZNF185 _ 613	10.7656	11.0158	13.7917	0.359237	0.867929	-0.204351
LSR _ 332	8.66347	8.55989	7.33539	0.362824	1.09007	0.124418
GAB2 _ 409	8.01954	14.5787	8.51323	0.364898	0.694576	-0.525795
STAM2 _ 374	5.37285	6.15374	15.8027	0.3652	0.48941	-1.03088
HSP90AB1 _ 226	9.2279	8.96578	5.61047	0.367037	1.26616	0.340455
HSP90AB1 _ 255	9.54564	9.264	5.47417	0.369547	1.29536	0.373355
EGFR _ 1092	10.3899	14.2774	10.6568	0.36993	0.833381	-0.262952
GRB2 _ 209	14.6886	7.62103	14.2168	0.371384	1.34525	0.427875
PTPN11 _ 62	8.80893	8.4876	3.94888	0.371881	1.41663	0.502461
FRK _ 497	10.164	10.0865	8.97133	0.372752	1.06665	0.0930868
ENO3 _ 44	8.85389	8.99235	10.994	0.372966	0.885993	-0.174633
PALLD _ 641	7.17472	6.20012	7.11199	0.373214	1.07792	0.108257
PVRL2 _ 513	7.25957	11.9017	7.54914	0.374738	0.746455	-0.421873
MARCKS _ 170	4.9821	5.54254	14.5412	0.377606	0.496132	-1.0112
FUS _ 468	6.92137	17.3694	7.52008	0.37862	0.556168	-0.846408
PLEC _ 4611	5.00025	5.7282	17.8503	0.379121	0.424137	-1.2374
HSP90AA1 _ 385	9.29005	9.07364	5.39784	0.379923	1.28391	0.360546
SLC25A6 _ 81	9.88968	9.67687	5.87132	0.381948	1.27213	0.347248
STAM2 _ 371	2.5612	3.38199	18.9659	0.384189	0.229212	-2.12524
PRKCD _ 313	8.13109	7.96169	4.72274	0.384443	1.28206	0.358462
EGFR _ 1172	10.2598	10.3317	11.7903	0.386531	0.927562	-0.108485
SIGIRR _ 402	8.77615	8.87464	10.881	0.386671	0.88847	-0.170604
MAPKAPK3 _ 207	10.6518	10.5744	8.78948	0.390692	1.10017	0.137727
GTF2E2 _ 284	8.07931	8.11345	8.92768	0.391703	0.948213	-0.0767165
TBCB _ 98	8.22267	15.1378	8.50091	0.391703	0.695693	-0.523476
ZMIZ2 _ 103	8.54359	12.5071	8.69995	0.392308	0.805731	-0.311629
PTK2 _ 861	5.28654	5.57183	12.5987	0.392641	0.581881	-0.781205
RAVER1 _ 581	7.15799	7.2387	9.26532	0.39319	0.867423	-0.205192
TOM1 _ 386	8.65737	9.57375	8.69232	0.393315	0.947918	-0.0771653
SNAP29 _ 182	11.8009	8.36921	11.6771	0.394908	1.17736	0.235558
SND1 _ 908	8.87057	11.0055	8.94717	0.39505	0.889163	-0.16948
CTTN _ 384	7.3663	14.0708	7.55908	0.400525	0.681123	-0.554012
CTNND1 _ 208	8.85175	9.03393	15.3965	0.401232	0.72465	-0.464643
CTTN _ 141	10.8825	10.8256	8.73258	0.402268	1.11284	0.154244
KIF23 _ 949	7.89812	7.98018	11.6444	0.405793	0.804922	-0.31308
ALDOA _ 414	9.0083	8.51339	8.99805	0.4067	1.02885	0.0410296
PFKFB2 _ 466	8.05976	8.02988	6.465	0.408233	1.11208	0.153264
EPHA2 _ 594	8.59607	8.57164	7.26453	0.408534	1.08562	0.118524
ANK3 _ 883	8.435	13.849	8.52481	0.409882	0.754005	-0.407353
PLIN3 _ 95	8.27518	8.24305	6.29774	0.410144	1.1382	0.186757
PCBP1 _ 211	10.0347	4.67471	9.96238	0.412259	1.37114	0.455374
MAPK12 _ 185	5.78586	9.64527	5.83794	0.412262	0.747372	-0.420102
EGFR _ 1138	9.95708	9.92451	7.09384	0.413894	1.17016	0.226704
CFL1 _ 68	4.10797	17.3529	4.25678	0.414002	0.380197	-1.39518
ANK3 _ 1459	7.93134	7.95406	10.3481	0.415413	0.866712	-0.206376
EPS15L1 _ 229	8.78494	7.24314	8.77264	0.41651	1.09703	0.133609
EVI5 _ 692	11.9977	6.85811	12.0069	0.424041	1.27194	0.347036
CTTN _ 178	9.74337	12.4672	9.73296	0.425593	0.877776	-0.188075
CDK5 _ 15	8.60008	8.61452	6.00002	0.426924	1.17692	0.235018
SCAMP3 _ 53	5.01021	4.9319	14.8268	0.428791	0.50714	-0.979545
ZC3HAV1 _ 410	8.23597	14.4108	8.17291	0.430511	0.729372	-0.455274
SCAMP3 _ 85	5.36736	5.19762	20.0434	0.431552	0.425289	-1.23348
RPLP0P6 _ 24	9.31375	9.3719	5.48765	0.434347	1.25357	0.326044
ARHGEF2 _ 125	7.54678	7.44609	13.4032	0.435883	0.723936	-0.466065
ZYX _ 344	6.52941	6.49252	8.23807	0.439265	0.88651	-0.173791
POGZ _ 445	10.0276	10.1181	5.84688	0.439295	1.25621	0.329075
AHNAK _ 121	10.1344	10.1775	8.20777	0.439872	1.10244	0.140707
NCK1 _ 105	10.8371	10.9212	7.52959	0.442213	1.1747	0.232298
CRK _ 190	9.35673	6.75854	9.42315	0.442324	1.15646	0.209713
CAP1 _ 419	9.78917	9.92264	5.56747	0.446974	1.26393	0.337911
STAM2 _ 192	3.2689	2.83056	16.9228	0.447349	0.330972	-1.59522
HGS _ 524	2.58586	1.98029	19.9295	0.44951	0.236045	-2.08286
SNW1 _ 176	8.58427	9.96149	8.53066	0.452589	0.928423	-0.107146
RAVER1 _ 585	8.74311	8.66336	10.7841	0.452702	0.89915	-0.153367
WDR13 _ 117	2.20298	1.70299	14.4924	0.45394	0.27205	-1.87805
AP2B1 _ 328	6.84293	4.53616	6.94313	0.456055	1.19222	0.253652
ZFYVE9 _ 520	3.3749	2.77959	16.0098	0.458876	0.359235	-1.477
MAPK13 _ 182	6.53305	11.3165	6.2917	0.461437	0.742046	-0.43042
EPS15 _ 849	5.05619	4.36845	18.4307	0.462178	0.443541	-1.17286
OCLN _ 315	11.3425	15.1984	11.1423	0.462558	0.861217	-0.215552
MUC1 _ 1238	9.80232	10.0453	5.20404	0.463261	1.28561	0.362451
MFSD6 _ 20	7.30013	7.02744	12.1956	0.465458	0.759519	-0.396841
PARD3 _ 386	8.86656	8.99783	6.72404	0.469719	1.12793	0.173673
SPTBN1 _ 2249	7.66355	3.03514	7.96977	0.47346	1.39275	0.477938
RAB7A _ 183	7.47126	6.96327	15.1151	0.473688	0.676796	-0.563208
EMD _ 105	9.32426	9.64703	4.46908	0.473705	1.32108	0.401719
FNBP1L _ 506	8.07483	11.0277	7.87707	0.474082	0.854264	-0.227246
OTUB1 _ 68	9.40099	4.87484	9.70591	0.474384	1.28951	0.36682
MARVELD2 _ 137	8.70994	17.9504	8.07058	0.475777	0.669454	-0.578943
UPF1 _ 1118	9.24718	9.38444	7.30862	0.47701	1.10791	0.147836
EGFR _ 995	8.94934	8.78881	11.2063	0.477255	0.895152	-0.159795
G6PD _ 549	8.64434	8.817	6.2818	0.478749	1.14504	0.195393
ALDOA _ 258	8.61981	8.92566	4.53059	0.480056	1.28116	0.357451
MAPK7 _ 221	7.60976	8.06684	7.5749	0.481188	0.973007	-0.0394772
ACTB _ 53	6.32224	5.802	12.7554	0.484686	0.681372	-0.553486
ATP1A1 _ 684	9.8197	10.0793	6.66474	0.485766	1.17292	0.230103
TRIM28 _ 541	3.9534	3.17166	12.4331	0.493299	0.50669	-0.980824
PIK3R1 _ 431	6.5942	5.81621	14.9375	0.494103	0.635471	-0.654103
CYSTM1 _ 64	10.5361	10.7955	7.76367	0.494328	1.13541	0.183214
AHNAK _ 61	14.0674	7.56781	14.6788	0.494725	1.26468	0.338772
C6orf132 _ 1067	8.64304	8.42455	10.8967	0.496915	0.894668	-0.160576
MYO6 _ 103	4.90585	3.08863	23.622	0.497023	0.367332	-1.44484
PLCG2 _ 1245	10.7959	9.94314	10.8797	0.497957	1.03693	0.0523117
HGS _ 289	3.41772	1.71206	20.4162	0.499486	0.3089	-1.69479
C18orf8 _ 430	6.62279	6.22432	10.4318	0.50272	0.795237	-0.330543
SSBP1 _ 101	10.0974	7.4163	10.378	0.502775	1.1349	0.182561
PNN _ 66	8.05866	7.56349	12.7368	0.503655	0.793945	-0.332889
ICK _ 159	5.69614	10.7927	5.14788	0.504961	0.714672	-0.484647
DSG2 _ 1013	8.22193	9.94308	8.03534	0.505593	0.914644	-0.128717
CRKL _ 251	8.5956	8.05139	13.4414	0.508537	0.79986	-0.32218
TES _ 251	9.02944	9.46358	5.2418	0.510284	1.22805	0.296364
MUC1 _ 1252	8.22565	7.97503	10.3968	0.510894	0.895462	-0.159296
ATIC _ 208	9.19742	11.9287	8.87194	0.513712	0.884342	-0.177324
CTNND1 _ 334	10.9179	9.64925	11.0711	0.514958	1.05383	0.0756387
DBNL _ 162	7.5048	12.5352	6.8893	0.516112	0.772716	-0.371991
PTK2 _ 576	5.64166	5.26631	8.70091	0.516365	0.807843	-0.307854
CHN2 _ 158	11.3915	8.98919	11.694	0.518799	1.10152	0.139498
HSP90AB1 _ 484	8.43222	7.14371	8.60025	0.522158	1.07117	0.0991865
LARP4B _ 718	10.0936	10.8103	5.24163	0.5351	1.25762	0.330693
LAPTM4A _ 230	8.00599	8.3392	5.76025	0.535591	1.13565	0.183514
TUBA1B _ 357	10.7398	11.6538	4.86812	0.541014	1.30007	0.378585
PLCG2 _ 818	6.35813	2.19291	7.03162	0.545486	1.37853	0.463128
STAT6 _ 641	9.38824	8.41737	15.3919	0.5455	0.78862	-0.342599
SPRY1 _ 89	8.98348	8.42849	12.4133	0.545575	0.862063	-0.214134
SNRPC _ 12	8.88081	9.10595	7.55323	0.551322	1.06618	0.0924457
TRPS1 _ 905	8.42154	8.76265	6.411	0.551377	1.11002	0.150588
CTTN _ 446	8.50721	11.5588	7.97711	0.554361	0.870929	-0.199372
SNTB2 _ 203	10.8982	7.63621	11.4698	0.555488	1.14081	0.19006
NUCKS1 _ 181	8.21933	8.92298	4.28291	0.558071	1.2448	0.315912
SIPA1L3 _ 1411	9.96561	5.78419	10.7372	0.562301	1.20639	0.270698
TWF2 _ 309	6.99464	7.19935	5.88819	0.562661	1.0689	0.0961283
SHB _ 268	8.98304	8.35154	12.329	0.565387	0.868744	-0.202997
RAI14 _ 222	8.27363	8.12032	9.08512	0.565521	0.961745	-0.0562735
TNS3 _ 855	9.74296	8.06795	18.5967	0.565717	0.730778	-0.452495
PKP2 _ 631	8.85554	8.60903	10.1501	0.566626	0.944134	-0.0829371
TYK2 _ 292	7.66093	10.2965	7.15627	0.567394	0.877906	-0.187862
CHAMP1 _ 204	9.60516	10.2901	6.03849	0.567792	1.17649	0.234485
SNTA1 _ 175	10.5496	9.5034	15.9725	0.568447	0.828203	-0.271943
CRKL _ 207	8.642	10.0808	8.36142	0.569972	0.9372	-0.0935718
ROCK2 _ 722	9.59654	10.0821	7.13823	0.571801	1.11456	0.156471
TNS3 _ 780	7.54731	5.52553	17.4201	0.577071	0.657844	-0.604182
LYN _ 194	9.20387	19.7161	7.02811	0.578657	0.688288	-0.538916
OCLN _ 443	9.27902	3.48235	10.49	0.580058	1.3282	0.40947
CDK3 _ 15	8.17819	8.89713	4.76787	0.581434	1.19695	0.259369
PGK1 _ 203	9.7018	11.0166	3.66065	0.586364	1.32202	0.402739
RABGEF1 _ 673	6.98552	3.95551	7.6533	0.588334	1.20349	0.26722
GAB2 _ 293	9.69065	9.34118	11.2418	0.591862	0.941618	-0.0867862
ANXA2 _ 206	8.62927	8.11032	10.9189	0.592832	0.906952	-0.140902
ANO1 _ 981	8.2391	9.69918	7.90047	0.596601	0.93628	-0.0949877
RAB35 _ 5	9.47616	8.84434	12.156	0.599338	0.902476	-0.148039
RETSAT _ 486	9.81538	5.9027	10.7389	0.599521	1.17962	0.238325
ANXA2 _ 48	9.13946	5.4276	10.019	0.600182	1.18336	0.242892
ITGB1 _ 783	9.33864	9.83731	7.2891	0.604697	1.09055	0.125062
PKP4 _ 281	10.1157	10.6159	8.11367	0.60936	1.08018	0.111268
CBL _ 141	8.43342	4.15267	9.50423	0.609536	1.23504	0.30456
ANXA1 _ 39	11.5488	13.1692	5.14963	0.611703	1.26087	0.334416
CTNND1 _ 296	9.37829	8.56918	12.3966	0.622117	0.894628	-0.16064
ITSN2 _ 553	6.03796	2.1072	7.09198	0.622174	1.31272	0.392555
STAP2 _ 256	11.4849	11.8375	10.1892	0.624933	1.04282	0.0604851
USP43 _ 835	8.56497	7.49589	12.456	0.626778	0.858564	-0.220002
TNS1 _ 798	9.06088	6.14205	19.5678	0.628889	0.704855	-0.504601
GAPDH _ 184	8.04222	8.93194	4.85994	0.630126	1.16623	0.221847
ATP1A1 _ 10	10.5655	11.1889	8.39147	0.635088	1.07919	0.109949
SCRIB _ 1360	9.06502	9.35795	8.06095	0.638513	1.04083	0.0577287
ICA1 _ 262	9.03542	7.81637	13.1961	0.639371	0.860004	-0.217584
DDR1 _ 520	8.29439	7.91483	9.57492	0.641715	0.948486	-0.0763016
SNAP29 _ 189	12.0071	7.37684	13.3832	0.642255	1.15675	0.210076
CRKL _ 105	8.27981	7.22943	11.746	0.646239	0.872686	-0.196465
DDR1 _ 802	11.9511	13.4303	7.10406	0.647695	1.16401	0.219107
EGFR _ 991	8.99383	6.97115	9.61167	0.647889	1.08472	0.117318
EPB41L1 _ 343	8.16831	7.76967	9.43959	0.653394	0.949292	-0.0750765
TNS1 _ 366	9.2226	5.56955	10.4103	0.661174	1.15428	0.206993
PEAK1 _ 635	7.03729	2.60672	20.0618	0.671213	0.620886	-0.687601
FUBP1 _ 60	9.45311	12.537	8.39549	0.673056	0.903201	-0.146882
PABPC1 _ 291	8.43946	5.93451	9.30476	0.674698	1.10759	0.147429
PIN1 _ 23	7.40582	2.77779	9.0185	0.676693	1.25562	0.328398
RAB1A _ 112	5.95686	3.53077	12.8933	0.67755	0.725381	-0.463189
DDX17 _ 279	9.49448	10.181	7.56562	0.681596	1.07	0.0976168
AHNAK _ 160	9.79515	12.3653	8.86872	0.684561	0.922589	-0.11624
MPP5 _ 243	7.64391	8.30451	5.81711	0.68532	1.08258	0.114477
BAIAP2L1 _ 274	9.67627	9.48483	10.2036	0.686275	0.982942	-0.0248211
LUZP1 _ 799	9.78731	7.70352	10.5514	0.688603	1.0723	0.100703
CLINT1 _ 159	7.33707	6.65856	9.17914	0.689695	0.926532	-0.110087
PTTG2 _ 165	9.7376	11.9454	3.88412	0.69541	1.23031	0.29902
CTNND1 _ 288	9.00112	10.4729	8.44356	0.696475	0.951671	-0.0714648
TNK2 _ 905	9.80623	13.2618	8.48388	0.698945	0.901904	-0.148955
TNS1 _ 1326	9.47573	11.4533	8.71282	0.700926	0.939765	-0.0896284
HNRNPA2B1 _ 336	8.68382	11.5965	7.54122	0.705084	0.907508	-0.140018
OPHN1 _ 370	10.9952	7.43169	12.446	0.714486	1.10628	0.145718
IQGAP1 _ 1117	11.8441	5.55097	14.4065	0.714513	1.18693	0.247231
EHD1 _ 453	7.63807	5.38934	13.1341	0.715746	0.824691	-0.278075
EPN2 _ 17	7.36274	3.98709	8.74756	0.716427	1.15633	0.209555
CTNND1 _ 865	9.47399	10.1537	7.83422	0.719123	1.05337	0.0750114
STXBP3 _ 521	10.7051	12.2958	10.041	0.720971	0.958518	-0.0611223
GGT6 _ 10	7.85026	6.81638	10.2692	0.727118	0.918934	-0.121967
HIPK3 _ 359	8.81394	10.1962	5.59753	0.728561	1.11613	0.158508
STAT3 _ 704	11.8583	9.52921	12.8677	0.730783	1.05893	0.0826034
SLC9A1 _ 683	9.64047	12.9997	8.18327	0.731051	0.910211	-0.135727
APLP2 _ 750	8.97392	9.95166	6.7359	0.732945	1.07552	0.105037
VPS45 _ 318	5.62852	4.56704	8.05411	0.733397	0.891918	-0.165016
ARHGEF5 _ 656	11.3468	22.7109	6.36894	0.733657	0.780393	-0.357728
ANKS1A _ 455	9.69572	9.31987	10.552	0.734201	0.975823	-0.0353081
IFNAR1 _ 527	7.86244	16.1551	4.19311	0.73637	0.772789	-0.371853
STAM2 _ 291	6.65335	5.25458	9.73484	0.74332	0.88774	-0.171791
PTRF _ 308	7.26788	4.33142	13.6972	0.745011	0.806261	-0.310681
HSP90AA1 _ 406	9.64802	7.86235	10.4678	0.746427	1.05269	0.0740869
SLC1A3 _ 523	3.46366	2.42406	5.72573	0.746725	0.85	-0.234466
EPB41 _ 660	9.55922	15.5433	6.78779	0.748858	0.856136	-0.224087
BROX _ 21	5.89506	5.03165	7.75006	0.750242	0.92242	-0.116504
USP9X _ 2556	9.15378	10.4729	8.53624	0.751853	0.963092	-0.0542539
SLC12A4 _ 61	8.40526	6.13176	13.1641	0.75755	0.871196	-0.19893
S100A11 _ 32	8.36353	4.62875	10.161	0.759638	1.13099	0.177588
PDZK1IP1 _ 83	7.2182	8.70203	4.16029	0.761976	1.12238	0.166559
DSC2 _ 853	10.1176	9.229	11.9403	0.763332	0.95588	-0.0650989
NUP62 _ 422	8.80152	11.8018	7.31683	0.767592	0.920727	-0.119155
RABEP2 _ 133	6.18312	3.43143	11.7327	0.768167	0.815492	-0.294257
EGFR _ 1166	9.83696	10.5541	8.41676	0.773434	1.03706	0.0525025
LMO7 _ 185	7.45893	5.9748	8.20861	0.773553	1.05178	0.0728359
GIGYF2 _ 26	7.3834	8.84251	4.5368	0.777834	1.1037	0.142353
RBM3 _ 155	8.62242	13.8233	5.94163	0.779478	0.872499	-0.196775
SGMS2 _ 59	8.49962	10.794	7.30152	0.783314	0.939417	-0.090163
TENC1 _ 493	8.17507	8.97509	6.64982	0.784636	1.04641	0.0654547
STAT3 _ 705	11.9847	8.54723	13.7985	0.786397	1.07267	0.101201
TRIP12 _ 859	12.2485	13.0078	10.8141	0.787367	1.02834	0.0403174
FUBP1 _ 58	10.9281	13.3867	6.31682	0.789519	1.10925	0.149589
POLDIP3 _ 236	8.67674	9.39568	7.3462	0.793531	1.03653	0.0517643
DSC2 _ 839	10.0832	7.21574	11.642	0.795369	1.06939	0.0967935
ACTB _ 198	7.34108	4.13444	9.08916	0.796213	1.1103	0.150949
ABL2 _ 568	8.32736	7.6975	9.45352	0.804026	0.971063	-0.0423635
HNRNPM _ 64	9.54664	11.4053	6.22756	0.804401	1.08283	0.114802
SLC1A5 _ 524	9.51402	10.8287	8.74131	0.819421	0.972305	-0.0405188
LSR _ 372	8.98973	9.74323	7.71492	0.821193	1.02986	0.0424486
ZRANB2 _ 102	8.62653	9.61865	6.95862	0.823186	1.04077	0.0576464
HNRNPAB _ 270	10.6721	13.4784	5.9726	0.824421	1.09733	0.133996
KIF23 _ 769	7.82211	6.47158	10.0598	0.827781	0.946333	-0.0795797
PVRL1 _ 468	10.1327	12.2558	6.62159	0.828386	1.07353	0.102359
STMN1 _ 38	8.22868	10.1854	5.08265	0.837393	1.07789	0.108213
OSBPL11 _ 189	8.69501	7.75467	10.1946	0.840004	0.968841	-0.0456689
LSR _ 328	6.30015	7.8868	5.29583	0.843047	0.955827	-0.0651791
PTK2 _ 938	8.29323	9.25204	7.67852	0.847183	0.979676	-0.029624
TNKS1BP1 _ 897	11.6918	14.4802	7.44362	0.854862	1.06658	0.0929965
HGS _ 132	4.70753	3.07719	5.77811	0.854999	1.06321	0.0884312
SEC16A _ 1031	7.30425	9.76961	3.55061	0.855066	1.09672	0.133191
STAT5A _ 694	7.92755	4.77872	12.6447	0.860396	0.909987	-0.136083
UBC _ 59	6.95079	4.48797	8.59879	0.861199	1.06226	0.0871406
RAC1 _ 79	8.48579	9.09755	8.0764	0.861215	0.988216	-0.0171019
SHB _ 114	9.2887	8.9414	9.79916	0.866695	0.991294	-0.0126156
RBMX _ 206	8.47898	12.9675	5.40936	0.868406	0.922787	-0.11593
YBX1 _ 208	9.87158	10.9042	9.16182	0.870095	0.983912	-0.0233994
TOP1 _ 125	9.51126	9.1561	10.0265	0.871006	0.991652	-0.0120936
ZNF185 _ 195	13.1441	15.1425	10.2499	0.871606	1.03528	0.0500182
RPS10 _ 12	9.42827	11.2264	6.83977	0.873622	1.04375	0.0617721
MYH9 _ 1943	7.46143	8.62442	6.64902	0.875484	0.977046	-0.0335009
CLDN10 _ 207	6.72381	4.91443	7.98785	0.87551	1.04227	0.0597243
KIAA1522 _ 1030	8.58558	9.15843	7.76626	0.875788	1.01456	0.0208571
HMGA1 _ 36	8.2802	9.46113	6.62089	0.881739	1.02975	0.0422887
SSBP1 _ 73	9.66667	11.2282	7.52268	0.889536	1.03106	0.0441311
OSBP _ 764	7.35827	5.03117	9.061	0.891097	1.04431	0.0625435
EPN2 _ 186	7.57861	4.43966	11.8662	0.891281	0.929556	-0.105387
GPR126 _ 1172	7.19767	7.64416	6.59074	0.892918	1.01127	0.0161706
IQGAP1 _ 1114	9.10401	4.95064	12.1857	0.895829	1.06254	0.0875169
ZNF185 _ 85	10.4007	11.4291	9.03151	0.899964	1.01666	0.023839
SCAMP3 _ 35	8.69078	6.91108	11.0232	0.905386	0.969182	-0.0451604
WASL _ 256	7.62891	8.43054	7.01395	0.907221	0.987913	-0.0175438
APP _ 762	7.642	10.059	4.50935	0.909193	1.04912	0.0691845
CLDN3 _ 214	9.02871	11.8646	6.83405	0.910235	0.965709	-0.0503396
DDR1 _ 484	9.98556	13.3809	7.35637	0.910438	0.963055	-0.0543103
RASA3 _ 822	11.8098	16.7189	7.99193	0.911923	0.955839	-0.0651611
PPP1R14B _ 29	9.02997	9.9375	8.31809	0.914883	0.989283	-0.0155447
PARD3 _ 489	9.81834	12.2601	7.89865	0.915655	0.9741	-0.0378576
EIF4B _ 211	9.64999	8.5119	11.0975	0.915682	0.984221	-0.0229461
SET _ 146	7.91943	7.43305	8.53407	0.9179	0.991967	-0.0116364
CASKIN2 _ 336	11.6828	7.58176	14.9492	0.920155	1.03704	0.0524735
RAB11FIP5 _ 344	7.41692	5.53047	9.7485	0.925586	0.970866	-0.0426552
PDZK1IP1 _ 85	6.6129	8.45206	4.34141	0.925834	1.03379	0.0479485
SPRED1 _ 294	10.1744	13.0245	7.86183	0.926572	0.974263	-0.0376174
TUBA1B _ 272	8.25526	13.082	4.32051	0.928199	0.948746	-0.0759069
ROCK2 _ 1318	12.9688	15.3163	11.043	0.930396	0.984003	-0.0232652
APLP2 _ 755	8.94468	11.9679	5.27902	0.932238	1.03725	0.0527654
MYO6 _ 1182	10.2245	12.0891	8.65478	0.939425	0.985791	-0.0206457
DDX6 _ 473	6.21599	1.6366	11.6463	0.939998	0.935939	-0.0955136
SH2B1 _ 55	9.33042	10.2528	8.53393	0.948265	0.993297	-0.00970319
GDI2 _ 203	9.69116	13.3571	5.46176	0.949596	1.02994	0.0425655
SHB _ 10	9.90896	12.5997	6.85873	0.955765	1.01847	0.0264105
DHX9 _ 132	9.37302	10.5988	8.27938	0.959748	0.993	-0.0101337
TUBA1B _ 282	10.1656	12.436	8.09423	0.967606	0.990306	-0.0140533
SPRY3 _ 27	11.3022	15.9595	7.04843	0.967995	0.982461	-0.0255279
GORASP2 _ 222	6.62308	3.6566	9.8662	0.968514	0.979543	-0.0298194
CEBPB _ 139	8.19818	11.2697	5.37937	0.969674	0.98482	-0.0220683
ACTN4 _ 212	8.33408	4.94403	11.4522	0.970469	1.01658	0.02373
PHACTR2 _ 590	9.86802	6.94166	12.5658	0.971267	1.01172	0.0168103
TRIM29 _ 93	12.3147	17.3829	6.85617	0.97379	1.0161	0.0230465
TUBA1C _ 282	10.3826	12.8494	8.06639	0.977747	0.992801	-0.010423
EPN1 _ 540	7.04555	6.25789	7.87767	0.980595	0.996855	-0.00454483
ENSA _ 43	9.93057	6.85218	12.8501	0.981276	1.00806	0.0115853
ZNF185 _ 652	13.7952	16.2043	11.4987	0.983099	0.99594	-0.00586997
SND1 _ 329	6.72511	2.12472	11.1182	0.983704	1.01565	0.0224073
EPN1 _ 128	5.73944	1.36832	10.3111	0.984146	0.982831	-0.0249854
SHB _ 8	10.2392	13.6943	6.913	0.986559	0.993744	-0.0090534
HCFC1 _ 666	7.00787	5.47819	8.48342	0.987264	1.00388	0.00558289
HNRNPL _ 92	11.9775	17.1151	7.01345	0.987851	0.992806	-0.0104159
APP _ 757	8.66419	11.0052	6.26063	0.990685	1.00362	0.00521322
CDCP1 _ 707	6.38808	7.20231	5.55753	0.992987	1.00128	0.00184322
CMPK1 _ 49	10.4925	6.5604	14.4005	0.997832	1.00115	0.00165385
