# Supplementary material for: Time-resolved phosphoproteomics reveals scaffolding and catalysis-responsive patterns of SHP2-dependent signaling
Source: eLife journal article supplement (doi:10.7554/elife.64251), 2021-03-23
Supplement: supp [file elife-64251-supp-v1.zip › elife_poa_e64251_Figure_2_figure_supplement_2_source_data_2.xlsx]

## Sheet: Sheet1
pY site	SHP099_10	DMSO_10	Washout_10	p value	FC	log2FC
RAB7A _ 72	22.3207	6.05795	8.81903	0.00849579	3.0007	1.5853
OCLN _ 420	13.8953	7.03179	6.13345	0.00375164	2.11091	1.07786
CRK _ 136	17.027	7.89384	9.34663	0.00738339	1.97524	0.982028
EPN1 _ 128	11.4348	4.6335	10.8779	0.35986	1.47437	0.560103
DDX6 _ 473	10.5604	3.04524	12.4755	0.612846	1.3608	0.44446
PEAK1 _ 1107	5.99638	5.84951	5.9348	0.13446	1.01769	0.0252957
SND1 _ 329	9.78802	4.81233	10.5428	0.538063	1.27489	0.350369
PLCG2 _ 818	16.2436	1.00964	6.27537	0.0409902	4.45945	2.15687
DNAJB1 _ 176	14.0053	6.81435	7.55893	0.00296774	1.94879	0.962582
ITSN2 _ 553	12.2011	5.13753	7.35086	0.0328242	1.95398	0.966418
HNRNPA2B1 _ 131	18.3021	5.78244	7.13592	0.00324942	2.8335	1.50259
UPF3B _ 117	15.4252	6.87544	8.18788	0.00684044	2.04805	1.03425
PIK3R2 _ 453	13.8743	7.351	9.89254	0.0538477	1.60922	0.686364
PEAK1 _ 635	5.91467	2.3701	20.5506	0.6039	0.516099	-0.954281
PIN1 _ 23	10.6569	4.88398	13.6026	0.7765	1.15294	0.205313
OCLN _ 443	16.4657	5.35747	10.1313	0.067418	2.12615	1.08824
SERINC5 _ 345	11.2915	9.68836	5.45515	0.220925	1.49127	0.576539
DLG5 _ 429	15.0276	8.47711	7.22196	0.00755725	1.91446	0.936938
TLN1 _ 127	10.3367	4.32279	9.45449	0.31116	1.50055	0.585489
SPTBN1 _ 2249	13.1672	5.1416	7.43565	0.026698	2.09381	1.06613
KIF23 _ 582	14.9735	7.96	7.24917	0.00231818	1.96901	0.977473
RAB10 _ 6	11.6478	6.59721	7.38638	0.00710571	1.66593	0.736326
TEC _ 228	14.5309	6.65417	7.74231	0.0054604	2.01867	1.01341
DLG3 _ 673	15.067	7.6181	7.49196	7.04833e-05	1.9943	0.995886
PAK2 _ 453	11.7793	6.57887	8.76883	0.0643476	1.53499	0.618225
PTPN9 _ 333	12.0831	5.74516	6.65219	0.00588754	1.9493	0.962955
CSNK1A1 _ 322	9.12567	5.48695	4.60063	0.0115824	1.80929	0.855422
EMSY _ 173	14.1261	9.97375	4.26693	0.13347	1.9839	0.988342
UNC93B1 _ 585	11.7167	12.1582	6.17	0.483723	1.27854	0.354497
OCRL _ 133	13.2529	9.21295	6.38693	0.0610605	1.69911	0.764777
BAIAP2 _ 164	16.4015	6.04393	9.17697	0.0303168	2.15513	1.10778
PIK3R2 _ 467	13.9936	7.12282	6.77483	0.000609457	2.01381	1.00992
PEAK1 _ 531	11.1072	8.30512	7.45255	0.0169918	1.40976	0.495446
STAP2 _ 250	14.9485	11.0177	10.279	0.00729665	1.40383	0.48937
PCBP1 _ 211	9.43267	7.99369	13.3368	0.689852	0.884432	-0.177177
CKS2 _ 17	12.8589	8.50627	5.78343	0.052349	1.79975	0.847794
IQGAP1 _ 1117	14.665	12.2318	12.2419	4.25721e-06	1.19843	0.261146
GNAI3 _ 61	14.683	6.84457	8.38105	0.0116017	1.92872	0.947645
FNBP1L _ 566	12.2046	3.45123	7.6333	0.085992	2.20209	1.13888
PIK3R1 _ 470	12.3934	6.91528	6.92973	1.74509e-06	1.7903	0.840204
TRIP10 _ 590	13.9954	10.37	10.3615	1.36232e-06	1.35016	0.433127
SEC61A1 _ 276	9.57141	6.05863	7.05185	0.0260548	1.46012	0.546083
SH3PXD2B _ 226	10.6997	6.59654	7.14421	0.00507475	1.55736	0.639106
PIK3R3 _ 184	12.2593	5.95822	7.34581	0.0149663	1.84295	0.882019
CBL _ 141	12.5916	4.32792	8.30434	0.0874151	1.99357	0.995351
SH3PXD2B _ 855	14.8098	9.67782	9.76204	6.84512e-05	1.52366	0.607536
EXOC4 _ 247	9.17578	8.07761	8.53604	0.0630712	1.10461	0.143533
ZC3HAV1 _ 77	13.5346	7.67226	6.34473	0.0101869	1.93118	0.949479
HGS _ 289	7.71232	5.39708	21.2644	0.552246	0.578537	-0.789519
ABI2 _ 183	13.9986	9.81352	3.94992	0.135939	2.03418	1.02444
SRRM1 _ 769	13.1359	10.9421	4.79735	0.228651	1.66918	0.739137
PSMD9 _ 41	12.9716	8.19309	7.1466	0.00960007	1.69125	0.758091
CAP1 _ 31	12.9886	9.31361	7.15892	0.047742	1.577	0.657183
STX4 _ 251	15.9579	7.6434	8.69524	0.00452864	1.95339	0.965982
OTUB1 _ 68	12.2962	10.6464	10.2447	0.0115733	1.17718	0.235329
GRB2 _ 209	11.8477	10.7983	11.4728	0.169134	1.06395	0.0894336
ARHGAP35 _ 1105	12.8814	7.35015	6.29448	0.00750362	1.88813	0.916954
CAPRIN1 _ 78	10.0095	5.20502	5.49487	0.000966009	1.87096	0.903776
TJP3 _ 188	11.354	8.19593	5.70774	0.0714171	1.63324	0.707738
PACSIN3 _ 418	14.566	7.87509	9.6543	0.0227166	1.6619	0.73283
PIK3R2 _ 464	13.1828	6.41857	6.45326	6.61064e-06	2.04832	1.03444
PIK3R2 _ 460	12.7488	9.19148	7.2182	0.0440548	1.55381	0.635811
AHNAK _ 61	9.68811	6.74474	14.2453	0.84959	0.923115	-0.115417
CPNE2 _ 411	10.4837	8.96177	7.08393	0.119945	1.30673	0.385956
CSK _ 18	9.75654	5.68864	8.58447	0.212093	1.36712	0.451141
EPN2 _ 17	11.1446	5.81156	9.40796	0.188247	1.46451	0.550416
IQGAP1 _ 1114	12.429	8.17517	14.124	0.709011	1.11475	0.156718
VTI1B _ 68	10.6275	7.15553	9.14953	0.131105	1.30359	0.382487
RAPH1 _ 366	12.4517	7.55526	7.37043	0.000342984	1.66849	0.738544
XRCC1 _ 453	13.7706	7.84715	4.666	0.0420058	2.20098	1.13814
GORASP2 _ 222	6.82978	5.68949	10.5642	0.647814	0.840397	-0.250857
S100A11 _ 32	10.7298	6.87134	10.1105	0.300986	1.26368	0.337628
RABEP2 _ 133	8.70559	7.61754	15.263	0.548618	0.760959	-0.394109
EIF1 _ 79	12.7404	7.74177	7.47846	0.0006579	1.67414	0.743422
ZFP91 _ 83	14.5027	9.51494	3.22214	0.122688	2.27724	1.18729
TJP2 _ 292	10.1004	7.0621	10.1968	0.447067	1.17046	0.22707
EPN3 _ 393	12.794	12.1966	4.21581	0.369194	1.55906	0.640675
OTUD5 _ 64	11.847	9.44142	5.49599	0.156658	1.58622	0.665591
ZFP91 _ 85	11.7868	9.18983	4.55668	0.167984	1.71488	0.778107
HMGA1 _ 44	10.8301	9.08187	4.67705	0.214708	1.57426	0.654678
ACTB _ 198	10.8591	7.52505	8.72366	0.0448211	1.33661	0.418575
WRNIP1 _ 500	9.85584	10.596	4.61461	0.530259	1.29591	0.37397
RABGEF1 _ 673	8.11413	5.75533	7.594	0.25789	1.21566	0.281741
CFL1 _ 140	11.2029	7.09028	5.99726	0.0134812	1.712	0.775683
EVI5 _ 692	11.0856	9.48468	10.2619	0.0892123	1.12279	0.167083
TNK2 _ 938	15.6379	12.7885	6.29818	0.201162	1.63862	0.712479
MICALL1 _ 744	10.4385	9.83001	9.58188	0.027507	1.07547	0.104968
VAV2 _ 442	11.277	9.51818	7.7857	0.0938195	1.30341	0.382289
SIPA1L3 _ 1411	12.4937	10.4956	11.6927	0.144322	1.12616	0.171407
SPTAN1 _ 1020	12.1517	9.44333	5.00143	0.156652	1.68251	0.750615
ERRFI1 _ 394	13.8274	12.9286	7.07578	0.321247	1.38243	0.467211
EPN2 _ 186	7.0295	5.43001	18.831	0.526002	0.579489	-0.787147
DLG1 _ 782	12.1069	8.10912	5.72732	0.0488507	1.75	0.807358
CTNND1 _ 600	12.9783	8.02973	9.91378	0.0510827	1.44658	0.532642
DYNLL1 _ 65	10.3698	6.68142	6.78248	0.000192868	1.54038	0.623286
RAB1A _ 112	10.0799	3.22769	7.05678	0.123176	1.96021	0.971009
ACTN4 _ 212	9.08449	4.71039	10.8782	0.716326	1.16553	0.220986
ANXA2 _ 48	14.188	6.58633	8.28429	0.0154414	1.9082	0.932209
AKAP2 _ 1009	13.0474	9.32669	6.0137	0.0832245	1.70105	0.766427
EPS8L1 _ 526	9.56371	6.46978	7.40194	0.0300468	1.37888	0.463495
PTRF _ 308	8.4445	6.79146	12.844	0.694479	0.860128	-0.217377
CLTC _ 1096	11.9846	10.3842	4.68161	0.258845	1.59097	0.669905
RAB11FIP1 _ 435	10.4243	7.41652	6.68144	0.0116502	1.47884	0.564469
RETSAT _ 486	12.2583	8.68183	10.7483	0.132932	1.26178	0.335458
MPRIP _ 450	11.9519	9.43977	4.87715	0.170404	1.66962	0.739519
STAT5A _ 694	13.6483	9.22648	11.5783	0.110002	1.31204	0.391809
TNS1 _ 366	8.79812	5.85294	9.50049	0.601273	1.14608	0.196705
CHAMP1 _ 282	12.7866	10.7406	4.93461	0.230349	1.63144	0.70615
CCNYL1 _ 105	10.8415	9.57462	7.63532	0.147482	1.25992	0.333328
AMOTL1 _ 691	12.7185	9.21961	6.03291	0.0855314	1.66772	0.737879
PIK3R1 _ 452	10.7634	7.48066	6.25582	0.02384	1.56712	0.648117
MARVELD2 _ 469	12.4215	5.74201	6.56749	0.00430972	2.0182	1.01307
MYO1D _ 435	11.0927	6.25937	6.54423	0.00092069	1.73274	0.793055
SNAP29 _ 189	10.9637	10.519	11.487	0.942755	0.996433	-0.00515526
ZNF579 _ 483	11.439	8.74187	5.40582	0.120243	1.61708	0.693395
KIAA1217 _ 1044	11.4587	8.69029	5.72599	0.103121	1.58969	0.668746
NUMA1 _ 169	11.8208	10.6882	5.10616	0.295005	1.49684	0.581918
ANXA2 _ 256	11.1007	5.99958	6.49889	0.0026377	1.77633	0.8289
EPPK1 _ 1331	9.5954	8.17196	4.7559	0.208194	1.48445	0.569932
RBM17 _ 222	10.5307	9.59359	6.63904	0.243807	1.29747	0.3757
RALGPS2 _ 278	13.6447	9.06289	8.40739	0.00442711	1.56205	0.643438
HNRNPA3 _ 145	11.4799	5.784	6.5534	0.00520544	1.861	0.896076
PIK3R1 _ 467	11.6758	7.61022	5.95932	0.0273208	1.72088	0.783147
HNRNPA2B1 _ 331	14.3547	9.45315	3.7233	0.113395	2.17883	1.12356
CCDC97 _ 212	11.6925	8.86164	4.27948	0.154898	1.77952	0.83149
NUP188 _ 1523	12.6002	8.82412	5.94755	0.0683716	1.706	0.770615
CMPK1 _ 49	12.6203	6.96503	9.42794	0.0695065	1.53973	0.622673
SLC12A2 _ 275	8.62352	7.10174	6.87637	0.00471954	1.23386	0.30318
ERBB3 _ 1307	13.0095	12.1052	5.24829	0.333673	1.49935	0.584338
CRK _ 108	12.868	7.63148	7.12841	0.0020941	1.74364	0.802103
MYO6 _ 103	5.74136	3.81765	23.9171	0.503649	0.414019	-1.27223
PRDX6 _ 89	11.7951	8.00901	7.11869	0.0108882	1.55941	0.640997
ACLY _ 481	13.1764	9.24429	5.08233	0.101807	1.83942	0.879253
SPTBN1 _ 2102	11.4161	7.13892	3.99937	0.0651177	2.04989	1.03555
TCOF1 _ 906	12.2328	10.3957	4.64658	0.242859	1.62647	0.70174
ANXA2 _ 42	14.1804	5.49013	13.0376	0.322447	1.53072	0.614214
CTNNB1 _ 489	11.2391	9.34998	5.24478	0.194785	1.54016	0.623082
ERP29 _ 66	12.5963	10.5793	3.31215	0.260174	1.81353	0.858804
ZC3H18 _ 398	12.3028	9.95907	4.5452	0.203054	1.69644	0.762508
HNRNPU _ 271	10.8886	9.53853	6.10098	0.216101	1.39245	0.477628
EPHB4 _ 614	12.7341	10.0254	3.85305	0.201217	1.83509	0.875849
RFC1 _ 156	12.4545	11.8723	4.39993	0.367176	1.53077	0.614255
SLC25A5 _ 191	11.3202	8.88626	5.45835	0.13661	1.57832	0.65839
CYCS _ 98	11.9279	8.72255	5.09415	0.109573	1.72659	0.787929
PTPLAD1 _ 316	11.2309	8.57532	5.73481	0.103004	1.56964	0.650431
PTPRA _ 271	11.7634	8.56832	7.41714	0.0225177	1.47176	0.557544
SRC _ 222	10.3308	7.94409	4.71432	0.131489	1.63225	0.706862
ACTN4 _ 265	12.6787	8.14197	5.3731	0.0505571	1.87624	0.907843
AKAP2 _ 915	10.0161	11.5542	7.80275	0.873733	1.03489	0.0494724
CEP55 _ 284	11.4004	11.5621	7.77389	0.456938	1.17919	0.237797
UBC _ 59	11.3378	7.88711	8.90268	0.0285041	1.35056	0.433561
PFKP _ 386	9.30185	9.12193	5.78379	0.383338	1.24809	0.319724
STMN1 _ 16	12.2066	9.48665	3.94259	0.186086	1.81791	0.862279
CASKIN2 _ 336	11.4198	9.82546	13.9474	0.841917	0.960743	-0.0577773
SRRM1 _ 616	12.515	9.65674	5.02824	0.154956	1.70446	0.769312
PEBP1 _ 181	10.5136	9.6987	11.4997	0.932916	0.991922	-0.0117019
SLX4 _ 467	12.0254	9.44162	5.36931	0.151347	1.62386	0.699428
CTTN _ 334	8.63252	10.1919	8.0928	0.67514	0.944233	-0.0827847
HGS _ 132	6.78874	4.16108	5.73424	0.144098	1.37211	0.456398
CALM1 _ 100	12.9964	8.46188	6.46856	0.0309674	1.74093	0.799859
SF3B1 _ 426	9.94509	8.5393	6.53497	0.138195	1.31948	0.399969
ANKRD39 _ 65	9.28626	6.17113	6.17833	1.33867e-06	1.50391	0.588722
BCS1L _ 181	13.2362	9.6846	5.40185	0.117141	1.75471	0.811231
PSMB2 _ 146	12.1121	9.24506	4.39347	0.160849	1.77616	0.828765
SRRM2 _ 2581	13.4259	9.44369	4.50833	0.120489	1.92457	0.944539
FRK _ 46	13.83	8.4125	4.0785	0.0728266	2.2144	1.14692
LMNB1 _ 138	11.4376	9.83977	5.49779	0.224696	1.49146	0.576721
LRRC16A _ 1339	10.3316	7.89368	8.02484	0.000763324	1.29806	0.376352
SOCS4 _ 30	12.0695	11.408	5.73811	0.342724	1.40785	0.493493
HSPD1 _ 227	11.4534	9.11716	5.57456	0.146242	1.55916	0.640771
ANXA4 _ 165	13.5253	8.09457	8.38192	0.000737651	1.64177	0.715255
AP2B1 _ 328	7.8928	8.34557	8.12654	0.0884865	0.958323	-0.0614168
PLEC _ 4642	8.04233	12.0119	8.85576	0.268895	0.770792	-0.375586
ARHGEF6 _ 488	9.83244	8.75676	6.20239	0.206777	1.31457	0.394592
TYK2 _ 433	10.3366	9.77865	6.61181	0.308876	1.26129	0.334903
HDLBP _ 437	10.2196	7.56593	6.51837	0.0261142	1.4512	0.537245
BCLAF1 _ 284	12.1099	9.76044	4.80244	0.190804	1.66312	0.733891
MPP7 _ 417	10.2025	5.30318	6.58635	0.0219617	1.71621	0.779226
AHCTF1 _ 1257	13.7747	8.16552	4.93708	0.0464849	2.10259	1.07217
DLG3 _ 808	10.9421	8.19618	6.78943	0.0391566	1.46035	0.546312
ZC3H18 _ 534	12.6789	9.34762	4.74265	0.134212	1.79966	0.847727
GAB2 _ 476	12.4533	7.47376	8.07986	0.0041732	1.60133	0.679273
HGS _ 216	9.93422	6.28992	4.37572	0.0406453	1.86284	0.897507
HNRNPK _ 114	13.2459	6.91995	6.87448	1.28255e-05	1.92048	0.941465
OPHN1 _ 370	10.8807	8.05562	11.39	0.559193	1.11909	0.162323
PRKCI _ 136	10.1178	8.54274	5.04833	0.197596	1.48889	0.574239
ACTA2 _ 71	8.81204	7.31575	6.15868	0.0697168	1.30796	0.387323
HSP90B1 _ 678	10.8095	8.27323	6.80075	0.047071	1.43419	0.520234
PRPF4B _ 849	11.8191	7.81078	4.72962	0.069178	1.88497	0.914542
TNS1 _ 798	5.98959	4.95842	18.3825	0.486467	0.513227	-0.962331
MYH9 _ 193	10.5825	7.75334	6.63523	0.0261609	1.47096	0.55676
IQGAP1 _ 1526	9.9921	6.50562	7.63683	0.0355121	1.41306	0.498828
STX4 _ 115	13.345	12.0612	12.7828	0.12482	1.0743	0.103403
FRK _ 99	9.15965	8.57408	9.11778	0.367763	1.03547	0.0502792
USP25 _ 69	8.54448	10.2367	6.1465	0.878885	1.04308	0.0608487
SRRM1 _ 402	12.4641	9.21952	4.41959	0.142997	1.82771	0.870035
GSK3A _ 282	10.0735	9.20942	3.65306	0.320152	1.56634	0.6474
OSBP _ 764	13.7394	5.36165	6.2136	0.0028574	2.37393	1.24728
FLNB _ 651	11.9955	9.87458	6.80123	0.140298	1.43867	0.524738
CRKL _ 127	9.47743	9.26985	4.88218	0.387915	1.33937	0.42156
SSBP1 _ 99	11.6314	8.81086	6.43876	0.0775699	1.52547	0.609255
CAST _ 288	9.98221	10.2196	8.4307	0.539024	1.07046	0.0982351
ENSA _ 43	9.27382	7.20212	15.7028	0.659242	0.809765	-0.304424
PSMA2 _ 97	7.76734	8.18984	6.80301	0.733707	1.03614	0.0512184
SH3PXD2B _ 230	11.111	9.71291	6.65175	0.195814	1.35792	0.4414
PKP4 _ 372	9.85674	12.7566	7.51009	0.92565	0.972705	-0.0399258
SRRM2 _ 1014	12.0399	8.37956	7.90344	0.00370834	1.47883	0.564458
LSM14A _ 216	12.0147	9.10384	4.58153	0.149444	1.75584	0.812163
RPS2 _ 133	11.6137	8.24185	4.96631	0.0923172	1.75857	0.814401
SNX16 _ 86	9.57656	8.94746	7.10386	0.234504	1.19324	0.254888
SRRT _ 544	11.1364	8.12229	5.40721	0.0844013	1.64624	0.719175
CCDC132 _ 571	11.4448	7.25729	9.35198	0.0955616	1.37813	0.46271
SLC1A3 _ 523	2.7631	3.0677	4.35578	0.27866	0.744423	-0.425806
SNTB2 _ 203	10.559	11.7432	10.8231	0.256155	0.935822	-0.0956938
YES1 _ 446	10.6373	9.26566	5.73907	0.2174	1.41785	0.503709
CTNNB1 _ 675	13.6013	7.97073	7.43827	0.00203218	1.76537	0.819969
MAPKAP1 _ 497	10.8235	7.98486	8.99732	0.0440183	1.27469	0.35015
PABPC1 _ 291	11.0729	8.83222	9.5025	0.0295675	1.20786	0.272454
PHACTR2 _ 590	12.755	7.94425	9.34509	0.0278313	1.47547	0.561179
SRRM2 _ 1003	12.0688	10.4223	5.13162	0.246177	1.55187	0.634009
GPRC5C _ 399	8.94347	8.67363	7.69962	0.260396	1.09245	0.127565
EHD1 _ 453	11.7787	4.97681	11.0254	0.338015	1.47213	0.5579
EPS8L2 _ 570	11.4104	12.7327	6.92684	0.640708	1.16079	0.215113
TNK2 _ 937	17.3067	14.4997	6.21722	0.235381	1.67078	0.740525
SNRNP70 _ 226	11.3352	8.76074	5.65079	0.117354	1.57307	0.653586
TLN1 _ 70	8.61939	6.34142	6.68135	0.00643839	1.32374	0.404621
SNAP29 _ 182	11.2473	10.5092	9.62558	0.11626	1.1172	0.159887
TOLLIP _ 83	11.1101	10.4534	10.4482	1.56172e-05	1.06308	0.0882518
ZFP36L1 _ 54	7.73463	8.21548	6.59843	0.724517	1.04424	0.0624515
SRSF11 _ 207	10.193	12.4129	7.31306	0.908864	1.03346	0.0474837
ARHGAP35 _ 1058	9.63232	12.0608	6.38035	0.898027	1.04465	0.0630257
STAT3 _ 705	10.954	8.67082	14.9695	0.809089	0.926717	-0.1098
CDKL5 _ 171	11.8563	9.71835	6.00196	0.16447	1.50841	0.593027
IRF2BP2 _ 360	12.061	9.42185	4.63159	0.17032	1.71644	0.779423
TRA2A _ 202	12.4034	8.15718	6.0992	0.0360066	1.74005	0.799127
DSC2 _ 839	9.78982	7.6561	11.5308	0.928512	1.02047	0.0292325
SRRM2 _ 1492	10.0795	10.0477	6.65332	0.415485	1.20706	0.271498
ARHGEF5 _ 1370	12.0822	9.86501	6.13408	0.160096	1.51036	0.594894
TMEM209 _ 98	12.0989	9.60493	4.32439	0.191259	1.73718	0.796748
CRK _ 190	10.9798	8.56918	9.4826	0.0505281	1.21648	0.282715
RHPN2 _ 639	12.3018	11.6673	7.34399	0.325084	1.29415	0.37201
MYO1E _ 961	12.5328	13.3032	5.36517	0.504899	1.34267	0.425107
ARHGEF6 _ 188	9.93854	8.32811	5.54011	0.163922	1.43328	0.519322
DDX3X _ 301	8.90277	10.5181	6.37778	0.846493	1.05384	0.075651
HDAC4 _ 465	9.49195	9.55159	4.46676	0.431785	1.35422	0.43746
FRK _ 132	11.405	11.2339	5.04485	0.401946	1.40122	0.48668
NPDC1 _ 249	10.4974	9.40268	6.10942	0.237862	1.35344	0.436636
SPDEF _ 329	9.70329	10.5102	6.14317	0.592837	1.16532	0.220728
PIK3R2 _ 428	12.0707	11.2705	10.0234	0.149838	1.13373	0.181075
FAM20B _ 138	12.2196	9.45564	4.25449	0.175215	1.78257	0.833957
SLC12A4 _ 61	6.93616	7.15649	12.7383	0.393442	0.697283	-0.520184
POLA2 _ 141	11.6666	8.35865	6.80162	0.0344316	1.5391	0.622082
CLDN10 _ 207	6.6549	4.85709	7.1418	0.624044	1.10925	0.149588
MIA3 _ 1678	10.2175	12.0757	5.16284	0.689214	1.18543	0.245415
TNS1 _ 1440	11.179	8.48782	8.16921	0.00310875	1.34226	0.42466
TNS3 _ 780	8.32128	5.80461	18.5869	0.606007	0.682309	-0.551503
SF3B4 _ 16	10.0419	6.9077	6.16462	0.0110461	1.53636	0.619519
SSBP1 _ 101	8.31346	8.90287	10.5483	0.228225	0.854801	-0.226339
SRSF9 _ 211	10.8849	8.48403	5.77965	0.108996	1.52624	0.609978
GMDS _ 323	9.77994	9.50617	4.34857	0.383904	1.41178	0.497518
TRAF4 _ 212	11.6362	9.79986	7.19645	0.137464	1.36926	0.453396
PKP4 _ 1143	7.67502	9.89293	7.91113	0.341242	0.862166	-0.213963
PHACTR4 _ 657	9.71114	8.12265	8.42734	0.0110668	1.17355	0.230882
PNP _ 249	9.94984	9.48475	8.32688	0.213105	1.11723	0.159927
BCLAF1 _ 290	11.3216	8.52617	6.75969	0.0530966	1.48132	0.566883
CAT _ 84	10.7638	8.70143	4.84017	0.174526	1.58974	0.668789
VTI1B _ 115	10.7197	9.54789	6.60193	0.214418	1.32753	0.40874
NUP155 _ 992	10.9292	9.71602	6.14263	0.235162	1.37832	0.462914
PTPRA _ 798	12.1939	9.5135	5.1836	0.154628	1.65936	0.730628
FLNA _ 2152	10.8152	10.9276	5.58296	0.43918	1.3101	0.389673
CSNK2B _ 209	12.5475	8.9919	6.24304	0.0696944	1.6472	0.720019
42987 _ 278	9.42141	7.89096	5.08848	0.171513	1.45174	0.537787
PAK4 _ 181	10.3595	9.21046	6.20827	0.219531	1.34375	0.426267
RAB11FIP5 _ 344	6.92921	6.07037	13.2271	0.526631	0.718149	-0.477645
CALD1 _ 202	9.81053	7.99786	6.15725	0.0971517	1.38615	0.471079
SPTBN2 _ 2289	11.0397	7.17745	5.78275	0.0226005	1.70364	0.768618
EFNB1 _ 317	11.0301	8.66417	6.1164	0.103772	1.49251	0.577744
EIF2S2 _ 298	10.738	8.8373	6.4912	0.119991	1.40105	0.486506
TJP2 _ 1017	10.2107	8.17017	5.27908	0.137383	1.5184	0.602556
SPTAN1 _ 1073	11.2712	6.53193	5.9191	0.00366767	1.81049	0.856379
TP53BP1 _ 1099	9.87208	10.8212	4.97537	0.569099	1.2499	0.321818
MKI67 _ 2223	10.9651	11.9472	5.51724	0.55919	1.2557	0.328496
TYK2 _ 1054	14.3398	11.477	8.43652	0.102191	1.44021	0.526275
PTPN1 _ 46	9.84584	7.44896	8.31751	0.0456366	1.24896	0.320727
SLC25A6 _ 191	11.8717	8.59624	6.06934	0.0695039	1.61898	0.695087
THRAP3 _ 344	10.0965	12.0027	5.66062	0.728546	1.14322	0.193097
SRRM2 _ 1083	11.3015	8.46594	6.13336	0.0754493	1.54822	0.630613
SIN3A _ 277	9.97871	9.44279	4.48924	0.347913	1.43248	0.518519
PKP3 _ 390	11.2002	8.98614	4.92952	0.171592	1.60973	0.686815
ITGB4 _ 1207	11.3669	9.48446	5.4673	0.192328	1.52047	0.604517
MFAP3 _ 357	10.9604	11.1495	6.20358	0.45322	1.26323	0.337112
ACTR3 _ 16	11.5287	9.29598	4.45483	0.19449	1.6768	0.745708
RAP2C _ 166	11.4505	9.79998	5.52691	0.218311	1.49417	0.579349
PDHA1 _ 331	10.1703	12.1251	3.73004	0.646576	1.2829	0.359413
WWC1 _ 128	9.09384	8.90644	6.61604	0.364619	1.1717	0.228604
HGS _ 524	6.29779	4.31394	25.4711	0.501855	0.422883	-1.24167
PSMD9 _ 62	11.8003	9.12588	7.33087	0.0577227	1.4341	0.520142
CLMN _ 635	11.6135	8.32137	5.55209	0.0775906	1.67421	0.74348
TAB1 _ 391	9.98642	10.3521	7.98219	0.56078	1.08937	0.123497
MICALL1 _ 760	9.57438	6.90881	5.72941	0.0312843	1.51515	0.599458
GPRC5A _ 317	9.21842	7.07558	5.32907	0.0745725	1.48628	0.571711
_ 28	9.98044	10.4804	8.26573	0.638383	1.0648	0.0905852
WDR13 _ 117	2.9277	1.90413	23.7318	0.460475	0.228406	-2.13033
EGFR _ 991	8.69652	8.48061	9.32294	0.674203	0.976943	-0.0336537
SND1 _ 109	10.0007	8.78009	4.70239	0.251	1.48351	0.569019
HNRNPH2 _ 266	9.21604	9.97882	6.89925	0.663934	1.09207	0.127069
EEF1A1P5 _ 86	11.6919	7.98017	6.64668	0.0224113	1.5987	0.676895
PGM2 _ 165	11.394	6.92534	3.48276	0.0693774	2.18944	1.13056
CLTC _ 430	11.1658	9.46571	5.02208	0.219579	1.54141	0.624247
RAB11B _ 8	9.47305	8.64499	8.25182	0.0348929	1.12128	0.165149
YES1 _ 223	11.4524	9.42919	4.93312	0.197818	1.59479	0.673368
HCFC1 _ 666	8.3452	7.15922	9.43125	0.968917	1.00602	0.008663
LSR _ 535	6.49269	11.8161	14.3734	0.0355213	0.495824	-1.0121
PLCG1 _ 977	10.7475	8.03238	6.21626	0.0574528	1.50857	0.593178
PAK2 _ 130	10.6782	10.3527	8.21114	0.322124	1.15043	0.202177
CSK _ 64	12.1687	8.77954	7.23354	0.0328041	1.51985	0.603928
SNRNP70 _ 126	11.6721	9.91301	5.18847	0.223163	1.54582	0.628373
LUZP1 _ 799	9.94621	10.0042	12.4385	0.404733	0.886362	-0.174032
SDCBP _ 46	12.3109	10.2966	6.86134	0.161894	1.43502	0.521067
CHN2 _ 158	9.60919	7.91576	12.2248	0.85038	0.954214	-0.0676146
STAM2 _ 291	10.4353	5.99406	7.85087	0.0632912	1.50745	0.59211
MPP5 _ 245	5.78388	9.46404	4.98692	0.585578	0.800484	-0.321055
YES1 _ 222	10.3475	9.19174	7.19639	0.163549	1.2628	0.336631
CD44 _ 706	9.29339	8.70679	4.34302	0.332182	1.4243	0.510249
PKM _ 370	10.2431	9.7467	5.0446	0.349525	1.38502	0.469911
VASP _ 39	10.5567	8.68224	5.05873	0.178875	1.53653	0.619674
KIAA1217 _ 244	10.2459	8.24908	7.04014	0.0499841	1.34027	0.422529
PPFIBP2 _ 422	14.0779	12.4864	9.71601	0.164656	1.26814	0.342719
RBM15 _ 333	9.92069	12.7269	7.34048	0.970344	0.988738	-0.0163405
YIPF5 _ 42	8.04858	11.4983	7.3702	0.571161	0.853125	-0.22917
PCDH1 _ 1192	8.22781	9.17573	8.30307	0.361754	0.941462	-0.0870259
SCAMP3 _ 35	6.57815	7.95291	17.8693	0.329738	0.509496	-0.972858
RIN1 _ 681	9.19571	10.596	7.00135	0.845669	1.04512	0.0636747
PTPN3 _ 496	9.70229	9.01071	7.91401	0.152164	1.14652	0.197265
TLN1 _ 26	10.6079	8.46766	5.48446	0.135278	1.52061	0.604652
MAPK9 _ 185	9.38373	8.35918	5.60929	0.223074	1.34356	0.42606
LMO7 _ 185	11.761	8.72824	9.8236	0.045295	1.26791	0.342451
STAT5A _ 682	9.73735	10.0959	6.87516	0.5183	1.14752	0.198525
TRIM28 _ 541	5.17512	4.1766	15.3658	0.497699	0.52963	-0.916942
STAT3 _ 704	12.5537	8.83554	13.9048	0.686454	1.1041	0.142866
RAPH1 _ 856	10.817	16.1366	5.76998	0.981414	0.98756	-0.0180601
SHC2 _ 398	11.1595	10.8775	8.70767	0.334782	1.13959	0.188514
FRK _ 193	10.1572	12.0995	9.43371	0.692397	0.943402	-0.0840554
MLLT4 _ 1181	10.868	10.9976	6.56291	0.445805	1.23778	0.307756
GAB1 _ 406	8.68825	10.6674	10.9268	0.00376217	0.804683	-0.313507
MAPK10 _ 223	9.67841	9.12413	6.42533	0.293758	1.24486	0.315978
G6PD _ 447	9.63125	9.29443	4.48187	0.37242	1.39824	0.483607
CD2AP _ 409	11.8017	12.4326	8.63426	0.573011	1.1204	0.164018
SRP68 _ 364	10.5736	11.4006	8.15055	0.671979	1.08163	0.113208
HIPK3 _ 362	9.57176	9.7205	6.39863	0.45869	1.18763	0.248083
PTBP3 _ 133	10.8475	9.00942	5.99257	0.156755	1.44614	0.532206
VPS45 _ 318	8.09377	6.15053	8.56296	0.603378	1.10018	0.137744
SRP14 _ 27	10.3503	9.58067	4.90509	0.315126	1.42904	0.515042
PLS3 _ 127	10.5037	9.64075	4.57621	0.311983	1.47763	0.563287
SRRM1 _ 260	11.7157	9.76179	5.68182	0.189366	1.51723	0.601438
EMD _ 59	8.71441	8.84223	6.99559	0.479728	1.10046	0.138101
HSP90AA1 _ 406	10.0868	9.24379	10.2162	0.539334	1.03668	0.051966
DYRK1A _ 321	10.619	9.15141	5.18945	0.223839	1.48094	0.566514
SPTAN1 _ 1261	7.64185	9.19232	7.25618	0.608545	0.929185	-0.105962
FLNA _ 1308	11.7518	7.15256	6.34618	0.00643348	1.74117	0.800061
CDK16 _ 252	10.4692	7.27782	4.93707	0.0650514	1.71418	0.777515
POLR2G _ 17	9.46291	8.90547	4.86278	0.330171	1.3746	0.45901
ANXA1 _ 207	9.89901	9.3299	4.72523	0.338572	1.4086	0.494259
PGK1 _ 196	8.72649	8.27466	5.77967	0.306265	1.24182	0.312458
PAK2 _ 139	11.2769	9.84841	8.77019	0.0675546	1.21136	0.276624
HNRNPR _ 438	11.412	9.24571	9.40297	0.00141543	1.2239	0.291483
BICD2 _ 582	11.7151	10.2884	6.07082	0.235625	1.43223	0.518266
ERBB3 _ 1328	13.351	9.81215	7.12807	0.0679835	1.57624	0.656491
ZFYVE9 _ 520	5.95128	6.35443	17.7685	0.396405	0.493412	-1.01914
SHB _ 96	11.6003	8.9159	5.70281	0.11624	1.58705	0.666344
CBFB _ 85	10.0491	11.6434	12.0418	0.0121108	0.84855	-0.236928
EPS15L1 _ 229	9.36757	9.43175	7.25157	0.445988	1.12299	0.16734
KIF23 _ 769	8.28336	9.35902	10.5884	0.110708	0.830521	-0.267912
TNS3 _ 855	8.75107	7.56261	16.2803	0.542633	0.734059	-0.446031
SHB _ 336	8.96751	9.01756	8.63999	0.538899	1.01571	0.022494
EIF5B _ 214	8.78551	6.11849	5.91371	0.00136414	1.46033	0.546297
PI4KA _ 633	9.58482	10.9808	5.758	0.687383	1.14522	0.195629
RPL15 _ 59	10.7184	9.61441	4.88093	0.280184	1.47888	0.564504
NUP214 _ 667	10.6113	9.91382	4.60151	0.334017	1.46208	0.54802
COPA _ 588	10.4564	10.8815	5.63425	0.490236	1.26623	0.340542
LNPEP _ 46	9.2994	8.07908	9.31386	0.431772	1.06933	0.0967076
DYRK2 _ 382	11.6981	8.79641	4.35925	0.147349	1.77841	0.830587
TMEM192 _ 213	9.00431	9.80399	3.71663	0.537723	1.33194	0.413526
HNRNPR _ 437	10.2901	10.2144	8.49278	0.390268	1.10012	0.13766
EEF1A1P5 _ 29	10.0525	8.57043	6.04328	0.161876	1.37576	0.460233
EML4 _ 226	9.70432	8.08437	6.79673	0.0722299	1.30425	0.383217
ACLY _ 682	10.0316	8.55411	5.12661	0.203633	1.46653	0.552402
SEC61A1 _ 279	9.09736	5.46115	6.38584	0.020568	1.53581	0.618999
ISOC1 _ 160	8.59342	9.58202	5.24289	0.640788	1.15932	0.213281
PHACTR4 _ 301	8.57354	9.39517	5.55361	0.624908	1.14706	0.197935
HCFC1 _ 411	12.3363	9.3004	6.13338	0.100164	1.59861	0.676815
HSP90AB1 _ 484	9.82822	9.02643	8.66615	0.0320477	1.111	0.151857
HIPK1 _ 352	10.5126	10.0408	4.51214	0.362335	1.44474	0.530813
LDLR _ 828	9.14251	6.64109	10.8872	0.874975	1.04317	0.0609746
BROX _ 21	7.31536	5.1854	7.48933	0.485301	1.15432	0.207047
HNRNPA3 _ 358	9.88486	11.5865	4.23666	0.645038	1.24942	0.321255
GDI2 _ 442	9.21554	9.52034	5.48664	0.485351	1.22817	0.296507
GAREM _ 453	10.4182	11.3689	11.21	0.00821231	0.922824	-0.115872
MICALL1 _ 391	10.2966	9.39865	3.73301	0.3185	1.56821	0.649117
BAIAP2L1 _ 163	10.4423	9.41729	9.85724	0.0672286	1.08353	0.115739
EPS15 _ 849	5.61171	6.03007	21.0295	0.40177	0.414767	-1.26963
SYNPO _ 804	10.3829	10.0043	6.59364	0.346185	1.2511	0.323202
PALLD _ 641	9.67204	6.79114	5.18038	0.0445668	1.61584	0.692286
PLCG2 _ 759	10.9977	10.3681	8.36601	0.244876	1.17408	0.231534
DDR1 _ 798	9.91105	11.3175	6.95298	0.756205	1.08492	0.117595
ICA1 _ 262	8.11904	7.63335	13.4252	0.492802	0.771094	-0.375022
SHC1 _ 428	11.8098	12.0317	8.83031	0.479796	1.13219	0.179111
GORASP2 _ 225	8.06375	11.5	6.00104	0.82607	0.921517	-0.117918
STAM2 _ 192	6.21182	4.15485	18.1164	0.553682	0.557833	-0.842094
PTPRK _ 917	10.3565	7.7714	6.74845	0.0262138	1.42654	0.512516
TMEM55B _ 169	9.60893	13.3871	7.69382	0.774568	0.911625	-0.133487
GGT6 _ 10	7.44345	8.0128	10.8616	0.296549	0.788734	-0.342389
EEF1D _ 499	10.6966	8.76182	5.37322	0.16549	1.51348	0.597871
JAK2 _ 570	8.02053	9.88993	5.72533	0.927891	1.02727	0.0388133
RBM3 _ 127	9.2842	9.28853	5.55423	0.423544	1.25101	0.32309
AGO3 _ 189	11.6533	8.46961	7.65596	0.0125966	1.44532	0.531384
IQGAP1 _ 172	8.18343	7.91607	8.07201	0.135809	1.02369	0.0337806
FAM83B _ 896	9.34899	9.73725	7.54101	0.584274	1.08217	0.113925
CRKL _ 105	8.13694	7.99671	12.4215	0.447829	0.797026	-0.327302
KIAA1217 _ 393	7.88054	10.5007	7.89831	0.41743	0.856628	-0.223259
PDZK1IP1 _ 99	5.87083	9.63937	8.17176	0.0537942	0.659232	-0.601142
USP43 _ 835	12.2135	7.36217	12.6062	0.484743	1.22329	0.290763
CLDN3 _ 198	7.0919	7.29485	4.76385	0.489488	1.17623	0.23417
SLC4A1AP _ 82	10.2379	10.4161	5.57469	0.452038	1.28048	0.356682
PGAM4 _ 92	9.86159	9.3198	3.89424	0.353092	1.49259	0.577821
KIAA1549L _ 1417	9.36279	9.96851	8.83361	0.952369	0.995929	-0.00588452
PIK3R1 _ 431	9.39891	7.56428	12.5484	0.816621	0.934625	-0.09754
EIF4B _ 211	9.58293	10.5656	12.3536	0.170644	0.836234	-0.258021
LBR _ 166	9.52744	8.40908	9.31953	0.282499	1.07481	0.104082
CCNK _ 324	11.4594	9.06127	6.24454	0.113965	1.49739	0.582447
SLC39A10 _ 596	9.60908	9.22614	8.38018	0.197017	1.09155	0.126378
AHNAK _ 5731	9.98694	9.5276	7.49266	0.283765	1.17354	0.230862
LCHN _ 213	7.69704	7.54705	8.44614	0.573762	0.96254	-0.0550822
CTNND1 _ 334	8.44057	8.32715	11.3206	0.452941	0.859189	-0.218952
CDK3 _ 19	10.4589	9.60698	4.41107	0.315487	1.4922	0.577443
VCL _ 822	9.71658	9.25502	4.70812	0.352057	1.39175	0.476897
VCL _ 692	9.63206	9.15318	5.05459	0.342631	1.35589	0.439235
EPN1 _ 540	8.74067	10.1981	8.84647	0.366939	0.917918	-0.123563
EMD _ 49	9.99054	10.2109	6.01139	0.465219	1.2317	0.300653
SNTB1 _ 87	8.95102	10.4434	6.05255	0.779161	1.08524	0.118009
CDK16 _ 249	9.33353	10.4506	3.49925	0.567382	1.33816	0.420245
OSBPL11 _ 189	7.9491	8.24997	9.51036	0.277609	0.895153	-0.159794
TNK2 _ 859	10.5517	10.6186	7.2384	0.438192	1.1818	0.240985
GMDS _ 327	9.19656	10.7143	4.41125	0.655827	1.21603	0.282177
NAALADL2 _ 106	8.70134	8.6989	8.25124	0.418472	1.0267	0.038013
TJP2 _ 1066	11.0984	12.442	9.31627	0.901278	1.02015	0.0287883
CTTN _ 409	9.29888	9.75412	8.03287	0.683992	1.04558	0.0643071
STAT6 _ 641	10.8136	10.1049	16.228	0.522531	0.8213	-0.284018
TKT _ 283	9.60598	8.43807	3.94738	0.267843	1.55117	0.633358
SNTA1 _ 175	10.0293	8.01745	15.25	0.70066	0.862087	-0.214095
STAT3 _ 727	12.0871	9.68215	7.42252	0.0887725	1.4133	0.499072
HNRNPA2B1 _ 259	11.8334	10.1324	5.20091	0.233123	1.54348	0.626191
SLC25A5 _ 195	10.9278	9.68699	6.62669	0.211858	1.33971	0.421921
EGFR _ 978	9.30739	8.65786	5.92951	0.27791	1.27609	0.351729
TCOF1 _ 583	12.4266	9.80121	3.84304	0.200665	1.82152	0.865139
PTK2 _ 570	9.71353	9.49102	4.02406	0.392569	1.43744	0.523498
PTK2 _ 575	9.18913	8.49146	7.24919	0.167722	1.16757	0.223504
CLINT1 _ 159	7.05013	8.75265	12.2221	0.186054	0.672248	-0.572935
SRC _ 193	8.36903	8.83263	5.99817	0.570353	1.1286	0.174536
SLTM _ 553	9.75029	9.45083	6.15354	0.358814	1.24969	0.321567
MGP _ 107	11.6343	10.8444	4.26199	0.340724	1.54031	0.623224
KPNA6 _ 474	11.2157	7.55149	5.57464	0.042291	1.70891	0.773074
EEF1A1P5 _ 141	9.56111	9.82172	3.80036	0.457435	1.40377	0.489304
PLXNB2 _ 1621	12.1788	9.08674	6.55445	0.0750274	1.55727	0.639018
SET _ 7	7.91521	10.6818	6.33506	0.810498	0.930281	-0.104262
DSC2 _ 853	9.94718	7.71519	12.3738	0.970468	0.990311	-0.0140469
CTNND1 _ 296	8.91848	9.4566	10.1227	0.120333	0.911012	-0.134458
INADL _ 393	9.58285	9.34293	6.77865	0.357068	1.18882	0.249533
ACTB _ 53	7.49291	6.65577	10.9815	0.602325	0.849667	-0.23503
EGFR _ 693	13.3978	10.8437	9.01994	0.0627697	1.34898	0.431871
MYL6 _ 89	13.3509	9.4265	7.87038	0.026301	1.54374	0.626426
EPHB4 _ 581	11.0837	8.73029	6.40784	0.0940208	1.46434	0.550253
ARFGAP2 _ 278	9.76378	8.7974	8.37184	0.0310542	1.13736	0.185685
PKP2 _ 626	9.55994	8.75561	7.56985	0.142543	1.17117	0.22795
DBI _ 90	7.75895	8.67557	5.41354	0.704146	1.10141	0.139354
PFN1 _ 129	9.72468	9.75745	6.97194	0.431814	1.16259	0.217337
RCN2 _ 313	9.88615	10.409	6.89513	0.555163	1.14264	0.192366
PLCG2 _ 1245	8.65933	9.41042	11.6812	0.238498	0.821114	-0.284345
RPSA _ 139	11.0516	9.47014	3.42663	0.267126	1.71386	0.777247
ANXA5 _ 94	9.90642	9.35038	4.73722	0.340403	1.4064	0.49201
MAGI1 _ 373	8.46877	8.77714	4.99948	0.49079	1.22944	0.298002
ITGB4 _ 1474	9.08041	9.86127	7.8405	0.841405	1.02593	0.036935
KLC2 _ 582	7.28717	13.3339	7.2991	0.421131	0.706361	-0.501523
ABI1 _ 183	9.54099	9.65891	4.48263	0.44059	1.34936	0.432271
ABL2 _ 568	8.84122	9.45621	8.22714	0.999476	0.999949	-7.42496e-05
ZYX _ 267	8.18433	8.44922	6.95278	0.584519	1.06276	0.0878181
PKP3 _ 176	10.2031	8.32546	9.08162	0.0580851	1.17229	0.229332
MKI67 _ 357	10.8091	10.1531	5.20034	0.333338	1.40803	0.493681
DNM1L _ 629	8.74958	10.2854	5.09189	0.722447	1.13799	0.186488
LSM14A _ 220	10.5724	9.6712	4.2221	0.314708	1.52194	0.605909
SHB _ 268	8.54883	9.04255	11.7624	0.306037	0.821807	-0.283129
FLNA _ 2379	10.3291	7.47329	5.87499	0.0446314	1.54763	0.63006
RAB7A _ 183	6.81268	8.01398	19.4521	0.349869	0.49608	-1.01136
PRKD2 _ 378	9.59448	8.65333	6.65428	0.191689	1.25356	0.326027
RAB35 _ 5	12.467	7.6563	10.7021	0.163494	1.35818	0.441672
PTK2 _ 576	7.49464	6.92372	9.44946	0.638733	0.915478	-0.127403
ACTB _ 218	9.96047	9.52031	4.99363	0.354741	1.37254	0.456846
ADAM9 _ 769	6.28849	8.9685	6.8332	0.270078	0.795926	-0.329295
CLCC1 _ 412	9.00322	9.14604	6.87582	0.474203	1.12387	0.168472
CRKL _ 251	8.74299	7.18519	12.4952	0.719511	0.888497	-0.170562
RPS16 _ 82	9.7679	11.8296	5.07181	0.734256	1.15587	0.208979
USP24 _ 2024	11.0032	8.63594	9.56491	0.0547436	1.20908	0.273913
SPRY1 _ 89	9.50388	7.6524	9.91703	0.590316	1.08187	0.113521
PNN _ 66	10.7643	10.3893	11.8104	0.683259	0.969769	-0.0442873
SET _ 146	8.82668	8.5772	7.30749	0.298266	1.11134	0.152306
EGFR _ 1110	10.2057	10.5042	7.54727	0.508519	1.13073	0.177259
CD2AP _ 361	9.45572	10.6815	9.81951	0.206487	0.922462	-0.116439
C18orf8 _ 430	9.74126	6.96236	9.4603	0.345284	1.18632	0.246492
ANXA2 _ 206	9.06054	9.00182	8.87935	0.189191	1.01342	0.0192278
G3BP2 _ 225	11.9489	8.48617	4.05101	0.124562	1.90616	0.930668
FAM129B _ 665	9.69361	8.85846	4.73777	0.29512	1.42593	0.5119
GSK3A _ 279	9.09235	8.54873	4.23747	0.337084	1.42221	0.508138
PRKCD _ 374	10.6859	10.2864	4.00701	0.376701	1.49522	0.580355
SLC15A1 _ 697	9.31438	8.2346	5.9093	0.193558	1.31709	0.397352
ALDOA _ 414	10.3601	10.2103	10.1085	0.0587264	1.01975	0.0282133
MYH9 _ 754	8.78803	8.6283	7.29745	0.340715	1.10362	0.14225
CDK16 _ 254	10.3132	8.59237	3.46075	0.236744	1.71128	0.775078
SEC31A _ 799	10.61	10.6101	4.95795	0.422659	1.36305	0.446839
LIN7C _ 58	11.0932	9.16392	5.69128	0.169186	1.49351	0.578706
EIF4G1 _ 1238	9.44845	14.8618	5.78864	0.8646	0.915086	-0.128021
ASS1 _ 131	9.79138	10.8667	4.55581	0.577506	1.26975	0.344548
EPHA2 _ 628	11.6005	8.92246	5.02595	0.140828	1.66335	0.73409
NUCKS1 _ 214	9.97858	8.5785	4.56916	0.231528	1.51793	0.602101
EPB41L1 _ 343	7.47053	7.16232	8.77895	0.599194	0.937257	-0.0934832
PKM _ 175	9.69064	9.61205	3.07956	0.4135	1.52709	0.610787
DDR1 _ 520	6.00731	9.64219	7.54026	0.133172	0.699238	-0.516145
PKM _ 105	9.38751	8.58297	3.9073	0.311079	1.50317	0.58801
NT5DC2 _ 456	9.59957	8.46957	6.49939	0.164876	1.2826	0.359068
HSP90AA1 _ 353	9.31598	10.3504	4.48963	0.58397	1.25552	0.328287
MICALL1 _ 640	5.35192	5.38933	2.99028	0.434841	1.27737	0.353175
CC2D1A _ 207	10.8065	10.1498	7.43887	0.275958	1.2288	0.297256
CPNE3 _ 392	7.77195	6.34892	4.03293	0.155626	1.49722	0.582285
ANKS1A _ 455	8.53559	7.9639	9.43373	0.844859	0.981237	-0.0273269
GOT2 _ 96	11.4537	11.7046	3.19954	0.446037	1.53698	0.620101
SHB _ 114	9.26029	9.84273	8.73519	0.963418	0.996914	-0.00445944
MFSD6 _ 20	6.46734	8.3737	14.4186	0.244519	0.567502	-0.817302
TOP1 _ 125	8.79507	10.0955	13.6505	0.225489	0.740762	-0.432919
PTPN11 _ 62	8.97553	11.0226	3.74541	0.704521	1.21554	0.281593
GAB2 _ 293	7.31864	8.11167	11.5449	0.281251	0.744649	-0.425367
STAT3 _ 539	11.9007	8.91165	9.73831	0.0247983	1.27621	0.35187
CIC _ 277	8.48568	10.6191	9.52915	0.100306	0.842326	-0.24755
SCAMP3 _ 85	6.11112	6.67566	21.0024	0.39349	0.441585	-1.17924
MUC1 _ 1252	7.70812	6.97636	9.20803	0.763511	0.952537	-0.0701531
HSP90AB1 _ 255	10.5091	8.56127	4.02778	0.204074	1.66956	0.739468
HSP90AB1 _ 226	9.23084	9.32777	4.23002	0.437567	1.3617	0.445412
PKP2 _ 631	8.70895	8.7551	9.08046	0.327884	0.976582	-0.0341866
C6orf132 _ 1067	7.04857	13.0611	9.69735	0.1235	0.619425	-0.690999
HSP90AA1 _ 385	9.66692	9.28392	4.143	0.369424	1.43993	0.525999
SLC25A6 _ 81	12.1488	10.4779	4.64555	0.256365	1.60661	0.684022
PRKCD _ 313	7.47014	6.51806	4.43432	0.195755	1.36411	0.447961
IRF2BPL _ 69	10.4199	14.1055	7.0741	0.965858	0.983961	-0.0233271
SLC4A2 _ 73	9.34931	9.52453	7.79342	0.508769	1.07973	0.110664
BAIAP2L1 _ 274	9.91555	10.1705	9.33705	0.735276	1.01659	0.0237329
RAI14 _ 222	9.82149	7.30411	9.14611	0.225177	1.19409	0.255907
EGFR _ 995	8.46365	8.61018	10.4345	0.365598	0.888822	-0.170034
DDX3X _ 266	9.43228	7.7559	6.7055	0.0524708	1.30448	0.383471
LYN _ 508	8.28514	10.4937	8.06675	0.498382	0.892775	-0.163631
SCAMP3 _ 53	5.83644	5.15197	20.9951	0.457371	0.446432	-1.16349
GPRC5A _ 347	8.60099	9.10715	8.84928	0.0996627	0.957984	-0.0619263
ARHGEF2 _ 125	7.72822	6.93109	14.0317	0.519196	0.737326	-0.439625
KIRREL _ 663	8.43337	9.49942	9.20898	0.0239793	0.90156	-0.149505
LSR _ 332	10.3661	9.03855	8.24249	0.0493038	1.19971	0.262686
OTUD6B _ 272	7.80904	7.92772	9.34382	0.363327	0.904266	-0.14518
RAVER1 _ 585	7.22002	10.3008	10.1438	0.000683136	0.706299	-0.501649
FRK _ 497	9.37332	8.5336	8.03616	0.0484528	1.13138	0.17808
MAPKAPK3 _ 207	6.3233	11.8694	11.3104	0.00280476	0.545588	-0.874117
ZYX _ 344	6.81771	7.84679	8.53306	0.0572153	0.83245	-0.264564
CTTN _ 141	8.75422	7.93494	10.4723	0.757022	0.951169	-0.0722267
PLIN3 _ 95	8.73242	9.06472	8.29083	0.900624	1.0063	0.0090574
PFKFB2 _ 466	7.21069	9.264	6.39524	0.708167	0.92095	-0.118805
EGFR _ 1138	5.76825	9.84528	15.9663	0.144932	0.44695	-1.16181
EPHA2 _ 594	7.99013	9.7763	7.12339	0.761979	0.945595	-0.0807056
CDK5 _ 15	9.26869	10.8813	5.92705	0.76041	1.10287	0.141258
ANK3 _ 1459	6.18662	8.25559	9.9484	0.0749373	0.679699	-0.557032
GTF2E2 _ 284	8.71198	7.80749	10.7738	0.734051	0.937715	-0.0927783
AHNAK _ 121	8.40307	8.97641	8.88819	0.00687647	0.940751	-0.088115
RPLP0P6 _ 24	9.39313	9.21529	4.67337	0.393667	1.35263	0.435771
EGFR _ 1172	7.84533	10.7121	11.0922	0.00384249	0.719615	-0.474703
NCK1 _ 105	9.99458	10.3876	6.9387	0.520817	1.15369	0.206252
POGZ _ 445	9.88383	8.0643	5.73629	0.12443	1.43238	0.518412
KIF23 _ 949	11.6787	10.2468	12.1285	0.653804	1.04389	0.0619652
SIGIRR _ 402	7.49272	6.86474	11.7028	0.53618	0.807079	-0.309219
RAVER1 _ 581	8.48155	9.77001	8.92451	0.177151	0.907384	-0.140216
CAP1 _ 419	10.0901	9.99657	4.66312	0.409382	1.37658	0.461088
PARD3 _ 386	10.1903	8.76984	6.05704	0.177222	1.37458	0.458986
UPF1 _ 1118	7.31456	7.54853	9.46987	0.33966	0.859606	-0.218252
ENO3 _ 44	7.57211	6.67277	8.83208	0.882719	0.976741	-0.0339527
G6PD _ 549	9.48083	9.09231	6.26102	0.330555	1.23502	0.304533
CTNND1 _ 208	7.39959	8.60024	10.5311	0.154029	0.773558	-0.370419
AFAP1L2 _ 411	7.40166	9.76302	6.47554	0.705028	0.911615	-0.133503
ZNF185 _ 613	8.52663	9.56208	14.409	0.289653	0.711411	-0.491246
CYSTM1 _ 64	8.63651	9.24169	9.30231	0.00226707	0.931462	-0.102431
MUC1 _ 1238	7.58954	10.2509	4.99111	0.991536	0.995869	-0.00597161
SNRPC _ 12	9.71271	8.36446	7.39766	0.0631277	1.23241	0.301483
PLEC _ 4668	8.54594	7.52043	12.3166	0.624842	0.861617	-0.214882
ATP1A1 _ 684	9.48072	7.69654	5.23308	0.13406	1.46651	0.552389
NUP35 _ 300	8.58079	8.15443	11.9494	0.51928	0.853647	-0.228288
TWF2 _ 309	10.3296	8.54792	3.75437	0.223391	1.6793	0.747858
STAP2 _ 256	12.8881	10.817	10.7753	9.91829e-05	1.19377	0.255524
SCRIB _ 1360	10.4245	9.4028	6.89462	0.211239	1.27928	0.35533
MYO1E _ 974	8.84192	9.74581	7.4697	0.856025	1.0272	0.0387221
EMD _ 105	9.06952	10.8313	9.27938	0.331714	0.901958	-0.148867
ALDOA _ 258	9.24093	10.9478	4.23541	0.671758	1.21726	0.283636
CLDN4 _ 208	8.39507	8.91407	8.69078	0.0675922	0.953722	-0.0683587
TRPS1 _ 905	8.84891	10.3225	5.57824	0.741272	1.11302	0.154479
EIF1 _ 30	9.57671	6.52028	6.39012	0.000434418	1.48357	0.569069
LAPTM4A _ 230	9.24234	8.54832	5.74375	0.273556	1.29335	0.371115
TES _ 251	9.8843	9.73812	4.41376	0.402088	1.39689	0.482217
TANC1 _ 1827	10.2002	7.26585	13.1634	0.996553	0.998593	-0.0020315
NRK _ 984	9.03641	10.1347	9.70937	0.0531143	0.910741	-0.134887
PKP4 _ 281	9.57378	10.0531	7.57195	0.601966	1.08638	0.119531
ROCK2 _ 722	9.75149	9.89454	7.6027	0.473775	1.11463	0.156568
CD46 _ 387	6.74536	7.75105	8.78027	0.09802	0.81607	-0.293235
ITGB1 _ 783	9.61343	9.00949	7.25697	0.233238	1.18199	0.241222
SHB _ 272	7.82691	9.44188	10.8674	0.0823427	0.770773	-0.375621
PTK2 _ 861	4.53133	3.60889	9.61212	0.560127	0.685474	-0.544827
LDLR _ 845	8.895	8.94069	13.5398	0.415078	0.791355	-0.337604
ATP1A1 _ 10	7.92521	9.9403	9.00895	0.0796818	0.836467	-0.25762
PCDH1 _ 962	6.82735	6.38495	8.51514	0.617956	0.916417	-0.125924
MAPK7 _ 221	9.99863	5.97619	8.94127	0.228807	1.34053	0.422801
TRIP12 _ 859	10.7129	12.5733	10.6371	0.453996	0.923112	-0.115423
GPR126 _ 1172	7.89759	6.9773	6.71099	0.0156039	1.15392	0.206543
KIAA1522 _ 1030	7.85166	8.47767	6.7282	0.802883	1.03271	0.0464416
FLNB _ 2533	6.84599	10.0327	11.6225	0.0376215	0.632271	-0.661386
INSR _ 1189	5.73863	8.49939	6.01606	0.345747	0.790693	-0.338811
KIRREL _ 638	7.20074	7.03976	10.3968	0.46137	0.825934	-0.275901
EPHA2 _ 575	8.69875	7.83815	8.94017	0.630782	1.0369	0.0522809
LARP4B _ 718	8.96634	9.9165	3.89184	0.564295	1.29868	0.377051
CHAMP1 _ 204	10.2234	11.2923	5.76095	0.602029	1.19899	0.261821
CTNND1 _ 865	8.78024	9.10226	8.07005	0.743011	1.0226	0.0322489
RAC1 _ 79	9.17513	8.70007	8.1495	0.112366	1.08906	0.123088
DDX17 _ 279	10.6309	8.46837	6.93384	0.0622473	1.38044	0.465128
IQGAP3 _ 1098	9.3468	8.30233	9.66529	0.647532	1.0404	0.0571446
EGFR _ 1166	9.8397	10.5454	8.23681	0.735021	1.04777	0.0673191
GAB2 _ 614	8.57551	5.07652	13.3748	0.889875	0.929529	-0.105428
POLDIP3 _ 236	9.88539	8.44888	10.722	0.816547	1.03129	0.0444548
LSR _ 372	11.0489	8.04438	8.45645	0.00537677	1.33919	0.421363
TUBA1B _ 357	8.79848	9.76176	5.17004	0.620311	1.17849	0.236938
NUCKS1 _ 181	9.50822	9.23208	3.25827	0.388676	1.52249	0.606433
MPP5 _ 243	5.26753	7.29193	5.98123	0.171909	0.793711	-0.333314
CDK3 _ 15	11.1763	9.64233	4.79979	0.243962	1.54774	0.630161
TFRC _ 20	7.93273	8.38682	9.1753	0.164322	0.903391	-0.146578
42985 _ 319	9.18985	10.2064	11.7051	0.142548	0.838816	-0.253574
TENC1 _ 493	6.99429	7.93406	7.443	0.105633	0.909705	-0.136529
SH2B1 _ 55	14.2195	9.30526	8.28931	0.00866299	1.61635	0.692736
ZNF185 _ 85	9.69292	11.3886	8.45603	0.890046	0.976881	-0.0337455
PPP1R14B _ 29	9.63464	9.34642	8.40307	0.248474	1.08563	0.118526
YBX1 _ 208	7.90302	8.91006	11.6468	0.224709	0.768892	-0.379148
WASL _ 256	7.08975	9.40934	6.75881	0.531338	0.877001	-0.189349
PLCG2 _ 763	11.1897	11.1493	10.0237	0.395972	1.05698	0.0799496
TOM1 _ 386	8.2646	9.92098	11.175	0.067821	0.783524	-0.35195
TOM1L2 _ 404	9.00617	9.33828	17.2427	0.391639	0.67764	-0.56141
SGK223 _ 411	5.7445	7.30877	8.84923	0.0937919	0.71104	-0.491997
APLP2 _ 750	8.79492	11.1396	5.49213	0.880889	1.05761	0.0808054
GAPDH _ 184	10.3362	9.04857	3.74467	0.275715	1.61589	0.69233
CAV1 _ 14	7.78092	9.5754	14.4931	0.225804	0.646566	-0.629131
MARCKS _ 170	4.15345	5.481	13.5397	0.31506	0.43673	-1.19519
BAIAP2 _ 505	8.92797	8.44221	12.6645	0.521856	0.845984	-0.241298
ZRANB2 _ 102	10.9888	11.0228	7.10825	0.429398	1.21215	0.277569
PTK2 _ 938	10.3878	11.5803	7.01094	0.679776	1.11749	0.160266
DDR1 _ 802	9.91602	13.0065	6.34431	0.948993	1.02487	0.035437
CDCP1 _ 707	6.75303	6.65615	5.132	0.376737	1.14573	0.19627
SHB _ 246	8.02975	9.21495	12.3262	0.220149	0.745526	-0.42367
DHX9 _ 132	9.04075	11.1367	8.49936	0.615281	0.920832	-0.11899
CTNNB1 _ 142	9.64006	10.1871	9.92069	0.0898466	0.958841	-0.0606372
PGK1 _ 203	8.5441	10.0328	3.08031	0.625182	1.30314	0.381993
PLEKHA1 _ 345	6.87723	7.12069	14.9848	0.399545	0.62222	-0.684503
OCLN _ 325	7.89779	7.66629	8.50177	0.699333	0.976961	-0.0336265
SLC1A5 _ 524	7.3817	11.3207	8.28368	0.251971	0.753066	-0.409151
ANXA1 _ 39	6.76597	11.9556	6.25783	0.497646	0.742967	-0.42863
HMGA1 _ 36	11.9519	10.9101	3.65714	0.326861	1.64093	0.714514
USP9X _ 2556	8.49023	9.07547	7.43448	0.801301	1.0285	0.0405393
STAM2 _ 374	5.23593	6.12244	18.2176	0.370221	0.430232	-1.21681
PLEC _ 4611	7.43613	4.55528	20.7467	0.58549	0.587791	-0.766624
PKP4 _ 1115	9.57751	6.70292	11.3098	0.827295	1.06342	0.0887105
STXBP3 _ 521	8.50465	11.187	9.38349	0.187007	0.826878	-0.274253
PKP4 _ 478	6.75291	8.56787	8.92389	0.0078836	0.772125	-0.373094
IQSEC1 _ 343	7.7861	9.27148	10.8662	0.103425	0.773287	-0.370924
WDR13 _ 128	4.88608	4.84983	13.7418	0.425801	0.525621	-0.927906
PLEKHS1 _ 209	5.43586	7.62001	6.44519	0.112879	0.772952	-0.37155
ZNF185 _ 195	9.12917	13.4939	8.42519	0.545187	0.832988	-0.263633
MYH9 _ 1943	10.2571	8.91861	5.09138	0.231332	1.46426	0.55017
HIPK3 _ 359	10.3622	11.0062	3.40523	0.493584	1.43806	0.52412
ZDHHC5 _ 630	8.46595	10.0952	9.22795	0.110218	0.876248	-0.190589
SNW1 _ 176	8.43631	9.9225	8.83838	0.223675	0.899351	-0.153044
SSBP1 _ 73	6.58949	8.04705	9.77631	0.11517	0.739422	-0.435531
CTNND1 _ 288	10.3044	8.34955	8.58317	0.00401431	1.2171	0.283444
INPPL1 _ 1135	8.47469	7.67374	11.9777	0.594256	0.862501	-0.213402
CRKL _ 207	8.10568	12.7066	7.7204	0.486873	0.793624	-0.333472
CD44 _ 697	8.82704	7.73601	6.80445	0.0790457	1.21413	0.279928
RNF114 _ 116	7.20808	10.0882	14.1971	0.138272	0.593615	-0.7524
C11orf52 _ 78	8.11137	10.34	9.7133	0.0257382	0.808981	-0.305822
TAGLN2 _ 192	8.95334	9.35779	8.65728	0.891243	0.993984	-0.00870607
ZNF185 _ 652	9.8421	13.4355	9.50061	0.495457	0.858218	-0.220584
SLC6A8 _ 5	8.4481	9.22627	10.6144	0.167971	0.851593	-0.231765
NCK2 _ 99	9.12262	9.44073	13.9474	0.372021	0.780108	-0.358255
ANO1 _ 981	7.22528	8.54724	6.93184	0.589476	0.933555	-0.0991937
ZDHHC18 _ 6	8.39439	10.0629	10.0435	3.42305e-05	0.834994	-0.260162
PPP1CA _ 317	7.79915	8.26115	6.55613	0.691858	1.05271	0.0741075
ROCK2 _ 1318	10.4061	13.0419	10.6544	0.350488	0.878286	-0.187237
MYO6 _ 1182	7.77378	10.7658	11.2146	0.00483377	0.707337	-0.49953
PLCG1 _ 783	8.52102	10.4854	11.5071	0.0400507	0.7749	-0.367917
MTMR6 _ 598	5.78183	5.99775	13.1873	0.400215	0.602744	-0.730383
LSR _ 615	6.94614	9.43793	13.4801	0.155188	0.606173	-0.722197
RPS10 _ 12	8.78457	11.3077	6.46862	0.969742	0.988346	-0.016912
PLCG2 _ 753	8.01522	7.88278	11.2174	0.454457	0.83928	-0.252776
LSR _ 586	7.23919	8.37241	11.3859	0.221855	0.732774	-0.448559
HNRNPM _ 64	7.18389	11.4976	7.25524	0.409919	0.766165	-0.384274
ABI2 _ 213	7.81142	11.2043	11.2707	9.40111e-05	0.695119	-0.524668
GIGYF2 _ 26	10.0816	9.69657	3.46441	0.37795	1.53204	0.61545
42980 _ 52	7.96645	11.2316	11.086	0.000519864	0.713915	-0.486175
PKP3 _ 84	7.5476	8.00666	11.558	0.335209	0.771553	-0.374163
PDZK1IP1 _ 83	7.04791	8.15809	4.88949	0.778846	1.08034	0.111485
LPHN2 _ 1421	8.09798	10.0081	11.4471	0.0673868	0.754873	-0.405694
TNS1 _ 1326	9.79113	10.8884	8.42476	0.922986	1.01393	0.0199646
DSG2 _ 1013	6.95003	8.1889	11.1775	0.208892	0.717741	-0.478464
PVRL1 _ 468	8.87522	10.28	6.19034	0.783895	1.07772	0.107986
PCDH1 _ 1158	7.46326	7.83405	9.317	0.272375	0.870297	-0.20042
TUBA1B _ 282	8.34899	11.5754	9.68248	0.137628	0.785497	-0.348323
FUBP1 _ 58	6.04733	9.11311	11.0375	0.0525993	0.600214	-0.736451
PTTG2 _ 165	7.36151	12.8339	2.39037	0.96608	0.967075	-0.0483005
AGFG1 _ 336	6.51694	9.73852	14.3949	0.139967	0.540077	-0.888762
PLCG2 _ 1217	7.82873	8.23424	8.70513	0.112594	0.924323	-0.11353
LAMTOR1 _ 140	7.8156	6.92443	10.3345	0.680204	0.905689	-0.142913
HGS _ 237	6.57235	7.28976	17.3739	0.371651	0.532958	-0.907907
TUBA1C _ 282	7.90458	11.5311	9.46321	0.128981	0.753023	-0.409235
STMN1 _ 38	7.61342	8.97679	5.07035	0.791169	1.08398	0.116341
TNKS1BP1 _ 897	8.52215	10.776	7.12124	0.837173	0.95234	-0.0704512
SND1 _ 908	7.02118	9.2488	12.3647	0.135729	0.649702	-0.622149
ENSA _ 87	7.51284	9.28394	11.3066	0.110618	0.729736	-0.454553
PARD3 _ 489	7.0591	14.0468	8.76113	0.241897	0.619002	-0.691983
SPRED1 _ 292	9.1329	9.9314	10.9739	0.126954	0.873742	-0.194721
LSR _ 328	5.41234	3.88232	9.74676	0.679676	0.794234	-0.332364
INADL _ 938	5.60388	7.15928	9.3689	0.137727	0.6781	-0.56043
MAPK11 _ 182	5.51961	9.4933	7.90872	0.0567884	0.634364	-0.656616
AHNAK _ 1469	7.72403	8.5279	18.4215	0.364991	0.573225	-0.802825
CPSF7 _ 494	9.89542	8.37979	9.77276	0.360586	1.09025	0.12466
AHNAK _ 160	8.8596	10.1336	8.92046	0.385924	0.929944	-0.104785
HNRNPAB _ 270	8.12629	12.0449	9.7239	0.140635	0.746598	-0.421597
MELK _ 438	7.98737	10.1222	12.1822	0.0915998	0.716213	-0.48154
CTNND1 _ 280	8.33341	9.87047	11.7508	0.118891	0.770854	-0.375471
ARVCF _ 182	10.8706	10.1249	8.01477	0.229991	1.19854	0.261279
SGMS2 _ 59	9.58025	10.4621	7.14259	0.68541	1.08838	0.122177
APP _ 757	9.89021	11.9538	5.54028	0.755571	1.13069	0.177206
SHB _ 10	7.47661	8.76992	9.32096	0.0294862	0.826561	-0.274807
CSRP1 _ 71	6.87129	8.8813	11.1907	0.111331	0.684666	-0.546528
PDZK1IP1 _ 85	8.00973	7.49719	5.4811	0.270473	1.23433	0.303726
ZC3HAV1 _ 299	7.38155	8.42412	11.4972	0.235253	0.74107	-0.432319
CTTN _ 178	7.83029	10.3148	10.3375	2.06392e-05	0.758297	-0.399166
SPRED1 _ 294	11.1198	8.6144	8.05491	0.0099379	1.33417	0.415943
EPHA2 _ 772	6.74053	8.30777	9.08107	0.0369994	0.775271	-0.367228
SMAP _ 84	10.2033	7.6218	10.3987	0.480722	1.13242	0.179405
PKP4 _ 415	6.19278	7.45092	9.47674	0.154196	0.731676	-0.450724
RBCK1 _ 262	8.26218	9.27628	11.7387	0.209769	0.786313	-0.346825
MINK1 _ 906	7.44205	9.15475	15.1504	0.256712	0.612385	-0.707488
GAB1 _ 259	7.07225	7.64479	13.5524	0.354943	0.667282	-0.583632
ATIC _ 208	8.12625	8.78403	6.37765	0.694765	1.07195	0.100232
EGFR _ 1197	6.47569	10.1934	13.3028	0.0770344	0.551212	-0.859321
TMEM106B _ 50	8.10015	13.2395	7.6194	0.494328	0.77666	-0.364644
PARD3B _ 1000	4.93043	5.46705	6.75577	0.208289	0.806758	-0.309793
CLDN3 _ 214	7.51133	9.63205	7.72706	0.344816	0.865405	-0.208552
APP _ 762	11.2036	13.562	4.30039	0.672186	1.25443	0.327037
ERBB2IP _ 1104	7.70645	9.28852	12.3451	0.178796	0.712452	-0.489136
ARHGAP32 _ 621	6.8323	11.9684	10.0385	0.0495761	0.620923	-0.687513
STAM2 _ 371	4.56504	5.10313	21.3566	0.397995	0.345055	-1.5351
FAM105B _ 56	7.30294	7.22524	15.6577	0.429809	0.638287	-0.647722
ZDHHC5 _ 711	6.4407	8.63037	10.7077	0.0897892	0.666117	-0.586153
PTTG2 _ 111	10.6575	9.11857	11.1213	0.645132	1.05312	0.0746644
FUBP1 _ 60	7.16379	10.6439	10.4016	0.00129925	0.680791	-0.554717
MYL12B _ 156	8.97563	7.64653	11.3763	0.800916	0.94367	-0.0836454
NXF1 _ 75	7.93079	10.4073	8.78279	0.177009	0.82655	-0.274826
PCDH1 _ 1089	8.81748	8.90269	9.01685	0.1302	0.984118	-0.0230962
HNRNPA2B1 _ 336	8.59975	9.64791	8.93942	0.189222	0.925335	-0.111952
EGFR _ 1081	4.97512	14.5541	13.6484	0.00245298	0.352815	-1.50302
ANXA1 _ 21	7.27074	7.74926	11.5409	0.337019	0.753829	-0.407691
SHB _ 8	7.71982	11.0681	8.47867	0.253605	0.789881	-0.340293
SEC16A _ 1031	6.0691	8.59601	4.38278	0.860307	0.935233	-0.0966017
APLP2 _ 755	9.20401	11.2259	5.04728	0.762656	1.13119	0.177841
LSR _ 551	6.7729	8.38739	14.4289	0.264667	0.59369	-0.752218
OCLN _ 315	8.48326	8.57782	9.76125	0.365871	0.925157	-0.112229
DDR1 _ 484	8.03686	9.46152	7.35875	0.756511	0.955616	-0.0654967
NUP62 _ 422	9.75116	9.88224	7.2544	0.463006	1.13805	0.186561
TYK2 _ 292	6.53169	10.1912	7.29089	0.267088	0.747245	-0.420346
DAPP1 _ 139	8.24632	7.43314	14.4463	0.522724	0.753795	-0.407755
SLC9A1 _ 683	7.80518	10.5683	8.31696	0.283	0.826587	-0.274761
PVRL4 _ 502	7.1309	9.96179	10.6461	0.0114277	0.692056	-0.531039
TNK2 _ 905	9.4414	9.98489	8.83007	0.958503	1.00361	0.00519164
SNW1 _ 459	7.1869	6.6482	13.8666	0.484519	0.700655	-0.513223
PRKCD _ 334	5.04855	6.4846	10.2668	0.220583	0.602764	-0.730336
VANGL1 _ 312	4.92829	3.87052	7.07924	0.765794	0.900163	-0.151741
CTTN _ 446	8.14271	8.08341	7.84425	0.27334	1.02246	0.0320458
FNBP1L _ 506	6.18428	9.11982	10.2661	0.0256598	0.638018	-0.64833
SHANK2 _ 34	6.59889	8.53199	8.23844	0.00668354	0.786967	-0.345624
PARD3 _ 1080	6.5305	8.98004	11.3382	0.0913493	0.642821	-0.637512
EPB41L4B _ 493	6.50092	8.67854	18.9413	0.290367	0.470743	-1.08699
EGFR _ 1092	7.20889	12.273	11.9985	0.000775421	0.594021	-0.751414
CEBPB _ 139	6.67182	10.1835	5.9797	0.57148	0.825555	-0.276564
GDI2 _ 203	9.86531	6.82718	3.98037	0.0884845	1.82563	0.868398
WRNIP1 _ 111	6.73045	8.07663	15.0154	0.299534	0.582925	-0.778619
PVRL2 _ 454	7.56667	9.33656	12.2455	0.15694	0.701198	-0.512106
MCFD2 _ 135	7.10042	11.8527	12.2183	0.00136883	0.589957	-0.761318
PPP1CB _ 306	6.9364	8.88066	11.8548	0.147395	0.669037	-0.579842
EGFR _ 1069	5.78451	12.9761	13.5054	0.00125757	0.436872	-1.19472
CTNND1 _ 257	5.78493	8.74406	15.5332	0.202136	0.476573	-1.06923
PTPRK _ 850	9.69498	7.59734	12.0813	0.95452	0.985329	-0.0213224
CXADR _ 318	7.42664	9.71265	10.3786	0.0157824	0.739291	-0.435785
SLITRK6 _ 820	6.80468	9.93697	14.128	0.130056	0.565526	-0.822336
NUDCD2 _ 145	5.45484	7.25827	14.351	0.270456	0.504861	-0.986043
TRIM29 _ 93	9.62605	15.1847	5.8637	0.86498	0.914661	-0.128692
SPRY3 _ 27	9.82411	10.3522	11.173	0.149513	0.912803	-0.131625
RASA3 _ 822	9.06472	11.0842	8.45603	0.645135	0.927802	-0.108111
FLOT1 _ 223	8.82729	9.57194	11.7687	0.235361	0.827274	-0.273563
CTNND1 _ 241	7.02506	10.027	13.8982	0.125408	0.587252	-0.767948
PDLIM1 _ 321	7.67052	10.3318	11.9698	0.0511629	0.687888	-0.539754
MAPK14 _ 182	4.62373	9.37523	7.23861	0.0748105	0.556611	-0.845258
HNRNPL _ 92	9.56978	15.014	10.0522	0.35475	0.76356	-0.389186
EGFR _ 998	7.06709	9.17576	16.4386	0.254742	0.551807	-0.857763
FLOT1 _ 238	7.07784	9.24721	12.7898	0.156077	0.642359	-0.638548
ARAP2 _ 77	5.01035	5.55621	7.5897	0.264138	0.762267	-0.391631
GAREM _ 596	9.28788	9.98669	13.8714	0.306904	0.778593	-0.361059
ZMIZ2 _ 103	7.2422	8.83972	10.4985	0.0996434	0.749002	-0.416959
KIRREL _ 621	6.54586	8.8038	12.6722	0.162514	0.609598	-0.71407
NRP1 _ 920	7.5115	8.66934	12.3447	0.244654	0.714904	-0.484179
SLC34A2 _ 17	6.31866	6.45406	19.3868	0.414675	0.489045	-1.03196
AHNAK _ 715	7.29932	8.95108	15.9329	0.278608	0.586668	-0.769383
LSR _ 406	6.7607	9.81725	12.2404	0.0719887	0.613001	-0.706038
API5 _ 497	5.7063	8.03419	14.1093	0.219373	0.515392	-0.956259
C6orf132 _ 1142	8.31742	10.3251	10.4236	0.000572322	0.801728	-0.318815
ARVCF _ 259	7.79379	9.25439	12.1294	0.181335	0.728943	-0.456121
SLC12A2 _ 956	5.99038	7.58884	7.65466	0.000406737	0.785958	-0.347475
OCLN _ 337	7.7816	8.89115	11.8028	0.220104	0.752066	-0.41107
SCAMP1 _ 73	4.28959	4.75337	20.8347	0.401081	0.33528	-1.57656
CTTN _ 297	8.06164	10.5187	9.19758	0.11278	0.817765	-0.290243
MYO6 _ 1146	5.74903	10.2829	24.6659	0.244578	0.328997	-1.60385
AHNAK _ 964	7.10876	9.67454	16.2434	0.216833	0.548559	-0.866281
EPB41L2 _ 88	6.27892	8.9615	17.1039	0.238998	0.481781	-1.05355
ITSN2 _ 968	6.10706	8.61526	16.2318	0.239056	0.491571	-1.02453
HBS1L _ 58	7.25546	8.08898	15.5918	0.346128	0.612773	-0.706576
LSR _ 407	8.3496	8.78303	9.77776	0.20218	0.899703	-0.15248
RBMX _ 206	8.5945	12.5216	6.24804	0.824602	0.915786	-0.126918
OCLN _ 368	7.28595	6.92491	14.3272	0.462065	0.685669	-0.544417
SLC7A11 _ 15	7.64059	7.63732	8.77808	0.424861	0.930905	-0.103295
SPATA2 _ 433	7.40474	10.5804	14.5194	0.120592	0.590025	-0.761153
AHNAK _ 5836	6.8446	9.36893	15.2222	0.203567	0.556673	-0.845097
MARVELD2 _ 23	6.57889	9.57217	13.5202	0.128242	0.56979	-0.811499
CTTN _ 154	7.64799	11.107	10.0293	0.0324047	0.723681	-0.466574
EMD _ 94	7.76321	8.41578	9.56736	0.166505	0.863387	-0.211921
TMEM134 _ 57	8.29367	9.01566	11.587	0.258789	0.805105	-0.312751
C11orf52 _ 103	7.96912	15.657	10.964	0.150579	0.598709	-0.740074
EGFR _ 869	3.74329	4.31672	9.41507	0.345284	0.5452	-0.875142
LPHN2 _ 1448	5.93257	7.90269	13.7503	0.236143	0.547968	-0.867838
TJP2 _ 1038	7.68059	10.0563	11.3817	0.0444235	0.716537	-0.480886
TUBA1B _ 272	5.7882	10.9453	5.20363	0.509327	0.716852	-0.480253
OTUD4 _ 438	4.34896	5.76	15.8414	0.32897	0.402656	-1.31238
SLC12A2 _ 957	5.98897	5.01215	5.78989	0.269687	1.10886	0.149076
ARHGEF5 _ 1140	6.9873	10.0353	14.0931	0.129418	0.579174	-0.78793
RBM3 _ 155	5.35124	11.286	13.2799	0.0200635	0.435664	-1.19871
LASP1 _ 186	7.40504	7.52639	12.4962	0.404306	0.739669	-0.435048
MAP4K3 _ 366	8.68655	7.14202	13.3718	0.664215	0.846899	-0.239738
NSFL1C _ 169	6.06846	9.14213	12.6364	0.110079	0.557289	-0.843502
EPB41 _ 660	7.78669	10.8621	7.06618	0.598278	0.868647	-0.203159
EPB41L1 _ 68	8.34804	10.5126	10.8749	0.00591231	0.780648	-0.357256
CAPRIN1 _ 670	5.53454	7.59717	8.53628	0.0327083	0.686096	-0.543518
PKP4 _ 482	6.92478	13.1251	10.1239	0.0886059	0.595704	-0.747331
PVRL2 _ 513	3.71555	11.5872	13.2006	0.00853021	0.299788	-1.73798
ANO1 _ 7	7.05582	8.96825	11.6259	0.134887	0.685227	-0.545345
ANK3 _ 883	7.13105	9.16975	9.1953	3.87942e-05	0.776589	-0.364777
RIPK1 _ 384	6.43	7.11126	12.2165	0.332756	0.665363	-0.587786
CDV3 _ 95	4.85048	6.0258	16.9785	0.348456	0.421703	-1.2457
EPHA5 _ 833	4.868	8.43342	10.412	0.0440808	0.516625	-0.952811
CBLB _ 709	6.01285	11.9285	10.8726	0.0094655	0.527418	-0.922981
PKP4 _ 114	6.94024	9.38607	10.5312	0.0341495	0.696907	-0.520962
TAGLN2 _ 8	6.53665	9.33583	11.7964	0.0819275	0.618644	-0.692818
AHNAK2 _ 4795	7.98839	9.40153	12.9789	0.215334	0.713873	-0.486262
MAPK12 _ 185	3.83182	9.49875	5.72184	0.183391	0.503505	-0.989922
AHNAK _ 836	6.66032	9.6218	15.5148	0.182813	0.52993	-0.916127
MLLT4 _ 1229	6.77186	9.12303	13.466	0.172696	0.59957	-0.738
DBNL _ 162	7.26497	9.24834	9.10563	0.00138986	0.791651	-0.337064
PXN _ 88	4.57348	4.29274	12.3057	0.450579	0.551072	-0.859687
MEPCE _ 152	5.23189	9.42794	10.3239	0.00917767	0.529761	-0.916586
AHNAK _ 5089	5.77951	8.80837	15.9245	0.20534	0.467354	-1.09741
CLINT1 _ 293	5.22396	7.8043	15.9834	0.244474	0.439216	-1.187
FER _ 402	5.91993	7.9793	6.95801	0.0936868	0.792636	-0.335269
ABI1 _ 215	4.7475	8.32332	10.2881	0.0434455	0.51017	-0.970951
NOSIP _ 14	5.82001	10.272	14.6446	0.0935054	0.46716	-1.09801
PXN _ 118	4.47184	5.36449	10.3389	0.307137	0.569537	-0.812138
CTNND1 _ 228	3.66363	8.96653	22.1699	0.213123	0.235328	-2.08726
CDC42BPB _ 1638	7.73392	9.36109	9.85389	0.0168595	0.804988	-0.31296
MAPK13 _ 182	5.94687	8.07471	5.63568	0.53401	0.867499	-0.205066
TJP1 _ 1066	8.41035	9.04074	12.0847	0.292902	0.796228	-0.328746
ZC3HAV1 _ 410	7.57909	8.52794	8.39432	0.00568846	0.895754	-0.158826
AHCYL1 _ 28	6.08843	7.56919	12.7261	0.256086	0.599983	-0.737006
WDR70 _ 618	5.56108	7.70927	15.7469	0.264652	0.474168	-1.07653
CTNND1 _ 904	6.1755	10.0258	13.9375	0.0972075	0.515411	-0.956204
FRK _ 387	3.7019	4.3664	11.7978	0.359712	0.458036	-1.12647
EPB41L2 _ 623	5.1309	6.19396	19.983	0.367713	0.392017	-1.35101
PAG1 _ 341	4.3438	5.95499	7.94245	0.11991	0.625123	-0.677788
EIF4G1 _ 1084	6.47455	6.73597	6.16886	0.944878	1.00343	0.0049414
GAB2 _ 409	7.72025	13.4622	9.5049	0.197527	0.672286	-0.572852
CAV1 _ 6	6.7692	11.8736	12.4313	0.00267197	0.557022	-0.844193
HNRNPA2B1 _ 262	8.86734	13.3547	7.06912	0.710443	0.868335	-0.203677
ERBB2IP _ 1164	8.05436	9.51973	11.1055	0.104335	0.78102	-0.356569
TBCB _ 98	7.63321	9.04896	11.2431	0.149119	0.752334	-0.410555
PLEKHA6 _ 492	4.84793	8.85653	10.7823	0.0355244	0.49371	-1.01826
PKP2 _ 166	4.01738	5.87546	18.2302	0.323025	0.333313	-1.58505
RCN2 _ 311	6.4581	7.65326	14.5384	0.310264	0.582028	-0.780838
PLCG1 _ 1254	6.52858	9.22185	16.4133	0.222395	0.509346	-0.973283
SPRED2 _ 251	6.52285	9.19129	14.3228	0.178164	0.554803	-0.849953
YES1 _ 426	3.57605	6.59348	7.65108	0.0215205	0.502094	-0.993971
ICK _ 159	10.1936	8.34805	5.59826	0.143934	1.46183	0.547778
CBLB _ 763	4.8676	13.3674	15.3272	0.0105169	0.339269	-1.5595
CTTN _ 384	5.33617	5.5024	7.23678	0.355621	0.837757	-0.255396
CDV3 _ 190	5.01786	6.02965	18.5909	0.36545	0.407616	-1.29472
CDCP1 _ 806	3.39634	4.78183	9.99336	0.265277	0.459736	-1.12112
PKP4 _ 1168	5.11521	8.86985	16.031	0.177046	0.410846	-1.28333
MPZL1 _ 241	5.10757	9.13291	11.1815	0.0387706	0.502851	-0.991796
EPB41L1 _ 864	6.50215	9.39122	14.1886	0.158314	0.551501	-0.858564
ARHGEF5 _ 656	4.83402	14.0819	8.29973	0.158948	0.431963	-1.21102
IFNAR1 _ 527	5.6088	7.76972	3.38603	0.990023	1.00554	0.00797704
MARVELD2 _ 137	5.10011	9.57208	9.55755	2.64602e-06	0.533216	-0.907208
PCDH1 _ 1020	4.81482	8.98764	20.9898	0.232096	0.32123	-1.63832
USP24 _ 101	4.91094	7.08283	24.4092	0.337525	0.311885	-1.68091
CCDC50 _ 455	5.23205	6.00523	23.4172	0.389954	0.35565	-1.49147
CHRM3 _ 365	3.36273	4.804	13.163	0.31089	0.374322	-1.41765
CTNND1 _ 193	6.00794	9.50189	14.2297	0.131483	0.506324	-0.981867
CTNND1 _ 174	5.09417	8.96878	18.8568	0.216407	0.36615	-1.44949
LYN _ 194	7.65659	5.87098	6.7735	0.0978676	1.21106	0.276266
PKP3 _ 195	5.98996	6.76854	17.0203	0.368469	0.503594	-0.989666
ARHGEF5 _ 1100	3.14789	14.3071	17.0481	0.0117537	0.200789	-2.31625
RASA1 _ 460	4.87108	7.62862	15.2699	0.227256	0.425449	-1.23294
KIAA1522 _ 300	4.26434	5.86338	15.8806	0.317868	0.392232	-1.35022
MAPK1 _ 187	5.25729	11.4681	12.1706	0.00285327	0.444804	-1.16876
PTRF _ 156	8.41732	8.26471	8.36685	0.185106	1.01221	0.0175106
PLCG1 _ 771	5.44143	8.18867	18.4551	0.264508	0.408458	-1.29174
PTPN6 _ 566	5.24884	6.51226	16.7525	0.3387	0.451228	-1.14807
EPHA4 _ 779	3.32296	5.88031	6.19723	0.00338716	0.550271	-0.861786
PAG1 _ 359	2.62475	4.07807	8.03952	0.225103	0.433213	-1.20685
MLLT4 _ 1496	5.0428	6.9053	18.5845	0.317955	0.395673	-1.33762
FUS _ 468	5.80431	8.70796	13.4204	0.155248	0.524605	-0.930697
DDX17 _ 580	5.30913	8.19806	15.3366	0.212108	0.451177	-1.14824
PKP4 _ 1156	4.39359	6.73846	17.7039	0.28955	0.359506	-1.47591
CD46 _ 384	2.5456	3.87884	6.82862	0.197225	0.475481	-1.07254
SYK _ 323	5.98441	16.3756	8.53047	0.240907	0.480558	-1.05722
MPZL1 _ 263	4.65876	14.8236	7.46432	0.220049	0.418053	-1.25824
CDV3 _ 244	3.82107	5.87136	20.8498	0.330753	0.285996	-1.80594
MAPK3 _ 204	5.04328	15.3974	11.1561	0.0603906	0.379858	-1.39647
EPB41L1 _ 796	3.52433	3.13462	12.1311	0.457467	0.461732	-1.11487
PTPN11 _ 584	5.00833	12.123	13.6214	0.00895473	0.389082	-1.36185
PRKCD _ 333	3.1093	4.39072	11.0198	0.299898	0.40353	-1.30925
GAB1 _ 689	4.00441	17.0613	13.5239	0.023681	0.261853	-1.93317
CFL1 _ 68	3.76041	19.0045	6.65373	0.279699	0.293115	-1.77046
GAB2 _ 643	3.28898	20.0373	13.2074	0.059776	0.197865	-2.33741
PTPN11 _ 546	3.51008	19.4783	11.1107	0.106318	0.229499	-2.12344
