# Supplementary material for: Time-resolved phosphoproteomics reveals scaffolding and catalysis-responsive patterns of SHP2-dependent signaling
Source: eLife journal article supplement (doi:10.7554/elife.64251), 2021-03-23
Supplement: supp [file elife-64251-supp-v1.zip › elife_poa_e64251_Figure_2_figure_supplement_2_source_data_3.xlsx]

## Sheet: Sheet1
pY site	SHP099_30	DMSO_30	Washout_30	p-value	FC	log2FC
HSP90AB1 _ 226	7.80609	8.64264	5.03863	0.645727	1.14114	0.19047
HSP90AB1 _ 255	8.25926	8.45209	5.0423	0.468705	1.2241	0.291725
HMGA1 _ 36	7.95093	9.62566	4.3667	0.75132	1.13647	0.184555
NUP214 _ 667	9.97508	8.98121	5.12958	0.268754	1.41382	0.499601
CDK16 _ 249	7.64657	9.20378	4.20663	0.742568	1.14039	0.189532
LSM14A _ 220	8.15494	8.64224	5.36237	0.554943	1.16461	0.219844
HSP90AA1 _ 353	7.06382	8.26474	4.39271	0.740697	1.11615	0.158534
MICALL1 _ 640	4.34425	4.38882	2.81114	0.445018	1.20674	0.271118
ABI1 _ 183	7.45738	8.54051	5.11958	0.748966	1.09185	0.126773
EPHA5 _ 833	4.69239	5.55171	11.6395	0.328286	0.545905	-0.873277
LARP4B _ 718	6.02253	8.19395	3.70678	0.977264	1.01213	0.0173901
HSP90AA1 _ 385	6.93307	8.80681	4.94312	0.978735	1.00845	0.0121431
SPTBN1 _ 2102	8.97689	6.79408	11.0837	0.987478	1.00425	0.00611743
PARD3 _ 489	7.54561	10.4572	8.98964	0.0972465	0.776024	-0.365827
ALDOA _ 258	6.98629	10.228	2.39048	0.878729	1.10732	0.147066
PKM _ 175	9.91232	8.8701	5.00803	0.263514	1.42848	0.514481
ANXA2 _ 256	22.3221	10.7147	9.92142	0.00109002	2.1634	1.1133
PRKCD _ 374	8.16591	9.48536	3.9643	0.653708	1.21429	0.280116
MPP5 _ 245	3.77086	7.36604	6.79342	0.00740393	0.532627	-0.908802
YES1 _ 223	8.97877	7.48799	4.56803	0.180663	1.48951	0.574836
CALD1 _ 202	10.7247	9.33526	6.90102	0.165527	1.32108	0.401718
PKM _ 105	7.01181	8.87216	4.67911	0.920596	1.03486	0.0494306
YES1 _ 222	8.19116	7.48014	6.05578	0.183724	1.21029	0.275347
CRKL _ 251	6.2226	6.92319	12.9268	0.342717	0.626964	-0.673546
SYK _ 323	6.16563	5.44245	7.81898	0.73327	0.92986	-0.104915
PGM2 _ 165	7.91653	6.55063	3.08543	0.21562	1.6431	0.716425
EPHA2 _ 575	6.92225	8.74596	12.4645	0.186132	0.65272	-0.615464
ADAM9 _ 769	5.58115	9.10009	8.65378	0.00455316	0.628725	-0.669499
MLLT4 _ 1181	7.70902	10.0542	6.42861	0.79668	0.935404	-0.0963387
GIGYF2 _ 26	9.11259	9.93	5.92607	0.614028	1.14941	0.200898
SNRNP70 _ 226	7.93158	8.49347	6.14794	0.654379	1.08344	0.115625
SRRT _ 544	8.98826	8.60178	6.72807	0.293315	1.17265	0.22977
TCOF1 _ 583	10.0453	7.18708	3.41274	0.12839	1.89538	0.922486
TRA2A _ 202	8.77724	6.96554	6.89559	0.000358496	1.26645	0.340794
PKP2 _ 626	7.33715	7.90975	7.52803	0.183487	0.950544	-0.0731741
SRP14 _ 27	9.61736	7.36363	4.91086	0.104989	1.56705	0.648049
STMN1 _ 38	9.1524	9.01853	7.10492	0.372442	1.13529	0.183061
CDK16 _ 254	8.9427	9.22891	4.15154	0.468548	1.33668	0.418655
MAGI1 _ 373	8.29181	7.16953	6.78021	0.0211579	1.18881	0.249521
PHACTR4 _ 301	5.75994	7.89487	4.62304	0.789157	0.920273	-0.119867
MYH9 _ 1943	8.32398	8.70318	6.27438	0.562661	1.11153	0.152543
TES _ 251	7.5551	7.15045	4.90316	0.306812	1.25358	0.326057
PDHA1 _ 331	7.46414	8.5239	1.90058	0.566663	1.43204	0.518073
FAM20B _ 138	9.37226	7.90856	4.91239	0.186662	1.46202	0.547967
SLTM _ 553	7.72398	9.08335	5.38258	0.815581	1.06789	0.0947575
ACTB _ 218	8.01974	8.38004	5.65521	0.538573	1.1428	0.192572
BAIAP2L1 _ 274	7.48424	8.13434	8.0846	0.00157879	0.922902	-0.115751
SIN3A _ 277	9.56282	7.94218	5.80173	0.128412	1.39157	0.476717
CLMN _ 635	8.92162	7.54132	5.38129	0.150402	1.38078	0.465481
RAB11FIP1 _ 435	8.90142	8.96727	6.63479	0.445003	1.14106	0.190371
ANXA2 _ 206	10.2695	9.5477	10.0469	0.199046	1.04819	0.0679062
PTTG2 _ 165	5.91655	9.78652	3.31901	0.86221	0.90291	-0.147346
G3BP2 _ 225	8.5757	8.56973	4.56178	0.421505	1.30613	0.385293
GMDS _ 327	7.82287	9.63327	5.6243	0.931694	1.02544	0.0362448
PNN _ 66	6.18662	9.87107	9.04029	0.0157656	0.654276	-0.612029
CLDN10 _ 207	14.4375	19.4634	16.3797	0.15233	0.805592	-0.311878
TP53BP1 _ 1099	7.93589	9.50203	5.75827	0.885269	1.04007	0.0566807
APLP2 _ 755	6.96182	9.17788	4.36925	0.94472	1.02779	0.0395488
AFAP1L2 _ 411	5.99779	9.1519	6.23769	0.364293	0.77946	-0.359453
SRRM2 _ 1083	9.08153	7.17181	4.92344	0.114246	1.50167	0.586568
RPL15 _ 59	7.43431	8.87821	5.59522	0.915189	1.0273	0.0388636
ICK _ 159	14.0922	7.91929	7.24836	0.00264627	1.85819	0.893895
CAP1 _ 419	8.38031	8.29348	6.02953	0.394238	1.17019	0.226741
42987 _ 278	16.8658	8.89096	9.41166	0.001137	1.843	0.882054
RPS10 _ 12	7.7253	8.15598	6.46788	0.672762	1.05653	0.0793395
CFL1 _ 68	4.15818	5.46698	7.54402	0.152264	0.63918	-0.645707
SSBP1 _ 99	8.90201	7.70975	6.24151	0.119705	1.27616	0.351807
RPS2 _ 133	8.61874	8.04183	5.76467	0.270872	1.2485	0.320201
FLNA _ 2379	8.23589	8.25794	7.15	0.438277	1.06905	0.0963228
PGK1 _ 203	6.04714	8.61324	4.22878	0.880274	0.941774	-0.0865479
EPHB4 _ 581	6.31898	8.39634	6.88834	0.221326	0.826839	-0.274322
PTK2 _ 938	7.06543	7.96728	6.77968	0.65561	0.958222	-0.0615683
GPRC5A _ 317	9.50649	6.53364	4.70544	0.0511033	1.69169	0.758461
ANXA2 _ 48	16.9133	12.2955	13.357	0.0164486	1.31865	0.399062
EIF5B _ 214	7.71	8.75552	5.91668	0.816887	1.05097	0.0717167
EGFR _ 978	9.904	11.0078	7.87706	0.7959	1.04888	0.0688504
TMEM209 _ 98	8.83568	8.37688	4.52315	0.341294	1.36987	0.454038
EGFR _ 1166	7.36942	8.81636	7.98137	0.132548	0.877431	-0.188643
ACTN4 _ 212	11.2664	9.6479	17.6407	0.612195	0.825725	-0.276267
MARVELD2 _ 469	24.0095	8.39102	8.78686	0.000164695	2.7954	1.48305
ASS1 _ 131	6.32629	8.12535	5.12264	0.861146	0.955057	-0.0663414
PALLD _ 641	13.3558	11.2552	8.4467	0.129957	1.35579	0.439136
ACTB _ 53	13.1623	10.7112	19.7913	0.690618	0.863034	-0.21251
CCNK _ 324	7.98462	8.96479	5.41384	0.698044	1.11062	0.151369
LYN _ 508	5.59395	7.77378	9.05007	0.0476467	0.665002	-0.58857
CDK16 _ 252	7.50296	9.53009	5.78237	0.94226	0.979981	-0.0291739
SET _ 146	7.69203	8.09559	7.52793	0.714167	0.984673	-0.0222829
NUP155 _ 992	9.32861	8.78468	6.79308	0.262095	1.19768	0.260246
PVRL2 _ 513	3.72219	4.94479	8.39817	0.229749	0.557926	-0.841855
PHACTR2 _ 590	9.43765	8.86346	9.62675	0.663989	1.02083	0.0297387
MYH9 _ 754	9.42606	9.37461	9.1653	0.274323	1.01684	0.0240918
ANXA4 _ 165	9.89578	9.7145	9.59857	0.0539921	1.02478	0.0353073
PIK3R1 _ 431	8.68096	12.5435	14.4292	0.0364041	0.643685	-0.635574
POGZ _ 445	9.00095	8.57958	6.26034	0.305955	1.21307	0.278665
CAT _ 84	9.56536	9.03547	5.74993	0.316957	1.29389	0.371717
HIPK3 _ 362	6.82717	8.27467	5.12744	0.943421	1.01882	0.0268995
ANXA2 _ 42	16.0162	6.07455	11.4622	0.114828	1.82659	0.869154
TJP2 _ 292	7.86713	6.9154	12.3778	0.581565	0.815532	-0.294186
SEC61A1 _ 279	15.9673	12.2812	13.1553	0.0176188	1.25546	0.328221
CTTN _ 141	7.75668	9.11585	9.29837	0.00393532	0.842466	-0.247309
SLC12A2 _ 957	16.7219	16.0234	18.5995	0.6921	0.965946	-0.0499851
MYO1D _ 435	10.6128	11.0949	5.8327	0.49988	1.2539	0.326426
NUCKS1 _ 214	7.68519	8.54941	4.23728	0.609891	1.20206	0.265511
AHNAK _ 5731	8.02648	6.61744	7.42682	0.131162	1.14303	0.192858
GOT2 _ 96	10.8203	7.6062	3.64288	0.119867	1.92376	0.943931
SPTAN1 _ 1073	15.7244	10.5303	9.21929	0.0123266	1.59237	0.671178
HDAC4 _ 465	6.82985	8.35137	4.70111	0.883178	1.04652	0.0656022
EGFR _ 1081	5.5996	8.58344	10.0289	0.0359787	0.601709	-0.732861
TOP1 _ 125	6.09315	9.5144	12.5508	0.082893	0.552286	-0.856511
TKT _ 283	8.23311	8.09189	6.06915	0.372536	1.16278	0.217582
NT5DC2 _ 456	7.8254	8.69386	5.80504	0.728628	1.07945	0.110292
IQGAP1 _ 172	7.33187	7.83455	8.77001	0.173706	0.883116	-0.179326
GDI2 _ 442	7.59305	8.76962	7.18243	0.677041	0.951983	-0.0709919
STAM2 _ 291	16.7813	16.4795	13.6087	0.349815	1.11547	0.157652
GAPDH _ 184	9.60896	9.19243	5.42782	0.346404	1.31447	0.394485
RPSA _ 139	9.06482	7.22939	5.97353	0.0592609	1.37315	0.457494
LSR _ 535	7.24533	10.4127	8.44575	0.156528	0.768393	-0.380084
LSR _ 372	8.22073	8.50142	6.48665	0.545617	1.09697	0.133523
CPSF7 _ 494	6.12801	9.25807	9.29142	2.80839e-05	0.66072	-0.59789
LIN7C _ 58	9.76828	7.27846	6.71152	0.0102868	1.39647	0.481783
SLC25A6 _ 81	11.7599	5.87851	5.08635	0.00395753	2.14501	1.10098
CRK _ 108	13.5375	7.71471	7.12208	0.00233668	1.82486	0.867787
INADL _ 393	10.2454	7.76683	6.89194	0.0217723	1.39785	0.483213
EIF1 _ 30	18.2625	11.4892	9.38538	0.0175947	1.74973	0.807134
CTTN _ 334	7.67566	8.40798	9.61064	0.156833	0.85197	-0.231126
SNTB1 _ 87	6.12064	6.47687	6.46886	0.000129271	0.945584	-0.0807225
TWF2 _ 309	17.3991	9.52837	8.28574	0.00531042	1.95341	0.965995
MICALL1 _ 760	16.7573	9.19652	9.46278	0.000321086	1.79613	0.844895
SLC25A6 _ 191	8.23978	10.123	7.01472	0.851923	0.961595	-0.0564982
AHNAK _ 5089	5.99854	8.96117	9.88416	0.0176846	0.636608	-0.651523
CSK _ 64	8.88142	16.3678	7.81918	0.530757	0.734397	-0.445367
SPTAN1 _ 1261	9.43264	9.47272	6.15148	0.432052	1.20744	0.271951
DDX3X _ 266	6.05578	10.2385	7.09311	0.238866	0.698813	-0.517021
ATP1A1 _ 684	6.44698	10.0727	5.66266	0.585409	0.819426	-0.287315
GORASP2 _ 225	9.01038	12.9012	7.40219	0.718362	0.887574	-0.172061
GDI2 _ 203	7.1432	6.96646	5.64261	0.332721	1.13303	0.18018
PARD3 _ 386	8.4989	8.62418	5.70657	0.457151	1.18611	0.246233
PSMA2 _ 97	9.03952	8.2996	6.21308	0.229533	1.24574	0.317004
TEC _ 228	15.2605	9.10227	7.32045	0.0156005	1.85847	0.894113
PEAK1 _ 635	6.56761	3.50176	16.1254	0.658252	0.669237	-0.579411
EPHA2 _ 628	9.24082	10.3161	5.5385	0.637619	1.16569	0.221189
KPNA6 _ 474	11.9039	7.92255	7.7652	0.000375312	1.51761	0.601799
OTUD6B _ 272	6.29166	11.0022	10.9676	1.36053e-05	0.572757	-0.804005
CTNND1 _ 228	4.21943	5.32981	14.2262	0.337845	0.431524	-1.21249
CRKL _ 127	8.45299	8.42458	7.71511	0.393037	1.04748	0.0669212
SHB _ 336	7.86071	10.5987	8.42899	0.267018	0.82624	-0.275367
SF3B4 _ 16	14.6957	8.15284	8.31152	0.000150644	1.78515	0.836046
ISOC1 _ 160	6.20061	8.54718	5.78329	0.557402	0.865374	-0.208604
PFN1 _ 129	8.08106	10.33	7.11502	0.728442	0.926461	-0.110198
CMPK1 _ 49	11.6573	9.97882	10.0996	0.00138932	1.16118	0.215588
RAB7A _ 72	8.80262	8.96324	6.49477	0.476084	1.13891	0.187652
SLC1A3 _ 523	16.9018	30.6756	23.5668	0.102675	0.623195	-0.682245
POLR2G _ 17	6.86736	10.593	6.56053	0.485821	0.800694	-0.320677
STAT3 _ 727	8.76175	7.7618	8.06613	0.0307372	1.10713	0.146818
PKP4 _ 1143	9.83342	8.75111	6.87692	0.163956	1.25843	0.331629
PNP _ 249	11.8546	11.0605	9.77375	0.155033	1.13799	0.186492
SHC2 _ 398	10.4461	9.39307	8.17283	0.112341	1.18937	0.250194
ACTN4 _ 265	12.8245	7.282	7.54235	0.000577974	1.7302	0.790937
MYO1E _ 974	8.24227	9.07949	7.70003	0.850494	0.98242	-0.0255878
GORASP2 _ 222	19.0018	8.68662	15.1406	0.159199	1.59496	0.673523
PTPRA _ 271	10.414	10.3518	7.53002	0.406061	1.16475	0.220026
FNBP1L _ 566	23.1185	12.5054	12.6104	2.47142e-05	1.84095	0.88045
FRK _ 193	8.22448	7.11884	6.21436	0.0749215	1.23368	0.302973
MIA3 _ 1678	10.2739	8.20617	4.54084	0.167116	1.61197	0.688823
CTNNB1 _ 675	8.94089	7.07351	8.18748	0.142927	1.17173	0.228643
CTTN _ 446	6.07483	8.14622	8.55566	0.00799265	0.727443	-0.459094
TNK2 _ 859	10.8077	9.42387	8.80551	0.0317685	1.18575	0.2458
PLEC _ 4642	7.63487	7.96226	9.51238	0.290852	0.873822	-0.194588
RAB11B _ 8	9.59025	8.87928	9.12233	0.0399762	1.06549	0.0915143
EIF1 _ 79	14.9296	8.72887	8.47277	0.000409138	1.73584	0.79563
RABGEF1 _ 673	15.3546	21.0722	16.3691	0.288635	0.820199	-0.285955
HNRNPA2B1 _ 131	20.7118	11.9979	7.96405	0.0335602	2.07512	1.05319
CKS2 _ 17	11.3257	11.858	8.33811	0.557654	1.12157	0.165519
MPP7 _ 417	24.2592	8.33111	8.47524	2.06545e-05	2.88691	1.52953
IQGAP3 _ 1098	9.99795	10.3931	8.99006	0.70495	1.03161	0.0448991
LDLR _ 828	8.33563	7.94422	10.241	0.577534	0.916748	-0.125403
CSNK1A1 _ 322	29.1273	14.394	12.9668	0.00212724	2.12912	1.09026
MYO6 _ 103	5.25375	3.91624	22.1335	0.483444	0.403364	-1.30985
MAPKAPK3 _ 207	6.36471	10.2529	14.6899	0.110523	0.510344	-0.970459
CTNNB1 _ 142	6.46343	11.5552	9.67732	0.0475076	0.608823	-0.715906
USP43 _ 835	7.75165	9.32546	10.7819	0.0871799	0.771026	-0.375148
EGFR _ 693	8.46766	11.3685	8.74347	0.34984	0.842053	-0.248017
SIGIRR _ 402	9.21745	10.3143	10.4162	0.00196483	0.889269	-0.169309
TMEM106B _ 50	9.85126	11.4844	9.25475	0.687685	0.950014	-0.073979
PCBP1 _ 211	8.79166	7.03901	13.7541	0.6798	0.845632	-0.241899
PCDH1 _ 962	10.6934	9.46245	10.4237	0.258848	1.07547	0.104962
EHD1 _ 453	15.8824	9.89386	13.6894	0.163886	1.34692	0.429665
OSBP _ 764	20.2621	9.04981	11.2407	0.0115227	1.99719	0.997975
HNRNPK _ 114	12.7251	11.8583	10.1273	0.1833	1.15758	0.211116
STAT3 _ 539	12.0502	6.48155	10.9973	0.280213	1.37884	0.463452
EGFR _ 1069	4.90377	9.43643	10.273	0.00706294	0.497605	-1.00693
ARHGEF5 _ 656	4.50278	11.6174	9.98456	0.0163914	0.416886	-1.26228
ARHGEF5 _ 1100	2.84779	15.7394	12.1957	0.0244623	0.203886	-2.29417
TYK2 _ 1054	10.3772	7.32578	5.01204	0.067958	1.68218	0.75033
MAPK7 _ 221	12.0459	11.6838	13.3424	0.629946	0.962665	-0.0548938
TNS1 _ 798	3.7893	5.15815	15.9602	0.336711	0.358863	-1.47849
SNAP29 _ 182	6.74276	8.86603	10.7738	0.084145	0.68664	-0.542374
DDX6 _ 473	15.9828	10.8332	24.1037	0.84363	0.914955	-0.128227
PACSIN3 _ 418	12.7069	8.10312	8.2225	0.000172486	1.55669	0.638478
STAP2 _ 250	8.43893	9.15797	7.45474	0.890584	1.01596	0.0228443
PCDH1 _ 1020	3.98983	7.22004	14.6034	0.201632	0.365646	-1.45148
PLCG2 _ 763	10.0699	8.96359	11.0113	0.943108	1.00826	0.0118695
PLCG2 _ 818	39.4151	8.87719	11.5318	0.00205828	3.86253	1.94955
PTTG2 _ 111	9.41849	10.9492	15.2737	0.229771	0.718341	-0.477258
AHNAK _ 61	10.9366	6.25851	14.5658	0.911077	1.05037	0.070893
MARCKS _ 170	3.97011	4.48093	10.2642	0.360411	0.538496	-0.892992
CD46 _ 384	3.21465	5.99705	10.8465	0.164828	0.381708	-1.38946
EGFR _ 869	3.89222	6.02113	12.7077	0.243323	0.415641	-1.26659
EPHA4 _ 779	3.11086	7.27775	7.9677	0.00579523	0.408103	-1.293
ABI2 _ 183	10.3664	7.79805	2.84834	0.178458	1.94741	0.961553
RFC1 _ 156	10.7141	10.6485	3.60909	0.415549	1.50293	0.587774
EGFR _ 1110	8.34298	8.16166	7.42825	0.273662	1.07031	0.0980222
TCOF1 _ 906	9.1149	8.33513	3.44205	0.318015	1.54789	0.630305
FRK _ 387	3.79785	5.86482	15.1158	0.28487	0.362035	-1.4658
ERP29 _ 66	11.1819	9.41668	2.67735	0.267016	1.84916	0.886869
LSM14A _ 216	9.68035	10.4514	5.15747	0.551984	1.24036	0.310763
CTTN _ 384	4.81736	2.73566	4.4757	0.298334	1.33605	0.41797
PXN _ 118	3.78919	4.63284	8.44674	0.28595	0.579406	-0.787353
PAG1 _ 359	3.11186	8.57093	11.3393	0.0385614	0.312589	-1.67766
NCK1 _ 105	8.95575	8.22953	7.40065	0.110547	1.14596	0.196551
EPHA2 _ 594	6.72068	9.5657	5.96737	0.619821	0.865338	-0.208664
DDR1 _ 520	3.89691	5.05953	5.69479	0.0430898	0.724716	-0.464513
ZC3H18 _ 534	10.7363	9.52403	4.96832	0.265169	1.48165	0.567202
CHRM3 _ 365	4.61935	4.83603	17.0066	0.409186	0.422966	-1.24139
OCRL _ 133	10.5775	9.11272	6.86629	0.14773	1.32393	0.404824
BICD2 _ 582	9.17622	10.1183	5.88698	0.634846	1.14665	0.197423
EPB41 _ 660	7.34525	7.1376	7.45782	0.794503	1.00651	0.00936857
PFKP _ 386	9.71133	10.683	6.20812	0.628589	1.14987	0.201476
PTK2 _ 576	5.91448	7.79701	8.90481	0.047994	0.708244	-0.497682
ARAP2 _ 77	4.64246	6.06716	8.12216	0.139701	0.65436	-0.611845
EPHB4 _ 614	9.86968	9.55724	4.42036	0.378597	1.41221	0.497958
TRPS1 _ 905	6.8161	9.77256	5.59382	0.718425	0.887145	-0.172758
HNRNPM _ 64	7.59674	10.994	8.11443	0.30696	0.795119	-0.330758
PRKCD _ 333	2.49147	6.60817	9.64488	0.065545	0.306585	-1.70564
SHB _ 246	7.29376	8.10255	11.9286	0.290761	0.728243	-0.457508
GMDS _ 323	9.60277	10.9756	4.43471	0.620426	1.24628	0.317623
EGFR _ 995	7.3169	6.20935	9.22343	0.815769	0.948229	-0.0766929
CTTN _ 409	8.16011	7.71002	7.85977	0.0375882	1.0482	0.0679117
INSR _ 1189	5.97755	6.04953	5.36546	0.512519	1.04732	0.0666984
CDK5 _ 15	10.7941	11.8681	4.22115	0.546744	1.34178	0.42415
PRKCI _ 136	9.15912	9.07541	4.73906	0.408073	1.32602	0.407101
ABI1 _ 215	4.33968	7.33139	12.8586	0.17272	0.429884	-1.21798
PKP4 _ 281	7.19382	8.98685	6.33009	0.759898	0.939329	-0.0902981
KLC2 _ 582	7.41519	10.5596	6.36352	0.667416	0.876339	-0.190439
PGK1 _ 196	8.53257	8.84003	5.63174	0.503762	1.1792	0.237811
PARD3 _ 1080	4.93599	6.71575	8.89862	0.119208	0.632237	-0.661463
CCDC97 _ 212	11.3729	10.4415	3.96356	0.326784	1.57901	0.659019
PLCG2 _ 1217	7.02152	6.64542	8.92528	0.571819	0.901888	-0.148979
ZFP91 _ 83	10.6167	7.68633	3.05001	0.151861	1.97771	0.983828
PEAK1 _ 1107	4.57593	5.97173	4.41972	0.508239	0.88071	-0.18326
SLC12A2 _ 956	12.8761	15.1628	11.0357	0.923751	0.982963	-0.0247906
CEBPB _ 139	5.83413	8.54746	8.31478	0.00200082	0.691976	-0.531206
KIAA1522 _ 1030	5.60773	7.2821	7.22439	0.000307351	0.773135	-0.371208
PTK2 _ 861	4.22684	5.22583	10.012	0.292085	0.554784	-0.850003
STAM2 _ 371	5.56583	8.48813	24.1269	0.303236	0.341305	-1.55087
FLNA _ 2152	9.3602	17.0178	6.57808	0.686427	0.793375	-0.333926
PARD3B _ 1000	3.59645	5.26347	6.21141	0.0456765	0.626839	-0.673834
MICALL1 _ 391	8.0128	6.9696	4.36451	0.213517	1.41393	0.499707
EPS8L2 _ 570	11.3528	14.1495	5.41747	0.753679	1.1604	0.214621
STAT5A _ 682	7.63703	7.49446	12.256	0.446398	0.773353	-0.370801
CAPRIN1 _ 670	5.284	8.9371	7.77315	0.0340844	0.632426	-0.661031
EIF4G1 _ 1238	7.64149	17.4641	7.64981	0.421998	0.608546	-0.716561
SLC9A1 _ 683	6.59327	7.95255	7.82922	0.00225084	0.835555	-0.259193
CLDN3 _ 214	12.3296	12.0485	6.64904	0.38461	1.31885	0.399276
NSFL1C _ 169	8.23695	10.6868	15.3276	0.176117	0.633261	-0.659128
HGS _ 132	26.0535	12.8992	19.1735	0.0856654	1.62466	0.700135
MPRIP _ 450	10.8272	7.85633	4.23607	0.118415	1.79075	0.840565
KIAA1217 _ 1044	9.46844	12.5921	6.93136	0.926923	0.969955	-0.0440108
OCLN _ 368	10.0072	9.42227	12.1685	0.623901	0.926986	-0.10938
TENC1 _ 493	6.80355	7.74863	6.82863	0.402225	0.933446	-0.0993608
ANKS1A _ 455	5.5096	7.07594	7.14417	0.000453986	0.774902	-0.367915
PEBP1 _ 181	12.7293	8.73194	8.67668	4.71341e-05	1.46242	0.548356
KIRREL _ 638	5.59178	6.92565	11.6739	0.25873	0.60128	-0.733891
SHB _ 96	6.85197	6.53426	6.4426	0.0155216	1.05603	0.0786498
PTK2 _ 575	7.66957	9.54987	6.52293	0.831075	0.954353	-0.0674045
MPZL1 _ 241	5.03918	12.1452	13.9261	0.0121733	0.386569	-1.3712
LSR _ 407	8.47576	9.00174	11.9727	0.308415	0.808199	-0.307217
MAPK10 _ 223	9.59863	10.2771	6.791	0.603513	1.12475	0.169602
PXN _ 88	3.73595	5.41643	15.1445	0.310715	0.363404	-1.46036
MLLT4 _ 1496	4.19634	4.75749	14.4938	0.380771	0.435955	-1.19775
SHANK2 _ 34	5.93639	7.9576	9.88642	0.090413	0.665365	-0.587783
ANK3 _ 883	7.59825	8.593	11.3756	0.228487	0.761018	-0.393997
GAB1 _ 259	5.10565	5.82477	9.97208	0.310367	0.646413	-0.629472
CLDN3 _ 198	7.25639	7.59733	7.00109	0.898963	0.994134	-0.00848759
CTTN _ 154	8.16062	10.1039	9.99539	0.000823589	0.812032	-0.300392
FLNB _ 651	9.00061	8.17498	5.65705	0.239601	1.30142	0.380081
CTNND1 _ 865	7.54691	8.88093	8.7979	0.00102994	0.85378	-0.228064
MEPCE _ 152	4.8011	7.25438	9.11732	0.0680892	0.586512	-0.769767
RNF114 _ 116	7.9559	8.89895	9.05649	0.00588972	0.886182	-0.174324
SRRM2 _ 1014	6.51672	4.96685	6.95311	0.6315	1.09341	0.128838
PFKFB2 _ 466	6.87764	8.32188	5.78471	0.902558	0.975096	-0.0363832
CLTC _ 1096	10.1854	8.70958	4.70636	0.224465	1.5184	0.602553
INADL _ 938	6.54335	7.85069	10.8734	0.203179	0.698925	-0.516791
HIPK3 _ 359	5.49442	7.58073	2.36235	0.859697	1.10517	0.144275
SEC61A1 _ 276	24.3019	14.8809	11.6897	0.0203393	1.82923	0.871239
PSMB2 _ 146	12.0961	9.29013	4.14926	0.171586	1.80009	0.848072
ZYX _ 267	7.46026	10.0297	8.44412	0.154313	0.807657	-0.308186
FAM105B _ 56	5.70519	7.83231	18.8906	0.300386	0.426988	-1.22773
PDZK1IP1 _ 83	7.01321	10.0098	6.02524	0.664238	0.874735	-0.193082
EIF4G1 _ 1084	4.38716	7.22261	7.19245	2.85809e-05	0.608691	-0.716218
KIAA1549L _ 1417	10.2577	11.1194	8.14366	0.714793	1.06501	0.0908657
CRKL _ 207	7.05984	10.7143	5.09981	0.791299	0.892854	-0.163503
PPP1CA _ 317	7.05909	7.86831	8.46925	0.0661266	0.864155	-0.210639
SLC34A2 _ 17	6.7042	6.98616	16.8523	0.40127	0.56247	-0.830153
LYN _ 194	6.52906	5.53094	6.58999	0.469548	1.07732	0.107447
ROCK2 _ 722	7.97315	8.04055	7.53797	0.540435	1.02361	0.0336638
SRRM1 _ 769	11.8775	10.7547	6.11319	0.27612	1.4083	0.493952
SHB _ 8	8.06792	9.46117	11.8167	0.160731	0.758339	-0.399086
DAPP1 _ 139	5.34873	6.61669	14.0463	0.311838	0.51771	-0.949783
BCS1L _ 181	9.8783	8.42555	5.51083	0.183934	1.41763	0.503479
GGT6 _ 10	8.93149	10.6671	12.7875	0.118726	0.761595	-0.392903
SOCS4 _ 30	8.64344	7.62794	4.93431	0.22152	1.3761	0.460584
CCNYL1 _ 105	7.97061	8.59794	7.56331	0.851292	0.986385	-0.0197771
ZC3HAV1 _ 410	7.43207	7.97697	11.7339	0.326062	0.754107	-0.40716
ABL2 _ 568	7.74299	7.57716	6.77256	0.293402	1.07918	0.109938
SSBP1 _ 73	7.73534	7.85027	13.4944	0.40729	0.724802	-0.464342
ACLY _ 481	9.41263	9.8509	4.75293	0.494716	1.28906	0.366324
SNTB2 _ 203	10.1	7.23411	7.57901	0.00407436	1.36366	0.447482
FER _ 402	6.32934	8.02245	8.44804	0.0122372	0.768568	-0.379756
VAV2 _ 442	15.0616	11.0857	8.60489	0.0521624	1.52982	0.613365
OTUD5 _ 64	9.22807	7.83317	3.30197	0.247536	1.65747	0.728982
HSP90B1 _ 678	11.0202	8.10505	6.87082	0.029193	1.47173	0.557512
SNX16 _ 86	8.31146	6.88414	8.39568	0.467987	1.0879	0.121546
PKP4 _ 114	5.96878	6.93169	10.465	0.262353	0.686195	-0.54331
SLC39A10 _ 596	9.23858	9.1622	6.14838	0.40363	1.20682	0.271213
AKAP2 _ 1009	11.87	10.4874	6.65767	0.227207	1.38465	0.469522
ZNF185 _ 195	7.75399	7.59938	4.37486	0.387469	1.29511	0.373077
PLCG2 _ 753	6.32424	7.50181	15.3041	0.322725	0.554613	-0.850445
SLITRK6 _ 820	4.9907	5.35952	10.4119	0.370418	0.632879	-0.659999
RPS16 _ 82	7.50143	8.19644	5.38457	0.663319	1.10469	0.143647
ZYX _ 344	7.43675	11.4582	11.4236	1.86333e-05	0.650014	-0.621456
ANK3 _ 1459	6.81503	6.27567	9.26738	0.58801	0.876923	-0.189478
DYNLL1 _ 65	18.6794	12.9269	8.29853	0.0733615	1.76009	0.81565
SRC _ 222	9.06357	6.35157	16.9327	0.674171	0.778515	-0.361203
XRCC1 _ 453	12.5339	8.46621	3.22124	0.125399	2.14485	1.10087
CTNND1 _ 296	8.32767	7.84407	8.13658	0.147482	1.04222	0.0596595
TAB1 _ 391	8.11927	7.64418	11.1511	0.541786	0.863969	-0.210948
TLN1 _ 70	12.1683	10.0306	10.0506	2.19224e-05	1.21191	0.277279
PDZK1IP1 _ 85	9.01531	9.76824	6.07433	0.613672	1.13811	0.186642
PLEKHS1 _ 209	4.28978	5.38457	6.56471	0.10389	0.717999	-0.477947
RASA1 _ 460	3.61969	6.53129	16.0238	0.247988	0.320964	-1.63951
LMNB1 _ 138	9.42096	8.70409	4.94351	0.301279	1.3806	0.465298
PKM _ 370	8.88007	9.11485	5.37178	0.474043	1.22597	0.293921
SLC6A8 _ 5	8.27315	8.49478	7.7155	0.708351	1.02073	0.0296002
DBNL _ 162	8.09226	11.0605	10.014	0.0428715	0.767966	-0.380886
CYCS _ 98	10.1172	8.43422	7.51334	0.0431776	1.26881	0.343479
ZC3HAV1 _ 299	6.48761	8.4018	11.9241	0.172172	0.63836	-0.647558
INPPL1 _ 1135	5.87111	6.75082	15.3153	0.351306	0.532138	-0.910128
EPN3 _ 393	10.3563	13.4201	5.08858	0.816143	1.11907	0.162304
TBCB _ 98	6.87626	9.21737	11.7325	0.103503	0.656449	-0.607245
RBM3 _ 127	7.13009	7.49479	5.85234	0.634161	1.06841	0.0954632
EEF1A1P5 _ 86	9.70106	6.90398	5.9742	0.0197131	1.50659	0.591286
CAST _ 288	10.3326	10.3692	5.15277	0.428093	1.33135	0.412887
RBM15 _ 333	6.90252	8.00618	5.85852	0.98036	0.995697	-0.00622166
TRIM29 _ 93	10.2323	11.5009	4.03315	0.576968	1.3174	0.397696
SNW1 _ 176	6.8966	8.23448	9.33543	0.0754817	0.785046	-0.349151
PTRF _ 308	13.5929	10.6753	11.6368	0.0367837	1.21843	0.285025
CHAMP1 _ 282	9.73178	10.0188	5.05194	0.46976	1.29148	0.36903
CBFB _ 85	11.15	8.13659	9.49477	0.0752108	1.26479	0.338896
HNRNPA2B1 _ 331	11.0421	7.10295	3.39899	0.08885	2.10287	1.07236
OCLN _ 325	8.8918	7.25972	15.2559	0.613979	0.789834	-0.340379
MAPKAP1 _ 497	13.8967	9.67396	7.9401	0.0278083	1.57791	0.658014
CIC _ 277	7.91974	10.8936	8.56074	0.261377	0.814188	-0.296566
CDKL5 _ 171	7.71862	7.24635	6.72182	0.107347	1.10517	0.144272
NUP62 _ 422	9.75071	8.30845	7.71322	0.0280355	1.21719	0.283554
CHAMP1 _ 204	8.71729	10.6978	7.20135	0.906469	0.974048	-0.0379351
TNK2 _ 905	5.62213	6.22105	5.65307	0.382946	0.946955	-0.0786315
SEC16A _ 1031	4.42284	8.03173	23.9255	0.283123	0.276798	-1.8531
CLTC _ 430	11.8922	9.00306	8.20023	0.0145573	1.38255	0.467328
PKP4 _ 1156	3.22428	6.86875	13.1252	0.162787	0.322525	-1.63252
TJP2 _ 1038	8.21787	7.26859	9.4044	0.921693	0.98577	-0.0206769
VTI1B _ 115	9.10953	7.93421	6.25126	0.138751	1.28435	0.361035
KIF23 _ 769	8.14482	9.04226	11.2467	0.21131	0.802883	-0.316737
DSG2 _ 1013	7.41198	10.1311	15.3706	0.178441	0.581293	-0.782662
IQSEC1 _ 343	5.93078	7.96691	12.2468	0.190269	0.586809	-0.769038
SYNPO _ 804	7.17565	8.24448	6.68356	0.747217	0.961365	-0.0568434
NPDC1 _ 249	9.71699	7.81748	5.73244	0.105978	1.43425	0.520298
RASA3 _ 822	6.56449	8.08084	6.42307	0.494117	0.905203	-0.143687
CTTN _ 297	7.83326	8.44998	5.83654	0.65021	1.09659	0.133029
CYSTM1 _ 64	9.34686	8.5658	9.22191	0.301373	1.05094	0.0716736
ERBB2IP _ 1164	6.23078	8.30004	10.3456	0.09421	0.668334	-0.581358
CDV3 _ 190	4.97465	6.12229	21.8578	0.370461	0.355585	-1.49173
RBMX _ 206	7.85433	12.3659	5.99643	0.717411	0.855484	-0.225188
MUC1 _ 1252	8.3295	8.07572	10.2717	0.522354	0.907974	-0.139277
HNRNPH2 _ 266	6.83736	7.7326	6.21703	0.872783	0.980293	-0.0287149
ZNF185 _ 85	7.91714	7.81688	6.72975	0.357915	1.08852	0.122366
TYK2 _ 433	8.1036	7.96795	9.25665	0.512566	0.940934	-0.0878351
SRP68 _ 364	9.4389	7.74234	9.30331	0.361354	1.10748	0.147287
EIF2S2 _ 298	12.8962	8.69552	6.93352	0.0287657	1.65029	0.722718
POLA2 _ 141	8.43305	10.3684	5.87413	0.902358	1.03839	0.054351
LSR _ 328	7.61541	10.4486	27.0759	0.311984	0.40589	-1.30084
_ 28	7.99859	7.36791	7.09313	0.030538	1.10623	0.145647
PLIN3 _ 95	8.54164	11.2678	14.6801	0.121705	0.658369	-0.603031
VTI1B _ 68	15.1696	10.0506	9.51691	0.00244583	1.55049	0.632722
NOSIP _ 14	5.65986	9.36518	10.105	0.00813858	0.581388	-0.782427
KIAA1522 _ 300	4.52997	5.44093	24.5176	0.387606	0.302415	-1.7254
SRRM2 _ 1492	7.53817	7.52017	8.04284	0.450093	0.96873	-0.0458339
HSP90AB1 _ 484	8.26978	8.20561	7.68202	0.339192	1.04103	0.0580176
PI4KA _ 633	10.1454	10.1302	6.65402	0.419301	1.20892	0.273718
CTNND1 _ 288	8.254	7.46923	8.42398	0.585604	1.03868	0.0547555
BCLAF1 _ 284	8.92469	6.64911	7.48779	0.0474331	1.26261	0.336407
CC2D1A _ 207	7.48834	8.81479	8.57382	0.00983503	0.861292	-0.215426
EMD _ 59	7.4469	8.21811	8.41084	0.0121144	0.895654	-0.158986
API5 _ 497	6.95007	9.52965	18.8051	0.259934	0.490569	-1.02747
SERINC5 _ 345	12.2853	7.62445	5.35173	0.0363422	1.89351	0.921062
SSBP1 _ 101	8.41256	9.92367	12.4047	0.1568	0.753531	-0.408261
MINK1 _ 906	6.63504	6.60418	8.82019	0.433522	0.860332	-0.217034
SHB _ 114	7.70441	7.11983	8.56297	0.866948	0.98253	-0.0254271
EMSY _ 173	13.9501	9.09472	4.72996	0.0841929	2.01815	1.01303
SLX4 _ 467	9.98639	9.24192	7.79274	0.179821	1.17248	0.229562
SIPA1L3 _ 1411	10.6303	10.5302	9.46014	0.357079	1.06354	0.0888806
CRK _ 190	10.1939	8.71698	8.92306	0.00557804	1.15577	0.208851
ARFGAP2 _ 278	7.52971	9.06719	10.2124	0.0663919	0.781106	-0.35641
ZC3H18 _ 398	10.9801	9.26552	5.36345	0.201048	1.50114	0.586056
IRF2BPL _ 69	6.20682	14.7205	6.59191	0.387871	0.582461	-0.779767
SLC12A4 _ 61	8.49542	8.78306	11.9657	0.359098	0.818884	-0.288269
PAG1 _ 341	3.72994	7.68909	9.19695	0.0246467	0.441777	-1.17861
PLEKHA1 _ 345	5.11122	4.93424	18.5428	0.432792	0.435423	-1.19951
SLC15A1 _ 697	8.38431	8.29872	5.81048	0.397069	1.18849	0.249127
ARHGEF6 _ 488	9.09723	8.35111	7.47597	0.113797	1.14958	0.201104
LDLR _ 845	9.26741	10.0134	9.1174	0.574385	0.968847	-0.0456595
DLG5 _ 429	14.8479	10.9341	7.27069	0.0883756	1.6312	0.705933
TOLLIP _ 83	10.7715	9.31122	6.01977	0.199743	1.40519	0.490766
HCFC1 _ 411	8.46487	9.04373	6.72939	0.666808	1.07333	0.102091
SPTAN1 _ 1020	12.7784	8.55151	10.9059	0.122264	1.31348	0.393389
PRKD2 _ 378	8.37557	8.06501	8.16806	0.0373601	1.03191	0.0453239
ACTA2 _ 71	10.1988	10.2721	5.32611	0.434234	1.30768	0.387015
PTBP3 _ 133	8.71192	7.78675	9.54476	0.962891	1.00533	0.00766471
MYO1E _ 961	7.5068	6.31301	4.74632	0.12761	1.35755	0.441007
HSPD1 _ 227	10.9021	8.40206	6.11731	0.085881	1.50174	0.586632
NAALADL2 _ 106	11.8448	12.4591	11.4232	0.869591	0.991932	-0.0116873
SLC1A5 _ 524	15.8004	11.265	6.41291	0.103021	1.78759	0.838015
PTPN6 _ 566	5.22167	4.97427	17.5714	0.438068	0.463208	-1.11027
ARHGAP35 _ 1058	5.58733	6.65624	7.81903	0.104937	0.771983	-0.373359
TJP3 _ 188	9.79962	7.57056	6.95027	0.0145929	1.34973	0.432674
CTNND1 _ 193	5.92573	6.08838	7.84806	0.357785	0.850393	-0.233799
EPB41L1 _ 68	7.02368	7.21772	9.80466	0.369088	0.825229	-0.277133
TANC1 _ 1827	9.24311	8.50299	11.2674	0.687928	0.935046	-0.0968903
TRAF4 _ 212	9.64498	8.5774	9.01737	0.0612384	1.09635	0.132704
AHNAK2 _ 4795	6.88999	9.22879	11.262	0.0808207	0.672497	-0.5724
LPHN2 _ 1448	7.07517	8.92274	12.0581	0.161234	0.674441	-0.568236
SNRPC _ 12	11.0761	11.3492	8.0608	0.492062	1.14128	0.190652
DDX3X _ 301	6.76114	6.37856	11.6288	0.482956	0.750933	-0.413244
CTNNB1 _ 489	10.8086	8.07091	6.24692	0.0571427	1.50981	0.594363
PAK2 _ 453	13.4342	11.247	11.0473	0.00190002	1.20517	0.269236
DDR1 _ 802	8.83184	8.69384	5.70219	0.388743	1.22698	0.295115
SET _ 7	6.96408	8.83294	5.74481	0.852879	0.95544	-0.0657632
EMD _ 94	9.91796	9.77608	13.3551	0.454397	0.857542	-0.221721
AHCTF1 _ 1257	9.44198	9.15147	3.62072	0.384288	1.47852	0.564155
ANKRD39 _ 65	14.5242	10.9205	9.65373	0.0216243	1.41189	0.497624
OCLN _ 337	10.2335	10.0643	11.8921	0.500738	0.93216	-0.10135
TJP2 _ 1066	8.63247	8.9647	6.5413	0.543395	1.11344	0.155019
LAPTM4A _ 230	9.0611	11.3484	13.9604	0.110613	0.716043	-0.481882
IFNAR1 _ 527	2.20912	8.76263	5.26739	0.110705	0.314913	-1.66698
MAPK12 _ 185	2.98649	6.2427	7.25584	0.0176459	0.44249	-1.17628
PAK2 _ 139	10.5461	8.02149	7.15793	0.0206713	1.38953	0.474594
ERBB3 _ 1307	7.72074	8.48936	4.42664	0.597605	1.19553	0.257651
SH3PXD2B _ 230	8.97599	9.797	15.624	0.328432	0.706188	-0.501876
MYL12B _ 156	7.65811	6.94972	14.6347	0.500392	0.709596	-0.49493
ANO1 _ 981	10.2463	11.0352	8.86528	0.810559	1.02975	0.0422961
NUP188 _ 1523	10.0632	9.22602	6.18062	0.261314	1.30635	0.385542
EPB41L1 _ 864	5.47482	5.67437	12.6888	0.401366	0.596283	-0.74593
PCDH1 _ 1192	8.88242	9.79724	10.258	0.0381678	0.885795	-0.174955
SPRY3 _ 27	9.50998	11.7425	6.06378	0.850567	1.06816	0.0951301
KIRREL _ 663	7.42	8.69383	12.3477	0.231741	0.705272	-0.503747
PIK3R1 _ 470	14.2819	11.8189	7.22136	0.174118	1.50018	0.585133
EPB41L1 _ 796	3.71135	6.95296	26.0037	0.312111	0.225226	-2.15055
PPP1CB _ 306	7.71607	9.58919	10.9056	0.061448	0.752978	-0.409321
LSR _ 332	9.84765	12.6339	9.73093	0.454867	0.880637	-0.183381
ZDHHC5 _ 711	7.40966	6.9742	11.8475	0.497804	0.787352	-0.34492
WDR13 _ 128	6.18334	9.86945	25.5242	0.279133	0.349404	-1.51703
SND1 _ 109	9.86071	9.19946	7.59673	0.209526	1.17416	0.23163
ALDOA _ 414	8.45257	9.99139	8.15011	0.571094	0.93185	-0.101831
RCN2 _ 311	5.4125	5.55582	12.8373	0.407793	0.588536	-0.764799
NUP35 _ 300	7.22409	6.80989	15.7496	0.460002	0.640447	-0.642848
ANXA1 _ 39	12.0365	16.9466	7.68754	0.957191	0.977224	-0.0332388
MFSD6 _ 20	10.9993	12.0135	13.1704	0.110489	0.873521	-0.195086
WRNIP1 _ 500	8.82644	7.5625	12.7875	0.657121	0.867463	-0.205127
SPRED1 _ 294	8.64859	7.43885	6.88576	0.03292	1.20752	0.272042
PAK2 _ 130	9.87615	7.77429	7.74129	6.06685e-05	1.27306	0.348302
NRK _ 984	9.59097	7.5532	11.1636	0.909279	1.02485	0.0354141
AHCYL1 _ 28	6.9804	8.48292	15.3775	0.287544	0.585104	-0.773235
ZFP91 _ 85	9.05331	8.13613	4.66392	0.26603	1.41457	0.500367
KIAA1217 _ 393	6.77489	6.53364	9.22282	0.498129	0.859951	-0.217674
AGO3 _ 189	11.5986	9.06173	8.57875	0.00746984	1.315	0.395065
RCN2 _ 313	7.27576	8.75475	8.19338	0.050728	0.858591	-0.219956
SHB _ 10	8.22154	10.6017	10.4912	0.0005642	0.779553	-0.359281
SHB _ 272	7.06565	9.37497	14.4252	0.195647	0.593748	-0.752077
ZNF579 _ 483	9.44095	9.14922	6.68804	0.341606	1.19225	0.253682
PTPN1 _ 46	17.4766	13.5906	8.81138	0.119543	1.56028	0.6418
CEP55 _ 284	8.91032	11.3865	6.38444	0.992979	1.00279	0.0040264
PKP4 _ 415	5.60382	9.28961	12.8393	0.091391	0.506471	-0.981449
LMO7 _ 185	12.6924	9.43038	14.2639	0.759918	1.07135	0.0994284
TMEM55B _ 169	8.76295	13.4853	7.21115	0.663507	0.846805	-0.239899
PABPC1 _ 291	12.0683	11.4977	10.7112	0.133844	1.0868	0.120087
RABEP2 _ 133	13.9862	10.1727	13.9426	0.413841	1.15995	0.214057
LBR _ 166	8.1672	7.25568	9.31902	0.917925	0.985502	-0.0210699
CD2AP _ 361	8.3008	10.3241	9.44076	0.0699047	0.839953	-0.251619
GPRC5C _ 399	9.73136	8.30472	8.51423	0.00622188	1.15719	0.210626
PCDH1 _ 1158	8.72647	10.2441	14.2081	0.219489	0.713758	-0.486493
SPTBN2 _ 2289	14.5204	8.2417	8.68115	0.00131252	1.71607	0.779113
GPR126 _ 1172	7.89352	8.01976	23.5722	0.416452	0.499718	-1.00081
AP2B1 _ 328	14.4928	18.0648	14.0401	0.519405	0.902841	-0.147456
RAC1 _ 79	8.91255	9.38679	12.7928	0.329393	0.80367	-0.315325
CLCC1 _ 412	10.485	9.0296	8.64852	0.0131367	1.18621	0.246365
AMOTL1 _ 691	9.8845	6.95553	6.95099	6.00443e-07	1.42156	0.507478
FAM83B _ 896	6.56305	7.6548	13.6965	0.306472	0.61477	-0.701882
LCHN _ 213	9.46721	7.01684	15.3102	0.722131	0.848049	-0.23778
CPNE2 _ 411	9.75272	10.1094	9.78895	0.344927	0.980255	-0.0287709
CDV3 _ 95	5.37011	6.27133	20.9062	0.378081	0.395187	-1.33939
PLXNB2 _ 1621	13.3186	7.89347	9.57126	0.0318675	1.5252	0.608998
CDC42BPB _ 1638	6.35067	7.87886	6.54659	0.324914	0.880481	-0.183636
MFAP3 _ 357	7.05463	9.75262	5.30894	0.850175	0.936773	-0.0942288
EPPK1 _ 1331	10.6207	12.1535	6.0553	0.668269	1.16655	0.222244
CLINT1 _ 293	9.29547	12.9889	16.0826	0.0771832	0.63949	-0.645006
CAP1 _ 31	11.0739	9.15693	7.05365	0.105929	1.36625	0.450223
TNK2 _ 937	9.17623	8.31202	3.60048	0.305037	1.5406	0.623497
PCDH1 _ 1089	9.08841	7.95857	11.6201	0.738687	0.9284	-0.107181
PTPN9 _ 333	24.2418	12.6572	6.853	0.0378666	2.48504	1.31327
BROX _ 21	16.7916	12.4315	16.3636	0.347504	1.16628	0.221918
CCDC132 _ 571	9.90843	7.01602	14.3593	0.851592	0.92709	-0.109218
APP _ 762	7.29365	7.3362	4.20566	0.433258	1.26386	0.337836
PKP3 _ 195	5.11793	6.03214	14.2972	0.346423	0.503502	-0.989931
OTUB1 _ 68	13.3229	9.0452	6.63767	0.0449971	1.69904	0.764716
GTF2E2 _ 284	8.59052	8.75936	15.5286	0.403923	0.70739	-0.499421
ITGB1 _ 783	8.75336	7.08693	8.55643	0.332427	1.11911	0.162358
POLDIP3 _ 236	7.91577	8.98885	13.8999	0.287262	0.691673	-0.531837
ARHGEF5 _ 1140	5.89879	6.68203	15.4478	0.359753	0.533109	-0.907498
LRRC16A _ 1339	11.9268	8.44405	8.87601	0.00434246	1.37723	0.461767
EXOC4 _ 247	10.3633	9.54379	15.4605	0.544799	0.828919	-0.270698
THRAP3 _ 344	7.8487	8.3157	4.21425	0.520724	1.25279	0.325145
FLOT1 _ 223	7.8292	7.41207	11.8277	0.5025	0.813856	-0.297154
ATIC _ 208	8.05354	9.53354	7.74897	0.577803	0.931988	-0.101617
ZNF185 _ 652	5.81099	6.82088	5.32873	0.757434	0.956572	-0.0640538
AKAP2 _ 915	9.06733	6.52058	6.15085	0.00454882	1.43115	0.51717
CPNE3 _ 392	5.54563	6.76237	37.3913	0.393262	0.251197	-1.99311
PDLIM1 _ 321	8.37436	9.09364	12.497	0.290784	0.775741	-0.366353
BAIAP2 _ 505	6.76118	7.95048	11.0033	0.217179	0.71344	-0.487136
RAB11FIP5 _ 344	6.00706	9.32828	12.3137	0.0841851	0.555131	-0.849099
ERBB3 _ 1328	9.979	6.38247	5.82228	0.0051798	1.63526	0.709524
MYO6 _ 1182	7.90847	12.116	9.73306	0.127002	0.723919	-0.466101
MYL6 _ 89	8.27786	8.67054	7.3165	0.71531	1.03557	0.0504272
PIK3R2 _ 428	11.4308	10.8876	7.56111	0.315857	1.23919	0.309402
USP24 _ 2024	12.889	8.57142	7.46972	0.0125617	1.607	0.684366
FLNB _ 2533	6.52863	8.6207	12.0715	0.15742	0.631023	-0.664236
C6orf132 _ 1067	6.69998	7.45469	5.75448	0.920905	1.01444	0.0206877
DLG3 _ 808	13.2857	10.5011	7.9058	0.0879208	1.44356	0.529632
HNRNPR _ 438	7.89432	9.6188	9.28114	0.0115738	0.83538	-0.259495
DHX9 _ 132	8.16343	8.53005	8.91731	0.101573	0.935778	-0.0957613
RAPH1 _ 366	14.8486	11.4016	7.61182	0.106164	1.56191	0.643309
NRP1 _ 920	5.94275	9.6958	13.6297	0.100703	0.509549	-0.972707
OCLN _ 315	4.64419	5.68007	6.64066	0.0873944	0.753882	-0.40759
STXBP3 _ 521	5.87289	7.884	8.643	0.0242856	0.710702	-0.492684
ROCK2 _ 1318	7.41399	5.83003	7.33622	0.384904	1.12621	0.171478
ENSA _ 43	11.006	7.77923	9.80761	0.160886	1.25161	0.323789
CLINT1 _ 159	10.8125	14.0605	14.9984	0.0155471	0.744179	-0.426279
RAB10 _ 6	23.8155	11.7689	9.37869	0.00804754	2.25231	1.17141
EPS8L1 _ 526	22.235	13.3822	9.59379	0.0296898	1.93549	0.952701
CAV1 _ 14	7.49173	7.83721	13.6194	0.379327	0.698315	-0.51805
DDR1 _ 484	6.67922	8.69029	9.01414	0.00550706	0.754526	-0.406358
NXF1 _ 75	7.27156	9.39019	9.31361	0.000338599	0.777549	-0.362994
WDR70 _ 618	6.10348	10.8126	21.7576	0.203885	0.374789	-1.41585
RBCK1 _ 262	7.13257	7.71983	9.87565	0.262404	0.810728	-0.30271
EML4 _ 226	9.37863	11.3538	6.61288	0.882895	1.044	0.0621258
SLC7A11 _ 15	12.4469	12.1766	9.57567	0.350539	1.14443	0.194626
FUBP1 _ 58	6.88608	12.0222	12.7986	0.00490195	0.554862	-0.849799
MTMR6 _ 598	6.41523	7.28981	25.7815	0.387926	0.387963	-1.36601
FUS _ 468	4.428	13.0623	18.288	0.0499598	0.282485	-1.82376
AGFG1 _ 336	6.40558	8.85185	10.2445	0.0457516	0.67087	-0.575895
TOM1L2 _ 404	10.8804	6.54755	10.8804	0.422648	1.24862	0.320329
HNRNPA3 _ 358	6.95465	11.8348	4.16459	0.810797	0.869364	-0.201968
CDV3 _ 244	4.01369	7.40976	27.5154	0.312786	0.229845	-2.12127
TNK2 _ 938	9.71235	8.30164	4.29061	0.230603	1.54259	0.625357
TNS3 _ 780	10.3377	3.99498	12.9828	0.720672	1.21779	0.28427
SCAMP1 _ 73	5.809	7.85256	21.1187	0.320975	0.401018	-1.31826
HNRNPAB _ 270	10.2241	10.9853	11.1664	0.0111171	0.923097	-0.115446
SMAP _ 84	8.81438	7.89615	12.9624	0.589038	0.845158	-0.242707
TNS1 _ 1440	7.41688	5.33177	4.76552	0.0139929	1.46908	0.554916
PPFIBP2 _ 422	11.5277	6.94352	4.9155	0.0312774	1.94412	0.95912
ARHGAP32 _ 621	5.74728	8.71143	8.34596	0.00428848	0.673876	-0.569445
TNS1 _ 1326	8.72344	5.74767	8.98214	0.489306	1.18446	0.24423
EMD _ 105	9.72938	9.33862	10.852	0.676446	0.963754	-0.053263
USP9X _ 2556	8.27604	9.19945	8.35419	0.357764	0.942942	-0.0847584
TJP1 _ 1066	5.59788	7.65499	10.0796	0.114381	0.631295	-0.663614
SPRED2 _ 251	5.95511	6.4742	13.7201	0.37132	0.589781	-0.761749
MYH9 _ 193	9.04012	8.4997	7.28435	0.199434	1.14548	0.195946
RIN1 _ 681	7.11031	9.74273	7.20351	0.395414	0.83916	-0.252981
PKP4 _ 482	7.48379	8.61548	6.90989	0.7747	0.964073	-0.0527855
TLN1 _ 127	18.2451	10.1151	11.0282	0.00352182	1.72585	0.787305
EPB41L2 _ 88	5.72462	6.29697	15.446	0.377417	0.526572	-0.925296
STAT6 _ 641	11.4365	6.20522	8.41139	0.0645635	1.56486	0.646032
NUMA1 _ 169	11.239	12.3112	6.20017	0.582859	1.21428	0.280102
SPDEF _ 329	14.6065	12.5028	7.4085	0.209404	1.46716	0.553024
RAB1A _ 112	7.65679	8.43836	33.3322	0.399229	0.366611	-1.44768
OTUD4 _ 438	6.14957	8.12575	35.6989	0.3713	0.280644	-1.83318
SCAMP3 _ 53	7.98134	7.93614	20.306	0.425472	0.565208	-0.823147
TFRC _ 20	8.49091	10.4595	8.69869	0.341925	0.886401	-0.173968
ICA1 _ 262	10.5318	9.24001	10.6471	0.491075	1.05916	0.0829169
EPN2 _ 186	10.1318	9.48821	19.8986	0.473257	0.689547	-0.536279
NUDCD2 _ 145	8.85461	7.65023	18.1983	0.521028	0.685116	-0.545581
HGS _ 237	7.65806	9.01897	19.2759	0.3332	0.541304	-0.885489
EIF4B _ 211	7.05938	9.56222	10.0677	0.00830718	0.719247	-0.475441
RAI14 _ 222	10.2371	10.2339	9.95914	0.413734	1.01393	0.0199514
RIPK1 _ 384	6.09832	8.21693	15.3704	0.252314	0.517084	-0.951529
ZRANB2 _ 102	9.65962	11.4661	7.90644	0.989414	0.997249	-0.00397436
MARVELD2 _ 137	6.88343	8.73346	9.1033	0.00815656	0.771825	-0.373655
COPA _ 588	8.30247	9.27021	8.08464	0.591707	0.956789	-0.063727
RAVER1 _ 581	8.63847	9.5387	7.78115	0.982735	0.997522	-0.00357957
ZMIZ2 _ 103	4.17562	10.1876	14.5413	0.0639605	0.337711	-1.56614
SGMS2 _ 59	9.7003	9.90954	7.86751	0.509939	1.09133	0.126085
IQGAP1 _ 1117	14.5986	6.76144	4.92413	0.0108295	2.49857	1.3211
GAB2 _ 476	12.3136	9.09619	8.71272	0.00314831	1.38285	0.467647
SCAMP3 _ 85	8.53806	9.44633	14.9611	0.315081	0.699627	-0.515342
SH2B1 _ 55	8.02756	8.5288	7.14274	0.807954	1.02448	0.0348872
SDCBP _ 46	13.3602	10.7895	6.60887	0.155522	1.5358	0.618989
LASP1 _ 186	5.30195	10.0145	13.7776	0.0726565	0.44569	-1.16589
DDX17 _ 580	4.57344	14.3505	13.6831	0.0012461	0.326283	-1.6158
MAP4K3 _ 366	7.75782	8.32648	13.0666	0.340744	0.725266	-0.463418
MICALL1 _ 744	13.2732	9.33001	8.91177	0.00252671	1.45526	0.541275
GAB2 _ 614	8.01451	10.0642	13.3436	0.153351	0.684773	-0.546301
PTPRK _ 850	7.67422	9.14874	10.2043	0.0629809	0.793078	-0.334465
HGS _ 289	14.4045	13.2484	10.9851	0.180598	1.18881	0.249518
CSRP1 _ 71	9.40044	11.7394	10.6254	0.085384	0.840649	-0.250425
TRIP12 _ 859	7.29159	7.78264	6.86225	0.952642	0.995786	-0.00609212
ARVCF _ 182	10.8795	8.74577	9.28678	0.0204335	1.20665	0.271013
USP25 _ 69	10.8181	7.78113	6.35306	0.0343786	1.53077	0.614256
YIPF5 _ 42	10.3302	10.0001	7.49299	0.333803	1.18106	0.240083
SNW1 _ 459	6.75982	5.17775	13.6735	0.594388	0.717173	-0.479607
OCLN _ 420	16.1983	9.0928	5.15354	0.0440183	2.27402	1.18525
CSK _ 18	19.4794	19.1937	11.9544	0.393445	1.25076	0.322807
GAB2 _ 409	6.4579	7.93873	7.2783	0.0734088	0.848773	-0.23655
RAVER1 _ 585	10.0503	7.6681	9.80148	0.342769	1.1506	0.202387
USP24 _ 101	5.11898	4.17082	16.6886	0.485512	0.490807	-1.02677
LAMTOR1 _ 140	9.79261	8.54158	14.4756	0.62147	0.850894	-0.232949
STAT5A _ 694	14.5946	12.8257	11.4209	0.0721549	1.20384	0.267648
CTNND1 _ 334	6.87047	7.38024	11.7029	0.341971	0.720056	-0.473818
TNKS1BP1 _ 897	8.66273	7.89454	8.36068	0.14856	1.06584	0.0919899
FNBP1L _ 506	7.22087	8.66894	14.8233	0.279214	0.614744	-0.701941
UPF1 _ 1118	9.73916	9.44475	11.795	0.53174	0.917069	-0.124898
CRKL _ 105	12.327	10.5877	15.3282	0.815033	0.951311	-0.0720104
UNC93B1 _ 585	12.07	5.49399	6.18491	0.00306016	2.06697	1.04752
LUZP1 _ 799	11.499	8.7373	11.5666	0.441493	1.13269	0.179749
EPN1 _ 540	10.804	17.7821	11.3661	0.360869	0.741313	-0.431846
WDR13 _ 117	2.69579	4.69091	41.9222	0.383554	0.115667	-3.11196
NCK2 _ 99	4.90435	7.57029	10.6692	0.11272	0.537772	-0.894934
HNRNPA2B1 _ 262	9.37165	11.8698	7.88361	0.823622	0.948862	-0.0757292
ZFYVE9 _ 520	6.37884	7.91317	21.2628	0.343786	0.437266	-1.19342
PKP2 _ 166	3.20691	7.52096	18.7438	0.218954	0.244198	-2.03387
GAREM _ 596	6.3657	8.61978	13.5233	0.194932	0.57496	-0.798467
TMEM134 _ 57	10.0339	10.7513	10.6185	0.0102481	0.939078	-0.0906837
PLEC _ 4668	8.06474	11.2342	10.6281	0.0109958	0.737775	-0.438748
SPATA2 _ 433	6.09665	8.77611	11.5445	0.0990818	0.600047	-0.736853
KIF23 _ 949	9.98276	11.0838	11.6321	0.0375235	0.878922	-0.186193
HGS _ 524	9.98593	8.22545	18.8542	0.57252	0.737524	-0.439237
PIN1 _ 23	20.1523	13.8845	14.3233	0.00131326	1.42884	0.514848
YBX1 _ 208	9.70846	8.83711	9.72192	0.434532	1.04623	0.0651942
HNRNPL _ 92	8.16033	10.5996	6.77871	0.80791	0.939139	-0.0905901
CCDC50 _ 455	2.58176	7.56523	17.5049	0.18313	0.205964	-2.27954
WRNIP1 _ 111	10.119	12.753	23.4881	0.274522	0.558428	-0.840556
PLEC _ 4611	6.35567	8.66717	20.0379	0.294811	0.442826	-1.17519
RBM3 _ 155	6.95073	15.0528	12.9097	0.0224503	0.497146	-1.00826
GSK3A _ 279	7.87875	9.06391	5.07882	0.72456	1.11418	0.155979
PRKCD _ 313	7.88653	6.86714	6.6667	0.00791787	1.16545	0.220891
CDCP1 _ 707	6.54391	8.01505	8.48799	0.0186419	0.793056	-0.334506
EGFR _ 1197	6.45761	8.70324	13.3209	0.187281	0.58641	-0.770017
NUCKS1 _ 181	8.41689	9.53474	3.57336	0.595791	1.28423	0.3609
PTK2 _ 570	8.44779	9.4983	4.21103	0.607985	1.23242	0.301488
MPZL1 _ 263	4.03027	13.7864	7.36401	0.178407	0.381106	-1.39174
CD44 _ 706	5.62205	5.75109	3.96552	0.48242	1.1572	0.210644
CDK3 _ 19	8.64167	8.59932	3.92157	0.415743	1.38036	0.465044
MAPK14 _ 182	3.75142	7.25833	6.04915	0.0407596	0.563806	-0.82673
MGP _ 107	8.18169	9.59624	4.24828	0.68402	1.18194	0.241155
TLN1 _ 26	12.6428	8.86278	6.63882	0.0479802	1.63116	0.705897
PRKCD _ 334	4.73191	7.57572	11.6741	0.139589	0.491631	-1.02435
PTPRA _ 798	8.81447	7.36006	4.59279	0.176718	1.47487	0.56059
EEF1A1P5 _ 141	9.15402	8.7159	4.00124	0.35747	1.43964	0.525704
PGAM4 _ 92	7.09845	7.31259	3.2199	0.465081	1.34791	0.430729
SRRM1 _ 260	10.5286	8.10024	4.75991	0.133582	1.63739	0.7114
YES1 _ 426	3.29724	6.9404	10.8208	0.102517	0.371287	-1.4294
DNM1L _ 629	6.63288	10.238	8.82454	0.054627	0.69591	-0.523028
MAPK13 _ 182	4.61375	6.39209	4.60718	0.425495	0.83892	-0.253395
MPP5 _ 243	3.68064	6.93278	7.84292	0.0147358	0.498201	-1.0052
PIK3R1 _ 467	11.4057	9.56034	6.87683	0.140756	1.3878	0.472799
CD44 _ 697	7.54057	8.51511	7.01434	0.793333	0.971132	-0.0422612
SHB _ 268	6.8574	7.59947	10.4333	0.267046	0.760548	-0.394888
PTPN11 _ 62	8.72259	12.2385	4.6397	0.947318	1.03359	0.0476634
SRRM2 _ 2581	9.87231	7.94692	4.85826	0.153698	1.54192	0.624732
G6PD _ 447	9.44132	9.29056	4.49701	0.399189	1.36954	0.453692
AHNAK _ 836	6.1428	8.12267	11.0665	0.14366	0.640238	-0.643321
EGFR _ 1092	7.38292	8.63829	9.42332	0.0523238	0.817527	-0.290662
ATP1A1 _ 10	9.03661	9.9585	9.6319	0.0433481	0.922554	-0.116295
IRF2BP2 _ 360	10.1878	8.80824	4.57845	0.240279	1.52208	0.606043
PKP2 _ 631	7.81056	7.87844	9.18278	0.384623	0.915592	-0.127224
CDK3 _ 15	10.0281	8.43669	4.2285	0.221112	1.58357	0.663182
PDZK1IP1 _ 99	7.17664	7.91669	7.4598	0.154476	0.933456	-0.0993459
SRRM1 _ 616	9.46298	7.95637	4.61256	0.197649	1.50577	0.590504
RAP2C _ 166	9.60031	8.56029	4.97667	0.254792	1.41839	0.504249
CDCP1 _ 806	2.81702	1.53797	7.02315	0.64696	0.658095	-0.603632
LPHN2 _ 1421	7.44459	7.34008	9.42335	0.463245	0.888194	-0.171054
FRK _ 132	9.69019	7.80013	3.84926	0.189514	1.66364	0.734344
TYK2 _ 292	5.56942	7.96868	5.30496	0.506964	0.839169	-0.252966
ZFP36L1 _ 54	6.10535	7.6259	5.38062	0.756893	0.938814	-0.0910883
EGFR _ 1172	7.2655	9.80442	11.4348	0.0543025	0.68416	-0.547595
PKP3 _ 390	10.386	8.40172	4.17163	0.192184	1.65206	0.72427
DLG3 _ 673	15.2702	11.0942	7.52221	0.0792233	1.6405	0.714139
DYRK1A _ 321	9.65081	8.52124	5.63958	0.216362	1.36303	0.446817
VCL _ 692	8.50952	8.37185	5.20549	0.390606	1.25349	0.325948
CFL1 _ 140	20.9073	11.9469	8.24203	0.0281182	2.07117	1.05044
RPLP0P6 _ 24	9.97759	7.83907	5.76232	0.0922823	1.46714	0.553009
ANXA5 _ 94	8.23694	8.78823	5.01478	0.552434	1.1935	0.255197
PRPF4B _ 849	12.2698	9.7417	5.87344	0.147429	1.57153	0.652167
EPHA2 _ 772	5.94737	7.49953	10.9813	0.199093	0.643624	-0.63571
SLC4A1AP _ 82	7.26834	10.9753	6.22645	0.631152	0.845071	-0.242855
PVRL4 _ 502	6.00589	8.11163	10.7259	0.120699	0.637652	-0.649159
DLG1 _ 782	16.3465	8.4127	6.58425	0.0105083	2.17997	1.12431
CTNND1 _ 280	8.04787	7.29501	8.5344	0.849782	1.01682	0.0240703
OSBPL11 _ 189	7.16061	8.20483	9.49031	0.119662	0.809331	-0.305198
EPS15L1 _ 229	8.08537	11.0144	10.9823	3.04541e-05	0.735144	-0.443902
MAPK9 _ 185	11.8399	10.7913	7.6032	0.23921	1.28733	0.364385
VCL _ 822	8.67187	8.51931	4.98642	0.390815	1.28418	0.360843
MUC1 _ 1238	7.07608	9.09608	5.51267	0.910267	0.968746	-0.0458096
SGK223 _ 411	5.47963	6.55815	8.96262	0.198258	0.706103	-0.502049
SRRM1 _ 402	10.4855	7.99568	4.66047	0.130202	1.65697	0.728551
GSK3A _ 282	7.53901	9.08012	4.43565	0.768606	1.11559	0.157804
SEC31A _ 799	8.24069	8.27929	4.78297	0.431243	1.26176	0.335433
HDLBP _ 437	17.0095	10.245	8.34749	0.0147941	1.82972	0.871623
PKP3 _ 84	6.57644	7.01448	9.94231	0.323467	0.775671	-0.366483
PTPN11 _ 584	3.66257	8.58347	9.97981	0.0150896	0.394604	-1.34152
TNS1 _ 366	11.2975	7.21889	10.0952	0.207785	1.305	0.384048
PLCG1 _ 977	14.7455	10.6107	7.72843	0.0607722	1.6081	0.685355
MKI67 _ 2223	9.48538	15.3365	6.15374	0.809543	0.882762	-0.179903
PIK3R1 _ 452	15.6446	10.6951	7.30289	0.0593966	1.73848	0.797824
ANXA1 _ 21	9.31735	9.23479	11.8212	0.448018	0.885006	-0.17624
PVRL2 _ 454	6.49514	7.53784	8.57879	0.0952822	0.806017	-0.311118
DYRK2 _ 382	8.7395	8.7432	4.68526	0.423353	1.30164	0.380329
CTNND1 _ 904	6.12608	7.24637	11.9594	0.278082	0.637941	-0.648506
RHPN2 _ 639	8.52559	9.34502	5.54024	0.626587	1.14551	0.195987
SNRNP70 _ 126	9.83426	8.48921	5.95173	0.175559	1.362	0.445724
EEF1D _ 499	9.0354	9.24159	5.99217	0.474678	1.18623	0.246388
PLCG1 _ 783	7.74344	7.93873	11.287	0.3803	0.80553	-0.311989
FRK _ 46	9.86705	7.37179	3.90183	0.134977	1.75047	0.80774
CAPRIN1 _ 78	25.3288	12.9966	12.6394	0.000203698	1.97603	0.982607
RAPH1 _ 856	7.66645	15.7212	6.50658	0.53233	0.689807	-0.535734
ANXA1 _ 207	10.2002	7.86475	5.59057	0.0925766	1.51616	0.600418
MAPK1 _ 187	6.15971	8.34726	10.3394	0.085522	0.659262	-0.601077
SRRM2 _ 1003	10.0994	8.46616	4.76014	0.200645	1.52717	0.610861
MAPK11 _ 182	5.15922	8.03165	7.58254	0.00711536	0.660837	-0.597633
ARHGAP35 _ 1105	19.3122	9.52173	9.14122	0.000363177	2.06957	1.04933
CLDN4 _ 208	8.05007	8.71859	9.46732	0.108323	0.885309	-0.175748
STAT3 _ 704	11.5152	5.32732	8.641	0.111741	1.64876	0.721381
APLP2 _ 750	9.97935	8.90688	6.00928	0.223944	1.33806	0.420142
CD46 _ 387	8.44173	10.2762	11.548	0.0603269	0.773611	-0.37032
APP _ 757	8.1242	8.66944	5.11774	0.559982	1.17852	0.23697
EEF1A1P5 _ 29	8.55963	6.91115	6.69698	0.00370006	1.25802	0.331151
RETSAT _ 486	13.7432	11.8718	9.61834	0.11696	1.27903	0.35505
STMN1 _ 16	10.3563	8.53912	4.5486	0.196209	1.5826	0.662297
GAB1 _ 689	3.34914	13.0883	10.1652	0.0297889	0.288054	-1.79559
AHNAK _ 715	6.44944	8.16104	11.0975	0.162703	0.669773	-0.578255
TUBA1B _ 272	6.23182	8.4151	6.09643	0.470287	0.858878	-0.219475
EPB41L1 _ 343	7.01271	7.20336	9.70079	0.36821	0.829703	-0.269333
MKI67 _ 357	9.18201	8.50344	7.91939	0.0798341	1.1182	0.161179
TOM1 _ 386	8.48712	8.54808	8.96329	0.325043	0.969326	-0.0449461
G6PD _ 549	10.606	9.2913	8.18304	0.0777988	1.21389	0.279641
PAK4 _ 181	9.47611	9.36711	6.65806	0.392897	1.18265	0.242029
SRSF11 _ 207	9.16745	17.2595	9.26124	0.413728	0.691342	-0.532528
DDR1 _ 798	8.68079	8.90668	6.86579	0.517692	1.10075	0.13849
DDX17 _ 279	9.34025	7.47486	6.3402	0.0503168	1.35218	0.435292
TAGLN2 _ 192	6.72486	9.41046	8.56463	0.0332048	0.748242	-0.418423
GPRC5A _ 347	9.09057	9.86365	9.96837	0.00399976	0.916757	-0.125388
SLC25A5 _ 191	9.42902	8.5068	5.73039	0.237956	1.32456	0.405516
TUBA1B _ 357	8.53603	10.8122	5.94597	0.954441	1.01873	0.0267698
HSP90AA1 _ 406	10.4825	10.615	11.5559	0.328495	0.945608	-0.0806858
PKP4 _ 478	4.80887	6.94603	6.47288	0.0151426	0.71673	-0.480497
ARHGEF6 _ 188	10.5269	9.61449	7.27844	0.216844	1.2463	0.317656
VASP _ 39	10.9493	10.4707	6.03458	0.348098	1.32677	0.407914
LSR _ 551	6.99989	7.95212	10.5383	0.224631	0.757136	-0.401376
WWC1 _ 128	8.25399	8.3818	7.21936	0.516997	1.05813	0.0815106
ACTR3 _ 16	8.82981	9.76878	4.2575	0.577489	1.25904	0.332322
ENO3 _ 44	8.11865	8.4301	16.1517	0.392829	0.660541	-0.598279
MAPK3 _ 204	5.07125	9.00118	9.68306	0.00631233	0.542837	-0.881409
YES1 _ 446	9.15038	8.18507	5.92263	0.205012	1.29722	0.375421
SND1 _ 908	7.77233	10.2491	14.2496	0.154616	0.634509	-0.656288
HCFC1 _ 666	10.4592	9.59862	13.4156	0.638072	0.908936	-0.137749
CALM1 _ 100	13.6053	10.5678	6.02893	0.144313	1.63952	0.713271
CTNND1 _ 257	4.6875	7.43455	13.5038	0.197033	0.447744	-1.15925
ZC3HAV1 _ 77	21.2111	14.8422	9.24886	0.0818373	1.76091	0.816322
STAT3 _ 705	10.8025	5.04013	8.73699	0.168416	1.56819	0.649096
PIK3R3 _ 184	16.7844	12.4617	9.08142	0.070729	1.55821	0.639894
HNRNPA2B1 _ 259	7.08126	11.6794	6.58606	0.505053	0.77537	-0.367043
AHNAK _ 1469	5.85976	6.61817	10.7329	0.304568	0.675434	-0.566114
CTNND1 _ 208	5.73267	8.50372	8.80804	0.00269839	0.662286	-0.594474
TJP2 _ 1017	8.64635	7.76095	6.38624	0.149362	1.22234	0.289648
HMGA1 _ 44	10.2933	7.28439	5.58128	0.0453714	1.60012	0.678177
SHC1 _ 428	10.0166	9.63186	7.11208	0.321746	1.19644	0.258747
FAM129B _ 665	9.63176	10.6463	6.3975	0.653479	1.13023	0.176621
RAB7A _ 183	7.5996	6.80392	13.1671	0.531522	0.761063	-0.393912
PSMD9 _ 41	13.286	10.6098	7.58231	0.109505	1.46062	0.546585
FLNA _ 1308	16.4499	9.70367	9.21318	0.0012282	1.73918	0.798403
TAGLN2 _ 8	6.98038	11.397	15.0956	0.0771619	0.526969	-0.924211
PRDX6 _ 89	13.533	12.8354	9.43203	0.29397	1.21549	0.281544
CTNND1 _ 600	12.7409	8.23131	9.21103	0.0145281	1.46091	0.546872
LSR _ 406	6.43143	8.2538	12.0272	0.188223	0.634233	-0.656914
CD2AP _ 409	8.2681	10.1608	6.36578	0.998206	1.00058	0.00084035
AHNAK _ 121	8.03171	9.30322	7.43013	0.754819	0.959965	-0.0589465
UPF3B _ 117	20.2871	12.6719	8.61441	0.0415173	1.90612	0.930636
PIK3R2 _ 460	14.2204	9.6225	6.76354	0.0519064	1.73567	0.795497
PTPN3 _ 496	7.21312	6.72205	6.47038	0.0391785	1.09352	0.128985
OPHN1 _ 370	9.42086	8.24386	12.3429	0.711747	0.915235	-0.127786
HIPK1 _ 352	8.63652	8.5267	4.00697	0.404395	1.37813	0.462713
BCLAF1 _ 290	9.22963	8.17061	6.95312	0.111405	1.22055	0.28753
ANO1 _ 7	9.27458	10.6756	11.1911	0.0232994	0.848282	-0.237384
SF3B1 _ 426	9.0323	9.07653	7.87613	0.452078	1.06559	0.0916533
PVRL1 _ 468	7.73592	7.34253	5.71415	0.276271	1.18497	0.244856
LSR _ 586	8.15029	9.32245	12.4117	0.220673	0.749999	-0.415039
EGFR _ 991	8.89702	9.28219	10.2678	0.216764	0.910184	-0.13577
PHACTR4 _ 657	9.82732	9.58842	9.58932	3.57094e-06	1.02487	0.0354367
PIK3R2 _ 464	9.97606	8.41042	9.38485	0.157316	1.1212	0.165048
DBI _ 90	8.92297	8.48034	4.83336	0.339903	1.34042	0.422683
BAIAP2 _ 164	19.8966	9.35342	9.46418	2.78853e-05	2.11468	1.08044
PKP3 _ 176	8.70256	7.4113	7.86728	0.0430304	1.13918	0.188002
WASL _ 256	6.13011	7.00941	12.352	0.315142	0.633229	-0.659201
UBC _ 59	15.9577	15.3122	10.5624	0.331325	1.23346	0.302713
ITSN2 _ 553	25.0572	16.6243	12.5129	0.0363334	1.71994	0.782361
SLC4A2 _ 73	8.48165	9.13321	7.68517	0.929408	1.00862	0.0123783
DNAJB1 _ 176	14.9539	14.0726	8.74668	0.314659	1.31064	0.390269
KIRREL _ 621	5.95168	7.24461	11.4204	0.246818	0.637737	-0.648966
PLCG2 _ 759	9.02145	8.92205	9.71271	0.532182	0.968239	-0.0465645
KIF23 _ 582	16.9358	10.8278	7.90116	0.0353838	1.80851	0.854802
FLOT1 _ 238	7.64882	8.25359	11.1059	0.290446	0.790187	-0.339734
JAK2 _ 570	6.36184	9.67593	5.09112	0.699428	0.861627	-0.214865
SRSF9 _ 211	9.22072	9.13541	5.68768	0.404067	1.2441	0.315106
HNRNPU _ 271	8.67256	9.1068	7.67908	0.733076	1.03332	0.0472814
SLC25A5 _ 195	8.52911	8.93286	6.40263	0.566216	1.11234	0.153592
ARHGEF5 _ 1370	9.33778	8.769	5.83817	0.299505	1.27852	0.354474
PLEKHA6 _ 492	3.46419	5.96736	10.0883	0.15716	0.431523	-1.21249
PIK3R2 _ 467	12.1023	9.16077	9.35711	0.00118998	1.30709	0.386361
AHNAK _ 5836	7.34314	9.03374	11.1753	0.123189	0.726717	-0.460534
C11orf52 _ 78	7.23562	8.92857	9.87936	0.0448582	0.769423	-0.378152
EGFR _ 998	8.64999	7.11049	11.6311	0.780028	0.92308	-0.115473
SND1 _ 329	20.7797	14.5149	16.3598	0.0285436	1.34607	0.428752
TUBA1B _ 282	8.41347	13.4534	12.8106	0.00460835	0.640686	-0.642312
RBM17 _ 222	9.11321	8.93689	6.69715	0.366643	1.16582	0.221341
MELK _ 438	8.29274	6.97195	8.91452	0.753413	1.044	0.0621222
C11orf52 _ 103	3.7853	6.97121	6.18428	0.0192811	0.57547	-0.797186
EMD _ 49	8.25556	13.5552	6.92595	0.610059	0.806161	-0.310859
ERRFI1 _ 394	13.3799	9.00111	6.36234	0.0496544	1.74178	0.800563
TMEM192 _ 213	8.67907	8.78197	4.49179	0.441562	1.3077	0.387035
SH3PXD2B _ 226	19.5047	9.8748	9.63643	0.000149418	1.99933	0.999517
DSC2 _ 839	10.1558	9.09852	11.0126	0.926154	1.00997	0.014308
TRIM28 _ 541	14.3076	8.7548	25.8919	0.7585	0.825917	-0.275931
EPB41L4B _ 493	6.00962	6.13739	12.7189	0.407992	0.637413	-0.6497
PTPRK _ 917	12.4582	8.801	7.85741	0.0128059	1.49573	0.580846
SNTA1 _ 175	8.31608	4.97052	10.3255	0.826247	1.08735	0.120822
PTPLAD1 _ 316	10.5907	8.32155	5.03155	0.14037	1.58626	0.665626
CBLB _ 709	4.99632	9.81637	10.3583	0.00282039	0.495307	-1.0136
OCLN _ 443	21.2764	10.2681	5.1583	0.0336995	2.75844	1.46385
SRC _ 193	7.75405	7.56478	15.08	0.442531	0.684842	-0.546157
ACTB _ 198	17.9407	14.1131	13.581	0.00419754	1.29564	0.37366
GAB1 _ 406	9.60972	10.3131	8.6513	0.892101	1.01345	0.0192745
ITSN2 _ 968	4.95669	6.37475	12.2985	0.277293	0.530887	-0.913523
GNAI3 _ 61	19.4458	9.91321	7.88003	0.00915925	2.18575	1.12813
IQGAP1 _ 1114	13.259	8.77353	10.6646	0.0645156	1.36423	0.448086
ZNF185 _ 613	6.68972	6.40247	9.39311	0.503962	0.847036	-0.239504
ACLY _ 682	11.7391	9.74777	6.21609	0.167182	1.47071	0.556513
GAB2 _ 643	2.27291	8.21997	6.08283	0.0447792	0.317827	-1.65369
STAP2 _ 256	7.94318	7.43182	9.42017	0.675215	0.9427	-0.08513
S100A11 _ 32	18.0569	12.2984	13.1663	0.00657618	1.4182	0.504058
MLLT4 _ 1229	5.67337	7.22471	11.7981	0.235269	0.596482	-0.745449
ABI2 _ 213	5.62949	6.59186	9.49276	0.238115	0.699984	-0.514606
FUBP1 _ 60	7.27576	11.9452	12.2625	0.00107799	0.601113	-0.734293
EPN2 _ 17	17.685	15.0629	11.5504	0.130206	1.32903	0.410372
HNRNPA3 _ 145	22.7093	12.0231	8.99548	0.0150495	2.16088	1.11162
CAV1 _ 6	8.2103	8.64724	11.667	0.326259	0.808328	-0.306987
PIK3R2 _ 453	13.5644	9.51837	8.51512	0.0119492	1.50436	0.589151
SCRIB _ 1360	7.91702	9.14298	5.9993	0.846254	1.04568	0.0644466
CTTN _ 178	7.27226	9.12882	10.1368	0.0426872	0.754947	-0.405552
LNPEP _ 46	11.3386	11.4162	12.6251	0.376289	0.943257	-0.0842766
PKP4 _ 1168	3.61376	6.25371	11.6869	0.187397	0.402859	-1.31165
PLS3 _ 127	9.20396	8.67958	6.24975	0.288582	1.233	0.302177
SNAP29 _ 189	9.85392	10.158	8.60702	0.605125	1.05024	0.0707196
MARVELD2 _ 23	6.30526	8.00363	10.6254	0.148596	0.67693	-0.562922
IQGAP1 _ 1526	17.4948	11.9117	12.7747	0.00694278	1.41736	0.503206
PSMD9 _ 62	9.08081	10.9386	8.0686	0.796046	0.955513	-0.0656531
DSC2 _ 853	9.96816	8.32371	8.42799	0.00107046	1.19011	0.251091
AHNAK _ 964	6.17345	8.60305	11.1086	0.0988735	0.626376	-0.674899
SPRED1 _ 292	6.77847	8.16335	9.25701	0.0716321	0.778224	-0.361742
EFNB1 _ 317	8.13669	7.56586	4.58474	0.300836	1.33931	0.421486
SLC12A2 _ 275	17.9159	15.4769	12.0367	0.136803	1.30233	0.3811
SPTBN1 _ 2249	28.3392	12.1796	10.0451	0.00381621	2.55025	1.35064
RALGPS2 _ 278	11.3682	9.38027	8.66302	0.0225695	1.2601	0.333541
EPB41L2 _ 623	5.69107	5.94786	18.3158	0.406996	0.469101	-1.09203
42985 _ 319	7.7347	9.11887	7.06603	0.760702	0.955792	-0.0652317
PTPN11 _ 546	2.67582	13.6263	6.89507	0.152965	0.260784	-1.93907
CBLB _ 763	3.64243	7.67374	12.458	0.115208	0.361859	-1.4665
AHNAK _ 160	7.31785	9.12149	8.79937	0.00947831	0.816685	-0.292148
KIAA1217 _ 244	10.0655	9.95366	6.96158	0.394921	1.19012	0.251103
ERBB2IP _ 1104	5.03003	6.6249	10.579	0.212556	0.584754	-0.774099
ARHGEF2 _ 125	7.43638	10.0945	13.573	0.127252	0.628405	-0.670234
RAB35 _ 5	9.91257	7.1466	10.9376	0.691147	1.09627	0.132603
STAM2 _ 374	6.9699	11.2886	19.9514	0.183905	0.446217	-1.16418
PTRF _ 156	10.5742	9.39113	11.7885	0.990815	0.99853	-0.00212289
ITGB4 _ 1207	10.4872	9.56511	7.05346	0.225017	1.2621	0.335827
FRK _ 99	12.0585	10.3723	8.64142	0.0983564	1.2684	0.34301
PLCG1 _ 771	5.72677	5.77037	16.767	0.41961	0.508201	-0.976528
PKP4 _ 1115	7.34131	8.87982	8.74603	0.00205997	0.833016	-0.263584
42980 _ 52	7.87655	8.69622	10.9628	0.226983	0.801316	-0.319558
LSR _ 615	6.2275	7.54837	11.8014	0.246436	0.643678	-0.635589
EPN1 _ 128	19.7937	18.8485	13.0711	0.315675	1.24022	0.310599
ITGB4 _ 1474	8.07098	9.67617	10.064	0.011419	0.817721	-0.29032
HNRNPR _ 437	8.84645	8.24588	7.57215	0.108514	1.11853	0.1616
HNRNPA2B1 _ 336	6.84828	8.93737	8.89604	9.97858e-05	0.768029	-0.380768
PKP4 _ 372	9.21953	8.94081	6.70118	0.338062	1.17882	0.237342
GRB2 _ 209	9.58213	8.22662	8.15719	0.000623036	1.16971	0.226148
BAIAP2L1 _ 163	7.50085	8.56879	8.31818	0.0172161	0.888359	-0.170785
PPP1R14B _ 29	8.72355	11.3269	9.63071	0.174344	0.832496	-0.264484
ZDHHC18 _ 6	9.90028	8.55632	8.54708	1.17374e-05	1.1577	0.211258
PEAK1 _ 531	11.5908	7.26006	6.31196	0.0095944	1.70804	0.772342
TRIP10 _ 590	10.7803	10.2538	8.07982	0.275984	1.17602	0.233907
CSNK2B _ 209	10.6276	9.19761	5.28598	0.225566	1.46754	0.553396
PLCG1 _ 1254	6.27959	7.36226	13.44	0.307833	0.603741	-0.727999
ZDHHC5 _ 630	7.66981	8.43538	8.94187	0.0565924	0.882742	-0.179936
HBS1L _ 58	5.28937	8.17127	13.16	0.163909	0.495926	-1.0118
C6orf132 _ 1142	7.06637	9.07778	9.57979	0.0120861	0.757481	-0.400719
GAB2 _ 293	8.56505	7.99291	10.1398	0.686433	0.944708	-0.0820603
SPRY1 _ 89	8.11944	9.95596	8.7271	0.18501	0.869177	-0.202279
PLCG2 _ 1245	7.60971	9.43744	10.8411	0.069097	0.750517	-0.414043
CTNND1 _ 174	4.19346	6.91208	14.8786	0.234498	0.384885	-1.3775
C18orf8 _ 430	12.1253	10.4927	12.7204	0.687209	1.04469	0.0630803
HGS _ 216	21.8282	15.8331	7.63467	0.132831	1.86027	0.895514
ENSA _ 87	8.77936	8.76366	14.6461	0.424711	0.750062	-0.414919
CHN2 _ 158	7.73697	6.96912	9.69448	0.705064	0.928606	-0.106861
STX4 _ 251	13.3456	7.69322	7.69558	4.35972e-08	1.73446	0.794485
CXADR _ 318	9.1061	11.0062	10.0701	0.0922666	0.864107	-0.210718
VPS45 _ 318	19.6446	14.2828	15.3497	0.0119867	1.32589	0.406956
SH3PXD2B _ 855	11.9815	10.1893	8.70899	0.0758348	1.268	0.34255
GAREM _ 453	7.99616	11.3088	9.3125	0.146255	0.775525	-0.366755
MCFD2 _ 135	6.72957	8.83328	10.6788	0.0817296	0.689784	-0.535784
FRK _ 497	8.4891	10.4947	8.74566	0.325123	0.882426	-0.180453
SCAMP3 _ 35	7.7889	9.30137	14.7946	0.261131	0.646491	-0.629298
EVI5 _ 692	10.915	8.97889	7.33834	0.0782985	1.33785	0.419921
VANGL1 _ 312	18.9107	17.578	16.8428	0.0436989	1.0988	0.135925
TUBA1C _ 282	6.7746	13.2712	10.977	0.0430354	0.558771	-0.839671
EGFR _ 1138	8.27585	11.0116	16.8975	0.193427	0.593057	-0.753756
STX4 _ 115	8.94671	5.9665	6.57679	0.0127634	1.42653	0.512513
CTNND1 _ 241	4.67975	7.54339	12.4481	0.162477	0.468174	-1.09488
ARVCF _ 259	6.34653	8.64166	10.9664	0.0968746	0.64734	-0.627404
CBL _ 141	14.7073	16.0205	18.682	0.185308	0.847619	-0.238512
STAM2 _ 192	8.29181	10.4731	26.8182	0.332751	0.444705	-1.16908
TNS3 _ 855	7.44	5.63375	10.4155	0.829628	0.927148	-0.109128
CRK _ 136	17.8489	11.6142	9.15379	0.0261011	1.71888	0.781467
MYO6 _ 1146	6.08532	6.40426	12.6999	0.385581	0.637069	-0.650478
CASKIN2 _ 336	8.43027	6.30053	10.6564	0.98436	0.994318	-0.00822111
EPS15 _ 849	5.18221	7.40158	21.5634	0.319484	0.357826	-1.48267
