# Supplementary material for: Time-resolved phosphoproteomics reveals scaffolding and catalysis-responsive patterns of SHP2-dependent signaling
Source: eLife journal article supplement (doi:10.7554/elife.64251), 2021-03-23
Supplement: supp [file elife-64251-supp-v1.zip › elife_poa_e64251_Figure_2_source_data_2.xlsx]

## Sheet: Sheet1
Sample	CAPRIN1_pY78_normalized TMT signal
DMSO_EGF_0	4.56541
DMSO_EGF_5	3.29024
DMSO_EGF_10	4.12573
DMSO_EGF_30	13.0993
SHP099_EGF_0	5.04566
SHP099_EGF_5	5.92257
SHP099_EGF_10	10.3123
SHP099_EGF_30	29.448
WO_EGF_5	6.22731
WO_EGF_10	4.87431
WO_EGF_30	13.0892
