# Supplementary material for: Time-resolved phosphoproteomics reveals scaffolding and catalysis-responsive patterns of SHP2-dependent signaling
Source: eLife journal article supplement (doi:10.7554/elife.64251), 2021-03-23
Supplement: supp [file elife-64251-supp-v1.zip › elife_poa_e64251_Figure_2_source_data_3.xlsx]

## Sheet: Sheet1
Sample	ARHGEF5_pY1100_normalized TMT signal
DMSO_EGF_0	2.2737
DMSO_EGF_5	14.3455
DMSO_EGF_10	14.3071
DMSO_EGF_30	15.7394
SHP099_EGF_0	0.967158
SHP099_EGF_5	6.68115
SHP099_EGF_10	3.14789
SHP099_EGF_30	2.84779
WO_EGF_5	10.4464
WO_EGF_10	17.0481
WO_EGF_30	12.1957
