# Supplementary material for: Time-resolved phosphoproteomics reveals scaffolding and catalysis-responsive patterns of SHP2-dependent signaling
Source: eLife journal article supplement (doi:10.7554/elife.64251), 2021-03-23
Supplement: supp [file elife-64251-supp-v1.zip › elife_poa_e64251_Figure_3_figure_supplement_1_source_data_1.xlsx]

## Sheet: Sheet1
Sample	PLCG2_pY818_normalized TMT signal
DMSO_EGF_0	0.69897
DMSO_EGF_5	2.19291
DMSO_EGF_10	1.00964
DMSO_EGF_30	8.87719
SHP099_EGF_0	0.36568
SHP099_EGF_5	6.35813
SHP099_EGF_10	16.2436
SHP099_EGF_30	39.4151
WO_EGF_5	7.03162
WO_EGF_10	6.27537
WO_EGF_30	11.5318
