# Supplementary material for: Time-resolved phosphoproteomics reveals scaffolding and catalysis-responsive patterns of SHP2-dependent signaling
Source: eLife journal article supplement (doi:10.7554/elife.64251), 2021-03-23
Supplement: supp [file elife-64251-supp-v1.zip › elife_poa_e64251_Figure_3_figure_supplement_1_source_data_2.xlsx]

## Sheet: Sheet1
Sample	OCLN_pY443_normalized TMT signal
DMSO_EGF_0	3.03306
DMSO_EGF_5	2.22214
DMSO_EGF_10	3.97087
DMSO_EGF_30	11.0702
SHP099_EGF_0	3.65057
SHP099_EGF_5	7.48279
SHP099_EGF_10	17.0474
SHP099_EGF_30	22.6692
WO_EGF_5	11.8605
WO_EGF_10	12.1468
WO_EGF_30	4.84641
