# Supplementary material for: Time-resolved phosphoproteomics reveals scaffolding and catalysis-responsive patterns of SHP2-dependent signaling
Source: eLife journal article supplement (doi:10.7554/elife.64251), 2021-03-23
Supplement: supp [file elife-64251-supp-v1.zip › elife_poa_e64251_Figure_3_figure_supplement_1_source_data_3.xlsx]

## Sheet: Sheet1
Sample	GRB2_pY209_normalized TMT signal
DMSO_EGF_0	1.59349
DMSO_EGF_5	6.10029
DMSO_EGF_10	8.43724
DMSO_EGF_30	9.02943
SHP099_EGF_0	1.94878
SHP099_EGF_5	13.8801
SHP099_EGF_10	10.127
SHP099_EGF_30	7.40762
WO_EGF_5	17.3644
WO_EGF_10	12.4813
WO_EGF_30	11.6303
