# Supplementary material for: Time-resolved phosphoproteomics reveals scaffolding and catalysis-responsive patterns of SHP2-dependent signaling
Source: eLife journal article supplement (doi:10.7554/elife.64251), 2021-03-23
Supplement: supp [file elife-64251-supp-v1.zip › elife_poa_e64251_Figure_3_source_data_1.xlsx]

## Sheet: Sheet1
ARHGAP35_pY1105 data	Rep1	Rep2	Avg	STDEV	SEM
D0	8.25208	4.94176	6.59692	2.34075	1.65516
D5	5.63975	4.33152	4.98563	0.925062	0.654118
D10	9.2455	5.4548	7.35015	2.68043	1.89535
D30	8.39618	10.6473	9.52173	1.59176	1.12555
S9_0	6.28649	8.59442	7.44045	1.63195	1.15396
S9_5	10.2147	8.96746	9.59107	0.881927	0.623616
S9_10	13.5021	12.2606	12.8814	0.877881	0.620755
S9_30	17.1696	21.4547	19.3122	3.03003	2.14256
WO_5	7.08727	6.68228	6.88477	0.286373	0.202497
WO_10	4.64084	7.94813	6.29448	2.33861	1.65365
WO_30	9.56543	8.71701	9.14122	0.599925	0.424211
