# Supplementary material for: Time-resolved phosphoproteomics reveals scaffolding and catalysis-responsive patterns of SHP2-dependent signaling
Source: eLife journal article supplement (doi:10.7554/elife.64251), 2021-03-23
Supplement: supp [file elife-64251-supp-v1.zip › elife_poa_e64251_Figure_3_source_data_2.xlsx]

## Sheet: Sheet1
Phosphopeptide (mM)	ARHGAP35_pY1105_rep1	ARHGAP35_pY1105_rep2	OCLN_pY443_rep1	OCLN_pY443_rep2	PLCγ2_pY818_rep1	PLCγ2_pY818_rep2	GRB2_pY209_rep1	GRB2_pY209_rep2	CSF-1R_pY708_rep1	CSF-1R_pY708_rep2	TMEM134_pY57_rep1	TMEM134_pY57_rep2
0.5	20.0616	20.0393	10.9741	10.9652	8.93036	8.27143	7.46509	7.42071	1.26071	1.19777	3.73953	4.25426
0.357	18.7107	19.6732	11.0616	11.2241	7.31875	9.16696	7.19196	7.07143	1.19375	1.21339	3.66977	3.37054
0.255	17.4357	18.8598	10.8134	11.0375	6.60625	7.45268	6.00804	6.77143	1.30625	1.21964	2.81395	2.7969
0.182	17.383	18.2357	7.84732	7.74107	6.59732	6.67054	6.06696	5.69643	1.03214	1.05446	1.9938	1.84961
0.13	15.3554	16.8429	5.85179	6.04018	5.44643	5.75804	5.11429	5.42321	0.924737	0.989286	1.64651	1.73643
0.093	11.9321	14.4339	4.4375	4.46875	4.81518	4.14464	4.89375	4.45804	0.876786	0.883727	1.30698	1.83256
0.066	8.56339	12.1054	3.10982	2.98036	3.49911	3.15268	4.3375	4.09286	0.813726	0.796327	1.16279	1.37519
0.047	7.02143	9.47679	2.65446	2.66964	2.57143	2.74107	3.82143	3.97679	0.734821	0.78125	1.21395	1.08837
0.034	4.675	6.64018	1.99821	1.97946	1.96786	2.09821	3.39107	3.85357	0.850893	0.725893	1.0124	1.03411
0.024	3.62232	5.02232	1.34554	1.3625	1.57768	1.7125	3.24554	3.59643	0.648214	0.789286	1.0155	1.17829
0.017	2.6125	3.71429	1.31339	1.48125	1.3125	1.40357	2.69821	2.95982	0.629464	0.648214	0.947287	0.916279
0.012	2.05982	3.25446	1.04554	1.23661	1.39732	1.16071	2.57143	3.13214	0.69375	0.703571	1.31163	1.51318
0.00882	1.60804	2.64375	0.766964	0.924107	1.08929	1.12054	2.55179	2.59732	0.586432	0.634852	1.1907	0.933333
0.0063	1.37589	1.71696	0.661607	0.691964	0.766071	0.948214	2.12321	2.10893	0.542857	0.61875	0.965891	0.95814
0	0	0	0	0	0	0	0	0	0	0	0	0
