# Supplementary material for: Time-resolved phosphoproteomics reveals scaffolding and catalysis-responsive patterns of SHP2-dependent signaling
Source: eLife journal article supplement (doi:10.7554/elife.64251), 2021-03-23
Supplement: supp [file elife-64251-supp-v1.zip › elife_poa_e64251_Figure_4_source_data_1.xlsx]

## Sheet: Sheet1
Sample	GAB1_pY659_TMT RA_Rep1	GAB1_pY659_TMT RA_Rep2	Mean	Standard deviation	Standard error of the mean
DMSO_EGF_0	1.81265	3.30797	2.56031	1.05735	0.747658
DMSO_EGF_5	17.7413	14.0613	15.9013	2.60216	1.84
DMSO_EGF_10	17.3653	16.7573	17.0613	0.429896	0.303982
DMSO_EGF_30	13.1664	13.0102	13.0883	0.110487	0.0781258
SHP099_EGF_0	0.704501	2.51607	1.61028	1.28097	0.905783
SHP099_EGF_5	4.25379	5.67993	4.96686	1.00843	0.713071
SHP099_EGF_10	2.70666	5.30217	4.00441	1.83531	1.29776
SHP099_EGF_30	2.36203	4.33625	3.34914	1.39598	0.98711
WO_EGF_5	13.6493	13.8885	13.7689	0.169102	0.119573
WO_EGF_10	14.8836	12.1642	13.5239	1.9229	1.3597
WO_EGF_30	11.3544	8.9761	10.1652	1.6817	1.18914
