# Supplementary material for: Time-resolved phosphoproteomics reveals scaffolding and catalysis-responsive patterns of SHP2-dependent signaling
Source: eLife journal article supplement (doi:10.7554/elife.64251), 2021-03-23
Supplement: supp [file elife-64251-supp-v1.zip › elife_poa_e64251_Figure_4_source_data_2.xlsx]

## Sheet: Sheet1
Sample	GAB2_pY643_TMT RA_Rep1	GAB2_pY643_TMT RA_Rep2	Mean	Standard deviation	Standard error of the mean
DMSO_EGF_0	1.24687	1.14394	1.19541	0.0727799	0.0514632
DMSO_EGF_5	24.7794	21.4921	23.1358	2.32449	1.64366
DMSO_EGF_10	20.6755	19.3991	20.0373	0.902572	0.638215
DMSO_EGF_30	9.36667	7.07327	8.21997	1.62168	1.1467
SHP099_EGF_0	0.0793678	1.18599	0.63268	0.782501	0.553312
SHP099_EGF_5	4.47377	4.39541	4.43459	0.0554081	0.0391795
SHP099_EGF_10	2.6518	3.92617	3.28898	0.901115	0.637185
SHP099_EGF_30	2.16339	2.38243	2.27291	0.154885	0.109521
WO_EGF_5	15.7163	19.2679	17.4921	2.51133	1.77578
WO_EGF_10	12.7878	13.627	13.2074	0.59338	0.419583
WO_EGF_30	6.05899	6.10667	6.08283	0.0337192	0.0238431
