# Supplementary material for: Time-resolved phosphoproteomics reveals scaffolding and catalysis-responsive patterns of SHP2-dependent signaling
Source: eLife journal article supplement (doi:10.7554/elife.64251), 2021-03-23
Supplement: supp [file elife-64251-supp-v1.zip › elife_poa_e64251_Figure_5_figure_supplement_1_source_data_1.xlsx]

## Sheet: Sheet1
Sample_EGF (minutes)	Group	MPZL1_pY263_TMT RA_rep1	MPZL1_pY263_TMT RA_rep2	Mean	Standard Deviation (SD)	Mean-SD	Mean+SD
0	DMSO	16.2996	14.5977	15.4486	1.20343	14.2452	16.652
5	DMSO	16.1916	12.7679	14.4797	2.42088	12.0589	16.9006
10	DMSO	17.6274	12.0197	14.8236	3.96524	10.8583	18.7888
30	DMSO	16.5602	11.0125	13.7864	3.92286	9.8635	17.7092
0	SHP099	4.62311	6.64817	5.63564	1.43193	4.20371	7.06757
5	SHP099	4.5316	6.35283	5.44222	1.28781	4.15441	6.73002
10	SHP099	3.80318	5.51434	4.65876	1.20997	3.44879	5.86874
30	SHP099	3.06992	4.99061	4.03027	1.35813	2.67213	5.3884
