# Supplementary material for: Time-resolved phosphoproteomics reveals scaffolding and catalysis-responsive patterns of SHP2-dependent signaling
Source: eLife journal article supplement (doi:10.7554/elife.64251), 2021-03-23
Supplement: supp [file elife-64251-supp-v1.zip › elife_poa_e64251_Figure_5_figure_supplement_1_source_data_2.xlsx]

## Sheet: Sheet1
Sample_EGF (minutes)	Group	MPZL1_pY241_TMT RA_rep2
0	DMSO	12.8671
5	DMSO	10.3936
10	DMSO	9.13291
30	DMSO	12.1452
0	SHP099	6.32871
5	SHP099	5.2766
10	SHP099	5.10757
30	SHP099	5.03918
Note: MPZL1_pY263 site did not appear in replicate 1 of MS dataset
