# Supplementary material for: Time-resolved phosphoproteomics reveals scaffolding and catalysis-responsive patterns of SHP2-dependent signaling
Source: eLife journal article supplement (doi:10.7554/elife.64251), 2021-03-23
Supplement: supp [file elife-64251-supp-v1.zip › elife_poa_e64251_Figure_5_figure_supplement_1_source_data_3.xlsx]

## Sheet: Sheet1
FileName_raw_data	ImageNumber	Mean_Cells_Children_PLA_dots_Count	Median_Cells_Children_PLA_dots_Count	StDev_Cells_Children_PLA_dots_Count	Mean of Mean_Cells_Children_PLA_dots_Count	Mean of StDev
EGFR GAB1 D+E_1.czi	1	4.66102	3	4.17665
EGFR GAB1 D+E_2.czi	2	4.24561	4	3.40938
EGFR GAB1 D+E_3.czi	3	3.30303	2	3.41552	4.06989	0.695839
EGFR GAB1 D_1.czi	4	1.53191	1	1.60916
EGFR GAB1 D_2.czi	5	0.484375	0	0.809942
EGFR GAB1 D_3.czi	6	0.661972	0	1.22122	0.892754	0.560607
EGFR GAB1 S+E_rep2_1.czi	7	0.587302	0	0.902113
EGFR GAB1 S+E_rep2_2.czi	8	0.659341	0	0.951803
EGFR GAB1 S+E_rep2_3.czi	9	0.604651	0	1.31431	0.617098	0.0375978
EGFR GAB1 S_rep2_1.czi	10	0.866667	0	1.30979
EGFR GAB1 S_rep2_2.czi	11	0.928571	1	1.27975
EGFR GAB1 S_rep2_3.czi	12	0.880597	0	1.13981	0.891945	0.0324751
