# Supplementary material for: Time-resolved phosphoproteomics reveals scaffolding and catalysis-responsive patterns of SHP2-dependent signaling
Source: eLife journal article supplement (doi:10.7554/elife.64251), 2021-03-23
Supplement: supp [file elife-64251-supp-v1.zip › elife_poa_e64251_Figure_7_figure_supplement_1_source_data_1.xlsx]

## Sheet: pY sites_original TMT signal
gene_site	DMSO_0	DMSO_5	DMSO_10	DMSO_30	SHP099_0	SHP099_5	SHP099_10	SHP099_30	Washout_5	Washout_10	Washout_30
AHNAK _ 1469	1.71696	15.4277	11.2818	6.37709	2.07452	11.8163	9.06068	6.8121	14.832	13.2766	7.32415
AHNAK _ 5836	3.98431	13.8697	10.488	8.47239	3.67779	8.84912	8.87791	9.15465	11.9628	12.1626	8.50073
AHNAK _ 715	1.71681	17.2223	10.3802	8.05848	2.60952	9.57025	7.44138	6.75612	13.6786	13.1631	9.40339
AHNAK _ 836	2.9428	15.7686	9.7011	7.48385	3.20276	8.59286	7.02126	6.74794	14.4193	13.303	10.8165
AHNAK _ 964	1.75195	16.3027	10.7255	7.98081	2.10903	8.99259	7.1072	6.39814	14.8961	13.824	9.91204
ANXA1 _ 21	4.86825	11.154	9.68744	8.99643	5.54185	8.64967	7.29995	7.27107	14.3994	11.7075	10.4244
ANXA1 _ 39	3.56814	13.1692	11.9556	16.9466	4.91433	11.5488	6.76597	12.0365	5.14963	6.25783	7.68754
ARHGEF5 _ 1100	2.2737	14.3455	14.3071	15.7394	0.967158	6.68115	3.14789	2.84779	10.4464	17.0481	12.1957
ARHGEF5 _ 656	2.47103	22.7109	14.0819	11.6174	3.78192	11.3468	4.83402	4.50278	6.36894	8.29973	9.98456
C11orf52 _ 103	9.08809	16.3792	16.7906	5.21591	4.33762	10.4719	8.23908	3.53259	13.0398	9.47854	3.4268
C11orf52 _ 78	6.60141	11.8099	10.6245	8.97266	7.9293	9.06673	7.24295	7.53793	8.76329	9.3863	12.0651
C6orf132 _ 1067	13.916	8.42455	13.0611	7.45469	8.40356	8.64304	7.04857	6.69998	10.8967	9.69735	5.75448
C6orf132 _ 1142	6.3668	14.3	10.3029	9.43312	5.30732	8.43158	7.34456	6.13656	10.2681	11.2448	10.8642
CAV1 _ 14	4.14429	9.11327	9.5754	7.83721	3.56663	8.20319	7.78092	7.49173	14.1749	14.4931	13.6194
CAV1 _ 6	2.68901	10.8582	10.0045	7.24507	4.26545	7.3722	6.85795	7.78717	13.7202	14.3139	14.8863
CBLB _ 709	3.68475	13.6071	16.0173	12.5012	3.29976	8.71924	4.68715	3.73815	10.5812	11.9485	11.2155
CBLB _ 763	4.0839	15.6975	18.2152	9.15232	2.92526	7.93693	3.87871	3.11096	10.5799	13.3974	11.0219
CLINT1 _ 159	3.99564	6.65856	8.75265	14.0605	4.93319	7.33707	7.05013	10.8125	9.17914	12.2221	14.9984
CLINT1 _ 293	3.33953	6.8608	7.8043	12.9889	3.05227	4.05645	5.22396	9.29547	15.3123	15.9834	16.0826
CTNND1 _ 174	4.48194	17.9861	8.14508	6.83609	2.86896	6.6113	5.01581	3.97921	13.318	16.5941	14.1634
CTNND1 _ 193	7.50836	16.1124	9.50189	6.08838	6.67223	7.60612	6.00794	5.92573	12.4992	14.2297	7.84806
CTNND1 _ 241	5.49462	16.1501	9.46096	6.76011	4.07215	7.96794	5.8143	4.4045	13.7672	14.391	11.7171
CTNND1 _ 904	3.94391	16.831	9.12766	6.57261	3.0521	8.4097	6.44766	7.21901	12.1499	13.3406	12.906
EGFR _ 1069	1.95846	14.8682	12.9761	9.43643	3.05293	10.7111	5.78451	4.90377	12.53	13.5054	10.273
EGFR _ 1092	3.74278	16.0894	14.8109	7.68854	3.42305	10.3723	5.25542	5.44392	11.733	12.9269	8.51392
EGFR _ 1197	4.90886	12.1637	12.0688	9.19167	5.2869	7.94697	5.31632	5.68426	11.599	14.6583	11.1752
EPB41L1 _ 68	6.64416	15.6897	10.5126	7.21772	3.73278	9.64039	8.34804	7.02368	10.5114	10.8749	9.80466
EPB41L1 _ 864	5.63656	16.1732	9.39122	5.67437	4.30377	8.19052	6.50215	5.47482	11.776	14.1886	12.6888
EPB41L2 _ 623	6.61235	11.1618	5.98755	4.61017	3.48108	4.42135	4.29247	4.14206	20.3141	19.13	15.8471
EPB41L2 _ 88	1.60318	13.6023	8.9615	6.29697	1.6581	8.98065	6.27892	5.72462	14.3439	17.1039	15.446
ERBB2IP _ 1104	6.91913	12.5447	10.4173	7.2621	7.58304	9.67316	7.55354	4.42776	10.7067	13.5054	9.40721
ERBB2IP _ 1164	6.7595	15.0894	9.51973	8.30004	6.89145	8.23069	8.05436	6.23078	9.47287	11.1055	10.3456
FLOT1 _ 223	6.34361	10.6291	9.57194	7.41207	7.51898	7.49069	8.82729	7.8292	10.7808	11.7687	11.8277
FLOT1 _ 238	5.84005	10.6209	9.0656	7.41266	5.64255	6.75032	6.57447	6.68762	11.4649	15.6169	14.3241
FUBP1 _ 58	5.26122	13.3867	9.11311	12.0222	6.2024	10.9281	6.04733	6.88608	6.31682	11.0375	12.7986
FUBP1 _ 60	6.82571	10.7272	9.72426	10.4266	5.33278	8.91883	6.03434	4.70324	11.1746	11.8982	14.2343
GAB1 _ 689	1.81265	17.7413	17.3653	13.1664	0.704501	4.25379	2.70666	2.36203	13.6493	14.8836	11.3544
GAB2 _ 643	1.24687	24.7794	20.6755	9.36667	0.0793678	4.47377	2.6518	2.16339	15.7163	12.7878	6.05899
LPHN2 _ 1421	5.29462	12.7713	9.87358	6.88467	5.30773	9.53992	8.1724	7.94694	13.4865	11.4251	9.29724
LPHN2 _ 1448	5.15595	12.637	7.90269	8.92274	5.379	7.97922	5.93257	7.07517	13.2073	13.7503	12.0581
LSR _ 406	6.41145	11.4971	10.3785	9.27868	5.19461	10.6571	7.1901	7.2147	10.4538	11.915	9.80898
LSR _ 535	5.67119	8.4262	11.8161	10.4127	6.14062	10.7682	6.49269	7.24533	10.2079	14.3734	8.44575
MARVELD2 _ 137	9.82482	17.9504	9.57208	8.73346	6.4943	8.70994	5.10011	6.88343	8.07058	9.55755	9.1033
MARVELD2 _ 23	4.56231	14.2495	10.6723	7.68831	3.67444	7.73704	7.00665	6.07255	12.9035	13.1208	12.3127
MLLT4 _ 1229	6.39844	13.7851	7.90024	5.94835	5.70438	7.78929	6.18055	4.91314	14.245	13.8961	13.2393
MLLT4 _ 1496	4.66298	13.1396	6.9053	4.75749	3.8872	5.34336	5.0428	4.19634	18.9867	18.5845	14.4938
MPZL1 _ 241	12.8671	10.3936	9.13291	12.1452	6.32871	5.2766	5.10757	5.03918	8.60145	11.1815	13.9261
MPZL1 _ 263	14.5977	12.7679	12.0197	11.0125	6.64817	6.35283	5.51434	4.99061	8.37182	8.49787	9.22656
OCLN _ 315	11.9874	15.1984	8.57782	5.68007	6.54212	11.3425	8.48326	4.64419	11.1423	9.76125	6.64066
OCLN _ 368	4.8717	11.0858	6.92491	9.42227	4.73739	7.21871	7.28595	10.0072	11.9504	14.3272	12.1685
PAG1 _ 341	25.8117	10.5192	5.95499	7.68909	12.247	5.79621	4.3438	3.72994	6.76873	7.94245	9.19695
PAG1 _ 359	27.7352	8.836	4.07807	8.57093	15.4517	3.60654	2.62475	3.11186	6.60615	8.03952	11.3393
PKP4 _ 1156	8.68041	14.3058	6.73846	6.86875	3.24176	5.68548	4.39359	3.22428	16.0323	17.7039	13.1252
PKP4 _ 1168	6.15609	10.6447	11.0734	6.84714	4.93023	7.5246	6.95451	4.7801	13.3865	16.5685	11.1343
PLCG1 _ 1254	2.49391	16.7629	10.0301	6.68952	1.77325	6.96379	5.20098	5.88675	10.8713	21.4932	11.8343
PLCG1 _ 771	3.81345	15.7421	10.5491	5.83252	3.83079	6.40762	6.08458	6.45601	10.7873	18.8387	11.6578
PTPN11 _ 546	4.65426	17.577	16.1221	11.5678	2.32237	3.65191	4.21295	3.67397	15.2719	13.2002	7.74561
PTPN11 _ 584	4.87578	15.7154	14.3604	9.79011	3.34062	5.28928	4.92423	3.23123	16.9297	12.2442	9.29901
PXN _ 118	26.0833	6.45851	5.36449	4.63284	13.2393	3.76819	4.47184	3.78919	13.4067	10.3389	8.44674
PXN _ 88	19.8075	6.74764	4.29274	5.41643	11.8208	4.01084	4.57348	3.73595	12.1444	12.3057	15.1445

## Sheet: pY sites_scaled TMT signal
pY	DMSO_0	DMSO_5	DMSO_10	DMSO_30	SHP099_0	SHP099_5	SHP099_10	SHP099_30	Washout_5	Washout_10	Washout_30
AHNAK _ 1469	0.111291	1	0.760643	0.429955	0.139868	0.79668	0.610888	0.459285	1	1	1
AHNAK _ 5836	0.287267	1	0.862311	0.696592	0.302385	0.727567	0.729934	0.752688	0.983573	1	1
AHNAK _ 715	0.0996858	1	0.758863	0.589133	0.190775	0.699654	0.544018	0.49392	1	1	1
AHNAK _ 836	0.186624	1	0.672785	0.519015	0.222116	0.595926	0.486934	0.467979	1	1	1
AHNAK _ 964	0.107464	1	0.720017	0.535765	0.141583	0.603688	0.477118	0.429518	1	1	1
ANXA1 _ 21	0.338086	0.774612	0.672764	0.624776	0.384865	0.600695	0.506961	0.504954	1	1	1
ANXA1 _ 39	0.210553	0.7771	0.705486	1	0.408285	0.959479	0.56212	1	0.669867	0.814023	1
ARHGEF5 _ 1100	0.13337	0.84147	0.839218	0.923236	0.056731	0.391899	0.184647	0.167044	0.61276	1	1
ARHGEF5 _ 656	0.108804	1	1	1	0.333302	1	0.48415	0.450974	0.637879	0.831256	1
C11orf52 _ 103	0.541261	0.975496	1	0.4	0.332646	0.803072	0.631843	0.27091	1	1	1
C11orf52 _ 78	0.547151	0.978849	0.880602	0.74369	0.657212	0.751486	0.600324	0.624773	0.726337	0.777974	1
C6orf132 _ 1067	1	0.645011	1	0.684125	0.771203	0.793181	0.646855	0.614864	1	1	1
C6orf132 _ 1142	0.445229	1	0.916243	0.838889	0.471981	0.749822	0.653154	0.545725	0.913142	1	1
CAV1 _ 14	0.28595	0.628802	0.660689	0.540756	0.246092	0.566008	0.536872	0.516918	0.978048	1	1
CAV1 _ 6	0.180637	0.729413	0.672061	0.486695	0.286536	0.495234	0.460689	0.523111	0.92167	0.961552	1
CBLB _ 709	0.230047	0.849524	1	1	0.276165	0.729733	0.392278	0.312854	0.885566	1	1
CBLB _ 763	0.224203	0.861781	1	0.683141	0.218345	0.592422	0.289512	0.232206	0.789699	1	1
CLINT1 _ 159	0.266404	0.443951	0.583572	0.937467	0.328914	0.48919	0.470058	0.720911	0.612007	0.814895	1
CLINT1 _ 293	0.207648	0.426597	0.485263	0.807634	0.189787	0.252226	0.32482	0.577982	0.952105	0.993828	1
CTNND1 _ 174	0.24919	1	0.490842	0.411959	0.17289	0.398413	0.302265	0.239796	0.802572	1	1
CTNND1 _ 193	0.465999	1	0.667751	0.427864	0.468895	0.534525	0.422211	0.416434	0.87839	1	1
CTNND1 _ 241	0.340223	1	0.65742	0.469745	0.282964	0.553674	0.404023	0.306059	0.956654	1	1
CTNND1 _ 904	0.234325	1	0.684204	0.492679	0.228784	0.630386	0.483313	0.541133	0.910746	1	1
EGFR _ 1069	0.131721	1	0.960806	0.698714	0.226052	0.793098	0.42831	0.363096	0.927777	1	1
EGFR _ 1092	0.232624	1	1	0.594773	0.264802	0.802381	0.40655	0.421132	0.907644	1	1
EGFR _ 1197	0.334886	0.829818	0.823341	0.627062	0.360676	0.542148	0.362683	0.387784	0.791291	1	1
EPB41L1 _ 68	0.423473	1	0.966681	0.663704	0.343247	0.88648	0.767643	0.645861	0.966575	1	1
EPB41L1 _ 864	0.348512	1	0.661885	0.399924	0.303326	0.57726	0.458266	0.385861	0.829959	1	1
EPB41L2 _ 623	0.325506	0.54946	0.294749	0.226945	0.171363	0.217649	0.211305	0.203901	1	1	1
EPB41L2 _ 88	0.093732	0.795272	0.523944	0.36816	0.0969429	0.525064	0.367104	0.334697	0.83863	1	1
ERBB2IP _ 1104	0.512324	0.928871	0.771343	0.53772	0.561483	0.716246	0.559299	0.327852	0.792773	1	1
ERBB2IP _ 1164	0.447962	1	0.857209	0.747381	0.620544	0.741137	0.725259	0.561053	0.852989	1	1
FLOT1 _ 223	0.536336	0.898659	0.809283	0.626671	0.63571	0.633318	0.746325	0.661938	0.911485	0.995016	1
FLOT1 _ 238	0.373958	0.68009	0.5805	0.474657	0.361311	0.432245	0.420985	0.42823	0.734136	1	1
FUBP1 _ 58	0.39302	1	0.712037	0.939336	0.484614	0.853847	0.472498	0.538032	0.493554	0.862393	1
FUBP1 _ 60	0.479524	0.753615	0.683155	0.732494	0.374642	0.626572	0.423928	0.330415	0.785043	0.835877	1
GAB1 _ 689	0.102171	1	1	0.884624	0.0473339	0.285803	0.181854	0.1587	0.917069	1	1
GAB2 _ 643	0.0503187	1	1	0.595984	0.00505002	0.284658	0.168729	0.137652	1	1	1
LPHN2 _ 1421	0.392586	0.946966	0.732106	0.510484	0.393558	0.707366	0.605968	0.58925	1	1	1
LPHN2 _ 1448	0.37497	0.91903	0.574727	0.648911	0.391191	0.580293	0.43145	0.514546	0.960505	1	1
LSR _ 406	0.5381	0.964928	0.871045	0.778741	0.435973	0.894432	0.603451	0.605516	0.877368	1	1
LSR _ 535	0.394562	0.586237	0.822085	0.724441	0.427222	0.749176	0.451717	0.50408	0.710192	1	1
MARVELD2 _ 137	0.54733	1	1	0.913776	0.679494	0.911315	0.533621	0.720208	0.844419	1	1
MARVELD2 _ 23	0.320174	1	0.813392	0.585965	0.280047	0.589679	0.534013	0.46282	0.983439	1	1
MLLT4 _ 1229	0.44917	0.967715	0.554596	0.417574	0.400447	0.546807	0.433874	0.344902	1	1	1
MLLT4 _ 1496	0.245592	0.692042	0.363691	0.25057	0.204733	0.281426	0.265597	0.221014	1	1	1
MPZL1 _ 241	0.923956	0.746344	0.655813	0.872121	0.45445	0.378901	0.366763	0.361852	0.617651	0.802921	1
MPZL1 _ 263	1	1	1	1	0.720547	0.688537	0.597659	0.540896	0.90736	0.921022	1
OCLN _ 315	0.788731	1	0.756254	0.500777	0.576778	1	0.761354	0.416806	1	1	1
OCLN _ 368	0.340032	0.773761	0.48334	0.657649	0.330657	0.503847	0.50854	0.698474	0.834106	1	1
PAG1 _ 341	1	0.858915	0.48624	0.627834	1	0.630232	0.472309	0.405562	0.735976	0.863597	1
PAG1 _ 359	1	0.571846	0.263923	0.554691	1	0.318058	0.231475	0.274432	0.582591	0.708998	1
PKP4 _ 1156	0.490309	0.808058	0.380619	0.387979	0.183109	0.321142	0.24817	0.182122	0.905575	1	1
PKP4 _ 1168	0.371554	0.64247	0.668339	0.413263	0.297567	0.454151	0.419743	0.288506	0.807949	1	1
PLCG1 _ 1254	0.116033	0.779915	0.466664	0.311239	0.082503	0.324	0.241983	0.273889	0.505802	1	1
PLCG1 _ 771	0.202426	0.835623	0.559966	0.309603	0.203346	0.34013	0.322983	0.342699	0.572616	1	1
PTPN11 _ 546	0.264792	1	1	0.757454	0.152069	0.239126	0.275863	0.240571	1	1	1
PTPN11 _ 584	0.288001	0.928275	0.848234	0.57828	0.197323	0.312426	0.290863	0.190861	1	1	1
PXN _ 118	1	0.481739	0.400136	0.345562	0.98752	0.281069	0.333554	0.282635	1	1	1
PXN _ 88	1	0.445552	0.283453	0.357651	0.780537	0.264839	0.30199	0.246688	0.801904	0.812557	1
