# Supplementary material for: Time-resolved phosphoproteomics reveals scaffolding and catalysis-responsive patterns of SHP2-dependent signaling
Source: eLife journal article supplement (doi:10.7554/elife.64251), 2021-03-23
Supplement: supp [file elife-64251-supp-v1.zip › elife_poa_e64251_Supplementary_file_1.xlsx]

## Sheet: Sample Description
Sample name	TMT channel	Time (min)	Description
126 (-0')	126	0	--	- drug (2hr)
127n (-5')	129n	5	Egf
127c (-10')	127n	10
128n (-30')	129c	30
128c (+0')	127c	0	--	+ drug (2hr)
129n (+5')	130n	5	Egf
129c (+10')	128n	10
130n (+30')	130c	30
130c (WO+5')	128c	5	Egf	Egf (10min); post washout Egf (5 to 30min)
131n (WO+10')	131n	10
131c (WO+30')	131c	30

## Sheet: Summary metrics
Overall MS results
Protein FDR 2.0%
pY Proteins	Total pY peptides	Unique pY peptides	Total # Sites Localized and quantified (single sites only)
421	1214	773	653
Localization score >13
Site data was based on sum SN >200 and isolation specificty of 0.5
Peptide/Protein #s are based sum SN >100
These metrics are more on the conservative end

## Sheet: Key
site ID	indication if values are from single phoprhoylation sites or multiple phosporylation sites (composite) on the same peptide
Protein Id	Uniprot ID and accession number
gene_symbol	gene symbol
prot_description	protein name and short description
Site Position	amino acid site in which phosphorylation is located
Motif	phosphosite flanked by six amino acids
Max Score	Ascore/ModScore score for site localization in motif
redundancy	is this site seen in more than one peptide, (redundant, R) or is it unique (u)
sequence	phosphopeptide sequence
spectral_counts	Number of spepctral count for this phosphopeptide
num_quant	Number of quantified phosphopeptides
Datapoints	total sum signal-to-noise of reporter ions for each sample
Yellow Datapoints	normalized sum signal-to-noise of reporter ions for each sample
Green Datapoints	Scaled normalized sum signal-to-noise of reporter ions for each sample

## Sheet: SiteQuant
										Sum SN per channel	39768.8	50261	47966.8	56409.2	36626.1	47291.7	58304.9	62846.7	65675.4	80613.3	87547.1	633311	Normalized											Normalized Sum	Normalized and Scaled per Site
Site_id	Protein Id	gene_symbol	prot_description	Site Position	Motif	Max Score	Redundancy	Sequence	Spectral_counts	Num_quant	126	127n	127c	128n	128c	129n	129c	130n	130c	131n	131c	Sum across all 11 channels	126	127n	127c	128n	128c	129n	129c	130n	130c	131n	131c		126	127n	127c	128n	128c	129n	129c	130n	130c	131n	131c
1170	sp|P49840|GSK3A_HUMAN	GSK3A	GSK3A_HUMAN Glycogen synthase kinase-3 alpha	279	GEPNVSYICSRYY	30.8348	R	R.GEPNVSY#ICSR.Y	9	9	1347.85	1003.87	1002.57	1085.04	1348.18	999.738	1227.48	1049.92	737.687	695.703	928.22	11426.3	2967.16	1748.59	1829.86	1683.98	3222.55	1850.73	1843.1	1462.57	983.356	755.542	928.22	19275.7	15.3933	9.0715	9.4931	8.73632	16.7182	9.60137	9.56181	7.58766	5.10154	3.91967	4.8155
416	sp|Q05655|KPCD_HUMAN	PRKCD	KPCD_HUMAN Protein kinase C delta type	313	SEPVGIYQGFEKK	154.095	R	R.RSDSASSEPVGIY#QGFEK.K	12	7	1236.65	674.598	574.275	533.742	1073.24	726.796	797.483	868.994	545.905	523.771	913.948	8469.4	2506.75	1081.98	965.13	762.761	2362.18	1238.89	1102.61	1114.66	670.071	523.771	841.564	13170.4	19.0332	8.21529	7.32804	5.79149	17.9355	9.40668	8.37192	8.46337	5.08772	3.97689	6.38983
510	sp|Q9H5V8|CDCP1_HUMAN	CDCP1	CDCP1_HUMAN CUB domain-containing protein 1	707	GPAVGIYNDNINT	138.848	R	K.GPAVGIY#NDNINTEM*PR.Q	13	11	931.257	468.201	426.633	539.536	786.619	414.223	510.639	543.517	467.693	468.67	885.465	6442.45	1887.7	750.946	717.003	771.041	1731.33	706.084	706.018	697.169	574.071	468.67	815.336	9825.37	19.2125	7.64292	7.29746	7.84745	17.621	7.18633	7.18566	7.09559	5.84274	4.77	8.29827
353	sp|P00533|EGFR_HUMAN	EGFR	EGFR_HUMAN Epidermal growth factor receptor	1197	TAENAEYLRVAPQ	154.095	R	K.GSTAENAEY#LR.V	25	23	733.094	2295.8	2173.9	1947.06	727.156	1411.31	1164	1341.51	2860.61	4437.38	3673.93	22765.8	1486.02	3682.22	3653.48	2782.51	1600.46	2405.72	1609.36	1720.75	3511.26	4437.38	3382.96	30272.1	4.90886	12.1637	12.0688	9.19167	5.2869	7.94697	5.31632	5.68426	11.599	14.6583	11.1752
2339	sp|Q9H1E3|NUCKS_HUMAN	NUCKS1	NUCKS_HUMAN Nuclear ubiquitous casein and cyclin-dependent kinase substrate 1	181	KATVTPSPVKGKG	30.8348	R	K.ATVTPS#PVK.G	1	1	546.603	392.712	317.062	359.443	471.314	305.301	407.624	398.658	202.222	123.87	178.072	3702.88	1107.99	629.869	532.856	513.674	1037.35	520.415	563.588	511.358	248.218	123.87	163.969	5953.16	18.6118	10.5804	8.95081	8.62859	17.4253	8.74183	9.46703	8.5897	4.16952	2.08074	2.75431
2057	sp|Q05397-5|FAK1_HUMAN	PTK2	FAK1_HUMAN Isoform 5 of Focal adhesion kinase 1	570	DFGLSRYMEDSTY	81.6917	R	R.Y#MEDSTYYK.A	2	2	461.009	332.032	330.613	332.211	412.119	313.283	395.433	353.582	233.396	195.433	251.127	3610.24	934.488	532.545	555.631	474.757	907.067	534.022	546.732	453.539	286.482	195.433	231.238	5651.93	16.534	9.42235	9.83081	8.39991	16.0488	9.44848	9.67336	8.02449	5.06875	3.45781	4.0913
1973	sp|O95297|MPZL1_HUMAN	MPZL1	MPZL1_HUMAN Myelin protein zero-like protein 1	263	KSESVVYADIRKN	53.5337	R	K.SESVVY#ADIRK.N	3	3	437.179	548.858	570.257	630.024	114.2	144.536	149.552	130.122	237.466	349.632	324.833	3636.66	886.183	880.311	958.377	900.356	251.352	246.376	206.773	166.907	291.477	349.632	299.106	5436.85	16.2996	16.1916	17.6274	16.5602	4.62311	4.5316	3.80318	3.06992	5.36114	6.43078	5.50145
2683	sp|P16070|CD44_HUMAN	CD44	CD44_HUMAN CD44 antigen	706	NGEASKSQEMVHL	1000	R	K.S#QEM*VHLVNK.E	2	2	424.047	270.237	224.045	168.225	345.898	257.773	274.522	170.221	174.625	179.675	199.64	2688.91	859.564	433.432	376.531	240.408	761.315	439.399	379.558	218.343	214.344	179.675	183.829	4286.4	20.0533	10.1118	8.78432	5.60862	17.7612	10.251	8.85495	5.09385	5.00057	4.19175	4.28865
1913	sp|Q00526|CDK3_HUMAN	CDK3	CDK3_HUMAN Cyclin-dependent kinase 3	19	GTYGVVYKAKNRE	150.768	R	K.IGEGTYGVVY#K.A	2	2	411.917	300.561	295.887	280.854	386.43	289.453	338.702	291.757	156.756	168.865	205.229	3126.41	834.976	482.068	497.27	401.364	850.525	493.401	468.294	374.236	192.411	168.865	188.975	4952.38	16.8601	9.73406	10.041	8.10445	17.1741	9.96289	9.45594	7.55667	3.88521	3.40978	3.81584
753	sp|Q16539|MK14_HUMAN	MAPK14	MK14_HUMAN Mitogen-activated protein kinase 14	182	DDEMTGYVATRWY	65.4396	R	R.HTDDEM*T#GY#VATR.W	9	3	389.865	341.669	223.978	260.792	416.338	141.367	111.699	104.396	358.408	508.152	509.311	3365.97	790.275	548.001	376.419	372.694	916.353	240.974	154.436	133.908	439.929	508.152	468.974	4950.11	15.9648	11.0705	7.60425	7.52899	18.5118	4.86805	3.11986	2.70515	8.88725	10.2655	9.474
800	sp|P08493-2|MGP_HUMAN	MGP	MGP_HUMAN Isoform 2 of Matrix Gla protein	107	YRLCERYAMVYGY	97.7479	R	R.Y#AM*VYGYNAAYNR.Y	7	6	346.814	292.855	277.288	287.36	256.416	271.395	400.928	279.249	156.972	167.269	184.011	2920.56	703.008	469.708	466.013	410.66	564.367	462.619	554.33	358.192	192.675	167.269	169.438	4518.28	15.5592	10.3957	10.3139	9.08887	12.4907	10.2388	12.2686	7.92763	4.26434	3.70204	3.75005
1582	sp|P08238|HS90B_HUMAN	HSP90AB1	HS90B_HUMAN Heat shock protein HSP 90-beta	226	EREKEISDDEAEE	1000	R	K.EIS#DDEAEEEK.G	2	2	340.782	254.568	252.757	275.411	346.594	246.532	304.041	277.141	208.155	192.635	249.195	2947.81	690.782	408.301	424.786	393.585	762.847	420.238	420.372	355.489	255.501	192.635	229.459	4553.99	15.1687	8.96578	9.32777	8.64264	16.7512	9.2279	9.23084	7.80609	5.61047	4.23002	5.03863
474	sp|Q9Y490|TLN1_HUMAN	TLN1	TLN1_HUMAN Talin-1	26	EPSTMVYDACRII	87.265	R	K.TM*QFEPSTMVY#DACR.I	8	7	335.637	286	309.456	400.898	328.088	333.018	457.605	676.094	346.664	336.76	472.171	4282.39	680.352	458.714	520.074	572.917	722.115	567.662	632.692	867.225	425.513	336.76	434.775	6218.8	10.9403	7.37625	8.36294	9.21266	11.6118	9.12816	10.1739	13.9452	6.84236	5.41519	6.99131
417	sp|Q05655|KPCD_HUMAN	PRKCD	KPCD_HUMAN Protein kinase C delta type	334	QDNSGTYGKIWEG	24.437	U	K.TGVAGEDM*QDNSGTY#GK.I	2	2	329.242	220.581	213.415	261.287	289.074	176.235	191.531	166.799	263.173	436.844	549.382	3097.56	667.389	353.788	358.667	373.401	636.248	300.409	264.813	213.953	323.032	436.844	505.871	4434.42	15.0502	7.97823	8.08827	8.42052	14.348	6.77449	5.97177	4.82483	7.28466	9.85121	11.4078
1583	sp|P08238|HS90B_HUMAN	HSP90AB1	HS90B_HUMAN Heat shock protein HSP 90-beta	255	KIEDVGSDEEDDS	110.633	R	K.IEDVGS#DEEDDSGK.D	2	2	322.293	244.668	215.788	250.531	297.19	237.213	321.972	272.754	188.916	170.616	231.963	2753.9	653.304	392.422	362.654	358.03	654.11	404.352	445.164	349.861	231.885	170.616	213.591	4235.99	15.4227	9.264	8.56127	8.45209	15.4417	9.54564	10.5091	8.25926	5.47417	4.02778	5.0423
450	sp|P18433|PTPRA_HUMAN	PTPRA	PTPRA_HUMAN Receptor-type tyrosine-protein phosphatase alpha	798	IDAFSDYANFKxx	44.2778	R	K.VVQEYIDAFSDY#ANFK.-	19	5	309.1	257.539	258.732	234.922	272.701	323.104	413.966	315.459	303.91	290.79	285.332	3265.55	626.56	413.065	434.827	335.723	600.21	550.763	572.356	404.639	373.035	290.79	262.734	4864.7	12.8797	8.49107	8.93841	6.9012	12.3381	11.3216	11.7655	8.31785	7.66821	5.97755	5.40082
1470	sp|Q5VTE0|EF1A3_HUMAN	EEF1A1P5	EF1A3_HUMAN Putative elongation factor 1-alpha-like 3	141	EHALLAYTLGVKQ	30.8348	R	R.EHALLAY#TLGVK.Q	1	1	299.76	214.203	212.937	198.708	260.972	216.094	246.71	231.046	135.28	125.437	200.949	2342.1	607.627	343.559	357.864	283.97	574.395	368.353	341.106	296.362	166.049	125.437	185.034	3649.76	16.6484	9.4132	9.80514	7.78052	15.7379	10.0925	9.34599	8.12005	4.5496	3.43687	5.06975
1828	sp|Q8N0Y7|PGAM4_HUMAN	PGAM4	PGAM4_HUMAN Probable phosphoglycerate mutase 4	92	RLNERHYGGLTGL	27.1205	R	R.HY#GGLTGLNK.A	1	1	292.839	223.87	187.595	199.016	297.918	215.594	253.298	210.413	105.726	125.004	160.828	2272.1	593.598	359.064	315.274	284.411	655.713	367.501	350.214	269.897	129.774	125.004	148.091	3598.54	16.4955	9.97804	8.76116	7.90351	18.2216	10.2125	9.73212	7.50017	3.60629	3.47374	4.1153
2179	sp|P17096-3|HMGA1_HUMAN	HMGA1	HMGA1_HUMAN Isoform HMG-R of High mobility group protein HMG-I/HMG-Y	36	RKQPPVSPGTALV	15.0073	R	R.KQPPVS#PGTALVGSQK.E	1	1	291.131	208.625	229.595	238.217	168.548	171.798	305.728	219.226	190.77	129.342	167.721	2320.7	590.137	334.612	385.859	340.431	370.972	292.846	422.705	281.201	234.161	129.342	154.437	3536.7	16.6861	9.46113	10.9101	9.62566	10.4892	8.2802	11.9519	7.95093	6.62089	3.65714	4.3667
1395	sp|Q8IYB3|SRRM1_HUMAN	SRRM1	SRRM1_HUMAN Serine/arginine repetitive matrix protein 1	260	PEPKEPSPEKNSK	1000	R	K.VPKPEPIPEPKEPS#PEK.N	2	1	285.263	229.015	280.257	218.863	328.511	262.014	347.539	345.969	238.644	264.53	217.001	3017.61	578.241	367.315	471.002	312.773	723.047	446.629	480.514	443.773	292.924	264.53	199.815	4580.56	12.6238	8.019	10.2826	6.82826	15.7851	9.75052	10.4903	9.68818	6.39494	5.77506	4.36223
1629	sp|P07947|YES_HUMAN	YES1	YES_HUMAN Tyrosine-protein kinase Yes	426	LIEDNEYTARQGA	24.437	R	R.LIEDNEY#TAR.Q	2	2	283.935	153.548	144.055	121.453	200.802	78.2387	80.2246	72.0749	117.806	219.193	272.904	1744.23	575.55	246.274	242.099	173.566	441.961	133.365	110.92	92.4504	144.602	219.193	251.29	2631.27	21.8735	9.35952	9.20085	6.59627	16.7965	5.06848	4.21545	3.51353	5.4955	8.33031	9.55014
2359	sp|P35658-5|NU214_HUMAN	NUP214	NU214_HUMAN Isoform 5 of Nuclear pore complex protein Nup214	667	PAAKPGSPQAKSL	33.1903	R	R.ITPPAAKPGS#PQAK.S	1	1	274.319	216.376	257.132	273.942	291.991	243.885	334.539	338.979	205.55	200.577	242.827	2880.12	556.057	347.044	432.137	391.485	642.668	415.725	462.539	434.807	252.303	200.577	223.595	4358.94	12.7567	7.96167	9.91382	8.98121	14.7437	9.53731	10.6113	9.97508	5.78818	4.60151	5.12958
2257	sp|O00429-6|DNM1L_HUMAN	DNM1L	DNM1L_HUMAN Isoform 6 of Dynamin-1-like protein	629	IPIMPASPQKGHA	82.645	R	K.SKPIPIMPAS#PQK.G	3	3	269.445	178.217	194.99	200.416	198.123	162.657	192.65	159.025	143.813	153.992	201.465	2054.79	546.178	285.841	327.702	286.411	436.066	277.264	266.362	203.981	176.524	153.992	185.509	3145.83	17.362	9.08634	10.417	9.10448	13.8617	8.81371	8.46713	6.48417	5.61135	4.89511	5.89697
1502	sp|O15264|MK13_HUMAN	MAPK13	MK13_HUMAN Mitogen-activated protein kinase 13	182	DAEMTGYVVTRWY	35.7774	R	R.HADAEM*TGY#VVTR.W	5	5	264.142	493.464	247.803	252.06	582.325	208.618	230.666	195.828	321.714	388.57	321.141	3506.33	535.429	791.465	416.46	360.215	1281.69	355.61	318.922	251.188	394.888	388.57	295.706	5390.14	9.93349	14.6836	7.72633	6.68284	23.7784	6.59741	5.91677	4.66013	7.32611	7.20891	5.48606
779	sp|Q8N3R9|MPP5_HUMAN	MPP5	MPP5_HUMAN MAGUK p55 subfamily member 5	243	ITDERVYESIGQY	48.8739	R	R.VY#ESIGQYGGETVK.I	1	1	260.417	126.869	129.029	117.703	171.043	132.7	104.564	65.6906	84.1111	111.617	178.323	1482.07	527.878	203.485	216.847	168.207	376.463	226.199	144.571	84.2612	103.242	111.617	164.2	2326.97	22.6852	8.74463	9.31884	7.22859	16.1782	9.72077	6.21286	3.62107	4.43676	4.79668	7.05639
2374	sp|Q00536-2|CDK16_HUMAN	CDK16	CDK16_HUMAN Isoform 2 of Cyclin-dependent kinase 16	249	DKLGEGTYATVYK	24.437	R	K.LGEGT#YAT#VYK.G	2	2	260.364	191.156	211.065	218.6	248.696	202.148	229.132	202.341	132.711	118.772	155.064	2170.05	527.769	306.595	354.718	312.398	547.376	344.581	316.802	259.542	162.896	118.772	142.783	3394.23	15.549	9.03282	10.4506	9.20378	16.1267	10.1519	9.33353	7.64657	4.79921	3.49925	4.20663
1074	sp|Q8ND56-2|LS14A_HUMAN	LSM14A	LS14A_HUMAN Isoform 2 of Protein LSM14 homolog A	220	RRSPVSTRPLPSA	19.8465	R	R.SPVST#RPLPSASQK.A	1	1	256.021	177.192	194.327	204.216	224.835	179.441	258.22	214.692	161.734	142.577	196.658	2209.91	518.968	284.198	326.588	291.841	494.857	305.875	357.02	275.385	198.521	142.577	181.083	3376.91	15.3681	8.4159	9.6712	8.64224	14.6541	9.05785	10.5724	8.15494	5.87877	4.2221	5.36237
976	sp|P27986-4|P85A_HUMAN	PIK3R1	P85A_HUMAN Isoform 4 of Phosphatidylinositol 3-kinase regulatory subunit alpha	467	REYDRLYEEYTRT	59.2977	R	R.EYDRLY#EEYTR.T	3	3	253.33	211.273	207.546	303.045	239.705	302.3	407.239	458.615	276.922	283.313	396.493	3339.78	513.513	338.86	348.803	433.076	527.587	515.299	563.056	588.265	339.908	283.313	365.091	4816.77	10.6609	7.035	7.24142	8.99101	10.9531	10.698	11.6895	12.2129	7.05676	5.8818	7.57958
2684	sp|P16070|CD44_HUMAN	CD44	CD44_HUMAN CD44 antigen	697	VEDRKPSGLNGEA	55.37	R	R.KPS#GLNGEASK.S	1	1	249.176	301.981	348.812	377.104	252.712	284.126	421.013	396.59	448.652	416.346	430.925	3927.44	505.091	484.346	586.216	538.912	556.216	484.321	582.099	508.706	550.699	416.346	396.796	5609.75	9.00381	8.63401	10.45	9.60671	9.91517	8.63356	10.3766	9.06825	9.81682	7.42183	7.07333
597	sp|Q15464|SHB_HUMAN	SHB	SHB_HUMAN SH2 domain-containing adapter protein B	268	KGESAGYMEPYEA	73.3109	R	K.GESAGY#M*EPYEAQR.I	5	5	247.435	379.637	407.421	395.974	199.116	417.72	452.009	407.488	870.852	1065.38	1006.36	5849.4	501.562	608.898	684.715	565.88	438.25	712.045	624.955	522.684	1068.93	1065.38	926.66	7719.96	6.49696	7.88732	8.86941	7.33009	5.67685	9.22343	8.09531	6.77056	13.8463	13.8004	12.0034
696	sp|P07900-2|HS90A_HUMAN	HSP90AA1	HS90A_HUMAN Isoform 2 of Heat shock protein HSP 90-alpha	353	ERDKEVSDDEAEE	1000	R	K.EVS#DDEAEEK.E	1	1	247.433	161.673	198.213	186.129	256.304	159.083	216.855	177.238	171.171	144.495	153.536	2072.13	501.559	259.306	333.118	265.994	564.121	271.172	299.827	227.343	210.103	144.495	141.376	3218.41	15.584	8.05696	10.3504	8.26474	17.5279	8.42565	9.31598	7.06382	6.52817	4.48963	4.39271
483	sp|Q06124|PTN11_HUMAN	PTPN11	PTN11_HUMAN Tyrosine-protein phosphatase non-receptor type 11	62	IQNTGDYYDLYGG	24.437	R	K.IQNTGDY#YDLYGGEK.F	1	1	240.41	175.808	206.728	239.978	198.412	164.778	209.745	185.602	103.501	100.991	145.948	1971.9	487.323	281.977	347.429	342.949	436.701	280.88	289.997	238.071	127.043	100.991	134.389	3067.75	15.8854	9.19166	11.3252	11.1792	14.2352	9.15589	9.45308	7.76045	4.14124	3.29202	4.38071
1458	sp|Q9UQ35|SRRM2_HUMAN	SRRM2	SRRM2_HUMAN Serine/arginine repetitive matrix protein 2	2581	ALKRVPSPTPAPK	20.1669	R	K.RVPS#PTPAPK.E	1	1	239.843	186.531	195.864	191.064	226.819	209.147	312.502	250.572	161.103	162.884	197.283	2333.61	486.173	299.176	329.17	273.046	499.224	356.512	432.071	321.408	197.746	162.884	181.658	3539.07	13.7373	8.45351	9.30105	7.7152	14.1061	10.0736	12.2086	9.08171	5.58751	4.60246	5.13294
2427	sp|P11413-2|G6PD_HUMAN	G6PD	G6PD_HUMAN Isoform Long of Glucose-6-phosphate 1-dehydrogenase	447	QPNEAVYTKMMTK	24.437	R	R.VQPNEAVY#TK.M	2	2	236.908	182.319	188.123	183.978	229.039	196.025	229.884	206.882	135.956	146.519	167.388	2103.02	480.223	292.42	316.161	262.92	504.111	334.144	317.842	265.367	166.879	146.519	154.131	3240.72	14.8184	9.02332	9.7559	8.11302	15.5555	10.3108	9.80776	8.18852	5.14945	4.52118	4.75608
2514	sp|Q8N3F8|MILK1_HUMAN	MICALL1	MILK1_HUMAN MICAL-like protein 1	640	PFNRKPSPAASPA	36.5564	R	R.KPS#PAASPATK.K	1	1	234.765	61.6802	53.5215	51.2566	233.727	60.6047	64.6053	56.5262	44.4945	49.9082	50.9538	962.043	475.88	98.9285	89.9487	73.25	514.429	103.307	89.3244	72.5061	54.6148	49.9082	46.9183	1669.01	28.5126	5.92736	5.38933	4.38882	30.8223	6.18968	5.35192	4.34425	3.27228	2.99028	2.81114
2161	sp|Q8IZP0|ABI1_HUMAN	ABI1	ABI1_HUMAN Abl interactor 1	183	PTQKPPSPPMSGR	19.8465	R	R.TNPPTQKPPS#PPM*SGR.G	1	1	226.839	169.487	172.481	179.352	204.253	172.571	207.095	174.478	147.647	134.528	166.858	1955.59	459.813	271.839	289.872	256.308	449.557	294.163	286.334	223.803	181.229	134.528	153.643	3001.09	15.3215	9.05802	9.65891	8.54051	14.9798	9.80189	9.54099	7.45738	6.03879	4.48263	5.11958
1096	sp|P54756|EPHA5_HUMAN	EPHA5	EPHA5_HUMAN Ephrin type-A receptor 5	833	DDPEAAYTTRGGK	30.8348	R	R.VLEDDPEAAY#TTR.G	2	2	220.943	181.274	152.278	117.888	217.172	103.212	106.844	111.012	210.494	315.961	383.592	2120.67	447.862	290.744	255.919	168.471	477.991	175.934	147.724	142.395	258.371	315.961	353.211	3034.58	14.7586	9.58102	8.43342	5.55171	15.7515	5.79764	4.868	4.69239	8.51423	10.412	11.6395
2016	sp|Q92615|LAR4B_HUMAN	LARP4B	LAR4B_HUMAN La-related protein 4B	718	PAGGRPSPSAMGK	20.1669	R	R.RPAGGRPS#PSAM*GK.R	1	1	220.733	167.281	146.447	142.306	170.598	146.964	160.954	116.531	105.986	96.5923	99.9123	1574.3	447.436	268.302	246.119	203.367	375.482	250.514	222.537	149.474	130.093	96.5923	91.9993	2481.92	18.0279	10.8103	9.9165	8.19395	15.1287	10.0936	8.96634	6.02253	5.24163	3.89184	3.70678
312	sp|Q09666|AHNK_HUMAN	AHNAK	AHNK_HUMAN Neuroblast differentiation-associated protein AHNAK	836	PNVKGEYDVTMPK	73.3109	U	K.GEY#DVTMPK.V	6	6	212.846	1943.54	1283.96	1386.36	229.418	1211.72	1030.27	976.243	2534.13	4008.49	2779.08	17596.1	431.449	3117.24	2157.83	1981.23	504.945	2065.49	1424.47	1252.22	3110.52	4008.49	2558.98	22612.9	1.90798	13.7853	9.5425	8.7615	2.233	9.13415	6.29937	5.53766	13.7555	17.7266	11.3165
358	sp|P00533|EGFR_HUMAN	EGFR	EGFR_HUMAN Epidermal growth factor receptor	1092	FLPVPEYINQSVP	66.9932	R	R.YSSDPTGALTEDSIDDTFLPVPEY#INQSVPK.R	19	14	208.625	1133.44	995.751	607.887	175.725	687.524	429.478	479.538	1080.04	1460.59	1044.72	8303.32	422.892	1817.92	1673.47	868.72	386.767	1171.95	593.804	615.102	1325.7	1460.59	961.978	11298.9	3.74278	16.0894	14.8109	7.68854	3.42305	10.3723	5.25542	5.44392	11.733	12.9269	8.51392
690	sp|P05023|AT1A1_HUMAN	ATP1A1	AT1A1_HUMAN Sodium/potassium-transporting ATPase subunit alpha-1	10	GVGRDKYEPAAVS	124.374	R	R.DKY#EPAAVSEQGDK.K	3	3	206.935	313.239	263.356	381.826	177.417	309.465	278.417	351.152	353.701	467.935	638.141	3741.58	419.466	502.403	442.598	545.661	390.492	527.513	384.944	450.423	434.151	467.935	587.6	5153.18	8.13994	9.74938	8.58882	10.5888	7.57768	10.2366	7.47002	8.74066	8.4249	9.0805	11.4027
2580	sp|Q7Z5L9|I2BP2_HUMAN	IRF2BP2	I2BP2_HUMAN Interferon regulatory factor 2-binding protein 2	360	ARKRKPSPEPEGE	1000	R	K.RKPS#PEPEGEVGPPK.I	1	1	206.878	141.634	152.929	160.148	175.791	148.831	232.717	220.581	164.49	160.411	173.551	1937.96	419.351	227.166	257.014	228.864	386.913	253.698	321.758	282.939	201.904	160.411	159.806	2899.82	14.4613	7.83378	8.86309	7.89235	13.3426	8.74873	11.0958	9.75711	6.96263	5.53174	5.51088
1161	sp|Q99959|PKP2_HUMAN	PKP2	PKP2_HUMAN Plakophilin-2	631	KYSQNIYIQNRNI	99.2279	R	K.YSQNIY#IQNR.N	2	2	205.432	189.363	184.936	195.803	182.521	183.595	237.728	224.595	342.885	349.727	416.467	2713.05	416.42	303.718	310.805	279.819	401.726	312.955	328.687	288.088	420.875	349.727	383.483	3796.3	10.9691	8.00036	8.18704	7.37083	10.582	8.24369	8.65808	7.58864	11.0864	9.21231	10.1015
1914	sp|Q00526|CDK3_HUMAN	CDK3	CDK3_HUMAN Cyclin-dependent kinase 3	15	KIGEGTYGVVYKA	115.01	R	K.IGEGT#Y#GVVYK.A	17	1	203.256	151.955	138.029	126.273	138.028	93.164	176.019	186.732	72.569	93.3463	111.37	1490.74	412.009	243.72	231.972	180.454	303.797	158.807	243.366	239.52	89.075	93.3463	102.549	2298.62	17.9242	10.6029	10.0918	7.85055	13.2165	6.90881	10.5875	10.4202	3.87516	4.06098	4.46136
1380	sp|Q13113|PDZ1I_HUMAN	PDZK1IP1	PDZ1I_HUMAN PDZK1-interacting protein 1	99	SEHENAYENVPEE	28.2181	U	R.SSEHENAY#ENVPEEEGK.V	1	1	201.033	111.446	134.901	84.3485	140.533	155.594	87.5067	109.448	61.1089	120.611	171.103	1377.63	407.503	178.748	226.716	120.541	309.31	265.224	120.988	140.389	75.0081	120.611	157.552	2122.59	19.1984	8.42122	10.6811	5.67896	14.5723	12.4953	5.70002	6.61404	3.5338	5.68225	7.42262
1398	sp|Q8IYB3|SRRM1_HUMAN	SRRM1	SRRM1_HUMAN Serine/arginine repetitive matrix protein 1	616	PKRRTASPPPPPK	17.0091	R	R.TAS#PPPPPK.R	1	1	199.937	159.19	166.73	171.847	192.773	170.786	247.525	193.464	171.349	183.35	195.558	2052.51	405.281	255.324	280.208	245.583	424.29	291.121	342.232	248.156	210.322	183.35	180.07	3065.94	13.2188	8.32777	9.13938	8.01005	13.8388	9.49534	11.1624	8.09398	6.85997	5.98021	5.87325
2284	sp|Q9Y3L5|RAP2C_HUMAN	RAP2C	RAP2C_HUMAN Ras-related protein Rap-2c	166	IVRQMNYSSLPEK	17.0091	U	R.QM*NY#SSLPEK.Q	1	1	198.856	176.087	168.778	191.823	198.223	179.53	253.72	213.4	216.994	202.193	221.09	2220.7	403.09	282.426	283.65	274.131	436.286	306.027	350.798	273.728	266.349	202.193	203.58	3282.26	12.2809	8.60461	8.64192	8.35189	13.2922	9.32368	10.6877	8.33964	8.11482	6.16018	6.20244
511	sp|Q9H5V8|CDCP1_HUMAN	CDCP1	CDCP1_HUMAN CUB domain-containing protein 1	806	ESESEPYTFSHPN	17.0091	R	R.SPPESESEPY#TFSHPNNGDVSSK.D	1	1	198.338	110.066	86.8154	24.4257	208.633	80.8712	64.3101	62.1535	103.842	238.491	211.942	1389.89	402.041	176.535	145.903	34.9063	459.199	137.853	88.9163	79.7241	127.461	238.491	195.156	2086.19	19.2716	8.46208	6.99375	1.67321	22.0114	6.60789	4.26215	3.82153	6.10977	11.4319	9.35469
1666	sp|O95490-6|LPHN2_HUMAN	LPHN2	LPHN2_HUMAN Isoform 6 of Latrophilin-2	1421	SENEDIYYKSMPN	30.8348	R	R.SENEDIY#YK.S	3	3	194.896	348.449	325.052	293.803	212.415	305.045	312.561	291.504	440.19	617.733	558.576	3900.23	395.063	558.876	546.285	419.868	467.522	519.979	432.152	373.911	540.312	617.733	514.337	5386.04	7.33495	10.3764	10.1426	7.79549	8.68026	9.6542	8.02356	6.94223	10.0317	11.4692	9.54945
552	sp|P42685|FRK_HUMAN	FRK	FRK_HUMAN Tyrosine-protein kinase FRK	132	AEKQLLYSENKTG	48.8739	U	K.QLLY#SENK.T	2	2	194.572	174.304	175.753	143.696	201.706	203.241	233.425	213.469	137.933	125.666	107.669	1911.44	394.407	279.565	295.372	205.353	443.951	346.445	322.737	273.817	169.307	125.666	99.1415	2955.76	13.3437	9.4583	9.99311	6.94756	15.0199	11.721	10.9189	9.26383	5.72802	4.25156	3.35418
884	sp|P29597|TYK2_HUMAN	TYK2	TYK2_HUMAN Non-receptor tyrosine-protein kinase TYK2	292	AEGEPCYIRDSGV	1000	R	R.LLAQAEGEPCY#IR.D	2	2	192.871	200.957	174.942	120.792	183.868	97.6301	89.081	83.991	165.97	227.729	151.572	1689.4	390.959	322.314	294.009	172.622	404.691	166.42	123.165	107.735	203.72	227.729	139.568	2552.93	15.3141	12.6253	11.5165	6.76171	15.852	6.51878	4.82445	4.22006	7.97985	8.92029	5.46695
697	sp|P07900-2|HS90A_HUMAN	HSP90AA1	HS90A_HUMAN Isoform 2 of Heat shock protein HSP 90-alpha	385	EIEDVGSDEEEEK	93.5557	R	K.ESEDKPEIEDVGS#DEEEEK.K	2	2	189.229	135.185	132.005	147.26	178.159	130.233	167.075	129.159	105.085	99.0009	128.28	1540.67	383.576	216.823	221.848	210.447	392.126	221.995	231	165.672	128.987	99.0009	118.121	2389.6	16.0519	9.07364	9.28392	8.80681	16.4097	9.29005	9.66692	6.93307	5.39784	4.143	4.94312
899	sp|Q01082|SPTB2_HUMAN	SPTBN1	SPTB2_HUMAN Spectrin beta chain, non-erythrocytic 1	2102	RKRRPPSPEPSTK	47.0452	R	R.RPPS#PEPSTK.V	1	1	189.062	107.925	105.57	118.154	137.29	160.935	205.207	173.931	101.416	99.3957	299.155	1698.04	383.238	173.101	177.422	168.852	302.174	274.329	283.723	223.101	124.483	99.3957	275.462	2485.28	15.4203	6.96504	7.13892	6.79408	12.1585	11.0382	11.4161	8.97689	5.00882	3.99937	11.0837
2647	sp|Q8TEW0|PARD3_HUMAN	PARD3	PARD3_HUMAN Partitioning defective 3 homolog	489	GGSAPIYVKNILP	58.5514	R	R.DVTIGGSAPIY#VK.N	1	1	188.128	412.638	451.193	395.01	149.588	310.933	275.611	317.556	347.375	472.945	527.02	3848	381.344	661.828	758.278	564.502	329.242	530.015	381.065	407.328	426.386	472.945	485.28	5398.21	7.06426	12.2601	14.0468	10.4572	6.09909	9.81834	7.0591	7.54561	7.89865	8.76113	8.98964
2780	sp|Q07352|TISB_HUMAN	ZFP36L1	TISB_HUMAN Zinc finger protein 36, C3H1 type-like 1	54	GFPRRHSVTLPSS	20.1669	R	R.RHS#VTLPSSK.F	1	1	181.734	110.897	123.494	147.223	161.181	145.06	146.483	143.9	125.028	131.264	176.936	1593.2	368.384	177.867	207.544	210.394	354.756	247.27	202.53	184.581	153.465	131.264	162.922	2400.98	15.3431	7.40809	8.64415	8.76284	14.7755	10.2987	8.4353	7.68774	6.39179	5.46713	6.78567
1954	sp|P04075-2|ALDOA_HUMAN	ALDOA	ALDOA_HUMAN Isoform 2 of Fructose-bisphosphate aldolase A	258	DLKRCQYVTEKVL	59.2977	R	K.RCQY#VTEK.V	1	1	180.316	134.111	156.986	172.477	205.058	121.864	161.07	131.257	88.951	102.069	62.5633	1516.72	365.51	215.1	263.831	246.484	451.33	207.729	222.698	168.363	109.183	102.069	57.6083	2409.91	15.167	8.92566	10.9478	10.228	18.7281	8.61981	9.24093	6.98629	4.53059	4.23541	2.39048
354	sp|P00533|EGFR_HUMAN	EGFR	EGFR_HUMAN Epidermal growth factor receptor	1172	SLDNPDYQQDFFP	143.285	R	K.GSHQIS#LDNPDY#QQDFFPK.E	14	7	176.899	553.676	565.256	528.406	156.468	468.563	379.428	379.824	536.229	797.405	826.524	5368.68	358.582	888.039	949.974	755.135	344.384	798.712	524.604	487.199	658.195	797.405	761.063	7323.29	4.89646	12.1262	12.972	10.3114	4.70259	10.9065	7.16349	6.65274	8.98769	10.8886	10.3924
996	sp|P14618-2|KPYM_HUMAN	PKM	KPYM_HUMAN Isoform M1 of Pyruvate kinase PKM	175	EVGSKIYVDDGLI	127.526	R	K.IY#VDDGLISLQVK.Q	3	3	174.27	154.382	144.568	156.889	177.338	152.657	177.163	195.332	88.9465	77.8415	137.475	1636.86	353.253	247.613	242.962	224.208	390.318	260.219	244.948	250.551	109.178	77.8415	126.587	2527.68	13.9754	9.79606	9.61205	8.8701	15.4418	10.2948	9.69064	9.91232	4.31928	3.07956	5.00803
1473	sp|Q9Y446|PKP3_HUMAN	PKP3	PKP3_HUMAN Plakophilin-3	390	AMRNLIYDNADNK	1000	U	R.NLIY#DNADNK.L	2	2	174.055	144.193	126.274	127.201	164.371	141.652	181.236	183.985	137.697	147.405	149.364	1677.43	352.817	231.27	212.218	181.78	361.779	241.459	250.58	235.997	169.017	147.405	137.534	2521.86	13.9904	9.17064	8.41513	7.20819	14.3457	9.57466	9.93631	9.35809	6.70208	5.8451	5.45368
945	sp|P07355-2|ANXA2_HUMAN	ANXA2	ANXA2_HUMAN Isoform 2 of Annexin A2	256	YKSYSPYDMLESI	30.8348	R	K.SYSPY#DM*LESIR.K	9	8	170.929	201.558	220.724	463.573	198.381	306.744	496.414	1075.98	357.217	401.823	666.198	4559.54	346.481	323.278	370.95	662.484	436.633	522.876	686.35	1380.16	438.467	401.823	613.435	6182.94	5.60383	5.22856	5.99958	10.7147	7.0619	8.45675	11.1007	22.3221	7.09156	6.49889	9.92142
415	sp|Q05655|KPCD_HUMAN	PRKCD	KPCD_HUMAN Protein kinase C delta type	374	LKGRGEYFAIKAL	1000	R	K.GRGEY#FAIK.A	1	1	165.805	130.54	142.301	154.315	160.451	130.263	179.688	148.01	98.5551	93.1604	100.095	1503.18	336.094	209.372	239.153	220.528	353.151	222.046	248.44	189.852	120.972	93.1604	92.1675	2324.94	14.4561	9.0055	10.2864	9.48536	15.1897	9.55061	10.6859	8.16591	5.20322	4.00701	3.9643
780	sp|Q8N3R9|MPP5_HUMAN	MPP5	MPP5_HUMAN MAGUK p55 subfamily member 5	245	DERVYESIGQYGG	31.2747	R	R.VYES#IGQYGGETVK.I	1	1	163.095	79.1387	87.2739	79.8824	116.305	94.2842	64.8323	45.5606	68.4984	77.287	114.34	990.498	330.601	126.93	146.673	114.158	255.986	160.717	89.6383	58.4405	84.0784	77.287	105.284	1549.79	21.3319	8.19013	9.46404	7.36604	16.5174	10.3702	5.78388	3.77086	5.42514	4.98692	6.79342
1628	sp|P07947|YES_HUMAN	YES1	YES_HUMAN Tyrosine-protein kinase Yes	223	LDNGGYYITTRAQ	48.8739	R	K.LDNGGYY#ITTR.A	1	1	162.018	153.889	155.312	145.045	181.147	185.359	229.294	193.771	147.786	136.558	137.328	1827.51	328.418	246.823	261.018	207.282	398.702	315.962	317.025	248.549	181.4	136.558	126.452	2768.19	11.864	8.91639	9.42919	7.48799	14.403	11.414	11.4524	8.97877	6.55304	4.93312	4.56803
2271	sp|Q05682-4|CALD1_HUMAN	CALD1	CALD1_HUMAN Isoform 4 of Caldesmon	202	EKPKRGSIGENQI	1000	R	K.RGS#IGENQIK.D	1	1	161.232	119.21	128.977	177.041	161.985	150.051	192.307	226.603	162.668	166.875	203.12	1850.07	326.825	191.201	216.76	253.006	356.527	255.777	265.887	290.663	199.666	166.875	187.033	2710.22	12.059	7.0548	7.99786	9.33526	13.1549	9.43751	9.81053	10.7247	7.36717	6.15725	6.90102
874	sp|Q92796|DLG3_HUMAN	DLG3	DLG3_HUMAN Disks large homolog 3	673	EVDGQDYHFVVSR	105.418	R	R.DNEVDGQDY#HFVVSR.E	7	7	155.982	169.47	256.589	565.282	161.133	436.073	829.657	937.526	535.311	579.456	755.535	5382.01	316.183	271.812	431.225	807.834	354.652	743.329	1147.1	1202.56	657.068	579.456	695.697	7206.91	4.38721	3.77154	5.98349	11.2092	4.92099	10.3141	15.9166	16.6862	9.11719	8.04028	9.65318
2192	sp|Q13627|DYR1A_HUMAN	DYRK1A	DYR1A_HUMAN Dual specificity tyrosine-phosphorylation-regulated kinase 1A	321	GQRIYQYIQSRFY	73.3109	R	R.IYQY#IQSR.F	2	2	155.715	128.649	124.33	130.362	158.882	130.098	170.764	167.586	103.001	111.624	132.344	1513.35	315.642	206.339	208.949	186.298	349.697	221.764	236.101	214.962	126.429	111.624	121.863	2299.67	13.7256	8.97256	9.08607	8.1011	15.2064	9.64332	10.2667	9.34751	5.49769	4.85392	5.29915
850	sp|P18206|VINC_HUMAN	VCL	VINC_HUMAN Vinculin	692	PGNQAAYEHFETM	84.3587	R	R.NPGNQAAY#EHFETMK.N	2	2	152.877	126.027	106.207	145.893	156.098	122.596	166.216	146.931	116.771	123.416	149.707	1512.74	309.889	202.134	178.492	208.492	343.568	208.977	229.813	188.469	143.33	123.416	137.85	2274.43	13.6249	8.88725	7.84775	9.1668	15.1057	9.1881	10.1042	8.28641	6.30181	5.42623	6.06085
664	sp|P23528|COF1_HUMAN	CFL1	COF1_HUMAN Cofilin-1	140	ELQANCYEEVKDR	1000	R	K.HELQANCY#EEVK.D	3	3	152.365	187.488	213.892	496.105	141.433	246.287	449.129	993.742	282.278	282.112	650.532	4095.36	308.851	300.712	359.469	708.975	311.291	419.82	620.973	1274.67	346.482	282.112	599.01	5532.37	5.58262	5.4355	6.49756	12.815	5.62673	7.58843	11.2244	23.0403	6.26282	5.09929	10.8274
1778	sp|Q8NHW5|RLA0L_HUMAN	RPLP0P6	RLA0L_HUMAN 60S acidic ribosomal protein P0-like	24	IQLLDDYPKCFIV	1000	R	K.IIQLLDDY#PK.C	3	2	151.656	113.933	102.286	111.404	119.674	113.208	137.382	122.246	79.4348	85.7534	108.074	1245.05	307.414	182.736	171.902	159.206	263.401	192.974	189.947	156.805	97.5023	85.7534	99.5143	1907.16	16.119	9.58161	9.01354	8.34782	13.8112	10.1184	9.95969	8.22195	5.11245	4.49641	5.21794
2614	sp|P08758|ANXA5_HUMAN	ANXA5	ANXA5_HUMAN Annexin A5	94	SRLYDAYELKHAL	53.5337	R	R.LYDAY#ELK.H	1	1	150.722	106.244	107.375	113.419	126.718	104.393	131.103	111.698	89.3444	75.3998	85.5308	1201.95	305.52	170.404	180.456	162.085	278.905	177.948	181.265	143.274	109.666	75.3998	78.7567	1863.68	16.3934	9.14343	9.68277	8.69704	14.9653	9.54823	9.72617	7.68771	5.88438	4.04575	4.22587
639	sp|Q13523|PRP4B_HUMAN	PRPF4B	PRP4B_HUMAN Serine/threonine-protein kinase PRP4 homolog	849	DNDITPYLVSRFY	34.0728	R	K.LCDFGSASHVADNDITPY#LVSR.F	4	3	149.587	127.291	116.003	116.918	143.498	161.099	210.164	215.563	123.413	144.94	177.828	1686.3	303.221	204.161	194.955	167.086	315.836	274.61	290.576	276.502	151.484	144.94	163.744	2487.11	12.1917	8.20874	7.83861	6.71806	12.6989	11.0413	11.6833	11.1174	6.09074	5.82763	6.58371
1464	sp|P29317|EPHA2_HUMAN	EPHA2	EPHA2_HUMAN Ephrin type-A receptor 2	772	DDPEATYTTSGGK	17.0091	U	R.VLEDDPEATY#TTSGGK.I	1	1	148.369	165.25	140.821	145.982	128.356	100.735	125.291	111.04	202.423	276.958	381.299	1926.53	300.751	265.044	236.665	208.62	282.509	171.713	173.229	142.431	248.464	276.958	351.1	2657.49	11.3171	9.9735	8.90561	7.85029	10.6307	6.46149	6.51855	5.35963	9.3496	10.4218	13.2117
997	sp|P14618-2|KPYM_HUMAN	PKM	KPYM_HUMAN Isoform M1 of Pyruvate kinase PKM	105	ASDPILYRPVAVA	15.5899	R	R.TATESFASDPILY#RPVAVALDTK.G	2	2	146.924	109.267	95.8025	116.46	153.194	107.704	127.366	102.544	69.9816	73.2963	95.3243	1197.86	297.822	175.253	161.006	166.431	337.177	183.591	176.099	131.533	85.899	73.2963	87.7746	1875.88	15.8764	9.34241	8.58297	8.87216	17.9743	9.78692	9.38751	7.01181	4.57913	3.9073	4.67911
2765	sp|Q9BWU0|NADAP_HUMAN	SLC4A1AP	NADAP_HUMAN Kanadaptin	82	KPALPVSPAARSK	1000	U	K.KPALPVS#PAAR.S	1	1	146.453	111.763	122.976	137.228	134.319	121.518	150.229	108.959	99.7633	94.0626	105.386	1332.66	296.868	179.256	206.675	196.111	295.634	207.14	207.709	139.762	122.455	94.0626	97.0396	2042.71	14.533	8.77538	10.1177	9.60051	14.4726	10.1404	10.1683	6.84198	5.99471	4.6048	4.75053
1911	sp|Q96NY8|PVRL4_HUMAN	PVRL4	PVRL4_HUMAN Poliovirus receptor-related protein 4	502	PTGNGIYINGRGH	39.6629	R	R.AKPTGNGIY#INGR.G	1	1	143.244	144.023	148.364	151.708	111.404	118.435	109.904	92.0658	154.829	175.426	182.485	1531.89	290.362	230.997	249.342	216.804	245.197	201.884	151.955	118.093	190.045	175.426	168.032	2238.14	12.9734	10.321	11.1406	9.6868	10.9554	9.0202	6.78935	5.27639	8.49121	7.83802	7.50767
1758	sp|Q12959-2|DLG1_HUMAN	DLG1	DLG1_HUMAN Isoform 2 of Disks large homolog 1	782	EVDGRDYHFVTSR	97.7479	R	R.DY#HFVTSR.E	3	3	141.785	112.235	132.19	156.478	136.767	161.266	250.549	388.883	168.486	176.908	214.808	2040.35	287.405	180.013	222.159	223.619	301.022	274.894	346.414	498.819	206.808	176.908	197.795	2915.86	9.85661	6.1736	7.61901	7.66908	10.3236	9.42755	11.8803	17.1071	7.09253	6.06709	6.78344
1627	sp|P07947|YES_HUMAN	YES1	YES_HUMAN Tyrosine-protein kinase Yes	222	KLDNGGYYITTRA	48.8739	R	K.LDNGGY#YITTR.A	2	2	140.231	144.13	145.276	139.032	158.38	171.511	198.791	169.623	173.18	191.152	174.69	1806	284.254	231.169	244.152	198.689	348.591	292.357	274.852	217.575	212.57	191.152	160.855	2656.22	10.7015	8.70296	9.19174	7.48014	13.1236	11.0065	10.3475	8.19116	8.00275	7.19639	6.05578
0	sp|P46109|CRKL_HUMAN	CRKL	CRKL_HUMAN Crk-like protein	251	KRVPCAYDKTALA	1000	U	K.RVPCAY#DK.T	1	1	139.774	176.405	150.241	170.241	117.401	177.202	222.215	170.476	384.817	439.096	493.333	2641.2	283.328	282.935	252.495	243.289	258.397	302.059	307.238	218.669	472.344	439.096	454.261	3514.11	8.06257	8.05139	7.18519	6.92319	7.35312	8.5956	8.74299	6.2226	13.4414	12.4952	12.9268
872	sp|P43405|KSYK_HUMAN	SYK	KSYK_HUMAN Tyrosine-protein kinase SYK	323	TVSFNPYEPELAP	61.3249	R	R.QESTVSFNPY#EPELAPWAADK.G	1	1	138.423	159.694	199.379	77.9264	94.721	56.6162	88.566	98.356	142.483	174.55	173.753	1404.47	280.59	256.133	335.078	111.363	208.479	96.5078	122.453	126.161	174.891	174.55	159.992	2046.2	13.7127	12.5175	16.3756	5.44245	10.1886	4.71645	5.98441	6.16563	8.54714	8.53047	7.81898
2817	sp|Q96G03|PGM2_HUMAN	PGM2	PGM2_HUMAN Phosphoglucomutase-2	165	GIMITASHNPKQD	20.1669	R	K.LCAGIMITAS#HNPK.Q	1	1	133.31	120.105	80.7685	89.8448	182.464	145.327	161.525	120.97	62.3176	68.2638	65.6777	1230.57	270.225	192.636	135.74	128.396	401.601	247.725	223.327	155.168	76.4918	68.2638	60.476	1960.05	13.7867	9.8281	6.92534	6.55063	20.4893	12.6387	11.394	7.91653	3.90255	3.48276	3.08543
1463	sp|P29317|EPHA2_HUMAN	EPHA2	EPHA2_HUMAN Ephrin type-A receptor 2	575	QSPEDVYFSKSEQ	59.2977	U	R.QSPEDVY#FSK.S	2	2	132.829	111.907	108.511	142.389	102.887	98.3352	146.38	125.56	192.689	208.005	314.947	1684.44	269.251	179.487	182.365	203.486	226.452	167.622	202.388	161.055	236.517	208.005	290.003	2326.63	11.5726	7.71447	7.83815	8.74596	9.73304	7.20449	8.69875	6.92225	10.1656	8.94017	12.4645
3	sp|O60716|CTND1_HUMAN	CTNND1	CTND1_HUMAN Catenin delta-1	280	RFHPEPYGLEDDQ	1000	R	R.FHPEPY#GLEDDQR.S	2	2	128.504	190.816	191.284	155	135.19	148.449	175.908	176.06	193.587	297.085	235.543	2027.42	260.484	306.048	321.473	221.508	297.55	253.046	243.214	225.831	237.618	297.085	216.888	2880.74	9.04224	10.6239	11.1594	7.68925	10.3289	8.78405	8.44273	7.83934	8.24849	10.3128	7.52888
1653	sp|Q9BXB4|OSB11_HUMAN	OSBPL11	OSB11_HUMAN Oxysterol-binding protein-related protein 11	189	ISQRRPSQNAISF	30.6121	U	R.RPS#QNAISFFNVGHSK.L	2	2	127.305	106.384	122.356	143.293	92.9818	128.977	155.493	164.031	243.078	259.723	280.376	1824	258.054	170.629	205.632	204.777	204.651	219.854	214.987	210.402	298.367	259.723	258.171	2505.25	10.3005	6.81087	8.20805	8.17394	8.16891	8.77575	8.58145	8.39846	11.9097	10.3672	10.3052
925	sp|Q9UBC2-2|EP15R_HUMAN	EPS15L1	EP15R_HUMAN Isoform 2 of Epidermal growth factor receptor substrate 15-like 1	229	VPVLPASPPPKDS	110.838	R	K.TVFPGAVPVLPAS#PPPK.D	1	1	126.393	123.612	127.043	166.147	93.6099	95.9953	123.308	120.031	209.502	198.835	281.696	1666.17	256.205	198.261	213.51	237.438	206.034	163.633	170.488	153.964	257.153	198.835	259.385	2314.91	11.0676	8.56455	9.22327	10.2569	8.90031	7.06868	7.36479	6.65097	11.1086	8.58933	11.205
1613	sp|P45984-4|MK09_HUMAN	MAPK9	MK09_HUMAN Isoform Beta-2 of Mitogen-activated protein kinase 9	185	NFMMTPYVVTRYY	31.2747	R	R.TACTNFM*M*TPY#VVTR.Y	2	2	123.535	81.5666	102.345	118.236	110.256	83.708	145.201	153.556	101.502	109.593	179.319	1308.82	250.412	130.824	172.002	168.969	242.671	142.688	200.757	196.965	124.589	109.593	165.117	1904.59	13.1478	6.8689	9.03091	8.87169	12.7414	7.49183	10.5407	10.3416	6.54152	5.75417	8.66943
1256	sp|Q13443|ADAM9_HUMAN	ADAM9	ADAM9_HUMAN Disintegrin and metalloproteinase domain-containing protein 9	769	PREVPIYANRFAV	1000	U	R.EVPIY#ANR.F	1	1	122.404	82.752	85.0504	101.487	104.348	83.2987	72.4882	69.3461	95.5534	108.905	149.783	1075.42	248.12	132.726	142.936	145.033	229.667	141.991	100.223	88.9501	117.287	108.905	137.92	1593.76	15.5682	8.32783	8.9685	9.10009	14.4104	8.90918	6.28849	5.58115	7.35915	6.8332	8.65378
851	sp|P18206|VINC_HUMAN	VCL	VINC_HUMAN Vinculin	822	SFLDSGYRILGAV	30.8348	R	K.SFLDSGY#R.I	1	1	122.283	87.497	89.7238	88.6788	110.153	81.6469	114.934	102.081	59.9805	52.0797	76.0022	985.06	247.873	140.336	150.79	126.729	242.444	139.175	158.91	130.939	73.6231	52.0797	69.9828	1532.88	16.1704	9.15504	9.83705	8.26738	15.8162	9.0793	10.3667	8.54203	4.80292	3.3975	4.56544
1445	sp|P15941-2|MUC1_HUMAN	MUC1	MUC1_HUMAN Isoform 2 of Mucin-1	1238	STDRSPYEKVSAG	20.1669	R	R.YVPPSSTDRSPY#EK.V	1	1	122.119	86.2868	92.5193	85.3484	87.7777	78.7979	67.9683	63.8437	68.291	76.9601	84.6019	914.514	247.54	138.395	155.489	121.97	193.197	134.319	93.9741	81.8922	83.8239	76.9601	77.9014	1405.46	17.6128	9.84694	11.0632	8.67828	13.7462	9.55691	6.68635	5.82672	5.96415	5.47579	5.54276
2287	sp|P55196-5|AFAD_HUMAN	MLLT4	AFAD_HUMAN Isoform 5 of Afadin	1181	VANQPPSPGGKSA	91.0872	R	R.SSPNVANQPPS#PGGK.S	1	1	120.165	111.24	133.169	143.172	82.1571	129.563	159.963	122.305	114.477	133.557	142.077	1391.84	243.58	178.417	223.804	204.605	180.826	220.852	221.168	156.881	140.515	133.557	130.824	2035.03	11.9694	8.7673	10.9976	10.0542	8.88569	10.8525	10.868	7.70902	6.90479	6.56291	6.42861
2308	sp|Q6Y7W6-3|PERQ2_HUMAN	GIGYF2	PERQ2_HUMAN Isoform 2 of PERQ amino acid-rich with GYF domain-containing protein 2	26	SGGSITSPPLSPA	30.8348	R	R.ALSSGGSITS#PPLSPALPK.Y	1	1	119.25	71.5921	74.9234	90.2314	73.2269	56.2471	94.6871	92.2535	47.9967	44.9878	83.5731	848.969	241.724	114.826	125.917	128.948	161.171	95.8786	130.916	118.333	58.9136	44.9878	76.9541	1298.57	18.6147	8.84251	9.69657	9.93	12.4114	7.3834	10.0816	9.11259	4.5368	3.46441	5.92607
1872	sp|P08621|RU17_HUMAN	SNRNP70	RU17_HUMAN U1 small nuclear ribonucleoprotein 70 kDa	226	DERPGPSPLPHRD	22.5294	R	R.YDERPGPS#PLPHR.D	1	1	118.641	107.087	109.228	124.534	126.324	142.464	171.786	129.567	122.009	118.405	139.902	1409.95	240.49	171.757	183.569	177.969	278.038	242.844	237.514	166.195	149.761	118.405	128.822	2095.36	11.4773	8.19699	8.76074	8.49347	13.2692	11.5896	11.3352	7.93158	7.14724	5.65079	6.14794
1250	sp|Q9BXP5|SRRT_HUMAN	SRRT	SRRT_HUMAN Serrate RNA effector molecule homolog	544	WASEPGTPPLPTS	23.6238	R	R.TQLWASEPGT#PPLPTSLPSQNPILK.N	1	1	117.85	81.0112	89.8409	111.89	120.042	109.043	149.729	130.261	105.457	100.516	135.827	1251.47	238.888	129.934	150.987	159.901	264.21	185.874	207.017	167.085	129.443	100.516	125.07	1858.92	12.8509	6.98971	8.12229	8.60178	14.2131	9.99902	11.1364	8.98826	6.96331	5.40721	6.72807
2088	sp|Q13428-4|TCOF_HUMAN	TCOF1	TCOF_HUMAN Isoform 4 of Treacle protein	583	QAKPTSSPAKGPP	17.0091	R	K.SLGNILQAKPTSS#PAK.G	1	1	115.66	102.278	104.721	90.3054	130.884	106.312	161.387	140.624	72.5118	69.007	66.5513	1160.24	234.448	164.043	175.994	129.054	288.072	181.219	223.137	180.378	89.0047	69.007	61.2805	1795.64	13.0566	9.13562	9.80121	7.18708	16.0429	10.0922	12.4266	10.0453	4.95672	3.84304	3.41274
2122	sp|Q86YV5|SG223_HUMAN	SGK223	SG223_HUMAN Tyrosine-protein kinase SgK223	411	TQPEPIYAESTKR	52.4027	U	R.EATQPEPIY#AESTK.R	2	2	114.393	99.7037	90.7032	88.4443	96.6418	90.7617	89.8237	97.5195	143.045	174.536	203.581	1289.15	231.88	159.914	152.436	126.394	212.707	154.712	124.192	125.088	175.58	174.536	187.458	1824.9	12.7065	8.76292	8.35315	6.92609	11.6558	8.47785	6.80541	6.85452	9.62138	9.56414	10.2722
1396	sp|Q8IYB3|SRRM1_HUMAN	SRRM1	SRRM1_HUMAN Serine/arginine repetitive matrix protein 1	402	RRRHRPSPPATPP	1000	R	R.HRPS#PPAT#PPPK.T	2	1	113.254	94.8382	85.2322	104.587	124.688	89.7413	125.631	132.789	86.1197	95.0395	114.678	1166.6	229.572	152.111	143.242	149.463	274.437	152.973	173.699	170.328	105.708	95.0395	105.596	1752.17	13.1022	8.68128	8.17512	8.5302	15.6627	8.73049	9.91337	9.721	6.03297	5.42411	6.02658
1169	sp|P49840|GSK3A_HUMAN	GSK3A	GSK3A_HUMAN Glycogen synthase kinase-3 alpha	282	NVSYICSRYYRAP	59.2977	R	R.GEPNVSY#ICS#R.Y	1	1	112.486	89.2588	90.8418	91.5796	156.638	126.687	134.274	82.9564	54.4506	50.2908	80.6233	1070.09	228.014	143.162	152.669	130.875	344.758	215.951	185.649	106.408	66.8355	50.2908	74.2379	1698.85	13.4217	8.42698	8.98662	7.70372	20.2936	12.7116	10.9279	6.26353	3.93416	2.96028	4.36989
1693	sp|O94979-8|SC31A_HUMAN	SEC31A	SC31A_HUMAN Isoform 8 of Protein transport protein Sec31A	799	PVAGHESPKIPYE	23.5235	R	R.AQGEPVAGHES#PKIPYEK.Q	1	1	112.329	81.5093	85.0319	83.6806	110.894	71.2004	105.593	103.624	71.0726	58.9404	79.9031	963.777	227.697	130.732	142.905	119.586	244.075	121.368	145.994	132.918	87.2381	58.9404	73.5748	1485.03	15.3328	8.80336	9.62306	8.0528	16.4357	8.17277	9.83106	8.95052	5.87451	3.96897	4.95444
1030	sp|Q00341|VIGLN_HUMAN	HDLBP	VIGLN_HUMAN Vigilin	437	LINRMDYVEINID	1000	R	R.M*DY#VEINIDHK.F	3	3	112.113	134.182	139.396	234.542	122.212	175.671	252.748	514.674	196.553	209.954	312.125	2404.17	227.258	215.215	234.269	335.181	268.987	299.447	349.453	660.172	241.259	209.954	287.404	3328.6	6.82743	6.46562	7.03808	10.0697	8.0811	8.9962	10.4985	19.8333	7.24806	6.30758	8.6344
1546	sp|Q13595|TRA2A_HUMAN	TRA2A	TRA2A_HUMAN Transformer-2 protein homolog alpha	202	ITKRAHTPTPGIY	13.3795	R	K.RAHT#PTPGIYM*GRPTHSGGGGGGGGGGGGGGGGR.R	3	2	111.289	104.413	100.55	100.973	130.768	137.314	185.843	141.756	110.314	126.351	155.136	1404.71	225.587	167.467	168.985	144.299	287.818	234.066	256.949	181.83	135.405	126.351	142.849	2071.61	10.8895	8.08391	8.15718	6.96554	13.8935	11.2988	12.4034	8.77724	6.53625	6.0992	6.89559
1474	sp|Q9Y446|PKP3_HUMAN	PKP3	PKP3_HUMAN Plakophilin-3	84	GTSRGQYHTLQAG	48.8739	R	R.GQY#HTLQAGFSSR.S	2	2	109.978	128.105	129.962	138.624	125.167	161.742	191.348	182.288	191.526	256.168	260.045	1874.95	222.93	205.467	218.415	198.105	275.49	275.705	264.561	233.82	235.089	256.168	239.45	2625.2	8.49192	7.82671	8.31993	7.54629	10.4941	10.5023	10.0777	8.90675	8.95509	9.75804	9.12121
1163	sp|Q99959|PKP2_HUMAN	PKP2	PKP2_HUMAN Plakophilin-2	626	AELPEKYSQNIYI	24.437	R	K.Y#SQNIYIQNR.N	1	1	109.42	91.0687	88.0896	93.5859	90.1069	93.1593	116.912	96.718	116.574	127.995	138.236	1161.86	221.8	146.065	148.044	133.742	198.324	158.799	161.644	124.06	143.088	127.995	127.288	1690.85	13.1177	8.63855	8.75561	7.90975	11.7292	9.39168	9.55994	7.33715	8.46253	7.56985	7.52803
2252	sp|P37108|SRP14_HUMAN	SRP14	SRP14_HUMAN Signal recognition particle 14 kDa protein	27	RTSGSVYITLKKY	30.8348	R	R.TSGSVY#ITLK.K	1	1	107.631	89.2195	98.2999	88.8501	118.254	103.441	129.085	129.287	98.3513	84.5805	91.9636	1138.96	218.172	143.099	165.204	126.974	260.275	176.325	178.475	165.836	120.721	84.5805	84.68	1724.34	12.6525	8.29874	9.58067	7.36363	15.0942	10.2257	10.3503	9.61736	7.00101	4.90509	4.91086
481	sp|Q06124|PTN11_HUMAN	PTPN11	PTN11_HUMAN Tyrosine-protein phosphatase non-receptor type 11	584	EDSARVYENVGLM	1000	R	R.VY#ENVGLM*QQQK.S	3	3	106.474	433.722	378.234	303.244	67.1848	137.352	157.652	111.508	610.53	541.991	447.026	3294.92	215.827	695.645	635.663	433.36	147.873	234.13	217.972	143.031	749.396	541.991	411.622	4426.51	4.87578	15.7154	14.3604	9.79011	3.34062	5.28928	4.92423	3.23123	16.9297	12.2442	9.29901
1886	sp|P16949-2|STMN1_HUMAN	STMN1	STMN1_HUMAN Isoform 2 of Stathmin	38	VPEFPLSPPKKKD	46.1286	R	K.ESVPEFPLS#PPK.K	2	2	106.449	83.7785	70.4667	83.2545	79.1848	63.6851	72.6452	94.1325	54.628	66.8908	101.794	876.91	215.778	134.372	118.427	118.978	174.284	108.557	100.441	120.744	67.0532	66.8908	93.7321	1319.26	16.356	10.1854	8.97679	9.01853	13.2108	8.22868	7.61342	9.1524	5.08265	5.07035	7.10492
574	sp|Q9HBL0|TENS1_HUMAN	TNS1	TENS1_HUMAN Tensin-1	366	PLDGSLYAKVKKK	22.0108	R	R.DDGM*EEVVGHTQGPLDGSLY#AK.V	3	3	106.1	62.3835	55.2395	61.9243	88.0709	90.0742	86.5881	77.6071	190.597	199.256	222.136	1239.98	215.069	100.057	92.8358	88.4949	193.843	153.54	119.718	99.5465	233.948	199.256	204.543	1700.85	12.6448	5.88274	5.4582	5.20298	11.3968	9.02726	7.03872	5.85275	13.7548	11.7151	12.0259
685	sp|P19174-2|PLCG1_HUMAN	PLCG1	PLCG1_HUMAN Isoform 2 of 1-phosphatidylinositol 4,5-bisphosphate phosphodiesterase gamma-1	977	GTERACYRDMSSF	18.8054	R	R.ACY#RDM*SSFPETK.A	1	1	104.304	74.1363	80.9054	108.753	72.5095	66.322	99.2631	129.717	53.1575	64.1406	77.6284	930.837	211.429	118.907	135.97	155.418	159.592	113.052	137.243	166.388	65.2482	64.1406	71.4803	1398.87	15.1143	8.50022	9.72002	11.1102	11.4087	8.0817	9.81099	11.8945	4.66436	4.58518	5.10987
1262	sp|P46013|KI67_HUMAN	MKI67	KI67_HUMAN Antigen KI-67	2223	TKIACRSPQPDPV	63.4188	R	K.IACRS#PQPDPVGTPTIFKPQSK.R	1	1	103.163	87.3706	119.5	165.22	89.4975	104.042	132.254	127.641	89.7931	99.909	111.322	1229.71	209.116	140.133	200.832	236.113	196.982	177.35	182.857	163.725	110.217	99.909	102.505	1819.74	11.4916	7.70073	11.0363	12.9751	10.8248	9.7459	10.0485	8.99717	6.05672	5.49029	5.63294
2373	sp|Q00536-2|CDK16_HUMAN	CDK16	CDK16_HUMAN Isoform 2 of Cyclin-dependent kinase 16	254	GTYATVYKGKSKL	30.8348	R	K.LGEGTYATVY#K.G	1	1	103.123	72.7573	63.7468	80.5203	79.6192	72.4235	93.004	86.9272	53.1286	43.1502	56.2154	804.616	209.035	116.695	107.133	115.07	175.241	123.453	128.589	111.501	65.2128	43.1502	51.7632	1246.84	16.7651	9.35924	8.59237	9.22891	14.0547	9.90123	10.3132	8.9427	5.23023	3.46075	4.15154
490	sp|Q96QZ7|MAGI1_HUMAN	MAGI1	MAGI1_HUMAN Membrane-associated guanylate kinase, WW and PDZ domain-containing protein 1	373	KIEDPVYGIYYVD	87.265	R	K.IEDPVY#GIYYVDHINR.K	2	2	102.781	74.2001	67.9082	65.2332	87.1586	75.705	79.6441	84.0544	59.9535	65.007	95.7443	857.39	208.343	119.009	114.127	93.2236	191.835	129.047	110.117	107.816	73.59	65.007	88.1614	1300.28	16.023	9.15261	8.77714	7.16953	14.7534	9.92455	8.46877	8.29181	5.65957	4.99948	6.78021
1481	sp|Q8IZ21-2|PHAR4_HUMAN	PHACTR4	PHAR4_HUMAN Isoform 2 of Phosphatase and actin regulator 4	301	TLLSKPSPPLPPK	54.7552	R	R.NSNPVIAELSQAINSGTLLSKPS#PPLPPK.R	1	1	101.228	56.8591	61.0249	60.3054	65.5378	63.5057	67.6904	49.0187	70.4122	60.6239	54.8063	711.012	205.194	91.1961	102.559	86.1814	144.247	108.252	93.5899	62.8763	86.4275	60.6239	50.4657	1091.61	18.7973	8.35426	9.39517	7.89487	13.2142	9.91667	8.57354	5.75994	7.91742	5.55361	4.62304
975	sp|P27986-4|P85A_HUMAN	PIK3R1	P85A_HUMAN Isoform 4 of Phosphatidylinositol 3-kinase regulatory subunit alpha	452	GKKLHEYNTQFQE	59.2977	R	K.LHEY#NTQFQEK.S	1	1	100.923	83.9361	83.0634	140.312	99.9112	110.769	162.799	226.939	102.402	116.681	182.207	1409.94	204.576	134.625	139.597	200.517	219.903	188.816	225.089	291.094	125.693	116.681	167.776	2014.37	10.1558	6.68322	6.93006	9.95435	10.9167	9.37348	11.1742	14.4509	6.23984	5.79245	8.32897
2583	sp|P35579|MYH9_HUMAN	MYH9	MYH9_HUMAN Myosin-9	1943	KGAGDGSDEEVDG	1000	R	K.GAGDGS#DEEVDGK.A	1	1	99.9126	69.0692	68.165	78.2261	81.2913	56.2252	95.2916	83.3561	69.58	65.3983	87.5259	854.041	202.528	110.78	114.559	111.792	178.921	95.8413	131.752	106.921	85.406	65.3983	80.5939	1284.49	15.7672	8.62442	8.91861	8.70318	13.9293	7.46143	10.2571	8.32398	6.64902	5.09138	6.27438
1896	sp|P04083|ANXA1_HUMAN	ANXA1	ANXA1_HUMAN Annexin A1	21	ENEEQEYVQTVKS	112.015	R	K.QAWFIENEEQEY#VQTVK.S	16	10	99.682	326.215	170.951	327.732	107.355	220.861	258.946	438	582.21	562.349	709.711	3804.01	202.06	523.215	287.301	468.355	236.287	376.479	358.023	561.822	714.634	562.349	653.502	4944.03	4.08695	10.5828	5.81108	9.47315	4.77925	7.61482	7.24153	11.3636	14.4545	11.3743	13.218
784	sp|Q92692|PVRL2_HUMAN	PVRL2	PVRL2_HUMAN Poliovirus receptor-related protein 2	454	EQEMPRYHELPTL	142.629	U	R.Y#HELPTLEER.S	2	2	98.5771	129.925	115.15	126.161	93.1264	110.072	116.267	103.627	145.632	213.809	194.087	1446.43	199.821	208.387	193.522	180.295	204.97	187.628	160.753	132.922	178.756	213.809	178.716	2039.58	9.79715	10.2172	9.48832	8.83982	10.0496	9.19934	7.8817	6.51716	8.76437	10.483	8.76239
2444	sp|Q92630|DYRK2_HUMAN	DYRK2	DYRK2_HUMAN Dual specificity tyrosine-phosphorylation-regulated kinase 2	382	HQRVYTYIQSRFY	24.437	R	R.VYTY#IQSR.F	1	1	97.9116	83.6733	74.8851	77.4121	84.0177	72.9182	97.7198	82.7389	74.2335	68.3849	84.3507	898.246	198.472	134.203	125.852	110.628	184.922	124.296	135.109	106.129	91.118	68.3849	77.6701	1356.78	14.6281	9.89127	9.27579	8.15372	13.6294	9.16108	9.95803	7.82211	6.71573	5.04022	5.72457
8	sp|O60716|CTND1_HUMAN	CTNND1	CTND1_HUMAN Catenin delta-1	904	KSLDNNYSTPNER	48.8739	R	K.SLDNNY#STPNER.G	2	2	97.8827	295.129	229.531	195.704	92.0485	178.065	150.772	138.56	325.526	513.245	422.337	2638.8	198.413	473.357	385.751	279.677	202.597	303.53	208.459	177.731	399.568	513.245	388.888	3531.21	5.61883	13.4049	10.924	7.92013	5.73732	8.59562	5.90333	5.03314	11.3153	14.5345	11.0129
2633	sp|Q9UGI8|TES_HUMAN	TES	TES_HUMAN Testin	251	EGDPAIYAERAGY	1000	R	K.EGDPAIY#AER.A	1	1	97.8825	66.9937	65.7906	56.8108	78.1302	60.1442	81.1706	66.876	48.4876	50.1145	60.4596	732.86	198.412	107.451	110.568	81.1873	171.963	102.522	112.228	85.7818	59.5162	50.1145	55.6712	1135.41	17.4749	9.46358	9.73812	7.15045	15.1454	9.02944	9.8843	7.5551	5.2418	4.41376	4.90316
2589	sp|P08559-4|ODPA_HUMAN	PDHA1	ODPA_HUMAN Isoform 4 of Pyruvate dehydrogenase E1 component subunit alpha, somatic form, mitochondrial	331	YRYHGHSMSDPGV	20.1669	R	R.YHGHS#MSDPGVSYR.T	1	1	97.556	79.9268	95.7779	79.1819	96.0137	98.3962	97.6514	77.2504	32.2315	49.5175	27.401	830.904	197.751	128.194	160.965	113.158	211.325	167.726	135.014	99.0889	39.5626	49.5175	25.2308	1327.53	14.8961	9.65658	12.1251	8.5239	15.9186	12.6344	10.1703	7.46414	2.98016	3.73004	1.90058
1367	sp|O75063|XYLK_HUMAN	FAM20B	XYLK_HUMAN Glycosaminoglycan xylosylkinase	138	VVEGEPYAGYDRH	53.5337	U	R.DHVVEGEPY#AGYDR.H	2	2	96.4754	79.0768	83.8718	82.4956	87.6884	101.996	131.749	108.921	68.499	63.4218	79.5277	983.722	195.56	126.831	140.956	117.893	193.001	173.861	182.158	139.713	84.0792	63.4218	73.2291	1490.7	13.1187	8.50813	9.45564	7.90856	12.947	11.663	12.2196	9.37226	5.64024	4.25449	4.91239
2800	sp|Q8IUC4|RHPN2_HUMAN	RHPN2	RHPN2_HUMAN Rhophilin-2	639	KISKKLSFLSWGT	26.1051	R	K.KLS#FLSWGTNK.N	1	1	95.7931	136.96	171.85	166.11	81.4987	158.279	223.858	135.267	148.206	147.302	147.618	1612.74	194.177	219.669	288.813	237.385	179.377	269.802	309.51	173.506	181.916	147.302	135.927	2337.38	8.30745	9.39807	12.3562	10.156	7.67428	11.5429	13.2417	7.42309	7.78287	6.30202	5.81534
1871	sp|P08621|RU17_HUMAN	SNRNP70	RU17_HUMAN U1 small nuclear ribonucleoprotein 70 kDa	126	RREFEVYGPIKRI	1000	R	R.EFEVY#GPIK.R	1	1	95.7516	75.3361	80.9487	83.0961	78.9815	83.2212	114.093	102.217	66.1994	63.7688	73.4645	917.078	194.093	120.831	136.043	118.751	173.837	141.859	157.746	131.114	81.2565	63.7688	67.6461	1386.95	13.9943	8.71204	9.80882	8.56206	12.5338	10.2281	11.3736	9.45342	5.85867	4.59779	4.87734
2723	sp|P29692-2|EF1D_HUMAN	EEF1D	EF1D_HUMAN Isoform 2 of Elongation factor 1-delta	499	PQTQHVSPMRQVE	58.5514	R	R.ATAPQTQHVS#PMR.Q	1	1	94.9553	62.2232	56.9583	71.9232	81.4529	68.2401	80.926	81.6561	54.939	60.3287	70.9765	784.579	192.479	99.7996	95.7245	102.784	179.276	116.322	111.89	104.74	67.4349	60.3287	65.3552	1196.13	16.0917	8.34351	8.00283	8.59304	14.988	9.72482	9.35427	8.75656	5.63774	5.04364	5.46387
683	sp|P19174-2|PLCG1_HUMAN	PLCG1	PLCG1_HUMAN Isoform 2 of 1-phosphatidylinositol 4,5-bisphosphate phosphodiesterase gamma-1	783	GRNPGFYVEANPM	193.276	R	R.NPGFY#VEANPMPTFK.C	3	2	94.4617	340.983	299.555	224.202	72.6069	257.235	259.172	249.011	285.857	447.636	417.06	2947.78	191.478	546.902	503.435	320.404	159.807	438.482	358.335	319.406	350.875	447.636	384.028	4020.79	4.76221	13.6018	12.5208	7.96868	3.97451	10.9054	8.91206	7.94386	8.72653	11.133	9.55107
550	sp|P42685|FRK_HUMAN	FRK	FRK_HUMAN Tyrosine-protein kinase FRK	46	SQRHGHYFVALFD	151.292	U	R.HGHY#FVALFDYQAR.T	2	1	94.3697	86.6531	59.7938	77.6117	109.446	104.951	157.467	137.224	60.4906	63.9537	87.6082	1039.57	191.292	138.983	100.49	110.913	240.889	178.898	217.716	176.017	74.2492	63.9537	80.6696	1574.07	12.1527	8.82949	6.38407	7.04628	15.3035	11.3653	13.8314	11.1823	4.71702	4.06295	5.1249
2629	sp|Q14444|CAPR1_HUMAN	CAPRIN1	CAPR1_HUMAN Caprin-1	78	KGKLDDYQERMNK	1000	R	K.LDDY#QER.M	2	2	93.9612	85.5822	102.416	382.405	95.6387	144.951	311.162	957.776	211.655	203.351	593.034	3181.93	190.464	137.265	172.121	546.489	210.499	247.083	430.217	1228.54	259.797	203.351	546.066	4171.89	4.56541	3.29024	4.12573	13.0993	5.04566	5.92257	10.3123	29.448	6.22731	4.87431	13.0892
1518	sp|Q70E73|RAPH1_HUMAN	RAPH1	RAPH1_HUMAN Ras-associated and pleckstrin homology domains-containing protein 1	856	PPPSPLSPVPSVV	23.6238	R	K.QQSFCAKPPPSPLS#PVPSVVK.Q	2	2	93.8695	124.894	191.283	200.43	62.0993	138.158	175.212	117.509	78.9521	107.258	152.27	1441.93	190.278	200.318	321.471	286.431	136.68	235.503	242.251	150.729	96.9099	107.258	140.21	2108.04	9.02631	9.50257	15.2498	13.5875	6.48373	11.1717	11.4918	7.15021	4.59716	5.08803	6.65123
1895	sp|P04083|ANXA1_HUMAN	ANXA1	ANXA1_HUMAN Annexin A1	207	SDARALYEAGERR	1000	U	R.ALY#EAGER.R	1	1	93.788	78.6939	77.8037	64.7788	92.4606	75.4454	99.0872	100.135	63.6399	50.9698	72.5901	869.393	190.113	126.217	130.757	92.5742	203.504	128.604	137	128.444	78.1148	50.9698	66.8409	1333.14	14.2605	9.46764	9.80825	6.94408	15.2651	9.64672	10.2765	9.63468	5.85947	3.8233	5.0138
1706	sp|Q9NWH9|SLTM_HUMAN	SLTM	SLTM_HUMAN SAFB-like transcription modulator	553	KRISSKSPGHMVI	114.968	R	K.S#PGHM*VILDQTK.G	3	3	93.3599	79.7622	79.2635	89.5899	81.587	82.5997	99.3998	84.8764	82.9536	86.735	82.3939	942.521	189.245	127.93	133.211	128.031	179.572	140.799	137.432	108.871	101.822	86.735	75.8683	1409.52	13.4262	9.07618	9.45083	9.08335	12.74	9.98919	9.75029	7.72398	7.22387	6.15354	5.38258
1675	sp|P28482|MK01_HUMAN	MAPK1	MK01_HUMAN Mitogen-activated protein kinase 1	187	TGFLTEYVATRWY	20.1669	R	R.VADPDHDHTGFLTEY#VATR.W	2	2	92.8795	194.699	147.538	139.545	28.2539	80.617	75.1725	135.828	369.515	428.384	419.841	2112.27	188.271	312.276	247.953	199.421	62.1864	137.42	103.935	174.227	453.562	428.384	386.589	2694.22	6.98795	11.5906	9.20312	7.40179	2.30814	5.10052	3.85769	6.46668	16.8346	15.9001	14.3488
1456	sp|Q9UQ35|SRRM2_HUMAN	SRRM2	SRRM2_HUMAN Serine/arginine repetitive matrix protein 2	1003	PKVKAQTPPGPSL	49.5899	R	K.AQT#PPGPSLSGSK.S	1	1	92.8011	75.8559	82.5239	84.2655	84.6643	94.0453	114.273	95.9795	76.589	78.3183	81.2482	960.564	188.112	121.665	138.69	120.422	186.345	160.309	157.996	123.113	94.0092	78.3183	74.8134	1443.79	13.029	8.42675	9.60596	8.34069	12.9066	11.1033	10.9431	8.52703	6.51126	5.42448	5.18172
1952	sp|Q15759|MK11_HUMAN	MAPK11	MK11_HUMAN Mitogen-activated protein kinase 11	182	DEEMTGYVATRWY	31.2747	R	R.QADEEM*TGY#VATR.W	2	2	89.3888	93.5255	66.466	69.2911	117.567	52.1923	54.6364	46.8436	163.503	169.781	166.394	1089.59	181.195	150.005	111.703	99.0226	258.763	88.9669	75.5412	60.0862	200.692	169.781	153.215	1548.97	11.6978	9.68417	7.21144	6.39279	16.7055	5.74361	4.87686	3.8791	12.9565	10.9609	9.89141
901	sp|Q9NRY4|RHG35_HUMAN	ARHGAP35	RHG35_HUMAN Rho GTPase-activating protein 35	1105	NEEENIYSVPHDS	17.0091	U	R.NEEENIY#SVPHDSTQGK.I	1	1	89.1111	76.9691	120.42	128.605	62.5208	131.17	213.763	293.001	126.388	101.585	227.39	1570.92	180.633	123.45	202.378	183.787	137.607	223.593	295.553	375.832	155.136	101.585	209.381	2188.93	8.25208	5.63975	9.2455	8.39618	6.28649	10.2147	13.5021	17.1696	7.08727	4.64084	9.56543
565	sp|P60709|ACTB_HUMAN	ACTB	ACTB_HUMAN Actin, cytoplasmic 1	218	IKEKLCYVALDFE	58.1324	R	K.LCY#VALDFEQEM*ATAASSSSLEK.S	2	2	87.0161	67.3616	68.6114	71.0232	78.1289	67.8554	87.2548	75.7263	61.5708	60.4822	74.3866	799.417	176.386	108.041	115.309	101.498	171.96	115.666	120.64	97.134	75.5751	60.4822	68.4952	1211.19	14.5631	8.92026	9.52031	8.38004	14.1977	9.54982	9.96047	8.01974	6.23976	4.99363	5.65521
2857	sp|O14493|CLD4_HUMAN	CLDN4	CLD4_HUMAN Claudin-4	208	SAAASNYVxxxxx	48.8739	U	R.SAAASNY#V.-	1	1	86.4543	93.1443	97.006	112.302	91.578	77.4746	113.12	108.241	157.938	189.095	211.371	1337.72	175.247	149.394	163.029	160.489	201.562	132.063	156.402	138.84	193.861	189.095	194.63	1854.61	9.44926	8.05525	8.79047	8.65348	10.8681	7.12079	8.43315	7.4862	10.4529	10.196	10.4944
1092	sp|P40763-2|STAT3_HUMAN	STAT3	STAT3_HUMAN Isoform Del-701 of Signal transducer and activator of transcription 3	704	DPGAAPYLKTKFI	138.763	U	K.YCRPESQEHPEADPGAAPY#LK.T	3	3	85.881	275.238	278.538	223.946	58.749	341.911	432.105	407.576	1248.55	1696.8	1186.03	6235.33	174.085	441.453	468.113	320.037	129.305	582.821	597.435	522.797	1532.53	1696.8	1092.1	7557.48	2.30348	5.84127	6.19403	4.23471	1.71096	7.71184	7.90522	6.9176	20.2783	22.452	14.4506
2522	sp|Q9UHR4|BI2L1_HUMAN	BAIAP2L1	BI2L1_HUMAN Brain-specific angiogenesis inhibitor 1-associated protein 2-like protein 1	274	NVVRKDYDTLSKC	48.8739	U	K.DY#DTLSK.C	1	1	85.6789	123.033	125.905	118.423	86.5987	118.101	149.205	121.393	172.948	194.258	182.668	1478.21	173.675	197.332	211.598	169.236	190.602	201.315	206.294	155.71	212.286	194.258	168.201	2080.51	8.34774	9.48483	10.1705	8.13434	9.16134	9.67627	9.91555	7.48424	10.2036	9.33705	8.0846
1490	sp|Q96ST3|SIN3A_HUMAN	SIN3A	SIN3A_HUMAN Paired amphipathic helix protein Sin3a	277	PYASPRSPPVQPH	34.2061	U	R.S#PPVQPHTPVTISLGTAPSLQNNQPVEFNHAINYVNK.I	2	2	83.8163	64.0514	70.3498	69.5843	83.9953	79.1504	90.3653	93.3449	55.7674	56.2085	78.8899	825.524	169.9	102.732	118.23	99.4417	184.872	134.92	124.941	119.733	68.4518	56.2085	72.6418	1252.07	13.5695	8.20494	9.44279	7.94218	14.7653	10.7757	9.97871	9.56282	5.46709	4.48924	5.80173
310	sp|Q96JQ2|CLMN_HUMAN	CLMN	CLMN_HUMAN Calmin	635	HEPHQDSGEEAEG	95.3581	U	K.HEPHQDS#GEEAEGCPSAPEETPVDK.K	1	1	83.316	67.4699	66.5511	70.9278	94.2964	82.659	112.899	93.4858	67.1041	74.6247	78.5502	891.884	168.885	108.215	111.846	101.362	207.545	140.9	156.096	119.914	82.367	74.6247	72.3291	1344.08	12.5651	8.05118	8.32137	7.54132	15.4414	10.483	11.6135	8.92162	6.12812	5.55209	5.38129
2571	sp|Q6WKZ4|RFIP1_HUMAN	RAB11FIP1	RFIP1_HUMAN Rab11 family-interacting protein 1	435	PESRRSSLLSLMT	17.0091	R	R.RSS#LLSLM*TGK.K	1	1	82.2629	44.3924	50.9289	72.4158	57.2478	70.0165	87.0116	80.0876	85.5213	77.1082	83.1558	790.149	166.751	71.2008	85.5915	103.488	126.001	119.35	120.304	102.728	104.973	77.1082	76.5698	1154.07	14.449	6.16957	7.41652	8.96727	10.918	10.3417	10.4243	8.90142	9.09595	6.68144	6.63479
1996	sp|Q06481|APLP2_HUMAN	APLP2	APLP2_HUMAN Amyloid-like protein 2	750	KMQNHGYENPTYK	58.5514	R	K.M*QNHGY#ENPTYK.Y	1	1	81.8875	66.5118	66.2067	69.0416	39.5972	48.4804	51.8541	76.678	60.0091	53.9161	76.1448	690.327	165.99	106.678	111.268	98.6662	87.1527	82.6395	71.6944	98.3548	73.6582	53.9161	70.1141	1020.13	16.2714	10.4573	10.9072	9.67191	8.54328	8.10087	7.02796	9.64139	7.22046	5.28521	6.87305
1724	sp|P15529-2|MCP_HUMAN	CD46	MCP_HUMAN Isoform B of Membrane cofactor protein	387	GAEYATYQTKSTT	30.8348	R	K.ADGGAEYATY#QTK.S	1	1	81.6893	89.7466	87.8837	144.126	91.6312	96.6046	88.2976	114.771	185.887	222.06	319.717	1522.41	165.588	143.944	147.698	205.968	201.679	164.672	122.082	147.217	228.167	222.06	294.395	2043.47	8.10328	7.0441	7.2278	10.0793	9.86943	8.05845	5.97424	7.20427	11.1657	10.8668	14.4066
943	sp|P07355-2|ANXA2_HUMAN	ANXA2	ANXA2_HUMAN Isoform 2 of Annexin A2	206	DGSVIDYELIDQD	59.2977	R	R.AEDGSVIDY#ELIDQDAR.D	6	4	80.2443	105.223	111.459	139.025	72.9789	105.342	136.365	166.599	185.107	184.77	227.047	1514.16	162.659	168.767	187.318	198.678	160.625	179.566	188.54	213.697	227.21	184.77	209.065	2080.9	7.81678	8.11032	9.00182	9.5477	7.71904	8.62927	9.06054	10.2695	10.9189	8.87935	10.0469
2032	sp|P05067|A4_HUMAN	APP	A4_HUMAN Amyloid beta A4 protein	757	KMQQNGYENPTYK	94.9501	R	K.M*QQNGY#ENPTYK.F	1	1	80.2228	80.1197	71.6966	63.9552	44.7926	55.797	66.9674	63.9157	60.7704	64.3555	71.4697	724.063	162.615	128.504	120.494	91.3973	98.5878	95.1114	92.5903	81.9845	74.5927	64.3555	65.8093	1076.04	15.1124	11.9423	11.1979	8.49384	9.16208	8.83901	8.60471	7.61908	6.93213	5.98076	6.11587
1450	sp|Q9NZH5|PTTG2_HUMAN	PTTG2	PTTG2_HUMAN Securin-2	165	FQLGPPSPVKMPS	1000	R	K.LFQLGPPS#PVK.M	1	1	78.8399	59.4202	60.926	54.6362	46.3769	45.5763	42.479	36.8005	25.2463	19.071	28.7576	498.13	159.812	95.3038	102.393	78.0796	102.075	77.6893	58.7322	47.2039	30.9886	19.071	26.48	797.828	20.0309	11.9454	12.8339	9.78652	12.7941	9.7376	7.36151	5.91655	3.88412	2.39037	3.31901
1469	sp|Q5VTE0|EF1A3_HUMAN	EEF1A1P5	EF1A3_HUMAN Putative elongation factor 1-alpha-like 3	29	TTGHLIYKCGGID	88.8188	R	K.STTTGHLIY#K.C	1	1	78.6649	58.9201	55.8819	54.3295	85.5497	69.5681	72.8472	79.2431	39.0471	56.9919	79.894	730.938	159.458	94.5017	93.9155	77.6413	188.293	118.586	100.72	101.645	47.9284	56.9919	73.5664	1113.25	14.3237	8.48884	8.43618	6.97431	16.9139	10.6522	9.04739	9.1305	4.30529	5.11943	6.60828
2345	sp|Q9UN86-2|G3BP2_HUMAN	G3BP2	G3BP2_HUMAN Isoform B of Ras GTPase-activating protein-binding protein 2	225	EELEEKSTTPPPA	13.3795	U	K.S#TTPPPAEPVSLPQEPPKPR.V	1	1	78.4668	65.0257	57.3189	68.071	78.6655	65.0966	98.1023	75.8922	51.5944	45.9849	56.2369	740.455	159.056	104.294	96.3305	97.279	173.141	110.963	135.638	97.3468	63.3297	45.9849	51.7829	1135.15	14.0119	9.18774	8.48617	8.56973	15.2528	9.77525	11.9489	8.5757	5.57898	4.05101	4.56178
1899	sp|Q6NUM9|RETST_HUMAN	RETSAT	RETST_HUMAN All-trans-retinol 13,14-reductase	486	GKRGSDYETFKNS	44.2778	R	K.RGSDY#ETFK.N	2	2	78.2992	179.79	208.791	400.324	93.4111	261.306	415.977	414.219	483.506	552.578	674.642	3762.84	158.716	288.365	350.896	572.095	205.596	445.421	575.137	531.318	593.48	552.578	621.21	4894.81	3.24254	5.89123	7.16873	11.6878	4.20029	9.09986	11.7499	10.8547	12.1247	11.2891	12.6912
1884	sp|P16949-2|STMN1_HUMAN	STMN1	STMN1_HUMAN Isoform 2 of Stathmin	16	ELEKRASGQAFEL	124.922	R	K.RAS#GQAFELILSPR.S	1	1	77.6171	60.8501	63.5091	71.9379	71.6903	74.6001	90.1758	94.0743	63.4444	56.3734	75.9767	800.249	157.334	97.5972	106.734	102.805	157.789	127.163	124.679	120.669	77.8749	56.3734	69.9593	1198.98	13.1223	8.14004	8.90207	8.57441	13.1603	10.606	10.3987	10.0643	6.49511	4.70179	5.83492
1065	sp|O60547|GMDS_HUMAN	GMDS	GMDS_HUMAN GDP-mannose 4,6 dehydratase	327	LKYYRPTEVDFLQ	23.6238	R	K.YYRPT#EVDFLQGDCTK.A	1	1	77.5441	67.6613	71.7951	75.9124	65.8516	71.2863	74.9066	68.6812	49.0171	49.6773	68.7859	741.119	157.186	108.522	120.659	108.485	144.938	121.514	103.567	88.0972	60.1661	49.6773	63.338	1126.15	13.9578	9.63652	10.7143	9.63327	12.8702	10.7903	9.19656	7.82287	5.34264	4.41125	5.6243
525	sp|Q13480-2|GAB1_HUMAN	GAB1	GAB1_HUMAN Isoform 2 of GRB2-associated-binding protein 1	689	ADERVDYVVVDQQ	1000	R	R.VDY#VVVDQQK.T	4	4	77.3399	956.672	893.652	796.827	27.6833	215.828	169.311	159.263	961.745	1287.25	1066.48	6612.05	156.772	1534.4	1501.88	1138.73	60.9305	367.899	234.092	204.286	1180.5	1287.25	982.012	8648.74	1.81265	17.7413	17.3653	13.1664	0.704501	4.25379	2.70666	2.36203	13.6493	14.8836	11.3544
314	sp|Q09666|AHNK_HUMAN	AHNAK	AHNK_HUMAN Neuroblast differentiation-associated protein AHNAK	715	TKVKGEYDVTVPK	57.7111	U	K.VKGEY#DVTVPK.L	5	5	76.7578	976.764	625.82	808.526	95.6743	793.174	723.814	669.609	1814.35	2615.09	1942.42	11142	155.592	1566.63	1051.76	1155.45	210.577	1352.04	1000.76	858.906	2227.02	2615.09	1788.58	13982.4	1.11277	11.2043	7.52201	8.2636	1.50602	9.66959	7.15726	6.14276	15.9273	18.7027	12.7917
2249	sp|Q9H307|PININ_HUMAN	PNN	PININ_HUMAN Pinin	66	LLRRGFSDSGGGP	44.2778	R	R.RGFS#DSGGGPPAK.Q	1	1	76.4279	108.66	142.444	159.159	71.7702	108.934	179.394	111.135	239.1	272.138	226.225	1695.39	154.923	174.279	239.393	227.451	157.965	185.689	248.033	142.553	293.484	272.138	208.308	2304.21	6.72346	7.56349	10.3893	9.87107	6.85548	8.05866	10.7643	6.18662	12.7368	11.8104	9.04029
276	sp|P68363|TBA1B_HUMAN	TUBA1B	TBA1B_HUMAN Tubulin alpha-1B chain	272	HFPLATYAPVISA	30.8348	R	R.IHFPLATY#APVISAEK.A	1	1	75.616	131.021	108.696	79.7692	68.2045	66.1092	50.9881	39.0943	20.2718	26.4947	50.5492	716.814	153.277	210.145	182.674	113.997	150.117	112.69	70.497	50.1462	24.8826	26.4947	46.5457	1141.47	13.4281	18.4101	16.0035	9.98687	13.1512	9.87236	6.17601	4.39314	2.17988	2.32112	4.07771
2012	sp|Q9H4G0|E41L1_HUMAN	EPB41L1	E41L1_HUMAN Band 4.1-like protein 1	343	KIRPGEYEQFEST	26.1051	R	K.IRPGEY#EQFESTIGFK.L	1	1	75.1142	48.9555	48.2763	59.8841	56.3509	54.0487	69.4349	66.0717	107.09	114.086	146.287	845.6	152.26	78.5196	81.1335	85.5793	124.027	92.1312	96.0019	84.75	131.448	114.086	134.701	1174.64	12.9623	6.68457	6.9071	7.28559	10.5588	7.84337	8.17289	7.21499	11.1905	9.71243	11.4675
1734	sp|P78369|CLD10_HUMAN	CLDN10	CLD10_HUMAN Claudin-10	207	MSSRTKYHGGEDF	1000	R	K.Y#HGGEDFK.T	2	2	74.9223	83.5705	78.8254	371.466	72.757	107.584	131.279	306.989	177.493	194.789	485.172	2084.85	151.871	134.038	132.475	530.855	160.137	183.388	181.509	393.774	217.864	194.789	446.747	2727.45	5.56825	4.91443	4.85709	19.4634	5.87131	6.72381	6.6549	14.4375	7.98785	7.1418	16.3797
2509	sp|Q12888-2|TP53B_HUMAN	TP53BP1	TP53B_HUMAN Isoform 2 of Tumor suppressor p53-binding protein 1	1099	QPMKPISPVKDPV	56.9157	R	R.QSQQPM*KPIS#PVK.D	1	1	74.3873	50.5967	70.4839	72.785	62.9952	63.1876	78.1608	67.7257	66.3667	54.4638	68.4556	729.608	150.786	81.1518	118.456	104.016	138.651	107.709	108.066	86.8717	81.4619	54.4638	63.0339	1094.67	13.7746	7.41337	10.8212	9.50203	12.6661	9.83946	9.87208	7.93589	7.4417	4.97537	5.75827
1997	sp|Q06481|APLP2_HUMAN	APLP2	APLP2_HUMAN Amyloid-like protein 2	755	GYENPTYKYLEQM	17.0091	R	K.M*QNHGYENPTY#K.Y	1	1	73.5583	68.1272	60.9865	58.6361	47.6682	47.9096	60.7793	49.554	39.2671	46.0826	43.3233	595.892	149.106	109.269	102.494	83.7958	104.917	81.6666	84.0344	63.5628	48.1985	46.0826	39.8921	913.019	16.3311	11.9679	11.2259	9.17788	11.4912	8.94468	9.20401	6.96182	5.27902	5.04728	4.36925
1261	sp|P46013|KI67_HUMAN	MKI67	KI67_HUMAN Antigen KI-67	357	YSQQQNSPQKHKN	84.3587	U	K.TPVQYSQQQNS#PQK.H	1	1	73.27	56.4347	56.0032	60.3531	62.9143	52.027	72.9841	76.0449	46.5035	44.7284	43.8717	645.135	148.522	90.5153	94.1194	86.2496	138.473	88.6851	100.909	97.5427	57.0808	44.7284	40.397	987.223	15.0444	9.16868	9.53376	8.73659	14.0266	8.9833	10.2215	9.88052	5.78196	4.53073	4.09199
2613	sp|O60784-2|TOM1_HUMAN	TOM1	TOM1_HUMAN Isoform 2 of Target of Myb protein 1	386	QRKEVKYEAPQAT	42.8692	R	K.Y#EAPQATDGLAGALDAR.Q	1	1	71.9338	47.685	50.5633	56.2665	60.6239	50.6929	63.0003	63.2843	47.6355	52.3972	71.7473	635.83	145.813	76.4818	84.977	80.4095	133.432	86.411	87.1053	81.1747	58.4703	52.3972	66.0649	952.737	15.3047	8.02759	8.91925	8.43984	14.0051	9.06976	9.14263	8.52016	6.13708	5.49965	6.93422
394	sp|Q8N4X5-4|AF1L2_HUMAN	AFAP1L2	AF1L2_HUMAN Isoform 4 of Actin filament-associated protein 1-like 2	411	DNHLHFYQDRNRS	1000	R	R.DNHLHFY#QDR.N	1	1	71.87	55.424	55.6563	61.3551	52.6101	50.9827	51.2889	44.7984	72.8306	62.04	64.9015	643.758	145.684	88.8942	93.5364	87.6815	115.794	86.905	70.9129	57.4629	89.396	62.04	59.7613	958.068	15.206	9.27849	9.76302	9.1519	12.0862	9.07085	7.40166	5.99779	9.33086	6.47554	6.23769
1457	sp|Q9UQ35|SRRM2_HUMAN	SRRM2	SRRM2_HUMAN Serine/arginine repetitive matrix protein 2	1083	RQSHSESPSLQSK	20.1669	R	R.QSHSES#PSLQSK.S	1	1	71.577	58.6994	55.2222	55.0144	68.4005	72.7209	89.6063	77.6139	54.104	67.2362	58.6149	728.81	145.09	94.1477	92.8068	78.6201	150.548	123.96	123.891	99.5552	66.41	67.2362	53.9726	1096.24	13.2353	8.58825	8.46594	7.17181	13.7332	11.3078	11.3015	9.08153	6.05799	6.13336	4.92344
2428	sp|P11413-2|G6PD_HUMAN	G6PD	G6PD_HUMAN Isoform Long of Glucose-6-phosphate 1-dehydrogenase	549	KRVGFQYEGTYKW	24.2431	R	R.VGFQY#EGTYK.W	1	1	71.1891	62.563	53.0026	54.041	62.8811	51.7795	77.7854	83.0933	52.9748	59.4836	88.1414	716.935	144.304	100.344	89.0765	77.229	138.4	88.2633	107.547	106.584	65.024	59.4836	81.1606	1057.42	13.6468	9.48959	8.42397	7.30356	13.0885	8.34707	10.1708	10.0796	6.14933	5.62538	7.67537
2852	sp|P61313|RL15_HUMAN	RPL15	RL15_HUMAN 60S ribosomal protein L15	59	YKAKQGYVIYRIR	53.5337	R	K.QGY#VIYR.I	1	1	70.8785	59.1501	61.1281	66.3823	63.3451	66.919	82.8349	61.9299	59.4589	52.1539	64.9286	709.109	143.674	94.8705	102.732	94.8657	139.422	114.07	114.529	79.4373	72.9829	52.1539	59.7862	1068.52	13.446	8.87866	9.61441	8.87821	13.0481	10.6755	10.7184	7.43431	6.83026	4.88093	5.59522
681	sp|O96013|PAK4_HUMAN	PAK4	PAK4_HUMAN Serine/threonine-protein kinase PAK 4	181	RDKRPLSGPDVGT	42.8692	U	K.RPLS#GPDVGTPQPAGLASGAK.L	1	1	70.5038	66.3759	65.3587	73.4547	61.7715	69.5167	86.4326	77.4685	67.7145	63.4925	80.1877	782.277	142.915	106.46	109.842	104.973	135.958	118.498	119.503	99.3688	83.1162	63.4925	73.8369	1157.96	12.3419	9.19373	9.48581	9.0653	11.7411	10.2333	10.3201	8.58134	7.1778	5.48312	6.37644
2212	sp|Q9UPZ9|ICK_HUMAN	ICK	ICK_HUMAN Serine/threonine-protein kinase ICK	159	KPPYTDYVSTRWY	17.0091	R	R.SKPPYTDY#VSTR.W	1	1	69.6493	67.1435	49.5643	55.2941	49.0271	33.3433	73.5656	109.623	41.8479	55.8602	78.546	683.465	141.182	107.691	83.2981	79.0199	107.908	56.8369	101.713	140.614	51.3663	55.8602	72.3252	997.815	14.1492	10.7927	8.34805	7.91929	10.8144	5.69614	10.1936	14.0922	5.14788	5.59826	7.24836
2153	sp|Q05519|SRS11_HUMAN	SRSF11	SRS11_HUMAN Serine/arginine-rich splicing factor 11	207	VAAGLVSPSLKSD	20.1669	R	K.LNHVAAGLVS#PSLK.S	1	1	68.906	61.5803	106.337	185.308	57.1748	73.295	139.709	124.683	115.567	133.278	202.993	1268.83	139.676	98.7683	178.71	264.821	125.841	124.939	193.164	159.93	141.853	133.278	186.916	1747.9	7.99108	5.6507	10.2243	15.1508	7.19956	7.14794	11.0512	9.14988	8.11564	7.62506	10.6938
2536	sp|Q08345-5|DDR1_HUMAN	DDR1	DDR1_HUMAN Isoform 4 of Epithelial discoidin domain-containing receptor 1	798	GMSRNLYAGDYYR	44.2778	R	R.NLY#AGDYYR.V	2	2	68.6713	82.7108	84.7873	89.9294	65.7629	88.659	93.0334	77.0974	114.058	119.642	143.558	1027.91	139.2	132.659	142.494	128.516	144.743	151.128	128.629	98.8928	140.001	119.642	132.189	1458.1	9.5467	9.09813	9.77262	8.814	9.92685	10.3648	8.82175	6.78232	9.60165	8.20538	9.06585
2498	sp|Q92841|DDX17_HUMAN	DDX17	DDX17_HUMAN Probable ATP-dependent RNA helicase DDX17	279	LKSTCIYGGAPKG	73.3109	R	K.STCIY#GGAPK.G	1	1	68.1399	85.5471	64.1502	63.0817	70.3758	64.282	95.1235	83.5312	64.4836	70.8155	70.4763	800.007	138.123	137.209	107.811	90.1489	154.896	109.575	131.519	107.145	79.1505	70.8155	64.8945	1191.29	11.5944	11.5177	9.04998	7.56735	13.0024	9.19803	11.0401	8.99408	6.64412	5.94445	5.44743
1752	sp|P37802|TAGL2_HUMAN	TAGLN2	TAGL2_HUMAN Transgelin-2	192	QAGMTGYGMPRQI	44.2778	R	R.GASQAGM*TGY#GM*PR.Q	3	2	67.9936	57.2383	58.9786	68.9361	58.4542	51.7074	77.2344	55.4907	66.7403	71.1316	76.4269	710.332	137.826	91.8042	99.1199	98.5154	128.657	88.1403	106.786	71.1778	81.9204	71.1316	70.3739	1045.45	13.1834	8.78129	9.48106	9.42323	12.3063	8.43083	10.2143	6.80833	7.83588	6.80391	6.73143
329	sp|Q8NFJ5|RAI3_HUMAN	GPRC5A	RAI3_HUMAN Retinoic acid-induced protein 3	347	HAWPSPYKDYEVK	31.2747	U	R.AHAWPSPY#K.D	2	1	67.3578	62.821	73.8003	84.1177	61.3868	64.5948	79.369	81.6307	73.5005	97.3573	94.9931	840.929	136.537	100.758	124.029	120.211	135.111	110.108	109.737	104.708	90.2182	97.3573	87.4697	1216.25	11.2261	8.28437	10.1977	9.88379	11.1089	9.05311	9.0226	8.60908	7.41777	8.00474	7.19178
2601	sp|Q01518|CAP1_HUMAN	CAP1	CAP1_HUMAN Adenylyl cyclase-associated protein 1	419	TDGCHAYLSKNSL	20.1669	R	K.TDGCHAY#LSK.N	1	1	66.5137	61.273	58.9118	57.4775	61.4437	56.8777	72.279	64.7074	44.9233	46.1843	64.8539	655.445	134.826	98.2755	99.0076	82.14	135.236	96.9535	99.9342	83	55.1411	46.1843	59.7175	990.417	13.6131	9.92264	9.99657	8.29348	13.6545	9.78917	10.0901	8.38031	5.56747	4.66312	6.02953
1807	sp|P05141|ADT2_HUMAN	SLC25A5	ADT2_HUMAN ADP/ATP translocase 2	191	IIYRAAYFGIYDT	44.2778	U	R.AAY#FGIYDTAK.G	2	1	66.3447	63.3552	62.3124	67.961	71.2406	85.7047	91.5957	80.9636	63.081	69.325	73.2551	795.139	134.484	101.615	104.723	97.1219	156.799	146.092	126.642	103.852	77.4288	69.325	67.4533	1185.54	11.3437	8.57124	8.83336	8.19224	13.226	12.3229	10.6822	8.75991	6.53112	5.84757	5.68969
278	sp|P68363|TBA1B_HUMAN	TUBA1B	TBA1B_HUMAN Tubulin alpha-1B chain	357	FKVGINYQPPTVV	27.1205	R	K.VGINY#QPPTVVPGGDLAK.V	1	1	65.2217	112.346	82.586	94.8645	59.4182	77.8356	65.3651	60.9932	45.0801	49.686	67.5902	780.987	132.207	180.192	138.795	135.569	130.778	132.678	90.3749	78.2358	55.3336	49.686	62.2371	1186.09	11.1465	15.1921	11.7019	11.43	11.026	11.1862	7.61959	6.59613	4.66523	4.18907	5.24726
695	sp|P07900-2|HS90A_HUMAN	HSP90AA1	HS90A_HUMAN Isoform 2 of Heat shock protein HSP 90-alpha	406	KKIKEKYIDQEEL	1000	R	K.Y#IDQEELNK.T	2	2	63.7651	115.735	117.164	160.169	49.5074	112.028	146.716	157.991	197.067	218.042	332.502	1670.69	129.255	185.626	196.906	228.894	108.965	190.962	202.853	202.655	241.89	218.042	306.168	2212.22	5.84278	8.39096	8.90085	10.3468	4.9256	8.63215	9.16966	9.16073	10.9343	9.85627	13.8399
1085	sp|Q99569|PKP4_HUMAN	PKP4	PKP4_HUMAN Plakophilin-4	478	LNTTATYAEPYRP	27.1205	R	R.NNYALNTTATY#AEPYRPIQYR.V	1	1	63.3607	40.9242	51.9419	48.7482	51.7797	53.1585	57.3417	45.2138	41.7105	47.5704	50.5125	552.262	128.435	65.6381	87.294	69.6652	113.966	90.6138	79.2817	57.9957	51.1977	47.5704	46.5119	838.17	15.3233	7.83113	10.4148	8.31158	13.597	10.8109	9.4589	6.91933	6.10827	5.67551	5.54923
2840	sp|Q15052|ARHG6_HUMAN	ARHGEF6	ARHG6_HUMAN Rho guanine nucleotide exchange factor 6	188	CKGDIIYVTRVEE	30.8348	R	K.GDIIY#VTR.V	1	1	63.345	47.6236	53.8929	60.809	64.1708	60.9938	76.4317	79.9966	56.5682	53.2249	82.7391	699.796	128.403	76.3832	90.5729	86.9011	141.239	103.97	105.676	102.612	69.4347	53.2249	76.1862	1034.6	12.4109	7.38286	8.75437	8.39947	13.6515	10.0493	10.2141	9.91797	6.71125	5.14448	7.36381
2543	sp|P50552|VASP_HUMAN	VASP	VASP_HUMAN Vasodilator-stimulated phosphoprotein	39	FSRVQIYHNPTAN	75.7382	R	R.VQIY#HNPTANSFR.V	1	1	63.2702	50.8499	52.1933	62.8186	59.5996	54.8795	80.333	80.8641	49.7007	43.0326	65.9091	663.451	128.252	81.558	87.7165	89.773	131.178	93.5475	111.07	103.724	61.0052	43.0326	60.6891	991.545	12.9345	8.22534	8.84644	9.05385	13.2296	9.43451	11.2017	10.4609	6.15254	4.33996	6.12066
604	sp|Q9UHD8|SEPT9_HUMAN	2017-09-09	SEPT9_HUMAN Septin-9	278	APVDFGYVGIDSI	142.629	R	K.APVDFGY#VGIDSILEQMR.R	4	2	63.1865	34.6598	43.9673	58.2583	33.9991	43.8268	63.8088	123.126	52.2339	47.6491	95.7122	660.428	128.082	55.5907	73.8918	83.2559	74.8314	74.707	88.2231	157.934	64.1146	47.6491	88.1318	936.411	13.678	5.93657	7.89096	8.89096	7.9913	7.97801	9.42141	16.8658	6.84684	5.08848	9.41166
1316	sp|Q86X29|LSR_HUMAN	LSR	LSR_HUMAN Lipolysis-stimulated lipoprotein receptor	551	RSRDPHYDDFRSR	84.3587	R	R.SRDPHY#DDFR.S	2	1	62.7933	114.23	118.036	116.028	52.5616	103.737	110.144	126.766	200.219	354.635	249.234	1608.38	127.285	183.214	198.372	165.814	115.687	176.829	152.286	162.602	245.759	354.635	229.495	2111.98	6.02681	8.67499	9.3927	7.85111	5.47767	8.37268	7.2106	7.69904	11.6364	16.7916	10.8664
1690	sp|P46783|RS10_HUMAN	RPS10	RS10_HUMAN 40S ribosomal protein S10	12	KNRIAIYELLFKE	1000	R	R.IAIY#ELLFK.E	2	2	62.5306	75.1275	72.2173	61.2565	57.4765	59.3668	68.1949	64.6434	59.8095	69.4296	75.3928	725.446	126.753	120.497	121.369	87.5406	126.505	101.196	94.2875	82.918	73.4133	69.4296	69.4217	1073.33	11.8093	11.2264	11.3077	8.15598	11.7862	9.42827	8.78457	7.7253	6.83977	6.46862	6.46788
817	sp|Q8IX03-2|KIBRA_HUMAN	WWC1	KIBRA_HUMAN Isoform 2 of Protein KIBRA	128	ELAQQEYQQLHAV	1000	R	R.LELAQQEY#QQLHAVWEHK.L	3	2	62.5272	40.8191	42.0939	51.693	59.2361	40.8649	57.992	52.1067	51.9106	56.1185	79.6672	595.029	126.746	65.4696	70.7434	73.8736	130.378	69.6582	80.1808	66.8372	63.7177	56.1185	73.3576	877.08	14.4509	7.46449	8.06579	8.42267	14.865	7.94206	9.14179	7.62042	7.26475	6.39834	8.36384
2051	sp|P61158|ARP3_HUMAN	ACTR3	ARP3_HUMAN Actin-related protein 3	16	VDCGTGYTKLGYA	17.0091	R	R.LPACVVDCGTGY#TK.L	1	1	62.2644	50.0508	47.7844	62.0263	56.7559	61.5214	76.0469	58.3127	54.3303	46.7765	49.5724	625.442	126.213	80.2763	80.3068	88.6407	124.919	104.869	105.144	74.7975	66.6877	46.7765	45.6463	944.277	13.3661	8.50136	8.50459	9.38715	13.229	11.1058	11.1348	7.92115	7.06231	4.95368	4.834
665	sp|P23528|COF1_HUMAN	CFL1	COF1_HUMAN Cofilin-1	68	QTVDDPYATFVKM	44.2778	R	K.EILVGDVGQTVDDPY#ATFVK.M	1	1	61.8894	78.6041	82.1561	27.7932	34.4182	17.5087	19.7598	23.552	25.1956	48.3408	59.5232	478.741	125.453	126.073	138.072	39.7188	75.7538	29.8453	27.3202	30.2101	30.9264	48.3408	54.809	726.522	17.2676	17.3529	19.0045	5.46698	10.4269	4.10797	3.76041	4.15818	4.25678	6.65373	7.54402
2327	sp|Q04837|SSBP_HUMAN	SSBP1	SSBP_HUMAN Single-stranded DNA-binding protein, mitochondrial	99	GLRDVAYQYVKKG	17.0091	R	R.DVAY#QYVK.K	1	1	61.8275	51.4804	58.8121	60.5199	67.4176	70.5833	94.3726	77.8535	71.1084	72.2299	76.0395	762.245	125.327	82.5691	98.84	86.4879	148.385	120.316	130.481	99.8626	87.2821	72.2299	70.0172	1121.8	11.172	7.36042	8.81086	7.70975	13.2274	10.7253	11.6314	8.90201	7.78055	6.43876	6.24151
1302	sp|P13929|ENOB_HUMAN	ENO3	ENOB_HUMAN Beta-enolase	44	GASTGIYEALELR	71.7529	R	R.AAVPSGASTGIY#EALELR.D	1	1	61.4851	151.108	72.246	147.519	69.3984	102.748	110.006	127.781	269.151	251.686	305.604	1668.73	124.633	242.361	121.417	210.817	152.745	175.143	152.095	163.905	330.369	251.686	281.4	2206.57	5.64827	10.9836	5.50252	9.55407	6.92226	7.93735	6.89284	7.42802	14.9721	11.4062	12.7528
1149	sp|P27361|MK03_HUMAN	MAPK3	MK03_HUMAN Mitogen-activated protein kinase 3	204	TGFLTEYVATRWY	31.2747	R	R.IADPEHDHTGFLTEY#VATR.W	2	1	61.048	184.076	155.046	102.865	10.6507	68.5447	65.3964	89.0332	195.228	235.893	240.928	1408.71	123.747	295.239	260.572	147.002	23.4419	116.841	90.4182	114.203	239.633	235.893	221.847	1868.84	6.62162	15.798	13.943	7.86597	1.25436	6.25207	4.83821	6.1109	12.8226	12.6225	11.8708
1626	sp|P07947|YES_HUMAN	YES1	YES_HUMAN Tyrosine-protein kinase Yes	446	APEAALYGRFTIK	127.526	R	K.WTAPEAALY#GR.F	1	1	60.9406	44.4476	48.7464	43.6951	55.9103	54.5109	65.0212	57.5787	48.2165	50.8134	51.7677	581.648	123.529	71.2893	81.9236	62.4439	123.058	92.9191	89.8994	73.8561	59.1834	50.8134	47.6677	876.583	14.0922	8.13264	9.34579	7.12356	14.0383	10.6002	10.2557	8.42546	6.7516	5.79676	5.4379
1069	sp|Q7KZF4|SND1_HUMAN	SND1	SND1_HUMAN Staphylococcal nuclease domain-containing protein 1	908	DADEFGYSRxxxx	24.437	U	R.ADDADEFGY#SR.-	1	1	60.9327	210.451	181.259	223.613	56.1165	172.004	140.347	162.991	191.777	350.425	383.374	2133.29	123.514	337.541	304.625	319.562	123.512	293.198	194.047	209.068	235.396	350.425	353.011	2843.9	4.34311	11.8689	10.7115	11.2368	4.34304	10.3097	6.82327	7.35147	8.27724	12.322	12.4129
2332	sp|P51610-4|HCFC1_HUMAN	HCFC1	HCFC1_HUMAN Isoform 4 of Host cell factor 1	666	TITLVKSPISVPG	16.062	R	K.S#PISVPGGSALISNLGK.V	1	1	60.8217	42.0962	47.2745	74.4984	50.1599	41.7519	53.7222	91.0739	62.8087	80.0112	132.405	736.623	123.289	67.5178	79.4498	106.464	110.401	71.1702	74.2772	116.82	77.0946	80.0112	121.918	1028.41	11.9882	6.56524	7.72548	10.3523	10.7351	6.92039	7.22251	11.3593	7.49647	7.78006	11.855
1372	sp|P15880|RS2_HUMAN	RPS2	RS2_HUMAN 40S ribosomal protein S2	133	FVAIGDYNGHVGL	1000	R	K.AFVAIGDY#NGHVGLGVK.C	1	1	60.2771	41.7855	43.5263	49.9449	58.3148	56.7306	74.5527	59.6366	43.9545	44.0786	55.5652	588.367	122.185	67.0195	73.1507	71.3754	128.35	96.7029	103.078	76.4958	53.952	44.0786	51.1644	887.552	13.7665	7.55106	8.24185	8.04183	14.4611	10.8955	11.6137	8.61874	6.07874	4.96631	5.76467
643	sp|P21333|FLNA_HUMAN	FLNA	FLNA_HUMAN Filamin-A	2379	GALEECYVTEIDQ	31.2747	R	K.VHSPSGALEECY#VTEIDQDK.Y	2	2	60.1344	52.5187	41.8756	54.4165	66.2679	53.1173	70.3519	60.4647	43.6285	55.3251	73.1234	631.224	121.895	84.2345	70.3765	77.7656	145.855	90.5436	97.2697	77.558	53.5518	55.3251	67.332	941.707	12.9441	8.94488	7.47329	8.25794	15.4883	9.61484	10.3291	8.23589	5.68668	5.87499	7.15
1944	sp|P62158|CALM_HUMAN	CALM1	CALM_HUMAN Calmodulin	100	DKDGNGYISAAEL	76.7327	R	K.DGNGY#ISAAELR.H	2	2	59.7622	60.1599	56.1956	77.8984	44.6267	66.813	88.8049	75.4516	60.7564	57.5748	77.9752	726.019	121.141	96.4902	94.4426	111.323	98.2226	113.889	122.783	96.7816	74.5755	57.5748	71.7996	1059.02	11.4389	9.11125	8.9179	10.5119	9.27483	10.7542	11.594	9.13876	7.04192	5.43659	6.77979
4	sp|O60716|CTND1_HUMAN	CTNND1	CTND1_HUMAN Catenin delta-1	257	PSRQDVYGPQPQV	1000	R	R.QDVY#GPQPQVR.V	1	1	59.2916	74.0291	81.9857	73.3139	45.9392	53.9892	52.5959	46.5677	135.689	222.247	186.574	1032.22	120.187	118.735	137.786	104.772	101.111	92.0299	72.72	59.7323	166.551	222.247	171.798	1367.67	8.78772	8.68156	10.0745	7.6606	7.39297	6.72896	5.31708	4.36745	12.1777	16.2501	12.5614
2814	sp|P00558|PGK1_HUMAN	PGK1	PGK1_HUMAN Phosphoglycerate kinase 1	203	FAKALESPERPFL	1000	R	K.ALES#PERPFLAILGGAK.V	1	1	59.2576	46.5535	40.4608	40.8497	53.4329	38.5753	41.8836	31.9525	20.2131	20.8772	31.1264	425.183	120.118	74.6669	67.9987	58.3775	117.605	65.7554	57.9089	40.9854	24.8106	20.8772	28.6612	677.765	17.7227	11.0166	10.0328	8.61324	17.3519	9.7018	8.5441	6.04714	3.66065	3.08031	4.22878
2020	sp|Q7Z2W4|ZCCHV_HUMAN	ZC3HAV1	ZCCHV_HUMAN Zinc finger CCCH-type antiviral protein 1	77	RVCRRKYCQRPCD	1000	R	K.Y#CQRPCDNLHLCK.L	2	2	58.9523	110.642	127.194	360.629	71.8169	166.299	289.487	493.024	207.705	242.673	437.955	2566.38	119.499	177.458	213.764	515.368	158.068	283.472	400.249	632.401	254.948	242.673	403.269	3401.17	3.51347	5.21757	6.28501	15.1527	4.64745	8.33454	11.768	18.5936	7.4959	7.13498	11.8568
2266	sp|P54760|EPHB4_HUMAN	EPHB4	EPHB4_HUMAN Ephrin type-B receptor 4	581	SDKHGQYLIGHGT	97.6019	R	K.HGQY#LIGHGTK.V	1	1	58.7144	56.3251	50.0631	56.6223	56.8697	57.709	77.257	47.4764	56.9675	61.7542	72.0949	651.854	119.017	90.3396	84.1364	80.918	125.169	98.3706	106.817	60.8979	69.9249	61.7542	66.3849	963.729	12.3496	9.37396	8.73029	8.39634	12.988	10.2073	11.0837	6.31898	7.25566	6.40784	6.88834
2058	sp|Q05397-5|FAK1_HUMAN	PTK2	FAK1_HUMAN Isoform 5 of Focal adhesion kinase 1	938	RSNDKVYENVTGL	20.1669	R	K.VY#ENVTGLVK.A	2	2	58.2261	61.1942	73.0977	59.1428	61.9778	51.612	79.7023	58.4336	66.3624	74.3746	78.1075	722.231	118.027	98.1491	122.848	84.5199	136.412	87.9776	110.198	74.9527	81.4566	74.3746	71.9214	1060.84	11.1258	9.25204	11.5803	7.96728	12.8589	8.29323	10.3878	7.06543	7.67852	7.01094	6.77968
330	sp|Q8NFJ5|RAI3_HUMAN	GPRC5A	RAI3_HUMAN Retinoic acid-induced protein 3	317	ETGDTLYAPYSTH	14.0618	U	R.AYSQEEITQGFEETGDTLY#APYSTHFQLQNQPPQK.E	1	1	58.0358	36.4878	27.4007	29.7553	45.5005	44.491	43.3931	48.235	18.6827	34.6831	33.2584	419.923	117.641	58.5226	46.0498	42.5228	100.146	75.8392	59.9961	61.8709	22.9321	34.6831	30.6243	650.828	18.0757	8.99203	7.07558	6.53364	15.3874	11.6527	9.21842	9.50649	3.52353	5.32907	4.70544
904	sp|P40763|STAT3_HUMAN	STAT3	STAT3_HUMAN Signal transducer and activator of transcription 3	705	PGSAAPYLKTKFI	33.6572	R	K.YCRPESQEHPEADPGSAAPY#LK.T	2	2	57.2907	234.543	230.758	177.02	67.9978	312.315	373.202	363.195	1046.45	1499.64	976.244	5338.65	116.131	376.183	387.813	252.977	149.662	532.371	515.995	465.869	1284.46	1499.64	898.926	6480.03	1.79214	5.80527	5.98475	3.90395	2.30959	8.21556	7.96286	7.18931	19.8219	23.1424	13.8722
1858	sp|Q92569|P55G_HUMAN	PIK3R3	P55G_HUMAN Phosphatidylinositol 3-kinase regulatory subunit gamma	184	GKKLQEYHSQYQE	31.2747	R	K.LQEY#HSQYQEK.S	1	1	56.6023	45.677	47.3396	108.551	50.1369	79.4537	128.24	180.625	98.099	99.5629	146.537	1040.82	114.735	73.2611	79.5593	155.128	110.35	135.437	177.307	231.687	120.412	99.5629	134.931	1432.37	8.01018	5.11468	5.55438	10.8301	7.70405	9.45542	12.3785	16.1751	8.40647	6.95092	9.42013
946	sp|P07355-2|ANXA2_HUMAN	ANXA2	ANXA2_HUMAN Isoform 2 of Annexin A2	48	YGSVKAYTNFDAE	24.437	R	K.AY#TNFDAER.D	2	2	55.9246	213.672	247.453	543.255	57.2112	338.544	647.942	832.568	515.389	523.084	915.922	4890.96	113.362	342.708	415.872	776.356	125.921	577.081	895.856	1067.93	632.615	523.084	843.381	6314.17	1.79536	5.4276	6.58633	12.2955	1.99426	9.13946	14.188	16.9133	10.019	8.28429	13.357
2570	sp|O60841|IF2P_HUMAN	EIF5B	IF2P_HUMAN Eukaryotic translation initiation factor 5B	214	PGPNIESGNEDDD	28.6965	U	K.NKPGPNIES#GNEDDDASFK.I	1	1	55.9063	36.1124	24.9252	41.9455	44.5056	40.9409	43.5036	41.1519	40.6414	40.4874	43.9919	454.112	113.325	57.9205	41.8894	59.9435	97.956	69.7878	60.1488	52.7855	49.8853	40.4874	40.5078	684.637	16.5525	8.46004	6.11849	8.75552	14.3077	10.1934	8.78551	7.71	7.28639	5.91371	5.91668
542	sp|P22626|ROA2_HUMAN	HNRNPA2B1	ROA2_HUMAN Heterogeneous nuclear ribonucleoproteins A2/B1	259	GGNFGGSPGYGGG	44.2778	R	R.GFGDGYNGYGGGPGGGNFGGS#PGYGGGR.G	1	1	55.3621	46.3576	47.3351	58.0306	50.242	48.265	69.6528	53.0382	51.4562	49.8021	61.9337	591.475	112.222	74.3527	79.5517	82.9304	110.582	82.2723	96.3032	68.032	63.1599	49.8021	57.0285	876.236	12.8072	8.48546	9.0788	9.46439	12.6201	9.38928	10.9905	7.76412	7.20809	5.68363	6.50835
318	sp|Q09666|AHNK_HUMAN	AHNAK	AHNK_HUMAN Neuroblast differentiation-associated protein AHNAK	1469	PKMKGDYDVTVPK	23.6238	U	K.GDY#DVTVPK.V	3	3	55.1522	460.894	307.682	429.847	72.5801	366.184	413.728	342.627	1467.06	2110.5	1375.4	7401.66	111.796	739.226	517.092	614.287	159.748	624.197	572.027	439.487	1800.75	2110.5	1266.47	8955.58	1.24834	8.25436	5.77397	6.85926	1.78378	6.96992	6.38738	4.90741	20.1076	23.5663	14.1417
352	sp|P00533|EGFR_HUMAN	EGFR	EGFR_HUMAN Epidermal growth factor receptor	978	ARDPQRYLVIQGD	1000	R	R.Y#LVIQGDER.M	1	1	54.94	49.7316	47.4075	70.8839	42.5897	51.7491	61.9482	71.0541	50.7922	54.5659	78.723	634.385	111.366	79.7642	79.6734	101.299	93.7391	88.2114	85.6507	91.1409	62.3449	54.5659	72.4881	920.244	12.1018	8.66773	8.65786	11.0078	10.1863	9.58565	9.30739	9.904	6.77483	5.92951	7.87706
6	sp|O60716|CTND1_HUMAN	CTNND1	CTND1_HUMAN Catenin delta-1	208	LPRNFHYPPDGYS	71.9493	R	R.NFHY#PPDGYSR.H	1	1	54.6336	55.3128	59.4575	74.7931	52.8731	56.1048	54.1606	37.7467	199.847	131.855	146.577	923.361	110.745	88.7159	99.9247	106.886	116.373	95.6361	74.8834	48.4177	245.302	131.855	134.968	1253.71	8.8334	7.07629	7.97034	8.52556	9.28231	7.62827	5.97296	3.86196	19.5662	10.5172	10.7655
2794	sp|Q9UDY2-7|ZO2_HUMAN	TJP2	ZO2_HUMAN Isoform 7 of Tight junction protein ZO-2	1017	DQLRDNSPPPAFK	1000	R	R.DNS#PPPAFKPEPPK.A	1	1	54.5277	36.2434	29.1613	44.1113	33.0564	39.5647	53.5031	53.68	41.0991	34.0195	63.9022	482.869	110.53	58.1306	49.0088	63.0386	72.7566	67.4419	73.9743	68.8553	50.4471	34.0195	58.8412	707.044	15.6327	8.22164	6.9315	8.91579	10.2903	9.53857	10.4625	9.73847	7.13493	4.81151	8.32214
1685	sp|Q96SK2|TM209_HUMAN	TMEM209	TM209_HUMAN Transmembrane protein 209	98	PTSLVVSPGQQTL	30.6121	R	K.YTVAPTSLVVS#PGQQTLLGLK.T	2	2	54.3167	39.5417	44.9159	46.0678	51.0313	51.6939	68.7726	54.1362	29.7924	33.9858	38.6054	512.86	110.103	63.4207	75.486	65.8347	112.319	88.1173	95.0861	69.4404	36.5687	33.9858	35.5478	785.909	14.0096	8.06972	9.60493	8.37688	14.2916	11.2122	12.0989	8.83568	4.65304	4.32439	4.52315
2178	sp|P17096-3|HMGA1_HUMAN	HMGA1	HMGA1_HUMAN Isoform HMG-R of High mobility group protein HMG-I/HMG-Y	44	GTALVGSQKEPSE	22.4917	R	R.KQPPVSPGTALVGS#QK.E	1	1	53.8428	45.2792	40.6763	43.7952	84.628	55.7675	64.3441	64.7515	55.1217	53.3162	55.1146	616.637	109.142	72.6231	68.3609	62.5869	186.265	95.0612	88.9633	83.0566	67.6593	53.3162	50.7495	937.784	11.6383	7.74412	7.28962	6.67392	19.8622	10.1368	9.48655	8.8567	7.2148	5.68534	5.41164
737	sp|P29353-6|SHC1_HUMAN	SHC1	SHC1_HUMAN Isoform 6 of SHC-transforming protein 1	428	LFDDPSYVNVQNL	24.437	R	R.ELFDDPSY#VNVQNLDK.A	1	1	53.2254	246.357	238.771	200.055	29.9118	233.291	256.605	236.389	284.414	320.912	301.05	2400.98	107.89	395.132	401.28	285.896	65.8353	397.667	354.787	303.215	349.104	320.912	277.207	3258.92	3.31062	12.1246	12.3133	8.7727	2.02015	12.2024	10.8866	9.30415	10.7123	9.84716	8.50607
1277	sp|Q96TA1|NIBL1_HUMAN	FAM129B	NIBL1_HUMAN Niban-like protein 1	665	QGLRPESPPPAGP	90.697	R	R.GLLAQGLRPES#PPPAGPLLNGAPAGESPQPK.A	2	1	52.8134	35.1876	33.8148	42.3006	37.4339	31.0352	41.9692	45.2035	30.2923	22.6638	40.6889	413.403	107.055	56.4373	56.8294	60.4511	82.3914	52.9025	58.0273	57.9825	37.1823	22.6638	37.4664	629.389	17.0094	8.967	9.02929	9.60472	13.0907	8.40538	9.21962	9.2125	5.90768	3.60092	5.95282
1106	sp|P51149|RAB7A_HUMAN	RAB7A	RAB7A_HUMAN Ras-related protein Rab-7a	183	ETEVELYNEFPEP	71.9493	R	K.QETEVELY#NEFPEPIK.L	5	3	52.7525	103.135	101.523	113.628	45.3308	73.1886	98.6326	123.193	311.145	500.944	323.43	1846.9	106.932	165.417	170.621	162.384	99.7723	124.757	136.371	158.02	381.915	500.944	297.814	2304.95	4.63923	7.17663	7.40237	7.045	4.32862	5.41258	5.91646	6.85568	16.5694	21.7334	12.9207
1811	sp|O00233|PSMD9_HUMAN	PSMD9	PSMD9_HUMAN 26S proteasome non-ATPase regulatory subunit 9	41	AQIKANYDVLESQ	65.4396	R	K.ANY#DVLESQK.G	2	2	52.3591	46.6686	58.9194	104.24	53.2399	97.8583	127.826	129.091	82.5526	84.0209	108.343	945.118	106.134	74.8515	99.0204	148.967	117.18	166.809	176.734	165.585	101.329	84.0209	99.762	1340.39	7.91815	5.5843	7.38741	11.1137	8.74221	12.4448	13.1852	12.3534	7.55966	6.26837	7.44274
644	sp|P21333|FLNA_HUMAN	FLNA	FLNA_HUMAN Filamin-A	1308	GNLTETYVQDRGD	30.8348	R	R.VANPSGNLTETY#VQDR.G	2	2	52.3476	47.123	47.2983	73.1096	48.7539	62.1811	98.3047	147.715	66.6052	62.4141	102.991	808.843	106.111	75.5804	79.4899	104.48	107.306	105.994	135.918	189.474	81.7547	62.4141	94.834	1143.36	9.28067	6.6104	6.95234	9.13798	9.38523	9.27041	11.8876	16.5717	7.15042	5.45885	8.29436
360	sp|P00533|EGFR_HUMAN	EGFR	EGFR_HUMAN Epidermal growth factor receptor	1166	KGSHQISLDNPDY	51.0043	R	K.GSHQIS#LDNPDY#QQDFFPK.E	6	2	52.3277	69.0484	65.8426	64.7354	39.5452	60.5549	74.6775	60.2863	71.9533	86.4309	90.954	736.356	106.071	110.746	110.656	92.5122	87.0382	103.222	103.25	77.3291	88.3191	86.4309	83.7504	1049.32	10.1085	10.5541	10.5454	8.81636	8.29469	9.83696	9.8397	7.36942	8.41676	8.23681	7.98137
730	sp|O43707|ACTN4_HUMAN	ACTN4	ACTN4_HUMAN Alpha-actinin-4	212	RPELIEYDKLRKD	1000	R	R.HRPELIEY#DK.L	1	1	52.3025	55.8068	50.7426	122.224	50.8796	88.5153	118.955	159.017	168.915	196.943	346.843	1411.14	106.02	89.5083	85.2784	174.669	111.985	150.883	164.469	203.971	207.335	196.943	319.373	1810.43	5.85603	4.94403	4.71039	9.6479	6.18554	8.33408	9.08449	11.2664	11.4522	10.8782	17.6407
1751	sp|P37802|TAGL2_HUMAN	TAGLN2	TAGL2_HUMAN Transgelin-2	8	ANRGPAYGLSREV	53.5337	U	R.GPAY#GLSR.E	1	1	52.1325	173.287	164.101	216.114	66.2523	133.148	156.047	159.603	202.612	249.016	383.793	1956.11	105.675	277.934	275.789	308.844	145.82	226.964	215.753	204.723	248.696	249.016	353.397	2612.61	4.04481	10.6382	10.5561	11.8213	5.5814	8.68726	8.25812	7.83596	9.51906	9.53132	13.5266
2106	sp|P30041|PRDX6_HUMAN	PRDX6	PRDX6_HUMAN Peroxiredoxin-6	89	SKDINAYNCEEPT	97.6019	U	K.DINAY#NCEEPTEK.L	1	1	51.049	41.3771	52.1948	76.7543	56.6885	51.037	70.4638	75.0691	62.698	70.4879	100.056	707.876	103.479	66.3645	87.719	109.688	124.77	86.9976	97.4245	96.2909	76.9587	70.4879	92.1316	1012.31	10.222	6.55574	8.66521	10.8354	12.3253	8.59395	9.62396	9.51198	7.60227	6.96306	9.1011
5	sp|O60716|CTND1_HUMAN	CTNND1	CTND1_HUMAN Catenin delta-1	600	IPQAERYQEAAPN	143.703	R	R.Y#QEAAPNVANNTGPHAASCFGAK.K	3	3	50.195	125.414	104.121	114.532	43.254	191.537	250.492	260	271.394	364.809	401.634	2177.38	101.748	201.151	174.987	163.676	95.2014	326.493	346.335	333.501	333.123	364.809	369.825	2810.85	3.61982	7.15622	6.22542	5.82301	3.38693	11.6155	12.3214	11.8648	11.8513	12.9786	13.157
1788	sp|Q8N4S9|MALD2_HUMAN	MARVELD2	MALD2_HUMAN MARVEL domain-containing protein 2	469	QDQFSEYKELSAE	31.2747	R	K.AVFQDQFSEY#K.E	2	2	50.0816	49.4513	52.8961	90.904	48.2251	76.149	139.091	289.791	90.3261	101.678	147.739	1136.33	101.518	79.3148	88.8976	129.909	106.143	129.803	192.309	371.714	110.871	101.678	136.038	1548.2	6.55717	5.12305	5.74201	8.39102	6.85589	8.38417	12.4215	24.0095	7.1613	6.56749	8.78686
1321	sp|Q86X29|LSR_HUMAN	LSR	LSR_HUMAN Lipolysis-stimulated lipoprotein receptor	406	DSMRVLYYMEKEL	24.437	R	R.VLY#YM*EK.E	1	1	49.8318	112.934	97.2928	102.292	37.1835	98.499	81.9307	88.6151	134.179	187.718	167.831	1158.31	101.011	181.135	163.511	146.184	81.8402	167.901	113.279	113.666	164.698	187.718	154.539	1575.48	6.41145	11.4971	10.3785	9.27868	5.19461	10.6571	7.1901	7.2147	10.4538	11.915	9.80898
1850	sp|P00966|ASSY_HUMAN	ASS1	ASSY_HUMAN Argininosuccinate synthase	131	QVRFELSCYSLAP	15.0073	R	R.FELS#CYSLAPQIK.V	1	1	49.0053	30.043	36.2617	31.8861	36.4388	29.7968	39.7154	27.6593	25.3533	25.5495	31.1994	362.909	99.3361	48.1858	60.9417	45.5679	80.2012	50.7916	54.9112	35.4786	31.1199	25.5495	28.7284	560.812	17.7129	8.59215	10.8667	8.12535	14.3009	9.0568	9.79138	6.32629	5.54909	4.55581	5.12264
2356	sp|Q9Y5K6|CD2AP_HUMAN	CD2AP	CD2AP_HUMAN CD2-associated protein	409	RSSGTVYPKRPEK	48.8739	U	R.SSGTVY#PK.R	1	1	47.0471	144.509	178.413	192.785	41.5696	155.691	223.718	165.349	253.831	274.222	255.38	1932.51	95.3666	231.777	299.842	275.505	91.494	265.391	309.316	212.093	311.566	274.222	235.154	2601.73	3.66551	8.90859	11.5247	10.5893	3.51667	10.2006	11.8889	8.152	11.9753	10.54	9.03839
313	sp|Q09666|AHNK_HUMAN	AHNAK	AHNK_HUMAN Neuroblast differentiation-associated protein AHNAK	121	SGDDEEYQRIYTT	66.9932	R	R.EVFSSCSSEVVLSGDDEEY#QR.I	3	1	47.0339	48.7323	38.2787	46.1862	41.2405	43.1983	42.4068	44.5259	41.8235	68.3489	46.3018	508.077	95.34	78.1616	64.3315	66.0039	90.7695	73.6357	58.6324	57.1133	51.3363	68.3489	42.6347	746.308	12.7749	10.4731	8.61997	8.84406	12.1625	9.86667	7.85632	7.65279	6.8787	9.15828	5.71275
346	sp|Q9BZI7|REN3B_HUMAN	UPF3B	REN3B_HUMAN Regulator of nonsense transcripts 3B	117	RDRFDGYVFLDNK	1000	R	R.DRFDGY#VFLDNK.G	4	4	46.8972	107.859	181.05	510.828	60.0236	278.179	589.992	870.319	374.189	410.791	620.913	4051.04	95.0629	172.994	304.273	730.015	132.111	474.184	815.733	1116.36	459.299	410.791	571.737	5282.56	1.79956	3.27482	5.75996	13.8194	2.50089	8.97641	15.442	21.1329	8.69463	7.77637	10.8231
2416	sp|Q8WX93|PALLD_HUMAN	PALLD	PALLD_HUMAN Palladin	641	TPAVLLSPTKEPP	31.2747	R	K.SLPTPAVLLS#PTK.E	1	1	46.7026	24.0051	25.0932	48.9075	26.992	26.1374	43.4406	64.6585	35.9804	32.1693	56.9641	431.051	94.6685	38.5016	42.1718	69.8928	59.4089	44.5538	60.0617	82.9374	44.1642	32.1693	52.4525	620.982	15.245	6.20012	6.79114	11.2552	9.56692	7.17472	9.67204	13.3558	7.11199	5.18038	8.4467
1566	sp|O00459|P85B_HUMAN	PIK3R2	P85B_HUMAN Phosphatidylinositol 3-kinase regulatory subunit beta	460	QDKSREYDQLYEE	25.1744	R	K.SREY#DQLYEEYTR.T	2	2	46.4302	50.6598	59.4921	86.3621	46.2913	89.2706	116	140.512	74.5765	81.3481	89.0392	879.982	94.1162	81.2529	99.9828	123.419	101.886	152.17	160.384	180.234	91.539	81.3481	81.9873	1248.32	7.53943	6.50899	8.00939	9.88677	8.16188	12.19	12.848	14.4382	7.33298	6.51661	6.56781
567	sp|P60709|ACTB_HUMAN	ACTB	ACTB_HUMAN Actin, cytoplasmic 1	53	MGQKDSYVGDEAQ	24.437	R	K.DSY#VGDEAQSK.R	1	1	46.3321	118.671	129.919	245.88	51.6081	121.672	177.783	336.628	340.903	360.249	705.098	2634.74	93.9173	190.335	218.343	351.382	113.589	207.402	245.806	431.792	418.442	360.249	649.254	3280.51	2.86289	5.802	6.65577	10.7112	3.46253	6.32224	7.49291	13.1623	12.7554	10.9815	19.7913
2438	sp|P26045|PTN3_HUMAN	PTPN3	PTN3_HUMAN Tyrosine-protein phosphatase non-receptor type 3	496	TEDASQYYCDKND	48.8739	R	K.GGSTEDASQY#YCDK.N	1	1	46.1482	51.6876	51.1158	55.3145	54.5455	59.9597	62.8094	53.1026	58.6775	45.1547	64.1346	602.65	93.5446	82.9015	85.9055	79.049	120.054	102.207	86.8414	68.1146	72.0238	45.1547	59.0551	894.851	10.4536	9.26429	9.59998	8.83376	13.4161	11.4217	9.70456	7.61183	8.04869	5.04606	6.59944
2116	sp|O60890|OPHN1_HUMAN	OPHN1	OPHN1_HUMAN Oligophrenin-1	370	DGKEPIYHSPITK	59.2977	R	K.EPIY#HSPITK.Q	2	2	45.6545	101.257	99.7834	126.516	35.2946	162.421	192.951	145.635	272.798	282.287	377.513	1842.11	92.5439	162.406	167.697	180.802	77.6828	276.862	266.778	186.806	334.847	282.287	347.614	2376.32	3.89441	6.83435	7.05698	7.60848	3.26903	11.6509	11.2265	7.86112	14.091	11.8791	14.6282
2834	sp|O75909-4|CCNK_HUMAN	CCNK	CCNK_HUMAN Isoform 4 of Cyclin-K	324	QQPKKPSPQPSSP	18.8054	R	K.KPS#PQPSS#PR.Q	1	1	45.5404	50.6281	47.8953	55.7254	58.1443	53.9554	73.6256	55.2968	47.6122	55.4716	52.2289	596.124	92.3125	81.2022	80.4932	79.6362	127.974	91.9723	101.796	70.9291	58.4417	55.4716	48.0923	888.321	10.3918	9.14108	9.06127	8.96479	14.4063	10.3535	11.4594	7.98462	6.57889	6.24454	5.41384
1709	sp|Q86Z02|HIPK1_HUMAN	HIPK1	HIPK1_HUMAN Homeodomain-interacting protein kinase 1	352	KAVCSTYLQSRYY	48.8739	R	K.AVCSTY#LQSR.Y	1	1	45.3921	30.3081	31.197	29.0712	41.0497	28.3737	39.4263	30.6335	34.5915	30.68	26.8915	367.615	92.0119	48.611	52.4299	41.5451	90.3496	48.3657	54.5115	39.2935	42.4594	30.68	24.7617	565.019	16.2847	8.60342	9.27932	7.35287	15.9905	8.56001	9.64772	6.95437	7.51468	5.4299	4.38245
2824	sp|Q9NYF8|BCLF1_HUMAN	BCLAF1	BCLF1_HUMAN Bcl-2-associated transcription factor 1	290	YSPSQNSPIHHIP	15.0073	R	R.YSPSQNS#PIHHIPSR.R	1	1	45.0591	39.3807	35.014	43.657	52.3185	49.8004	58.3195	52.0139	40.333	52.1014	56.0058	524.003	91.337	63.1625	58.8449	62.3895	115.152	84.8897	80.6335	66.7181	49.5068	52.1014	51.5702	776.306	11.7656	8.13629	7.58011	8.03671	14.8334	10.9351	10.3868	8.59431	6.37723	6.71146	6.64302
1296	sp|P07948|LYN_HUMAN	LYN	LYN_HUMAN Tyrosine-protein kinase Lyn	508	TATEGQYQQQPxx	33.6572	R	K.AEERPTFDYLQSVLDDFYTATEGQY#QQQP.-	1	1	44.9554	57.4649	54.1471	47.1725	34.1064	55.0026	51.9651	37.8188	71.5824	69.954	85.2316	609.401	91.1266	92.1677	91	67.4134	75.0675	93.7572	71.8478	48.5101	87.8639	69.954	78.4813	867.19	10.5083	10.6283	10.4937	7.77378	8.65641	10.8116	8.28514	5.59395	10.132	8.06675	9.05007
2527	sp|Q5XXA6|ANO1_HUMAN	ANO1	ANO1_HUMAN Anoctamin-1	7	MRVNEKYSTLPAE	24.437	R	K.Y#STLPAEDR.S	1	1	44.767	106.14	69.0156	105.975	43.1477	75.1966	83.8668	115.427	133.629	211.008	220.319	1208.49	90.7449	170.237	115.988	151.447	94.9674	128.18	115.956	148.058	164.023	211.008	202.87	1593.48	5.69476	10.6834	7.27892	9.50416	5.95975	8.04403	7.27689	9.29148	10.2934	13.242	12.7313
2375	sp|Q00536-2|CDK16_HUMAN	CDK16	CDK16_HUMAN Isoform 2 of Cyclin-dependent kinase 16	252	GEGTYATVYKGKS	17.0091	R	K.LGEGTY#AT#VYK.G	1	1	44.5504	28.7982	25.1527	38.7338	41.3702	33.0652	43.9808	33.9749	26.5943	28.6761	36.4746	381.371	90.3057	46.1893	42.2719	55.3538	91.0552	56.3628	60.8086	43.5796	32.6432	28.6761	33.5858	580.832	15.5477	7.95226	7.27782	9.53009	15.6767	9.7038	10.4692	7.50296	5.62007	4.93707	5.78237
2214	sp|O75533|SF3B1_HUMAN	SF3B1	SF3B1_HUMAN Splicing factor 3B subunit 1	426	GYVPIRTPARKLT	30.6121	U	K.VLPPPAGYVPIRT#PAR.K	2	1	43.9157	26.4395	28.3438	35.4569	41.4103	43.9161	50.0213	44.1741	35.537	45.9933	52.9914	448.199	89.0191	42.4061	47.6348	50.6709	91.1434	74.8593	69.1603	56.662	43.62	45.9933	48.7945	659.964	13.4885	6.42553	7.2178	7.67783	13.8104	11.3429	10.4794	8.58563	6.60945	6.96906	7.39351
1677	sp|Q15223|PVRL1_HUMAN	PVRL1	PVRL1_HUMAN Poliovirus receptor-related protein 1	468	EDAKRPYFTVDEA	31.2747	U	K.RPY#FTVDEAEAR.Q	1	1	43.755	43.7392	37.4738	35.4709	51.7959	41.9547	51.4465	40.6815	39.0227	41.3145	38.226	464.881	88.6934	70.1531	62.9787	50.6908	114.002	71.5159	71.1308	52.1821	47.8985	41.3145	35.1985	705.758	12.5671	9.9401	8.92355	7.18247	16.1531	10.1332	10.0786	7.39376	6.78681	5.85392	4.98733
1317	sp|Q86X29|LSR_HUMAN	LSR	LSR_HUMAN Lipolysis-stimulated lipoprotein receptor	586	RSGDLPYDGRLLE	81.6917	R	R.SGDLPY#DGR.L	1	1	43.6496	85.5815	80.7246	127.809	35.0224	100.49	96.3856	113.011	130.485	182.11	275.713	1270.98	88.4798	137.264	135.666	182.65	77.0838	171.295	133.264	144.959	160.164	182.11	253.877	1666.81	5.30832	8.2351	8.13926	10.958	4.62462	10.2768	7.99515	8.6968	9.60902	10.9256	15.2313
364	sp|P00533|EGFR_HUMAN	EGFR	EGFR_HUMAN Epidermal growth factor receptor	991	ERMHLPSPTDSNF	20.1669	R	R.M*HLPS#PTDS#NFYR.A	1	1	43.6212	59.8797	59.0707	98.2674	49.7318	61.2773	80.7093	89.0084	110.965	139.785	169.799	962.115	88.4223	96.0408	99.2746	140.432	109.459	104.453	111.59	114.171	136.204	139.785	156.351	1296.18	6.82174	7.40951	7.65899	10.8343	8.4447	8.05852	8.60913	8.80824	10.5081	10.7844	12.0624
1480	sp|Q8IZ21-2|PHAR4_HUMAN	PHACTR4	PHAR4_HUMAN Isoform 2 of Phosphatase and actin regulator 4	657	ILRFNEYVEVTDA	84.6094	R	R.FNEY#VEVTDAQDYDR.R	3	2	43.2334	32.9569	41.5317	75.5421	41.8347	51.5534	76.5722	92.555	68.4396	93.7366	112.321	730.277	87.6362	52.8594	69.7985	107.956	92.0774	87.8778	105.87	118.72	84.0063	93.7366	103.425	1003.96	8.72903	5.26507	6.9523	10.753	9.17139	8.75309	10.5452	11.8251	8.36746	9.33666	10.3017
2757	sp|Q01105|SET_HUMAN	SET	SET_HUMAN Protein SET	146	YFDENPYFENKVL	26.1051	R	R.IDFYFDENPY#FENK.V	1	1	43.0866	29.1099	32.0575	35.5829	40.4735	29.1824	40.1001	37.6674	43.6719	45.9005	51.3523	428.185	87.3385	46.6892	53.876	50.8508	89.0814	49.7443	55.443	48.316	53.6051	45.9005	47.2852	628.13	13.9045	7.43305	8.5772	8.09559	14.182	7.91943	8.82668	7.69203	8.53407	7.30749	7.52793
1565	sp|O00459|P85B_HUMAN	PIK3R2	P85B_HUMAN Phosphatidylinositol 3-kinase regulatory subunit beta	464	REYDQLYEEYTRT	53.5337	R	R.EYDQLY#EEYTR.T	1	1	42.9071	36.1689	38.9244	50.1044	25.6538	76.7696	83.8298	83.9843	43.5642	40.818	113.607	636.331	86.9747	58.0111	65.4166	71.6033	56.4635	130.861	115.905	107.726	53.4729	40.818	104.609	891.861	9.75204	6.5045	7.33484	8.02853	6.33098	14.6728	12.9958	12.0788	5.99565	4.57673	11.7293
2754	sp|O75694|NU155_HUMAN	NUP155	NU155_HUMAN Nuclear pore complex protein Nup155	992	SKAAPQSPSVPKK	20.1669	R	K.AAPQS#PSVPK.K	1	1	42.6988	40.4169	47.3712	50.3687	42.9478	51.3934	64.7706	59.5916	50.76	50.3323	60.4497	561.101	86.5526	64.8244	79.6124	71.9811	94.5273	87.6051	89.5529	76.438	62.3055	50.3323	55.6621	819.394	10.563	7.91127	9.71602	8.78468	11.5362	10.6915	10.9292	9.32861	7.60385	6.14263	6.79308
2110	sp|P07108-5|ACBP_HUMAN	DBI	ACBP_HUMAN Isoform 5 of Acyl-CoA-binding protein	90	EEMLFIYGHYKQA	38.1888	R	K.TKPSDEEMLFIY#GHYK.Q	1	1	42.3251	41.4936	34.8039	39.4116	44.7424	41.2562	36.8372	43.087	27.9304	37.6986	39.4332	429.019	85.7951	66.5514	58.4916	56.3224	98.4772	70.3251	50.9317	55.2676	34.2832	37.6986	36.3101	650.454	13.19	10.2315	8.99243	8.65894	15.1398	10.8117	7.83018	8.49677	5.27066	5.79573	5.58227
1549	sp|Q9UQB8|BAIP2_HUMAN	BAIAP2	BAIP2_HUMAN Brain-specific angiogenesis inhibitor 1-associated protein 2	164	SDKELQYIDAISN	126.676	R	K.ELQY#IDAISNK.Q	2	2	41.0701	93.4128	104.037	240.916	52.105	196.472	438.968	564.087	267.585	299.095	396.091	2693.84	83.2511	149.824	174.846	344.289	114.682	334.906	606.925	723.554	328.447	299.095	364.72	3524.54	2.36204	4.25089	4.96082	9.76834	3.25382	9.50212	17.22	20.529	9.31886	8.48609	10.348
1475	sp|Q9Y446|PKP3_HUMAN	PKP3	PKP3_HUMAN Plakophilin-3	176	VGSRADYDTLSLR	30.8348	R	R.ADY#DTLSLR.S	1	1	40.2413	63.4088	48.5454	57.9915	45.0781	72.3554	79.5892	73.2898	80.006	77.4686	86.4322	724.406	81.5711	101.701	81.5858	82.8746	99.216	123.337	110.041	94.0087	98.2035	77.4686	79.5867	1029.59	7.92264	9.87778	7.92407	8.04925	9.63642	11.9792	10.6878	9.13066	9.53808	7.52418	7.72991
785	sp|Q92692|PVRL2_HUMAN	PVRL2	PVRL2_HUMAN Poliovirus receptor-related protein 2	513	DKINPIYDALSYS	36.5564	U	K.INPIY#DALSYSSPSDSYQGK.G	1	1	39.998	42.1253	39.1404	19.6428	34.6628	24.1769	15.2557	16.4735	34.9144	74.9387	51.7764	393.105	81.0778	67.5646	65.7796	28.0711	76.2923	41.2119	21.0929	21.1305	42.8558	74.9387	47.6757	567.691	14.282	11.9017	11.5872	4.94479	13.4391	7.25957	3.71555	3.72219	7.54914	13.2006	8.39817
2587	sp|O00401|WASL_HUMAN	WASL	WASL_HUMAN Neural Wiskott-Aldrich syndrome protein	256	ETSKVIYDFIEKT	1000	U	K.VIY#DFIEK.T	1	1	39.9349	25.1856	33.6413	21.6674	26.657	26.1171	29.2813	25.3537	22.7066	26.811	34.726	312.082	80.95	40.395	56.5378	30.9644	58.6715	44.5192	40.4848	32.5211	27.8713	26.811	31.9757	471.702	17.1613	8.56367	11.9859	6.56441	12.4383	9.43799	8.58271	6.89443	5.90866	5.6839	6.77879
2229	sp|P0CG48|UBC_HUMAN	UBC	UBC_HUMAN Polyubiquitin-C	59	GRTLSDYNIQKES	48.8739	R	R.TLSDY#NIQK.E	2	2	39.8867	41.6142	68.773	220.771	35.3484	62.321	133.38	191.522	116.346	128.994	219.51	1258.47	80.8523	66.7448	115.58	315.5	77.8013	106.232	184.413	245.664	142.809	128.994	202.124	1666.72	4.85099	4.00457	6.93461	18.9295	4.66794	6.37375	11.0645	14.7394	8.56826	7.73943	12.1271
2207	sp|O75167-4|PHAR2_HUMAN	PHACTR2	PHAR2_HUMAN Isoform 4 of Phosphatase and actin regulator 2	590	ILRFNEYVEVTDS	31.2747	R	R.FNEY#VEVTDSPDYDR.R	2	1	39.5562	56.3123	61.5039	80.6979	38.3645	75.3225	120.031	95.7317	133.199	121.59	136.029	958.338	80.1823	90.3191	103.364	115.324	84.4397	128.394	165.957	122.795	163.495	121.59	125.255	1301.12	6.16258	6.94166	7.94425	8.86346	6.48979	9.86802	12.755	9.43765	12.5658	9.34509	9.62675
2547	sp|Q9NZM3|ITSN2_HUMAN	ITSN2	ITSN2_HUMAN Intersectin-2	553	YQNKLIYLVPEKQ	1000	R	K.LIY#LVPEK.Q	1	1	39.3706	48.1561	83.5126	341.061	42.8908	98.7271	254.786	508.919	170.498	194.798	462.301	2245.02	79.806	77.2374	140.352	487.404	94.4018	168.29	352.271	652.789	209.278	194.798	425.686	2882.31	2.76882	2.6797	4.86942	16.9102	3.27521	5.83871	12.2218	22.6481	7.26078	6.75839	14.7689
2044	sp|P04920|B3A2_HUMAN	SLC4A2	B3A2_HUMAN Anion exchange protein 2	73	GEEDFEYHRQSSH	86.8328	R	R.SYGEEDFEY#HR.Q	1	1	39.2408	38.1029	45.387	53.7556	34.3033	39.3608	43.496	44.6085	51.6188	52.2178	61.0088	503.1	79.5429	61.1131	76.2778	76.8212	75.501	67.0943	60.1383	57.2193	63.3595	52.2178	56.1769	725.462	10.9644	8.42403	10.5144	10.5893	10.4073	9.24849	8.28966	7.88728	8.73368	7.19787	7.7436
1907	sp|P25685|DNJB1_HUMAN	DNAJB1	DNJB1_HUMAN DnaJ homolog subfamily B member 1	176	VSLEEIYSGCTKK	22.4917	R	R.VSLEEIY#SGCTK.K	1	1	39.1694	29.1493	46.5878	123.811	33.1814	75.1305	125.159	126.08	72.6805	68.1524	119.037	858.137	79.3983	46.7525	78.2959	176.936	73.0316	128.067	173.046	161.722	89.2118	68.1524	109.609	1184.22	6.70467	3.94794	6.61158	14.9411	6.16705	10.8145	14.6127	13.6564	7.53336	5.75503	9.25578
2346	sp|Q96J84-2|KIRR1_HUMAN	KIRREL	KIRR1_HUMAN Isoform 2 of Kin of IRRE-like protein 1	621	KDPTNGYYNVRAH	24.437	R	K.DPTNGY#YNVR.A	1	1	38.4395	69.8772	57.7779	63.9881	36.8413	54.9167	52.3761	50.5141	79.76	102.864	105.185	712.539	77.9186	112.076	97.102	91.4443	81.0871	93.6109	72.4161	64.7944	97.9015	102.864	96.8543	988.068	7.88596	11.3429	9.82745	9.25485	8.20663	9.47414	7.32906	6.55768	9.90837	10.4106	9.80238
409	sp|P16885|PLCG2_HUMAN	PLCG2	PLCG2_HUMAN 1-phosphatidylinositol 4,5-bisphosphate phosphodiesterase gamma-2	759	YDVSRMYVDPSEI	31.2747	U	R.M*Y#VDPSEINPSMPQR.T	3	3	38.4389	149.291	141.756	135.113	46.7113	168.122	179.012	142.47	190.17	180.188	228.712	1599.98	77.9174	239.447	238.237	193.088	102.811	286.58	247.505	182.747	233.424	180.188	210.598	2192.54	3.55375	10.921	10.8658	8.80658	4.68911	13.0707	11.2885	8.33492	10.6463	8.21822	9.60519
2123	sp|Q02241-2|KIF23_HUMAN	KIF23	KIF23_HUMAN Isoform 2 of Kinesin-like protein KIF23	582	EKTTTIYEEDKRN	48.8739	R	K.TTTIY#EEDK.R	1	1	38.0677	69.4712	118.909	238.302	54.6411	224.466	410.164	510.833	310.337	283.222	349.684	2608.1	77.1651	111.425	199.839	340.553	120.264	382.624	567.1	655.244	380.924	283.222	321.989	3440.35	2.24295	3.23876	5.80867	9.8988	3.4957	11.1217	16.4838	19.0459	11.0722	8.23237	9.35921
2584	sp|P35579|MYH9_HUMAN	MYH9	MYH9_HUMAN Myosin-9	754	ELDSNLYRIGQSK	13.3795	R	K.ALELDSNLY#R.I	1	1	37.9005	36.8159	35.1613	44.9265	35.5497	36.65	43.5307	50.3282	38.6883	49.9778	68.1691	477.698	76.826	59.0489	59.0924	64.2036	78.2444	62.4734	60.1863	64.556	47.488	49.9778	62.7701	684.867	11.2177	8.62196	8.6283	9.37461	11.4248	9.12198	8.78803	9.42606	6.9339	7.29745	9.1653
814	sp|P09525|ANXA4_HUMAN	ANXA4	ANXA4_HUMAN Annexin A4	165	GRDEGNYLDDALV	1000	R	R.DEGNY#LDDALVR.Q	3	2	37.8452	57.7117	57.0753	80.5534	33.5827	81.9178	115.922	91.421	81.8988	99.3262	123.527	860.781	76.7139	92.5635	95.9211	115.117	73.9149	139.637	160.276	117.266	100.527	99.3262	113.744	1185.01	6.47372	7.81123	8.09457	9.7145	6.23751	11.7836	13.5253	9.89578	8.48323	8.38192	9.59857
2406	sp|O75955|FLOT1_HUMAN	FLOT1	FLOT1_HUMAN Flotillin-1	238	AQADLAYQLQVAK	1000	R	R.AQADLAY#QLQVAK.T	1	1	37.5591	53.7411	42.2783	47.9566	33.4301	37.5425	41.3202	50.5831	46.8891	75.0768	64.5529	530.93	76.1341	86.1951	71.0531	68.5339	73.5791	63.9949	57.13	64.8828	57.5541	75.0768	59.4403	753.574	10.1031	11.4382	9.42882	9.09452	9.76401	8.49218	7.58121	8.61001	7.63748	9.96276	7.88778
2489	sp|O60674|JAK2_HUMAN	JAK2	JAK2_HUMAN Tyrosine-protein kinase JAK2	570	RREVGDYGQLHET	26.1051	R	R.EVGDY#GQLHETEVLLK.V	1	1	37.2709	32.3773	38.2212	40.6113	30.0883	34.3603	30.7281	23.4639	33.9993	41.0367	38.407	380.564	75.5498	51.9297	64.2348	58.0368	66.2239	58.5705	42.4852	30.0972	41.7325	41.0367	35.3652	565.262	13.3654	9.18684	11.3637	10.2672	11.7156	10.3617	7.51601	5.32446	7.38286	7.25976	6.25642
2465	sp|Q13242|SRSF9_HUMAN	SRSF9	SRSF9_HUMAN Serine/arginine-rich splicing factor 9	211	PYQSRGSPHYFSP	33.6572	U	R.GS#PHYFSPFRPY.-	1	1	37.0408	25.4067	25.1256	31.3012	35.2445	32.9361	40.4206	43.676	23.8723	30.9266	31.3043	357.255	75.0835	40.7497	42.2262	44.732	77.5725	56.1428	55.8862	56.0232	29.302	30.9266	28.825	537.47	13.9698	7.58177	7.85648	8.32269	14.4329	10.4458	10.398	10.4235	5.45185	5.75411	5.36309
974	sp|P27986-4|P85A_HUMAN	PIK3R1	P85A_HUMAN Isoform 4 of Phosphatidylinositol 3-kinase regulatory subunit alpha	431	LYPVSKYQQDQVV	1000	R	K.Y#QQDQVVK.E	2	2	36.8513	75.4113	93.5995	182.53	36.7987	80.4475	141.367	140.739	253.074	260.952	325.872	1627.64	74.6994	120.952	157.304	260.851	80.9932	137.131	195.456	180.526	310.636	260.952	300.063	2079.56	3.59207	5.81621	7.56428	12.5435	3.89472	6.5942	9.39891	8.68096	14.9375	12.5484	14.4292
719	sp|Q00839|HNRPU_HUMAN	HNRNPU	HNRPU_HUMAN Heterogeneous nuclear ribonucleoprotein U	271	KYSRAKSPQPPVE	53.5672	R	K.S#PQPPVEEEDEHFDDTVVCLDTYNCDLHFK.I	1	1	36.8252	27.2261	32.0956	28.7866	34.8973	33.6422	42.5877	36.0156	28.1613	28.3249	38.5569	367.119	74.6464	43.6678	53.9401	41.1384	76.8083	57.3464	58.8824	46.1971	34.5666	28.3249	35.5032	551.022	13.5469	7.92488	9.78912	7.46584	13.9393	10.4073	10.686	8.3839	6.27318	5.14043	6.44316
1808	sp|P05141|ADT2_HUMAN	SLC25A5	ADT2_HUMAN ADP/ATP translocase 2	195	AAYFGIYDTAKGM	30.8348	U	R.AAYFGIY#DTAK.G	2	1	36.7785	42.2869	40.3268	42.7099	33.979	38.7279	54.4002	43.0884	42.5899	50.5534	50.2083	475.649	74.5518	67.8237	67.7734	61.036	74.7872	66.0155	75.2146	55.2694	52.277	50.5534	46.2318	691.534	10.7806	9.80772	9.80045	8.82617	10.8147	9.54624	10.8765	7.99229	7.55958	7.31033	6.6854
673	sp|Q12774|ARHG5_HUMAN	ARHGEF5	ARHG5_HUMAN Rho guanine nucleotide exchange factor 5	1370	RTEELIYLSQKIE	20.1669	R	R.TEELIY#LSQK.I	1	1	36.7223	27.0996	29.331	29.848	26.9406	36.7262	47.2443	36.664	35.5044	31.5321	32.3246	369.937	74.4379	43.4649	49.2939	42.6552	59.2958	62.6034	65.3207	47.0288	43.58	31.5321	29.7645	548.977	13.5594	7.91743	8.97923	7.76994	10.8011	11.4036	11.8986	8.56662	7.9384	5.7438	5.4218
2285	sp|Q9Y2H5|PKHA6_HUMAN	PLEKHA6	PKHA6_HUMAN Pleckstrin homology domain-containing family A member 6	492	PRSEDIYADPAAY	57.7111	R	R.SEDIY#ADPAAYVM*R.R	1	1	36.6348	37.8273	30.6884	21.6869	27.6087	21.2555	17.8966	13.1656	28.2472	43.8827	36.5573	315.451	74.2606	60.671	51.5751	30.9924	60.7662	36.2321	24.7442	16.8875	34.6721	43.8827	33.662	468.346	15.8559	12.9543	11.0122	6.61741	12.9746	7.73618	5.28331	3.60578	7.40309	9.36973	7.18741
2410	sp|Q7Z3K3|POGZ_HUMAN	POGZ	POGZ_HUMAN Pogo transposable element with ZNF domain	445	TPIPALSPPTKVP	25.1744	R	K.TAPVASTPSSTPIPALS#PPTK.V	1	1	36.546	33.8307	25.733	32.1958	30.8668	31.5476	38.3366	37.6317	25.5452	30.7625	36.4605	359.456	74.0805	54.2609	43.2471	46.0104	67.9372	53.776	53.0048	48.2701	31.3555	30.7625	33.5728	536.278	13.8138	10.1181	8.0643	8.57958	12.6683	10.0276	9.88383	9.00095	5.84688	5.73629	6.26034
1567	sp|O00459|P85B_HUMAN	PIK3R2	P85B_HUMAN Phosphatidylinositol 3-kinase regulatory subunit beta	467	DQLYEEYTRTSQE	24.437	R	R.EYDQLYEEY#TR.T	1	1	36.3966	41.1699	47.4908	74.1927	36.5312	101.678	121.299	136.765	78.1094	66.2616	137.323	877.218	73.7777	66.0322	79.8134	106.027	80.4044	173.321	167.709	175.429	95.8755	66.2616	126.447	1211.1	6.0918	5.45226	6.59016	8.75466	6.63897	14.311	13.8477	14.4851	7.91641	5.4712	10.4407
2024	sp|P04040|CATA_HUMAN	CAT	CATA_HUMAN Catalase	84	GAGAFGYFEVTHD	36.5564	U	K.GAGAFGY#FEVTHDITK.Y	1	1	36.2975	29.5825	29.9764	36.6057	35.7327	37.7117	45.0733	43.1749	27.1378	28.0231	36.1537	385.469	73.5767	47.4472	50.3786	52.3125	78.647	64.2833	62.319	55.3804	33.3103	28.0231	33.2903	578.969	12.7082	8.19513	8.70143	9.03547	13.584	11.1031	10.7638	9.56536	5.75339	4.84017	5.74993
315	sp|Q09666|AHNK_HUMAN	AHNAK	AHNK_HUMAN Neuroblast differentiation-associated protein AHNAK	5836	SKSKGHYEVTGSD	57.7111	U	K.GHY#EVTGSDDETGK.L	3	3	35.6991	495.632	272.653	372.924	50.4962	306.02	193.281	239.528	573.449	1015.42	835.429	4390.53	72.3637	794.942	458.223	532.939	111.141	521.641	267.233	307.242	703.881	1015.42	769.263	5554.29	1.30284	14.3122	8.24989	9.59509	2.001	9.39168	4.8113	5.53162	12.6728	18.2817	13.8499
797	sp|Q96A22|CK052_HUMAN	C11orf52	CK052_HUMAN Uncharacterized protein C11orf52	78	EDSNLHYADIQVC	49.3116	U	R.SPGLMSEDSNLHY#ADIQVCSRPHAR.E	2	2	35.5359	58.0257	54.6647	56.7994	37.9002	52.1058	59.3381	49.384	78.0809	91.7309	76.3373	649.903	72.033	93.0671	91.8698	81.171	83.4176	88.8195	82.0419	63.3447	95.8405	91.7309	70.2914	913.627	7.88428	10.1865	10.0555	8.88448	9.13037	9.72163	8.9798	6.93332	10.4901	10.0403	7.69366
362	sp|P00533|EGFR_HUMAN	EGFR	EGFR_HUMAN Epidermal growth factor receptor	998	PTDSNFYRALMDE	24.2431	R	R.MHLPSPTDSNFY#R.A	3	3	35.5106	81.9989	81.1283	70.8584	32.2039	56.9433	59.7425	90.8773	107.947	204.615	159.227	981.052	71.9816	131.518	136.345	101.263	70.8803	97.0654	82.601	116.568	132.499	204.615	146.616	1291.95	5.57154	10.1798	10.5534	7.83795	5.4863	7.51308	6.3935	9.02264	10.2557	15.8377	11.3484
1147	sp|Q9H422|HIPK3_HUMAN	HIPK3	HIPK3_HUMAN Homeodomain-interacting protein kinase 3	362	CSTYLQSRYYRAP	20.1669	R	K.TVCS#TYLQS#R.Y	1	1	35.3767	28.1507	31.1811	31.2149	38.0537	32.6624	37.3215	28.6936	28.7187	34.495	30.0195	355.888	71.7103	45.1508	52.4031	44.6087	83.7555	55.6763	51.6013	36.8052	35.2509	34.495	27.6419	539.099	13.3019	8.37524	9.7205	8.27467	15.5362	10.3277	9.57176	6.82717	6.53885	6.39863	5.12744
1068	sp|Q7KZF4|SND1_HUMAN	SND1	SND1_HUMAN Staphylococcal nuclease domain-containing protein 1	329	LRIWRDYVAPTAN	76.7327	U	R.DY#VAPTANLDQK.D	3	3	34.869	59.4028	90.9699	368.004	42.7587	155.921	300.777	575.452	334.903	369.748	878.357	3211.16	70.6811	95.2759	152.885	525.909	94.1111	265.783	415.86	738.132	411.078	369.748	808.791	3948.25	1.79019	2.41312	3.87221	13.32	2.38361	6.73166	10.5327	18.6952	10.4116	9.36485	20.4848
944	sp|P07355-2|ANXA2_HUMAN	ANXA2	ANXA2_HUMAN Isoform 2 of Annexin A2	42	STPPSAYGSVKAY	30.8348	R	K.LSLEGDHSTPPSAY#GSVK.A	1	1	34.627	100.363	70.0209	91.1105	36.0739	149.441	219.835	267.637	128.623	279.452	266.816	1644	70.1906	160.972	117.678	130.204	79.3981	254.737	303.948	343.298	157.879	279.452	245.684	2143.44	3.27467	7.50996	5.49013	6.07455	3.70424	11.8845	14.1804	16.0162	7.36568	13.0376	11.4622
277	sp|P68363|TBA1B_HUMAN	TUBA1B	TBA1B_HUMAN Tubulin alpha-1B chain	282	ISAEKAYHEQLSV	30.07	R	K.AY#HEQLSVAEITNACFEPANQM*VK.C	3	3	34.5862	217.264	231.218	269.464	38.2317	194.061	177.455	169.813	157.908	191.032	262.969	1944	70.1078	348.468	388.587	385.087	84.1473	330.796	245.352	217.818	193.824	191.032	242.141	2697.36	2.59912	12.9188	14.4062	14.2764	3.11961	12.2637	9.09601	8.07524	7.1857	7.08219	8.97697
2148	sp|Q96I25|SPF45_HUMAN	RBM17	SPF45_HUMAN Splicing factor 45	222	EQDRPRSPTGPSN	14.966	R	R.S#PTGPSNSFLANMGGTVAHK.I	1	1	34.0373	40.8767	49.581	44.5396	30.4732	42.5451	54.8574	43.9986	45.3508	49.9912	60.2429	496.494	68.9952	65.562	83.3261	63.6508	67.0711	72.5223	75.8467	56.4369	55.6659	49.9912	55.4717	714.54	9.6559	9.17542	11.6615	8.90794	9.38661	10.1495	10.6148	7.89835	7.79046	6.99628	7.76327
1387	sp|Q14680|MELK_HUMAN	MELK	MELK_HUMAN Maternal embryonic leucine zipper kinase	438	AVKNEEYFMFPEP	1000	R	K.NEEY#FM*FPEPK.T	2	1	34.0263	66.0813	52.9095	36.6874	31.4028	42.3219	43.0798	55.4874	65.4868	114.517	73.0336	615.034	68.9729	105.987	88.92	52.4293	69.1171	72.1419	59.5628	71.1736	80.3819	114.517	67.2493	850.453	8.11013	12.4625	10.4556	6.16486	8.12709	8.48276	7.00366	8.3689	9.45166	13.4654	7.90747
2795	sp|Q9UDY2-7|ZO2_HUMAN	TJP2	ZO2_HUMAN Isoform 7 of Tight junction protein ZO-2	292	RAYDPDYERAYSP	44.2778	R	R.AYDPDY#ER.A	1	1	33.9128	38.0356	37.3261	42.9838	30.7725	64.0873	64.8905	54.4799	79.2426	90.5753	119.405	655.712	68.7428	61.0052	62.7305	61.4274	67.7297	109.243	89.7188	69.8813	97.2664	90.5753	109.948	888.269	7.73897	6.86787	7.0621	6.9154	7.62491	12.2984	10.1004	7.86713	10.9501	10.1968	12.3778
798	sp|Q96A22|CK052_HUMAN	C11orf52	CK052_HUMAN Uncharacterized protein C11orf52	103	LENATEYATLRFP	31.2747	U	K.HVHLENATEY#ATLR.F	2	2	33.858	156.697	155.712	110.028	20.9957	92.8449	100.337	56.7233	213.097	224.322	174.976	1339.59	68.6317	251.326	261.69	157.239	46.2112	158.263	138.728	72.7589	261.567	224.322	161.118	1801.85	3.80895	13.9482	14.5234	8.7265	2.56464	8.78335	7.69916	4.038	14.5165	12.4495	8.94177
1070	sp|P50402|EMD_HUMAN	EMD	EMD_HUMAN Emerin	49	TQRRRLSPPSSSA	22.4917	U	R.RLS#PPSSSAASSYSFSDLNSTR.G	1	1	33.751	37.3213	37.7396	45.2375	33.1382	42.7544	47.9107	46.9273	38.9043	44.6263	52.8785	461.189	68.4148	59.8595	63.4255	64.6482	72.9366	72.8791	66.2421	60.1936	47.7532	44.6263	48.6905	669.669	10.2162	8.93866	9.47116	9.65374	10.8914	10.8828	9.89177	8.98856	7.13086	6.66394	7.27083
2876	sp|P61619|S61A1_HUMAN	SEC61A1	S61A1_HUMAN Protein transport protein Sec61 subunit alpha isoform 1	279	RGQYNTYPIKLFY	24.437	R	R.GQYNTY#PIK.L	1	1	33.7422	36.4924	27.7913	73.4976	28.9992	40.8798	56.2736	106.463	50.1686	54.6146	122.187	631.109	68.397	58.53	46.7063	105.034	63.8267	69.6835	77.8048	136.559	61.5795	54.6146	112.51	855.246	7.99735	6.84365	5.46115	12.2812	7.46296	8.14778	9.09736	15.9673	7.2002	6.38584	13.1553
1018	sp|Q14247|SRC8_HUMAN	CTTN	SRC8_HUMAN Src substrate cortactin	141	SAVGFEYQGKTEK	123.857	R	K.SAVGFEY#QGK.T	1	1	33.1563	52.9307	37.0262	50.0233	27.2803	50.0657	49.6533	47.4224	55.7918	82.1252	79.1906	564.666	67.2093	84.8953	62.2265	71.4874	60.0435	85.3419	68.6514	60.8286	68.4817	82.1252	72.9187	784.21	8.57032	10.8256	7.93494	9.11585	7.65656	10.8825	8.75422	7.75668	8.73258	10.4723	9.29837
1661	sp|P55011|S12A2_HUMAN	SLC12A2	S12A2_HUMAN Solute carrier family 12 member 2	957	VVSVEYSKKSDLD	24.437	R	K.DVVVSVEYS#K.K	1	1	32.961	39.4984	27.4403	103.164	27.1981	23.3784	39.8549	119.948	51.572	53.2724	185.853	704.14	66.8135	63.3513	46.1164	147.43	59.8626	39.8507	55.1041	153.857	63.3021	53.2724	171.133	920.093	7.2616	6.88531	5.01215	16.0234	6.50614	4.33116	5.98897	16.7219	6.87996	5.78989	18.5995
1010	sp|Q9UJM3|ERRFI_HUMAN	ERRFI1	ERRFI_HUMAN ERBB receptor feedback inhibitor 1	394	KVSSTHYYLLPER	17.0091	U	K.VSSTHY#YLLPERPPYLDK.Y	3	2	32.7072	116.729	167.723	110.928	39.491	175.119	189.909	225.978	109.929	184.381	190.664	1543.56	66.2991	187.221	281.877	158.525	86.9189	298.508	262.572	289.861	134.932	184.381	175.563	2126.66	3.11753	8.80351	13.2545	7.45417	4.08711	14.0365	12.3467	13.6299	6.34481	8.66998	8.25535
1878	sp|Q8IY95|TM192_HUMAN	TMEM192	TM192_HUMAN Transmembrane protein 192	213	LEEEKIYAYPSNI	48.8739	R	K.IY#AYPSNITSETGFR.T	1	1	32.6227	41.4745	46.3012	41.5941	42.9532	34.0031	39.4007	34.7395	31.9592	26.5933	33.6695	405.311	66.1277	66.5207	77.8141	59.4414	94.5393	57.9616	54.476	44.5603	39.2284	26.5933	31.0029	618.266	10.6957	10.7592	12.5859	9.61422	15.291	9.37487	8.8111	7.20731	6.34491	4.30127	5.01449
935	sp|A1X283|SPD2B_HUMAN	SH3PXD2B	SPD2B_HUMAN SH3 and PX domain-containing protein 2B	226	PEEEEKYTVIYPY	24.437	R	K.Y#TVIYPYTAR.D	1	1	32.6198	30.2149	32.6706	53.8532	38.3911	44.8785	63.1186	119.273	59.8114	55.7219	85.057	615.61	66.1218	48.4616	54.9065	76.9606	84.4981	76.4998	87.2688	152.991	73.4155	55.7219	78.3205	855.166	7.73204	5.66692	6.42056	8.99949	9.8809	8.9456	10.2049	17.8902	8.58494	6.51592	9.15851
1465	sp|Q02487|DSC2_HUMAN	DSC2	DSC2_HUMAN Desmocollin-2	839	RLGEKVYLCNQDE	1000	U	K.VY#LCNQDENHK.H	1	1	32.5481	59.7497	62.1837	94.7153	34.9045	81.546	93.9834	110.521	94.0457	107.246	147.69	919.134	65.9766	95.8323	104.506	135.356	76.8241	139.003	129.943	141.765	115.437	107.246	135.993	1247.88	5.28708	7.6796	8.3747	10.8469	6.15636	11.1391	10.4131	11.3605	9.25059	8.5942	10.8979
559	sp|Q13263|TIF1B_HUMAN	TRIM28	TIF1B_HUMAN Transcription intermediary factor 1-beta	541	GTAPAGTPGAPPL	60.3582	R	R.GAAAAATGQPGTAPAGT#PGAPPLAGMAIVK.E	4	3	32.4398	49.5579	43.9793	106.645	31.5188	49.7065	76.7971	249.608	234.211	326.836	827.904	2029.2	65.7569	79.4857	73.9119	152.405	69.3723	84.7295	106.181	320.172	287.483	326.836	762.334	2328.67	2.8238	3.41336	3.174	6.54472	2.97905	3.63854	4.55973	13.7491	12.3454	14.0353	32.7369
1845	sp|O94832|MYO1D_HUMAN	MYO1D	MYO1D_HUMAN Unconventional myosin-Id	435	PWKHIDYFNNQII	1000	R	K.HIDY#FNNQIIVDLVEQQHK.G	1	1	32.3979	24.2762	22.0868	46.04	31.7704	37.2069	47.5775	49.0652	40.7604	38.8085	37.564	407.554	65.6721	38.9365	37.1192	65.795	69.9262	63.4228	65.7814	62.9359	50.0314	38.8085	34.589	593.018	11.0742	6.56582	6.25937	11.0949	11.7916	10.6949	11.0927	10.6128	8.43675	6.54423	5.8327
2338	sp|Q9H1E3|NUCKS_HUMAN	NUCKS1	NUCKS_HUMAN Nuclear ubiquitous casein and cyclin-dependent kinase substrate 1	214	EDEEPESPPEKKT	50.1945	R	K.TPSPKEEDEEPES#PPEK.K	1	1	32.3316	28.3115	23.4251	27.4546	34.2257	28.0186	33.1209	27.4958	20.2058	20.9687	21.1182	296.676	65.5376	45.4087	39.3683	39.2348	75.3302	47.7604	45.7936	35.2688	24.8016	20.9687	19.4457	458.918	14.2809	9.89473	8.5785	8.54941	16.4147	10.4072	9.97858	7.68519	5.40436	4.56916	4.23728
320	sp|Q09666|AHNK_HUMAN	AHNAK	AHNK_HUMAN Neuroblast differentiation-associated protein AHNAK	5731	KGGVTGSPEASIS	15.0073	U	K.GGVTGS#PEASISGSK.G	1	1	32.2585	32.6589	31.7632	25.9442	28.3172	34.7816	40.4704	35.0597	37.4128	41.9801	45.1903	385.837	65.3895	52.3814	53.3815	37.0764	62.3256	59.2886	55.9551	44.971	45.9224	41.9801	41.6112	560.283	11.6708	9.3491	9.5276	6.61744	11.124	10.5819	9.98694	8.02648	8.19629	7.49266	7.42682
973	sp|Q9H329-2|E41LB_HUMAN	EPB41L4B	E41LB_HUMAN Isoform 2 of Band 4.1-like protein 4B	493	DDSHFDYVHDQNQ	84.6094	U	K.ASASGDDSHFDY#VHDQNQK.N	2	2	31.9885	61.0007	67.022	47.5971	27.2471	49.9271	50.8448	57.2085	124.597	288.941	145.279	951.652	64.8422	97.8388	112.638	68.0201	59.9703	85.1056	70.2989	73.3812	152.937	288.941	133.773	1207.75	5.36887	8.10095	9.32627	5.63199	4.96548	7.04665	5.82067	6.07588	12.663	23.924	11.0762
1590	sp|Q15262-3|PTPRK_HUMAN	PTPRK	PTPRK_HUMAN Isoform 3 of Receptor-type tyrosine-protein phosphatase kappa	917	NRAKNRYGNIIAY	73.6163	R	R.Y#GNIIAYDHSR.V	1	1	31.3356	29.6828	27.0863	36.1575	37.6765	36.083	49.309	65.8146	31.6906	36.194	54.3309	435.361	63.5187	47.6081	45.5214	51.6721	82.9252	61.5069	68.1755	84.4203	38.8987	36.194	50.0279	630.469	10.0748	7.55122	7.22025	8.19582	13.1529	9.75574	10.8135	13.3901	6.16981	5.7408	7.93504
1575	sp|P00505|AATM_HUMAN	GOT2	AATM_HUMAN Aspartate aminotransferase, mitochondrial	96	KNLDKEYLPIGGL	1000	U	K.EY#LPIGGLAEFCK.A	1	1	31.3116	27.8929	34.576	26.4238	31.5573	27.2916	41.1272	41.8793	25.9504	15.8845	19.6411	323.536	63.4702	44.7373	58.1087	37.7618	69.4572	46.5212	56.8631	53.7185	31.8529	15.8845	18.0855	496.461	12.7845	9.01125	11.7046	7.6062	13.9905	9.37056	11.4537	10.8203	6.41599	3.19954	3.64288
1739	sp|Q13813-2|SPTN1_HUMAN	SPTAN1	SPTN1_HUMAN Isoform 2 of Spectrin alpha chain, non-erythrocytic 1	1073	KQVEELYHSLLEL	20.1669	R	K.QVEELY#HSLLELGEK.R	1	1	31.2997	25.8898	26.5031	50.2466	33.9551	32.3587	55.5892	83.5931	35.3393	40.3624	68.2737	483.41	63.4459	41.5245	44.5413	71.8065	74.7346	55.1585	76.8585	107.225	43.3773	40.3624	62.8664	681.9	9.30427	6.08953	6.53193	10.5303	10.9597	8.08894	11.2712	15.7244	6.36123	5.9191	9.21929
593	sp|P56524|HDAC4_HUMAN	HDAC4	HDAC4_HUMAN Histone deacetylase 4	465	HRPLGRTQSAPLP	14.966	R	R.T#QSAPLPQNAQALQHLVIQQQHQQFLEK.H	1	1	31.2471	22.3331	24.3535	25.041	32.0222	28.8944	29.4175	22.8159	19.284	19.1401	21.8769	276.426	63.3394	35.8199	40.9287	35.7857	70.4803	49.2533	40.6731	29.266	23.6701	19.1401	20.1443	428.501	14.7816	8.35935	9.55159	8.35137	16.4481	11.4943	9.49195	6.82985	5.52394	4.46676	4.70111
359	sp|P00533|EGFR_HUMAN	EGFR	EGFR_HUMAN Epidermal growth factor receptor	1081	GALTEDSIDDTFL	64.6536	R	R.YSSDPTGALTEDS#IDDTFLPVPEYINQSVPK.R	2	2	30.5315	205.504	194.266	134.736	23.1917	144.74	80.7201	97.9291	217.199	306.169	244.324	1679.31	61.8888	329.606	326.485	192.549	51.0445	246.724	111.605	125.614	266.601	306.169	224.973	2243.26	2.75888	14.6932	14.5541	8.58344	2.27546	10.9984	4.97512	5.5996	11.8846	13.6484	10.0289
2839	sp|Q13424|SNTA1_HUMAN	SNTA1	SNTA1_HUMAN Alpha-1-syntrophin	175	MKDVSPYFKNSTG	17.0091	U	K.DVSPY#FK.N	1	1	30.4747	70.4741	61.8546	62.6894	29.8962	84.8231	131.21	102.879	329.416	381.579	301.528	1586.82	61.7737	113.033	103.953	89.5884	65.801	144.589	181.413	131.963	404.342	381.579	277.647	1955.68	3.15868	5.77972	5.31545	4.58092	3.3646	7.39329	9.2762	6.74765	20.6752	19.5113	14.197
2433	sp|Q9P035|HACD3_HUMAN	PTPLAD1	HACD3_HUMAN Very-long-chain (3R)-3-hydroxyacyl-[acyl-carrier protein] dehydratase 3	316	FSFTLPYPVKIKV	37.5398	R	R.FSFTLPY#PVK.I	1	1	30.4644	26.3573	25.5719	23.5633	30.5135	33.1255	37.0403	31.7424	21.0649	28.5271	26.4639	314.435	61.7529	42.2743	42.9763	33.6739	67.1596	56.4656	51.2125	40.716	25.8562	28.5271	24.3679	474.982	13.0011	8.90019	9.04798	7.0895	14.1394	11.8879	10.782	8.5721	5.44361	6.00594	5.13028
2579	sp|P11387|TOP1_HUMAN	TOP1	TOP1_HUMAN DNA topoisomerase 1	125	EPEDDGYFVPPKE	1000	U	K.DEPEDDGY#FVPPK.E	1	1	30.3466	58.8211	61.8955	68.5998	21.7065	57.493	65.5445	48.9459	84.1678	140.653	140.444	778.618	61.514	94.3429	104.022	98.0348	47.7757	98.0024	90.6229	62.7828	103.312	140.653	129.321	1030.38	5.97001	9.1561	10.0955	9.5144	4.63669	9.51126	8.79507	6.09315	10.0265	13.6505	12.5508
652	sp|Q13191|CBLB_HUMAN	CBLB	CBLB_HUMAN E3 ubiquitin-protein ligase CBL-B	709	EEDDDEYKIPSSH	179.101	R	K.TRDPVEEDDDEY#K.I	1	1	30.3045	141.434	158.887	145.834	24.9936	85.2747	56.5158	48.5842	143.713	199.195	203.056	1237.79	61.4286	226.845	267.026	208.408	55.0105	145.359	78.1397	62.3189	176.4	199.195	186.974	1667.11	3.68475	13.6071	16.0173	12.5012	3.29976	8.71924	4.68715	3.73815	10.5812	11.9485	11.2155
1476	sp|P29401-2|TKT_HUMAN	TKT	TKT_HUMAN Isoform 2 of Transketolase	283	QIIQEIYSQIQSK	48.3154	R	K.NM*AEQIIQEIY#SQIQSK.K	2	1	30.226	22.2315	18.9205	21.3378	23.7642	23.311	26.1816	24.1877	16.7908	14.8753	24.8381	246.664	61.2695	35.657	31.7979	30.4934	52.3045	39.7358	36.1991	31.0256	20.6099	14.8753	22.8709	376.839	16.2588	9.46212	8.43807	8.09189	13.8798	10.5445	9.60598	8.23311	5.46915	3.94738	6.06915
823	sp|Q16625|OCLN_HUMAN	OCLN	OCLN_HUMAN Occludin	443	DTGLQEYKSLQSE	84.3587	R	K.RNFDTGLQEY#K.S	1	1	29.7426	27.5396	46.9659	153.979	32.9691	87.2579	245.086	351.297	192.071	241.449	104.621	1512.98	60.2897	44.1706	78.9312	220.049	72.5644	148.74	338.86	450.608	235.758	241.449	96.3348	1987.75	3.03306	2.22214	3.97087	11.0702	3.65057	7.48279	17.0474	22.6692	11.8605	12.1468	4.84641
2530	sp|Q9H857|NT5D2_HUMAN	NT5DC2	NT5D2_HUMAN 5'-nucleotidase domain-containing protein 2	456	RTFHNPTYFSRRL	13.3795	R	R.TFHNPT#YFSR.R	1	1	29.7138	28.3836	23.3048	28.1324	26.6569	27.959	32.1071	28.2119	27.2925	30.0555	29.1535	310.971	60.2314	45.5243	39.1662	40.2035	58.6715	47.6588	44.3918	36.1874	33.5002	30.0555	26.8445	462.435	13.0248	9.84448	8.46957	8.69386	12.6875	10.3061	9.59957	7.8254	7.24431	6.49939	5.80504
514	sp|P46940|IQGA1_HUMAN	IQGAP1	IQGA1_HUMAN Ras GTPase-activating-like protein IQGAP1	172	PQIQDLYGKVDFT	1000	R	K.LGLAPQIQDLY#GK.V	1	1	29.5666	26.1292	21.0135	24.4575	19.3152	28.1895	26.4051	25.5003	31.8524	36.0111	42.4903	310.931	59.9329	41.9086	35.3154	34.9518	42.5124	48.0517	36.5082	32.7092	39.0972	36.0111	39.1251	446.124	13.4341	9.39393	7.91607	7.83455	9.5293	10.7709	8.18343	7.33187	8.76376	8.07201	8.77001
1622	sp|P12931-2|SRC_HUMAN	SRC	SRC_HUMAN Isoform 2 of Proto-oncogene tyrosine-protein kinase Src	193	ETTKGAYCLSVSD	23.6238	R	K.GAY#CLSVSDFDNAK.G	1	1	29.5229	32.4461	30.6095	27.9466	30.9126	27.9541	27.0329	32.1998	33.829	40.2481	37.2	349.902	59.8444	52.0402	51.4426	39.938	68.038	47.6506	37.3762	41.3026	41.5235	40.2481	34.2538	513.658	11.6506	10.1313	10.015	7.77522	13.2458	9.27671	7.27647	8.04087	8.08388	7.83559	6.6686
568	sp|P60709|ACTB_HUMAN	ACTB	ACTB_HUMAN Actin, cytoplasmic 1	198	ILTERGYSFTTTA	24.437	R	R.GY#SFTTTAER.E	1	1	29.5047	57.2793	88.5713	207.557	27.9404	79.707	150.322	252.465	153.966	167.638	328.466	1543.42	59.8075	91.8699	148.854	296.616	61.4962	135.868	207.837	323.837	188.985	167.638	302.451	1985.26	3.01258	4.6276	7.49794	14.9409	3.09764	6.84386	10.469	16.3121	9.51942	8.44416	15.2348
526	sp|Q13480-2|GAB1_HUMAN	GAB1	GAB1_HUMAN Isoform 2 of GRB2-associated-binding protein 1	406	ASSQDCYDIPRAF	58.5514	R	K.DASSQDCY#DIPR.A	2	2	29.4969	98.2736	106.63	66.2043	27.1046	95.2323	57.9532	58.5813	107.636	154.945	120.367	922.423	59.7916	157.62	179.202	94.6114	59.6567	162.333	80.1271	75.1421	132.117	154.945	110.834	1266.38	4.72146	12.4465	14.1508	7.47101	4.7108	12.8186	6.32725	5.93361	10.4327	12.2353	8.75199
1532	sp|P50395|GDIB_HUMAN	GDI2	GDIB_HUMAN Rab GDP dissociation inhibitor beta	442	RKKNDIYGEDxxx	1000	R	K.NDIY#GED.-	1	1	29.4103	35.4079	30.8592	33.4289	30.5051	38.8567	36.3093	32.2471	28.314	29.8886	42.4918	367.719	59.6161	56.7905	51.8622	47.7727	67.1413	66.235	50.2018	41.3632	34.754	29.8886	39.1264	544.752	10.9437	10.425	9.52034	8.76962	12.3251	12.1588	9.21554	7.59305	6.37979	5.48664	7.18243
714	sp|O75886|STAM2_HUMAN	STAM2	STAM2_HUMAN Signal transducing adapter molecule 2	291	SEPEPVYIDEDKM	62.6585	R	K.KSEPEPVY#IDEDK.M	2	2	29.2901	53.553	58.3011	188.499	26.5534	63.8029	123.374	213.856	129.642	128.333	241.587	1256.79	59.3725	85.8934	97.9812	269.38	58.4435	108.758	170.579	274.313	159.129	128.333	222.454	1634.64	3.63215	5.25458	5.99406	16.4795	3.57532	6.65335	10.4353	16.7813	9.73484	7.85087	13.6087
2546	sp|Q9NZM3|ITSN2_HUMAN	ITSN2	ITSN2_HUMAN Intersectin-2	968	EEPEALYAAVNKK	1000	R	K.REEPEALY#AAVNK.K	1	1	29.1457	42.8469	43.8218	43.8618	29.521	40.2276	43.9252	38.8633	72.7853	115.553	70.8871	571.438	59.0797	68.7219	73.6472	62.6821	64.9753	68.5719	60.7317	49.8499	89.3404	115.553	65.2728	778.425	7.58964	8.82832	9.46104	8.05242	8.34701	8.80905	7.80187	6.40394	11.4771	14.8444	8.38524
651	sp|P08754|GNAI3_HUMAN	GNAI3	GNAI3_HUMAN Guanine nucleotide-binding protein G(k) subunit alpha	61	IIHEDGYSEDECK	30.8348	U	K.IIHEDGY#SEDECK.Q	1	1	29.0864	54.8499	58.2533	119.415	29.8634	106.396	185.013	262.675	120.923	138.164	174.785	1279.42	58.9596	87.9735	97.9008	170.654	65.7289	181.362	255.802	336.933	148.428	138.164	160.942	1702.85	3.46241	5.16626	5.74924	10.0217	3.85994	10.6505	15.022	19.7865	8.71643	8.11371	9.45135
1247	sp|P04406|G3P_HUMAN	GAPDH	G3P_HUMAN Glyceraldehyde-3-phosphate dehydrogenase	184	VHAITATQKTVDG	73.3109	R	K.VIHDNFGIVEGLM*TTVHAITAT#QK.T	2	1	29.0498	20.094	19.4272	23.2097	23.7507	17.0236	26.9748	27.0302	14.2864	13.5117	21.2695	235.627	58.8852	32.2287	32.6495	33.1686	52.2748	29.0184	37.2958	34.6716	17.5359	13.5117	19.5849	360.825	16.3196	8.93194	9.04857	9.19243	14.4876	8.04222	10.3362	9.60896	4.85994	3.74467	5.42782
516	sp|P46940|IQGA1_HUMAN	IQGAP1	IQGA1_HUMAN Ras GTPase-activating-like protein IQGAP1	1114	EASKLPYDVTPEQ	28.9337	R	K.SWVNQM*ESQTGEASKLPY#DVTPEQALAHEEVK.T	4	4	28.9222	62.509	96.401	163.781	25.1263	117.105	231.97	258.719	260.061	316.766	363.76	1925.12	58.6267	100.258	162.012	234.056	55.3026	199.616	320.726	331.858	319.212	316.766	334.95	2433.38	2.40927	4.1201	6.6579	9.61855	2.27266	8.20324	13.1802	13.6377	13.118	13.0175	13.7648
534	sp|P08865|RSSA_HUMAN	RPSA	RSSA_HUMAN 40S ribosomal protein SA	139	PLTEASYVNLPTI	19.8431	R	R.ADHQPLTEASY#VNLPTIALCNTDSPLR.Y	1	1	28.8997	25.5175	24.3991	21.9042	29.8386	26.0688	34.6105	30.5998	18.9518	14.8372	28.0898	283.717	58.581	40.9275	41.0053	31.3029	65.6742	44.4368	47.853	39.2503	23.2625	14.8372	25.8651	432.996	13.5292	9.45216	9.47014	7.22939	15.1674	10.2626	11.0516	9.06482	5.37245	3.42663	5.97353
1279	sp|O15231-6|ZN185_HUMAN	ZNF185	ZN185_HUMAN Isoform 6 of Zinc finger protein 185	613	ILFVKEYVNASEV	27.1205	R	K.EY#VNASEVSSGKPVSAR.Y	1	1	28.6711	53.2052	50.063	49.6348	27.5291	58.2284	63.1123	53.268	133.25	185.92	139.833	842.714	58.1176	85.3356	84.1362	70.9322	60.5911	99.2559	87.2602	68.3268	163.558	185.92	128.758	1092.19	5.32119	7.81325	7.70343	6.49448	5.54766	9.08778	7.98946	6.25594	14.9752	17.0226	11.789
1735	sp|P53396|ACLY_HUMAN	ACLY	ACLY_HUMAN ATP-citrate synthase	682	RTTDGVYEGVAIG	31.2747	R	R.TTDGVY#EGVAIGGDR.Y	1	1	28.5866	26.7631	25.804	26.2476	37.1105	28.2161	34.7969	31.2445	19.3996	22.685	35.4631	316.317	57.9465	42.9252	43.3664	37.51	81.6795	48.0972	48.1108	40.0772	23.812	22.685	32.6544	478.864	12.1008	8.96396	9.05609	7.83313	17.0569	10.044	10.0469	8.36922	4.9726	4.73726	6.81914
1414	sp|Q9UQC2|GAB2_HUMAN	GAB2	GAB2_HUMAN GRB2-associated-binding protein 2	643	SDEKVDYVQVDKE	1000	R	K.VDY#VQVDK.E	2	2	28.122	706.324	562.444	299.652	1.6486	119.989	87.6853	77.1077	585.376	584.636	300.831	3353.82	57.0046	1132.87	945.247	428.227	3.62855	204.533	121.235	98.9059	718.521	584.636	277.006	4571.81	1.24687	24.7794	20.6755	9.36667	0.0793678	4.47377	2.6518	2.16339	15.7163	12.7878	6.05899
1319	sp|Q86X29|LSR_HUMAN	LSR	LSR_HUMAN Lipolysis-stimulated lipoprotein receptor	535	RSRDDLYDQDDSR	39.6629	R	R.SRDDLY#DQDDSRDFPR.S	1	1	28.0948	52.7559	70.6033	73.1678	28.0163	63.4361	47.1562	56.7217	83.5114	144.336	92.106	739.905	56.9495	84.615	118.656	104.563	61.6634	108.133	65.1989	72.7568	102.506	144.336	84.8112	1004.19	5.67119	8.4262	11.8161	10.4127	6.14062	10.7682	6.49269	7.24533	10.2079	14.3734	8.44575
1322	sp|Q86X29|LSR_HUMAN	LSR	LSR_HUMAN Lipolysis-stimulated lipoprotein receptor	372	AGGQGSYVPLLRD	17.0091	R	R.SSSAGGQGSY#VPLLR.D	1	1	27.9642	28.5312	22.4812	27.9401	22.8853	24.7695	37.5327	30.1008	29.5203	39.7174	33.0863	324.529	56.6848	45.7611	37.7821	39.9286	50.3701	42.2221	51.8933	38.6103	36.2347	39.7174	30.4659	469.67	12.0691	9.74323	8.04438	8.50142	10.7246	8.98973	11.0489	8.22073	7.71492	8.45645	6.48665
931	sp|Q8N684-3|CPSF7_HUMAN	CPSF7	CPSF7_HUMAN Isoform 3 of Cleavage and polyadenylation specificity factor subunit 7	494	EDRHDDYFQERNR	1000	R	R.DLLHNEDRHDDY#FQER.N	2	1	27.8047	35.5996	29.9998	38.9775	30.2053	26.5708	43.0609	28.7439	48.2287	58.7988	60.7111	428.701	56.3615	57.098	50.4178	55.7021	66.4814	45.2925	59.5368	36.8698	59.1984	58.7988	55.9028	601.66	9.36766	9.49008	8.37979	9.25807	11.0497	7.52793	9.89542	6.12801	9.83919	9.77276	9.29142
902	sp|Q9NUP9|LIN7C_HUMAN	LIN7C	LIN7C_HUMAN Protein lin-7 homolog C	58	EVYEHVYETVDIS	18.8054	U	R.EVYEHVY#ETVDISSSPEVR.A	1	1	27.5233	24.3897	23.8107	22.2403	26.0828	24.2323	35.0358	33.2546	21.1777	24.8524	31.8283	294.428	55.7911	39.1185	40.0165	31.7832	57.4078	41.3064	48.4411	42.6556	25.9946	24.8524	29.3075	436.675	12.7763	8.95826	9.16392	7.27846	13.1466	9.4593	11.0932	9.76828	5.95286	5.69128	6.71152
1988	sp|Q9UGK3-2|STAP2_HUMAN	STAP2	STAP2_HUMAN Isoform 2 of Signal-transducing adaptor protein 2	256	YEKVLGYVEADKE	1000	R	K.VLGY#VEADK.E	1	1	27.5053	68.5265	63.5589	58.3159	18.1426	75.6952	107.241	61.0248	71.778	91.0526	64.7502	707.591	55.7545	109.909	106.817	83.3383	39.9315	129.03	148.273	78.2764	88.1039	91.0526	59.622	990.109	5.63114	11.1007	10.7885	8.41708	4.03304	13.0319	14.9754	7.90583	8.89841	9.19622	6.02176
2224	sp|P31949|S10AB_HUMAN	S100A11	S10AB_HUMAN Protein S100-A11	32	GKDGYNYTLSKTE	24.437	U	K.DGYNY#TLSK.T	1	1	27.443	105.154	110.963	233.019	39.6987	146.134	243.398	378.001	198.986	237.459	417.367	2137.62	55.6282	168.656	186.486	333.004	87.3762	249.099	336.526	484.862	244.246	237.459	384.312	2767.65	2.00994	6.09383	6.73805	12.032	3.15705	9.00038	12.1593	17.5189	8.82501	8.57979	13.8858
2288	sp|P55196-5|AFAD_HUMAN	MLLT4	AFAD_HUMAN Isoform 5 of Afadin	1229	QTYTREYFTFPAS	17.0091	R	R.EY#FTFPASK.S	1	1	27.3501	87.1418	61.9004	59.8151	27.0489	51.9911	53.5498	50.4342	80.4126	131.081	113.098	743.822	55.44	139.766	104.03	85.4807	59.5341	88.624	74.0388	64.6918	98.7025	131.081	104.141	1005.53	5.51351	13.8998	10.3458	8.50106	5.92068	8.81366	7.36317	6.43361	9.81598	13.036	10.3568
890	sp|Q9NYB9|ABI2_HUMAN	ABI2	ABI2_HUMAN Abl interactor 2	213	PVVPNDYVPSPTR	26.9265	R	R.TLEPVRPPVVPNDY#VPSPTR.N	1	1	27.3468	87.4134	77.6446	49.3811	20.5661	86.1012	70.1428	43.9982	110.613	93.7376	95.6311	762.576	55.4332	140.202	130.49	70.5696	45.2656	146.768	96.9807	56.4364	135.772	93.7376	88.0571	1059.71	5.23097	13.2302	12.3137	6.65932	4.2715	13.8498	9.15161	5.32563	12.8122	8.84558	8.30953
840	sp|P12236|ADT3_HUMAN	SLC25A6	ADT3_HUMAN ADP/ATP translocase 3	81	LANVIRYFPTQAL	53.5337	R	R.Y#FPTQALNFAFK.D	1	1	27.302	26.5714	27.4577	18.1161	24.0095	25.5514	38.6977	40.3769	21.0662	20.4593	24.3274	293.936	55.3424	42.6177	46.1455	25.8894	52.8445	43.5549	53.5041	51.7913	25.8577	20.4593	22.4007	440.408	12.5662	9.67687	10.4779	5.87851	11.999	9.88968	12.1488	11.7599	5.87132	4.64555	5.08635
599	sp|Q96AE4-2|FUBP1_HUMAN	FUBP1	FUBP1_HUMAN Isoform 2 of Far upstream element-binding protein 1	60	NSNDYGYGGQKRP	76.7327	R	K.IGGDAGTSLNSNDYGY#GGQK.R	1	1	27.0941	53.8147	46.5565	58.7048	19.4952	42.0994	35.1171	29.5028	73.2516	95.7348	124.383	605.754	54.9209	86.3132	78.2432	83.8941	42.9086	71.7626	48.5534	37.8431	89.9127	95.7348	114.532	804.619	6.82571	10.7272	9.72426	10.4266	5.33278	8.91883	6.03434	4.70324	11.1746	11.8982	14.2343
1981	sp|P46108|CRK_HUMAN	CRK	CRK_HUMAN Adapter molecule crk	108	EFYKIHYLDTTTL	45.026	R	K.IHY#LDTTTLIEPVSR.S	1	1	27.0665	30.873	32.3821	38.4968	37.6127	46.1687	66.3698	75.2624	39.0167	50.8341	55.1574	499.24	54.865	49.5171	54.4216	55.0151	82.7849	78.6991	91.764	96.5389	47.8911	50.8341	50.789	713.12	7.69366	6.94373	7.63148	7.71471	11.6088	11.0359	12.868	13.5375	6.71571	7.12841	7.12208
2118	sp|Q8NI35|INADL_HUMAN	INADL	INADL_HUMAN InaD-like protein	393	SHTGEASGIYVKS	15.0073	R	R.IVGYVGTSHTGEAS#GIYVK.S	1	1	27.0177	32.4627	31.2451	30.5458	31.8373	33.3367	38.9545	44.892	35.7374	38.0985	42.0669	386.195	54.7662	52.0667	52.5107	43.6525	70.0734	56.8256	53.8591	57.5829	43.8659	38.0985	38.7352	562.037	9.74423	9.26393	9.34293	7.76683	12.4678	10.1107	9.58285	10.2454	7.80482	6.77865	6.89194
1178	sp|O95208|EPN2_HUMAN	EPN2	EPN2_HUMAN Epsin-2	17	KNIVNNYSEAEIK	30.8348	R	K.NIVNNY#SEAEIK.V	2	2	26.8923	30.1818	36.9791	142.495	28.8494	58.9567	111.615	166.99	101.503	123.222	228.501	1056.19	54.5121	48.4085	62.1474	203.638	63.497	100.497	154.321	214.198	124.59	123.222	210.404	1359.43	4.00991	3.56093	4.57156	14.9796	4.67084	7.39259	11.3518	15.7564	9.16485	9.06418	15.4773
832	sp|P41567|EIF1_HUMAN	EIF1	EIF1_HUMAN Eukaryotic translation initiation factor 1	30	PAGTEDYIHIRIQ	57.7111	R	K.GDDLLPAGTEDY#IHIR.I	1	1	26.8639	33.2939	28.4841	59.0247	28.3923	30.0787	50.853	104.529	48.9874	46.9149	74.8322	532.254	54.4545	53.3999	47.8705	84.3511	62.491	51.2721	70.3102	134.079	60.1297	46.9149	68.9055	734.178	7.41706	7.27342	6.52028	11.4892	8.51169	6.98361	9.57671	18.2625	8.19007	6.39012	9.38538
856	sp|P51991|ROA3_HUMAN	HNRNPA3	ROA3_HUMAN Heterogeneous nuclear ribonucleoprotein A3	145	EYNLRDYFEKYGK	111.687	R	K.EDTEEYNLRDY#FEK.Y	1	1	26.8572	33.0541	28.4241	86.3846	26.8392	45.7644	84.2526	213.374	58.3823	62.8355	83.8907	750.059	54.4409	53.0153	47.7697	123.451	59.0726	78.0099	116.489	273.695	71.6614	62.8355	77.2466	1017.69	5.34947	5.20939	4.69395	12.1305	5.8046	7.66542	11.4465	26.8938	7.0416	6.17435	7.59041
1021	sp|Q14247|SRC8_HUMAN	CTTN	SRC8_HUMAN Src substrate cortactin	334	TQVSSAYQKTVPV	20.1669	R	K.NASTFEDVTQVSSAY#QK.T	1	1	26.7145	25.4407	32.4103	31.4433	22.6651	36.7033	33.368	31.9805	37.3578	43.2507	55.7804	377.115	54.1515	40.8042	54.469	44.9351	49.8854	62.5643	46.1351	41.0214	45.8549	43.2507	51.3626	534.434	10.1325	7.63502	10.1919	8.40798	9.33425	11.7066	8.63252	7.67566	8.58009	8.0928	9.61064
2146	sp|Q13884|SNTB1_HUMAN	SNTB1	SNTB1_HUMAN Beta-1-syntrophin	87	GAQPPDSPAGVRT	1000	R	R.GAGAGHPGAGGAQPPDS#PAGVR.T	1	1	26.681	19.7577	24.2821	17.71	27.4129	20.905	25.2976	18.6458	28.5765	23.6509	27.4519	260.371	54.0837	31.6892	40.8087	25.309	60.3353	35.6346	34.977	23.917	35.0762	23.6509	25.2777	390.759	13.8407	8.10965	10.4434	6.47687	15.4405	9.11933	8.95102	6.12064	8.97643	6.05255	6.46886
2225	sp|Q03135|CAV1_HUMAN	CAV1	CAV1_HUMAN Caveolin-1	6	xMSGGKYVDSEGH	15.0073	U	K.Y#VDSEGHLYTVPIR.E	1	1	26.6792	87.5938	76.12	65.4596	28.1303	37.4821	44.9773	62.6539	56.7298	98.1944	85.4019	669.422	54.08	140.491	127.928	93.5471	61.9143	63.8919	62.1863	80.3661	69.6331	98.1944	78.638	930.87	5.80962	15.0925	13.7428	10.0494	6.65123	6.86367	6.68045	8.63343	7.48042	10.5487	8.4478
1564	sp|O00459|P85B_HUMAN	PIK3R2	P85B_HUMAN Phosphatidylinositol 3-kinase regulatory subunit beta	453	KVYHQQYQDKSRE	58.5514	R	K.VYHQQY#QDK.S	1	1	26.434	39.9227	66.4303	160.941	30.4328	158.416	271.169	267.11	205.097	211.433	225.017	1662.4	53.5831	64.0319	111.643	229.997	66.9821	270.036	374.923	342.622	251.747	211.433	207.195	2184.19	2.45322	2.9316	5.11141	10.5301	3.06668	12.3632	17.1653	15.6864	11.5259	9.68015	9.48612
2886	sp|Q14160-3|SCRIB_HUMAN	SCRIB	SCRIB_HUMAN Isoform 3 of Protein scribble homolog	1360	FRERQKYFELEVR	1000	R	K.Y#FELEVR.V	1	1	26.3861	25.0498	24.9392	34.5796	20.7967	21.8034	31.3679	25.7539	31.9883	29.9477	28.429	301.041	53.4858	40.1772	41.9129	49.417	45.7732	37.166	43.3698	33.0345	39.264	29.9477	26.1775	439.726	12.1634	9.13688	9.53161	11.2382	10.4095	8.45209	9.86293	7.51252	8.92921	6.81054	5.95314
865	sp|Q6IBS0|TWF2_HUMAN	TWF2	TWF2_HUMAN Twinfilin-2	309	LTAEFLYDEVHPK	101.329	U	K.KIEIGDGAELTAEFLY#DEVHPK.Q	1	1	26.2038	21.1705	23.9888	31.4468	23.1661	19.3534	35.2368	63.9761	22.6252	17.7073	42.4405	327.315	53.1164	33.9553	40.3158	44.94	50.9881	32.9898	48.719	82.062	27.7713	17.7073	39.0792	471.644	11.262	7.19935	8.54792	9.52837	10.8107	6.99464	10.3296	17.3991	5.88819	3.75437	8.28574
1017	sp|Q14247|SRC8_HUMAN	CTTN	SRC8_HUMAN Src substrate cortactin	178	SAVGFDYQGKTEK	123.857	R	K.SAVGFDY#QGK.T	1	1	26.0171	54.1619	42.7381	47.8651	24.9161	42.0718	41.6736	39.7261	66.6797	81.5242	89.5218	556.896	52.7378	86.8701	71.826	68.4032	54.8398	71.7156	57.6187	50.9566	81.8461	81.5242	82.4317	760.77	6.93216	11.4187	9.44123	8.99131	7.20846	9.42671	7.57373	6.69804	10.7583	10.716	10.8353
2513	sp|Q8N3F8|MILK1_HUMAN	MICALL1	MILK1_HUMAN MICAL-like protein 1	760	RQADVEYELRCLL	1000	R	R.QADVEY#ELR.C	1	1	25.9864	22.6626	20.831	32.6092	19.937	27.6341	35.0899	66.1992	28.2649	29.0324	52.0747	360.322	52.6757	36.3484	35.0087	46.6012	43.881	47.105	48.5159	84.9136	34.6938	29.0324	47.9504	506.726	10.3953	7.17318	6.90881	9.19652	8.65971	9.29595	9.57438	16.7573	6.84666	5.72941	9.46278
841	sp|P12236|ADT3_HUMAN	SLC25A6	ADT3_HUMAN ADP/ATP translocase 3	191	IIYRAAYFGVYDT	20.1669	R	R.AAY#FGVYDTAK.G	1	1	25.8688	21.2826	22.1156	30.6273	22.1769	26.4733	37.125	27.7746	22.3205	26.2421	32.9383	294.945	52.4372	34.135	37.1676	43.7689	48.8109	45.1263	51.3296	35.6264	27.3973	26.2421	30.3296	432.371	12.1278	7.89484	8.59624	10.123	11.2891	10.4369	11.8717	8.23978	6.33652	6.06934	7.01472
311	sp|Q09666|AHNK_HUMAN	AHNAK	AHNK_HUMAN Neuroblast differentiation-associated protein AHNAK	5089	TMFGKMYFPDVEF	1000	U	K.M*Y#FPDVEFDIK.S	4	2	25.8531	198.017	105.687	126.444	29.1844	110.475	84.2907	94.3	226.218	321.113	216.454	1538.03	52.4055	317.598	177.618	180.699	64.2343	188.315	116.542	120.958	277.672	321.113	199.31	2016.46	2.59888	15.7503	8.80837	8.96117	3.18549	9.33887	5.77951	5.99854	13.7702	15.9245	9.88416
1071	sp|Q9UIQ6|LCAP_HUMAN	LNPEP	LCAP_HUMAN Leucyl-cystinyl aminopeptidase	46	EPDEVEYEPRGSR	1000	R	K.EPCLHPLEPDEVEY#EPR.G	1	1	25.6934	32.2758	36.4162	71.3616	22.8322	37.3366	47.2404	75.5156	39.3512	71.0439	113.2	572.267	52.0817	51.7671	61.2013	101.982	50.2532	63.6438	65.3154	96.8638	48.3016	71.0439	104.234	766.688	6.79308	6.75204	7.98256	13.3016	6.55458	8.30114	8.51916	12.6341	6.30004	9.26634	13.5954
1876	sp|P41240|CSK_HUMAN	CSK	CSK_HUMAN Tyrosine-protein kinase CSK	64	GIIPANYVQKREG	1000	R	R.EGIIPANY#VQK.R	2	2	25.6884	37.237	40.9525	89.7857	23.5497	44.6446	68.995	54.2791	52.1729	56.7055	66.5687	560.579	52.0717	59.7243	68.825	128.311	51.8324	76.1011	95.3937	69.6237	64.0397	56.7055	61.2964	783.925	6.64243	7.61863	8.77954	16.3678	6.61192	9.7077	12.1687	8.88142	8.16911	7.23354	7.81918
1084	sp|Q99569|PKP4_HUMAN	PKP4	PKP4_HUMAN Plakophilin-4	1168	LKSTTNYVDFYST	30.8348	R	K.STTNY#VDFYSTK.R	1	1	25.5958	55.9354	55.5316	40.3812	18.8789	37.2039	42.3928	31.4079	91.9156	139.64	101.912	640.795	51.8838	89.7145	93.3269	57.7081	41.5522	63.4177	58.613	40.2869	112.822	139.64	93.8402	842.805	6.15609	10.6447	11.0734	6.84714	4.93023	7.5246	6.95451	4.7801	13.3865	16.5685	11.1343
1292	sp|P13797|PLST_HUMAN	PLS3	PLST_HUMAN Plastin-3	127	YSEEEKYAFVNWI	1000	R	K.Y#AFVNWINK.A	1	1	25.5793	22.102	24.3513	20.5908	29.8198	23.09	28.5534	28.7361	20.2169	16.2925	35.4837	274.816	51.8504	35.4493	40.925	29.426	65.6328	39.3591	39.4784	36.8597	24.8153	16.2925	32.6734	412.762	12.5618	8.58832	9.9149	7.12904	15.9009	9.53555	9.56445	8.93002	6.012	3.9472	7.9158
2142	sp|O95721|SNP29_HUMAN	SNAP29	SNP29_HUMAN Synaptosomal-associated protein 29	189	AMSTDAYPKNPHL	104.477	R	R.GAGSAM*STDAY#PK.N	1	1	25.458	79.6212	100.63	129.377	28.5653	129.387	146.096	116.657	192.346	190.999	169.424	1308.56	51.6047	127.704	169.119	184.891	62.8717	220.553	201.995	149.636	236.095	190.999	156.005	1751.47	2.94636	7.29124	9.6558	10.5563	3.58965	12.5924	11.5328	8.54343	13.4798	10.9051	8.90709
1738	sp|Q13813-2|SPTN1_HUMAN	SPTAN1	SPTN1_HUMAN Isoform 2 of Spectrin alpha chain, non-erythrocytic 1	1261	ALNTDNYGHDLAS	23.6238	R	K.NQALNTDNY#GHDLASVQALQR.K	1	1	25.4276	23.4591	23.1483	28.0529	23.091	27.0623	23.3915	31.1221	23.7033	30.7092	28.2732	287.441	51.5429	37.6259	38.9033	40.0899	50.8228	46.1303	32.3414	39.9203	29.0947	30.7092	26.034	423.215	12.1789	8.8905	9.19232	9.47272	12.0088	10.9	7.64185	9.43264	6.87469	7.25618	6.15148
2625	sp|O00571|DDX3X_HUMAN	DDX3X	DDX3X_HUMAN ATP-dependent RNA helicase DDX3X	266	YGRRKQYPISLVL	24.2431	R	K.QY#PISLVLAPTR.E	1	1	25.0697	20.3319	16.9541	26.32	21.6556	19.4621	25.0624	17.3442	23.9594	24.6342	28.2995	249.093	50.8175	32.6102	28.4931	37.6135	47.6637	33.175	34.6517	22.2473	29.409	24.6342	26.0582	367.374	13.8326	8.87659	7.7559	10.2385	12.9742	9.03033	9.43228	6.05578	8.00521	6.7055	7.09311
691	sp|P05023|AT1A1_HUMAN	ATP1A1	AT1A1_HUMAN Sodium/potassium-transporting ATPase subunit alpha-1	684	LDDILKYHTEIVF	20.1669	R	K.Y#HTEIVFAR.T	1	1	24.9994	20.2909	14.7869	22.7581	19.2897	18.6004	22.1404	16.2285	17.5318	16.8968	19.8565	213.379	50.6749	32.5445	24.8509	32.5232	42.4564	31.7063	30.6117	20.8163	21.5194	16.8968	18.2838	322.884	15.6944	10.0793	7.69654	10.0727	13.1491	9.8197	9.48072	6.44698	6.66474	5.23308	5.66266
1789	sp|Q8N4S9|MALD2_HUMAN	MARVELD2	MALD2_HUMAN MARVEL domain-containing protein 2	23	VPSDLPYQDTTIR	15.0073	R	R.RYDEVPSDLPY#QDTTIR.T	1	1	24.4683	29.6095	25.8667	29.8698	26.6764	21.9563	22.8283	26.1541	41.8231	71.4245	49.8082	370.485	49.5985	47.4905	43.4718	42.6864	58.7143	37.4266	31.5628	33.5478	51.3359	71.4245	45.8634	513.122	9.66601	9.25519	8.472	8.31895	11.4426	7.2939	6.15112	6.53798	10.0046	13.9196	8.9381
2677	sp|Q9H8Y8|GORS2_HUMAN	GORASP2	GORS2_HUMAN Golgi reassembly-stacking protein 2	225	MAGTPITPLKDGF	23.6238	R	K.ISLPGQM*AGTPIT#PLK.D	1	1	24.4267	20.4148	27.4157	36.1694	13.1439	22.1945	23.367	28.144	25.8752	24.0433	32.2079	277.402	49.5142	32.7433	46.075	51.689	28.9294	37.8328	32.3076	36.1003	31.7605	24.0433	29.6571	400.652	12.3584	8.17249	11.5	12.9012	7.22057	9.44279	8.06375	9.01038	7.9272	6.00104	7.40219
515	sp|P46940|IQGA1_HUMAN	IQGAP1	IQGA1_HUMAN Ras GTPase-activating-like protein IQGAP1	1526	YGEQVDYYKSYIK	30.8348	R	K.ATFYGEQVDY#YK.S	2	2	24.2864	27.5739	28.6292	62.7051	16.3105	33.6075	61.5315	120.985	44.4354	68.4713	129.868	618.403	49.2297	44.2256	48.1144	89.6107	35.8992	57.2872	85.0745	155.187	54.5423	68.4713	119.582	807.224	6.09864	5.47872	5.96048	11.1011	4.44724	7.09682	10.5391	19.2248	6.75677	8.48232	14.814
1534	sp|P50395|GDIB_HUMAN	GDI2	GDIB_HUMAN Rab GDP dissociation inhibitor beta	203	YLDQPCYETINRI	17.0091	R	R.TDDYLDQPCY#ETINR.I	1	1	24.2538	28.5273	13.9156	16.6986	26.0109	19.4751	24.4419	19.0763	15.2424	13.6348	20.9914	222.268	49.1636	45.7548	23.3866	23.8637	57.2496	33.1972	33.7938	24.4691	18.7093	13.6348	19.3288	342.552	14.3522	13.3571	6.82718	6.96646	16.7127	9.69116	9.86531	7.1432	5.46176	3.98037	5.64261
2648	sp|Q8TEW0|PARD3_HUMAN	PARD3	PARD3_HUMAN Partitioning defective 3 homolog	386	SRFSPDSQYIDNR	17.0091	R	R.FSPDS#QYIDNR.S	1	1	24.0291	19.1597	17.8218	20.6105	20.6422	17.7648	25.1718	22.629	18.7091	20.6865	21.1659	228.39	48.7081	30.7302	29.9515	29.454	45.4332	30.2818	34.8029	29.0262	22.9645	20.6865	19.4896	341.529	14.2618	8.99783	8.76984	8.62418	13.3029	8.86656	10.1903	8.4989	6.72404	6.05704	5.70657
1810	sp|O00233|PSMD9_HUMAN	PSMD9	PSMD9_HUMAN 26S proteasome non-ATPase regulatory subunit 9	62	LVDCEGYPRSDVD	1000	R	K.GIGM*NEPLVDCEGY#PR.S	4	2	23.7255	40.343	36.9971	64.1656	22.222	50.736	68.1233	49.9821	46.9753	48.9348	61.8537	514.059	48.0926	64.706	62.1776	91.698	48.9103	86.4845	94.1884	64.1119	57.6599	48.9348	56.9549	723.919	6.64337	8.93829	8.58903	12.6669	6.75632	11.9467	13.0109	8.85623	7.96497	6.75971	7.86758
587	sp|P25787|PSA2_HUMAN	PSMA2	PSA2_HUMAN Proteasome subunit alpha type-2	97	RKLAQQYYLVYQE	17.0091	R	K.LAQQY#YLVYQEPIPTAQLVQR.V	1	1	23.6683	15.7033	17.0828	20.3587	24.1511	21.401	19.6934	24.7042	20.695	23.8479	23.6533	234.959	47.9768	25.1865	28.7094	29.0942	53.1562	36.48	27.2284	31.688	25.4021	23.8479	21.7799	350.549	13.6862	7.18486	8.18984	8.2996	15.1637	10.4065	7.76734	9.03952	7.24638	6.80301	6.21308
1466	sp|Q02487|DSC2_HUMAN	DSC2	DSC2_HUMAN Desmocollin-2	853	HKHAQDYVLTYNY	87.265	U	K.HAQDY#VLTYNYEGR.G	2	2	23.0203	67.4852	44.6262	88.8731	24.5192	61.5938	75.7494	94.8239	107.351	169.011	144.051	901.105	46.6633	108.239	74.9992	127.007	53.9664	104.993	104.732	121.63	131.769	169.011	132.642	1175.65	3.96914	9.20673	6.37937	10.8031	4.59034	8.93058	8.90845	10.3458	11.2081	14.3759	11.2824
2357	sp|P42680|TEC_HUMAN	TEC	TEC_HUMAN Tyrosine-protein kinase Tec	228	KYGNEGYIPSNYV	23.6238	U	K.YGNEGY#IPSNYVTGK.K	1	1	22.7338	30.9724	34.8076	55.9937	24.7865	69.0457	92.3925	104.59	63.7658	68.0639	69.8905	637.043	46.0825	49.6765	58.4978	80.0195	54.5546	117.695	127.743	134.158	78.2694	68.0639	64.3552	879.116	5.24191	5.65074	6.65417	9.10227	6.20562	13.3879	14.5309	15.2605	8.9032	7.74231	7.32045
1717	sp|Q9H792|PEAK1_HUMAN	PEAK1	PEAK1_HUMAN Pseudopodium-enriched atypical kinase 1	635	VINPNAYDNLAIY	73.6163	R	K.VPIVINPNAY#DNLAIYK.S	1	1	22.4226	9.976	8.65643	15.0407	21.9181	25.3409	26.2583	31.4283	100.324	126.143	107.494	495.002	45.4517	16.0005	14.5481	21.4944	48.2414	43.196	36.3052	40.313	123.143	126.143	98.9801	613.816	7.40477	2.60672	2.3701	3.50176	7.85927	7.03729	5.91467	6.56761	20.0618	20.5506	16.1254
1462	sp|P29317|EPHA2_HUMAN	EPHA2	EPHA2_HUMAN Ephrin type-A receptor 2	628	GEFGEVYKGMLKT	1000	U	K.VIGAGEFGEVY#K.G	1	1	22.3318	19.5402	19.1472	26.0344	20.4139	19.3737	30.2596	25.9821	19.0954	18.1262	21.6928	241.997	45.2677	31.3404	32.179	37.2052	44.9305	33.0243	41.8375	33.3272	23.4387	18.1262	19.9747	360.651	12.5517	8.68995	8.92246	10.3161	12.4582	9.15685	11.6005	9.24082	6.49899	5.02595	5.5385
1515	sp|O60684|IMA7_HUMAN	KPNA6	IMA7_HUMAN Importin subunit alpha-7	474	GLIEEAYGLDKIE	111.739	R	R.SGSGVNPYCGLIEEAY#GLDK.I	1	1	22.3275	15.652	15.0697	18.5929	16.6276	16.1857	27.2059	31.1247	21.7164	18.6963	28.283	231.482	45.259	25.1041	25.3263	26.5708	36.5971	27.5901	37.6153	39.9236	26.6558	18.6963	26.043	335.381	13.4948	7.48525	7.55149	7.92255	10.9121	8.22648	11.2157	11.9039	7.9479	5.57464	7.7652
316	sp|Q09666|AHNK_HUMAN	AHNAK	AHNK_HUMAN Neuroblast differentiation-associated protein AHNAK	964	PKVKGEYDMTVPK	33.6572	U	K.VKGEY#DMTVPK.L	1	1	22.3131	217.938	163.909	206.206	22.4427	168.826	164.273	148.143	395.816	596.149	426.874	2532.89	45.2296	349.55	275.466	294.685	49.3959	287.781	227.127	190.023	485.845	596.149	393.066	3194.32	1.41594	10.9429	8.62364	9.2253	1.54637	9.00916	7.11033	5.94877	15.2097	18.6628	12.3052
2326	sp|Q8N6M0|OTU6B_HUMAN	OTUD6B	OTU6B_HUMAN OTU domain-containing protein 6B	272	VYMRHAYGLGEHY	124.374	U	R.HAY#GLGEHYNSVTR.L	1	1	21.6732	20.0236	17.7574	28.9814	16.3903	19.0368	21.2614	18.4645	25.3099	35.174	44.8375	268.91	43.9325	32.1158	29.8432	41.4167	36.0748	32.4501	29.3964	23.6844	31.0667	35.174	41.2864	376.441	11.6705	8.53142	7.92772	11.0022	9.58313	8.62023	7.80904	6.29166	8.25274	9.34382	10.9676
13	sp|O60716|CTND1_HUMAN	CTNND1	CTND1_HUMAN Catenin delta-1	228	PGGSDNYGSLSRV	13.3795	R	R.HYEDGYPGGSDNY#GSLSR.V	1	1	21.6285	45.2253	34.0039	23.7698	20.5649	24.7312	16.8881	20.9653	49.058	141.297	98.4675	496.6	43.842	72.5367	57.1471	33.969	45.2631	42.1567	23.3497	26.8921	60.2163	141.297	90.6688	637.339	6.87891	11.3812	8.96653	5.32981	7.10189	6.61449	3.66363	4.21943	9.44809	22.1699	14.2262
2486	sp|Q7Z699|SPRE1_HUMAN	SPRED1	SPRE1_HUMAN Sprouty-related, EVH1 domain-containing protein 1	292	DSKKSDYLYSCGD	31.2747	U	K.KSDY#LYSCGDETK.L	1	1	21.4442	35.9367	26.6137	26.0179	21.175	25.0515	34.3848	31.4821	55.0054	61.9518	54.4482	393.511	43.4684	57.6387	44.7272	37.1817	46.6058	42.7027	47.541	40.382	67.5164	61.9518	50.1359	539.852	8.05192	10.6768	8.28509	6.8874	8.63307	7.91008	8.80631	7.48021	12.5065	11.4757	9.28698
2	sp|P46109|CRKL_HUMAN	CRKL	CRKL_HUMAN Crk-like protein	127	AEDNLEYVRTLYD	14.0028	U	R.YPSPPMGSVSAPNLPTAEDNLEY#VR.T	1	1	21.2326	20.1635	20.904	22.3416	20.6464	27.6826	25.9783	24.9752	22.9913	18.5027	31.754	257.172	43.0396	32.3402	35.1314	31.9279	45.4424	47.1877	35.9181	32.0356	28.2207	18.5027	29.2391	378.985	11.3565	8.53335	9.26985	8.42458	11.9905	12.4511	9.47743	8.45299	7.44638	4.88218	7.71511
2816	sp|P98172|EFNB1_HUMAN	EFNB1	EFNB1_HUMAN Ephrin-B1	317	NNYCPHYEKVSGD	45.598	U	R.TTENNY#CPHY#EK.V	1	1	21.1725	16.6083	13.1003	15.1155	21.5567	22.4601	27.7044	18.1754	20.4984	21.5026	20.9656	218.86	42.9176	26.6379	22.0165	21.6013	47.446	38.2854	38.3046	23.3136	25.1608	21.5026	19.3051	326.491	13.1451	8.15885	6.74335	6.6162	14.5321	11.7263	11.7322	7.14064	7.70643	6.58596	5.9129
1660	sp|P55011|S12A2_HUMAN	SLC12A2	S12A2_HUMAN Solute carrier family 12 member 2	275	RDAVVTYTAESKG	24.437	R	R.DAVVTY#TAESK.G	1	1	21.1584	40.6568	42.954	126.28	18.4685	62.5563	77.2297	171.929	113.3	101.591	216.887	993.011	42.8891	65.2092	72.1889	180.464	40.6488	106.633	106.779	220.533	139.071	101.591	199.71	1275.72	3.36196	5.11158	5.65869	14.1461	3.18635	8.3587	8.37013	17.287	10.9014	7.96347	15.6547
900	sp|Q01082|SPTB2_HUMAN	SPTBN1	SPTB2_HUMAN Spectrin beta chain, non-erythrocytic 1	2249	AASGIPYHSEVPV	44.2778	U	K.TAASGIPY#HSEVPVSLK.E	1	1	21.1517	42.9338	58.9045	163.153	25.3441	81.9083	160.304	377.081	97.8023	111.902	233.032	1373.52	42.8755	68.8614	98.9954	233.159	55.7819	139.621	221.639	483.682	120.048	111.902	214.576	1791.14	2.39375	3.84456	5.52695	13.0173	3.11432	7.79507	12.3742	27.0041	6.7023	6.24753	11.9798
596	sp|Q15464|SHB_HUMAN	SHB	SHB_HUMAN SH2 domain-containing adapter protein B	336	DRPADEYDQPWEW	1000	U	K.LPQDDDRPADEY#DQPWEWNR.V	2	2	20.9968	35.8221	32.3505	44.7148	22.5922	40.6881	39.1046	36.9483	49.8407	52.092	55.191	430.341	42.5615	57.4549	54.3684	63.9011	49.725	69.3569	54.0667	47.3935	61.1771	52.092	50.8198	602.917	7.05927	9.52949	9.01756	10.5987	8.2474	11.5036	8.96751	7.86071	10.1468	8.63999	8.42899
2177	sp|Q15427|SF3B4_HUMAN	SF3B4	SF3B4_HUMAN Splicing factor 3B subunit 4	16	NQDATVYVGGLDE	17.0091	U	R.NQDATVY#VGGLDEK.V	1	1	20.9692	18.3309	18.1727	25.2234	24.2286	23.5437	32.1119	50.6543	29.9824	27.2557	39.9086	310.381	42.5056	29.4009	30.5411	36.0463	53.3267	40.1325	44.3984	64.9742	36.802	27.2557	36.7478	442.131	9.61379	6.64981	6.9077	8.15284	12.0613	9.07706	10.0419	14.6957	8.32377	6.16462	8.31152
2561	sp|Q96CN7|ISOC1_HUMAN	ISOC1	ISOC1_HUMAN Isochorismatase domain-containing protein 1	160	VIVTEQYPKGLGS	33.6572	R	R.ILGIPVIVTEQY#PK.G	1	1	20.7786	20.7789	18.8205	19.7427	22.0825	23.2088	20.5165	15.9569	17.4423	17.3065	20.7324	217.367	42.1193	33.3271	31.6298	28.2139	48.6031	39.5616	28.3665	20.4679	21.4095	17.3065	19.0904	330.096	12.7597	10.0962	9.58202	8.54718	14.7239	11.9849	8.59342	6.20061	6.48586	5.24289	5.78329
2027	sp|P07737|PROF1_HUMAN	PFN1	PROF1_HUMAN Profilin-1	129	LINKKCYEMASHL	99.2279	R	K.CY#EMASHLR.R	1	1	20.6466	17.6714	20.2964	25.2692	19.6909	18.06	24.588	22.0239	19.1862	24.3727	27.0122	238.818	41.8517	28.343	34.1104	36.1118	43.3393	30.785	33.9958	28.25	23.5501	24.3727	24.8729	349.583	11.9719	8.10767	9.75745	10.33	12.3974	8.80622	9.72468	8.08106	6.73663	6.97194	7.11502
2637	sp|Q86X27|RGPS2_HUMAN	RALGPS2	RGPS2_HUMAN Ras-specific guanine nucleotide-releasing factor RalGPS2	278	FVEDDNYKLSLKI	1000	R	K.FVEDDNY#K.L	1	1	20.4932	48.0122	59.2679	84.1436	18.491	80.7906	141.429	114.711	108.174	111.853	120.589	907.954	41.5406	77.0066	99.606	120.248	40.6984	137.715	195.542	147.14	132.778	111.853	111.038	1215.17	3.41851	6.33713	8.19691	9.89561	3.34921	11.3331	16.0918	12.1086	10.9267	9.20475	9.13769
2324	sp|P30085|KCY_HUMAN	CMPK1	KCY_HUMAN UMP-CMP kinase	49	KNPDSQYGELIEK	17.0091	R	K.NPDSQY#GELIEK.Y	1	1	20.4704	47.6732	48.3033	81.3845	22.4393	71.7425	106.387	105.924	136.74	109.885	127.837	878.785	41.4946	76.4628	81.1789	116.305	49.3885	122.292	147.093	135.868	167.841	109.885	117.713	1165.52	3.56017	6.5604	6.96503	9.97882	4.23746	10.4925	12.6203	11.6573	14.4005	9.42794	10.0996
1107	sp|P51149|RAB7A_HUMAN	RAB7A	RAB7A_HUMAN Ras-related protein Rab-7a	72	GQERFQSLGVAFY	71.7529	R	R.FQS#LGVAFYR.G	1	1	20.2592	19.2716	49.3974	85.9512	15.5492	145.884	221.233	94.0442	141.185	120.855	96.6591	1010.29	41.0663	30.9096	83.0176	122.831	34.2236	248.674	305.881	120.63	173.298	120.855	89.0037	1370.39	2.99669	2.25553	6.05795	8.96324	2.49736	18.1462	22.3207	8.80262	12.6459	8.81903	6.49477
2556	sp|O43491|E41L2_HUMAN	EPB41L2	E41L2_HUMAN Band 4.1-like protein 2	623	VEGDNIYVRHSNL	1000	R	R.VEGDNIY#VR.H	1	1	19.8877	58.3065	66.7113	89.3029	24.3689	48.1627	75.6284	98.8734	229.7	364.985	395.401	1471.33	40.3134	93.5175	112.116	127.621	53.6354	82.098	104.565	126.825	281.945	364.985	364.085	1751.71	2.30138	5.33866	6.40036	7.28554	3.0619	4.68675	5.96933	7.24007	16.0955	20.8359	20.7846
766	sp|Q16181|SEPT7_HUMAN	2017-09-07	SEPT7_HUMAN Septin-7	319	KLAAVTYNGVDNN	17.0091	R	K.LAAVTY#NGVDNNK.N	1	1	19.7678	24.1076	18.1911	27.4857	18.7443	19.5695	28.0558	29.6926	27.1961	30.5188	25.5608	268.89	40.0702	38.6661	30.5722	39.2793	41.2558	33.3582	38.7904	38.0867	33.3819	30.5188	23.5364	387.516	10.3403	9.97795	7.88927	10.1362	10.6462	8.60821	10.01	9.82842	8.61433	7.87549	6.07366
557	sp|P43003|EAA1_HUMAN	SLC1A3	EAA1_HUMAN Excitatory amino acid transporter 1	523	NEMKKPYQLIAQD	140.089	R	K.KPY#QLIAQDNETEKPIDSETK.M	1	1	19.6966	20.7125	25.0156	294.172	25.7929	27.847	27.388	180.582	63.9282	59.6941	350.753	1095.58	39.926	33.2207	42.0415	420.396	56.7698	47.468	37.8672	231.632	78.4687	59.6941	322.973	1370.46	2.91334	2.42406	3.0677	30.6756	4.1424	3.46366	2.7631	16.9018	5.72573	4.35578	23.5668
2623	sp|P62487|RPB7_HUMAN	POLR2G	RPB7_HUMAN DNA-directed RNA polymerase II subunit RPB7	17	ILLHPRYFGPNLL	27.1205	R	R.Y#FGPNLLNTVK.Q	1	1	19.5714	16.8306	16.0269	22.4192	19.3652	19.317	20.7005	16.1928	14.1113	14.7076	21.5492	200.792	39.6722	26.9945	26.9349	32.0388	42.6224	32.9278	28.6208	20.7705	17.321	14.7076	19.8425	302.453	13.1168	8.92518	8.90547	10.593	14.0922	10.8869	9.46291	6.86736	5.72683	4.86278	6.56053
482	sp|Q06124|PTN11_HUMAN	PTPN11	PTN11_HUMAN Tyrosine-protein phosphatase non-receptor type 11	546	KRKGHEYTNIKYS	30.8348	R	K.GHEY#TNIK.Y	1	1	19.5003	93.0727	81.472	68.7457	8.96127	18.195	25.8785	24.3256	105.668	112.107	71.4404	629.367	39.5279	149.279	136.923	98.2432	19.7236	31.0151	35.78	31.2025	129.702	112.107	65.7823	849.285	4.65426	17.577	16.1221	11.5678	2.32237	3.65191	4.21295	3.67397	15.2719	13.2002	7.74561
653	sp|Q13191|CBLB_HUMAN	CBLB	CBLB_HUMAN E3 ubiquitin-protein ligase CBL-B	763	IPDLSIYLKGDVF	31.2747	R	K.SNIPDLSIY#LK.G	2	1	19.2463	93.4956	103.539	61.1802	12.6965	44.4803	26.7992	23.169	82.3408	127.985	114.347	709.279	39.0132	149.957	174.008	87.4315	27.9448	75.8209	37.0531	29.7188	101.069	127.985	105.291	955.293	4.0839	15.6975	18.2152	9.15232	2.92526	7.93693	3.87871	3.11096	10.5799	13.3974	11.0219
319	sp|Q09666|AHNK_HUMAN	AHNAK	AHNK_HUMAN Neuroblast differentiation-associated protein AHNAK	160	TRRVTAYTVDVTG	17.0091	U	R.RVTAY#TVDVTGR.E	1	1	19.221	44.4836	34.2529	42.1106	19.2812	33.1116	33.1543	30.793	39.4275	53.8922	58.6523	408.38	38.9618	71.347	57.5657	60.1795	42.4376	56.442	45.8396	39.4981	48.3954	53.8922	54.007	568.566	6.85265	12.5486	10.1247	10.5844	7.46396	9.92707	8.06233	6.94696	8.51183	9.47862	9.49881
905	sp|P40763|STAT3_HUMAN	STAT3	STAT3_HUMAN Signal transducer and activator of transcription 3	727	TIDLPMSPRTLDS	29.3762	R	K.FICVTPTTCSNTIDLPM*S#PR.T	1	1	19.1534	19.7479	19.5919	18.4704	9.53152	20.6165	29.7296	23.2293	24.8941	25.2419	29.79	239.996	38.8248	31.6736	32.9262	26.3957	20.9787	35.1429	41.1046	29.7962	30.5562	25.2419	27.4306	340.072	11.4167	9.3138	9.68215	7.7618	6.16891	10.334	12.0871	8.76175	8.98524	7.42252	8.06613
1083	sp|Q99569|PKP4_HUMAN	PKP4	PKP4_HUMAN Plakophilin-4	1143	HSYEDPYFDDRVH	36.5564	R	R.LYLQSPHSYEDPY#FDDR.V	1	1	19.0747	22.2551	23.7742	24.7316	17.7396	28.4387	22.4194	30.9618	29.539	31.9511	30.1631	281.048	38.6653	35.6949	39.955	35.3435	39.0445	48.4765	30.9975	39.7147	36.2577	31.9511	27.7741	403.875	9.57359	8.83811	9.89293	8.75111	9.66748	12.0028	7.67502	9.83342	8.97745	7.91113	6.87692
2563	sp|Q5T5P2|SKT_HUMAN	KIAA1217	SKT_HUMAN Sickle tail protein homolog	244	DESRNVYYELNDV	30.8348	R	R.NVY#YELNDVR.N	1	1	19.0723	15.882	16.1618	26.7921	19.7099	15.6855	22.521	20.814	25.9317	28.405	29.0139	239.989	38.6604	25.473	27.1616	38.2881	43.3812	26.7375	31.1379	26.6981	31.8299	28.405	26.716	344.489	11.2225	7.39444	7.88461	11.1145	12.5929	7.7615	9.03888	7.75006	9.23975	8.24556	7.75526
2766	sp|P00491|PNPH_HUMAN	PNP	PNPH_HUMAN Purine nucleoside phosphorylase	249	NKVIMDYESLEKA	17.0091	U	K.VIMDY#ESLEK.A	1	1	18.8753	26.8551	30.8309	42.2807	12.315	34.2769	39.3134	50.488	40.0751	45.4892	57.9858	398.785	38.2612	43.0728	51.8146	60.4227	27.1051	58.4282	54.3554	64.7609	49.1903	45.4892	53.3933	546.294	7.00378	7.88455	9.48475	11.0605	4.96163	10.6954	9.94984	11.8546	9.00436	8.32688	9.77375
2803	sp|Q96RT1-8|LAP2_HUMAN	ERBB2IP	LAP2_HUMAN Isoform 8 of Protein LAP2	1104	QIPEGDYLSYREF	48.8739	R	R.AQIPEGDY#LSYR.E	1	1	18.8643	43.2253	34.2563	28.0839	19.0405	31.3617	30.1927	19.0771	48.2063	74.6379	56.4609	403.407	38.2388	69.3289	57.5714	40.1343	41.9079	53.459	41.7449	24.4702	59.1709	74.6379	51.9892	552.653	6.91913	12.5447	10.4173	7.2621	7.58304	9.67316	7.55354	4.42776	10.7067	13.5054	9.40721
2134	sp|P98077|SHC2_HUMAN	SHC2	SHC2_HUMAN SHC-transforming protein 2	398	APPGDGYVQADAR	24.2217	U	R.DACSLPWDVGSTGTAPPGDGY#VQADAR.G	1	1	18.8201	36.0262	40.5055	41.1342	17.1371	42.0065	50.5121	50.9665	43.0622	54.4948	55.5469	450.212	38.1492	57.7822	68.0738	58.7841	37.7185	71.6042	69.8389	65.3746	52.8567	54.4948	51.1476	625.825	6.09583	9.23297	10.8775	9.39307	6.02701	11.4416	11.1595	10.4461	8.44593	8.70767	8.17283
1492	sp|Q92974|ARHG2_HUMAN	ARHGEF2	ARHG2_HUMAN Rho guanine nucleotide exchange factor 2	125	RPSSAIYPSDSFR	20.1669	R	R.ERPSSAIY#PSDSFR.Q	1	1	18.5285	23.8902	21.6509	41.7789	13.6682	28.1464	35.3474	33.1182	63.6406	85.1935	100.599	465.562	37.5582	38.3174	36.3866	59.7054	30.0834	47.9783	48.8719	42.4807	78.1158	85.1935	92.6317	597.323	6.28776	6.41485	6.09162	9.9955	5.03637	8.03222	8.18182	7.11185	13.0776	14.2626	15.5078
2254	sp|Q15286|RAB35_HUMAN	RAB35	RAB35_HUMAN Ras-related protein Rab-35	5	xxMARDYDHLFKL	1000	R	R.DY#DHLFK.L	1	1	18.5073	36.0983	37.6168	70.4301	16.859	71.7299	120.926	116.83	151.1	177.454	223.186	1040.74	37.5152	57.8979	63.2191	100.65	37.1064	122.271	167.194	149.857	185.468	177.454	205.51	1304.14	2.87662	4.43953	4.84756	7.71774	2.84527	9.37555	12.8202	11.4909	14.2214	13.607	15.7582
716	sp|O75886|STAM2_HUMAN	STAM2	STAM2_HUMAN Signal transducing adapter molecule 2	374	APVYSVYSKLHPP	17.0091	U	K.LVNEAPVYSVY#SK.L	1	1	18.3909	43.5471	42.1045	110.619	16.2209	47.9132	44.7029	62.8599	92.7822	144.429	219.591	843.16	37.2791	69.845	70.7611	158.083	35.702	81.6728	61.807	80.6302	113.886	144.429	202.199	1056.29	3.52924	6.61227	6.699	14.9658	3.37993	7.73201	5.85131	7.63331	10.7816	13.6732	19.1423
2790	sp|Q6NZI2|PTRF_HUMAN	PTRF	PTRF_HUMAN Polymerase I and transcript release factor	156	NFKVMIYQDEVKL	1000	U	K.VM*IY#QDEVK.L	1	1	18.1811	31.7406	46.3791	58.8304	15.8078	42.35	59.5418	73.5674	65.203	66.588	116.571	594.761	36.8539	50.9086	77.945	84.0735	34.7926	72.1897	82.3235	94.3648	80.0334	66.588	107.339	787.412	4.68039	6.4653	9.89888	10.6772	4.4186	9.16797	10.4549	11.9842	10.1641	8.45657	13.6319
731	sp|O43707|ACTN4_HUMAN	ACTN4	ACTN4_HUMAN Alpha-actinin-4	265	TYVSSFYHAFSGA	18.6027	R	K.AIM*TYVSSFY#HAFSGAQK.A	1	1	17.9439	16.6106	17.2332	18.1257	16.9644	24.2904	32.6194	35.5647	18.2733	19.1129	29.1369	245.875	36.3732	26.6417	28.9622	25.9031	37.3383	41.4054	45.1001	45.6187	22.4296	19.1129	26.8292	355.715	10.2254	7.48963	8.14197	7.282	10.4967	11.6401	12.6787	12.8245	6.3055	5.3731	7.54235
1836	sp|P16144|ITB4_HUMAN	ITGB4	ITB4_HUMAN Integrin beta-4	1207	AQGEGPYSSLVSC	20.1669	R	K.VCAYGAQGEGPY#SSLVSCR.T	1	1	17.7052	21.2311	19.8157	23.5032	20.5294	19.8989	29.2598	21.582	23.3072	27.1884	37.4187	261.44	35.8893	34.0525	33.3024	33.588	45.1849	33.9197	40.4551	27.6831	28.6084	27.1884	34.4552	374.327	9.58768	9.09699	8.89661	8.9729	12.071	9.06151	10.8074	7.39544	7.64263	7.26327	9.20456
2776	sp|Q12965|MYO1E_HUMAN	MYO1E	MYO1E_HUMAN Unconventional myosin-Ie	974	RNQYVPYPHAPGS	23.6238	U	R.NQYVPY#PHAPGSQR.S	1	1	17.3618	18.0062	18.2042	19.9446	15.246	16.3798	20.0754	20.1717	22.8295	23.449	26.2511	217.919	35.1931	28.8801	30.5942	28.5024	33.5562	27.921	27.7566	25.8742	28.0221	23.449	24.172	313.921	11.2108	9.19979	9.74581	9.07949	10.6894	8.89427	8.84192	8.24227	8.92649	7.4697	7.70003
2678	sp|Q9H8Y8|GORS2_HUMAN	GORASP2	GORS2_HUMAN Golgi reassembly-stacking protein 2	222	PGQMAGTPITPLK	23.6238	R	K.ISLPGQM*AGT#PITPLK.D	1	1	17.1744	11.1596	16.5713	29.7537	15.1888	19.019	24.1798	72.5133	39.3454	51.7113	80.4871	377.104	34.8134	17.8989	27.8498	42.5205	33.4302	32.4197	33.4315	93.0127	48.2946	51.7113	74.1125	489.495	7.1121	3.6566	5.68949	8.68662	6.82953	6.62308	6.82978	19.0018	9.8662	10.5642	15.1406
551	sp|P42685|FRK_HUMAN	FRK	FRK_HUMAN Tyrosine-protein kinase FRK	99	SQQLQGYIPSNYV	71.9493	U	R.DGSSQQLQGY#IPSNYVAEDR.S	1	1	17.026	27.5347	28.8564	30.2806	15.2231	33.8078	34.0604	47.7621	54.094	63.723	65.8397	418.208	34.5125	44.1628	48.4963	43.2735	33.5058	57.6286	47.0925	61.2644	66.3977	63.723	60.6252	560.682	6.15545	7.87661	8.64951	7.718	5.97589	10.2783	8.39915	10.9268	11.8423	11.3653	10.8128
449	sp|P18433|PTPRA_HUMAN	PTPRA	PTPRA_HUMAN Receptor-type tyrosine-protein phosphatase alpha	271	NKEKNRYVNILPY	62.6585	R	R.Y#VNILPYDHSR.V	1	1	16.8681	14.3122	19.261	27.3658	19.8768	20.9773	32.1426	30.672	23.9558	28.0212	30.8945	264.347	34.1924	22.9552	32.3702	39.108	43.7485	35.7579	44.4408	39.3429	29.4046	28.0212	28.4476	377.789	9.05066	6.0762	8.56832	10.3518	11.5801	9.46504	11.7634	10.414	7.78333	7.41714	7.53002
2185	sp|Q5T0N5|FBP1L_HUMAN	FNBP1L	FBP1L_HUMAN Formin-binding protein 1-like	566	KEGEVLYIIEEDK	1000	R	K.EGEVLY#IIEEDK.G	1	1	16.84	21.6954	16.8338	71.7325	14.1255	42.7516	72.3595	147.744	49.3179	62.573	112.264	628.237	34.1355	34.7972	28.291	102.512	31.0899	72.8743	100.045	189.511	60.5354	62.573	103.372	819.737	4.16421	4.24492	3.45123	12.5054	3.79267	8.88997	12.2046	23.1185	7.38473	7.6333	12.6104
553	sp|P42685|FRK_HUMAN	FRK	FRK_HUMAN Tyrosine-protein kinase FRK	193	NEFVSHYTKTSDG	30.8348	R	R.IFSTLNEFVSHY#TK.T	1	1	16.7156	22.4841	27.7335	19.1892	16.3001	26.2008	28.2994	24.6995	24.1253	36.3402	25.9978	268.086	33.8833	36.0622	46.6091	27.4229	35.8762	44.6619	39.1273	31.6821	29.6127	36.3402	23.9388	385.217	8.7959	9.36154	12.0995	7.11884	9.31325	11.594	10.1572	8.22448	7.68728	9.43371	6.21436
1298	sp|Q5JRA6|MIA3_HUMAN	MIA3	MIA3_HUMAN Melanoma inhibitory activity protein 3	1678	VSGGECSPPLTVE	23.6238	R	R.RGPLSQNGSFGPSPVSGGECS#PPLTVEPPVRPLSATLNR.R	1	1	16.4418	16.1369	21.9334	17.5285	19.6082	20.745	22.5583	24.4496	10.9507	15.7598	15.0533	201.165	33.3283	25.882	36.8614	25.0496	43.1574	35.3619	31.1894	31.3614	13.4415	15.7598	13.8611	305.254	10.9182	8.47883	12.0757	8.20617	14.1382	11.5844	10.2175	10.2739	4.40337	5.16284	4.54084
1258	sp|P35222|CTNB1_HUMAN	CTNNB1	CTNB1_HUMAN Catenin beta-1	675	DYKKRLSVELTSS	36.5564	R	K.RLS#VELTSSLFR.T	1	1	16.4345	20.5003	20.0873	20.9636	21.6411	27.4996	41.6645	29.522	30.5199	31.5036	37.6594	297.996	33.3134	32.8803	33.7588	29.9588	47.6316	46.8757	57.6061	37.8678	37.4617	31.5036	34.6768	423.535	7.86558	7.7633	7.97073	7.07351	11.2462	11.0677	13.6013	8.94089	8.84502	7.43827	8.18748
1020	sp|Q14247|SRC8_HUMAN	CTTN	SRC8_HUMAN Src substrate cortactin	446	TEPEPVYSMEAAD	27.0548	R	R.GPVSGTEPEPVY#SM*EAADYR.E	1	1	16.2835	21.459	14.3219	16.9735	18.9736	14.8607	17.5364	14.1021	19.3515	23.3574	27.6669	204.887	33.0074	34.4181	24.0695	24.2566	41.7606	25.3314	24.2461	18.0887	23.753	23.3574	25.4757	297.765	11.0851	11.5588	8.08341	8.14622	14.0247	8.50721	8.14271	6.07483	7.97711	7.84425	8.55566
869	sp|Q07912|ACK1_HUMAN	TNK2	ACK1_HUMAN Activated CDC42 kinase 1	859	KVSSTHYYLLPER	17.0091	R	K.VSSTHY#YLLPERPSYLER.Y	1	1	16.2524	31.2307	32.5868	34.0104	16.3453	32.9463	39.3605	43.4561	36.0933	37.3321	49.3207	368.935	32.9444	50.0908	54.7656	48.6037	35.9757	56.1601	54.4205	55.7411	44.3028	37.3321	45.4145	515.751	6.38765	9.7122	10.6186	9.42387	6.9754	10.889	10.5517	10.8077	8.58995	7.2384	8.80551
1769	sp|Q15149|PLEC_HUMAN	PLEC	PLEC_HUMAN Plectin	4642	AGSRRGSFDATGS	16.144	R	R.RGS#FDATGSGFSMTFSSSSYSSSGYGR.R	1	1	16.1166	19.7483	28.2689	22.0364	13.121	27.9785	23.006	23.5417	33.3575	35.0257	40.8588	283.059	32.6691	31.6742	47.5089	31.4918	28.8791	47.692	31.8085	30.1969	40.9447	35.0257	37.6228	395.514	8.2599	8.00836	12.0119	7.96226	7.30167	12.0582	8.04233	7.63487	10.3523	8.85576	9.51238
684	sp|P19174-2|PLCG1_HUMAN	PLCG1	PLCG1_HUMAN Isoform 2 of 1-phosphatidylinositol 4,5-bisphosphate phosphodiesterase gamma-1	771	GTAEPDYGALYEG	44.2778	R	K.IGTAEPDY#GALYEGR.N	1	1	15.8164	82.5163	52.7717	34.3125	14.6327	31.603	36.9984	42.3149	73.8863	158.382	106.441	649.675	32.0606	132.347	88.6885	49.0354	32.2064	53.8704	51.1546	54.2773	90.6919	158.382	98.0104	840.725	3.81345	15.7421	10.5491	5.83252	3.83079	6.40762	6.08458	6.45601	10.7873	18.8387	11.6578
1086	sp|Q99569|PKP4_HUMAN	PKP4	PKP4_HUMAN Plakophilin-4	1115	LQHQQLYYSQDDS	17.0091	R	R.LQHQQLY#YSQDDSNR.K	1	1	15.734	20.23	11.0929	28.3342	19.2115	23.0506	33.5505	27.5915	20.3313	21.7237	14.0805	234.931	31.8935	32.4468	18.6428	40.492	42.2842	39.2921	46.3875	35.3915	24.9557	21.7237	12.9653	346.475	9.20515	9.36484	5.38069	11.6868	12.2041	11.3405	13.3884	10.2147	7.20273	6.26991	3.74207
2858	sp|Q15907|RB11B_HUMAN	RAB11B	RB11B_HUMAN Ras-related protein Rab-11B	8	GTRDDEYDYLFKV	17.0091	R	R.DDEY#DYLFK.V	1	1	15.7106	19.7472	20.1739	24.3675	18.9247	23.8375	26.8707	29.3222	28.3111	32.3624	38.8537	278.482	31.8462	31.6725	33.9044	34.8232	41.6528	40.6333	37.1519	37.6115	34.7505	32.3624	35.7764	392.185	8.12019	8.0759	8.64499	8.87928	10.6207	10.3608	9.47305	9.59025	8.86073	8.25182	9.12233
398	sp|Q15019-2|SEPT2_HUMAN	2017-09-02	SEPT2_HUMAN Isoform 2 of Septin-2	52	NPETPGYVGFANL	57.7111	R	K.QQPTQFINPETPGY#VGFANLPNQVHR.K	3	1	15.672	33.0002	30.2469	35.7087	18.969	26.8749	29.1135	30.3696	40.9499	51.7045	67.0303	379.64	31.7679	52.9288	50.8332	51.0307	41.7504	45.811	40.2528	38.9551	50.264	51.7045	61.7215	517.02	6.14442	10.2373	9.83196	9.87016	8.07521	8.86058	7.78554	7.53454	9.72187	10.0005	11.9379
1318	sp|Q86X29|LSR_HUMAN	LSR	LSR_HUMAN Lipolysis-stimulated lipoprotein receptor	615	EEEEEAYYPPAPP	48.8739	R	K.EEEEEAY#YPPAPPPYSETDSQASR.E	1	1	15.5887	30.4595	29.8288	22.8256	8.01078	22.2959	21.2143	18.1449	48.7292	71.1356	63.129	351.362	31.599	48.8539	50.1305	32.6196	17.6316	38.0056	29.3312	23.2744	59.8127	71.1356	58.1291	460.523	6.86154	10.6083	10.8856	7.08317	3.8286	8.2527	6.36911	5.0539	12.988	15.4467	12.6224
1125	sp|Q9Y6I3-1|EPN1_HUMAN	EPN1	EPN1_HUMAN Isoform 2 of Epsin-1	128	KNIVHNYSEAEIK	30.8348	R	K.NIVHNY#SEAEIK.V	1	1	15.5777	17.2524	35.8287	241.273	21.4793	58.7577	108.678	204.61	100.559	147.229	309.273	1260.52	31.5767	27.6711	60.214	344.799	47.2756	100.158	150.26	262.453	123.431	147.229	284.778	1579.85	1.99872	1.75151	3.81139	21.8248	2.99242	6.33974	9.51107	16.6126	7.81287	9.31918	18.0257
1837	sp|P16144|ITB4_HUMAN	ITGB4	ITB4_HUMAN Integrin beta-4	1474	AYGTHLSPHVPHR	15.0073	R	R.M*TTTSAAAYGTHLS#PHVPHR.V	1	1	15.5336	21.7197	25.4149	35.0941	19.2756	22.0244	25.6009	22.4237	23.8286	30.9623	41.7388	283.617	31.4872	34.8362	42.7125	50.1524	42.4252	37.5428	35.3962	28.7629	29.2484	30.9623	38.4331	401.959	7.83344	8.6666	10.6261	12.477	10.5546	9.33996	8.80591	7.15567	7.27647	7.70284	9.56145
1851	sp|O43390-2|HNRPR_HUMAN	HNRNPR	HNRPR_HUMAN Isoform 2 of Heterogeneous nuclear ribonucleoprotein R	437	STAYEDYYYHPPP	30.8348	R	R.STAYEDY#YYHPPPR.M	1	1	15.3232	18.22	21.7441	15.951	12.7382	22.7154	26.4189	21.485	30.2245	31.6849	32.3585	248.864	31.0608	29.2229	36.5433	22.7953	28.0365	38.7207	36.5272	27.5587	37.0991	31.6849	29.7957	349.045	8.89881	8.37224	10.4695	6.53076	8.03234	11.0933	10.4649	7.89546	10.6287	9.07759	8.53635
540	sp|P22626|ROA2_HUMAN	HNRNPA2B1	ROA2_HUMAN Heterogeneous nuclear ribonucleoproteins A2/B1	336	PYGGGNYGPGGSG	60.3582	R	R.NM*GGPYGGGNY#GPGGSGGSGGYGGR.S	2	1	15.2937	18.8489	14.9135	12.03	23.3172	16.6216	22.7407	19.247	24.4862	34.782	42.7922	245.073	31.0011	30.2317	25.0637	17.1919	51.3207	28.3331	31.4416	24.688	30.0556	34.782	39.403	343.513	9.02472	8.80076	7.29631	5.00475	14.94	8.24804	9.15297	7.18694	8.74949	10.1254	11.4706
1082	sp|Q99569|PKP4_HUMAN	PKP4	PKP4_HUMAN Plakophilin-4	372	QQQYDIYERMVPP	47.8083	R	R.TVHDMEQFGQQQYDIY#ER.M	1	1	15.1452	13.5144	21.9244	21.6312	13.2595	24.0905	22.3731	23.9665	19.0564	21.8275	23.8726	220.661	30.7	21.6757	36.8464	30.9128	29.1838	41.0646	30.9335	30.7417	23.3908	21.8275	21.9819	319.259	9.61603	6.78939	11.5412	9.68269	9.14112	12.8625	9.68915	9.62909	7.3266	6.83693	6.88528
831	sp|P41567|EIF1_HUMAN	EIF1	EIF1_HUMAN Eukaryotic translation initiation factor 1	79	VIEHPEYGEVIQL	91.9001	R	K.FACNGTVIEHPEY#GEVIQLQGDQR.K	1	1	14.9083	20.3059	22.8187	30.2564	17.1759	34.403	45.6455	57.6555	31.3261	37.0449	45.5802	357.12	30.2199	32.5685	38.3492	43.2389	37.8038	58.6433	63.1103	73.9545	38.4513	37.0449	41.9703	495.355	6.10065	6.57478	7.74177	8.72887	7.63167	11.8386	12.7404	14.9296	7.76237	7.47846	8.47277
488	sp|P62993|GRB2_HUMAN	GRB2	GRB2_HUMAN Growth factor receptor-bound protein 2	209	GMFPRNYVTPVNR	30.8348	R	R.NY#VTPVNR.N	1	1	14.8673	71.9316	94.9468	119.495	16.7453	153.999	138.523	109.219	267.548	236.051	238.876	1462.2	30.1366	115.371	159.568	170.768	36.8561	262.506	191.525	140.096	328.403	236.051	219.957	1891.24	1.59349	6.10028	8.43724	9.02943	1.94878	13.8801	10.1269	7.40762	17.3644	12.4813	11.6303
1190	sp|Q9UJ41|RABX5_HUMAN	RABGEF1	RABX5_HUMAN Rab5 GDP/GTP exchange factor	673	QDIVEKYPLEIKP	123.671	R	K.Y#PLEIKPPNQPLAAIDSENVENDK.L	2	2	14.822	22.0607	30.6335	131.9	15.3935	36.6581	52.4968	107.08	55.7747	67.9303	159.02	693.77	30.0449	35.3831	51.483	188.496	33.8809	62.4873	72.583	137.351	68.4607	67.9303	146.426	894.526	3.35875	3.95551	5.75533	21.0722	3.78758	6.98552	8.11413	15.3546	7.6533	7.594	16.3691
2521	sp|Q9UHR4|BI2L1_HUMAN	BAIAP2L1	BI2L1_HUMAN Brain-specific angiogenesis inhibitor 1-associated protein 2-like protein 1	163	EHKEIEYVETVTS	53.5337	U	K.EIEY#VETVTSR.Q	1	1	14.8139	24.2428	23.4856	26.7588	15.6246	26.5618	34.5227	27.665	37.2549	49.4772	40.5196	320.927	30.0285	38.8829	39.4701	38.2406	34.3894	45.2772	47.7316	35.4859	45.7286	49.4772	37.3105	442.022	6.79343	8.79659	8.92944	8.65127	7.78001	10.2432	10.7985	8.02807	10.3453	11.1934	8.44086
544	sp|P22626|ROA2_HUMAN	HNRNPA2B1	ROA2_HUMAN Heterogeneous nuclear ribonucleoproteins A2/B1	131	EHHLRDYFEEYGK	20.9846	R	K.EDTEEHHLRDY#FEEYGK.I	1	1	14.574	31.9593	46.0307	112.319	17.9297	86.0844	177.093	216.02	88.8058	95.4668	115.71	1001.99	29.5423	51.2594	77.3595	160.512	39.463	146.739	244.852	277.089	109.005	95.4668	106.546	1337.83	2.20821	3.83152	5.78244	11.9979	2.94977	10.9684	18.3021	20.7118	8.14785	7.13592	7.96405
2866	sp|P33552|CKS2_HUMAN	CKS2	CKS2_HUMAN Cyclin-dependent kinases regulatory subunit 2	17	KYFDEHYEYRHVM	17.0091	U	K.YFDEHY#EYR.H	1	1	14.3926	13.9737	19.9844	32.7622	14.807	28.1641	36.7215	34.8624	25.2548	22.8351	35.7536	279.511	29.1745	22.4123	33.5859	46.8198	32.5899	48.0085	50.7717	44.718	30.999	22.8351	32.9219	394.837	7.38901	5.67634	8.50627	11.858	8.25403	12.1591	12.8589	11.3257	7.8511	5.78343	8.33811
2220	sp|Q5T2T1|MPP7_HUMAN	MPP7	MPP7_HUMAN MAGUK p55 subfamily member 7	417	ESDGVEYIFISKH	26.9265	R	R.SQESDGVEY#IFISK.H	1	1	14.3049	16.6844	15.1838	28.0516	19.3839	23.5158	35.507	91.0046	31.5894	31.6924	44.2892	351.207	28.9966	26.7601	25.518	40.088	42.6637	40.085	49.0926	116.731	38.7745	31.6924	40.7815	481.184	6.0261	5.56131	5.30318	8.33111	8.86641	8.3305	10.2025	24.2592	8.05814	6.58635	8.47524
1491	sp|Q96C90|PP14B_HUMAN	PPP1R14B	PP14B_HUMAN Protein phosphatase 1 regulatory subunit 14B	29	GPGPRVYFQSPPG	17.2497	U	R.VY#FQSPPGAAGEGPGGADDEGPVRR.Q	1	1	14.2064	23.633	18.8729	29.8394	12.5849	21.8236	29.2603	25.3264	25.8457	30.7124	38.7985	270.903	28.7971	37.9049	31.718	42.6429	27.6992	37.2004	40.4557	32.4861	31.7243	30.7124	35.7257	377.067	7.63713	10.0526	8.41177	11.3091	7.34596	9.86573	10.7291	8.61549	8.41345	8.14508	9.47463
864	sp|Q9NUE0|ZDH18_HUMAN	ZDHHC18	ZDH18_HUMAN Palmitoyltransferase ZDHHC18	6	xMKDCEYQQISPG	47.0452	U	K.DCEY#QQISPGAAPLPASPGAR.R	1	1	14.0449	22.4863	22.2478	15.4831	10.7101	9.29166	15.807	19.9288	23.526	33.4506	26.5465	213.523	28.4696	36.0657	37.3898	22.1266	23.5728	15.8385	21.8551	25.5627	28.877	33.4506	24.444	297.652	9.56472	12.1167	12.5616	7.4337	7.91958	5.32115	7.34248	8.58809	9.70159	11.2382	8.21228
1718	sp|Q9H792|PEAK1_HUMAN	PEAK1	PEAK1_HUMAN Pseudopodium-enriched atypical kinase 1	531	KSSAIRYQEVWTS	65.4396	R	R.Y#QEVWTSSTSPR.Q	1	1	13.9507	13.298	19.2021	19.1447	20.8977	28.6771	25.2876	32.6387	27.4486	32.5252	29.542	262.612	28.2786	21.3286	32.2712	27.3594	45.9955	48.8829	34.9631	41.8656	33.6918	32.5252	27.2022	374.364	7.55378	5.6973	8.62027	7.30823	12.2863	13.0576	9.33933	11.1831	8.99975	8.68812	7.26625
2353	sp|Q15642|CIP4_HUMAN	TRIP10	CIP4_HUMAN Cdc42-interacting protein 4	590	KEGGEGYVPTSYL	24.2431	R	K.EGGEGY#VPTSYLR.V	1	1	13.8947	15.8736	22.9831	35.0582	16.4202	30.2919	46.4334	36.3261	28.7132	41.0936	39.1702	326.258	28.1653	25.4597	38.6256	50.1011	36.1407	51.6355	64.1997	46.5954	35.244	41.0936	36.0679	453.328	6.21299	5.61617	8.52045	11.0518	7.97229	11.3903	14.1618	10.2785	7.7745	9.06486	7.95625
2025	sp|P67870|CSK2B_HUMAN	CSNK2B	CSK2B_HUMAN Casein kinase II subunit beta	209	AASNFKSPVKTIR	40.3622	R	K.IHPMAYQLQLQAASNFKS#PVK.T	1	1	13.7874	13.1479	16.1065	18.3442	21.7532	16.1006	25.1086	25.4908	16.1959	19.8993	17.3972	203.332	27.9477	21.0879	27.0687	26.2154	47.8785	27.445	34.7156	32.697	19.8797	19.8993	16.0194	300.854	9.28945	7.00935	8.99729	8.71365	15.9142	9.12237	11.539	10.868	6.60775	6.61427	5.32463
682	sp|P19174-2|PLCG1_HUMAN	PLCG1	PLCG1_HUMAN Isoform 2 of 1-phosphatidylinositol 4,5-bisphosphate phosphodiesterase gamma-1	1254	GSFESRYQQPFED	1000	R	R.Y#QQPFEDFR.I	1	1	13.7576	116.869	66.7367	52.3436	9.00907	45.6825	42.0639	51.3189	99.0384	240.341	143.715	880.875	27.8874	187.445	112.158	74.8033	19.8288	77.8703	58.1583	65.8267	121.565	240.341	132.333	1118.22	2.49391	16.7629	10.0301	6.68952	1.77325	6.96379	5.20098	5.88675	10.8713	21.4932	11.8343
2022	sp|Q9C0B5|ZDHC5_HUMAN	ZDHHC5	ZDHC5_HUMAN Palmitoyltransferase ZDHHC5	630	PGPTAPYLGRSMS	37.5398	R	R.GVGSPEPGPTAPY#LGR.S	2	1	13.7398	18.7902	21.2129	24.1316	14.7846	19.7146	27.2703	25.1482	27.4428	30.4355	34.7721	257.443	27.8513	30.1375	35.6505	34.486	32.5406	33.6054	37.7044	32.2576	33.6847	30.4355	32.0182	360.372	7.7285	8.36288	9.8927	9.56958	9.02973	9.32522	10.4626	8.9512	9.3472	8.44558	8.88476
1378	sp|Q86VI3|IQGA3_HUMAN	IQGAP3	IQGA3_HUMAN Ras GTPase-activating-like protein IQGAP3	1098	QRSHLPYDVTPEQ	25.1744	R	R.SHLPY#DVTPEQALSHPEVQR.R	1	1	13.342	21.7721	18.7711	27.6341	14.6819	19.1043	25.6873	29.6172	30.7156	36.7258	37.0983	275.15	27.0449	34.9202	31.5469	39.4914	32.3146	32.5652	35.5156	37.9899	37.7019	36.7258	34.1601	379.977	7.11751	9.19009	8.30233	10.3931	8.50437	8.57031	9.3468	9.99795	9.92217	9.66529	8.99006
1119	sp|P01130|LDLR_HUMAN	LDLR	LDLR_HUMAN Low-density lipoprotein receptor	828	NFDNPVYQKTTED	26.0454	R	K.NINSINFDNPVY#QK.T	1	1	13.2089	17.4772	12.4034	17.4487	13.0496	19.3799	20.7554	20.3977	24.7339	34.1731	34.9096	227.937	26.7751	28.0317	20.8453	24.9356	28.722	33.035	28.6968	26.1641	30.3596	34.1731	32.1447	313.883	8.53029	8.93061	6.64109	7.94422	9.15054	10.5246	9.14251	8.33563	9.67228	10.8872	10.241
745	sp|Q9Y450|HBS1L_HUMAN	HBS1L	HBS1L_HUMAN HBS1-like protein	58	PVEEYDYEDLKES	31.2747	R	R.DKPSVEPVEEYDY#EDLK.E	1	1	13.1778	30.0407	23.3414	28.5345	11.9527	18.684	22.8835	17.4082	32.3999	47.9158	39.2252	285.564	26.712	48.1821	39.2276	40.7781	26.3077	31.8486	31.6392	22.3295	39.7693	47.9158	36.1186	390.828	6.8347	12.3282	10.0371	10.4338	6.73127	8.14901	8.09541	5.71336	10.1756	12.2601	9.24154
1195	sp|P48729-2|KC1A_HUMAN	CSNK1A1	KC1A_HUMAN Isoform 2 of Casein kinase I isoform alpha	322	LNHQYDYTFDWTM	17.0091	R	R.TLNHQYDY#TFDWTMLK.Q	1	1	13.1102	8.06216	15.1087	46.6107	8.68899	17.5653	30.5439	105.084	19.4502	21.2902	65.1674	350.682	26.5751	12.9309	25.3918	66.6105	19.1243	29.9418	42.2305	134.791	23.8742	21.2902	60.0061	462.767	5.74265	2.79425	5.48695	14.394	4.1326	6.47017	9.12567	29.1273	5.15902	4.60063	12.9668
2321	sp|Q5T0Z8|CF132_HUMAN	C6orf132	CF132_HUMAN Uncharacterized protein C6orf132	1142	APGSADYGFAPAA	73.3109	U	K.APGSADY#GFAPAAGR.S	1	1	13.1095	21.4885	18.1817	18.0241	10.2959	15.381	19.8427	18.4091	20.5081	28.3566	26.6037	210.201	26.5736	34.4653	30.5563	25.758	22.6612	26.2183	27.4348	23.6133	25.1727	28.3566	24.4967	295.307	8.99865	11.671	10.3473	8.72245	7.67377	8.87834	9.29027	7.99619	8.52425	9.60241	8.29534
1415	sp|Q9UQC2|GAB2_HUMAN	GAB2	GAB2_HUMAN GRB2-associated-binding protein 2	293	TDNEDVYTFKTPS	17.0091	R	K.GSLTGSETDNEDVY#TFK.T	1	1	13.0954	16.7405	18.0618	22.554	17.1963	17.7404	17.036	26.5694	19.809	29.1877	27.7267	225.717	26.5451	26.85	30.3548	32.2316	37.8488	30.2402	23.5542	34.0805	24.3146	29.1877	25.5307	320.738	8.27625	8.37132	9.46404	10.0492	11.8005	9.42831	7.34376	10.6256	7.58082	9.10017	7.95999
2367	tr|Q5JVM0|Q5JVM0_HUMAN	MYO6	Q5JVM0_HUMAN Unconventional myosin-VI (Fragment)	103	LRSLDSYPVTSKN	24.437	U	R.SLDSY#PVTSK.N	1	1	12.9993	33.8414	39.9198	48.1582	16.8028	50.5767	72.9746	71.9787	338.199	420.308	422.418	1528.18	26.3501	54.278	67.0896	68.8221	36.9826	86.2129	100.896	92.3269	415.122	420.308	388.962	1757.35	1.49942	3.08863	3.81765	3.91624	2.10445	4.90585	5.74136	5.25375	23.622	23.9171	22.1335
1011	sp|Q16644|MAPK3_HUMAN	MAPKAPK3	MAPK3_HUMAN MAP kinase-activated protein kinase 3	207	TPCYTPYYVAPEV	15.0073	R	K.ETTQNALQTPCYTPY#YVAPEVLGPEK.Y	1	1	12.9711	37.5019	40.1731	40.8099	11.7624	35.5446	26.0145	28.2246	40.7317	64.3355	90.7459	428.815	26.293	60.1491	67.5153	58.3207	25.8888	60.5893	35.9681	36.2037	49.9962	64.3355	83.5588	568.818	4.6224	10.5744	11.8694	10.2529	4.55133	10.6518	6.3233	6.36471	8.78948	11.3104	14.6899
1257	sp|P35222|CTNB1_HUMAN	CTNNB1	CTNB1_HUMAN Catenin beta-1	142	VVNLINYQDDAEL	75.7382	R	K.HAVVNLINY#QDDAELATR.A	1	1	12.8272	18.4	18.2907	24.3988	8.00741	15.2599	21.039	15.205	23.8413	29.9356	31.713	218.918	26.0013	29.5116	30.7394	34.8679	17.6242	26.0121	29.0889	19.5034	29.264	29.9356	29.2013	301.75	8.61684	9.78017	10.1871	11.5552	5.84066	8.62041	9.64006	6.46343	9.6981	9.92069	9.67732
1273	sp|Q70EL4|UBP43_HUMAN	USP43	UBP43_HUMAN Ubiquitin carboxyl-terminal hydrolase 43	835	SVELVEYLESRRR	20.1669	R	K.EKPPGASVELVEY#LESR.R	1	1	12.728	20.5171	19.2313	28.6472	11.1004	22.0584	38.7801	26.5301	44.5494	55.3419	51.4042	330.888	25.8003	32.9073	32.3203	40.9392	24.4317	37.6006	53.618	34.0301	54.6822	55.3419	47.3329	439.005	5.87701	7.49589	7.36217	9.32546	5.56525	8.56497	12.2135	7.75165	12.456	12.6062	10.7819
365	sp|P00533|EGFR_HUMAN	EGFR	EGFR_HUMAN Epidermal growth factor receptor	693	ELVEPLTPSGEAP	20.1669	R	R.ELVEPLT#PSGEAPNQALLR.I	1	1	12.6142	16.9142	22.0092	27.1355	9.53577	17.3398	33.0542	22.5181	21.9316	30.7679	32.3901	246.211	25.5696	27.1287	36.9889	38.7789	20.9881	29.5574	45.7013	28.884	26.92	30.7679	29.8248	341.11	7.49602	7.95307	10.8437	11.3685	6.15288	8.66507	13.3978	8.46766	7.89189	9.01994	8.74347
1520	sp|O43609|SPY1_HUMAN	SPRY1	SPY1_HUMAN Protein sprouty homolog 1	89	INVNNNYEHRHTS	110.838	R	R.THEIIPINVNNNY#EHR.H	1	1	12.5678	17.7966	12.2133	27.3572	12.182	15.7316	20.0185	21.7048	27.5911	22.1487	28.099	217.411	25.4755	28.5438	20.5258	39.0957	26.8123	26.8161	27.6779	27.8407	33.8668	22.1487	25.8735	304.677	8.36149	9.36856	6.73689	12.8319	8.80025	8.80149	9.08434	9.13779	11.1156	7.26958	8.49211
2762	sp|Q6IA17|SIGIR_HUMAN	SIGIRR	SIGIR_HUMAN Single Ig IL-1-related receptor	402	SARTDFYCLVSKD	53.5337	R	R.TDFY#CLVSK.D	1	1	12.0758	19.453	14.3605	25.3743	13.5735	18.1007	19.0524	25.2638	31.1657	41.1435	39.7699	259.333	24.4782	31.2007	24.1344	36.2619	29.8751	30.8544	26.3422	32.4059	38.2544	41.1435	36.6202	351.571	6.96252	8.87464	6.86474	10.3143	8.4976	8.77615	7.49272	9.21745	10.881	11.7028	10.4162
1881	sp|Q9NUM4|T106B_HUMAN	TMEM106B	T106B_HUMAN Transmembrane protein 106B	50	DVSQFPYVEFTGR	44.2778	R	R.NGDVSQFPY#VEFTGR.D	1	1	12.0042	22.2126	28.9066	29.4878	12.8593	16.0039	21.4972	28.1811	26.7909	27.9583	36.8799	262.781	24.333	35.6267	48.5806	42.1405	28.303	27.2802	29.7224	36.1478	32.8845	27.9583	33.959	366.936	6.6314	9.70924	13.2395	11.4844	7.71335	7.43458	8.10015	9.85126	8.96191	7.6194	9.25475
408	sp|P16885|PLCG2_HUMAN	PLCG2	PLCG2_HUMAN 1-phosphatidylinositol 4,5-bisphosphate phosphodiesterase gamma-2	1245	ENQLQLYQEKCNK	80.7549	U	K.EFSVNENQLQLY#QEK.C	1	1	11.9833	27.1929	22.4472	28.7178	12.8958	25.8626	25.5544	20.541	29.191	41.6764	48.6601	294.723	24.2907	43.6146	37.7249	41.04	28.3833	44.0853	35.332	26.3479	35.8306	41.6764	44.8062	403.132	6.0255	10.8189	9.35796	10.1803	7.0407	10.9357	8.76436	6.53581	8.88805	10.3382	11.1145
1118	sp|Q15365|PCBP1_HUMAN	PCBP1	PCBP1_HUMAN Poly(rC)-binding protein 1	211	AGYPHATHDLEGP	23.6238	U	R.CSDAAGYPHAT#HDLEGPPLDAYSIQGQHTISPLDLAK.L	1	1	11.9303	8.40055	13.7091	14.1966	8.62952	16.9673	19.6636	19.7549	23.3931	38.4397	43.0523	218.137	24.1832	13.4736	23.0397	20.2881	18.9934	28.9225	27.1872	25.3396	28.7139	38.4397	39.6425	288.223	8.39043	4.67471	7.99369	7.03901	6.58982	10.0347	9.43267	8.79166	9.96238	13.3368	13.7541
7	sp|O60716|CTND1_HUMAN	CTNND1	CTND1_HUMAN Catenin delta-1	174	SSVSNNYIQTLGR	55.37	R	R.TVQPVAM*GPDGLPVDASSVSNNY#IQTLGR.D	2	1	11.7215	36.6322	33.9153	28.4622	6.35134	22.4596	21.7756	20.0013	65.301	122.928	98.5725	468.121	23.7601	58.7542	56.9983	40.6749	13.9792	38.2846	30.1073	25.6556	80.1537	122.928	90.7656	582.062	4.08206	10.0941	9.79248	6.98806	2.40167	6.57741	5.17253	4.40772	13.7707	21.1195	15.5938
1080	sp|Q96DM3|MIC1_HUMAN	C18orf8	MIC1_HUMAN Uncharacterized protein C18orf8	430	LDAEQSYAMAVEA	17.0091	R	K.YLDAEQSY#AMAVEAGQSR.S	1	1	11.6193	11.015	13.2846	26.9398	9.82575	14.1594	22.7731	27.8557	26.9881	27.1344	49.4402	241.035	23.5528	17.667	22.3262	38.4992	21.6263	24.136	31.4865	35.7305	33.1266	27.1344	45.5245	320.81	7.34167	5.50699	6.95932	12.0006	6.74116	7.52347	9.81469	11.1376	10.3259	8.4581	14.1905
458	sp|Q08174-2|PCDH1_HUMAN	PCDH1	PCDH1_HUMAN Isoform 2 of Protocadherin-1	962	LNYPPGSPDLGRH	47.0452	R	R.IHLPLNYPPGS#PDLGR.H	1	1	11.2486	17.1353	11.0361	19.2341	13.7579	15.2246	14.3441	24.2168	26.0897	24.7352	32.8836	209.906	22.8015	27.4833	18.5473	27.487	30.2808	25.9518	19.8324	31.0628	32.0238	24.7352	30.2792	290.485	7.84944	9.46116	6.38495	9.46245	10.4242	8.93396	6.82735	10.6934	11.0242	8.51514	10.4237
2107	sp|O14964|HGS_HUMAN	HGS	HGS_HUMAN Hepatocyte growth factor-regulated tyrosine kinase substrate	216	RVCEPCYEQLNRK	1000	R	R.VCEPCY#EQLNR.K	1	1	11.1949	12.7839	11.5649	40.6637	20.0854	14.0001	23.6113	49.5883	13.6796	16.5263	28.8385	242.537	22.6925	20.5041	19.436	58.1118	44.2075	23.8645	32.6453	63.6068	16.791	16.5263	26.5545	344.94	6.57867	5.94425	5.63459	16.8469	12.816	6.91843	9.46405	18.44	4.8678	4.79106	7.69828
2479	sp|O43768-4|ENSA_HUMAN	ENSA	ENSA_HUMAN Isoform 4 of Alpha-endosulfine	87	KSVEQKYFDSGDY	24.2431	R	K.Y#FDSGDYNMAK.A	1	1	11.1553	27.2259	18.4687	21.8826	7.98984	23.4149	25.8932	30.3228	29.9809	41.892	51.0699	289.296	22.6124	43.6674	31.0386	31.272	17.5855	39.913	35.8004	38.895	36.8001	41.892	47.0252	386.502	5.85052	11.2981	8.03066	8.09104	4.54992	10.3267	9.26268	10.0633	9.52133	10.8388	12.1669
2157	sp|P52757|CHIO_HUMAN	CHN2	CHIO_HUMAN Beta-chimaerin	158	IYEHIGYATLLRE	20.1669	R	K.MTTNPIYEHIGY#ATLLR.E	1	1	11.051	16.7989	11.7813	18.2642	13.0183	19.5125	20.4718	17.9963	29.991	39.4168	33.6227	231.925	22.4009	26.9437	19.7998	26.1011	28.6532	33.261	28.3046	23.0838	36.8124	39.4168	30.9598	315.737	7.09479	8.53359	6.27098	8.26671	9.07501	10.5344	8.96462	7.31109	11.6592	12.4841	9.80555
2054	sp|Q9H4M9|EHD1_HUMAN	EHD1	EHD1_HUMAN EH domain-containing protein 1	453	TYDEIFYTLSPVN	17.0091	U	K.DKPTYDEIFY#TLSPVNGK.I	1	1	11.0237	18.5702	16.366	38.2618	6.39947	24.7639	47.0816	68.4304	59.1364	60.9331	82.1631	433.13	22.3455	29.7847	27.5048	54.6793	14.0851	42.2125	65.0959	87.7755	72.5871	60.9331	75.6558	552.659	4.04327	5.38934	4.97681	9.89386	2.54861	7.63807	11.7787	15.8824	13.1341	11.0254	13.6894
1268	sp|Q12846|STX4_HUMAN	STX4	STX4_HUMAN Syntaxin-4	251	ILSSADYVERGQE	53.5337	R	K.NILSSADY#VER.G	1	1	11.0214	35.9339	37.9739	53.9148	16.3386	79.64	137.178	122.184	69.8147	87.2513	84.968	736.219	22.341	57.6342	63.8192	77.0486	35.9609	135.754	189.665	156.725	85.6942	87.2513	78.2385	990.132	2.25636	5.82085	6.44552	7.78165	3.63193	13.7107	19.1555	15.8287	8.65482	8.81209	7.90182
2624	sp|P22059|OSBP1_HUMAN	OSBP	OSBP1_HUMAN Oxysterol-binding protein 1	764	TEDGTPYDPYKAL	13.3795	U	K.ATEDGTPY#DPYK.A	1	1	10.9944	10.503	10.682	21.2033	9.1675	14.4535	33.2726	52.8908	24.7168	20.8048	40.8743	249.563	22.2862	16.8457	17.9523	30.3012	20.1775	24.6375	46.0032	67.8429	30.3387	20.8048	37.637	334.827	6.65603	5.03117	5.36165	9.04981	6.02625	7.35827	13.7394	20.2621	9.061	6.2136	11.2407
1961	sp|P78310|CXAR_HUMAN	CXADR	CXAR_HUMAN Coxsackievirus and adenovirus receptor	318	GYSKTQYNQVPSE	30.8348	R	K.TQY#NQVPSEDFER.T	1	1	10.9439	21.9017	20.5923	32.8801	8.41144	23.2047	22.7108	29.3926	28.9783	35.121	41.6013	275.738	22.1838	35.1281	34.6076	46.9884	18.5134	39.5546	31.4004	37.7019	35.5695	35.121	38.3065	375.075	5.91449	9.36562	9.22685	12.5277	4.93592	10.5458	8.37175	10.0518	9.48329	9.36373	10.213
2466	sp|Q9NRW7|VPS45_HUMAN	VPS45	VPS45_HUMAN Vacuolar protein sorting-associated protein 45	318	KAFVENYPQFKKM	1000	R	K.AFVENY#PQFK.K	1	1	10.8965	17.0346	19.7667	65.0638	8.78156	16.929	32.5381	89.4742	33.9748	43.4616	109.661	447.582	22.0876	27.3217	33.22	92.9815	19.3281	28.8572	44.9877	114.768	41.7024	43.4616	100.976	569.692	3.87712	4.79587	5.83123	16.3214	3.39272	5.0654	7.89685	20.1457	7.32016	7.62897	17.7246
934	sp|A1X283|SPD2B_HUMAN	SH3PXD2B	SPD2B_HUMAN SH3 and PX domain-containing protein 2B	855	GLKDSLYVAVADF	48.8739	U	K.DSLY#VAVADFEGDK.D	1	1	10.8415	34.593	58.4661	99.0694	16.0288	89.898	148.692	135.315	111.071	113.255	148.639	965.869	21.9762	55.4835	98.2586	141.578	35.279	153.24	205.585	173.568	136.334	113.255	136.867	1271.42	1.72847	4.36389	7.72823	11.1354	2.77476	12.0526	16.1696	13.6515	10.7229	8.90774	10.7648
1498	sp|P61978-3|HNRPK_HUMAN	HNRNPK	HNRPK_HUMAN Isoform 3 of Heterogeneous nuclear ribonucleoprotein K	114	LEEYQHYKGSDFD	45.026	R	K.IIPTLEEYQHY#K.G	1	1	10.4426	16.8111	15.4978	31.232	12.0927	23.4948	36.0591	37.3397	23.7626	25.8746	41.3964	274.003	21.1676	26.9632	26.0457	44.6331	26.6158	40.0491	49.8559	47.8955	29.1674	25.8746	38.1178	376.386	5.62391	7.16371	6.91995	11.8583	7.07142	10.6404	13.2459	12.7251	7.74935	6.87448	10.1273
537	sp|Q9H706|GAREM_HUMAN	GAREM	GAREM_HUMAN GRB2-associated and regulator of MAPK protein	453	GKSELPYEELWLE	28.9337	R	K.SELPY#EELWLEEGKPSHQPLTR.S	1	1	10.42	31.4825	34.2669	32.7291	9.81195	34.1752	41.5368	25.9444	44.668	55.0241	54.9717	375.031	21.1218	50.4947	57.5892	46.7726	21.5959	58.255	57.4295	33.2788	54.8278	55.0241	50.618	507.007	4.16598	9.95936	11.3586	9.22523	4.25949	11.49	11.3272	6.56377	10.814	10.8527	9.98368
2777	sp|Q8NI22|MCFD2_HUMAN	MCFD2	MCFD2_HUMAN Multiple coagulation factor deficiency protein 2	135	DKNNDGYIDYAEF	13.3795	R	K.NNDGY#IDYAEFAK.S	1	1	10.2301	28.7482	30.1435	24.5441	7.57466	15.4099	15.9046	11.9452	26.647	45.654	42.0406	258.842	20.7368	46.1092	50.6593	35.0755	16.6717	26.2677	21.99	15.3221	32.708	45.654	38.711	349.905	5.92641	13.1776	14.478	10.0243	4.76463	7.5071	6.28456	4.37893	9.34766	13.0475	11.0633
554	sp|P42685|FRK_HUMAN	FRK	FRK_HUMAN Tyrosine-protein kinase FRK	497	FETDSSYSDANNF	17.0091	R	K.LEDYFETDSSY#SDANNFIR.-	1	1	10.2249	19.7981	12.1909	22.1846	9.12077	16.9411	20.6351	17.9033	22.2676	23.5193	28.095	202.881	20.7263	31.754	20.4882	31.7037	20.0747	28.8777	28.5305	22.9645	27.3324	23.5193	25.8699	281.841	7.35388	11.2666	7.26941	11.2488	7.12269	10.2461	10.1229	8.14804	9.6978	8.34488	9.17889
906	sp|P40763|STAT3_HUMAN	STAT3	STAT3_HUMAN Signal transducer and activator of transcription 3	539	LGPGVNYSGCQIT	17.0091	R	K.LLGPGVNY#SGCQITWAK.F	1	1	10.1696	98.1908	62.7525	53.6736	7.60216	95.6976	101.861	111.176	93.2544	115.245	141.338	890.961	20.6142	157.488	105.462	76.704	16.7322	163.126	140.835	142.605	114.465	115.245	130.144	1183.42	1.74192	13.3078	8.91165	6.48155	1.41389	13.7843	11.9007	12.0502	9.6724	9.73831	10.9973
363	sp|P00533|EGFR_HUMAN	EGFR	EGFR_HUMAN Epidermal growth factor receptor	1069	DSFLQRYSSDPTG	23.6238	R	R.Y#SSDPTGALTEDSIDDTFLPVPEYINQSVPK.R	1	1	10.156	97.4445	81.1618	69.4103	14.5806	66.0521	43.9783	40.1864	107.305	141.965	117.276	789.516	20.5867	156.291	136.401	99.1931	32.0916	112.592	60.8052	51.547	131.712	141.965	107.987	1051.17	1.95846	14.8682	12.9761	9.43643	3.05293	10.7111	5.78451	4.90377	12.53	13.5054	10.273
1369	sp|O14828|SCAM3_HUMAN	SCAMP3	SCAM3_HUMAN Secretory carrier-associated membrane protein 3	35	HRPSRQYATLDVY	30.8348	U	R.QY#ATLDVYNPFETR.E	1	1	9.83716	18.4908	19.8165	24.7706	8.80008	19.9637	16.4729	17.077	27.1725	58.9484	52.8029	274.153	19.9404	29.6573	33.3037	35.3992	19.3688	34.0302	22.7757	21.9047	33.3529	58.9484	48.6209	357.302	5.58082	8.30035	9.32089	9.90735	5.42085	9.52419	6.37435	6.13058	9.33464	16.4982	13.6078
672	sp|Q12774|ARHG5_HUMAN	ARHGEF5	ARHG5_HUMAN Rho guanine nucleotide exchange factor 5	656	RRSGRDYSTVSAS	24.437	U	R.DY#STVSASPTALSTLK.Q	1	1	9.82392	114.111	67.5251	65.5122	13.8473	53.6443	28.1759	28.2896	41.8151	66.8859	87.3844	577.015	19.9136	183.023	113.483	93.6224	30.4778	91.442	38.9564	36.287	51.326	66.8859	80.4636	805.88	2.47103	22.7109	14.0819	11.6174	3.78192	11.3468	4.83402	4.50278	6.36894	8.29973	9.98456
674	sp|Q12774|ARHG5_HUMAN	ARHGEF5	ARHG5_HUMAN Rho guanine nucleotide exchange factor 5	1100	QLLYQEYSDVVLN	17.0091	R	K.LINSSQLLYQEY#SDVVLNK.E	1	1	9.75082	77.7518	74.0042	95.7422	3.8199	34.0722	19.7919	19.2999	73.9833	148.2	115.137	671.553	19.7654	124.706	124.372	136.823	8.40753	58.0794	27.3647	24.7559	90.8109	148.2	106.018	869.303	2.2737	14.3455	14.3071	15.7394	0.967158	6.68115	3.14789	2.84779	10.4464	17.0481	12.1957
2322	sp|O60447|EVI5_HUMAN	EVI5	EVI5_HUMAN Ecotropic viral integration site 5 protein homolog	692	KSDSNQYIGELKD	24.2431	R	K.SDSNQY#IGELK.D	1	1	9.67601	16.2523	22.9565	31.8284	9.26271	39.5702	41.6764	40.7138	50.032	45.2101	46.0341	353.213	19.6137	26.067	38.5808	45.4854	20.3871	67.4513	57.6225	52.2235	61.4119	45.2101	42.3882	476.442	4.11671	5.47119	8.0977	9.54689	4.27903	14.1573	12.0943	10.9612	12.8897	9.48912	8.89684
885	sp|P29597|TYK2_HUMAN	TYK2	TYK2_HUMAN Non-receptor tyrosine-protein kinase TYK2	1054	VPEGHEYYRVRED	17.0091	R	K.AVPEGHEY#YR.V	1	1	9.29038	44.5735	43.3967	32.5756	9.28014	55.5763	65.9076	51.4104	55.3752	53.6116	34.5895	455.587	18.832	71.4912	72.9328	46.5532	20.4254	94.7352	91.125	65.9441	67.9704	53.6116	31.85	635.471	2.96348	11.2501	11.477	7.32578	3.21422	14.9079	14.3398	10.3772	10.6961	8.43652	5.01204
1986	sp|Q8TAA9|VANG1_HUMAN	VANGL1	VANG1_HUMAN Vang-like protein 1	312	MAGLKVYNVDGPS	71.7529	R	K.VY#NVDGPSNNATGQSR.A	1	1	9.20889	9.91831	3.64089	37.959	7.75951	6.70292	8.361	52.22	15.6173	19.3771	77.243	248.008	18.6669	15.9079	6.11891	54.2465	17.0786	11.4258	11.5601	66.9825	19.1695	19.3771	71.1254	311.659	5.98951	5.10428	1.96334	17.4057	5.47988	3.66612	3.7092	21.4922	6.15079	6.2174	22.8215
422	sp|Q9BQE3|TBA1C_HUMAN	TUBA1C	TBA1C_HUMAN Tubulin alpha-1C chain	282	ISAEKAYHEQLTV	13.2077	R	K.AY#HEQLTVAEITNACFEPANQMVK.C	1	1	9.13991	46.7315	46.9976	61.9685	7.49991	43.0548	38.8787	37.6397	36.4465	52.3978	60.4286	441.183	18.527	74.9525	78.9845	88.5581	16.5072	73.391	53.7544	48.2803	44.7363	52.3978	55.6426	605.732	3.05862	12.3739	13.0395	14.62	2.72516	12.1161	8.87429	7.97058	7.38549	8.65033	9.18602
1112	sp|Q13164|MK07_HUMAN	MAPK7	MK07_HUMAN Mitogen-activated protein kinase 7	221	QYFMTEYVATRWY	20.1669	R	R.GLCTSPAEHQYFMTEY#VATR.W	1	1	8.36516	13.9547	9.86622	22.684	10.9026	12.3863	20.0647	26.0561	17.1224	24.808	40.2034	206.414	16.9566	22.3819	16.5812	32.4173	23.9964	21.1137	27.7417	33.4221	21.017	24.808	37.0193	277.455	6.11146	8.06684	5.97619	11.6838	8.64876	7.60976	9.99863	12.0459	7.5749	8.94127	13.3424
366	sp|P00533|EGFR_HUMAN	EGFR	EGFR_HUMAN Epidermal growth factor receptor	1138	AVGNPEYLNTVQP	13.3795	R	R.DPHYQDPHSTAVGNPEY#LNTVQPTCVNSTFDSPAHWAQK.G	1	1	8.27639	37.7789	38.0105	27.9823	7.31023	35.6516	18.4406	33.4126	26.2434	103.715	108.882	445.703	16.7766	60.5934	63.8808	39.989	16.0897	60.7716	25.4962	42.8582	32.2125	103.715	100.258	562.641	2.98176	10.7695	11.3537	7.10736	2.85967	10.8011	4.53152	7.61733	5.72523	18.4336	17.8192
1269	sp|Q12846|STX4_HUMAN	STX4	STX4_HUMAN Syntaxin-4	115	EEADENYNSVNTR	48.8739	R	K.EEADENY#NSVNTR.M	1	1	7.96827	118.627	138.512	88.3985	13.2456	177.842	189.083	125.826	238.063	313.453	169.291	1580.31	16.1521	190.265	232.784	126.329	29.1534	303.148	261.429	161.397	292.211	313.453	155.884	2082.2	0.775719	9.13767	11.1797	6.06706	1.40012	14.559	12.5554	7.75127	14.0337	15.0539	7.48647
575	sp|Q9HBL0|TENS1_HUMAN	TNS1	TENS1_HUMAN Tensin-1	798	SYSPYDYQPCLAG	13.3795	R	R.SYSPYDY#QPCLAGPNQDFHSK.S	1	1	7.85606	12.3505	9.51534	11.6408	8.87017	17.1433	13.9715	9.52754	51.4145	59.2858	55.9009	257.476	15.9246	19.8089	15.9915	16.6357	19.5231	29.2225	19.3172	12.221	63.1088	59.2858	51.4736	322.513	4.93767	6.14205	4.95842	5.15815	6.05343	9.06088	5.98959	3.7893	19.5678	18.3825	15.9602
12	sp|O60716|CTND1_HUMAN	CTNND1	CTND1_HUMAN Catenin delta-1	241	TRIEERYRPSMEG	15.0073	R	R.Y#RPSMEGYR.A	1	1	7.67552	14.2083	18.5983	17.1921	11.1762	15.2505	17.576	11.3982	26.8314	39.5541	42.2316	221.692	15.5586	22.7886	31.2564	24.5689	24.5986	25.9959	24.3009	14.6204	32.9342	39.5541	38.8869	295.064	5.27298	7.72329	10.5931	8.32666	8.33671	8.81028	8.23582	4.955	11.1617	13.4053	13.1792
2143	sp|O95721|SNP29_HUMAN	SNAP29	SNP29_HUMAN Synaptosomal-associated protein 29	182	VPRGAGSAMSTDA	30.07	R	R.GAGS#AM*STDAYPK.N	1	1	7.66843	19.7719	23.6942	23.5077	10.8213	26.2321	30.8237	19.9183	36.0472	36.4725	44.3347	279.292	15.5443	31.712	39.8206	33.5945	23.8175	44.7151	42.6173	25.5492	44.2462	36.4725	40.8234	378.913	4.10234	8.36921	10.5092	8.86603	6.28575	11.8009	11.2473	6.74276	11.6771	9.62558	10.7738
1723	sp|P26196|DDX6_HUMAN	DDX6	DDX6_HUMAN Probable ATP-dependent RNA helicase DDX6	473	SLYVAEYHSEPVE	44.2778	U	K.SLYVAEY#HSEPVEDEKP.-	1	1	7.65681	9.66191	17.1574	71.7787	8.00671	34.529	72.3224	117.985	89.8419	118.128	247.864	794.932	15.5207	15.4967	28.8348	102.578	17.6226	58.858	99.9941	151.339	110.277	118.128	228.233	946.882	1.63914	1.6366	3.04524	10.8332	1.86112	6.21599	10.5604	15.9828	11.6463	12.4755	24.1037
2603	sp|O00192|ARVC_HUMAN	ARVCF	ARVC_HUMAN Armadillo repeat protein deleted in velo-cardio-facial syndrome	259	RFQAEPYGLEDDT	15.0073	R	R.FQAEPY#GLEDDTR.S	1	1	7.29192	28.1799	22.3691	21.6847	9.0235	15.4414	23.9912	19.1016	31.8349	39.0737	32.546	250.538	14.7811	45.1976	37.5936	30.9892	19.8606	26.3213	33.1706	24.5015	39.0758	39.0737	29.9684	340.533	4.34056	13.2726	11.0396	9.10018	5.8322	7.72944	9.74079	7.19505	11.4749	11.4743	8.80042
838	sp|P22681|CBL_HUMAN	CBL	CBL_HUMAN E3 ubiquitin-protein ligase CBL	141	EGKERMYEENSQP	44.2778	U	R.MY#EENSQPR.R	1	1	6.54376	17.3255	28.8642	86.0876	9.84116	44.3517	87.5669	135.449	29.6751	32.0444	242.594	720.343	13.2645	27.7882	48.5094	123.026	21.6602	75.6018	121.071	173.74	36.4248	32.0444	223.381	896.512	1.47957	3.0996	5.4109	13.7228	2.41606	8.43288	13.5047	19.3795	4.06294	3.57435	24.9167
2879	sp|Q9UKS6|PACN3_HUMAN	PACSIN3	PACN3_HUMAN Protein kinase C and casein kinase substrate in neurons protein 3	418	GLYPANYVECVGA	20.1669	U	R.IGLYPANY#VECVGA.-	1	1	6.24476	17.7739	16.2988	19.7225	2.09116	31.6899	36.6443	34.4575	28.8579	33.5806	31.0603	258.422	12.6584	28.5075	27.3919	28.1851	4.6026	54.0185	50.665	44.1985	35.4216	33.5806	28.6003	347.83	3.63926	8.19582	7.87509	8.10312	1.32323	15.5301	14.566	12.7069	10.1836	9.6543	8.2225
715	sp|O75886|STAM2_HUMAN	STAM2	STAM2_HUMAN Signal transducing adapter molecule 2	192	TETKSLYPSSEIQ	48.8739	R	K.SLY#PSSEIQLNNK.V	1	1	4.20215	12.2583	11.1063	33.3916	10.4386	13.059	24.0353	29.2469	91.1364	96.5211	265.429	590.824	8.51796	19.661	18.6653	47.7194	22.9752	22.2603	33.2316	37.515	111.865	96.5211	244.407	663.339	1.2841	2.96395	2.81383	7.19381	3.46356	3.3558	5.00975	5.65548	16.864	14.5508	36.8449
939	sp|Q68CZ2|TENS3_HUMAN	TNS3	TENS3_HUMAN Tensin-3	855	VSPETPYVKTALR	26.9265	R	K.ESM*CSTPAFPVSPETPY#VK.T	1	1	3.99733	15.0398	15.3848	14.2209	2.62883	20.0368	21.923	22.0223	42.0184	47.3175	37.401	241.991	8.10278	24.1222	25.8558	20.3229	5.78601	34.1546	30.3112	28.2479	51.5755	47.3175	34.4388	310.235	2.61182	7.77547	8.33425	6.5508	1.86504	11.0093	9.77038	9.10533	16.6246	15.2521	11.1009
1980	sp|P46108|CRK_HUMAN	CRK	CRK_HUMAN Adapter molecule crk	136	RQEEAEYVRALFD	1000	R	R.QEEAEY#VR.A	1	1	3.79636	43.8213	91.5657	213.801	8.81734	185.819	338.018	330.765	200.369	203.483	276.637	1896.89	7.69541	70.2847	153.886	305.539	19.4068	316.747	467.349	424.272	245.944	203.483	254.728	2469.33	0.311639	2.8463	6.23188	12.3733	0.785913	12.8272	18.9261	17.1816	9.95991	8.2404	10.3156
1989	sp|Q9UGK3-2|STAP2_HUMAN	STAP2	STAP2_HUMAN Isoform 2 of Signal-transducing adaptor protein 2	250	FLLDEDYEKVLGY	1000	R	K.ALVPFLLDEDY#EK.V	2	1	3.78153	23.6515	32.6542	31.9194	6.20615	47.8547	53.853	32.7699	42.32	51.1995	40.3255	366.535	7.66535	37.9345	54.8789	45.6155	13.6596	81.5729	74.4581	42.034	51.9457	51.1995	37.1317	498.096	1.53893	7.61591	11.0177	9.15797	2.74237	16.377	14.9485	8.43893	10.4289	10.279	7.45474
460	sp|Q08174-2|PCDH1_HUMAN	PCDH1	PCDH1_HUMAN Isoform 2 of Protocadherin-1	1020	SEQYSDYSYRTNP	27.0548	R	K.HQVVQDLPPANTFVGTGDTTSTGSEQYSDY#SYR.T	1	1	3.26055	25.2137	16.406	15.499	6.05548	11.4606	10.6832	9.54228	33.3536	64.3917	48.6533	244.519	6.60928	40.4402	27.572	22.1494	13.328	19.5357	14.7707	12.2399	40.9399	64.3917	44.7999	306.777	2.15443	13.1823	8.98764	7.22004	4.34453	6.36806	4.81482	3.98983	13.3452	20.9898	14.6034
821	sp|Q9UM54-6|MYO6_HUMAN	MYO6	MYO6_HUMAN Isoform 6 of Unconventional myosin-VI	1146	PKSVTDYAQQNPA	48.8739	R	K.SVTDY#AQQNPAAQIPAR.Q	1	1	3.18904	25.9602	25.3684	23.1261	1.68333	19.095	18.2726	24.7545	91.7483	183.571	100.195	516.963	6.46433	41.6375	42.6343	33.0491	3.70497	32.5492	25.264	31.7526	112.617	183.571	92.2594	605.503	1.0676	6.87652	7.04114	5.45813	0.611884	5.37557	4.1724	5.244	18.5989	30.3171	15.2368
410	sp|P16885|PLCG2_HUMAN	PLCG2	PLCG2_HUMAN 1-phosphatidylinositol 4,5-bisphosphate phosphodiesterase gamma-2	763	RMYVDPSEINPSM	31.2747	U	R.MYVDPS#EINPSMPQR.T	1	1	3.13229	53.3462	47.9204	45.3069	8.80095	45.4025	58.4598	56.7076	67.5133	72.4049	86.3796	545.374	6.3493	85.5617	80.5354	64.7472	19.3707	77.393	80.8275	72.7388	82.8692	72.4049	79.5383	722.336	0.878995	11.8451	11.1493	8.96359	2.68168	10.7143	11.1897	10.0699	11.4724	10.0237	11.0113
628	sp|Q8WXE0|CSKI2_HUMAN	CASKIN2	CSKI2_HUMAN Caskin-2	336	GTDRIGYFPPGIV	126.676	R	R.IGY#FPPGIVEVVSK.R	2	1	2.07928	15.1631	20.2108	14.9484	0	23.9046	32.1453	23.228	73.9356	77.1853	67.7499	350.55	4.21479	24.3201	33.9663	21.3625	0	40.7477	44.4447	29.7945	90.7523	77.1853	62.3841	429.172	0.982075	5.66674	7.91438	4.97759	0	9.49449	10.3559	6.94231	21.1459	17.9847	14.5359
411	sp|P16885|PLCG2_HUMAN	PLCG2	PLCG2_HUMAN 1-phosphatidylinositol 4,5-bisphosphate phosphodiesterase gamma-2	818	GTRIQQYFPSNYV	18.6027	U	R.IQQY#FPSNYVEDISTADFEELEK.Q	1	1	1.87449	7.43246	3.2658	33.768	0.903175	20.2766	63.8658	167.042	31.1415	34.1136	68.0798	431.763	3.79967	11.9209	5.48853	48.2573	1.98787	34.5635	88.3019	214.265	38.2246	34.1136	62.6879	543.61	0.69897	2.19291	1.00964	8.87719	0.36568	6.35813	16.2436	39.4151	7.03162	6.27537	11.5318
630	sp|P42566|EPS15_HUMAN	EPS15	EPS15_HUMAN Epidermal growth factor receptor substrate 15	849	FANFSAYPSEEDM	31.2747	R	K.EADPSNFANFSAY#PSEEDM*IEWAK.R	4	3	1.84095	9.08867	20.1339	48.5911	3.40625	17.6468	27.2209	24.6403	184.2	249.911	308.614	895.295	3.7317	14.5773	33.8372	69.4407	7.4971	30.0806	37.6361	31.6061	226.097	249.911	284.172	988.587	0.377478	1.47456	3.42279	7.02424	0.758366	3.04279	3.80706	3.1971	22.8707	25.2796	28.7453
1451	sp|Q9NZH5|PTTG2_HUMAN	PTTG2	PTTG2_HUMAN Securin-2	111	PASDDAYPEIEKF	59.2977	R	K.SSVPASDDAY#PEIEK.F	1	1	1.80875	18.1407	16.0283	22.6335	1.67536	12.8737	22.7708	21.6912	32.9579	32.8536	49.0009	232.435	3.66641	29.0958	26.9373	32.3452	3.68745	21.9444	31.4833	27.8232	40.4542	32.8536	45.1201	295.411	1.24112	9.84927	9.11857	10.9492	1.24824	7.42843	10.6575	9.41849	13.6942	11.1213	15.2737
317	sp|Q09666|AHNK_HUMAN	AHNAK	AHNK_HUMAN Neuroblast differentiation-associated protein AHNAK	61	IVGATIYFDNLQS	24.2431	R	K.EGDQIVGATIY#FDNLQSGEVTQLLNTMGHHTVGLK.L	1	1	1.54773	25.0895	21.3401	23.2869	1.58686	43.8824	37.2593	45.3372	63.5894	75.7476	84.1136	422.781	3.13733	40.2409	35.8643	33.2789	3.49266	74.8019	51.5153	58.1539	78.0529	75.7476	77.4518	531.737	0.590014	7.56781	6.74474	6.25851	0.656838	14.0674	9.68811	10.9366	14.6788	14.2453	14.5658
1	sp|P46109|CRKL_HUMAN	CRKL	CRKL_HUMAN Crk-like protein	207	PEPAHAYAQPQTT	15.3812	U	R.NSNSYGIPEPAHAY#AQPQTTTPLPAVSGS#PGAAITPLPSTQNGPVFAK.A	1	0	0	0	0	0	0	0	0	0	0	0	0		0	0	0	0	0	0	0	0	0	0	0	0	0	0	0	0	0	0	0	0	0	0	0
9	sp|O60716|CTND1_HUMAN	CTNND1	CTND1_HUMAN Catenin delta-1	193	NGGPGPYVGQAGT	42.8692	R	K.NGNGGPGPY#VGQAGTATLPR.N	1	0	0	0	0	0	0	0	0	0	0	0	0		0	0	0	0	0	0	0	0	0	0	0	0	0	0	0	0	0	0	0	0	0	0	0
10	sp|O60716|CTND1_HUMAN	CTNND1	CTND1_HUMAN Catenin delta-1	217	DGYSRHYEDGYPG	20.1669	R	R.HY#EDGYPGGSDNYGSLSR.V	1	0	0	0	0	0	0	0	0	0	0	0	0		0	0	0	0	0	0	0	0	0	0	0	0	0	0	0	0	0	0	0	0	0	0	0
11	sp|O60716|CTND1_HUMAN	CTNND1	CTND1_HUMAN Catenin delta-1	334	EVPSDQYYWAPLA	19.8431	R	R.SYEDMIGEEVPSDQY#YWAPLAQHER.G	1	0	0	0	0	0	0	0	0	0	0	0	0		0	0	0	0	0	0	0	0	0	0	0	0	0	0	0	0	0	0	0	0	0	0	0
275	sp|P68363|TBA1B_HUMAN	TUBA1B	TBA1B_HUMAN Tubulin alpha-1B chain	262	QTNLVPYPRIHFP	34.8923	R	R.FDGALNVDLTEFQTNLVPY#PR.I	1	0	0	0	0	0	0	0	0	0	0	0	0		0	0	0	0	0	0	0	0	0	0	0	0	0	0	0	0	0	0	0	0	0	0	0
347	sp|Q9BZI7|REN3B_HUMAN	UPF3B	REN3B_HUMAN Regulator of nonsense transcripts 3B	127	DNKGQEYPAIVEF	1000	R	K.GQEY#PAIVEFAPFQK.A	1	0	0	0	0	0	0	0	0	0	0	0	0		0	0	0	0	0	0	0	0	0	0	0	0	0	0	0	0	0	0	0	0	0	0	0
348	sp|Q9BZI7|REN3B_HUMAN	UPF3B	REN3B_HUMAN Regulator of nonsense transcripts 3B	79	PMPEHDYFEFFSN	27.1301	R	K.EQLQEHLQPM*PEHDY#FEFFSNDTSLYPHMYAR.A	2	0	0	0	0	0	0	0	0	0	0	0	0		0	0	0	0	0	0	0	0	0	0	0	0	0	0	0	0	0	0	0	0	0	0	0
355	sp|P00533|EGFR_HUMAN	EGFR	EGFR_HUMAN Epidermal growth factor receptor	764	EILDEAYVMASVD	99.2279	R	K.EILDEAY#VMASVDNPHVCR.L	1	0	0	0	0	0	0	0	0	0	0	0	0		0	0	0	0	0	0	0	0	0	0	0	0	0	0	0	0	0	0	0	0	0	0	0
356	sp|P00533|EGFR_HUMAN	EGFR	EGFR_HUMAN Epidermal growth factor receptor	1110	SVQNPVYHNQPLN	76.0346	R	K.RPAGSVQNPVY#HNQPLNPAPSR.D	7	0	0	0	0	0	0	0	0	0	0	0	0		0	0	0	0	0	0	0	0	0	0	0	0	0	0	0	0	0	0	0	0	0	0	0
357	sp|P00533|EGFR_HUMAN	EGFR	EGFR_HUMAN Epidermal growth factor receptor	1104	PKRPAGSVQNPVY	71.8061	R	K.RPAGS#VQNPVY#HNQPLNPAPSR.D	2	0	0	0	0	0	0	0	0	0	0	0	0		0	0	0	0	0	0	0	0	0	0	0	0	0	0	0	0	0	0	0	0	0	0	0
361	sp|P00533|EGFR_HUMAN	EGFR	EGFR_HUMAN Epidermal growth factor receptor	1190	NGIFKGSTAENAE	24.437	R	K.GS#TAENAEY#LR.V	1	0	0	0	0	0	0	0	0	0	0	0	0		0	0	0	0	0	0	0	0	0	0	0	0	0	0	0	0	0	0	0	0	0	0	0
418	sp|Q05655|KPCD_HUMAN	PRKCD	KPCD_HUMAN Protein kinase C delta type	304	ASRRSDSASSEPV	20.1669	R	R.RSDS#ASSEPVGIY#QGFEK.K	2	0	0	0	0	0	0	0	0	0	0	0	0		0	0	0	0	0	0	0	0	0	0	0	0	0	0	0	0	0	0	0	0	0	0	0
427	sp|Q5EBL8-2|PDZ11_HUMAN	PDZD11	PDZ11_HUMAN Isoform 2 of PDZ domain-containing protein 11	41	RIPYDDYPVVFLP	31.2747	R	R.IPYDDY#PVVFLPAYENPPAWIPPHER.V	2	0	0	0	0	0	0	0	0	0	0	0	0		0	0	0	0	0	0	0	0	0	0	0	0	0	0	0	0	0	0	0	0	0	0	0
429	sp|P63241-2|IF5A1_HUMAN	EIF5A	IF5A1_HUMAN Isoform 2 of Eukaryotic translation initiation factor 5A-1	128	IGIQDGYLSLLQD	59.2977	R	R.NDFQLIGIQDGY#LSLLQDSGEVR.E	4	0	0	0	0	0	0	0	0	0	0	0	0		0	0	0	0	0	0	0	0	0	0	0	0	0	0	0	0	0	0	0	0	0	0	0
433	sp|P21860|ERBB3_HUMAN	ERBB3	ERBB3_HUMAN Receptor tyrosine-protein kinase erbB-3	1289	PASEQGYEEMRAF	40.3622	R	R.DGGGPGGDYAAM*GACPASEQGY#EEM*R.A	5	0	0	0	0	0	0	0	0	0	0	0	0		0	0	0	0	0	0	0	0	0	0	0	0	0	0	0	0	0	0	0	0	0	0	0
434	sp|P21860|ERBB3_HUMAN	ERBB3	ERBB3_HUMAN Receptor tyrosine-protein kinase erbB-3	1328	AFDNPDYWHSRLF	31.2747	R	R.SLEATDSAFDNPDY#WHSR.L	1	0	0	0	0	0	0	0	0	0	0	0	0		0	0	0	0	0	0	0	0	0	0	0	0	0	0	0	0	0	0	0	0	0	0	0
457	sp|Q08174-2|PCDH1_HUMAN	PCDH1	PCDH1_HUMAN Isoform 2 of Protocadherin-1	1089	ALPEDHYERTTPD	1000	R	R.LGPLALPEDHY#ER.T	1	0	0	0	0	0	0	0	0	0	0	0	0		0	0	0	0	0	0	0	0	0	0	0	0	0	0	0	0	0	0	0	0	0	0	0
459	sp|Q08174-2|PCDH1_HUMAN	PCDH1	PCDH1_HUMAN Isoform 2 of Protocadherin-1	1017	STGSEQYSDYSYR	36.6555	R	K.HQVVQDLPPANTFVGTGDTTSTGSEQY#SDYSYR.T	1	0	0	0	0	0	0	0	0	0	0	0	0		0	0	0	0	0	0	0	0	0	0	0	0	0	0	0	0	0	0	0	0	0	0	0
473	sp|Q9Y490|TLN1_HUMAN	TLN1	TLN1_HUMAN Talin-1	1116	AQGNENYAGIAAR	149.41	R	K.AVSSAIAQLLGEVAQGNENY#AGIAAR.D	3	0	0	0	0	0	0	0	0	0	0	0	0		0	0	0	0	0	0	0	0	0	0	0	0	0	0	0	0	0	0	0	0	0	0	0
475	sp|Q9Y490|TLN1_HUMAN	TLN1	TLN1_HUMAN Talin-1	308	ARSLKTYGVSFFL	24.437	R	R.TY#GVSFFLVK.E	1	0	0	0	0	0	0	0	0	0	0	0	0		0	0	0	0	0	0	0	0	0	0	0	0	0	0	0	0	0	0	0	0	0	0	0
476	sp|Q9Y490|TLN1_HUMAN	TLN1	TLN1_HUMAN Talin-1	1777	SALQLLYTAKEAG	17.0091	R	K.TLAESALQLLY#TAK.E	1	0	0	0	0	0	0	0	0	0	0	0	0		0	0	0	0	0	0	0	0	0	0	0	0	0	0	0	0	0	0	0	0	0	0	0
519	sp|Q6ZVM7|TM1L2_HUMAN	TOM1L2	TM1L2_HUMAN TOM1-like protein 2	200	SPPPAPYSAPQAP	19.8431	R	R.TSAGSYSSPPPAPY#SAPQAPALSVTGPITANSEQIAR.L	1	0	0	0	0	0	0	0	0	0	0	0	0		0	0	0	0	0	0	0	0	0	0	0	0	0	0	0	0	0	0	0	0	0	0	0
522	sp|Q96RF0|SNX18_HUMAN	SNX18	SNX18_HUMAN Sorting nexin-18	274	EWQENPYPFQCTI	38.3708	R	K.LCVVLGPYGPEWQENPY#PFQCTIDDPTK.Q	2	0	0	0	0	0	0	0	0	0	0	0	0		0	0	0	0	0	0	0	0	0	0	0	0	0	0	0	0	0	0	0	0	0	0	0
527	sp|Q13480-2|GAB1_HUMAN	GAB1	GAB1_HUMAN Isoform 2 of GRB2-associated-binding protein 1	285	EADGELYVFNTPS	14.4608	R	K.VSPSSTEADGELY#VFNTPSGTSSVETQM*R.H	1	0	0	0	0	0	0	0	0	0	0	0	0		0	0	0	0	0	0	0	0	0	0	0	0	0	0	0	0	0	0	0	0	0	0	0
541	sp|P22626|ROA2_HUMAN	HNRNPA2B1	ROA2_HUMAN Heterogeneous nuclear ribonucleoproteins A2/B1	331	RNMGGPYGGGNYG	49.5899	R	R.NMGGPY#GGGNYGPGGSGGSGGYGGR.S	2	0	0	0	0	0	0	0	0	0	0	0	0		0	0	0	0	0	0	0	0	0	0	0	0	0	0	0	0	0	0	0	0	0	0	0
543	sp|P22626|ROA2_HUMAN	HNRNPA2B1	ROA2_HUMAN Heterogeneous nuclear ribonucleoproteins A2/B1	262	FGGSPGYGGGRGG	28.9337	R	R.GFGDGYNGYGGGPGGGNFGGSPGY#GGGR.G	1	0	0	0	0	0	0	0	0	0	0	0	0		0	0	0	0	0	0	0	0	0	0	0	0	0	0	0	0	0	0	0	0	0	0	0
560	sp|Q13263|TIF1B_HUMAN	TRIM28	TIF1B_HUMAN Transcription intermediary factor 1-beta	594	EGPRLASPSGSTS	30.8348	R	R.LAS#PSGSTSSGLEVVAPEGTSAPGGGPGTLDDSATICR.V	1	0	0	0	0	0	0	0	0	0	0	0	0		0	0	0	0	0	0	0	0	0	0	0	0	0	0	0	0	0	0	0	0	0	0	0
561	sp|Q13263|TIF1B_HUMAN	TRIM28	TIF1B_HUMAN Transcription intermediary factor 1-beta	50	ASAAASSPAGGGA	19.8431	R	R.STAPSAAASASASAAASS#PAGGGAEALELLEHCGVCR.E	1	0	0	0	0	0	0	0	0	0	0	0	0		0	0	0	0	0	0	0	0	0	0	0	0	0	0	0	0	0	0	0	0	0	0	0
566	sp|P60709|ACTB_HUMAN	ACTB	ACTB_HUMAN Actin, cytoplasmic 1	166	THTVPIYEGYALP	31.7689	R	R.TTGIVM*DSGDGVTHTVPIY#EGYALPHAILR.L	1	0	0	0	0	0	0	0	0	0	0	0	0		0	0	0	0	0	0	0	0	0	0	0	0	0	0	0	0	0	0	0	0	0	0	0
573	sp|Q8IZ07|AN13A_HUMAN	ANKRD13A	AN13A_HUMAN Ankyrin repeat domain-containing protein 13A	524	NTYDAQYERAIQE	61.2798	U	R.SQELSGPASNGGISQTNTYDAQY#ER.A	2	0	0	0	0	0	0	0	0	0	0	0	0		0	0	0	0	0	0	0	0	0	0	0	0	0	0	0	0	0	0	0	0	0	0	0
583	sp|P24666|PPAC_HUMAN	ACP1	PPAC_HUMAN Low molecular weight phosphotyrosine protein phosphatase	132	LIIEDPYYGNDSD	17.0091	R	K.QLIIEDPY#YGNDSDFETVYQQCVR.C	2	0	0	0	0	0	0	0	0	0	0	0	0		0	0	0	0	0	0	0	0	0	0	0	0	0	0	0	0	0	0	0	0	0	0	0
586	sp|P25787|PSA2_HUMAN	PSMA2	PSA2_HUMAN Proteasome subunit alpha type-2	101	QQYYLVYQEPIPT	36.5564	R	K.LAQQYYLVY#QEPIPTAQLVQR.V	1	0	0	0	0	0	0	0	0	0	0	0	0		0	0	0	0	0	0	0	0	0	0	0	0	0	0	0	0	0	0	0	0	0	0	0
592	sp|Q96DX4|RSPRY_HUMAN	RSPRY1	RSPRY_HUMAN RING finger and SPRY domain-containing protein 1	390	FLNHEGYGIGDDE	137.179	U	K.FLNHEGY#GIGDDEYSCAYDGCR.Q	2	0	0	0	0	0	0	0	0	0	0	0	0		0	0	0	0	0	0	0	0	0	0	0	0	0	0	0	0	0	0	0	0	0	0	0
642	sp|P21333|FLNA_HUMAN	FLNA	FLNA_HUMAN Filamin-A	1261	TSGVQCYGPGIEG	97.5963	R	K.LQVEPAVDTSGVQCY#GPGIEGQGVFR.E	1	0	0	0	0	0	0	0	0	0	0	0	0		0	0	0	0	0	0	0	0	0	0	0	0	0	0	0	0	0	0	0	0	0	0	0
675	sp|O15357|SHIP2_HUMAN	INPPL1	SHIP2_HUMAN Phosphatidylinositol 3,4,5-trisphosphate 5-phosphatase 2	1003	LPPEPPSPARAPV	93.8392	R	K.NSFNNPAY#YVLEGVPHQLLPPEPPS#PAR.A	5	0	0	0	0	0	0	0	0	0	0	0	0		0	0	0	0	0	0	0	0	0	0	0	0	0	0	0	0	0	0	0	0	0	0	0
676	sp|O15357|SHIP2_HUMAN	INPPL1	SHIP2_HUMAN Phosphatidylinositol 3,4,5-trisphosphate 5-phosphatase 2	1135	TLSEVDYAPAGPA	31.2747	R	K.TLSEVDY#APAGPAR.S	1	0	0	0	0	0	0	0	0	0	0	0	0		0	0	0	0	0	0	0	0	0	0	0	0	0	0	0	0	0	0	0	0	0	0	0
677	sp|O15357|SHIP2_HUMAN	INPPL1	SHIP2_HUMAN Phosphatidylinositol 3,4,5-trisphosphate 5-phosphatase 2	986	SFNNPAYYVLEGV	19.8431	R	K.NSFNNPAY#YVLEGVPHQLLPPEPPSPAR.A	3	0	0	0	0	0	0	0	0	0	0	0	0		0	0	0	0	0	0	0	0	0	0	0	0	0	0	0	0	0	0	0	0	0	0	0
698	sp|P07900-2|HS90A_HUMAN	HSP90AA1	HS90A_HUMAN Isoform 2 of Heat shock protein HSP 90-alpha	726	CIVTSTYGWTANM	17.0091	R	R.LVTSPCCIVTSTY#GWTANMER.I	1	0	0	0	0	0	0	0	0	0	0	0	0		0	0	0	0	0	0	0	0	0	0	0	0	0	0	0	0	0	0	0	0	0	0	0
703	sp|Q8TE68|ES8L1_HUMAN	EPS8L1	ES8L1_HUMAN Epidermal growth factor receptor kinase substrate 8-like protein 1	526	PAGQEGYVPYNIL	57.7111	R	K.VRDPAGQEGY#VPYNILTPYPGPR.L	1	0	0	0	0	0	0	0	0	0	0	0	0		0	0	0	0	0	0	0	0	0	0	0	0	0	0	0	0	0	0	0	0	0	0	0
725	sp|Q2M2I8|AAK1_HUMAN	AAK1	AAK1_HUMAN AP2-associated protein kinase 1	34	SGLGSGYIGRVFG	24.2431	R	R.EQGGSGLGSGSSGGGGSTSGLGSGY#IGR.V	1	0	0	0	0	0	0	0	0	0	0	0	0		0	0	0	0	0	0	0	0	0	0	0	0	0	0	0	0	0	0	0	0	0	0	0
754	sp|Q16539|MK14_HUMAN	MAPK14	MK14_HUMAN Mitogen-activated protein kinase 14	180	HTDDEMTGYVATR	60.3582	R	R.HTDDEM*T#GY#VATR.W	5	0	0	0	0	0	0	0	0	0	0	0	0		0	0	0	0	0	0	0	0	0	0	0	0	0	0	0	0	0	0	0	0	0	0	0
765	sp|Q16181|SEPT7_HUMAN	2017-09-07	SEPT7_HUMAN Septin-7	30	QKNLEGYVGFANL	249.025	R	K.NLEGY#VGFANLPNQVYR.K	2	0	0	0	0	0	0	0	0	0	0	0	0		0	0	0	0	0	0	0	0	0	0	0	0	0	0	0	0	0	0	0	0	0	0	0
778	sp|Q8N3R9|MPP5_HUMAN	MPP5	MPP5_HUMAN MAGUK p55 subfamily member 5	363	DPSDDPYVPCREL	71.0667	R	K.AHFDYDPSDDPY#VPCR.E	1	0	0	0	0	0	0	0	0	0	0	0	0		0	0	0	0	0	0	0	0	0	0	0	0	0	0	0	0	0	0	0	0	0	0	0
786	sp|Q92692|PVRL2_HUMAN	PVRL2	PVRL2_HUMAN Poliovirus receptor-related protein 2	518	IYDALSYSSPSDS	30.8348	U	K.INPIYDALSY#SSPSDSYQGK.G	1	0	0	0	0	0	0	0	0	0	0	0	0		0	0	0	0	0	0	0	0	0	0	0	0	0	0	0	0	0	0	0	0	0	0	0
787	sp|O00560|SDCB1_HUMAN	SDCBP	SDCB1_HUMAN Syntenin-1	46	PHDGNLYPRLYPE	46.1286	R	K.VIQAQTAFSANPANPAILSEASAPIPHDGNLY#PR.L	1	0	0	0	0	0	0	0	0	0	0	0	0		0	0	0	0	0	0	0	0	0	0	0	0	0	0	0	0	0	0	0	0	0	0	0
788	sp|O00560|SDCB1_HUMAN	SDCBP	SDCB1_HUMAN Syntenin-1	50	NLYPRLYPELSQY	19.8465	R	R.LY#PELSQYM*GLSLNEEEIR.A	1	0	0	0	0	0	0	0	0	0	0	0	0		0	0	0	0	0	0	0	0	0	0	0	0	0	0	0	0	0	0	0	0	0	0	0
801	sp|Q00610|CLH1_HUMAN	CLTC	CLH1_HUMAN Clathrin heavy chain 1	1206	QVGDRCYDEKMYD	1000	R	R.LAELEEFINGPNNAHIQQVGDRCY#DEK.M	1	0	0	0	0	0	0	0	0	0	0	0	0		0	0	0	0	0	0	0	0	0	0	0	0	0	0	0	0	0	0	0	0	0	0	0
802	sp|Q00610|CLH1_HUMAN	CLTC	CLH1_HUMAN Clathrin heavy chain 1	1477	FITEEDYQALRTS	84.6094	R	K.SVNESLNNLFITEEDY#QALR.T	1	0	0	0	0	0	0	0	0	0	0	0	0		0	0	0	0	0	0	0	0	0	0	0	0	0	0	0	0	0	0	0	0	0	0	0
808	sp|Q8IY67-2|RAVR1_HUMAN	RAVER1	RAVR1_HUMAN Isoform 2 of Ribonucleoprotein PTB-binding 1	463	PPAAQLTPPPAPV	1000	R	R.EALGLGPPAAQLT#PPPAPVGLR.G	1	0	0	0	0	0	0	0	0	0	0	0	0		0	0	0	0	0	0	0	0	0	0	0	0	0	0	0	0	0	0	0	0	0	0	0
809	sp|Q8IY67-2|RAVR1_HUMAN	RAVER1	RAVR1_HUMAN Isoform 2 of Ribonucleoprotein PTB-binding 1	588	DSYSFDYPSDMGP	45.026	R	R.LPPEPGLSDSYSFDY#PSDM*GPR.R	1	0	0	0	0	0	0	0	0	0	0	0	0		0	0	0	0	0	0	0	0	0	0	0	0	0	0	0	0	0	0	0	0	0	0	0
810	sp|Q8IY67-2|RAVR1_HUMAN	RAVER1	RAVR1_HUMAN Isoform 2 of Ribonucleoprotein PTB-binding 1	509	RIPLNPYLNLHSL	30.6121	R	R.IPLNPY#LNLHSLLPASNLAGK.E	1	0	0	0	0	0	0	0	0	0	0	0	0		0	0	0	0	0	0	0	0	0	0	0	0	0	0	0	0	0	0	0	0	0	0	0
824	sp|Q16625|OCLN_HUMAN	OCLN	OCLN_HUMAN Occludin	315	PSPPSDYVERVDS	17.0091	R	K.NVSAGTQDVPSPPSDY#VER.V	1	0	0	0	0	0	0	0	0	0	0	0	0		0	0	0	0	0	0	0	0	0	0	0	0	0	0	0	0	0	0	0	0	0	0	0
839	sp|Q9Y2W1|TR150_HUMAN	THRAP3	TR150_HUMAN Thyroid hormone receptor-associated protein 3	320	KSPVGKSPPSTGS	18.8054	U	K.S#PPSTGSTYGSSQK.E	1	0	0	0	0	0	0	0	0	0	0	0	0		0	0	0	0	0	0	0	0	0	0	0	0	0	0	0	0	0	0	0	0	0	0	0
842	sp|P12236|ADT3_HUMAN	SLC25A6	ADT3_HUMAN ADP/ATP translocase 3	195	AAYFGVYDTAKGM	17.0091	R	R.AAYFGVY#DTAK.G	1	0	0	0	0	0	0	0	0	0	0	0	0		0	0	0	0	0	0	0	0	0	0	0	0	0	0	0	0	0	0	0	0	0	0	0
843	sp|P12236|ADT3_HUMAN	SLC25A6	ADT3_HUMAN ADP/ATP translocase 3	112	HTQFWRYFAGNLA	15.3812	R	R.Y#FAGNLASGGAAGATSLCFVYPLDFAR.T	1	0	0	0	0	0	0	0	0	0	0	0	0		0	0	0	0	0	0	0	0	0	0	0	0	0	0	0	0	0	0	0	0	0	0	0
857	sp|P51991|ROA3_HUMAN	HNRNPA3	ROA3_HUMAN Heterogeneous nuclear ribonucleoprotein A3	360	RSSGSPYGGGYGS	30.8348	R	R.SSGSPY#GGGYGSGGGSGGYGSR.R	1	0	0	0	0	0	0	0	0	0	0	0	0		0	0	0	0	0	0	0	0	0	0	0	0	0	0	0	0	0	0	0	0	0	0	0
858	sp|P51991|ROA3_HUMAN	HNRNPA3	ROA3_HUMAN Heterogeneous nuclear ribonucleoprotein A3	373	GGGSGGYGSRRFx	15.0073	R	R.SSGSPYGGGYGSGGGSGGY#GSR.R	1	0	0	0	0	0	0	0	0	0	0	0	0		0	0	0	0	0	0	0	0	0	0	0	0	0	0	0	0	0	0	0	0	0	0	0
866	sp|Q96NC0|ZMAT2_HUMAN	ZMAT2	ZMAT2_HUMAN Zinc finger matrin-type protein 2	80	QSEMGGYYCNVCD	30.8348	R	K.TTPQSEMGGY#YCNVCDCVVK.D	1	0	0	0	0	0	0	0	0	0	0	0	0		0	0	0	0	0	0	0	0	0	0	0	0	0	0	0	0	0	0	0	0	0	0	0
868	sp|Q07912|ACK1_HUMAN	TNK2	ACK1_HUMAN Activated CDC42 kinase 1	827	FASDPKYATPQVI	48.8739	R	K.Y#ATPQVIQAPGPR.A	1	0	0	0	0	0	0	0	0	0	0	0	0		0	0	0	0	0	0	0	0	0	0	0	0	0	0	0	0	0	0	0	0	0	0	0
875	sp|Q92796|DLG3_HUMAN	DLG3	DLG3_HUMAN Disks large homolog 3	702	QFNDNLYGTSIQS	20.1669	R	K.FIEAGQFNDNLY#GTSIQSVR.A	1	0	0	0	0	0	0	0	0	0	0	0	0		0	0	0	0	0	0	0	0	0	0	0	0	0	0	0	0	0	0	0	0	0	0	0
903	sp|P40763|STAT3_HUMAN	STAT3	STAT3_HUMAN Signal transducer and activator of transcription 3	45	ESQDWAYAASKES	49.5899	R	R.QFLAPWIESQDWAY#AASK.E	1	0	0	0	0	0	0	0	0	0	0	0	0		0	0	0	0	0	0	0	0	0	0	0	0	0	0	0	0	0	0	0	0	0	0	0
924	sp|Q8TF42|UBS3B_HUMAN	UBASH3B	UBS3B_HUMAN Ubiquitin-associated and SH3 domain-containing protein B	352	VLERRPYEDQGLG	46.1286	U	R.RPY#EDQGLGETTPLTIICQPM*QPLR.V	1	0	0	0	0	0	0	0	0	0	0	0	0		0	0	0	0	0	0	0	0	0	0	0	0	0	0	0	0	0	0	0	0	0	0	0
936	sp|A1X283|SPD2B_HUMAN	SH3PXD2B	SPD2B_HUMAN SH3 and PX domain-containing protein 2B	157	PMVLEQYVVVANY	19.6069	R	K.SGGDQTSVDPM*VLEQY#VVVANYQK.Q	1	0	0	0	0	0	0	0	0	0	0	0	0		0	0	0	0	0	0	0	0	0	0	0	0	0	0	0	0	0	0	0	0	0	0	0
970	sp|Q6S5L8|SHC4_HUMAN	SHC4	SHC4_HUMAN SHC-transforming protein 4	465	LFDDPCYINTQAL	57.7111	R	R.VDLFDDPCY#INTQALQSTPGSAGNQR.S	1	0	0	0	0	0	0	0	0	0	0	0	0		0	0	0	0	0	0	0	0	0	0	0	0	0	0	0	0	0	0	0	0	0	0	0
995	sp|P14618-2|KPYM_HUMAN	PKM	KPYM_HUMAN Isoform M1 of Pyruvate kinase PKM	370	ETAKGDYPLEAVR	1000	R	K.GDY#PLEAVR.M	1	0	0	0	0	0	0	0	0	0	0	0	0		0	0	0	0	0	0	0	0	0	0	0	0	0	0	0	0	0	0	0	0	0	0	0
1009	sp|Q9UJM3|ERRFI_HUMAN	ERRFI1	ERRFI_HUMAN ERBB receptor feedback inhibitor 1	395	VSSTHYYLLPERP	27.1205	U	K.VSSTHY#Y#LLPERPPYLDK.Y	1	0	0	0	0	0	0	0	0	0	0	0	0		0	0	0	0	0	0	0	0	0	0	0	0	0	0	0	0	0	0	0	0	0	0	0
1019	sp|Q14247|SRC8_HUMAN	CTTN	SRC8_HUMAN Src substrate cortactin	289	AAVGFDYKEKLAK	78.1557	U	R.QDSAAVGFDY#K.E	1	0	0	0	0	0	0	0	0	0	0	0	0		0	0	0	0	0	0	0	0	0	0	0	0	0	0	0	0	0	0	0	0	0	0	0
1064	sp|O60547|GMDS_HUMAN	GMDS	GMDS_HUMAN GDP-mannose 4,6 dehydratase	231	RSVAKIYLGQLEC	26.0454	R	K.IY#LGQLECFSLGNLDAK.R	1	0	0	0	0	0	0	0	0	0	0	0	0		0	0	0	0	0	0	0	0	0	0	0	0	0	0	0	0	0	0	0	0	0	0	0
1075	sp|Q8ND56-2|LS14A_HUMAN	LSM14A	LS14A_HUMAN Isoform 2 of Protein LSM14 homolog A	192	LDPLRKSPTMEQA	14.966	R	K.S#PTMEQAVQTASAHLPAPAAVGR.R	2	0	0	0	0	0	0	0	0	0	0	0	0		0	0	0	0	0	0	0	0	0	0	0	0	0	0	0	0	0	0	0	0	0	0	0
1136	sp|O75821|EIF3G_HUMAN	EIF3G	EIF3G_HUMAN Eukaryotic translation initiation factor 3 subunit G	42	LATGDTSPEPELL	17.0091	R	K.GIPLATGDTS#PEPELLPGAPLPPPK.E	1	0	0	0	0	0	0	0	0	0	0	0	0		0	0	0	0	0	0	0	0	0	0	0	0	0	0	0	0	0	0	0	0	0	0	0
1141	sp|Q5VWQ8|DAB2P_HUMAN	DAB2IP	DAB2P_HUMAN Disabled homolog 2-interacting protein	833	SFQNPVYQMAAGL	16.9639	R	R.AGQTPTTPGTSEGAPGRPQLLAPLSFQNPVY#QMAAGLPLSPR.G	1	0	0	0	0	0	0	0	0	0	0	0	0		0	0	0	0	0	0	0	0	0	0	0	0	0	0	0	0	0	0	0	0	0	0	0
1150	sp|P27361|MK03_HUMAN	MAPK3	MK03_HUMAN Mitogen-activated protein kinase 3	202	DHTGFLTEYVATR	27.1205	R	R.IADPEHDHTGFLT#EY#VATR.W	1	0	0	0	0	0	0	0	0	0	0	0	0		0	0	0	0	0	0	0	0	0	0	0	0	0	0	0	0	0	0	0	0	0	0	0
1162	sp|Q99959|PKP2_HUMAN	PKP2	PKP2_HUMAN Plakophilin-2	597	RGTIADYQPDDKA	97.7479	R	R.GTIADY#QPDDK.A	1	0	0	0	0	0	0	0	0	0	0	0	0		0	0	0	0	0	0	0	0	0	0	0	0	0	0	0	0	0	0	0	0	0	0	0
1164	sp|Q99959|PKP2_HUMAN	PKP2	PKP2_HUMAN Plakophilin-2	86	TSSVPEYVYNLHL	20.1669	R	R.TSSVPEY#VYNLHLVENDFVGGR.S	1	0	0	0	0	0	0	0	0	0	0	0	0		0	0	0	0	0	0	0	0	0	0	0	0	0	0	0	0	0	0	0	0	0	0	0
1263	sp|Q8N5J2-3|FA63A_HUMAN	FAM63A	FA63A_HUMAN Isoform 3 of Protein FAM63A	472	QLQQEEYQQQQAA	45.653	R	R.GPLGLTDLELAQQLQQEEY#QQQQAAQPVR.M	1	0	0	0	0	0	0	0	0	0	0	0	0		0	0	0	0	0	0	0	0	0	0	0	0	0	0	0	0	0	0	0	0	0	0	0
1290	sp|P17174|AATC_HUMAN	GOT1	AATC_HUMAN Aspartate aminotransferase, cytoplasmic	71	NSLNHEYLPILGL	60.3582	R	K.IANDNSLNHEY#LPILGLAEFR.S	1	0	0	0	0	0	0	0	0	0	0	0	0		0	0	0	0	0	0	0	0	0	0	0	0	0	0	0	0	0	0	0	0	0	0	0
1293	sp|P13797|PLST_HUMAN	PLS3	PLST_HUMAN Plastin-3	35	NGFICDYELHELF	30.6867	R	K.VDLNSNGFICDY#ELHELFK.E	1	0	0	0	0	0	0	0	0	0	0	0	0		0	0	0	0	0	0	0	0	0	0	0	0	0	0	0	0	0	0	0	0	0	0	0
1320	sp|Q86X29|LSR_HUMAN	LSR	LSR_HUMAN Lipolysis-stimulated lipoprotein receptor	616	EEEEAYYPPAPPP	30.8348	R	K.EEEEEAYY#PPAPPPYSETDSQASR.E	1	0	0	0	0	0	0	0	0	0	0	0	0		0	0	0	0	0	0	0	0	0	0	0	0	0	0	0	0	0	0	0	0	0	0	0
1364	sp|Q9BZL6|KPCD2_HUMAN	PRKD2	KPCD2_HUMAN Serine/threonine-protein kinase D2	710	EKSFRRSVVGTPA	14.0618	R	R.S#VVGTPAYLAPEVLLNQGYNR.S	1	0	0	0	0	0	0	0	0	0	0	0	0		0	0	0	0	0	0	0	0	0	0	0	0	0	0	0	0	0	0	0	0	0	0	0
1368	sp|O14828|SCAM3_HUMAN	SCAMP3	SCAM3_HUMAN Secretory carrier-associated membrane protein 3	53	REPPPAYEPPAPA	102.531	U	R.EPPPAY#EPPAPAPLPPPSAPSLQPSR.K	1	0	0	0	0	0	0	0	0	0	0	0	0		0	0	0	0	0	0	0	0	0	0	0	0	0	0	0	0	0	0	0	0	0	0	0
1397	sp|Q8IYB3|SRRM1_HUMAN	SRRM1	SRRM1_HUMAN Serine/arginine repetitive matrix protein 1	406	RPSPPATPPPKTR	1000	R	R.HRPS#PPAT#PPPK.T	1	0	0	0	0	0	0	0	0	0	0	0	0		0	0	0	0	0	0	0	0	0	0	0	0	0	0	0	0	0	0	0	0	0	0	0
1416	sp|Q9UQC2|GAB2_HUMAN	GAB2	GAB2_HUMAN GRB2-associated-binding protein 2	324	ATPLSAYQIPRTF	13.3795	R	R.EFGDLLVDNM*DVPATPLSAY#QIPR.T	1	0	0	0	0	0	0	0	0	0	0	0	0		0	0	0	0	0	0	0	0	0	0	0	0	0	0	0	0	0	0	0	0	0	0	0
1444	sp|P15941-2|MUC1_HUMAN	MUC1	MUC1_HUMAN Isoform 2 of Mucin-1	1252	GGSSLSYTNPAVA	24.437	R	K.VSAGNGGSSLSY#TNPAVAATSANL.-	1	0	0	0	0	0	0	0	0	0	0	0	0		0	0	0	0	0	0	0	0	0	0	0	0	0	0	0	0	0	0	0	0	0	0	0
1486	sp|Q9NY33|DPP3_HUMAN	DPP3	DPP3_HUMAN Dipeptidyl peptidase 3	417	NVLAVAYATQREK	20.1669	R	K.NVSLGNVLAVAY#ATQR.E	1	0	0	0	0	0	0	0	0	0	0	0	0		0	0	0	0	0	0	0	0	0	0	0	0	0	0	0	0	0	0	0	0	0	0	0
1496	sp|P61978-2|HNRPK_HUMAN	HNRNPK	HNRPK_HUMAN Isoform 2 of Heterogeneous nuclear ribonucleoprotein K	449	QIQNAQYLLQNSV	34.7683	R	R.IITITGTQDQIQNAQY#LLQNSVK.Q	1	0	0	0	0	0	0	0	0	0	0	0	0		0	0	0	0	0	0	0	0	0	0	0	0	0	0	0	0	0	0	0	0	0	0	0
1509	sp|Q15283|RASA2_HUMAN	RASA2	RASA2_HUMAN Ras GTPase-activating protein 2	226	QFNEIFYFEVTRS	82.3868	R	K.TSNPQFNEIFY#FEVTR.S	2	0	0	0	0	0	0	0	0	0	0	0	0		0	0	0	0	0	0	0	0	0	0	0	0	0	0	0	0	0	0	0	0	0	0	0
1512	sp|P55072|TERA_HUMAN	VCP	TERA_HUMAN Transitional endoplasmic reticulum ATPase	644	RLDQLIYIPLPDE	1000	U	R.LDQLIY#IPLPDEK.S	1	0	0	0	0	0	0	0	0	0	0	0	0		0	0	0	0	0	0	0	0	0	0	0	0	0	0	0	0	0	0	0	0	0	0	0
1513	sp|P55072|TERA_HUMAN	VCP	TERA_HUMAN Transitional endoplasmic reticulum ATPase	173	ETDPSPYCIVAPD	13.3795	R	K.VVETDPSPY#CIVAPDTVIHCEGEPIK.R	1	0	0	0	0	0	0	0	0	0	0	0	0		0	0	0	0	0	0	0	0	0	0	0	0	0	0	0	0	0	0	0	0	0	0	0
1522	sp|Q86V48|LUZP1_HUMAN	LUZP1	LUZP1_HUMAN Leucine zipper protein 1	799	TSSITIYPSDSSS	17.0091	R	K.VTSSITIY#PSDSSSPR.A	1	0	0	0	0	0	0	0	0	0	0	0	0		0	0	0	0	0	0	0	0	0	0	0	0	0	0	0	0	0	0	0	0	0	0	0
1525	sp|Q14980|NUMA1_HUMAN	NUMA1	NUMA1_HUMAN Nuclear mitotic apparatus protein 1	1225	EAERKNSLISSLE	33.6572	R	R.KNS#LISSLEEEVSILNR.Q	1	0	0	0	0	0	0	0	0	0	0	0	0		0	0	0	0	0	0	0	0	0	0	0	0	0	0	0	0	0	0	0	0	0	0	0
1526	sp|Q14980|NUMA1_HUMAN	NUMA1	NUMA1_HUMAN Nuclear mitotic apparatus protein 1	1774	ESLESLYFTPIPA	31.2747	R	K.VESLESLY#FTPIPAR.S	1	0	0	0	0	0	0	0	0	0	0	0	0		0	0	0	0	0	0	0	0	0	0	0	0	0	0	0	0	0	0	0	0	0	0	0
1533	sp|P50395|GDIB_HUMAN	GDI2	GDIB_HUMAN Rab GDP dissociation inhibitor beta	229	PYLYPLYGLGELP	33.6572	R	K.SPYLYPLY#GLGELPQGFAR.L	1	0	0	0	0	0	0	0	0	0	0	0	0		0	0	0	0	0	0	0	0	0	0	0	0	0	0	0	0	0	0	0	0	0	0	0
1563	sp|O00459|P85B_HUMAN	PIK3R2	P85B_HUMAN Phosphatidylinositol 3-kinase regulatory subunit beta	577	RKIRDQYLVWLTQ	84.3587	U	K.IRDQY#LVWLTQK.G	1	0	0	0	0	0	0	0	0	0	0	0	0		0	0	0	0	0	0	0	0	0	0	0	0	0	0	0	0	0	0	0	0	0	0	0
1572	sp|Q9UER7|DAXX_HUMAN	DAXX	DAXX_HUMAN Death domain-associated protein 6	671	TLPSPPSPLASLA	15.0073	R	K.ICTLPSPPS#PLASLAPVADSSTR.V	1	0	0	0	0	0	0	0	0	0	0	0	0		0	0	0	0	0	0	0	0	0	0	0	0	0	0	0	0	0	0	0	0	0	0	0
1591	sp|Q15262-3|PTPRK_HUMAN	PTPRK	PTPRK_HUMAN Isoform 3 of Receptor-type tyrosine-protein phosphatase kappa	859	EGTESPYQTGQLH	20.1669	R	R.YLCEGTESPY#QTGQLHPAIR.V	1	0	0	0	0	0	0	0	0	0	0	0	0		0	0	0	0	0	0	0	0	0	0	0	0	0	0	0	0	0	0	0	0	0	0	0
1678	sp|Q7L5N7|PCAT2_HUMAN	LPCAT2	PCAT2_HUMAN Lysophosphatidylcholine acyltransferase 2	34	MVPRQASFFPPPV	56.9556	U	R.QAS#FFPPPVPNPFVQQTQIGSAR.R	2	0	0	0	0	0	0	0	0	0	0	0	0		0	0	0	0	0	0	0	0	0	0	0	0	0	0	0	0	0	0	0	0	0	0	0
1679	sp|Q969M3-3|YIPF5_HUMAN	YIPF5	YIPF5_HUMAN Isoform 3 of Protein YIPF5	42	SKQYAGYDYSQQG	17.0091	R	K.QYAGY#DYSQQGR.F	1	0	0	0	0	0	0	0	0	0	0	0	0		0	0	0	0	0	0	0	0	0	0	0	0	0	0	0	0	0	0	0	0	0	0	0
1687	sp|P43490|NAMPT_HUMAN	NAMPT	NAMPT_HUMAN Nicotinamide phosphoribosyltransferase	453	KGDLEEYGQDLLH	86.8328	R	K.GDLEEY#GQDLLHTVFK.N	3	0	0	0	0	0	0	0	0	0	0	0	0		0	0	0	0	0	0	0	0	0	0	0	0	0	0	0	0	0	0	0	0	0	0	0
1740	sp|Q13813-2|SPTN1_HUMAN	SPTAN1	SPTN1_HUMAN Isoform 2 of Spectrin alpha chain, non-erythrocytic 1	1413	AHGHYASPEIKQK	13.3795	R	R.AGTFQAFEQFGQQLLAHGHYAS#PEIK.Q	1	0	0	0	0	0	0	0	0	0	0	0	0		0	0	0	0	0	0	0	0	0	0	0	0	0	0	0	0	0	0	0	0	0	0	0
1750	sp|P33981|TTK_HUMAN	TTK	TTK_HUMAN Dual specificity protein kinase TTK	811	TTEEMKYVLGQLV	40.1539	R	K.Y#VLGQLVGLNSPNSILK.A	1	0	0	0	0	0	0	0	0	0	0	0	0		0	0	0	0	0	0	0	0	0	0	0	0	0	0	0	0	0	0	0	0	0	0	0
1755	sp|P08107|HSP71_HUMAN	HSPA1A	HSP71_HUMAN Heat shock 70 kDa protein 1A/1B	611	PIISGLYQGAGGP	38.1888	R	K.ELEQVCNPIISGLY#QGAGGPGPGGFGAQGPK.G	1	0	0	0	0	0	0	0	0	0	0	0	0		0	0	0	0	0	0	0	0	0	0	0	0	0	0	0	0	0	0	0	0	0	0	0
1767	sp|O15446-2|RPA34_HUMAN	CD3EAP	RPA34_HUMAN Isoform 2 of DNA-directed RNA polymerase I subunit RPA34	138	LQPIPASPPPQIP	16.1979	R	R.ILEGPQQSLSGSPLQPIPAS#PPPQIPPGLRPR.F	1	0	0	0	0	0	0	0	0	0	0	0	0		0	0	0	0	0	0	0	0	0	0	0	0	0	0	0	0	0	0	0	0	0	0	0
1803	sp|Q96KP1|EXOC2_HUMAN	EXOC2	EXOC2_HUMAN Exocyst complex component 2	113	WVDEMNYYDMRTD	17.0091	R	K.IGILDQSAVWVDEMNY#YDM*R.T	1	0	0	0	0	0	0	0	0	0	0	0	0		0	0	0	0	0	0	0	0	0	0	0	0	0	0	0	0	0	0	0	0	0	0	0
1824	sp|Q76N89|HECW1_HUMAN	HECW1	HECW1_HUMAN E3 ubiquitin-protein ligase HECW1	1292	GEEGLDYSGPSRE	17.0091	R	K.LYVTFVGEEGLDY#SGPSR.E	2	0	0	0	0	0	0	0	0	0	0	0	0		0	0	0	0	0	0	0	0	0	0	0	0	0	0	0	0	0	0	0	0	0	0	0
1831	sp|Q9BZ29-4|DOCK9_HUMAN	DOCK9	DOCK9_HUMAN Isoform 4 of Dedicator of cytokinesis protein 9	340	SRVKLFYLDPDAQ	1000	R	K.LFY#LDPDAQK.L	2	0	0	0	0	0	0	0	0	0	0	0	0		0	0	0	0	0	0	0	0	0	0	0	0	0	0	0	0	0	0	0	0	0	0	0
1844	sp|O94832|MYO1D_HUMAN	MYO1D	MYO1D_HUMAN Unconventional myosin-Id	612	CRHQVEYLGLLEN	1000	R	R.HQVEY#LGLLENVR.V	1	0	0	0	0	0	0	0	0	0	0	0	0		0	0	0	0	0	0	0	0	0	0	0	0	0	0	0	0	0	0	0	0	0	0	0
1869	sp|Q15012|LAP4A_HUMAN	LAPTM4A	LAP4A_HUMAN Lysosomal-associated transmembrane protein 4A	210	FEAPPQYVLPTYE	19.8465	U	R.NVPEIAVYPAFEAPPQY#VLPTYEM*AVK.M	1	0	0	0	0	0	0	0	0	0	0	0	0		0	0	0	0	0	0	0	0	0	0	0	0	0	0	0	0	0	0	0	0	0	0	0
1870	sp|Q9Y2K6|UBP20_HUMAN	USP20	UBP20_HUMAN Ubiquitin carboxyl-terminal hydrolase 20	227	NPMFRGYAQQDTQ	65.4396	U	R.GY#AQQDTQEFLR.C	1	0	0	0	0	0	0	0	0	0	0	0	0		0	0	0	0	0	0	0	0	0	0	0	0	0	0	0	0	0	0	0	0	0	0	0
1885	sp|P16949-2|STMN1_HUMAN	STMN1	STMN1_HUMAN Isoform 2 of Stathmin	25	AFELILSPRSKES	80.7549	R	R.ASGQAFELILS#PR.S	1	0	0	0	0	0	0	0	0	0	0	0	0		0	0	0	0	0	0	0	0	0	0	0	0	0	0	0	0	0	0	0	0	0	0	0
1902	sp|P35367|HRH1_HUMAN	HRH1	HRH1_HUMAN Histamine H1 receptor	301	REVDKLYCFPLDI	135.018	U	K.LY#CFPLDIVHMQAAAEGSSR.D	1	0	0	0	0	0	0	0	0	0	0	0	0		0	0	0	0	0	0	0	0	0	0	0	0	0	0	0	0	0	0	0	0	0	0	0
1915	sp|Q00526|CDK3_HUMAN	CDK3	CDK3_HUMAN Cyclin-dependent kinase 3	14	EKIGEGTYGVVYK	97.5963	R	K.IGEGT#Y#GVVYK.A	16	0	0	0	0	0	0	0	0	0	0	0	0		0	0	0	0	0	0	0	0	0	0	0	0	0	0	0	0	0	0	0	0	0	0	0
1955	sp|P04075-2|ALDOA_HUMAN	ALDOA	ALDOA_HUMAN Isoform 2 of Fructose-bisphosphate aldolase A	414	SESLFVSNHAYxx	36.5564	R	K.YTPSGQAGAAASESLFVS#NHAY.-	1	0	0	0	0	0	0	0	0	0	0	0	0		0	0	0	0	0	0	0	0	0	0	0	0	0	0	0	0	0	0	0	0	0	0	0
1977	sp|Q5T5Y3-3|CAMP1_HUMAN	CAMSAP1	CAMP1_HUMAN Isoform 3 of Calmodulin-regulated spectrin-associated protein 1	69	PFYVDQYEQEHIK	35.7774	R	R.DNIPEDLRDPFYVDQY#EQEHIKPPVIK.L	1	0	0	0	0	0	0	0	0	0	0	0	0		0	0	0	0	0	0	0	0	0	0	0	0	0	0	0	0	0	0	0	0	0	0	0
2082	sp|Q9Y316-3|MEMO1_HUMAN	MEMO1	MEMO1_HUMAN Isoform 3 of Protein MEMO1	213	ESQGEIYRSIEHL	51.0043	R	R.YSYYDESQGEIY#R.S	1	0	0	0	0	0	0	0	0	0	0	0	0		0	0	0	0	0	0	0	0	0	0	0	0	0	0	0	0	0	0	0	0	0	0	0
2085	sp|P21709|EPHA1_HUMAN	EPHA1	EPHA1_HUMAN Ephrin type-A receptor 1	599	KLWLKPYVDLQAY	76.0346	U	K.LWLKPY#VDLQAYEDPAQGALDFTR.E	1	0	0	0	0	0	0	0	0	0	0	0	0		0	0	0	0	0	0	0	0	0	0	0	0	0	0	0	0	0	0	0	0	0	0	0
2086	sp|Q8WUA4|TF3C2_HUMAN	GTF3C2	TF3C2_HUMAN General transcription factor 3C polypeptide 2	892	NAMFQPSSPTRRP	17.0091	R	R.AHFNAMFQPS#SPTR.R	1	0	0	0	0	0	0	0	0	0	0	0	0		0	0	0	0	0	0	0	0	0	0	0	0	0	0	0	0	0	0	0	0	0	0	0
2103	sp|Q676U5|A16L1_HUMAN	ATG16L1	A16L1_HUMAN Autophagy-related protein 16-1	269	AATKRLSQPAGGL	43.6045	R	K.RLS#QPAGGLLDSITNIFGR.R	1	0	0	0	0	0	0	0	0	0	0	0	0		0	0	0	0	0	0	0	0	0	0	0	0	0	0	0	0	0	0	0	0	0	0	0
2136	sp|Q9H4L4|SENP3_HUMAN	SENP3	SENP3_HUMAN Sentrin-specific protease 3	169	HPKNHLSPQQGGA	37.549	R	K.NHLS#PQQGGATPQVPSPCCR.F	1	0	0	0	0	0	0	0	0	0	0	0	0		0	0	0	0	0	0	0	0	0	0	0	0	0	0	0	0	0	0	0	0	0	0	0
2138	sp|O15145|ARPC3_HUMAN	ARPC3	ARPC3_HUMAN Actin-related protein 2/3 complex subunit 3	47	IVDEAIYYFKANV	17.0091	R	K.DTDIVDEAIY#YFK.A	1	0	0	0	0	0	0	0	0	0	0	0	0		0	0	0	0	0	0	0	0	0	0	0	0	0	0	0	0	0	0	0	0	0	0	0
2151	sp|Q9BUP0|EFHD1_HUMAN	EFHD1	EFHD1_HUMAN EF-hand domain-containing protein D1	81	CRVFNPYTEFPEF	48.8739	R	R.VFNPY#TEFPEFSR.R	1	0	0	0	0	0	0	0	0	0	0	0	0		0	0	0	0	0	0	0	0	0	0	0	0	0	0	0	0	0	0	0	0	0	0	0
2184	sp|P62805|H4_HUMAN	HIST1H4A	H4_HUMAN Histone H4	89	TAMDVVYALKRQG	104.477	U	K.TVTAMDVVY#ALK.R	2	0	0	0	0	0	0	0	0	0	0	0	0		0	0	0	0	0	0	0	0	0	0	0	0	0	0	0	0	0	0	0	0	0	0	0
2203	sp|Q969W9|PMEPA_HUMAN	PMEPA1	PMEPA_HUMAN Transmembrane prostate androgen-induced protein	219	GISATCYGSGGRM	17.0091	R	R.LGGPCPPSSNSGISATCY#GSGGR.M	1	0	0	0	0	0	0	0	0	0	0	0	0		0	0	0	0	0	0	0	0	0	0	0	0	0	0	0	0	0	0	0	0	0	0	0
2217	sp|O43639|NCK2_HUMAN	NCK2	NCK2_HUMAN Cytoplasmic protein NCK2	99	PSTDAEYPANGSG	39.6629	R	R.DASPTPSTDAEY#PANGSGADR.I	1	0	0	0	0	0	0	0	0	0	0	0	0		0	0	0	0	0	0	0	0	0	0	0	0	0	0	0	0	0	0	0	0	0	0	0
2226	sp|O15344|TRI18_HUMAN	MID1	TRI18_HUMAN E3 ubiquitin-protein ligase Midline-1	378	LLECLDYLTAPNP	44.2778	R	K.LLECLDY#LTAPNPPTIR.E	1	0	0	0	0	0	0	0	0	0	0	0	0		0	0	0	0	0	0	0	0	0	0	0	0	0	0	0	0	0	0	0	0	0	0	0
2270	sp|P54753|EPHB3_HUMAN	EPHB3	EPHB3_HUMAN Ephrin type-B receptor 3	608	APGMKVYIDPFTY	34.0887	R	K.VY#IDPFTYEDPNEAVR.E	1	0	0	0	0	0	0	0	0	0	0	0	0		0	0	0	0	0	0	0	0	0	0	0	0	0	0	0	0	0	0	0	0	0	0	0
2282	sp|P41227|NAA10_HUMAN	NAA10	NAA10_HUMAN N-alpha-acetyltransferase 10	137	SEVEPKYYADGED	24.437	R	K.Y#YADGEDAYAM*K.R	1	0	0	0	0	0	0	0	0	0	0	0	0		0	0	0	0	0	0	0	0	0	0	0	0	0	0	0	0	0	0	0	0	0	0	0
2331	sp|P51610-4|HCFC1_HUMAN	HCFC1	HCFC1_HUMAN Isoform 4 of Host cell factor 1	411	TAATATSPTPNPV	20.1669	R	K.YDIPATAATATS#PTPNPVPSVPANPPK.S	1	0	0	0	0	0	0	0	0	0	0	0	0		0	0	0	0	0	0	0	0	0	0	0	0	0	0	0	0	0	0	0	0	0	0	0
2358	sp|Q9HC35|EMAL4_HUMAN	EML4	EMAL4_HUMAN Echinoderm microtubule-associated protein-like 4	226	INQEGEYIKMFMR	1000	R	K.DVIINQEGEY#IK.M	2	0	0	0	0	0	0	0	0	0	0	0	0		0	0	0	0	0	0	0	0	0	0	0	0	0	0	0	0	0	0	0	0	0	0	0
2364	sp|P54136|SYRC_HUMAN	RARS	SYRC_HUMAN Arginine--tRNA ligase, cytoplasmic	536	TAAYLLYAFTRIR	42.8692	R	R.GNTAAYLLY#AFTR.I	1	0	0	0	0	0	0	0	0	0	0	0	0		0	0	0	0	0	0	0	0	0	0	0	0	0	0	0	0	0	0	0	0	0	0	0
2368	sp|Q96B36-3|AKTS1_HUMAN	AKT1S1	AKTS1_HUMAN Isoform 3 of Proline-rich AKT1 substrate 1	203	TQQYAKSLPVSVP	31.2747	R	K.S#LPVSVPVWGFK.E	1	0	0	0	0	0	0	0	0	0	0	0	0		0	0	0	0	0	0	0	0	0	0	0	0	0	0	0	0	0	0	0	0	0	0	0
2371	sp|Q86T03-2|TM55B_HUMAN	TMEM55B	TM55B_HUMAN Isoform 2 of Type 1 phosphatidylinositol 4,5-bisphosphate 4-phosphatase	169	VHPGPLSPEPQPM	1000	R	R.IINLGPVHPGPLS#PEPQPMGVR.V	1	0	0	0	0	0	0	0	0	0	0	0	0		0	0	0	0	0	0	0	0	0	0	0	0	0	0	0	0	0	0	0	0	0	0	0
2400	sp|P29323|EPHB2_HUMAN	EPHB2	EPHB2_HUMAN Ephrin type-B receptor 2	596	TPGMKIYIDPFTY	22.4917	R	K.IY#IDPFTYEDPNEAVR.E	1	0	0	0	0	0	0	0	0	0	0	0	0		0	0	0	0	0	0	0	0	0	0	0	0	0	0	0	0	0	0	0	0	0	0	0
2422	sp|Q14644|RASA3_HUMAN	RASA3	RASA3_HUMAN Ras GTPase-activating protein 3	66	FYGEDFYCEIPRS	60.3582	R	K.SLCPFYGEDFY#CEIPR.S	1	0	0	0	0	0	0	0	0	0	0	0	0		0	0	0	0	0	0	0	0	0	0	0	0	0	0	0	0	0	0	0	0	0	0	0
2423	sp|Q14644|RASA3_HUMAN	RASA3	RASA3_HUMAN Ras GTPase-activating protein 3	199	QFDEVFYFEVTRP	15.5899	R	K.TNNPQFDEVFY#FEVTRPCSYSK.K	1	0	0	0	0	0	0	0	0	0	0	0	0		0	0	0	0	0	0	0	0	0	0	0	0	0	0	0	0	0	0	0	0	0	0	0
2449	sp|Q9Y6M4-2|KC1G3_HUMAN	CSNK1G3	KC1G3_HUMAN Isoform 2 of Casein kinase I isoform gamma-3	65	LGKNLYTNEYVAI	13.3795	R	K.NLYT#NEYVAIK.L	1	0	0	0	0	0	0	0	0	0	0	0	0		0	0	0	0	0	0	0	0	0	0	0	0	0	0	0	0	0	0	0	0	0	0	0
2461	sp|Q8WUM0|NU133_HUMAN	NUP133	NU133_HUMAN Nuclear pore complex protein Nup133	50	SSPVLFSPVGRRS	49.5899	R	K.GLPLGSAVSSPVLFS#PVGR.R	1	0	0	0	0	0	0	0	0	0	0	0	0		0	0	0	0	0	0	0	0	0	0	0	0	0	0	0	0	0	0	0	0	0	0	0
2487	sp|O60292|SI1L3_HUMAN	SIPA1L3	SI1L3_HUMAN Signal-induced proliferation-associated 1-like protein 3	1411	MGSRVGYPAQVYK	65.4396	R	R.VGY#PAQVYK.T	1	0	0	0	0	0	0	0	0	0	0	0	0		0	0	0	0	0	0	0	0	0	0	0	0	0	0	0	0	0	0	0	0	0	0	0
2491	sp|Q99729-2|ROAA_HUMAN	HNRNPAB	ROAA_HUMAN Isoform 2 of Heterogeneous nuclear ribonucleoprotein A/B	235	AQPKEVYQQQQYG	38.1888	R	K.EVY#QQQQYGSGGR.G	1	0	0	0	0	0	0	0	0	0	0	0	0		0	0	0	0	0	0	0	0	0	0	0	0	0	0	0	0	0	0	0	0	0	0	0
2518	sp|P46781|RS9_HUMAN	RPS9	RS9_HUMAN 40S ribosomal protein S9	96	GKMKLDYILGLKI	1000	R	K.LDY#ILGLK.I	1	0	0	0	0	0	0	0	0	0	0	0	0		0	0	0	0	0	0	0	0	0	0	0	0	0	0	0	0	0	0	0	0	0	0	0
2524	sp|P52735|VAV2_HUMAN	VAV2	VAV2_HUMAN Guanine nucleotide exchange factor VAV2	142	ENDDDVYRSLEEL	50.7033	R	K.GIRPFPSEETTENDDDVY#R.S	1	0	0	0	0	0	0	0	0	0	0	0	0		0	0	0	0	0	0	0	0	0	0	0	0	0	0	0	0	0	0	0	0	0	0	0
2541	sp|Q9C0C2|TB182_HUMAN	TNKS1BP1	TB182_HUMAN 182 kDa tankyrase-1-binding protein	1545	QTSRRPSQGPPAR	1000	U	R.RPS#QGPPAR.S	1	0	0	0	0	0	0	0	0	0	0	0	0		0	0	0	0	0	0	0	0	0	0	0	0	0	0	0	0	0	0	0	0	0	0	0
2542	sp|Q9C0C2|TB182_HUMAN	TNKS1BP1	TB182_HUMAN 182 kDa tankyrase-1-binding protein	1652	NLFPGLSPSALKA	31.2747	U	K.VNLFPGLS#PSALK.A	1	0	0	0	0	0	0	0	0	0	0	0	0		0	0	0	0	0	0	0	0	0	0	0	0	0	0	0	0	0	0	0	0	0	0	0
2575	sp|Q92600|RCD1_HUMAN	RQCD1	RCD1_HUMAN Cell differentiation protein RCD1 homolog	23	VDREKIYQWINEL	65.2463	R	K.IY#QWINELSSPETR.E	1	0	0	0	0	0	0	0	0	0	0	0	0		0	0	0	0	0	0	0	0	0	0	0	0	0	0	0	0	0	0	0	0	0	0	0
2596	sp|P31350-2|RIR2_HUMAN	RRM2	RIR2_HUMAN Isoform 2 of Ribonucleoside-diphosphate reductase subunit M2	80	PQQLQLSPLKGLS	49.4182	R	R.VPLAPITDPQQLQLS#PLK.G	1	0	0	0	0	0	0	0	0	0	0	0	0		0	0	0	0	0	0	0	0	0	0	0	0	0	0	0	0	0	0	0	0	0	0	0
2607	sp|Q5T1M5|FKB15_HUMAN	FKBP15	FKB15_HUMAN FK506-binding protein 15	960	RPSQEQSASASSG	18.8054	R	R.RPSQEQS#ASASSGQPQAPLNR.E	1	0	0	0	0	0	0	0	0	0	0	0	0		0	0	0	0	0	0	0	0	0	0	0	0	0	0	0	0	0	0	0	0	0	0	0
2617	sp|P47813|IF1AX_HUMAN	EIF1AX	IF1AX_HUMAN Eukaryotic translation initiation factor 1A, X-chromosomal	106	ARSLKAYGELPEH	1000	R	K.AY#GELPEHAK.I	1	0	0	0	0	0	0	0	0	0	0	0	0		0	0	0	0	0	0	0	0	0	0	0	0	0	0	0	0	0	0	0	0	0	0	0
2721	sp|Q9ULE0|WWC3_HUMAN	WWC3	WWC3_HUMAN Protein WWC3	57	ELAQEEYQQLHKM	1000	R	R.FELAQEEY#QQLHK.M	1	0	0	0	0	0	0	0	0	0	0	0	0		0	0	0	0	0	0	0	0	0	0	0	0	0	0	0	0	0	0	0	0	0	0	0
2761	sp|Q14258|TRI25_HUMAN	TRIM25	TRI25_HUMAN E3 ubiquitin/ISG15 ligase TRIM25	278	SKFDTIYQILLKK	17.0091	U	K.FDTIY#QILLK.K	1	0	0	0	0	0	0	0	0	0	0	0	0		0	0	0	0	0	0	0	0	0	0	0	0	0	0	0	0	0	0	0	0	0	0	0
2768	sp|O75830|SPI2_HUMAN	SERPINI2	SPI2_HUMAN Serpin I2	184	VLVNAIYFKGDWK	1000	R	R.LVLVNAIY#FK.G	1	0	0	0	0	0	0	0	0	0	0	0	0		0	0	0	0	0	0	0	0	0	0	0	0	0	0	0	0	0	0	0	0	0	0	0
2785	sp|Q8NFH8|REPS2_HUMAN	REPS2	REPS2_HUMAN RalBP1-associated Eps domain-containing protein 2	212	VPLSHGYSKLRSS	17.0091	R	R.VPLSHGY#SK.L	1	0	0	0	0	0	0	0	0	0	0	0	0		0	0	0	0	0	0	0	0	0	0	0	0	0	0	0	0	0	0	0	0	0	0	0
2792	sp|Q15056|IF4H_HUMAN	EIF4H	IF4H_HUMAN Eukaryotic translation initiation factor 4H	86	KFKGFCYVEFDEV	58.4333	R	K.GFCY#VEFDEVDSLK.E	1	0	0	0	0	0	0	0	0	0	0	0	0		0	0	0	0	0	0	0	0	0	0	0	0	0	0	0	0	0	0	0	0	0	0	0
2819	sp|P12830|CADH1_HUMAN	CDH1	CADH1_HUMAN Cadherin-1	876	KKLADMYGGGEDD	1000	R	K.LADM*Y#GGGEDD.-	1	0	0	0	0	0	0	0	0	0	0	0	0		0	0	0	0	0	0	0	0	0	0	0	0	0	0	0	0	0	0	0	0	0	0	0
2847	sp|Q15942|ZYX_HUMAN	ZYX	ZYX_HUMAN Zyxin	344	NQNQVRSPGAPGP	47.0452	R	R.S#PGAPGPLTLK.E	1	0	0	0	0	0	0	0	0	0	0	0	0		0	0	0	0	0	0	0	0	0	0	0	0	0	0	0	0	0	0	0	0	0	0	0
2872	sp|Q6NZY4|ZCHC8_HUMAN	ZCCHC8	ZCHC8_HUMAN Zinc finger CCHC domain-containing protein 8	479	PPLPRGTPPPVFT	18.9783	R	R.GT#PPPVFTPPLPK.G	1	0	0	0	0	0	0	0	0	0	0	0	0		0	0	0	0	0	0	0	0	0	0	0	0	0	0	0	0	0	0	0	0	0	0	0
2882	sp|O95238|SPDEF_HUMAN	SPDEF	SPDEF_HUMAN SAM pointed domain-containing Ets transcription factor	329	ISQRLVYQFVHPI	1000	R	R.LVY#QFVHPI.-	1	0	0	0	0	0	0	0	0	0	0	0	0		0	0	0	0	0	0	0	0	0	0	0	0	0	0	0	0	0	0	0	0	0	0	0
2884	sp|Q5VV41|ARHGG_HUMAN	ARHGEF16	ARHGG_HUMAN Rho guanine nucleotide exchange factor 16	107	TPARHQSFGAAVL	38.7758	U	R.HQS#FGAAVLSR.E	1	0	0	0	0	0	0	0	0	0	0	0	0		0	0	0	0	0	0	0	0	0	0	0	0	0	0	0	0	0	0	0	0	0	0	0

## Sheet: Normalized&Scaled
Site_id	Protein Id	Gene symbol	Protein description	Site Position	Motif	Max Score	Redundancy	Sequence	Spectral_counts	Num_quant	Normalized and Scaled per Site
											-0	-5	-10	-30	0	5	10	30	WO 5	WO 10	WO 30
1170	sp|P49840|GSK3A_HUMAN	GSK3A	GSK3A_HUMAN Glycogen synthase kinase-3 alpha	279	GEPNVSYICSRYY	30.8348	R	R.GEPNVSY#ICSR.Y	9	9	15.3933	9.0715	9.4931	8.73632	16.7182	9.60137	9.56181	7.58766	5.10154	3.91967	4.8155
416	sp|Q05655|KPCD_HUMAN	PRKCD	KPCD_HUMAN Protein kinase C delta type	313	SEPVGIYQGFEKK	154.095	R	R.RSDSASSEPVGIY#QGFEK.K	12	7	19.0332	8.21529	7.32804	5.79149	17.9355	9.40668	8.37192	8.46337	5.08772	3.97689	6.38983
510	sp|Q9H5V8|CDCP1_HUMAN	CDCP1	CDCP1_HUMAN CUB domain-containing protein 1	707	GPAVGIYNDNINT	138.848	R	K.GPAVGIY#NDNINTEM*PR.Q	13	11	19.2125	7.64292	7.29746	7.84745	17.621	7.18633	7.18566	7.09559	5.84274	4.77	8.29827
353	sp|P00533|EGFR_HUMAN	EGFR	EGFR_HUMAN Epidermal growth factor receptor	1197	TAENAEYLRVAPQ	154.095	R	K.GSTAENAEY#LR.V	25	23	4.90886	12.1637	12.0688	9.19167	5.2869	7.94697	5.31632	5.68426	11.599	14.6583	11.1752
2339	sp|Q9H1E3|NUCKS_HUMAN	NUCKS1	NUCKS_HUMAN Nuclear ubiquitous casein and cyclin-dependent kinase substrate 1	181	KATVTPSPVKGKG	30.8348	R	K.ATVTPS#PVK.G	1	1	18.6118	10.5804	8.95081	8.62859	17.4253	8.74183	9.46703	8.5897	4.16952	2.08074	2.75431
2057	sp|Q05397-5|FAK1_HUMAN	PTK2	FAK1_HUMAN Isoform 5 of Focal adhesion kinase 1	570	DFGLSRYMEDSTY	81.6917	R	R.Y#MEDSTYYK.A	2	2	16.534	9.42235	9.83081	8.39991	16.0488	9.44848	9.67336	8.02449	5.06875	3.45781	4.0913
1973	sp|O95297|MPZL1_HUMAN	MPZL1	MPZL1_HUMAN Myelin protein zero-like protein 1	263	KSESVVYADIRKN	53.5337	R	K.SESVVY#ADIRK.N	3	3	16.2996	16.1916	17.6274	16.5602	4.62311	4.5316	3.80318	3.06992	5.36114	6.43078	5.50145
2683	sp|P16070|CD44_HUMAN	CD44	CD44_HUMAN CD44 antigen	706	NGEASKSQEMVHL	1000	R	K.S#QEM*VHLVNK.E	2	2	20.0533	10.1118	8.78432	5.60862	17.7612	10.251	8.85495	5.09385	5.00057	4.19175	4.28865
1913	sp|Q00526|CDK3_HUMAN	CDK3	CDK3_HUMAN Cyclin-dependent kinase 3	19	GTYGVVYKAKNRE	150.768	R	K.IGEGTYGVVY#K.A	2	2	16.8601	9.73406	10.041	8.10445	17.1741	9.96289	9.45594	7.55667	3.88521	3.40978	3.81584
753	sp|Q16539|MK14_HUMAN	MAPK14	MK14_HUMAN Mitogen-activated protein kinase 14	182	DDEMTGYVATRWY	65.4396	R	R.HTDDEM*T#GY#VATR.W	9	3	15.9648	11.0705	7.60425	7.52899	18.5118	4.86805	3.11986	2.70515	8.88725	10.2655	9.474
800	sp|P08493-2|MGP_HUMAN	MGP	MGP_HUMAN Isoform 2 of Matrix Gla protein	107	YRLCERYAMVYGY	97.7479	R	R.Y#AM*VYGYNAAYNR.Y	7	6	15.5592	10.3957	10.3139	9.08887	12.4907	10.2388	12.2686	7.92763	4.26434	3.70204	3.75005
1582	sp|P08238|HS90B_HUMAN	HSP90AB1	HS90B_HUMAN Heat shock protein HSP 90-beta	226	EREKEISDDEAEE	1000	R	K.EIS#DDEAEEEK.G	2	2	15.1687	8.96578	9.32777	8.64264	16.7512	9.2279	9.23084	7.80609	5.61047	4.23002	5.03863
474	sp|Q9Y490|TLN1_HUMAN	TLN1	TLN1_HUMAN Talin-1	26	EPSTMVYDACRII	87.265	R	K.TM*QFEPSTMVY#DACR.I	8	7	10.9403	7.37625	8.36294	9.21266	11.6118	9.12816	10.1739	13.9452	6.84236	5.41519	6.99131
417	sp|Q05655|KPCD_HUMAN	PRKCD	KPCD_HUMAN Protein kinase C delta type	334	QDNSGTYGKIWEG	24.437	U	K.TGVAGEDM*QDNSGTY#GK.I	2	2	15.0502	7.97823	8.08827	8.42052	14.348	6.77449	5.97177	4.82483	7.28466	9.85121	11.4078
1583	sp|P08238|HS90B_HUMAN	HSP90AB1	HS90B_HUMAN Heat shock protein HSP 90-beta	255	KIEDVGSDEEDDS	110.633	R	K.IEDVGS#DEEDDSGK.D	2	2	15.4227	9.264	8.56127	8.45209	15.4417	9.54564	10.5091	8.25926	5.47417	4.02778	5.0423
450	sp|P18433|PTPRA_HUMAN	PTPRA	PTPRA_HUMAN Receptor-type tyrosine-protein phosphatase alpha	798	IDAFSDYANFKxx	44.2778	R	K.VVQEYIDAFSDY#ANFK.-	19	5	12.8797	8.49107	8.93841	6.9012	12.3381	11.3216	11.7655	8.31785	7.66821	5.97755	5.40082
1470	sp|Q5VTE0|EF1A3_HUMAN	EEF1A1P5	EF1A3_HUMAN Putative elongation factor 1-alpha-like 3	141	EHALLAYTLGVKQ	30.8348	R	R.EHALLAY#TLGVK.Q	1	1	16.6484	9.4132	9.80514	7.78052	15.7379	10.0925	9.34599	8.12005	4.5496	3.43687	5.06975
1828	sp|Q8N0Y7|PGAM4_HUMAN	PGAM4	PGAM4_HUMAN Probable phosphoglycerate mutase 4	92	RLNERHYGGLTGL	27.1205	R	R.HY#GGLTGLNK.A	1	1	16.4955	9.97804	8.76116	7.90351	18.2216	10.2125	9.73212	7.50017	3.60629	3.47374	4.1153
2179	sp|P17096-3|HMGA1_HUMAN	HMGA1	HMGA1_HUMAN Isoform HMG-R of High mobility group protein HMG-I/HMG-Y	36	RKQPPVSPGTALV	15.0073	R	R.KQPPVS#PGTALVGSQK.E	1	1	16.6861	9.46113	10.9101	9.62566	10.4892	8.2802	11.9519	7.95093	6.62089	3.65714	4.3667
1395	sp|Q8IYB3|SRRM1_HUMAN	SRRM1	SRRM1_HUMAN Serine/arginine repetitive matrix protein 1	260	PEPKEPSPEKNSK	1000	R	K.VPKPEPIPEPKEPS#PEK.N	2	1	12.6238	8.019	10.2826	6.82826	15.7851	9.75052	10.4903	9.68818	6.39494	5.77506	4.36223
1629	sp|P07947|YES_HUMAN	YES1	YES_HUMAN Tyrosine-protein kinase Yes	426	LIEDNEYTARQGA	24.437	R	R.LIEDNEY#TAR.Q	2	2	21.8735	9.35952	9.20085	6.59627	16.7965	5.06848	4.21545	3.51353	5.4955	8.33031	9.55014
2359	sp|P35658-5|NU214_HUMAN	NUP214	NU214_HUMAN Isoform 5 of Nuclear pore complex protein Nup214	667	PAAKPGSPQAKSL	33.1903	R	R.ITPPAAKPGS#PQAK.S	1	1	12.7567	7.96167	9.91382	8.98121	14.7437	9.53731	10.6113	9.97508	5.78818	4.60151	5.12958
2257	sp|O00429-6|DNM1L_HUMAN	DNM1L	DNM1L_HUMAN Isoform 6 of Dynamin-1-like protein	629	IPIMPASPQKGHA	82.645	R	K.SKPIPIMPAS#PQK.G	3	3	17.362	9.08634	10.417	9.10448	13.8617	8.81371	8.46713	6.48417	5.61135	4.89511	5.89697
1502	sp|O15264|MK13_HUMAN	MAPK13	MK13_HUMAN Mitogen-activated protein kinase 13	182	DAEMTGYVVTRWY	35.7774	R	R.HADAEM*TGY#VVTR.W	5	5	9.93349	14.6836	7.72633	6.68284	23.7784	6.59741	5.91677	4.66013	7.32611	7.20891	5.48606
779	sp|Q8N3R9|MPP5_HUMAN	MPP5	MPP5_HUMAN MAGUK p55 subfamily member 5	243	ITDERVYESIGQY	48.8739	R	R.VY#ESIGQYGGETVK.I	1	1	22.6852	8.74463	9.31884	7.22859	16.1782	9.72077	6.21286	3.62107	4.43676	4.79668	7.05639
2374	sp|Q00536-2|CDK16_HUMAN	CDK16	CDK16_HUMAN Isoform 2 of Cyclin-dependent kinase 16	249	DKLGEGTYATVYK	24.437	R	K.LGEGT#YAT#VYK.G	2	2	15.549	9.03282	10.4506	9.20378	16.1267	10.1519	9.33353	7.64657	4.79921	3.49925	4.20663
1074	sp|Q8ND56-2|LS14A_HUMAN	LSM14A	LS14A_HUMAN Isoform 2 of Protein LSM14 homolog A	220	RRSPVSTRPLPSA	19.8465	R	R.SPVST#RPLPSASQK.A	1	1	15.3681	8.4159	9.6712	8.64224	14.6541	9.05785	10.5724	8.15494	5.87877	4.2221	5.36237
976	sp|P27986-4|P85A_HUMAN	PIK3R1	P85A_HUMAN Isoform 4 of Phosphatidylinositol 3-kinase regulatory subunit alpha	467	REYDRLYEEYTRT	59.2977	R	R.EYDRLY#EEYTR.T	3	3	10.6609	7.035	7.24142	8.99101	10.9531	10.698	11.6895	12.2129	7.05676	5.8818	7.57958
2684	sp|P16070|CD44_HUMAN	CD44	CD44_HUMAN CD44 antigen	697	VEDRKPSGLNGEA	55.37	R	R.KPS#GLNGEASK.S	1	1	9.00381	8.63401	10.45	9.60671	9.91517	8.63356	10.3766	9.06825	9.81682	7.42183	7.07333
597	sp|Q15464|SHB_HUMAN	SHB	SHB_HUMAN SH2 domain-containing adapter protein B	268	KGESAGYMEPYEA	73.3109	R	K.GESAGY#M*EPYEAQR.I	5	5	6.49696	7.88732	8.86941	7.33009	5.67685	9.22343	8.09531	6.77056	13.8463	13.8004	12.0034
696	sp|P07900-2|HS90A_HUMAN	HSP90AA1	HS90A_HUMAN Isoform 2 of Heat shock protein HSP 90-alpha	353	ERDKEVSDDEAEE	1000	R	K.EVS#DDEAEEK.E	1	1	15.584	8.05696	10.3504	8.26474	17.5279	8.42565	9.31598	7.06382	6.52817	4.48963	4.39271
483	sp|Q06124|PTN11_HUMAN	PTPN11	PTN11_HUMAN Tyrosine-protein phosphatase non-receptor type 11	62	IQNTGDYYDLYGG	24.437	R	K.IQNTGDY#YDLYGGEK.F	1	1	15.8854	9.19166	11.3252	11.1792	14.2352	9.15589	9.45308	7.76045	4.14124	3.29202	4.38071
1458	sp|Q9UQ35|SRRM2_HUMAN	SRRM2	SRRM2_HUMAN Serine/arginine repetitive matrix protein 2	2581	ALKRVPSPTPAPK	20.1669	R	K.RVPS#PTPAPK.E	1	1	13.7373	8.45351	9.30105	7.7152	14.1061	10.0736	12.2086	9.08171	5.58751	4.60246	5.13294
2427	sp|P11413-2|G6PD_HUMAN	G6PD	G6PD_HUMAN Isoform Long of Glucose-6-phosphate 1-dehydrogenase	447	QPNEAVYTKMMTK	24.437	R	R.VQPNEAVY#TK.M	2	2	14.8184	9.02332	9.7559	8.11302	15.5555	10.3108	9.80776	8.18852	5.14945	4.52118	4.75608
2514	sp|Q8N3F8|MILK1_HUMAN	MICALL1	MILK1_HUMAN MICAL-like protein 1	640	PFNRKPSPAASPA	36.5564	R	R.KPS#PAASPATK.K	1	1	28.5126	5.92736	5.38933	4.38882	30.8223	6.18968	5.35192	4.34425	3.27228	2.99028	2.81114
2161	sp|Q8IZP0|ABI1_HUMAN	ABI1	ABI1_HUMAN Abl interactor 1	183	PTQKPPSPPMSGR	19.8465	R	R.TNPPTQKPPS#PPM*SGR.G	1	1	15.3215	9.05802	9.65891	8.54051	14.9798	9.80189	9.54099	7.45738	6.03879	4.48263	5.11958
1096	sp|P54756|EPHA5_HUMAN	EPHA5	EPHA5_HUMAN Ephrin type-A receptor 5	833	DDPEAAYTTRGGK	30.8348	R	R.VLEDDPEAAY#TTR.G	2	2	14.7586	9.58102	8.43342	5.55171	15.7515	5.79764	4.868	4.69239	8.51423	10.412	11.6395
2016	sp|Q92615|LAR4B_HUMAN	LARP4B	LAR4B_HUMAN La-related protein 4B	718	PAGGRPSPSAMGK	20.1669	R	R.RPAGGRPS#PSAM*GK.R	1	1	18.0279	10.8103	9.9165	8.19395	15.1287	10.0936	8.96634	6.02253	5.24163	3.89184	3.70678
312	sp|Q09666|AHNK_HUMAN	AHNAK	AHNK_HUMAN Neuroblast differentiation-associated protein AHNAK	836	PNVKGEYDVTMPK	73.3109	U	K.GEY#DVTMPK.V	6	6	1.90798	13.7853	9.5425	8.7615	2.233	9.13415	6.29937	5.53766	13.7555	17.7266	11.3165
358	sp|P00533|EGFR_HUMAN	EGFR	EGFR_HUMAN Epidermal growth factor receptor	1092	FLPVPEYINQSVP	66.9932	R	R.YSSDPTGALTEDSIDDTFLPVPEY#INQSVPK.R	19	14	3.74278	16.0894	14.8109	7.68854	3.42305	10.3723	5.25542	5.44392	11.733	12.9269	8.51392
690	sp|P05023|AT1A1_HUMAN	ATP1A1	AT1A1_HUMAN Sodium/potassium-transporting ATPase subunit alpha-1	10	GVGRDKYEPAAVS	124.374	R	R.DKY#EPAAVSEQGDK.K	3	3	8.13994	9.74938	8.58882	10.5888	7.57768	10.2366	7.47002	8.74066	8.4249	9.0805	11.4027
2580	sp|Q7Z5L9|I2BP2_HUMAN	IRF2BP2	I2BP2_HUMAN Interferon regulatory factor 2-binding protein 2	360	ARKRKPSPEPEGE	1000	R	K.RKPS#PEPEGEVGPPK.I	1	1	14.4613	7.83378	8.86309	7.89235	13.3426	8.74873	11.0958	9.75711	6.96263	5.53174	5.51088
1161	sp|Q99959|PKP2_HUMAN	PKP2	PKP2_HUMAN Plakophilin-2	631	KYSQNIYIQNRNI	99.2279	R	K.YSQNIY#IQNR.N	2	2	10.9691	8.00036	8.18704	7.37083	10.582	8.24369	8.65808	7.58864	11.0864	9.21231	10.1015
1914	sp|Q00526|CDK3_HUMAN	CDK3	CDK3_HUMAN Cyclin-dependent kinase 3	15	KIGEGTYGVVYKA	115.01	R	K.IGEGT#Y#GVVYK.A	17	1	17.9242	10.6029	10.0918	7.85055	13.2165	6.90881	10.5875	10.4202	3.87516	4.06098	4.46136
1380	sp|Q13113|PDZ1I_HUMAN	PDZK1IP1	PDZ1I_HUMAN PDZK1-interacting protein 1	99	SEHENAYENVPEE	28.2181	U	R.SSEHENAY#ENVPEEEGK.V	1	1	19.1984	8.42122	10.6811	5.67896	14.5723	12.4953	5.70002	6.61404	3.5338	5.68225	7.42262
1398	sp|Q8IYB3|SRRM1_HUMAN	SRRM1	SRRM1_HUMAN Serine/arginine repetitive matrix protein 1	616	PKRRTASPPPPPK	17.0091	R	R.TAS#PPPPPK.R	1	1	13.2188	8.32777	9.13938	8.01005	13.8388	9.49534	11.1624	8.09398	6.85997	5.98021	5.87325
2284	sp|Q9Y3L5|RAP2C_HUMAN	RAP2C	RAP2C_HUMAN Ras-related protein Rap-2c	166	IVRQMNYSSLPEK	17.0091	U	R.QM*NY#SSLPEK.Q	1	1	12.2809	8.60461	8.64192	8.35189	13.2922	9.32368	10.6877	8.33964	8.11482	6.16018	6.20244
511	sp|Q9H5V8|CDCP1_HUMAN	CDCP1	CDCP1_HUMAN CUB domain-containing protein 1	806	ESESEPYTFSHPN	17.0091	R	R.SPPESESEPY#TFSHPNNGDVSSK.D	1	1	19.2716	8.46208	6.99375	1.67321	22.0114	6.60789	4.26215	3.82153	6.10977	11.4319	9.35469
1666	sp|O95490-6|LPHN2_HUMAN	LPHN2	LPHN2_HUMAN Isoform 6 of Latrophilin-2	1421	SENEDIYYKSMPN	30.8348	R	R.SENEDIY#YK.S	3	3	7.33495	10.3764	10.1426	7.79549	8.68026	9.6542	8.02356	6.94223	10.0317	11.4692	9.54945
552	sp|P42685|FRK_HUMAN	FRK	FRK_HUMAN Tyrosine-protein kinase FRK	132	AEKQLLYSENKTG	48.8739	U	K.QLLY#SENK.T	2	2	13.3437	9.4583	9.99311	6.94756	15.0199	11.721	10.9189	9.26383	5.72802	4.25156	3.35418
884	sp|P29597|TYK2_HUMAN	TYK2	TYK2_HUMAN Non-receptor tyrosine-protein kinase TYK2	292	AEGEPCYIRDSGV	1000	R	R.LLAQAEGEPCY#IR.D	2	2	15.3141	12.6253	11.5165	6.76171	15.852	6.51878	4.82445	4.22006	7.97985	8.92029	5.46695
697	sp|P07900-2|HS90A_HUMAN	HSP90AA1	HS90A_HUMAN Isoform 2 of Heat shock protein HSP 90-alpha	385	EIEDVGSDEEEEK	93.5557	R	K.ESEDKPEIEDVGS#DEEEEK.K	2	2	16.0519	9.07364	9.28392	8.80681	16.4097	9.29005	9.66692	6.93307	5.39784	4.143	4.94312
899	sp|Q01082|SPTB2_HUMAN	SPTBN1	SPTB2_HUMAN Spectrin beta chain, non-erythrocytic 1	2102	RKRRPPSPEPSTK	47.0452	R	R.RPPS#PEPSTK.V	1	1	15.4203	6.96504	7.13892	6.79408	12.1585	11.0382	11.4161	8.97689	5.00882	3.99937	11.0837
2647	sp|Q8TEW0|PARD3_HUMAN	PARD3	PARD3_HUMAN Partitioning defective 3 homolog	489	GGSAPIYVKNILP	58.5514	R	R.DVTIGGSAPIY#VK.N	1	1	7.06426	12.2601	14.0468	10.4572	6.09909	9.81834	7.0591	7.54561	7.89865	8.76113	8.98964
2780	sp|Q07352|TISB_HUMAN	ZFP36L1	TISB_HUMAN Zinc finger protein 36, C3H1 type-like 1	54	GFPRRHSVTLPSS	20.1669	R	R.RHS#VTLPSSK.F	1	1	15.3431	7.40809	8.64415	8.76284	14.7755	10.2987	8.4353	7.68774	6.39179	5.46713	6.78567
1954	sp|P04075-2|ALDOA_HUMAN	ALDOA	ALDOA_HUMAN Isoform 2 of Fructose-bisphosphate aldolase A	258	DLKRCQYVTEKVL	59.2977	R	K.RCQY#VTEK.V	1	1	15.167	8.92566	10.9478	10.228	18.7281	8.61981	9.24093	6.98629	4.53059	4.23541	2.39048
354	sp|P00533|EGFR_HUMAN	EGFR	EGFR_HUMAN Epidermal growth factor receptor	1172	SLDNPDYQQDFFP	143.285	R	K.GSHQIS#LDNPDY#QQDFFPK.E	14	7	4.89646	12.1262	12.972	10.3114	4.70259	10.9065	7.16349	6.65274	8.98769	10.8886	10.3924
996	sp|P14618-2|KPYM_HUMAN	PKM	KPYM_HUMAN Isoform M1 of Pyruvate kinase PKM	175	EVGSKIYVDDGLI	127.526	R	K.IY#VDDGLISLQVK.Q	3	3	13.9754	9.79606	9.61205	8.8701	15.4418	10.2948	9.69064	9.91232	4.31928	3.07956	5.00803
1473	sp|Q9Y446|PKP3_HUMAN	PKP3	PKP3_HUMAN Plakophilin-3	390	AMRNLIYDNADNK	1000	U	R.NLIY#DNADNK.L	2	2	13.9904	9.17064	8.41513	7.20819	14.3457	9.57466	9.93631	9.35809	6.70208	5.8451	5.45368
945	sp|P07355-2|ANXA2_HUMAN	ANXA2	ANXA2_HUMAN Isoform 2 of Annexin A2	256	YKSYSPYDMLESI	30.8348	R	K.SYSPY#DM*LESIR.K	9	8	5.60383	5.22856	5.99958	10.7147	7.0619	8.45675	11.1007	22.3221	7.09156	6.49889	9.92142
415	sp|Q05655|KPCD_HUMAN	PRKCD	KPCD_HUMAN Protein kinase C delta type	374	LKGRGEYFAIKAL	1000	R	K.GRGEY#FAIK.A	1	1	14.4561	9.0055	10.2864	9.48536	15.1897	9.55061	10.6859	8.16591	5.20322	4.00701	3.9643
780	sp|Q8N3R9|MPP5_HUMAN	MPP5	MPP5_HUMAN MAGUK p55 subfamily member 5	245	DERVYESIGQYGG	31.2747	R	R.VYES#IGQYGGETVK.I	1	1	21.3319	8.19013	9.46404	7.36604	16.5174	10.3702	5.78388	3.77086	5.42514	4.98692	6.79342
1628	sp|P07947|YES_HUMAN	YES1	YES_HUMAN Tyrosine-protein kinase Yes	223	LDNGGYYITTRAQ	48.8739	R	K.LDNGGYY#ITTR.A	1	1	11.864	8.91639	9.42919	7.48799	14.403	11.414	11.4524	8.97877	6.55304	4.93312	4.56803
2271	sp|Q05682-4|CALD1_HUMAN	CALD1	CALD1_HUMAN Isoform 4 of Caldesmon	202	EKPKRGSIGENQI	1000	R	K.RGS#IGENQIK.D	1	1	12.059	7.0548	7.99786	9.33526	13.1549	9.43751	9.81053	10.7247	7.36717	6.15725	6.90102
874	sp|Q92796|DLG3_HUMAN	DLG3	DLG3_HUMAN Disks large homolog 3	673	EVDGQDYHFVVSR	105.418	R	R.DNEVDGQDY#HFVVSR.E	7	7	4.38721	3.77154	5.98349	11.2092	4.92099	10.3141	15.9166	16.6862	9.11719	8.04028	9.65318
2192	sp|Q13627|DYR1A_HUMAN	DYRK1A	DYR1A_HUMAN Dual specificity tyrosine-phosphorylation-regulated kinase 1A	321	GQRIYQYIQSRFY	73.3109	R	R.IYQY#IQSR.F	2	2	13.7256	8.97256	9.08607	8.1011	15.2064	9.64332	10.2667	9.34751	5.49769	4.85392	5.29915
850	sp|P18206|VINC_HUMAN	VCL	VINC_HUMAN Vinculin	692	PGNQAAYEHFETM	84.3587	R	R.NPGNQAAY#EHFETMK.N	2	2	13.6249	8.88725	7.84775	9.1668	15.1057	9.1881	10.1042	8.28641	6.30181	5.42623	6.06085
664	sp|P23528|COF1_HUMAN	CFL1	COF1_HUMAN Cofilin-1	140	ELQANCYEEVKDR	1000	R	K.HELQANCY#EEVK.D	3	3	5.58262	5.4355	6.49756	12.815	5.62673	7.58843	11.2244	23.0403	6.26282	5.09929	10.8274
1778	sp|Q8NHW5|RLA0L_HUMAN	RPLP0P6	RLA0L_HUMAN 60S acidic ribosomal protein P0-like	24	IQLLDDYPKCFIV	1000	R	K.IIQLLDDY#PK.C	3	2	16.119	9.58161	9.01354	8.34782	13.8112	10.1184	9.95969	8.22195	5.11245	4.49641	5.21794
2614	sp|P08758|ANXA5_HUMAN	ANXA5	ANXA5_HUMAN Annexin A5	94	SRLYDAYELKHAL	53.5337	R	R.LYDAY#ELK.H	1	1	16.3934	9.14343	9.68277	8.69704	14.9653	9.54823	9.72617	7.68771	5.88438	4.04575	4.22587
639	sp|Q13523|PRP4B_HUMAN	PRPF4B	PRP4B_HUMAN Serine/threonine-protein kinase PRP4 homolog	849	DNDITPYLVSRFY	34.0728	R	K.LCDFGSASHVADNDITPY#LVSR.F	4	3	12.1917	8.20874	7.83861	6.71806	12.6989	11.0413	11.6833	11.1174	6.09074	5.82763	6.58371
1464	sp|P29317|EPHA2_HUMAN	EPHA2	EPHA2_HUMAN Ephrin type-A receptor 2	772	DDPEATYTTSGGK	17.0091	U	R.VLEDDPEATY#TTSGGK.I	1	1	11.3171	9.9735	8.90561	7.85029	10.6307	6.46149	6.51855	5.35963	9.3496	10.4218	13.2117
997	sp|P14618-2|KPYM_HUMAN	PKM	KPYM_HUMAN Isoform M1 of Pyruvate kinase PKM	105	ASDPILYRPVAVA	15.5899	R	R.TATESFASDPILY#RPVAVALDTK.G	2	2	15.8764	9.34241	8.58297	8.87216	17.9743	9.78692	9.38751	7.01181	4.57913	3.9073	4.67911
2765	sp|Q9BWU0|NADAP_HUMAN	SLC4A1AP	NADAP_HUMAN Kanadaptin	82	KPALPVSPAARSK	1000	U	K.KPALPVS#PAAR.S	1	1	14.533	8.77538	10.1177	9.60051	14.4726	10.1404	10.1683	6.84198	5.99471	4.6048	4.75053
1911	sp|Q96NY8|PVRL4_HUMAN	PVRL4	PVRL4_HUMAN Poliovirus receptor-related protein 4	502	PTGNGIYINGRGH	39.6629	R	R.AKPTGNGIY#INGR.G	1	1	12.9734	10.321	11.1406	9.6868	10.9554	9.0202	6.78935	5.27639	8.49121	7.83802	7.50767
1758	sp|Q12959-2|DLG1_HUMAN	DLG1	DLG1_HUMAN Isoform 2 of Disks large homolog 1	782	EVDGRDYHFVTSR	97.7479	R	R.DY#HFVTSR.E	3	3	9.85661	6.1736	7.61901	7.66908	10.3236	9.42755	11.8803	17.1071	7.09253	6.06709	6.78344
1627	sp|P07947|YES_HUMAN	YES1	YES_HUMAN Tyrosine-protein kinase Yes	222	KLDNGGYYITTRA	48.8739	R	K.LDNGGY#YITTR.A	2	2	10.7015	8.70296	9.19174	7.48014	13.1236	11.0065	10.3475	8.19116	8.00275	7.19639	6.05578
0	sp|P46109|CRKL_HUMAN	CRKL	CRKL_HUMAN Crk-like protein	251	KRVPCAYDKTALA	1000	U	K.RVPCAY#DK.T	1	1	8.06257	8.05139	7.18519	6.92319	7.35312	8.5956	8.74299	6.2226	13.4414	12.4952	12.9268
872	sp|P43405|KSYK_HUMAN	SYK	KSYK_HUMAN Tyrosine-protein kinase SYK	323	TVSFNPYEPELAP	61.3249	R	R.QESTVSFNPY#EPELAPWAADK.G	1	1	13.7127	12.5175	16.3756	5.44245	10.1886	4.71645	5.98441	6.16563	8.54714	8.53047	7.81898
2817	sp|Q96G03|PGM2_HUMAN	PGM2	PGM2_HUMAN Phosphoglucomutase-2	165	GIMITASHNPKQD	20.1669	R	K.LCAGIMITAS#HNPK.Q	1	1	13.7867	9.8281	6.92534	6.55063	20.4893	12.6387	11.394	7.91653	3.90255	3.48276	3.08543
1463	sp|P29317|EPHA2_HUMAN	EPHA2	EPHA2_HUMAN Ephrin type-A receptor 2	575	QSPEDVYFSKSEQ	59.2977	U	R.QSPEDVY#FSK.S	2	2	11.5726	7.71447	7.83815	8.74596	9.73304	7.20449	8.69875	6.92225	10.1656	8.94017	12.4645
3	sp|O60716|CTND1_HUMAN	CTNND1	CTND1_HUMAN Catenin delta-1	280	RFHPEPYGLEDDQ	1000	R	R.FHPEPY#GLEDDQR.S	2	2	9.04224	10.6239	11.1594	7.68925	10.3289	8.78405	8.44273	7.83934	8.24849	10.3128	7.52888
1653	sp|Q9BXB4|OSB11_HUMAN	OSBPL11	OSB11_HUMAN Oxysterol-binding protein-related protein 11	189	ISQRRPSQNAISF	30.6121	U	R.RPS#QNAISFFNVGHSK.L	2	2	10.3005	6.81087	8.20805	8.17394	8.16891	8.77575	8.58145	8.39846	11.9097	10.3672	10.3052
925	sp|Q9UBC2-2|EP15R_HUMAN	EPS15L1	EP15R_HUMAN Isoform 2 of Epidermal growth factor receptor substrate 15-like 1	229	VPVLPASPPPKDS	110.838	R	K.TVFPGAVPVLPAS#PPPK.D	1	1	11.0676	8.56455	9.22327	10.2569	8.90031	7.06868	7.36479	6.65097	11.1086	8.58933	11.205
1613	sp|P45984-4|MK09_HUMAN	MAPK9	MK09_HUMAN Isoform Beta-2 of Mitogen-activated protein kinase 9	185	NFMMTPYVVTRYY	31.2747	R	R.TACTNFM*M*TPY#VVTR.Y	2	2	13.1478	6.8689	9.03091	8.87169	12.7414	7.49183	10.5407	10.3416	6.54152	5.75417	8.66943
1256	sp|Q13443|ADAM9_HUMAN	ADAM9	ADAM9_HUMAN Disintegrin and metalloproteinase domain-containing protein 9	769	PREVPIYANRFAV	1000	U	R.EVPIY#ANR.F	1	1	15.5682	8.32783	8.9685	9.10009	14.4104	8.90918	6.28849	5.58115	7.35915	6.8332	8.65378
851	sp|P18206|VINC_HUMAN	VCL	VINC_HUMAN Vinculin	822	SFLDSGYRILGAV	30.8348	R	K.SFLDSGY#R.I	1	1	16.1704	9.15504	9.83705	8.26738	15.8162	9.0793	10.3667	8.54203	4.80292	3.3975	4.56544
1445	sp|P15941-2|MUC1_HUMAN	MUC1	MUC1_HUMAN Isoform 2 of Mucin-1	1238	STDRSPYEKVSAG	20.1669	R	R.YVPPSSTDRSPY#EK.V	1	1	17.6128	9.84694	11.0632	8.67828	13.7462	9.55691	6.68635	5.82672	5.96415	5.47579	5.54276
2287	sp|P55196-5|AFAD_HUMAN	MLLT4	AFAD_HUMAN Isoform 5 of Afadin	1181	VANQPPSPGGKSA	91.0872	R	R.SSPNVANQPPS#PGGK.S	1	1	11.9694	8.7673	10.9976	10.0542	8.88569	10.8525	10.868	7.70902	6.90479	6.56291	6.42861
2308	sp|Q6Y7W6-3|PERQ2_HUMAN	GIGYF2	PERQ2_HUMAN Isoform 2 of PERQ amino acid-rich with GYF domain-containing protein 2	26	SGGSITSPPLSPA	30.8348	R	R.ALSSGGSITS#PPLSPALPK.Y	1	1	18.6147	8.84251	9.69657	9.93	12.4114	7.3834	10.0816	9.11259	4.5368	3.46441	5.92607
1872	sp|P08621|RU17_HUMAN	SNRNP70	RU17_HUMAN U1 small nuclear ribonucleoprotein 70 kDa	226	DERPGPSPLPHRD	22.5294	R	R.YDERPGPS#PLPHR.D	1	1	11.4773	8.19699	8.76074	8.49347	13.2692	11.5896	11.3352	7.93158	7.14724	5.65079	6.14794
1250	sp|Q9BXP5|SRRT_HUMAN	SRRT	SRRT_HUMAN Serrate RNA effector molecule homolog	544	WASEPGTPPLPTS	23.6238	R	R.TQLWASEPGT#PPLPTSLPSQNPILK.N	1	1	12.8509	6.98971	8.12229	8.60178	14.2131	9.99902	11.1364	8.98826	6.96331	5.40721	6.72807
2088	sp|Q13428-4|TCOF_HUMAN	TCOF1	TCOF_HUMAN Isoform 4 of Treacle protein	583	QAKPTSSPAKGPP	17.0091	R	K.SLGNILQAKPTSS#PAK.G	1	1	13.0566	9.13562	9.80121	7.18708	16.0429	10.0922	12.4266	10.0453	4.95672	3.84304	3.41274
2122	sp|Q86YV5|SG223_HUMAN	SGK223	SG223_HUMAN Tyrosine-protein kinase SgK223	411	TQPEPIYAESTKR	52.4027	U	R.EATQPEPIY#AESTK.R	2	2	12.7065	8.76292	8.35315	6.92609	11.6558	8.47785	6.80541	6.85452	9.62138	9.56414	10.2722
1396	sp|Q8IYB3|SRRM1_HUMAN	SRRM1	SRRM1_HUMAN Serine/arginine repetitive matrix protein 1	402	RRRHRPSPPATPP	1000	R	R.HRPS#PPAT#PPPK.T	2	1	13.1022	8.68128	8.17512	8.5302	15.6627	8.73049	9.91337	9.721	6.03297	5.42411	6.02658
1169	sp|P49840|GSK3A_HUMAN	GSK3A	GSK3A_HUMAN Glycogen synthase kinase-3 alpha	282	NVSYICSRYYRAP	59.2977	R	R.GEPNVSY#ICS#R.Y	1	1	13.4217	8.42698	8.98662	7.70372	20.2936	12.7116	10.9279	6.26353	3.93416	2.96028	4.36989
1693	sp|O94979-8|SC31A_HUMAN	SEC31A	SC31A_HUMAN Isoform 8 of Protein transport protein Sec31A	799	PVAGHESPKIPYE	23.5235	R	R.AQGEPVAGHES#PKIPYEK.Q	1	1	15.3328	8.80336	9.62306	8.0528	16.4357	8.17277	9.83106	8.95052	5.87451	3.96897	4.95444
1030	sp|Q00341|VIGLN_HUMAN	HDLBP	VIGLN_HUMAN Vigilin	437	LINRMDYVEINID	1000	R	R.M*DY#VEINIDHK.F	3	3	6.82743	6.46562	7.03808	10.0697	8.0811	8.9962	10.4985	19.8333	7.24806	6.30758	8.6344
1546	sp|Q13595|TRA2A_HUMAN	TRA2A	TRA2A_HUMAN Transformer-2 protein homolog alpha	202	ITKRAHTPTPGIY	13.3795	R	K.RAHT#PTPGIYM*GRPTHSGGGGGGGGGGGGGGGGR.R	3	2	10.8895	8.08391	8.15718	6.96554	13.8935	11.2988	12.4034	8.77724	6.53625	6.0992	6.89559
1474	sp|Q9Y446|PKP3_HUMAN	PKP3	PKP3_HUMAN Plakophilin-3	84	GTSRGQYHTLQAG	48.8739	R	R.GQY#HTLQAGFSSR.S	2	2	8.49192	7.82671	8.31993	7.54629	10.4941	10.5023	10.0777	8.90675	8.95509	9.75804	9.12121
1163	sp|Q99959|PKP2_HUMAN	PKP2	PKP2_HUMAN Plakophilin-2	626	AELPEKYSQNIYI	24.437	R	K.Y#SQNIYIQNR.N	1	1	13.1177	8.63855	8.75561	7.90975	11.7292	9.39168	9.55994	7.33715	8.46253	7.56985	7.52803
2252	sp|P37108|SRP14_HUMAN	SRP14	SRP14_HUMAN Signal recognition particle 14 kDa protein	27	RTSGSVYITLKKY	30.8348	R	R.TSGSVY#ITLK.K	1	1	12.6525	8.29874	9.58067	7.36363	15.0942	10.2257	10.3503	9.61736	7.00101	4.90509	4.91086
481	sp|Q06124|PTN11_HUMAN	PTPN11	PTN11_HUMAN Tyrosine-protein phosphatase non-receptor type 11	584	EDSARVYENVGLM	1000	R	R.VY#ENVGLM*QQQK.S	3	3	4.87578	15.7154	14.3604	9.79011	3.34062	5.28928	4.92423	3.23123	16.9297	12.2442	9.29901
1886	sp|P16949-2|STMN1_HUMAN	STMN1	STMN1_HUMAN Isoform 2 of Stathmin	38	VPEFPLSPPKKKD	46.1286	R	K.ESVPEFPLS#PPK.K	2	2	16.356	10.1854	8.97679	9.01853	13.2108	8.22868	7.61342	9.1524	5.08265	5.07035	7.10492
574	sp|Q9HBL0|TENS1_HUMAN	TNS1	TENS1_HUMAN Tensin-1	366	PLDGSLYAKVKKK	22.0108	R	R.DDGM*EEVVGHTQGPLDGSLY#AK.V	3	3	12.6448	5.88274	5.4582	5.20298	11.3968	9.02726	7.03872	5.85275	13.7548	11.7151	12.0259
685	sp|P19174-2|PLCG1_HUMAN	PLCG1	PLCG1_HUMAN Isoform 2 of 1-phosphatidylinositol 4,5-bisphosphate phosphodiesterase gamma-1	977	GTERACYRDMSSF	18.8054	R	R.ACY#RDM*SSFPETK.A	1	1	15.1143	8.50022	9.72002	11.1102	11.4087	8.0817	9.81099	11.8945	4.66436	4.58518	5.10987
1262	sp|P46013|KI67_HUMAN	MKI67	KI67_HUMAN Antigen KI-67	2223	TKIACRSPQPDPV	63.4188	R	K.IACRS#PQPDPVGTPTIFKPQSK.R	1	1	11.4916	7.70073	11.0363	12.9751	10.8248	9.7459	10.0485	8.99717	6.05672	5.49029	5.63294
2373	sp|Q00536-2|CDK16_HUMAN	CDK16	CDK16_HUMAN Isoform 2 of Cyclin-dependent kinase 16	254	GTYATVYKGKSKL	30.8348	R	K.LGEGTYATVY#K.G	1	1	16.7651	9.35924	8.59237	9.22891	14.0547	9.90123	10.3132	8.9427	5.23023	3.46075	4.15154
490	sp|Q96QZ7|MAGI1_HUMAN	MAGI1	MAGI1_HUMAN Membrane-associated guanylate kinase, WW and PDZ domain-containing protein 1	373	KIEDPVYGIYYVD	87.265	R	K.IEDPVY#GIYYVDHINR.K	2	2	16.023	9.15261	8.77714	7.16953	14.7534	9.92455	8.46877	8.29181	5.65957	4.99948	6.78021
1481	sp|Q8IZ21-2|PHAR4_HUMAN	PHACTR4	PHAR4_HUMAN Isoform 2 of Phosphatase and actin regulator 4	301	TLLSKPSPPLPPK	54.7552	R	R.NSNPVIAELSQAINSGTLLSKPS#PPLPPK.R	1	1	18.7973	8.35426	9.39517	7.89487	13.2142	9.91667	8.57354	5.75994	7.91742	5.55361	4.62304
975	sp|P27986-4|P85A_HUMAN	PIK3R1	P85A_HUMAN Isoform 4 of Phosphatidylinositol 3-kinase regulatory subunit alpha	452	GKKLHEYNTQFQE	59.2977	R	K.LHEY#NTQFQEK.S	1	1	10.1558	6.68322	6.93006	9.95435	10.9167	9.37348	11.1742	14.4509	6.23984	5.79245	8.32897
2583	sp|P35579|MYH9_HUMAN	MYH9	MYH9_HUMAN Myosin-9	1943	KGAGDGSDEEVDG	1000	R	K.GAGDGS#DEEVDGK.A	1	1	15.7672	8.62442	8.91861	8.70318	13.9293	7.46143	10.2571	8.32398	6.64902	5.09138	6.27438
1896	sp|P04083|ANXA1_HUMAN	ANXA1	ANXA1_HUMAN Annexin A1	21	ENEEQEYVQTVKS	112.015	R	K.QAWFIENEEQEY#VQTVK.S	16	10	4.08695	10.5828	5.81108	9.47315	4.77925	7.61482	7.24153	11.3636	14.4545	11.3743	13.218
784	sp|Q92692|PVRL2_HUMAN	PVRL2	PVRL2_HUMAN Poliovirus receptor-related protein 2	454	EQEMPRYHELPTL	142.629	U	R.Y#HELPTLEER.S	2	2	9.79715	10.2172	9.48832	8.83982	10.0496	9.19934	7.8817	6.51716	8.76437	10.483	8.76239
2444	sp|Q92630|DYRK2_HUMAN	DYRK2	DYRK2_HUMAN Dual specificity tyrosine-phosphorylation-regulated kinase 2	382	HQRVYTYIQSRFY	24.437	R	R.VYTY#IQSR.F	1	1	14.6281	9.89127	9.27579	8.15372	13.6294	9.16108	9.95803	7.82211	6.71573	5.04022	5.72457
8	sp|O60716|CTND1_HUMAN	CTNND1	CTND1_HUMAN Catenin delta-1	904	KSLDNNYSTPNER	48.8739	R	K.SLDNNY#STPNER.G	2	2	5.61883	13.4049	10.924	7.92013	5.73732	8.59562	5.90333	5.03314	11.3153	14.5345	11.0129
2633	sp|Q9UGI8|TES_HUMAN	TES	TES_HUMAN Testin	251	EGDPAIYAERAGY	1000	R	K.EGDPAIY#AER.A	1	1	17.4749	9.46358	9.73812	7.15045	15.1454	9.02944	9.8843	7.5551	5.2418	4.41376	4.90316
2589	sp|P08559-4|ODPA_HUMAN	PDHA1	ODPA_HUMAN Isoform 4 of Pyruvate dehydrogenase E1 component subunit alpha, somatic form, mitochondrial	331	YRYHGHSMSDPGV	20.1669	R	R.YHGHS#MSDPGVSYR.T	1	1	14.8961	9.65658	12.1251	8.5239	15.9186	12.6344	10.1703	7.46414	2.98016	3.73004	1.90058
1367	sp|O75063|XYLK_HUMAN	FAM20B	XYLK_HUMAN Glycosaminoglycan xylosylkinase	138	VVEGEPYAGYDRH	53.5337	U	R.DHVVEGEPY#AGYDR.H	2	2	13.1187	8.50813	9.45564	7.90856	12.947	11.663	12.2196	9.37226	5.64024	4.25449	4.91239
2800	sp|Q8IUC4|RHPN2_HUMAN	RHPN2	RHPN2_HUMAN Rhophilin-2	639	KISKKLSFLSWGT	26.1051	R	K.KLS#FLSWGTNK.N	1	1	8.30745	9.39807	12.3562	10.156	7.67428	11.5429	13.2417	7.42309	7.78287	6.30202	5.81534
1871	sp|P08621|RU17_HUMAN	SNRNP70	RU17_HUMAN U1 small nuclear ribonucleoprotein 70 kDa	126	RREFEVYGPIKRI	1000	R	R.EFEVY#GPIK.R	1	1	13.9943	8.71204	9.80882	8.56206	12.5338	10.2281	11.3736	9.45342	5.85867	4.59779	4.87734
2723	sp|P29692-2|EF1D_HUMAN	EEF1D	EF1D_HUMAN Isoform 2 of Elongation factor 1-delta	499	PQTQHVSPMRQVE	58.5514	R	R.ATAPQTQHVS#PMR.Q	1	1	16.0917	8.34351	8.00283	8.59304	14.988	9.72482	9.35427	8.75656	5.63774	5.04364	5.46387
683	sp|P19174-2|PLCG1_HUMAN	PLCG1	PLCG1_HUMAN Isoform 2 of 1-phosphatidylinositol 4,5-bisphosphate phosphodiesterase gamma-1	783	GRNPGFYVEANPM	193.276	R	R.NPGFY#VEANPMPTFK.C	3	2	4.76221	13.6018	12.5208	7.96868	3.97451	10.9054	8.91206	7.94386	8.72653	11.133	9.55107
550	sp|P42685|FRK_HUMAN	FRK	FRK_HUMAN Tyrosine-protein kinase FRK	46	SQRHGHYFVALFD	151.292	U	R.HGHY#FVALFDYQAR.T	2	1	12.1527	8.82949	6.38407	7.04628	15.3035	11.3653	13.8314	11.1823	4.71702	4.06295	5.1249
2629	sp|Q14444|CAPR1_HUMAN	CAPRIN1	CAPR1_HUMAN Caprin-1	78	KGKLDDYQERMNK	1000	R	K.LDDY#QER.M	2	2	4.56541	3.29024	4.12573	13.0993	5.04566	5.92257	10.3123	29.448	6.22731	4.87431	13.0892
1518	sp|Q70E73|RAPH1_HUMAN	RAPH1	RAPH1_HUMAN Ras-associated and pleckstrin homology domains-containing protein 1	856	PPPSPLSPVPSVV	23.6238	R	K.QQSFCAKPPPSPLS#PVPSVVK.Q	2	2	9.02631	9.50257	15.2498	13.5875	6.48373	11.1717	11.4918	7.15021	4.59716	5.08803	6.65123
1895	sp|P04083|ANXA1_HUMAN	ANXA1	ANXA1_HUMAN Annexin A1	207	SDARALYEAGERR	1000	U	R.ALY#EAGER.R	1	1	14.2605	9.46764	9.80825	6.94408	15.2651	9.64672	10.2765	9.63468	5.85947	3.8233	5.0138
1706	sp|Q9NWH9|SLTM_HUMAN	SLTM	SLTM_HUMAN SAFB-like transcription modulator	553	KRISSKSPGHMVI	114.968	R	K.S#PGHM*VILDQTK.G	3	3	13.4262	9.07618	9.45083	9.08335	12.74	9.98919	9.75029	7.72398	7.22387	6.15354	5.38258
1675	sp|P28482|MK01_HUMAN	MAPK1	MK01_HUMAN Mitogen-activated protein kinase 1	187	TGFLTEYVATRWY	20.1669	R	R.VADPDHDHTGFLTEY#VATR.W	2	2	6.98795	11.5906	9.20312	7.40179	2.30814	5.10052	3.85769	6.46668	16.8346	15.9001	14.3488
1456	sp|Q9UQ35|SRRM2_HUMAN	SRRM2	SRRM2_HUMAN Serine/arginine repetitive matrix protein 2	1003	PKVKAQTPPGPSL	49.5899	R	K.AQT#PPGPSLSGSK.S	1	1	13.029	8.42675	9.60596	8.34069	12.9066	11.1033	10.9431	8.52703	6.51126	5.42448	5.18172
1952	sp|Q15759|MK11_HUMAN	MAPK11	MK11_HUMAN Mitogen-activated protein kinase 11	182	DEEMTGYVATRWY	31.2747	R	R.QADEEM*TGY#VATR.W	2	2	11.6978	9.68417	7.21144	6.39279	16.7055	5.74361	4.87686	3.8791	12.9565	10.9609	9.89141
901	sp|Q9NRY4|RHG35_HUMAN	ARHGAP35	RHG35_HUMAN Rho GTPase-activating protein 35	1105	NEEENIYSVPHDS	17.0091	U	R.NEEENIY#SVPHDSTQGK.I	1	1	8.25208	5.63975	9.2455	8.39618	6.28649	10.2147	13.5021	17.1696	7.08727	4.64084	9.56543
565	sp|P60709|ACTB_HUMAN	ACTB	ACTB_HUMAN Actin, cytoplasmic 1	218	IKEKLCYVALDFE	58.1324	R	K.LCY#VALDFEQEM*ATAASSSSLEK.S	2	2	14.5631	8.92026	9.52031	8.38004	14.1977	9.54982	9.96047	8.01974	6.23976	4.99363	5.65521
2857	sp|O14493|CLD4_HUMAN	CLDN4	CLD4_HUMAN Claudin-4	208	SAAASNYVxxxxx	48.8739	U	R.SAAASNY#V.-	1	1	9.44926	8.05525	8.79047	8.65348	10.8681	7.12079	8.43315	7.4862	10.4529	10.196	10.4944
1092	sp|P40763-2|STAT3_HUMAN	STAT3	STAT3_HUMAN Isoform Del-701 of Signal transducer and activator of transcription 3	704	DPGAAPYLKTKFI	138.763	U	K.YCRPESQEHPEADPGAAPY#LK.T	3	3	2.30348	5.84127	6.19403	4.23471	1.71096	7.71184	7.90522	6.9176	20.2783	22.452	14.4506
2522	sp|Q9UHR4|BI2L1_HUMAN	BAIAP2L1	BI2L1_HUMAN Brain-specific angiogenesis inhibitor 1-associated protein 2-like protein 1	274	NVVRKDYDTLSKC	48.8739	U	K.DY#DTLSK.C	1	1	8.34774	9.48483	10.1705	8.13434	9.16134	9.67627	9.91555	7.48424	10.2036	9.33705	8.0846
1490	sp|Q96ST3|SIN3A_HUMAN	SIN3A	SIN3A_HUMAN Paired amphipathic helix protein Sin3a	277	PYASPRSPPVQPH	34.2061	U	R.S#PPVQPHTPVTISLGTAPSLQNNQPVEFNHAINYVNK.I	2	2	13.5695	8.20494	9.44279	7.94218	14.7653	10.7757	9.97871	9.56282	5.46709	4.48924	5.80173
310	sp|Q96JQ2|CLMN_HUMAN	CLMN	CLMN_HUMAN Calmin	635	HEPHQDSGEEAEG	95.3581	U	K.HEPHQDS#GEEAEGCPSAPEETPVDK.K	1	1	12.5651	8.05118	8.32137	7.54132	15.4414	10.483	11.6135	8.92162	6.12812	5.55209	5.38129
2571	sp|Q6WKZ4|RFIP1_HUMAN	RAB11FIP1	RFIP1_HUMAN Rab11 family-interacting protein 1	435	PESRRSSLLSLMT	17.0091	R	R.RSS#LLSLM*TGK.K	1	1	14.449	6.16957	7.41652	8.96727	10.918	10.3417	10.4243	8.90142	9.09595	6.68144	6.63479
1996	sp|Q06481|APLP2_HUMAN	APLP2	APLP2_HUMAN Amyloid-like protein 2	750	KMQNHGYENPTYK	58.5514	R	K.M*QNHGY#ENPTYK.Y	1	1	16.2714	10.4573	10.9072	9.67191	8.54328	8.10087	7.02796	9.64139	7.22046	5.28521	6.87305
1724	sp|P15529-2|MCP_HUMAN	CD46	MCP_HUMAN Isoform B of Membrane cofactor protein	387	GAEYATYQTKSTT	30.8348	R	K.ADGGAEYATY#QTK.S	1	1	8.10328	7.0441	7.2278	10.0793	9.86943	8.05845	5.97424	7.20427	11.1657	10.8668	14.4066
943	sp|P07355-2|ANXA2_HUMAN	ANXA2	ANXA2_HUMAN Isoform 2 of Annexin A2	206	DGSVIDYELIDQD	59.2977	R	R.AEDGSVIDY#ELIDQDAR.D	6	4	7.81678	8.11032	9.00182	9.5477	7.71904	8.62927	9.06054	10.2695	10.9189	8.87935	10.0469
2032	sp|P05067|A4_HUMAN	APP	A4_HUMAN Amyloid beta A4 protein	757	KMQQNGYENPTYK	94.9501	R	K.M*QQNGY#ENPTYK.F	1	1	15.1124	11.9423	11.1979	8.49384	9.16208	8.83901	8.60471	7.61908	6.93213	5.98076	6.11587
1450	sp|Q9NZH5|PTTG2_HUMAN	PTTG2	PTTG2_HUMAN Securin-2	165	FQLGPPSPVKMPS	1000	R	K.LFQLGPPS#PVK.M	1	1	20.0309	11.9454	12.8339	9.78652	12.7941	9.7376	7.36151	5.91655	3.88412	2.39037	3.31901
1469	sp|Q5VTE0|EF1A3_HUMAN	EEF1A1P5	EF1A3_HUMAN Putative elongation factor 1-alpha-like 3	29	TTGHLIYKCGGID	88.8188	R	K.STTTGHLIY#K.C	1	1	14.3237	8.48884	8.43618	6.97431	16.9139	10.6522	9.04739	9.1305	4.30529	5.11943	6.60828
2345	sp|Q9UN86-2|G3BP2_HUMAN	G3BP2	G3BP2_HUMAN Isoform B of Ras GTPase-activating protein-binding protein 2	225	EELEEKSTTPPPA	13.3795	U	K.S#TTPPPAEPVSLPQEPPKPR.V	1	1	14.0119	9.18774	8.48617	8.56973	15.2528	9.77525	11.9489	8.5757	5.57898	4.05101	4.56178
1899	sp|Q6NUM9|RETST_HUMAN	RETSAT	RETST_HUMAN All-trans-retinol 13,14-reductase	486	GKRGSDYETFKNS	44.2778	R	K.RGSDY#ETFK.N	2	2	3.24254	5.89123	7.16873	11.6878	4.20029	9.09986	11.7499	10.8547	12.1247	11.2891	12.6912
1884	sp|P16949-2|STMN1_HUMAN	STMN1	STMN1_HUMAN Isoform 2 of Stathmin	16	ELEKRASGQAFEL	124.922	R	K.RAS#GQAFELILSPR.S	1	1	13.1223	8.14004	8.90207	8.57441	13.1603	10.606	10.3987	10.0643	6.49511	4.70179	5.83492
1065	sp|O60547|GMDS_HUMAN	GMDS	GMDS_HUMAN GDP-mannose 4,6 dehydratase	327	LKYYRPTEVDFLQ	23.6238	R	K.YYRPT#EVDFLQGDCTK.A	1	1	13.9578	9.63652	10.7143	9.63327	12.8702	10.7903	9.19656	7.82287	5.34264	4.41125	5.6243
525	sp|Q13480-2|GAB1_HUMAN	GAB1	GAB1_HUMAN Isoform 2 of GRB2-associated-binding protein 1	689	ADERVDYVVVDQQ	1000	R	R.VDY#VVVDQQK.T	4	4	1.81265	17.7413	17.3653	13.1664	0.704501	4.25379	2.70666	2.36203	13.6493	14.8836	11.3544
314	sp|Q09666|AHNK_HUMAN	AHNAK	AHNK_HUMAN Neuroblast differentiation-associated protein AHNAK	715	TKVKGEYDVTVPK	57.7111	U	K.VKGEY#DVTVPK.L	5	5	1.11277	11.2043	7.52201	8.2636	1.50602	9.66959	7.15726	6.14276	15.9273	18.7027	12.7917
2249	sp|Q9H307|PININ_HUMAN	PNN	PININ_HUMAN Pinin	66	LLRRGFSDSGGGP	44.2778	R	R.RGFS#DSGGGPPAK.Q	1	1	6.72346	7.56349	10.3893	9.87107	6.85548	8.05866	10.7643	6.18662	12.7368	11.8104	9.04029
276	sp|P68363|TBA1B_HUMAN	TUBA1B	TBA1B_HUMAN Tubulin alpha-1B chain	272	HFPLATYAPVISA	30.8348	R	R.IHFPLATY#APVISAEK.A	1	1	13.4281	18.4101	16.0035	9.98687	13.1512	9.87236	6.17601	4.39314	2.17988	2.32112	4.07771
2012	sp|Q9H4G0|E41L1_HUMAN	EPB41L1	E41L1_HUMAN Band 4.1-like protein 1	343	KIRPGEYEQFEST	26.1051	R	K.IRPGEY#EQFESTIGFK.L	1	1	12.9623	6.68457	6.9071	7.28559	10.5588	7.84337	8.17289	7.21499	11.1905	9.71243	11.4675
1734	sp|P78369|CLD10_HUMAN	CLDN10	CLD10_HUMAN Claudin-10	207	MSSRTKYHGGEDF	1000	R	K.Y#HGGEDFK.T	2	2	5.56825	4.91443	4.85709	19.4634	5.87131	6.72381	6.6549	14.4375	7.98785	7.1418	16.3797
2509	sp|Q12888-2|TP53B_HUMAN	TP53BP1	TP53B_HUMAN Isoform 2 of Tumor suppressor p53-binding protein 1	1099	QPMKPISPVKDPV	56.9157	R	R.QSQQPM*KPIS#PVK.D	1	1	13.7746	7.41337	10.8212	9.50203	12.6661	9.83946	9.87208	7.93589	7.4417	4.97537	5.75827
1997	sp|Q06481|APLP2_HUMAN	APLP2	APLP2_HUMAN Amyloid-like protein 2	755	GYENPTYKYLEQM	17.0091	R	K.M*QNHGYENPTY#K.Y	1	1	16.3311	11.9679	11.2259	9.17788	11.4912	8.94468	9.20401	6.96182	5.27902	5.04728	4.36925
1261	sp|P46013|KI67_HUMAN	MKI67	KI67_HUMAN Antigen KI-67	357	YSQQQNSPQKHKN	84.3587	U	K.TPVQYSQQQNS#PQK.H	1	1	15.0444	9.16868	9.53376	8.73659	14.0266	8.9833	10.2215	9.88052	5.78196	4.53073	4.09199
2613	sp|O60784-2|TOM1_HUMAN	TOM1	TOM1_HUMAN Isoform 2 of Target of Myb protein 1	386	QRKEVKYEAPQAT	42.8692	R	K.Y#EAPQATDGLAGALDAR.Q	1	1	15.3047	8.02759	8.91925	8.43984	14.0051	9.06976	9.14263	8.52016	6.13708	5.49965	6.93422
394	sp|Q8N4X5-4|AF1L2_HUMAN	AFAP1L2	AF1L2_HUMAN Isoform 4 of Actin filament-associated protein 1-like 2	411	DNHLHFYQDRNRS	1000	R	R.DNHLHFY#QDR.N	1	1	15.206	9.27849	9.76302	9.1519	12.0862	9.07085	7.40166	5.99779	9.33086	6.47554	6.23769
1457	sp|Q9UQ35|SRRM2_HUMAN	SRRM2	SRRM2_HUMAN Serine/arginine repetitive matrix protein 2	1083	RQSHSESPSLQSK	20.1669	R	R.QSHSES#PSLQSK.S	1	1	13.2353	8.58825	8.46594	7.17181	13.7332	11.3078	11.3015	9.08153	6.05799	6.13336	4.92344
2428	sp|P11413-2|G6PD_HUMAN	G6PD	G6PD_HUMAN Isoform Long of Glucose-6-phosphate 1-dehydrogenase	549	KRVGFQYEGTYKW	24.2431	R	R.VGFQY#EGTYK.W	1	1	13.6468	9.48959	8.42397	7.30356	13.0885	8.34707	10.1708	10.0796	6.14933	5.62538	7.67537
2852	sp|P61313|RL15_HUMAN	RPL15	RL15_HUMAN 60S ribosomal protein L15	59	YKAKQGYVIYRIR	53.5337	R	K.QGY#VIYR.I	1	1	13.446	8.87866	9.61441	8.87821	13.0481	10.6755	10.7184	7.43431	6.83026	4.88093	5.59522
681	sp|O96013|PAK4_HUMAN	PAK4	PAK4_HUMAN Serine/threonine-protein kinase PAK 4	181	RDKRPLSGPDVGT	42.8692	U	K.RPLS#GPDVGTPQPAGLASGAK.L	1	1	12.3419	9.19373	9.48581	9.0653	11.7411	10.2333	10.3201	8.58134	7.1778	5.48312	6.37644
2212	sp|Q9UPZ9|ICK_HUMAN	ICK	ICK_HUMAN Serine/threonine-protein kinase ICK	159	KPPYTDYVSTRWY	17.0091	R	R.SKPPYTDY#VSTR.W	1	1	14.1492	10.7927	8.34805	7.91929	10.8144	5.69614	10.1936	14.0922	5.14788	5.59826	7.24836
2153	sp|Q05519|SRS11_HUMAN	SRSF11	SRS11_HUMAN Serine/arginine-rich splicing factor 11	207	VAAGLVSPSLKSD	20.1669	R	K.LNHVAAGLVS#PSLK.S	1	1	7.99108	5.6507	10.2243	15.1508	7.19956	7.14794	11.0512	9.14988	8.11564	7.62506	10.6938
2536	sp|Q08345-5|DDR1_HUMAN	DDR1	DDR1_HUMAN Isoform 4 of Epithelial discoidin domain-containing receptor 1	798	GMSRNLYAGDYYR	44.2778	R	R.NLY#AGDYYR.V	2	2	9.5467	9.09813	9.77262	8.814	9.92685	10.3648	8.82175	6.78232	9.60165	8.20538	9.06585
2498	sp|Q92841|DDX17_HUMAN	DDX17	DDX17_HUMAN Probable ATP-dependent RNA helicase DDX17	279	LKSTCIYGGAPKG	73.3109	R	K.STCIY#GGAPK.G	1	1	11.5944	11.5177	9.04998	7.56735	13.0024	9.19803	11.0401	8.99408	6.64412	5.94445	5.44743
1752	sp|P37802|TAGL2_HUMAN	TAGLN2	TAGL2_HUMAN Transgelin-2	192	QAGMTGYGMPRQI	44.2778	R	R.GASQAGM*TGY#GM*PR.Q	3	2	13.1834	8.78129	9.48106	9.42323	12.3063	8.43083	10.2143	6.80833	7.83588	6.80391	6.73143
329	sp|Q8NFJ5|RAI3_HUMAN	GPRC5A	RAI3_HUMAN Retinoic acid-induced protein 3	347	HAWPSPYKDYEVK	31.2747	U	R.AHAWPSPY#K.D	2	1	11.2261	8.28437	10.1977	9.88379	11.1089	9.05311	9.0226	8.60908	7.41777	8.00474	7.19178
2601	sp|Q01518|CAP1_HUMAN	CAP1	CAP1_HUMAN Adenylyl cyclase-associated protein 1	419	TDGCHAYLSKNSL	20.1669	R	K.TDGCHAY#LSK.N	1	1	13.6131	9.92264	9.99657	8.29348	13.6545	9.78917	10.0901	8.38031	5.56747	4.66312	6.02953
1807	sp|P05141|ADT2_HUMAN	SLC25A5	ADT2_HUMAN ADP/ATP translocase 2	191	IIYRAAYFGIYDT	44.2778	U	R.AAY#FGIYDTAK.G	2	1	11.3437	8.57124	8.83336	8.19224	13.226	12.3229	10.6822	8.75991	6.53112	5.84757	5.68969
278	sp|P68363|TBA1B_HUMAN	TUBA1B	TBA1B_HUMAN Tubulin alpha-1B chain	357	FKVGINYQPPTVV	27.1205	R	K.VGINY#QPPTVVPGGDLAK.V	1	1	11.1465	15.1921	11.7019	11.43	11.026	11.1862	7.61959	6.59613	4.66523	4.18907	5.24726
695	sp|P07900-2|HS90A_HUMAN	HSP90AA1	HS90A_HUMAN Isoform 2 of Heat shock protein HSP 90-alpha	406	KKIKEKYIDQEEL	1000	R	K.Y#IDQEELNK.T	2	2	5.84278	8.39096	8.90085	10.3468	4.9256	8.63215	9.16966	9.16073	10.9343	9.85627	13.8399
1085	sp|Q99569|PKP4_HUMAN	PKP4	PKP4_HUMAN Plakophilin-4	478	LNTTATYAEPYRP	27.1205	R	R.NNYALNTTATY#AEPYRPIQYR.V	1	1	15.3233	7.83113	10.4148	8.31158	13.597	10.8109	9.4589	6.91933	6.10827	5.67551	5.54923
2840	sp|Q15052|ARHG6_HUMAN	ARHGEF6	ARHG6_HUMAN Rho guanine nucleotide exchange factor 6	188	CKGDIIYVTRVEE	30.8348	R	K.GDIIY#VTR.V	1	1	12.4109	7.38286	8.75437	8.39947	13.6515	10.0493	10.2141	9.91797	6.71125	5.14448	7.36381
2543	sp|P50552|VASP_HUMAN	VASP	VASP_HUMAN Vasodilator-stimulated phosphoprotein	39	FSRVQIYHNPTAN	75.7382	R	R.VQIY#HNPTANSFR.V	1	1	12.9345	8.22534	8.84644	9.05385	13.2296	9.43451	11.2017	10.4609	6.15254	4.33996	6.12066
604	sp|Q9UHD8|SEPT9_HUMAN	42987	SEPT9_HUMAN Septin-9	278	APVDFGYVGIDSI	142.629	R	K.APVDFGY#VGIDSILEQMR.R	4	2	13.678	5.93657	7.89096	8.89096	7.9913	7.97801	9.42141	16.8658	6.84684	5.08848	9.41166
1316	sp|Q86X29|LSR_HUMAN	LSR	LSR_HUMAN Lipolysis-stimulated lipoprotein receptor	551	RSRDPHYDDFRSR	84.3587	R	R.SRDPHY#DDFR.S	2	1	6.02681	8.67499	9.3927	7.85111	5.47767	8.37268	7.2106	7.69904	11.6364	16.7916	10.8664
1690	sp|P46783|RS10_HUMAN	RPS10	RS10_HUMAN 40S ribosomal protein S10	12	KNRIAIYELLFKE	1000	R	R.IAIY#ELLFK.E	2	2	11.8093	11.2264	11.3077	8.15598	11.7862	9.42827	8.78457	7.7253	6.83977	6.46862	6.46788
817	sp|Q8IX03-2|KIBRA_HUMAN	WWC1	KIBRA_HUMAN Isoform 2 of Protein KIBRA	128	ELAQQEYQQLHAV	1000	R	R.LELAQQEY#QQLHAVWEHK.L	3	2	14.4509	7.46449	8.06579	8.42267	14.865	7.94206	9.14179	7.62042	7.26475	6.39834	8.36384
2051	sp|P61158|ARP3_HUMAN	ACTR3	ARP3_HUMAN Actin-related protein 3	16	VDCGTGYTKLGYA	17.0091	R	R.LPACVVDCGTGY#TK.L	1	1	13.3661	8.50136	8.50459	9.38715	13.229	11.1058	11.1348	7.92115	7.06231	4.95368	4.834
665	sp|P23528|COF1_HUMAN	CFL1	COF1_HUMAN Cofilin-1	68	QTVDDPYATFVKM	44.2778	R	K.EILVGDVGQTVDDPY#ATFVK.M	1	1	17.2676	17.3529	19.0045	5.46698	10.4269	4.10797	3.76041	4.15818	4.25678	6.65373	7.54402
2327	sp|Q04837|SSBP_HUMAN	SSBP1	SSBP_HUMAN Single-stranded DNA-binding protein, mitochondrial	99	GLRDVAYQYVKKG	17.0091	R	R.DVAY#QYVK.K	1	1	11.172	7.36042	8.81086	7.70975	13.2274	10.7253	11.6314	8.90201	7.78055	6.43876	6.24151
1302	sp|P13929|ENOB_HUMAN	ENO3	ENOB_HUMAN Beta-enolase	44	GASTGIYEALELR	71.7529	R	R.AAVPSGASTGIY#EALELR.D	1	1	5.64827	10.9836	5.50252	9.55407	6.92226	7.93735	6.89284	7.42802	14.9721	11.4062	12.7528
1149	sp|P27361|MK03_HUMAN	MAPK3	MK03_HUMAN Mitogen-activated protein kinase 3	204	TGFLTEYVATRWY	31.2747	R	R.IADPEHDHTGFLTEY#VATR.W	2	1	6.62162	15.798	13.943	7.86597	1.25436	6.25207	4.83821	6.1109	12.8226	12.6225	11.8708
1626	sp|P07947|YES_HUMAN	YES1	YES_HUMAN Tyrosine-protein kinase Yes	446	APEAALYGRFTIK	127.526	R	K.WTAPEAALY#GR.F	1	1	14.0922	8.13264	9.34579	7.12356	14.0383	10.6002	10.2557	8.42546	6.7516	5.79676	5.4379
1069	sp|Q7KZF4|SND1_HUMAN	SND1	SND1_HUMAN Staphylococcal nuclease domain-containing protein 1	908	DADEFGYSRxxxx	24.437	U	R.ADDADEFGY#SR.-	1	1	4.34311	11.8689	10.7115	11.2368	4.34304	10.3097	6.82327	7.35147	8.27724	12.322	12.4129
2332	sp|P51610-4|HCFC1_HUMAN	HCFC1	HCFC1_HUMAN Isoform 4 of Host cell factor 1	666	TITLVKSPISVPG	16.062	R	K.S#PISVPGGSALISNLGK.V	1	1	11.9882	6.56524	7.72548	10.3523	10.7351	6.92039	7.22251	11.3593	7.49647	7.78006	11.855
1372	sp|P15880|RS2_HUMAN	RPS2	RS2_HUMAN 40S ribosomal protein S2	133	FVAIGDYNGHVGL	1000	R	K.AFVAIGDY#NGHVGLGVK.C	1	1	13.7665	7.55106	8.24185	8.04183	14.4611	10.8955	11.6137	8.61874	6.07874	4.96631	5.76467
643	sp|P21333|FLNA_HUMAN	FLNA	FLNA_HUMAN Filamin-A	2379	GALEECYVTEIDQ	31.2747	R	K.VHSPSGALEECY#VTEIDQDK.Y	2	2	12.9441	8.94488	7.47329	8.25794	15.4883	9.61484	10.3291	8.23589	5.68668	5.87499	7.15
1944	sp|P62158|CALM_HUMAN	CALM1	CALM_HUMAN Calmodulin	100	DKDGNGYISAAEL	76.7327	R	K.DGNGY#ISAAELR.H	2	2	11.4389	9.11125	8.9179	10.5119	9.27483	10.7542	11.594	9.13876	7.04192	5.43659	6.77979
4	sp|O60716|CTND1_HUMAN	CTNND1	CTND1_HUMAN Catenin delta-1	257	PSRQDVYGPQPQV	1000	R	R.QDVY#GPQPQVR.V	1	1	8.78772	8.68156	10.0745	7.6606	7.39297	6.72896	5.31708	4.36745	12.1777	16.2501	12.5614
2814	sp|P00558|PGK1_HUMAN	PGK1	PGK1_HUMAN Phosphoglycerate kinase 1	203	FAKALESPERPFL	1000	R	K.ALES#PERPFLAILGGAK.V	1	1	17.7227	11.0166	10.0328	8.61324	17.3519	9.7018	8.5441	6.04714	3.66065	3.08031	4.22878
2020	sp|Q7Z2W4|ZCCHV_HUMAN	ZC3HAV1	ZCCHV_HUMAN Zinc finger CCCH-type antiviral protein 1	77	RVCRRKYCQRPCD	1000	R	K.Y#CQRPCDNLHLCK.L	2	2	3.51347	5.21757	6.28501	15.1527	4.64745	8.33454	11.768	18.5936	7.4959	7.13498	11.8568
2266	sp|P54760|EPHB4_HUMAN	EPHB4	EPHB4_HUMAN Ephrin type-B receptor 4	581	SDKHGQYLIGHGT	97.6019	R	K.HGQY#LIGHGTK.V	1	1	12.3496	9.37396	8.73029	8.39634	12.988	10.2073	11.0837	6.31898	7.25566	6.40784	6.88834
2058	sp|Q05397-5|FAK1_HUMAN	PTK2	FAK1_HUMAN Isoform 5 of Focal adhesion kinase 1	938	RSNDKVYENVTGL	20.1669	R	K.VY#ENVTGLVK.A	2	2	11.1258	9.25204	11.5803	7.96728	12.8589	8.29323	10.3878	7.06543	7.67852	7.01094	6.77968
330	sp|Q8NFJ5|RAI3_HUMAN	GPRC5A	RAI3_HUMAN Retinoic acid-induced protein 3	317	ETGDTLYAPYSTH	14.0618	U	R.AYSQEEITQGFEETGDTLY#APYSTHFQLQNQPPQK.E	1	1	18.0757	8.99203	7.07558	6.53364	15.3874	11.6527	9.21842	9.50649	3.52353	5.32907	4.70544
904	sp|P40763|STAT3_HUMAN	STAT3	STAT3_HUMAN Signal transducer and activator of transcription 3	705	PGSAAPYLKTKFI	33.6572	R	K.YCRPESQEHPEADPGSAAPY#LK.T	2	2	1.79214	5.80527	5.98475	3.90395	2.30959	8.21556	7.96286	7.18931	19.8219	23.1424	13.8722
1858	sp|Q92569|P55G_HUMAN	PIK3R3	P55G_HUMAN Phosphatidylinositol 3-kinase regulatory subunit gamma	184	GKKLQEYHSQYQE	31.2747	R	K.LQEY#HSQYQEK.S	1	1	8.01018	5.11468	5.55438	10.8301	7.70405	9.45542	12.3785	16.1751	8.40647	6.95092	9.42013
946	sp|P07355-2|ANXA2_HUMAN	ANXA2	ANXA2_HUMAN Isoform 2 of Annexin A2	48	YGSVKAYTNFDAE	24.437	R	K.AY#TNFDAER.D	2	2	1.79536	5.4276	6.58633	12.2955	1.99426	9.13946	14.188	16.9133	10.019	8.28429	13.357
2570	sp|O60841|IF2P_HUMAN	EIF5B	IF2P_HUMAN Eukaryotic translation initiation factor 5B	214	PGPNIESGNEDDD	28.6965	U	K.NKPGPNIES#GNEDDDASFK.I	1	1	16.5525	8.46004	6.11849	8.75552	14.3077	10.1934	8.78551	7.71	7.28639	5.91371	5.91668
542	sp|P22626|ROA2_HUMAN	HNRNPA2B1	ROA2_HUMAN Heterogeneous nuclear ribonucleoproteins A2/B1	259	GGNFGGSPGYGGG	44.2778	R	R.GFGDGYNGYGGGPGGGNFGGS#PGYGGGR.G	1	1	12.8072	8.48546	9.0788	9.46439	12.6201	9.38928	10.9905	7.76412	7.20809	5.68363	6.50835
318	sp|Q09666|AHNK_HUMAN	AHNAK	AHNK_HUMAN Neuroblast differentiation-associated protein AHNAK	1469	PKMKGDYDVTVPK	23.6238	U	K.GDY#DVTVPK.V	3	3	1.24834	8.25436	5.77397	6.85926	1.78378	6.96992	6.38738	4.90741	20.1076	23.5663	14.1417
352	sp|P00533|EGFR_HUMAN	EGFR	EGFR_HUMAN Epidermal growth factor receptor	978	ARDPQRYLVIQGD	1000	R	R.Y#LVIQGDER.M	1	1	12.1018	8.66773	8.65786	11.0078	10.1863	9.58565	9.30739	9.904	6.77483	5.92951	7.87706
6	sp|O60716|CTND1_HUMAN	CTNND1	CTND1_HUMAN Catenin delta-1	208	LPRNFHYPPDGYS	71.9493	R	R.NFHY#PPDGYSR.H	1	1	8.8334	7.07629	7.97034	8.52556	9.28231	7.62827	5.97296	3.86196	19.5662	10.5172	10.7655
2794	sp|Q9UDY2-7|ZO2_HUMAN	TJP2	ZO2_HUMAN Isoform 7 of Tight junction protein ZO-2	1017	DQLRDNSPPPAFK	1000	R	R.DNS#PPPAFKPEPPK.A	1	1	15.6327	8.22164	6.9315	8.91579	10.2903	9.53857	10.4625	9.73847	7.13493	4.81151	8.32214
1685	sp|Q96SK2|TM209_HUMAN	TMEM209	TM209_HUMAN Transmembrane protein 209	98	PTSLVVSPGQQTL	30.6121	R	K.YTVAPTSLVVS#PGQQTLLGLK.T	2	2	14.0096	8.06972	9.60493	8.37688	14.2916	11.2122	12.0989	8.83568	4.65304	4.32439	4.52315
2178	sp|P17096-3|HMGA1_HUMAN	HMGA1	HMGA1_HUMAN Isoform HMG-R of High mobility group protein HMG-I/HMG-Y	44	GTALVGSQKEPSE	22.4917	R	R.KQPPVSPGTALVGS#QK.E	1	1	11.6383	7.74412	7.28962	6.67392	19.8622	10.1368	9.48655	8.8567	7.2148	5.68534	5.41164
737	sp|P29353-6|SHC1_HUMAN	SHC1	SHC1_HUMAN Isoform 6 of SHC-transforming protein 1	428	LFDDPSYVNVQNL	24.437	R	R.ELFDDPSY#VNVQNLDK.A	1	1	3.31062	12.1246	12.3133	8.7727	2.02015	12.2024	10.8866	9.30415	10.7123	9.84716	8.50607
1277	sp|Q96TA1|NIBL1_HUMAN	FAM129B	NIBL1_HUMAN Niban-like protein 1	665	QGLRPESPPPAGP	90.697	R	R.GLLAQGLRPES#PPPAGPLLNGAPAGESPQPK.A	2	1	17.0094	8.967	9.02929	9.60472	13.0907	8.40538	9.21962	9.2125	5.90768	3.60092	5.95282
1106	sp|P51149|RAB7A_HUMAN	RAB7A	RAB7A_HUMAN Ras-related protein Rab-7a	183	ETEVELYNEFPEP	71.9493	R	K.QETEVELY#NEFPEPIK.L	5	3	4.63923	7.17663	7.40237	7.045	4.32862	5.41258	5.91646	6.85568	16.5694	21.7334	12.9207
1811	sp|O00233|PSMD9_HUMAN	PSMD9	PSMD9_HUMAN 26S proteasome non-ATPase regulatory subunit 9	41	AQIKANYDVLESQ	65.4396	R	K.ANY#DVLESQK.G	2	2	7.91815	5.5843	7.38741	11.1137	8.74221	12.4448	13.1852	12.3534	7.55966	6.26837	7.44274
644	sp|P21333|FLNA_HUMAN	FLNA	FLNA_HUMAN Filamin-A	1308	GNLTETYVQDRGD	30.8348	R	R.VANPSGNLTETY#VQDR.G	2	2	9.28067	6.6104	6.95234	9.13798	9.38523	9.27041	11.8876	16.5717	7.15042	5.45885	8.29436
360	sp|P00533|EGFR_HUMAN	EGFR	EGFR_HUMAN Epidermal growth factor receptor	1166	KGSHQISLDNPDY	51.0043	R	K.GSHQIS#LDNPDY#QQDFFPK.E	6	2	10.1085	10.5541	10.5454	8.81636	8.29469	9.83696	9.8397	7.36942	8.41676	8.23681	7.98137
730	sp|O43707|ACTN4_HUMAN	ACTN4	ACTN4_HUMAN Alpha-actinin-4	212	RPELIEYDKLRKD	1000	R	R.HRPELIEY#DK.L	1	1	5.85603	4.94403	4.71039	9.6479	6.18554	8.33408	9.08449	11.2664	11.4522	10.8782	17.6407
1751	sp|P37802|TAGL2_HUMAN	TAGLN2	TAGL2_HUMAN Transgelin-2	8	ANRGPAYGLSREV	53.5337	U	R.GPAY#GLSR.E	1	1	4.04481	10.6382	10.5561	11.8213	5.5814	8.68726	8.25812	7.83596	9.51906	9.53132	13.5266
2106	sp|P30041|PRDX6_HUMAN	PRDX6	PRDX6_HUMAN Peroxiredoxin-6	89	SKDINAYNCEEPT	97.6019	U	K.DINAY#NCEEPTEK.L	1	1	10.222	6.55574	8.66521	10.8354	12.3253	8.59395	9.62396	9.51198	7.60227	6.96306	9.1011
5	sp|O60716|CTND1_HUMAN	CTNND1	CTND1_HUMAN Catenin delta-1	600	IPQAERYQEAAPN	143.703	R	R.Y#QEAAPNVANNTGPHAASCFGAK.K	3	3	3.61982	7.15622	6.22542	5.82301	3.38693	11.6155	12.3214	11.8648	11.8513	12.9786	13.157
1788	sp|Q8N4S9|MALD2_HUMAN	MARVELD2	MALD2_HUMAN MARVEL domain-containing protein 2	469	QDQFSEYKELSAE	31.2747	R	K.AVFQDQFSEY#K.E	2	2	6.55717	5.12305	5.74201	8.39102	6.85589	8.38417	12.4215	24.0095	7.1613	6.56749	8.78686
1321	sp|Q86X29|LSR_HUMAN	LSR	LSR_HUMAN Lipolysis-stimulated lipoprotein receptor	406	DSMRVLYYMEKEL	24.437	R	R.VLY#YM*EK.E	1	1	6.41145	11.4971	10.3785	9.27868	5.19461	10.6571	7.1901	7.2147	10.4538	11.915	9.80898
1850	sp|P00966|ASSY_HUMAN	ASS1	ASSY_HUMAN Argininosuccinate synthase	131	QVRFELSCYSLAP	15.0073	R	R.FELS#CYSLAPQIK.V	1	1	17.7129	8.59215	10.8667	8.12535	14.3009	9.0568	9.79138	6.32629	5.54909	4.55581	5.12264
2356	sp|Q9Y5K6|CD2AP_HUMAN	CD2AP	CD2AP_HUMAN CD2-associated protein	409	RSSGTVYPKRPEK	48.8739	U	R.SSGTVY#PK.R	1	1	3.66551	8.90859	11.5247	10.5893	3.51667	10.2006	11.8889	8.152	11.9753	10.54	9.03839
313	sp|Q09666|AHNK_HUMAN	AHNAK	AHNK_HUMAN Neuroblast differentiation-associated protein AHNAK	121	SGDDEEYQRIYTT	66.9932	R	R.EVFSSCSSEVVLSGDDEEY#QR.I	3	1	12.7749	10.4731	8.61997	8.84406	12.1625	9.86667	7.85632	7.65279	6.8787	9.15828	5.71275
346	sp|Q9BZI7|REN3B_HUMAN	UPF3B	REN3B_HUMAN Regulator of nonsense transcripts 3B	117	RDRFDGYVFLDNK	1000	R	R.DRFDGY#VFLDNK.G	4	4	1.79956	3.27482	5.75996	13.8194	2.50089	8.97641	15.442	21.1329	8.69463	7.77637	10.8231
2416	sp|Q8WX93|PALLD_HUMAN	PALLD	PALLD_HUMAN Palladin	641	TPAVLLSPTKEPP	31.2747	R	K.SLPTPAVLLS#PTK.E	1	1	15.245	6.20012	6.79114	11.2552	9.56692	7.17472	9.67204	13.3558	7.11199	5.18038	8.4467
1566	sp|O00459|P85B_HUMAN	PIK3R2	P85B_HUMAN Phosphatidylinositol 3-kinase regulatory subunit beta	460	QDKSREYDQLYEE	25.1744	R	K.SREY#DQLYEEYTR.T	2	2	7.53943	6.50899	8.00939	9.88677	8.16188	12.19	12.848	14.4382	7.33298	6.51661	6.56781
567	sp|P60709|ACTB_HUMAN	ACTB	ACTB_HUMAN Actin, cytoplasmic 1	53	MGQKDSYVGDEAQ	24.437	R	K.DSY#VGDEAQSK.R	1	1	2.86289	5.802	6.65577	10.7112	3.46253	6.32224	7.49291	13.1623	12.7554	10.9815	19.7913
2438	sp|P26045|PTN3_HUMAN	PTPN3	PTN3_HUMAN Tyrosine-protein phosphatase non-receptor type 3	496	TEDASQYYCDKND	48.8739	R	K.GGSTEDASQY#YCDK.N	1	1	10.4536	9.26429	9.59998	8.83376	13.4161	11.4217	9.70456	7.61183	8.04869	5.04606	6.59944
2116	sp|O60890|OPHN1_HUMAN	OPHN1	OPHN1_HUMAN Oligophrenin-1	370	DGKEPIYHSPITK	59.2977	R	K.EPIY#HSPITK.Q	2	2	3.89441	6.83435	7.05698	7.60848	3.26903	11.6509	11.2265	7.86112	14.091	11.8791	14.6282
2834	sp|O75909-4|CCNK_HUMAN	CCNK	CCNK_HUMAN Isoform 4 of Cyclin-K	324	QQPKKPSPQPSSP	18.8054	R	K.KPS#PQPSS#PR.Q	1	1	10.3918	9.14108	9.06127	8.96479	14.4063	10.3535	11.4594	7.98462	6.57889	6.24454	5.41384
1709	sp|Q86Z02|HIPK1_HUMAN	HIPK1	HIPK1_HUMAN Homeodomain-interacting protein kinase 1	352	KAVCSTYLQSRYY	48.8739	R	K.AVCSTY#LQSR.Y	1	1	16.2847	8.60342	9.27932	7.35287	15.9905	8.56001	9.64772	6.95437	7.51468	5.4299	4.38245
2824	sp|Q9NYF8|BCLF1_HUMAN	BCLAF1	BCLF1_HUMAN Bcl-2-associated transcription factor 1	290	YSPSQNSPIHHIP	15.0073	R	R.YSPSQNS#PIHHIPSR.R	1	1	11.7656	8.13629	7.58011	8.03671	14.8334	10.9351	10.3868	8.59431	6.37723	6.71146	6.64302
1296	sp|P07948|LYN_HUMAN	LYN	LYN_HUMAN Tyrosine-protein kinase Lyn	508	TATEGQYQQQPxx	33.6572	R	K.AEERPTFDYLQSVLDDFYTATEGQY#QQQP.-	1	1	10.5083	10.6283	10.4937	7.77378	8.65641	10.8116	8.28514	5.59395	10.132	8.06675	9.05007
2527	sp|Q5XXA6|ANO1_HUMAN	ANO1	ANO1_HUMAN Anoctamin-1	7	MRVNEKYSTLPAE	24.437	R	K.Y#STLPAEDR.S	1	1	5.69476	10.6834	7.27892	9.50416	5.95975	8.04403	7.27689	9.29148	10.2934	13.242	12.7313
2375	sp|Q00536-2|CDK16_HUMAN	CDK16	CDK16_HUMAN Isoform 2 of Cyclin-dependent kinase 16	252	GEGTYATVYKGKS	17.0091	R	K.LGEGTY#AT#VYK.G	1	1	15.5477	7.95226	7.27782	9.53009	15.6767	9.7038	10.4692	7.50296	5.62007	4.93707	5.78237
2214	sp|O75533|SF3B1_HUMAN	SF3B1	SF3B1_HUMAN Splicing factor 3B subunit 1	426	GYVPIRTPARKLT	30.6121	U	K.VLPPPAGYVPIRT#PAR.K	2	1	13.4885	6.42553	7.2178	7.67783	13.8104	11.3429	10.4794	8.58563	6.60945	6.96906	7.39351
1677	sp|Q15223|PVRL1_HUMAN	PVRL1	PVRL1_HUMAN Poliovirus receptor-related protein 1	468	EDAKRPYFTVDEA	31.2747	U	K.RPY#FTVDEAEAR.Q	1	1	12.5671	9.9401	8.92355	7.18247	16.1531	10.1332	10.0786	7.39376	6.78681	5.85392	4.98733
1317	sp|Q86X29|LSR_HUMAN	LSR	LSR_HUMAN Lipolysis-stimulated lipoprotein receptor	586	RSGDLPYDGRLLE	81.6917	R	R.SGDLPY#DGR.L	1	1	5.30832	8.2351	8.13926	10.958	4.62462	10.2768	7.99515	8.6968	9.60902	10.9256	15.2313
364	sp|P00533|EGFR_HUMAN	EGFR	EGFR_HUMAN Epidermal growth factor receptor	991	ERMHLPSPTDSNF	20.1669	R	R.M*HLPS#PTDS#NFYR.A	1	1	6.82174	7.40951	7.65899	10.8343	8.4447	8.05852	8.60913	8.80824	10.5081	10.7844	12.0624
1480	sp|Q8IZ21-2|PHAR4_HUMAN	PHACTR4	PHAR4_HUMAN Isoform 2 of Phosphatase and actin regulator 4	657	ILRFNEYVEVTDA	84.6094	R	R.FNEY#VEVTDAQDYDR.R	3	2	8.72903	5.26507	6.9523	10.753	9.17139	8.75309	10.5452	11.8251	8.36746	9.33666	10.3017
2757	sp|Q01105|SET_HUMAN	SET	SET_HUMAN Protein SET	146	YFDENPYFENKVL	26.1051	R	R.IDFYFDENPY#FENK.V	1	1	13.9045	7.43305	8.5772	8.09559	14.182	7.91943	8.82668	7.69203	8.53407	7.30749	7.52793
1565	sp|O00459|P85B_HUMAN	PIK3R2	P85B_HUMAN Phosphatidylinositol 3-kinase regulatory subunit beta	464	REYDQLYEEYTRT	53.5337	R	R.EYDQLY#EEYTR.T	1	1	9.75204	6.5045	7.33484	8.02853	6.33098	14.6728	12.9958	12.0788	5.99565	4.57673	11.7293
2754	sp|O75694|NU155_HUMAN	NUP155	NU155_HUMAN Nuclear pore complex protein Nup155	992	SKAAPQSPSVPKK	20.1669	R	K.AAPQS#PSVPK.K	1	1	10.563	7.91127	9.71602	8.78468	11.5362	10.6915	10.9292	9.32861	7.60385	6.14263	6.79308
2110	sp|P07108-5|ACBP_HUMAN	DBI	ACBP_HUMAN Isoform 5 of Acyl-CoA-binding protein	90	EEMLFIYGHYKQA	38.1888	R	K.TKPSDEEMLFIY#GHYK.Q	1	1	13.19	10.2315	8.99243	8.65894	15.1398	10.8117	7.83018	8.49677	5.27066	5.79573	5.58227
1549	sp|Q9UQB8|BAIP2_HUMAN	BAIAP2	BAIP2_HUMAN Brain-specific angiogenesis inhibitor 1-associated protein 2	164	SDKELQYIDAISN	126.676	R	K.ELQY#IDAISNK.Q	2	2	2.36204	4.25089	4.96082	9.76834	3.25382	9.50212	17.22	20.529	9.31886	8.48609	10.348
1475	sp|Q9Y446|PKP3_HUMAN	PKP3	PKP3_HUMAN Plakophilin-3	176	VGSRADYDTLSLR	30.8348	R	R.ADY#DTLSLR.S	1	1	7.92264	9.87778	7.92407	8.04925	9.63642	11.9792	10.6878	9.13066	9.53808	7.52418	7.72991
785	sp|Q92692|PVRL2_HUMAN	PVRL2	PVRL2_HUMAN Poliovirus receptor-related protein 2	513	DKINPIYDALSYS	36.5564	U	K.INPIY#DALSYSSPSDSYQGK.G	1	1	14.282	11.9017	11.5872	4.94479	13.4391	7.25957	3.71555	3.72219	7.54914	13.2006	8.39817
2587	sp|O00401|WASL_HUMAN	WASL	WASL_HUMAN Neural Wiskott-Aldrich syndrome protein	256	ETSKVIYDFIEKT	1000	U	K.VIY#DFIEK.T	1	1	17.1613	8.56367	11.9859	6.56441	12.4383	9.43799	8.58271	6.89443	5.90866	5.6839	6.77879
2229	sp|P0CG48|UBC_HUMAN	UBC	UBC_HUMAN Polyubiquitin-C	59	GRTLSDYNIQKES	48.8739	R	R.TLSDY#NIQK.E	2	2	4.85099	4.00457	6.93461	18.9295	4.66794	6.37375	11.0645	14.7394	8.56826	7.73943	12.1271
2207	sp|O75167-4|PHAR2_HUMAN	PHACTR2	PHAR2_HUMAN Isoform 4 of Phosphatase and actin regulator 2	590	ILRFNEYVEVTDS	31.2747	R	R.FNEY#VEVTDSPDYDR.R	2	1	6.16258	6.94166	7.94425	8.86346	6.48979	9.86802	12.755	9.43765	12.5658	9.34509	9.62675
2547	sp|Q9NZM3|ITSN2_HUMAN	ITSN2	ITSN2_HUMAN Intersectin-2	553	YQNKLIYLVPEKQ	1000	R	K.LIY#LVPEK.Q	1	1	2.76882	2.6797	4.86942	16.9102	3.27521	5.83871	12.2218	22.6481	7.26078	6.75839	14.7689
2044	sp|P04920|B3A2_HUMAN	SLC4A2	B3A2_HUMAN Anion exchange protein 2	73	GEEDFEYHRQSSH	86.8328	R	R.SYGEEDFEY#HR.Q	1	1	10.9644	8.42403	10.5144	10.5893	10.4073	9.24849	8.28966	7.88728	8.73368	7.19787	7.7436
1907	sp|P25685|DNJB1_HUMAN	DNAJB1	DNJB1_HUMAN DnaJ homolog subfamily B member 1	176	VSLEEIYSGCTKK	22.4917	R	R.VSLEEIY#SGCTK.K	1	1	6.70467	3.94794	6.61158	14.9411	6.16705	10.8145	14.6127	13.6564	7.53336	5.75503	9.25578
2346	sp|Q96J84-2|KIRR1_HUMAN	KIRREL	KIRR1_HUMAN Isoform 2 of Kin of IRRE-like protein 1	621	KDPTNGYYNVRAH	24.437	R	K.DPTNGY#YNVR.A	1	1	7.88596	11.3429	9.82745	9.25485	8.20663	9.47414	7.32906	6.55768	9.90837	10.4106	9.80238
409	sp|P16885|PLCG2_HUMAN	PLCG2	PLCG2_HUMAN 1-phosphatidylinositol 4,5-bisphosphate phosphodiesterase gamma-2	759	YDVSRMYVDPSEI	31.2747	U	R.M*Y#VDPSEINPSMPQR.T	3	3	3.55375	10.921	10.8658	8.80658	4.68911	13.0707	11.2885	8.33492	10.6463	8.21822	9.60519
2123	sp|Q02241-2|KIF23_HUMAN	KIF23	KIF23_HUMAN Isoform 2 of Kinesin-like protein KIF23	582	EKTTTIYEEDKRN	48.8739	R	K.TTTIY#EEDK.R	1	1	2.24295	3.23876	5.80867	9.8988	3.4957	11.1217	16.4838	19.0459	11.0722	8.23237	9.35921
2584	sp|P35579|MYH9_HUMAN	MYH9	MYH9_HUMAN Myosin-9	754	ELDSNLYRIGQSK	13.3795	R	K.ALELDSNLY#R.I	1	1	11.2177	8.62196	8.6283	9.37461	11.4248	9.12198	8.78803	9.42606	6.9339	7.29745	9.1653
814	sp|P09525|ANXA4_HUMAN	ANXA4	ANXA4_HUMAN Annexin A4	165	GRDEGNYLDDALV	1000	R	R.DEGNY#LDDALVR.Q	3	2	6.47372	7.81123	8.09457	9.7145	6.23751	11.7836	13.5253	9.89578	8.48323	8.38192	9.59857
2406	sp|O75955|FLOT1_HUMAN	FLOT1	FLOT1_HUMAN Flotillin-1	238	AQADLAYQLQVAK	1000	R	R.AQADLAY#QLQVAK.T	1	1	10.1031	11.4382	9.42882	9.09452	9.76401	8.49218	7.58121	8.61001	7.63748	9.96276	7.88778
2489	sp|O60674|JAK2_HUMAN	JAK2	JAK2_HUMAN Tyrosine-protein kinase JAK2	570	RREVGDYGQLHET	26.1051	R	R.EVGDY#GQLHETEVLLK.V	1	1	13.3654	9.18684	11.3637	10.2672	11.7156	10.3617	7.51601	5.32446	7.38286	7.25976	6.25642
2465	sp|Q13242|SRSF9_HUMAN	SRSF9	SRSF9_HUMAN Serine/arginine-rich splicing factor 9	211	PYQSRGSPHYFSP	33.6572	U	R.GS#PHYFSPFRPY.-	1	1	13.9698	7.58177	7.85648	8.32269	14.4329	10.4458	10.398	10.4235	5.45185	5.75411	5.36309
974	sp|P27986-4|P85A_HUMAN	PIK3R1	P85A_HUMAN Isoform 4 of Phosphatidylinositol 3-kinase regulatory subunit alpha	431	LYPVSKYQQDQVV	1000	R	K.Y#QQDQVVK.E	2	2	3.59207	5.81621	7.56428	12.5435	3.89472	6.5942	9.39891	8.68096	14.9375	12.5484	14.4292
719	sp|Q00839|HNRPU_HUMAN	HNRNPU	HNRPU_HUMAN Heterogeneous nuclear ribonucleoprotein U	271	KYSRAKSPQPPVE	53.5672	R	K.S#PQPPVEEEDEHFDDTVVCLDTYNCDLHFK.I	1	1	13.5469	7.92488	9.78912	7.46584	13.9393	10.4073	10.686	8.3839	6.27318	5.14043	6.44316
1808	sp|P05141|ADT2_HUMAN	SLC25A5	ADT2_HUMAN ADP/ATP translocase 2	195	AAYFGIYDTAKGM	30.8348	U	R.AAYFGIY#DTAK.G	2	1	10.7806	9.80772	9.80045	8.82617	10.8147	9.54624	10.8765	7.99229	7.55958	7.31033	6.6854
673	sp|Q12774|ARHG5_HUMAN	ARHGEF5	ARHG5_HUMAN Rho guanine nucleotide exchange factor 5	1370	RTEELIYLSQKIE	20.1669	R	R.TEELIY#LSQK.I	1	1	13.5594	7.91743	8.97923	7.76994	10.8011	11.4036	11.8986	8.56662	7.9384	5.7438	5.4218
2285	sp|Q9Y2H5|PKHA6_HUMAN	PLEKHA6	PKHA6_HUMAN Pleckstrin homology domain-containing family A member 6	492	PRSEDIYADPAAY	57.7111	R	R.SEDIY#ADPAAYVM*R.R	1	1	15.8559	12.9543	11.0122	6.61741	12.9746	7.73618	5.28331	3.60578	7.40309	9.36973	7.18741
2410	sp|Q7Z3K3|POGZ_HUMAN	POGZ	POGZ_HUMAN Pogo transposable element with ZNF domain	445	TPIPALSPPTKVP	25.1744	R	K.TAPVASTPSSTPIPALS#PPTK.V	1	1	13.8138	10.1181	8.0643	8.57958	12.6683	10.0276	9.88383	9.00095	5.84688	5.73629	6.26034
1567	sp|O00459|P85B_HUMAN	PIK3R2	P85B_HUMAN Phosphatidylinositol 3-kinase regulatory subunit beta	467	DQLYEEYTRTSQE	24.437	R	R.EYDQLYEEY#TR.T	1	1	6.0918	5.45226	6.59016	8.75466	6.63897	14.311	13.8477	14.4851	7.91641	5.4712	10.4407
2024	sp|P04040|CATA_HUMAN	CAT	CATA_HUMAN Catalase	84	GAGAFGYFEVTHD	36.5564	U	K.GAGAFGY#FEVTHDITK.Y	1	1	12.7082	8.19513	8.70143	9.03547	13.584	11.1031	10.7638	9.56536	5.75339	4.84017	5.74993
315	sp|Q09666|AHNK_HUMAN	AHNAK	AHNK_HUMAN Neuroblast differentiation-associated protein AHNAK	5836	SKSKGHYEVTGSD	57.7111	U	K.GHY#EVTGSDDETGK.L	3	3	1.30284	14.3122	8.24989	9.59509	2.001	9.39168	4.8113	5.53162	12.6728	18.2817	13.8499
797	sp|Q96A22|CK052_HUMAN	C11orf52	CK052_HUMAN Uncharacterized protein C11orf52	78	EDSNLHYADIQVC	49.3116	U	R.SPGLMSEDSNLHY#ADIQVCSRPHAR.E	2	2	7.88428	10.1865	10.0555	8.88448	9.13037	9.72163	8.9798	6.93332	10.4901	10.0403	7.69366
362	sp|P00533|EGFR_HUMAN	EGFR	EGFR_HUMAN Epidermal growth factor receptor	998	PTDSNFYRALMDE	24.2431	R	R.MHLPSPTDSNFY#R.A	3	3	5.57154	10.1798	10.5534	7.83795	5.4863	7.51308	6.3935	9.02264	10.2557	15.8377	11.3484
1147	sp|Q9H422|HIPK3_HUMAN	HIPK3	HIPK3_HUMAN Homeodomain-interacting protein kinase 3	362	CSTYLQSRYYRAP	20.1669	R	K.TVCS#TYLQS#R.Y	1	1	13.3019	8.37524	9.7205	8.27467	15.5362	10.3277	9.57176	6.82717	6.53885	6.39863	5.12744
1068	sp|Q7KZF4|SND1_HUMAN	SND1	SND1_HUMAN Staphylococcal nuclease domain-containing protein 1	329	LRIWRDYVAPTAN	76.7327	U	R.DY#VAPTANLDQK.D	3	3	1.79019	2.41312	3.87221	13.32	2.38361	6.73166	10.5327	18.6952	10.4116	9.36485	20.4848
944	sp|P07355-2|ANXA2_HUMAN	ANXA2	ANXA2_HUMAN Isoform 2 of Annexin A2	42	STPPSAYGSVKAY	30.8348	R	K.LSLEGDHSTPPSAY#GSVK.A	1	1	3.27467	7.50996	5.49013	6.07455	3.70424	11.8845	14.1804	16.0162	7.36568	13.0376	11.4622
277	sp|P68363|TBA1B_HUMAN	TUBA1B	TBA1B_HUMAN Tubulin alpha-1B chain	282	ISAEKAYHEQLSV	30.07	R	K.AY#HEQLSVAEITNACFEPANQM*VK.C	3	3	2.59912	12.9188	14.4062	14.2764	3.11961	12.2637	9.09601	8.07524	7.1857	7.08219	8.97697
2148	sp|Q96I25|SPF45_HUMAN	RBM17	SPF45_HUMAN Splicing factor 45	222	EQDRPRSPTGPSN	14.966	R	R.S#PTGPSNSFLANMGGTVAHK.I	1	1	9.6559	9.17542	11.6615	8.90794	9.38661	10.1495	10.6148	7.89835	7.79046	6.99628	7.76327
1387	sp|Q14680|MELK_HUMAN	MELK	MELK_HUMAN Maternal embryonic leucine zipper kinase	438	AVKNEEYFMFPEP	1000	R	K.NEEY#FM*FPEPK.T	2	1	8.11013	12.4625	10.4556	6.16486	8.12709	8.48276	7.00366	8.3689	9.45166	13.4654	7.90747
2795	sp|Q9UDY2-7|ZO2_HUMAN	TJP2	ZO2_HUMAN Isoform 7 of Tight junction protein ZO-2	292	RAYDPDYERAYSP	44.2778	R	R.AYDPDY#ER.A	1	1	7.73897	6.86787	7.0621	6.9154	7.62491	12.2984	10.1004	7.86713	10.9501	10.1968	12.3778
798	sp|Q96A22|CK052_HUMAN	C11orf52	CK052_HUMAN Uncharacterized protein C11orf52	103	LENATEYATLRFP	31.2747	U	K.HVHLENATEY#ATLR.F	2	2	3.80895	13.9482	14.5234	8.7265	2.56464	8.78335	7.69916	4.038	14.5165	12.4495	8.94177
1070	sp|P50402|EMD_HUMAN	EMD	EMD_HUMAN Emerin	49	TQRRRLSPPSSSA	22.4917	U	R.RLS#PPSSSAASSYSFSDLNSTR.G	1	1	10.2162	8.93866	9.47116	9.65374	10.8914	10.8828	9.89177	8.98856	7.13086	6.66394	7.27083
2876	sp|P61619|S61A1_HUMAN	SEC61A1	S61A1_HUMAN Protein transport protein Sec61 subunit alpha isoform 1	279	RGQYNTYPIKLFY	24.437	R	R.GQYNTY#PIK.L	1	1	7.99735	6.84365	5.46115	12.2812	7.46296	8.14778	9.09736	15.9673	7.2002	6.38584	13.1553
1018	sp|Q14247|SRC8_HUMAN	CTTN	SRC8_HUMAN Src substrate cortactin	141	SAVGFEYQGKTEK	123.857	R	K.SAVGFEY#QGK.T	1	1	8.57032	10.8256	7.93494	9.11585	7.65656	10.8825	8.75422	7.75668	8.73258	10.4723	9.29837
1661	sp|P55011|S12A2_HUMAN	SLC12A2	S12A2_HUMAN Solute carrier family 12 member 2	957	VVSVEYSKKSDLD	24.437	R	K.DVVVSVEYS#K.K	1	1	7.2616	6.88531	5.01215	16.0234	6.50614	4.33116	5.98897	16.7219	6.87996	5.78989	18.5995
1010	sp|Q9UJM3|ERRFI_HUMAN	ERRFI1	ERRFI_HUMAN ERBB receptor feedback inhibitor 1	394	KVSSTHYYLLPER	17.0091	U	K.VSSTHY#YLLPERPPYLDK.Y	3	2	3.11753	8.80351	13.2545	7.45417	4.08711	14.0365	12.3467	13.6299	6.34481	8.66998	8.25535
1878	sp|Q8IY95|TM192_HUMAN	TMEM192	TM192_HUMAN Transmembrane protein 192	213	LEEEKIYAYPSNI	48.8739	R	K.IY#AYPSNITSETGFR.T	1	1	10.6957	10.7592	12.5859	9.61422	15.291	9.37487	8.8111	7.20731	6.34491	4.30127	5.01449
935	sp|A1X283|SPD2B_HUMAN	SH3PXD2B	SPD2B_HUMAN SH3 and PX domain-containing protein 2B	226	PEEEEKYTVIYPY	24.437	R	K.Y#TVIYPYTAR.D	1	1	7.73204	5.66692	6.42056	8.99949	9.8809	8.9456	10.2049	17.8902	8.58494	6.51592	9.15851
1465	sp|Q02487|DSC2_HUMAN	DSC2	DSC2_HUMAN Desmocollin-2	839	RLGEKVYLCNQDE	1000	U	K.VY#LCNQDENHK.H	1	1	5.28708	7.6796	8.3747	10.8469	6.15636	11.1391	10.4131	11.3605	9.25059	8.5942	10.8979
559	sp|Q13263|TIF1B_HUMAN	TRIM28	TIF1B_HUMAN Transcription intermediary factor 1-beta	541	GTAPAGTPGAPPL	60.3582	R	R.GAAAAATGQPGTAPAGT#PGAPPLAGMAIVK.E	4	3	2.8238	3.41336	3.174	6.54472	2.97905	3.63854	4.55973	13.7491	12.3454	14.0353	32.7369
1845	sp|O94832|MYO1D_HUMAN	MYO1D	MYO1D_HUMAN Unconventional myosin-Id	435	PWKHIDYFNNQII	1000	R	K.HIDY#FNNQIIVDLVEQQHK.G	1	1	11.0742	6.56582	6.25937	11.0949	11.7916	10.6949	11.0927	10.6128	8.43675	6.54423	5.8327
2338	sp|Q9H1E3|NUCKS_HUMAN	NUCKS1	NUCKS_HUMAN Nuclear ubiquitous casein and cyclin-dependent kinase substrate 1	214	EDEEPESPPEKKT	50.1945	R	K.TPSPKEEDEEPES#PPEK.K	1	1	14.2809	9.89473	8.5785	8.54941	16.4147	10.4072	9.97858	7.68519	5.40436	4.56916	4.23728
320	sp|Q09666|AHNK_HUMAN	AHNAK	AHNK_HUMAN Neuroblast differentiation-associated protein AHNAK	5731	KGGVTGSPEASIS	15.0073	U	K.GGVTGS#PEASISGSK.G	1	1	11.6708	9.3491	9.5276	6.61744	11.124	10.5819	9.98694	8.02648	8.19629	7.49266	7.42682
973	sp|Q9H329-2|E41LB_HUMAN	EPB41L4B	E41LB_HUMAN Isoform 2 of Band 4.1-like protein 4B	493	DDSHFDYVHDQNQ	84.6094	U	K.ASASGDDSHFDY#VHDQNQK.N	2	2	5.36887	8.10095	9.32627	5.63199	4.96548	7.04665	5.82067	6.07588	12.663	23.924	11.0762
1590	sp|Q15262-3|PTPRK_HUMAN	PTPRK	PTPRK_HUMAN Isoform 3 of Receptor-type tyrosine-protein phosphatase kappa	917	NRAKNRYGNIIAY	73.6163	R	R.Y#GNIIAYDHSR.V	1	1	10.0748	7.55122	7.22025	8.19582	13.1529	9.75574	10.8135	13.3901	6.16981	5.7408	7.93504
1575	sp|P00505|AATM_HUMAN	GOT2	AATM_HUMAN Aspartate aminotransferase, mitochondrial	96	KNLDKEYLPIGGL	1000	U	K.EY#LPIGGLAEFCK.A	1	1	12.7845	9.01125	11.7046	7.6062	13.9905	9.37056	11.4537	10.8203	6.41599	3.19954	3.64288
1739	sp|Q13813-2|SPTN1_HUMAN	SPTAN1	SPTN1_HUMAN Isoform 2 of Spectrin alpha chain, non-erythrocytic 1	1073	KQVEELYHSLLEL	20.1669	R	K.QVEELY#HSLLELGEK.R	1	1	9.30427	6.08953	6.53193	10.5303	10.9597	8.08894	11.2712	15.7244	6.36123	5.9191	9.21929
593	sp|P56524|HDAC4_HUMAN	HDAC4	HDAC4_HUMAN Histone deacetylase 4	465	HRPLGRTQSAPLP	14.966	R	R.T#QSAPLPQNAQALQHLVIQQQHQQFLEK.H	1	1	14.7816	8.35935	9.55159	8.35137	16.4481	11.4943	9.49195	6.82985	5.52394	4.46676	4.70111
359	sp|P00533|EGFR_HUMAN	EGFR	EGFR_HUMAN Epidermal growth factor receptor	1081	GALTEDSIDDTFL	64.6536	R	R.YSSDPTGALTEDS#IDDTFLPVPEYINQSVPK.R	2	2	2.75888	14.6932	14.5541	8.58344	2.27546	10.9984	4.97512	5.5996	11.8846	13.6484	10.0289
2839	sp|Q13424|SNTA1_HUMAN	SNTA1	SNTA1_HUMAN Alpha-1-syntrophin	175	MKDVSPYFKNSTG	17.0091	U	K.DVSPY#FK.N	1	1	3.15868	5.77972	5.31545	4.58092	3.3646	7.39329	9.2762	6.74765	20.6752	19.5113	14.197
2433	sp|Q9P035|HACD3_HUMAN	PTPLAD1	HACD3_HUMAN Very-long-chain (3R)-3-hydroxyacyl-[acyl-carrier protein] dehydratase 3	316	FSFTLPYPVKIKV	37.5398	R	R.FSFTLPY#PVK.I	1	1	13.0011	8.90019	9.04798	7.0895	14.1394	11.8879	10.782	8.5721	5.44361	6.00594	5.13028
2579	sp|P11387|TOP1_HUMAN	TOP1	TOP1_HUMAN DNA topoisomerase 1	125	EPEDDGYFVPPKE	1000	U	K.DEPEDDGY#FVPPK.E	1	1	5.97001	9.1561	10.0955	9.5144	4.63669	9.51126	8.79507	6.09315	10.0265	13.6505	12.5508
652	sp|Q13191|CBLB_HUMAN	CBLB	CBLB_HUMAN E3 ubiquitin-protein ligase CBL-B	709	EEDDDEYKIPSSH	179.101	R	K.TRDPVEEDDDEY#K.I	1	1	3.68475	13.6071	16.0173	12.5012	3.29976	8.71924	4.68715	3.73815	10.5812	11.9485	11.2155
1476	sp|P29401-2|TKT_HUMAN	TKT	TKT_HUMAN Isoform 2 of Transketolase	283	QIIQEIYSQIQSK	48.3154	R	K.NM*AEQIIQEIY#SQIQSK.K	2	1	16.2588	9.46212	8.43807	8.09189	13.8798	10.5445	9.60598	8.23311	5.46915	3.94738	6.06915
823	sp|Q16625|OCLN_HUMAN	OCLN	OCLN_HUMAN Occludin	443	DTGLQEYKSLQSE	84.3587	R	K.RNFDTGLQEY#K.S	1	1	3.03306	2.22214	3.97087	11.0702	3.65057	7.48279	17.0474	22.6692	11.8605	12.1468	4.84641
2530	sp|Q9H857|NT5D2_HUMAN	NT5DC2	NT5D2_HUMAN 5'-nucleotidase domain-containing protein 2	456	RTFHNPTYFSRRL	13.3795	R	R.TFHNPT#YFSR.R	1	1	13.0248	9.84448	8.46957	8.69386	12.6875	10.3061	9.59957	7.8254	7.24431	6.49939	5.80504
514	sp|P46940|IQGA1_HUMAN	IQGAP1	IQGA1_HUMAN Ras GTPase-activating-like protein IQGAP1	172	PQIQDLYGKVDFT	1000	R	K.LGLAPQIQDLY#GK.V	1	1	13.4341	9.39393	7.91607	7.83455	9.5293	10.7709	8.18343	7.33187	8.76376	8.07201	8.77001
1622	sp|P12931-2|SRC_HUMAN	SRC	SRC_HUMAN Isoform 2 of Proto-oncogene tyrosine-protein kinase Src	193	ETTKGAYCLSVSD	23.6238	R	K.GAY#CLSVSDFDNAK.G	1	1	11.6506	10.1313	10.015	7.77522	13.2458	9.27671	7.27647	8.04087	8.08388	7.83559	6.6686
568	sp|P60709|ACTB_HUMAN	ACTB	ACTB_HUMAN Actin, cytoplasmic 1	198	ILTERGYSFTTTA	24.437	R	R.GY#SFTTTAER.E	1	1	3.01258	4.6276	7.49794	14.9409	3.09764	6.84386	10.469	16.3121	9.51942	8.44416	15.2348
526	sp|Q13480-2|GAB1_HUMAN	GAB1	GAB1_HUMAN Isoform 2 of GRB2-associated-binding protein 1	406	ASSQDCYDIPRAF	58.5514	R	K.DASSQDCY#DIPR.A	2	2	4.72146	12.4465	14.1508	7.47101	4.7108	12.8186	6.32725	5.93361	10.4327	12.2353	8.75199
1532	sp|P50395|GDIB_HUMAN	GDI2	GDIB_HUMAN Rab GDP dissociation inhibitor beta	442	RKKNDIYGEDxxx	1000	R	K.NDIY#GED.-	1	1	10.9437	10.425	9.52034	8.76962	12.3251	12.1588	9.21554	7.59305	6.37979	5.48664	7.18243
714	sp|O75886|STAM2_HUMAN	STAM2	STAM2_HUMAN Signal transducing adapter molecule 2	291	SEPEPVYIDEDKM	62.6585	R	K.KSEPEPVY#IDEDK.M	2	2	3.63215	5.25458	5.99406	16.4795	3.57532	6.65335	10.4353	16.7813	9.73484	7.85087	13.6087
2546	sp|Q9NZM3|ITSN2_HUMAN	ITSN2	ITSN2_HUMAN Intersectin-2	968	EEPEALYAAVNKK	1000	R	K.REEPEALY#AAVNK.K	1	1	7.58964	8.82832	9.46104	8.05242	8.34701	8.80905	7.80187	6.40394	11.4771	14.8444	8.38524
651	sp|P08754|GNAI3_HUMAN	GNAI3	GNAI3_HUMAN Guanine nucleotide-binding protein G(k) subunit alpha	61	IIHEDGYSEDECK	30.8348	U	K.IIHEDGY#SEDECK.Q	1	1	3.46241	5.16626	5.74924	10.0217	3.85994	10.6505	15.022	19.7865	8.71643	8.11371	9.45135
1247	sp|P04406|G3P_HUMAN	GAPDH	G3P_HUMAN Glyceraldehyde-3-phosphate dehydrogenase	184	VHAITATQKTVDG	73.3109	R	K.VIHDNFGIVEGLM*TTVHAITAT#QK.T	2	1	16.3196	8.93194	9.04857	9.19243	14.4876	8.04222	10.3362	9.60896	4.85994	3.74467	5.42782
516	sp|P46940|IQGA1_HUMAN	IQGAP1	IQGA1_HUMAN Ras GTPase-activating-like protein IQGAP1	1114	EASKLPYDVTPEQ	28.9337	R	K.SWVNQM*ESQTGEASKLPY#DVTPEQALAHEEVK.T	4	4	2.40927	4.1201	6.6579	9.61855	2.27266	8.20324	13.1802	13.6377	13.118	13.0175	13.7648
534	sp|P08865|RSSA_HUMAN	RPSA	RSSA_HUMAN 40S ribosomal protein SA	139	PLTEASYVNLPTI	19.8431	R	R.ADHQPLTEASY#VNLPTIALCNTDSPLR.Y	1	1	13.5292	9.45216	9.47014	7.22939	15.1674	10.2626	11.0516	9.06482	5.37245	3.42663	5.97353
1279	sp|O15231-6|ZN185_HUMAN	ZNF185	ZN185_HUMAN Isoform 6 of Zinc finger protein 185	613	ILFVKEYVNASEV	27.1205	R	K.EY#VNASEVSSGKPVSAR.Y	1	1	5.32119	7.81325	7.70343	6.49448	5.54766	9.08778	7.98946	6.25594	14.9752	17.0226	11.789
1735	sp|P53396|ACLY_HUMAN	ACLY	ACLY_HUMAN ATP-citrate synthase	682	RTTDGVYEGVAIG	31.2747	R	R.TTDGVY#EGVAIGGDR.Y	1	1	12.1008	8.96396	9.05609	7.83313	17.0569	10.044	10.0469	8.36922	4.9726	4.73726	6.81914
1414	sp|Q9UQC2|GAB2_HUMAN	GAB2	GAB2_HUMAN GRB2-associated-binding protein 2	643	SDEKVDYVQVDKE	1000	R	K.VDY#VQVDK.E	2	2	1.24687	24.7794	20.6755	9.36667	0.0793678	4.47377	2.6518	2.16339	15.7163	12.7878	6.05899
1319	sp|Q86X29|LSR_HUMAN	LSR	LSR_HUMAN Lipolysis-stimulated lipoprotein receptor	535	RSRDDLYDQDDSR	39.6629	R	R.SRDDLY#DQDDSRDFPR.S	1	1	5.67119	8.4262	11.8161	10.4127	6.14062	10.7682	6.49269	7.24533	10.2079	14.3734	8.44575
1322	sp|Q86X29|LSR_HUMAN	LSR	LSR_HUMAN Lipolysis-stimulated lipoprotein receptor	372	AGGQGSYVPLLRD	17.0091	R	R.SSSAGGQGSY#VPLLR.D	1	1	12.0691	9.74323	8.04438	8.50142	10.7246	8.98973	11.0489	8.22073	7.71492	8.45645	6.48665
931	sp|Q8N684-3|CPSF7_HUMAN	CPSF7	CPSF7_HUMAN Isoform 3 of Cleavage and polyadenylation specificity factor subunit 7	494	EDRHDDYFQERNR	1000	R	R.DLLHNEDRHDDY#FQER.N	2	1	9.36766	9.49008	8.37979	9.25807	11.0497	7.52793	9.89542	6.12801	9.83919	9.77276	9.29142
902	sp|Q9NUP9|LIN7C_HUMAN	LIN7C	LIN7C_HUMAN Protein lin-7 homolog C	58	EVYEHVYETVDIS	18.8054	U	R.EVYEHVY#ETVDISSSPEVR.A	1	1	12.7763	8.95826	9.16392	7.27846	13.1466	9.4593	11.0932	9.76828	5.95286	5.69128	6.71152
1988	sp|Q9UGK3-2|STAP2_HUMAN	STAP2	STAP2_HUMAN Isoform 2 of Signal-transducing adaptor protein 2	256	YEKVLGYVEADKE	1000	R	K.VLGY#VEADK.E	1	1	5.63114	11.1007	10.7885	8.41708	4.03304	13.0319	14.9754	7.90583	8.89841	9.19622	6.02176
2224	sp|P31949|S10AB_HUMAN	S100A11	S10AB_HUMAN Protein S100-A11	32	GKDGYNYTLSKTE	24.437	U	K.DGYNY#TLSK.T	1	1	2.00994	6.09383	6.73805	12.032	3.15705	9.00038	12.1593	17.5189	8.82501	8.57979	13.8858
2288	sp|P55196-5|AFAD_HUMAN	MLLT4	AFAD_HUMAN Isoform 5 of Afadin	1229	QTYTREYFTFPAS	17.0091	R	R.EY#FTFPASK.S	1	1	5.51351	13.8998	10.3458	8.50106	5.92068	8.81366	7.36317	6.43361	9.81598	13.036	10.3568
890	sp|Q9NYB9|ABI2_HUMAN	ABI2	ABI2_HUMAN Abl interactor 2	213	PVVPNDYVPSPTR	26.9265	R	R.TLEPVRPPVVPNDY#VPSPTR.N	1	1	5.23097	13.2302	12.3137	6.65932	4.2715	13.8498	9.15161	5.32563	12.8122	8.84558	8.30953
840	sp|P12236|ADT3_HUMAN	SLC25A6	ADT3_HUMAN ADP/ATP translocase 3	81	LANVIRYFPTQAL	53.5337	R	R.Y#FPTQALNFAFK.D	1	1	12.5662	9.67687	10.4779	5.87851	11.999	9.88968	12.1488	11.7599	5.87132	4.64555	5.08635
599	sp|Q96AE4-2|FUBP1_HUMAN	FUBP1	FUBP1_HUMAN Isoform 2 of Far upstream element-binding protein 1	60	NSNDYGYGGQKRP	76.7327	R	K.IGGDAGTSLNSNDYGY#GGQK.R	1	1	6.82571	10.7272	9.72426	10.4266	5.33278	8.91883	6.03434	4.70324	11.1746	11.8982	14.2343
1981	sp|P46108|CRK_HUMAN	CRK	CRK_HUMAN Adapter molecule crk	108	EFYKIHYLDTTTL	45.026	R	K.IHY#LDTTTLIEPVSR.S	1	1	7.69366	6.94373	7.63148	7.71471	11.6088	11.0359	12.868	13.5375	6.71571	7.12841	7.12208
2118	sp|Q8NI35|INADL_HUMAN	INADL	INADL_HUMAN InaD-like protein	393	SHTGEASGIYVKS	15.0073	R	R.IVGYVGTSHTGEAS#GIYVK.S	1	1	9.74423	9.26393	9.34293	7.76683	12.4678	10.1107	9.58285	10.2454	7.80482	6.77865	6.89194
1178	sp|O95208|EPN2_HUMAN	EPN2	EPN2_HUMAN Epsin-2	17	KNIVNNYSEAEIK	30.8348	R	K.NIVNNY#SEAEIK.V	2	2	4.00991	3.56093	4.57156	14.9796	4.67084	7.39259	11.3518	15.7564	9.16485	9.06418	15.4773
832	sp|P41567|EIF1_HUMAN	EIF1	EIF1_HUMAN Eukaryotic translation initiation factor 1	30	PAGTEDYIHIRIQ	57.7111	R	K.GDDLLPAGTEDY#IHIR.I	1	1	7.41706	7.27342	6.52028	11.4892	8.51169	6.98361	9.57671	18.2625	8.19007	6.39012	9.38538
856	sp|P51991|ROA3_HUMAN	HNRNPA3	ROA3_HUMAN Heterogeneous nuclear ribonucleoprotein A3	145	EYNLRDYFEKYGK	111.687	R	K.EDTEEYNLRDY#FEK.Y	1	1	5.34947	5.20939	4.69395	12.1305	5.8046	7.66542	11.4465	26.8938	7.0416	6.17435	7.59041
1021	sp|Q14247|SRC8_HUMAN	CTTN	SRC8_HUMAN Src substrate cortactin	334	TQVSSAYQKTVPV	20.1669	R	K.NASTFEDVTQVSSAY#QK.T	1	1	10.1325	7.63502	10.1919	8.40798	9.33425	11.7066	8.63252	7.67566	8.58009	8.0928	9.61064
2146	sp|Q13884|SNTB1_HUMAN	SNTB1	SNTB1_HUMAN Beta-1-syntrophin	87	GAQPPDSPAGVRT	1000	R	R.GAGAGHPGAGGAQPPDS#PAGVR.T	1	1	13.8407	8.10965	10.4434	6.47687	15.4405	9.11933	8.95102	6.12064	8.97643	6.05255	6.46886
2225	sp|Q03135|CAV1_HUMAN	CAV1	CAV1_HUMAN Caveolin-1	6	xMSGGKYVDSEGH	15.0073	U	K.Y#VDSEGHLYTVPIR.E	1	1	5.80962	15.0925	13.7428	10.0494	6.65123	6.86367	6.68045	8.63343	7.48042	10.5487	8.4478
1564	sp|O00459|P85B_HUMAN	PIK3R2	P85B_HUMAN Phosphatidylinositol 3-kinase regulatory subunit beta	453	KVYHQQYQDKSRE	58.5514	R	K.VYHQQY#QDK.S	1	1	2.45322	2.9316	5.11141	10.5301	3.06668	12.3632	17.1653	15.6864	11.5259	9.68015	9.48612
2886	sp|Q14160-3|SCRIB_HUMAN	SCRIB	SCRIB_HUMAN Isoform 3 of Protein scribble homolog	1360	FRERQKYFELEVR	1000	R	K.Y#FELEVR.V	1	1	12.1634	9.13688	9.53161	11.2382	10.4095	8.45209	9.86293	7.51252	8.92921	6.81054	5.95314
865	sp|Q6IBS0|TWF2_HUMAN	TWF2	TWF2_HUMAN Twinfilin-2	309	LTAEFLYDEVHPK	101.329	U	K.KIEIGDGAELTAEFLY#DEVHPK.Q	1	1	11.262	7.19935	8.54792	9.52837	10.8107	6.99464	10.3296	17.3991	5.88819	3.75437	8.28574
1017	sp|Q14247|SRC8_HUMAN	CTTN	SRC8_HUMAN Src substrate cortactin	178	SAVGFDYQGKTEK	123.857	R	K.SAVGFDY#QGK.T	1	1	6.93216	11.4187	9.44123	8.99131	7.20846	9.42671	7.57373	6.69804	10.7583	10.716	10.8353
2513	sp|Q8N3F8|MILK1_HUMAN	MICALL1	MILK1_HUMAN MICAL-like protein 1	760	RQADVEYELRCLL	1000	R	R.QADVEY#ELR.C	1	1	10.3953	7.17318	6.90881	9.19652	8.65971	9.29595	9.57438	16.7573	6.84666	5.72941	9.46278
841	sp|P12236|ADT3_HUMAN	SLC25A6	ADT3_HUMAN ADP/ATP translocase 3	191	IIYRAAYFGVYDT	20.1669	R	R.AAY#FGVYDTAK.G	1	1	12.1278	7.89484	8.59624	10.123	11.2891	10.4369	11.8717	8.23978	6.33652	6.06934	7.01472
311	sp|Q09666|AHNK_HUMAN	AHNAK	AHNK_HUMAN Neuroblast differentiation-associated protein AHNAK	5089	TMFGKMYFPDVEF	1000	U	K.M*Y#FPDVEFDIK.S	4	2	2.59888	15.7503	8.80837	8.96117	3.18549	9.33887	5.77951	5.99854	13.7702	15.9245	9.88416
1071	sp|Q9UIQ6|LCAP_HUMAN	LNPEP	LCAP_HUMAN Leucyl-cystinyl aminopeptidase	46	EPDEVEYEPRGSR	1000	R	K.EPCLHPLEPDEVEY#EPR.G	1	1	6.79308	6.75204	7.98256	13.3016	6.55458	8.30114	8.51916	12.6341	6.30004	9.26634	13.5954
1876	sp|P41240|CSK_HUMAN	CSK	CSK_HUMAN Tyrosine-protein kinase CSK	64	GIIPANYVQKREG	1000	R	R.EGIIPANY#VQK.R	2	2	6.64243	7.61863	8.77954	16.3678	6.61192	9.7077	12.1687	8.88142	8.16911	7.23354	7.81918
1084	sp|Q99569|PKP4_HUMAN	PKP4	PKP4_HUMAN Plakophilin-4	1168	LKSTTNYVDFYST	30.8348	R	K.STTNY#VDFYSTK.R	1	1	6.15609	10.6447	11.0734	6.84714	4.93023	7.5246	6.95451	4.7801	13.3865	16.5685	11.1343
1292	sp|P13797|PLST_HUMAN	PLS3	PLST_HUMAN Plastin-3	127	YSEEEKYAFVNWI	1000	R	K.Y#AFVNWINK.A	1	1	12.5618	8.58832	9.9149	7.12904	15.9009	9.53555	9.56445	8.93002	6.012	3.9472	7.9158
2142	sp|O95721|SNP29_HUMAN	SNAP29	SNP29_HUMAN Synaptosomal-associated protein 29	189	AMSTDAYPKNPHL	104.477	R	R.GAGSAM*STDAY#PK.N	1	1	2.94636	7.29124	9.6558	10.5563	3.58965	12.5924	11.5328	8.54343	13.4798	10.9051	8.90709
1738	sp|Q13813-2|SPTN1_HUMAN	SPTAN1	SPTN1_HUMAN Isoform 2 of Spectrin alpha chain, non-erythrocytic 1	1261	ALNTDNYGHDLAS	23.6238	R	K.NQALNTDNY#GHDLASVQALQR.K	1	1	12.1789	8.8905	9.19232	9.47272	12.0088	10.9	7.64185	9.43264	6.87469	7.25618	6.15148
2625	sp|O00571|DDX3X_HUMAN	DDX3X	DDX3X_HUMAN ATP-dependent RNA helicase DDX3X	266	YGRRKQYPISLVL	24.2431	R	K.QY#PISLVLAPTR.E	1	1	13.8326	8.87659	7.7559	10.2385	12.9742	9.03033	9.43228	6.05578	8.00521	6.7055	7.09311
691	sp|P05023|AT1A1_HUMAN	ATP1A1	AT1A1_HUMAN Sodium/potassium-transporting ATPase subunit alpha-1	684	LDDILKYHTEIVF	20.1669	R	K.Y#HTEIVFAR.T	1	1	15.6944	10.0793	7.69654	10.0727	13.1491	9.8197	9.48072	6.44698	6.66474	5.23308	5.66266
1789	sp|Q8N4S9|MALD2_HUMAN	MARVELD2	MALD2_HUMAN MARVEL domain-containing protein 2	23	VPSDLPYQDTTIR	15.0073	R	R.RYDEVPSDLPY#QDTTIR.T	1	1	9.66601	9.25519	8.472	8.31895	11.4426	7.2939	6.15112	6.53798	10.0046	13.9196	8.9381
2677	sp|Q9H8Y8|GORS2_HUMAN	GORASP2	GORS2_HUMAN Golgi reassembly-stacking protein 2	225	MAGTPITPLKDGF	23.6238	R	K.ISLPGQM*AGTPIT#PLK.D	1	1	12.3584	8.17249	11.5	12.9012	7.22057	9.44279	8.06375	9.01038	7.9272	6.00104	7.40219
515	sp|P46940|IQGA1_HUMAN	IQGAP1	IQGA1_HUMAN Ras GTPase-activating-like protein IQGAP1	1526	YGEQVDYYKSYIK	30.8348	R	K.ATFYGEQVDY#YK.S	2	2	6.09864	5.47872	5.96048	11.1011	4.44724	7.09682	10.5391	19.2248	6.75677	8.48232	14.814
1534	sp|P50395|GDIB_HUMAN	GDI2	GDIB_HUMAN Rab GDP dissociation inhibitor beta	203	YLDQPCYETINRI	17.0091	R	R.TDDYLDQPCY#ETINR.I	1	1	14.3522	13.3571	6.82718	6.96646	16.7127	9.69116	9.86531	7.1432	5.46176	3.98037	5.64261
2648	sp|Q8TEW0|PARD3_HUMAN	PARD3	PARD3_HUMAN Partitioning defective 3 homolog	386	SRFSPDSQYIDNR	17.0091	R	R.FSPDS#QYIDNR.S	1	1	14.2618	8.99783	8.76984	8.62418	13.3029	8.86656	10.1903	8.4989	6.72404	6.05704	5.70657
1810	sp|O00233|PSMD9_HUMAN	PSMD9	PSMD9_HUMAN 26S proteasome non-ATPase regulatory subunit 9	62	LVDCEGYPRSDVD	1000	R	K.GIGM*NEPLVDCEGY#PR.S	4	2	6.64337	8.93829	8.58903	12.6669	6.75632	11.9467	13.0109	8.85623	7.96497	6.75971	7.86758
587	sp|P25787|PSA2_HUMAN	PSMA2	PSA2_HUMAN Proteasome subunit alpha type-2	97	RKLAQQYYLVYQE	17.0091	R	K.LAQQY#YLVYQEPIPTAQLVQR.V	1	1	13.6862	7.18486	8.18984	8.2996	15.1637	10.4065	7.76734	9.03952	7.24638	6.80301	6.21308
1466	sp|Q02487|DSC2_HUMAN	DSC2	DSC2_HUMAN Desmocollin-2	853	HKHAQDYVLTYNY	87.265	U	K.HAQDY#VLTYNYEGR.G	2	2	3.96914	9.20673	6.37937	10.8031	4.59034	8.93058	8.90845	10.3458	11.2081	14.3759	11.2824
2357	sp|P42680|TEC_HUMAN	TEC	TEC_HUMAN Tyrosine-protein kinase Tec	228	KYGNEGYIPSNYV	23.6238	U	K.YGNEGY#IPSNYVTGK.K	1	1	5.24191	5.65074	6.65417	9.10227	6.20562	13.3879	14.5309	15.2605	8.9032	7.74231	7.32045
1717	sp|Q9H792|PEAK1_HUMAN	PEAK1	PEAK1_HUMAN Pseudopodium-enriched atypical kinase 1	635	VINPNAYDNLAIY	73.6163	R	K.VPIVINPNAY#DNLAIYK.S	1	1	7.40477	2.60672	2.3701	3.50176	7.85927	7.03729	5.91467	6.56761	20.0618	20.5506	16.1254
1462	sp|P29317|EPHA2_HUMAN	EPHA2	EPHA2_HUMAN Ephrin type-A receptor 2	628	GEFGEVYKGMLKT	1000	U	K.VIGAGEFGEVY#K.G	1	1	12.5517	8.68995	8.92246	10.3161	12.4582	9.15685	11.6005	9.24082	6.49899	5.02595	5.5385
1515	sp|O60684|IMA7_HUMAN	KPNA6	IMA7_HUMAN Importin subunit alpha-7	474	GLIEEAYGLDKIE	111.739	R	R.SGSGVNPYCGLIEEAY#GLDK.I	1	1	13.4948	7.48525	7.55149	7.92255	10.9121	8.22648	11.2157	11.9039	7.9479	5.57464	7.7652
316	sp|Q09666|AHNK_HUMAN	AHNAK	AHNK_HUMAN Neuroblast differentiation-associated protein AHNAK	964	PKVKGEYDMTVPK	33.6572	U	K.VKGEY#DMTVPK.L	1	1	1.41594	10.9429	8.62364	9.2253	1.54637	9.00916	7.11033	5.94877	15.2097	18.6628	12.3052
2326	sp|Q8N6M0|OTU6B_HUMAN	OTUD6B	OTU6B_HUMAN OTU domain-containing protein 6B	272	VYMRHAYGLGEHY	124.374	U	R.HAY#GLGEHYNSVTR.L	1	1	11.6705	8.53142	7.92772	11.0022	9.58313	8.62023	7.80904	6.29166	8.25274	9.34382	10.9676
13	sp|O60716|CTND1_HUMAN	CTNND1	CTND1_HUMAN Catenin delta-1	228	PGGSDNYGSLSRV	13.3795	R	R.HYEDGYPGGSDNY#GSLSR.V	1	1	6.87891	11.3812	8.96653	5.32981	7.10189	6.61449	3.66363	4.21943	9.44809	22.1699	14.2262
2486	sp|Q7Z699|SPRE1_HUMAN	SPRED1	SPRE1_HUMAN Sprouty-related, EVH1 domain-containing protein 1	292	DSKKSDYLYSCGD	31.2747	U	K.KSDY#LYSCGDETK.L	1	1	8.05192	10.6768	8.28509	6.8874	8.63307	7.91008	8.80631	7.48021	12.5065	11.4757	9.28698
2	sp|P46109|CRKL_HUMAN	CRKL	CRKL_HUMAN Crk-like protein	127	AEDNLEYVRTLYD	14.0028	U	R.YPSPPMGSVSAPNLPTAEDNLEY#VR.T	1	1	11.3565	8.53335	9.26985	8.42458	11.9905	12.4511	9.47743	8.45299	7.44638	4.88218	7.71511
2816	sp|P98172|EFNB1_HUMAN	EFNB1	EFNB1_HUMAN Ephrin-B1	317	NNYCPHYEKVSGD	45.598	U	R.TTENNY#CPHY#EK.V	1	1	13.1451	8.15885	6.74335	6.6162	14.5321	11.7263	11.7322	7.14064	7.70643	6.58596	5.9129
1660	sp|P55011|S12A2_HUMAN	SLC12A2	S12A2_HUMAN Solute carrier family 12 member 2	275	RDAVVTYTAESKG	24.437	R	R.DAVVTY#TAESK.G	1	1	3.36196	5.11158	5.65869	14.1461	3.18635	8.3587	8.37013	17.287	10.9014	7.96347	15.6547
900	sp|Q01082|SPTB2_HUMAN	SPTBN1	SPTB2_HUMAN Spectrin beta chain, non-erythrocytic 1	2249	AASGIPYHSEVPV	44.2778	U	K.TAASGIPY#HSEVPVSLK.E	1	1	2.39375	3.84456	5.52695	13.0173	3.11432	7.79507	12.3742	27.0041	6.7023	6.24753	11.9798
596	sp|Q15464|SHB_HUMAN	SHB	SHB_HUMAN SH2 domain-containing adapter protein B	336	DRPADEYDQPWEW	1000	U	K.LPQDDDRPADEY#DQPWEWNR.V	2	2	7.05927	9.52949	9.01756	10.5987	8.2474	11.5036	8.96751	7.86071	10.1468	8.63999	8.42899
2177	sp|Q15427|SF3B4_HUMAN	SF3B4	SF3B4_HUMAN Splicing factor 3B subunit 4	16	NQDATVYVGGLDE	17.0091	U	R.NQDATVY#VGGLDEK.V	1	1	9.61379	6.64981	6.9077	8.15284	12.0613	9.07706	10.0419	14.6957	8.32377	6.16462	8.31152
2561	sp|Q96CN7|ISOC1_HUMAN	ISOC1	ISOC1_HUMAN Isochorismatase domain-containing protein 1	160	VIVTEQYPKGLGS	33.6572	R	R.ILGIPVIVTEQY#PK.G	1	1	12.7597	10.0962	9.58202	8.54718	14.7239	11.9849	8.59342	6.20061	6.48586	5.24289	5.78329
2027	sp|P07737|PROF1_HUMAN	PFN1	PROF1_HUMAN Profilin-1	129	LINKKCYEMASHL	99.2279	R	K.CY#EMASHLR.R	1	1	11.9719	8.10767	9.75745	10.33	12.3974	8.80622	9.72468	8.08106	6.73663	6.97194	7.11502
2637	sp|Q86X27|RGPS2_HUMAN	RALGPS2	RGPS2_HUMAN Ras-specific guanine nucleotide-releasing factor RalGPS2	278	FVEDDNYKLSLKI	1000	R	K.FVEDDNY#K.L	1	1	3.41851	6.33713	8.19691	9.89561	3.34921	11.3331	16.0918	12.1086	10.9267	9.20475	9.13769
2324	sp|P30085|KCY_HUMAN	CMPK1	KCY_HUMAN UMP-CMP kinase	49	KNPDSQYGELIEK	17.0091	R	K.NPDSQY#GELIEK.Y	1	1	3.56017	6.5604	6.96503	9.97882	4.23746	10.4925	12.6203	11.6573	14.4005	9.42794	10.0996
1107	sp|P51149|RAB7A_HUMAN	RAB7A	RAB7A_HUMAN Ras-related protein Rab-7a	72	GQERFQSLGVAFY	71.7529	R	R.FQS#LGVAFYR.G	1	1	2.99669	2.25553	6.05795	8.96324	2.49736	18.1462	22.3207	8.80262	12.6459	8.81903	6.49477
2556	sp|O43491|E41L2_HUMAN	EPB41L2	E41L2_HUMAN Band 4.1-like protein 2	623	VEGDNIYVRHSNL	1000	R	R.VEGDNIY#VR.H	1	1	2.30138	5.33866	6.40036	7.28554	3.0619	4.68675	5.96933	7.24007	16.0955	20.8359	20.7846
766	sp|Q16181|SEPT7_HUMAN	42985	SEPT7_HUMAN Septin-7	319	KLAAVTYNGVDNN	17.0091	R	K.LAAVTY#NGVDNNK.N	1	1	10.3403	9.97795	7.88927	10.1362	10.6462	8.60821	10.01	9.82842	8.61433	7.87549	6.07366
557	sp|P43003|EAA1_HUMAN	SLC1A3	EAA1_HUMAN Excitatory amino acid transporter 1	523	NEMKKPYQLIAQD	140.089	R	K.KPY#QLIAQDNETEKPIDSETK.M	1	1	2.91334	2.42406	3.0677	30.6756	4.1424	3.46366	2.7631	16.9018	5.72573	4.35578	23.5668
2623	sp|P62487|RPB7_HUMAN	POLR2G	RPB7_HUMAN DNA-directed RNA polymerase II subunit RPB7	17	ILLHPRYFGPNLL	27.1205	R	R.Y#FGPNLLNTVK.Q	1	1	13.1168	8.92518	8.90547	10.593	14.0922	10.8869	9.46291	6.86736	5.72683	4.86278	6.56053
482	sp|Q06124|PTN11_HUMAN	PTPN11	PTN11_HUMAN Tyrosine-protein phosphatase non-receptor type 11	546	KRKGHEYTNIKYS	30.8348	R	K.GHEY#TNIK.Y	1	1	4.65426	17.577	16.1221	11.5678	2.32237	3.65191	4.21295	3.67397	15.2719	13.2002	7.74561
653	sp|Q13191|CBLB_HUMAN	CBLB	CBLB_HUMAN E3 ubiquitin-protein ligase CBL-B	763	IPDLSIYLKGDVF	31.2747	R	K.SNIPDLSIY#LK.G	2	1	4.0839	15.6975	18.2152	9.15232	2.92526	7.93693	3.87871	3.11096	10.5799	13.3974	11.0219
319	sp|Q09666|AHNK_HUMAN	AHNAK	AHNK_HUMAN Neuroblast differentiation-associated protein AHNAK	160	TRRVTAYTVDVTG	17.0091	U	R.RVTAY#TVDVTGR.E	1	1	6.85265	12.5486	10.1247	10.5844	7.46396	9.92707	8.06233	6.94696	8.51183	9.47862	9.49881
905	sp|P40763|STAT3_HUMAN	STAT3	STAT3_HUMAN Signal transducer and activator of transcription 3	727	TIDLPMSPRTLDS	29.3762	R	K.FICVTPTTCSNTIDLPM*S#PR.T	1	1	11.4167	9.3138	9.68215	7.7618	6.16891	10.334	12.0871	8.76175	8.98524	7.42252	8.06613
1083	sp|Q99569|PKP4_HUMAN	PKP4	PKP4_HUMAN Plakophilin-4	1143	HSYEDPYFDDRVH	36.5564	R	R.LYLQSPHSYEDPY#FDDR.V	1	1	9.57359	8.83811	9.89293	8.75111	9.66748	12.0028	7.67502	9.83342	8.97745	7.91113	6.87692
2563	sp|Q5T5P2|SKT_HUMAN	KIAA1217	SKT_HUMAN Sickle tail protein homolog	244	DESRNVYYELNDV	30.8348	R	R.NVY#YELNDVR.N	1	1	11.2225	7.39444	7.88461	11.1145	12.5929	7.7615	9.03888	7.75006	9.23975	8.24556	7.75526
2766	sp|P00491|PNPH_HUMAN	PNP	PNPH_HUMAN Purine nucleoside phosphorylase	249	NKVIMDYESLEKA	17.0091	U	K.VIMDY#ESLEK.A	1	1	7.00378	7.88455	9.48475	11.0605	4.96163	10.6954	9.94984	11.8546	9.00436	8.32688	9.77375
2803	sp|Q96RT1-8|LAP2_HUMAN	ERBB2IP	LAP2_HUMAN Isoform 8 of Protein LAP2	1104	QIPEGDYLSYREF	48.8739	R	R.AQIPEGDY#LSYR.E	1	1	6.91913	12.5447	10.4173	7.2621	7.58304	9.67316	7.55354	4.42776	10.7067	13.5054	9.40721
2134	sp|P98077|SHC2_HUMAN	SHC2	SHC2_HUMAN SHC-transforming protein 2	398	APPGDGYVQADAR	24.2217	U	R.DACSLPWDVGSTGTAPPGDGY#VQADAR.G	1	1	6.09583	9.23297	10.8775	9.39307	6.02701	11.4416	11.1595	10.4461	8.44593	8.70767	8.17283
1492	sp|Q92974|ARHG2_HUMAN	ARHGEF2	ARHG2_HUMAN Rho guanine nucleotide exchange factor 2	125	RPSSAIYPSDSFR	20.1669	R	R.ERPSSAIY#PSDSFR.Q	1	1	6.28776	6.41485	6.09162	9.9955	5.03637	8.03222	8.18182	7.11185	13.0776	14.2626	15.5078
2254	sp|Q15286|RAB35_HUMAN	RAB35	RAB35_HUMAN Ras-related protein Rab-35	5	xxMARDYDHLFKL	1000	R	R.DY#DHLFK.L	1	1	2.87662	4.43953	4.84756	7.71774	2.84527	9.37555	12.8202	11.4909	14.2214	13.607	15.7582
716	sp|O75886|STAM2_HUMAN	STAM2	STAM2_HUMAN Signal transducing adapter molecule 2	374	APVYSVYSKLHPP	17.0091	U	K.LVNEAPVYSVY#SK.L	1	1	3.52924	6.61227	6.699	14.9658	3.37993	7.73201	5.85131	7.63331	10.7816	13.6732	19.1423
2790	sp|Q6NZI2|PTRF_HUMAN	PTRF	PTRF_HUMAN Polymerase I and transcript release factor	156	NFKVMIYQDEVKL	1000	U	K.VM*IY#QDEVK.L	1	1	4.68039	6.4653	9.89888	10.6772	4.4186	9.16797	10.4549	11.9842	10.1641	8.45657	13.6319
731	sp|O43707|ACTN4_HUMAN	ACTN4	ACTN4_HUMAN Alpha-actinin-4	265	TYVSSFYHAFSGA	18.6027	R	K.AIM*TYVSSFY#HAFSGAQK.A	1	1	10.2254	7.48963	8.14197	7.282	10.4967	11.6401	12.6787	12.8245	6.3055	5.3731	7.54235
1836	sp|P16144|ITB4_HUMAN	ITGB4	ITB4_HUMAN Integrin beta-4	1207	AQGEGPYSSLVSC	20.1669	R	K.VCAYGAQGEGPY#SSLVSCR.T	1	1	9.58768	9.09699	8.89661	8.9729	12.071	9.06151	10.8074	7.39544	7.64263	7.26327	9.20456
2776	sp|Q12965|MYO1E_HUMAN	MYO1E	MYO1E_HUMAN Unconventional myosin-Ie	974	RNQYVPYPHAPGS	23.6238	U	R.NQYVPY#PHAPGSQR.S	1	1	11.2108	9.19979	9.74581	9.07949	10.6894	8.89427	8.84192	8.24227	8.92649	7.4697	7.70003
2678	sp|Q9H8Y8|GORS2_HUMAN	GORASP2	GORS2_HUMAN Golgi reassembly-stacking protein 2	222	PGQMAGTPITPLK	23.6238	R	K.ISLPGQM*AGT#PITPLK.D	1	1	7.1121	3.6566	5.68949	8.68662	6.82953	6.62308	6.82978	19.0018	9.8662	10.5642	15.1406
551	sp|P42685|FRK_HUMAN	FRK	FRK_HUMAN Tyrosine-protein kinase FRK	99	SQQLQGYIPSNYV	71.9493	U	R.DGSSQQLQGY#IPSNYVAEDR.S	1	1	6.15545	7.87661	8.64951	7.718	5.97589	10.2783	8.39915	10.9268	11.8423	11.3653	10.8128
449	sp|P18433|PTPRA_HUMAN	PTPRA	PTPRA_HUMAN Receptor-type tyrosine-protein phosphatase alpha	271	NKEKNRYVNILPY	62.6585	R	R.Y#VNILPYDHSR.V	1	1	9.05066	6.0762	8.56832	10.3518	11.5801	9.46504	11.7634	10.414	7.78333	7.41714	7.53002
2185	sp|Q5T0N5|FBP1L_HUMAN	FNBP1L	FBP1L_HUMAN Formin-binding protein 1-like	566	KEGEVLYIIEEDK	1000	R	K.EGEVLY#IIEEDK.G	1	1	4.16421	4.24492	3.45123	12.5054	3.79267	8.88997	12.2046	23.1185	7.38473	7.6333	12.6104
553	sp|P42685|FRK_HUMAN	FRK	FRK_HUMAN Tyrosine-protein kinase FRK	193	NEFVSHYTKTSDG	30.8348	R	R.IFSTLNEFVSHY#TK.T	1	1	8.7959	9.36154	12.0995	7.11884	9.31325	11.594	10.1572	8.22448	7.68728	9.43371	6.21436
1298	sp|Q5JRA6|MIA3_HUMAN	MIA3	MIA3_HUMAN Melanoma inhibitory activity protein 3	1678	VSGGECSPPLTVE	23.6238	R	R.RGPLSQNGSFGPSPVSGGECS#PPLTVEPPVRPLSATLNR.R	1	1	10.9182	8.47883	12.0757	8.20617	14.1382	11.5844	10.2175	10.2739	4.40337	5.16284	4.54084
1258	sp|P35222|CTNB1_HUMAN	CTNNB1	CTNB1_HUMAN Catenin beta-1	675	DYKKRLSVELTSS	36.5564	R	K.RLS#VELTSSLFR.T	1	1	7.86558	7.7633	7.97073	7.07351	11.2462	11.0677	13.6013	8.94089	8.84502	7.43827	8.18748
1020	sp|Q14247|SRC8_HUMAN	CTTN	SRC8_HUMAN Src substrate cortactin	446	TEPEPVYSMEAAD	27.0548	R	R.GPVSGTEPEPVY#SM*EAADYR.E	1	1	11.0851	11.5588	8.08341	8.14622	14.0247	8.50721	8.14271	6.07483	7.97711	7.84425	8.55566
869	sp|Q07912|ACK1_HUMAN	TNK2	ACK1_HUMAN Activated CDC42 kinase 1	859	KVSSTHYYLLPER	17.0091	R	K.VSSTHY#YLLPERPSYLER.Y	1	1	6.38765	9.7122	10.6186	9.42387	6.9754	10.889	10.5517	10.8077	8.58995	7.2384	8.80551
1769	sp|Q15149|PLEC_HUMAN	PLEC	PLEC_HUMAN Plectin	4642	AGSRRGSFDATGS	16.144	R	R.RGS#FDATGSGFSMTFSSSSYSSSGYGR.R	1	1	8.2599	8.00836	12.0119	7.96226	7.30167	12.0582	8.04233	7.63487	10.3523	8.85576	9.51238
684	sp|P19174-2|PLCG1_HUMAN	PLCG1	PLCG1_HUMAN Isoform 2 of 1-phosphatidylinositol 4,5-bisphosphate phosphodiesterase gamma-1	771	GTAEPDYGALYEG	44.2778	R	K.IGTAEPDY#GALYEGR.N	1	1	3.81345	15.7421	10.5491	5.83252	3.83079	6.40762	6.08458	6.45601	10.7873	18.8387	11.6578
1086	sp|Q99569|PKP4_HUMAN	PKP4	PKP4_HUMAN Plakophilin-4	1115	LQHQQLYYSQDDS	17.0091	R	R.LQHQQLY#YSQDDSNR.K	1	1	9.20515	9.36484	5.38069	11.6868	12.2041	11.3405	13.3884	10.2147	7.20273	6.26991	3.74207
2858	sp|Q15907|RB11B_HUMAN	RAB11B	RB11B_HUMAN Ras-related protein Rab-11B	8	GTRDDEYDYLFKV	17.0091	R	R.DDEY#DYLFK.V	1	1	8.12019	8.0759	8.64499	8.87928	10.6207	10.3608	9.47305	9.59025	8.86073	8.25182	9.12233
398	sp|Q15019-2|SEPT2_HUMAN	42980	SEPT2_HUMAN Isoform 2 of Septin-2	52	NPETPGYVGFANL	57.7111	R	K.QQPTQFINPETPGY#VGFANLPNQVHR.K	3	1	6.14442	10.2373	9.83196	9.87016	8.07521	8.86058	7.78554	7.53454	9.72187	10.0005	11.9379
1318	sp|Q86X29|LSR_HUMAN	LSR	LSR_HUMAN Lipolysis-stimulated lipoprotein receptor	615	EEEEEAYYPPAPP	48.8739	R	K.EEEEEAY#YPPAPPPYSETDSQASR.E	1	1	6.86154	10.6083	10.8856	7.08317	3.8286	8.2527	6.36911	5.0539	12.988	15.4467	12.6224
1125	sp|Q9Y6I3-1|EPN1_HUMAN	EPN1	EPN1_HUMAN Isoform 2 of Epsin-1	128	KNIVHNYSEAEIK	30.8348	R	K.NIVHNY#SEAEIK.V	1	1	1.99872	1.75151	3.81139	21.8248	2.99242	6.33974	9.51107	16.6126	7.81287	9.31918	18.0257
1837	sp|P16144|ITB4_HUMAN	ITGB4	ITB4_HUMAN Integrin beta-4	1474	AYGTHLSPHVPHR	15.0073	R	R.M*TTTSAAAYGTHLS#PHVPHR.V	1	1	7.83344	8.6666	10.6261	12.477	10.5546	9.33996	8.80591	7.15567	7.27647	7.70284	9.56145
1851	sp|O43390-2|HNRPR_HUMAN	HNRNPR	HNRPR_HUMAN Isoform 2 of Heterogeneous nuclear ribonucleoprotein R	437	STAYEDYYYHPPP	30.8348	R	R.STAYEDY#YYHPPPR.M	1	1	8.89881	8.37224	10.4695	6.53076	8.03234	11.0933	10.4649	7.89546	10.6287	9.07759	8.53635
540	sp|P22626|ROA2_HUMAN	HNRNPA2B1	ROA2_HUMAN Heterogeneous nuclear ribonucleoproteins A2/B1	336	PYGGGNYGPGGSG	60.3582	R	R.NM*GGPYGGGNY#GPGGSGGSGGYGGR.S	2	1	9.02472	8.80076	7.29631	5.00475	14.94	8.24804	9.15297	7.18694	8.74949	10.1254	11.4706
1082	sp|Q99569|PKP4_HUMAN	PKP4	PKP4_HUMAN Plakophilin-4	372	QQQYDIYERMVPP	47.8083	R	R.TVHDMEQFGQQQYDIY#ER.M	1	1	9.61603	6.78939	11.5412	9.68269	9.14112	12.8625	9.68915	9.62909	7.3266	6.83693	6.88528
831	sp|P41567|EIF1_HUMAN	EIF1	EIF1_HUMAN Eukaryotic translation initiation factor 1	79	VIEHPEYGEVIQL	91.9001	R	K.FACNGTVIEHPEY#GEVIQLQGDQR.K	1	1	6.10065	6.57478	7.74177	8.72887	7.63167	11.8386	12.7404	14.9296	7.76237	7.47846	8.47277
488	sp|P62993|GRB2_HUMAN	GRB2	GRB2_HUMAN Growth factor receptor-bound protein 2	209	GMFPRNYVTPVNR	30.8348	R	R.NY#VTPVNR.N	1	1	1.59349	6.10028	8.43724	9.02943	1.94878	13.8801	10.1269	7.40762	17.3644	12.4813	11.6303
1190	sp|Q9UJ41|RABX5_HUMAN	RABGEF1	RABX5_HUMAN Rab5 GDP/GTP exchange factor	673	QDIVEKYPLEIKP	123.671	R	K.Y#PLEIKPPNQPLAAIDSENVENDK.L	2	2	3.35875	3.95551	5.75533	21.0722	3.78758	6.98552	8.11413	15.3546	7.6533	7.594	16.3691
2521	sp|Q9UHR4|BI2L1_HUMAN	BAIAP2L1	BI2L1_HUMAN Brain-specific angiogenesis inhibitor 1-associated protein 2-like protein 1	163	EHKEIEYVETVTS	53.5337	U	K.EIEY#VETVTSR.Q	1	1	6.79343	8.79659	8.92944	8.65127	7.78001	10.2432	10.7985	8.02807	10.3453	11.1934	8.44086
544	sp|P22626|ROA2_HUMAN	HNRNPA2B1	ROA2_HUMAN Heterogeneous nuclear ribonucleoproteins A2/B1	131	EHHLRDYFEEYGK	20.9846	R	K.EDTEEHHLRDY#FEEYGK.I	1	1	2.20821	3.83152	5.78244	11.9979	2.94977	10.9684	18.3021	20.7118	8.14785	7.13592	7.96405
2866	sp|P33552|CKS2_HUMAN	CKS2	CKS2_HUMAN Cyclin-dependent kinases regulatory subunit 2	17	KYFDEHYEYRHVM	17.0091	U	K.YFDEHY#EYR.H	1	1	7.38901	5.67634	8.50627	11.858	8.25403	12.1591	12.8589	11.3257	7.8511	5.78343	8.33811
2220	sp|Q5T2T1|MPP7_HUMAN	MPP7	MPP7_HUMAN MAGUK p55 subfamily member 7	417	ESDGVEYIFISKH	26.9265	R	R.SQESDGVEY#IFISK.H	1	1	6.0261	5.56131	5.30318	8.33111	8.86641	8.3305	10.2025	24.2592	8.05814	6.58635	8.47524
1491	sp|Q96C90|PP14B_HUMAN	PPP1R14B	PP14B_HUMAN Protein phosphatase 1 regulatory subunit 14B	29	GPGPRVYFQSPPG	17.2497	U	R.VY#FQSPPGAAGEGPGGADDEGPVRR.Q	1	1	7.63713	10.0526	8.41177	11.3091	7.34596	9.86573	10.7291	8.61549	8.41345	8.14508	9.47463
864	sp|Q9NUE0|ZDH18_HUMAN	ZDHHC18	ZDH18_HUMAN Palmitoyltransferase ZDHHC18	6	xMKDCEYQQISPG	47.0452	U	K.DCEY#QQISPGAAPLPASPGAR.R	1	1	9.56472	12.1167	12.5616	7.4337	7.91958	5.32115	7.34248	8.58809	9.70159	11.2382	8.21228
1718	sp|Q9H792|PEAK1_HUMAN	PEAK1	PEAK1_HUMAN Pseudopodium-enriched atypical kinase 1	531	KSSAIRYQEVWTS	65.4396	R	R.Y#QEVWTSSTSPR.Q	1	1	7.55378	5.6973	8.62027	7.30823	12.2863	13.0576	9.33933	11.1831	8.99975	8.68812	7.26625
2353	sp|Q15642|CIP4_HUMAN	TRIP10	CIP4_HUMAN Cdc42-interacting protein 4	590	KEGGEGYVPTSYL	24.2431	R	K.EGGEGY#VPTSYLR.V	1	1	6.21299	5.61617	8.52045	11.0518	7.97229	11.3903	14.1618	10.2785	7.7745	9.06486	7.95625
2025	sp|P67870|CSK2B_HUMAN	CSNK2B	CSK2B_HUMAN Casein kinase II subunit beta	209	AASNFKSPVKTIR	40.3622	R	K.IHPMAYQLQLQAASNFKS#PVK.T	1	1	9.28945	7.00935	8.99729	8.71365	15.9142	9.12237	11.539	10.868	6.60775	6.61427	5.32463
682	sp|P19174-2|PLCG1_HUMAN	PLCG1	PLCG1_HUMAN Isoform 2 of 1-phosphatidylinositol 4,5-bisphosphate phosphodiesterase gamma-1	1254	GSFESRYQQPFED	1000	R	R.Y#QQPFEDFR.I	1	1	2.49391	16.7629	10.0301	6.68952	1.77325	6.96379	5.20098	5.88675	10.8713	21.4932	11.8343
2022	sp|Q9C0B5|ZDHC5_HUMAN	ZDHHC5	ZDHC5_HUMAN Palmitoyltransferase ZDHHC5	630	PGPTAPYLGRSMS	37.5398	R	R.GVGSPEPGPTAPY#LGR.S	2	1	7.7285	8.36288	9.8927	9.56958	9.02973	9.32522	10.4626	8.9512	9.3472	8.44558	8.88476
1378	sp|Q86VI3|IQGA3_HUMAN	IQGAP3	IQGA3_HUMAN Ras GTPase-activating-like protein IQGAP3	1098	QRSHLPYDVTPEQ	25.1744	R	R.SHLPY#DVTPEQALSHPEVQR.R	1	1	7.11751	9.19009	8.30233	10.3931	8.50437	8.57031	9.3468	9.99795	9.92217	9.66529	8.99006
1119	sp|P01130|LDLR_HUMAN	LDLR	LDLR_HUMAN Low-density lipoprotein receptor	828	NFDNPVYQKTTED	26.0454	R	K.NINSINFDNPVY#QK.T	1	1	8.53029	8.93061	6.64109	7.94422	9.15054	10.5246	9.14251	8.33563	9.67228	10.8872	10.241
745	sp|Q9Y450|HBS1L_HUMAN	HBS1L	HBS1L_HUMAN HBS1-like protein	58	PVEEYDYEDLKES	31.2747	R	R.DKPSVEPVEEYDY#EDLK.E	1	1	6.8347	12.3282	10.0371	10.4338	6.73127	8.14901	8.09541	5.71336	10.1756	12.2601	9.24154
1195	sp|P48729-2|KC1A_HUMAN	CSNK1A1	KC1A_HUMAN Isoform 2 of Casein kinase I isoform alpha	322	LNHQYDYTFDWTM	17.0091	R	R.TLNHQYDY#TFDWTMLK.Q	1	1	5.74265	2.79425	5.48695	14.394	4.1326	6.47017	9.12567	29.1273	5.15902	4.60063	12.9668
2321	sp|Q5T0Z8|CF132_HUMAN	C6orf132	CF132_HUMAN Uncharacterized protein C6orf132	1142	APGSADYGFAPAA	73.3109	U	K.APGSADY#GFAPAAGR.S	1	1	8.99865	11.671	10.3473	8.72245	7.67377	8.87834	9.29027	7.99619	8.52425	9.60241	8.29534
1415	sp|Q9UQC2|GAB2_HUMAN	GAB2	GAB2_HUMAN GRB2-associated-binding protein 2	293	TDNEDVYTFKTPS	17.0091	R	K.GSLTGSETDNEDVY#TFK.T	1	1	8.27625	8.37132	9.46404	10.0492	11.8005	9.42831	7.34376	10.6256	7.58082	9.10017	7.95999
2367	tr|Q5JVM0|Q5JVM0_HUMAN	MYO6	Q5JVM0_HUMAN Unconventional myosin-VI (Fragment)	103	LRSLDSYPVTSKN	24.437	U	R.SLDSY#PVTSK.N	1	1	1.49942	3.08863	3.81765	3.91624	2.10445	4.90585	5.74136	5.25375	23.622	23.9171	22.1335
1011	sp|Q16644|MAPK3_HUMAN	MAPKAPK3	MAPK3_HUMAN MAP kinase-activated protein kinase 3	207	TPCYTPYYVAPEV	15.0073	R	K.ETTQNALQTPCYTPY#YVAPEVLGPEK.Y	1	1	4.6224	10.5744	11.8694	10.2529	4.55133	10.6518	6.3233	6.36471	8.78948	11.3104	14.6899
1257	sp|P35222|CTNB1_HUMAN	CTNNB1	CTNB1_HUMAN Catenin beta-1	142	VVNLINYQDDAEL	75.7382	R	K.HAVVNLINY#QDDAELATR.A	1	1	8.61684	9.78017	10.1871	11.5552	5.84066	8.62041	9.64006	6.46343	9.6981	9.92069	9.67732
1273	sp|Q70EL4|UBP43_HUMAN	USP43	UBP43_HUMAN Ubiquitin carboxyl-terminal hydrolase 43	835	SVELVEYLESRRR	20.1669	R	K.EKPPGASVELVEY#LESR.R	1	1	5.87701	7.49589	7.36217	9.32546	5.56525	8.56497	12.2135	7.75165	12.456	12.6062	10.7819
365	sp|P00533|EGFR_HUMAN	EGFR	EGFR_HUMAN Epidermal growth factor receptor	693	ELVEPLTPSGEAP	20.1669	R	R.ELVEPLT#PSGEAPNQALLR.I	1	1	7.49602	7.95307	10.8437	11.3685	6.15288	8.66507	13.3978	8.46766	7.89189	9.01994	8.74347
1520	sp|O43609|SPY1_HUMAN	SPRY1	SPY1_HUMAN Protein sprouty homolog 1	89	INVNNNYEHRHTS	110.838	R	R.THEIIPINVNNNY#EHR.H	1	1	8.36149	9.36856	6.73689	12.8319	8.80025	8.80149	9.08434	9.13779	11.1156	7.26958	8.49211
2762	sp|Q6IA17|SIGIR_HUMAN	SIGIRR	SIGIR_HUMAN Single Ig IL-1-related receptor	402	SARTDFYCLVSKD	53.5337	R	R.TDFY#CLVSK.D	1	1	6.96252	8.87464	6.86474	10.3143	8.4976	8.77615	7.49272	9.21745	10.881	11.7028	10.4162
1881	sp|Q9NUM4|T106B_HUMAN	TMEM106B	T106B_HUMAN Transmembrane protein 106B	50	DVSQFPYVEFTGR	44.2778	R	R.NGDVSQFPY#VEFTGR.D	1	1	6.6314	9.70924	13.2395	11.4844	7.71335	7.43458	8.10015	9.85126	8.96191	7.6194	9.25475
408	sp|P16885|PLCG2_HUMAN	PLCG2	PLCG2_HUMAN 1-phosphatidylinositol 4,5-bisphosphate phosphodiesterase gamma-2	1245	ENQLQLYQEKCNK	80.7549	U	K.EFSVNENQLQLY#QEK.C	1	1	6.0255	10.8189	9.35796	10.1803	7.0407	10.9357	8.76436	6.53581	8.88805	10.3382	11.1145
1118	sp|Q15365|PCBP1_HUMAN	PCBP1	PCBP1_HUMAN Poly(rC)-binding protein 1	211	AGYPHATHDLEGP	23.6238	U	R.CSDAAGYPHAT#HDLEGPPLDAYSIQGQHTISPLDLAK.L	1	1	8.39043	4.67471	7.99369	7.03901	6.58982	10.0347	9.43267	8.79166	9.96238	13.3368	13.7541
7	sp|O60716|CTND1_HUMAN	CTNND1	CTND1_HUMAN Catenin delta-1	174	SSVSNNYIQTLGR	55.37	R	R.TVQPVAM*GPDGLPVDASSVSNNY#IQTLGR.D	2	1	4.08206	10.0941	9.79248	6.98806	2.40167	6.57741	5.17253	4.40772	13.7707	21.1195	15.5938
1080	sp|Q96DM3|MIC1_HUMAN	C18orf8	MIC1_HUMAN Uncharacterized protein C18orf8	430	LDAEQSYAMAVEA	17.0091	R	K.YLDAEQSY#AMAVEAGQSR.S	1	1	7.34167	5.50699	6.95932	12.0006	6.74116	7.52347	9.81469	11.1376	10.3259	8.4581	14.1905
458	sp|Q08174-2|PCDH1_HUMAN	PCDH1	PCDH1_HUMAN Isoform 2 of Protocadherin-1	962	LNYPPGSPDLGRH	47.0452	R	R.IHLPLNYPPGS#PDLGR.H	1	1	7.84944	9.46116	6.38495	9.46245	10.4242	8.93396	6.82735	10.6934	11.0242	8.51514	10.4237
2107	sp|O14964|HGS_HUMAN	HGS	HGS_HUMAN Hepatocyte growth factor-regulated tyrosine kinase substrate	216	RVCEPCYEQLNRK	1000	R	R.VCEPCY#EQLNR.K	1	1	6.57867	5.94425	5.63459	16.8469	12.816	6.91843	9.46405	18.44	4.8678	4.79106	7.69828
2479	sp|O43768-4|ENSA_HUMAN	ENSA	ENSA_HUMAN Isoform 4 of Alpha-endosulfine	87	KSVEQKYFDSGDY	24.2431	R	K.Y#FDSGDYNMAK.A	1	1	5.85052	11.2981	8.03066	8.09104	4.54992	10.3267	9.26268	10.0633	9.52133	10.8388	12.1669
2157	sp|P52757|CHIO_HUMAN	CHN2	CHIO_HUMAN Beta-chimaerin	158	IYEHIGYATLLRE	20.1669	R	K.MTTNPIYEHIGY#ATLLR.E	1	1	7.09479	8.53359	6.27098	8.26671	9.07501	10.5344	8.96462	7.31109	11.6592	12.4841	9.80555
2054	sp|Q9H4M9|EHD1_HUMAN	EHD1	EHD1_HUMAN EH domain-containing protein 1	453	TYDEIFYTLSPVN	17.0091	U	K.DKPTYDEIFY#TLSPVNGK.I	1	1	4.04327	5.38934	4.97681	9.89386	2.54861	7.63807	11.7787	15.8824	13.1341	11.0254	13.6894
1268	sp|Q12846|STX4_HUMAN	STX4	STX4_HUMAN Syntaxin-4	251	ILSSADYVERGQE	53.5337	R	K.NILSSADY#VER.G	1	1	2.25636	5.82085	6.44552	7.78165	3.63193	13.7107	19.1555	15.8287	8.65482	8.81209	7.90182
2624	sp|P22059|OSBP1_HUMAN	OSBP	OSBP1_HUMAN Oxysterol-binding protein 1	764	TEDGTPYDPYKAL	13.3795	U	K.ATEDGTPY#DPYK.A	1	1	6.65603	5.03117	5.36165	9.04981	6.02625	7.35827	13.7394	20.2621	9.061	6.2136	11.2407
1961	sp|P78310|CXAR_HUMAN	CXADR	CXAR_HUMAN Coxsackievirus and adenovirus receptor	318	GYSKTQYNQVPSE	30.8348	R	K.TQY#NQVPSEDFER.T	1	1	5.91449	9.36562	9.22685	12.5277	4.93592	10.5458	8.37175	10.0518	9.48329	9.36373	10.213
2466	sp|Q9NRW7|VPS45_HUMAN	VPS45	VPS45_HUMAN Vacuolar protein sorting-associated protein 45	318	KAFVENYPQFKKM	1000	R	K.AFVENY#PQFK.K	1	1	3.87712	4.79587	5.83123	16.3214	3.39272	5.0654	7.89685	20.1457	7.32016	7.62897	17.7246
934	sp|A1X283|SPD2B_HUMAN	SH3PXD2B	SPD2B_HUMAN SH3 and PX domain-containing protein 2B	855	GLKDSLYVAVADF	48.8739	U	K.DSLY#VAVADFEGDK.D	1	1	1.72847	4.36389	7.72823	11.1354	2.77476	12.0526	16.1696	13.6515	10.7229	8.90774	10.7648
1498	sp|P61978-3|HNRPK_HUMAN	HNRNPK	HNRPK_HUMAN Isoform 3 of Heterogeneous nuclear ribonucleoprotein K	114	LEEYQHYKGSDFD	45.026	R	K.IIPTLEEYQHY#K.G	1	1	5.62391	7.16371	6.91995	11.8583	7.07142	10.6404	13.2459	12.7251	7.74935	6.87448	10.1273
537	sp|Q9H706|GAREM_HUMAN	GAREM	GAREM_HUMAN GRB2-associated and regulator of MAPK protein	453	GKSELPYEELWLE	28.9337	R	K.SELPY#EELWLEEGKPSHQPLTR.S	1	1	4.16598	9.95936	11.3586	9.22523	4.25949	11.49	11.3272	6.56377	10.814	10.8527	9.98368
2777	sp|Q8NI22|MCFD2_HUMAN	MCFD2	MCFD2_HUMAN Multiple coagulation factor deficiency protein 2	135	DKNNDGYIDYAEF	13.3795	R	K.NNDGY#IDYAEFAK.S	1	1	5.92641	13.1776	14.478	10.0243	4.76463	7.5071	6.28456	4.37893	9.34766	13.0475	11.0633
554	sp|P42685|FRK_HUMAN	FRK	FRK_HUMAN Tyrosine-protein kinase FRK	497	FETDSSYSDANNF	17.0091	R	K.LEDYFETDSSY#SDANNFIR.-	1	1	7.35388	11.2666	7.26941	11.2488	7.12269	10.2461	10.1229	8.14804	9.6978	8.34488	9.17889
906	sp|P40763|STAT3_HUMAN	STAT3	STAT3_HUMAN Signal transducer and activator of transcription 3	539	LGPGVNYSGCQIT	17.0091	R	K.LLGPGVNY#SGCQITWAK.F	1	1	1.74192	13.3078	8.91165	6.48155	1.41389	13.7843	11.9007	12.0502	9.6724	9.73831	10.9973
363	sp|P00533|EGFR_HUMAN	EGFR	EGFR_HUMAN Epidermal growth factor receptor	1069	DSFLQRYSSDPTG	23.6238	R	R.Y#SSDPTGALTEDSIDDTFLPVPEYINQSVPK.R	1	1	1.95846	14.8682	12.9761	9.43643	3.05293	10.7111	5.78451	4.90377	12.53	13.5054	10.273
1369	sp|O14828|SCAM3_HUMAN	SCAMP3	SCAM3_HUMAN Secretory carrier-associated membrane protein 3	35	HRPSRQYATLDVY	30.8348	U	R.QY#ATLDVYNPFETR.E	1	1	5.58082	8.30035	9.32089	9.90735	5.42085	9.52419	6.37435	6.13058	9.33464	16.4982	13.6078
672	sp|Q12774|ARHG5_HUMAN	ARHGEF5	ARHG5_HUMAN Rho guanine nucleotide exchange factor 5	656	RRSGRDYSTVSAS	24.437	U	R.DY#STVSASPTALSTLK.Q	1	1	2.47103	22.7109	14.0819	11.6174	3.78192	11.3468	4.83402	4.50278	6.36894	8.29973	9.98456
674	sp|Q12774|ARHG5_HUMAN	ARHGEF5	ARHG5_HUMAN Rho guanine nucleotide exchange factor 5	1100	QLLYQEYSDVVLN	17.0091	R	K.LINSSQLLYQEY#SDVVLNK.E	1	1	2.2737	14.3455	14.3071	15.7394	0.967158	6.68115	3.14789	2.84779	10.4464	17.0481	12.1957
2322	sp|O60447|EVI5_HUMAN	EVI5	EVI5_HUMAN Ecotropic viral integration site 5 protein homolog	692	KSDSNQYIGELKD	24.2431	R	K.SDSNQY#IGELK.D	1	1	4.11671	5.47119	8.0977	9.54689	4.27903	14.1573	12.0943	10.9612	12.8897	9.48912	8.89684
885	sp|P29597|TYK2_HUMAN	TYK2	TYK2_HUMAN Non-receptor tyrosine-protein kinase TYK2	1054	VPEGHEYYRVRED	17.0091	R	K.AVPEGHEY#YR.V	1	1	2.96348	11.2501	11.477	7.32578	3.21422	14.9079	14.3398	10.3772	10.6961	8.43652	5.01204
1986	sp|Q8TAA9|VANG1_HUMAN	VANGL1	VANG1_HUMAN Vang-like protein 1	312	MAGLKVYNVDGPS	71.7529	R	K.VY#NVDGPSNNATGQSR.A	1	1	5.98951	5.10428	1.96334	17.4057	5.47988	3.66612	3.7092	21.4922	6.15079	6.2174	22.8215
422	sp|Q9BQE3|TBA1C_HUMAN	TUBA1C	TBA1C_HUMAN Tubulin alpha-1C chain	282	ISAEKAYHEQLTV	13.2077	R	K.AY#HEQLTVAEITNACFEPANQMVK.C	1	1	3.05862	12.3739	13.0395	14.62	2.72516	12.1161	8.87429	7.97058	7.38549	8.65033	9.18602
1112	sp|Q13164|MK07_HUMAN	MAPK7	MK07_HUMAN Mitogen-activated protein kinase 7	221	QYFMTEYVATRWY	20.1669	R	R.GLCTSPAEHQYFMTEY#VATR.W	1	1	6.11146	8.06684	5.97619	11.6838	8.64876	7.60976	9.99863	12.0459	7.5749	8.94127	13.3424
366	sp|P00533|EGFR_HUMAN	EGFR	EGFR_HUMAN Epidermal growth factor receptor	1138	AVGNPEYLNTVQP	13.3795	R	R.DPHYQDPHSTAVGNPEY#LNTVQPTCVNSTFDSPAHWAQK.G	1	1	2.98176	10.7695	11.3537	7.10736	2.85967	10.8011	4.53152	7.61733	5.72523	18.4336	17.8192
1269	sp|Q12846|STX4_HUMAN	STX4	STX4_HUMAN Syntaxin-4	115	EEADENYNSVNTR	48.8739	R	K.EEADENY#NSVNTR.M	1	1	0.775719	9.13767	11.1797	6.06706	1.40012	14.559	12.5554	7.75127	14.0337	15.0539	7.48647
575	sp|Q9HBL0|TENS1_HUMAN	TNS1	TENS1_HUMAN Tensin-1	798	SYSPYDYQPCLAG	13.3795	R	R.SYSPYDY#QPCLAGPNQDFHSK.S	1	1	4.93767	6.14205	4.95842	5.15815	6.05343	9.06088	5.98959	3.7893	19.5678	18.3825	15.9602
12	sp|O60716|CTND1_HUMAN	CTNND1	CTND1_HUMAN Catenin delta-1	241	TRIEERYRPSMEG	15.0073	R	R.Y#RPSMEGYR.A	1	1	5.27298	7.72329	10.5931	8.32666	8.33671	8.81028	8.23582	4.955	11.1617	13.4053	13.1792
2143	sp|O95721|SNP29_HUMAN	SNAP29	SNP29_HUMAN Synaptosomal-associated protein 29	182	VPRGAGSAMSTDA	30.07	R	R.GAGS#AM*STDAYPK.N	1	1	4.10234	8.36921	10.5092	8.86603	6.28575	11.8009	11.2473	6.74276	11.6771	9.62558	10.7738
1723	sp|P26196|DDX6_HUMAN	DDX6	DDX6_HUMAN Probable ATP-dependent RNA helicase DDX6	473	SLYVAEYHSEPVE	44.2778	U	K.SLYVAEY#HSEPVEDEKP.-	1	1	1.63914	1.6366	3.04524	10.8332	1.86112	6.21599	10.5604	15.9828	11.6463	12.4755	24.1037
2603	sp|O00192|ARVC_HUMAN	ARVCF	ARVC_HUMAN Armadillo repeat protein deleted in velo-cardio-facial syndrome	259	RFQAEPYGLEDDT	15.0073	R	R.FQAEPY#GLEDDTR.S	1	1	4.34056	13.2726	11.0396	9.10018	5.8322	7.72944	9.74079	7.19505	11.4749	11.4743	8.80042
838	sp|P22681|CBL_HUMAN	CBL	CBL_HUMAN E3 ubiquitin-protein ligase CBL	141	EGKERMYEENSQP	44.2778	U	R.MY#EENSQPR.R	1	1	1.47957	3.0996	5.4109	13.7228	2.41606	8.43288	13.5047	19.3795	4.06294	3.57435	24.9167
2879	sp|Q9UKS6|PACN3_HUMAN	PACSIN3	PACN3_HUMAN Protein kinase C and casein kinase substrate in neurons protein 3	418	GLYPANYVECVGA	20.1669	U	R.IGLYPANY#VECVGA.-	1	1	3.63926	8.19582	7.87509	8.10312	1.32323	15.5301	14.566	12.7069	10.1836	9.6543	8.2225
715	sp|O75886|STAM2_HUMAN	STAM2	STAM2_HUMAN Signal transducing adapter molecule 2	192	TETKSLYPSSEIQ	48.8739	R	K.SLY#PSSEIQLNNK.V	1	1	1.2841	2.96395	2.81383	7.19381	3.46356	3.3558	5.00975	5.65548	16.864	14.5508	36.8449
939	sp|Q68CZ2|TENS3_HUMAN	TNS3	TENS3_HUMAN Tensin-3	855	VSPETPYVKTALR	26.9265	R	K.ESM*CSTPAFPVSPETPY#VK.T	1	1	2.61182	7.77547	8.33425	6.5508	1.86504	11.0093	9.77038	9.10533	16.6246	15.2521	11.1009
1980	sp|P46108|CRK_HUMAN	CRK	CRK_HUMAN Adapter molecule crk	136	RQEEAEYVRALFD	1000	R	R.QEEAEY#VR.A	1	1	0.311639	2.8463	6.23188	12.3733	0.785913	12.8272	18.9261	17.1816	9.95991	8.2404	10.3156
1989	sp|Q9UGK3-2|STAP2_HUMAN	STAP2	STAP2_HUMAN Isoform 2 of Signal-transducing adaptor protein 2	250	FLLDEDYEKVLGY	1000	R	K.ALVPFLLDEDY#EK.V	2	1	1.53893	7.61591	11.0177	9.15797	2.74237	16.377	14.9485	8.43893	10.4289	10.279	7.45474
460	sp|Q08174-2|PCDH1_HUMAN	PCDH1	PCDH1_HUMAN Isoform 2 of Protocadherin-1	1020	SEQYSDYSYRTNP	27.0548	R	K.HQVVQDLPPANTFVGTGDTTSTGSEQYSDY#SYR.T	1	1	2.15443	13.1823	8.98764	7.22004	4.34453	6.36806	4.81482	3.98983	13.3452	20.9898	14.6034
821	sp|Q9UM54-6|MYO6_HUMAN	MYO6	MYO6_HUMAN Isoform 6 of Unconventional myosin-VI	1146	PKSVTDYAQQNPA	48.8739	R	K.SVTDY#AQQNPAAQIPAR.Q	1	1	1.0676	6.87652	7.04114	5.45813	0.611884	5.37557	4.1724	5.244	18.5989	30.3171	15.2368
410	sp|P16885|PLCG2_HUMAN	PLCG2	PLCG2_HUMAN 1-phosphatidylinositol 4,5-bisphosphate phosphodiesterase gamma-2	763	RMYVDPSEINPSM	31.2747	U	R.MYVDPS#EINPSMPQR.T	1	1	0.878995	11.8451	11.1493	8.96359	2.68168	10.7143	11.1897	10.0699	11.4724	10.0237	11.0113
628	sp|Q8WXE0|CSKI2_HUMAN	CASKIN2	CSKI2_HUMAN Caskin-2	336	GTDRIGYFPPGIV	126.676	R	R.IGY#FPPGIVEVVSK.R	2	1	0.982075	5.66674	7.91438	4.97759	0	9.49449	10.3559	6.94231	21.1459	17.9847	14.5359
411	sp|P16885|PLCG2_HUMAN	PLCG2	PLCG2_HUMAN 1-phosphatidylinositol 4,5-bisphosphate phosphodiesterase gamma-2	818	GTRIQQYFPSNYV	18.6027	U	R.IQQY#FPSNYVEDISTADFEELEK.Q	1	1	0.69897	2.19291	1.00964	8.87719	0.36568	6.35813	16.2436	39.4151	7.03162	6.27537	11.5318
630	sp|P42566|EPS15_HUMAN	EPS15	EPS15_HUMAN Epidermal growth factor receptor substrate 15	849	FANFSAYPSEEDM	31.2747	R	K.EADPSNFANFSAY#PSEEDM*IEWAK.R	4	3	0.377478	1.47456	3.42279	7.02424	0.758366	3.04279	3.80706	3.1971	22.8707	25.2796	28.7453
1451	sp|Q9NZH5|PTTG2_HUMAN	PTTG2	PTTG2_HUMAN Securin-2	111	PASDDAYPEIEKF	59.2977	R	K.SSVPASDDAY#PEIEK.F	1	1	1.24112	9.84927	9.11857	10.9492	1.24824	7.42843	10.6575	9.41849	13.6942	11.1213	15.2737
317	sp|Q09666|AHNK_HUMAN	AHNAK	AHNK_HUMAN Neuroblast differentiation-associated protein AHNAK	61	IVGATIYFDNLQS	24.2431	R	K.EGDQIVGATIY#FDNLQSGEVTQLLNTMGHHTVGLK.L	1	1	0.590014	7.56781	6.74474	6.25851	0.656838	14.0674	9.68811	10.9366	14.6788	14.2453	14.5658
1	sp|P46109|CRKL_HUMAN	CRKL	CRKL_HUMAN Crk-like protein	207	PEPAHAYAQPQTT	15.3812	U	R.NSNSYGIPEPAHAY#AQPQTTTPLPAVSGS#PGAAITPLPSTQNGPVFAK.A	1	0	0	0	0	0	0	0	0	0	0	0	0
9	sp|O60716|CTND1_HUMAN	CTNND1	CTND1_HUMAN Catenin delta-1	193	NGGPGPYVGQAGT	42.8692	R	K.NGNGGPGPY#VGQAGTATLPR.N	1	0	0	0	0	0	0	0	0	0	0	0	0
10	sp|O60716|CTND1_HUMAN	CTNND1	CTND1_HUMAN Catenin delta-1	217	DGYSRHYEDGYPG	20.1669	R	R.HY#EDGYPGGSDNYGSLSR.V	1	0	0	0	0	0	0	0	0	0	0	0	0
11	sp|O60716|CTND1_HUMAN	CTNND1	CTND1_HUMAN Catenin delta-1	334	EVPSDQYYWAPLA	19.8431	R	R.SYEDMIGEEVPSDQY#YWAPLAQHER.G	1	0	0	0	0	0	0	0	0	0	0	0	0
275	sp|P68363|TBA1B_HUMAN	TUBA1B	TBA1B_HUMAN Tubulin alpha-1B chain	262	QTNLVPYPRIHFP	34.8923	R	R.FDGALNVDLTEFQTNLVPY#PR.I	1	0	0	0	0	0	0	0	0	0	0	0	0
347	sp|Q9BZI7|REN3B_HUMAN	UPF3B	REN3B_HUMAN Regulator of nonsense transcripts 3B	127	DNKGQEYPAIVEF	1000	R	K.GQEY#PAIVEFAPFQK.A	1	0	0	0	0	0	0	0	0	0	0	0	0
348	sp|Q9BZI7|REN3B_HUMAN	UPF3B	REN3B_HUMAN Regulator of nonsense transcripts 3B	79	PMPEHDYFEFFSN	27.1301	R	K.EQLQEHLQPM*PEHDY#FEFFSNDTSLYPHMYAR.A	2	0	0	0	0	0	0	0	0	0	0	0	0
355	sp|P00533|EGFR_HUMAN	EGFR	EGFR_HUMAN Epidermal growth factor receptor	764	EILDEAYVMASVD	99.2279	R	K.EILDEAY#VMASVDNPHVCR.L	1	0	0	0	0	0	0	0	0	0	0	0	0
356	sp|P00533|EGFR_HUMAN	EGFR	EGFR_HUMAN Epidermal growth factor receptor	1110	SVQNPVYHNQPLN	76.0346	R	K.RPAGSVQNPVY#HNQPLNPAPSR.D	7	0	0	0	0	0	0	0	0	0	0	0	0
357	sp|P00533|EGFR_HUMAN	EGFR	EGFR_HUMAN Epidermal growth factor receptor	1104	PKRPAGSVQNPVY	71.8061	R	K.RPAGS#VQNPVY#HNQPLNPAPSR.D	2	0	0	0	0	0	0	0	0	0	0	0	0
361	sp|P00533|EGFR_HUMAN	EGFR	EGFR_HUMAN Epidermal growth factor receptor	1190	NGIFKGSTAENAE	24.437	R	K.GS#TAENAEY#LR.V	1	0	0	0	0	0	0	0	0	0	0	0	0
418	sp|Q05655|KPCD_HUMAN	PRKCD	KPCD_HUMAN Protein kinase C delta type	304	ASRRSDSASSEPV	20.1669	R	R.RSDS#ASSEPVGIY#QGFEK.K	2	0	0	0	0	0	0	0	0	0	0	0	0
427	sp|Q5EBL8-2|PDZ11_HUMAN	PDZD11	PDZ11_HUMAN Isoform 2 of PDZ domain-containing protein 11	41	RIPYDDYPVVFLP	31.2747	R	R.IPYDDY#PVVFLPAYENPPAWIPPHER.V	2	0	0	0	0	0	0	0	0	0	0	0	0
429	sp|P63241-2|IF5A1_HUMAN	EIF5A	IF5A1_HUMAN Isoform 2 of Eukaryotic translation initiation factor 5A-1	128	IGIQDGYLSLLQD	59.2977	R	R.NDFQLIGIQDGY#LSLLQDSGEVR.E	4	0	0	0	0	0	0	0	0	0	0	0	0
433	sp|P21860|ERBB3_HUMAN	ERBB3	ERBB3_HUMAN Receptor tyrosine-protein kinase erbB-3	1289	PASEQGYEEMRAF	40.3622	R	R.DGGGPGGDYAAM*GACPASEQGY#EEM*R.A	5	0	0	0	0	0	0	0	0	0	0	0	0
434	sp|P21860|ERBB3_HUMAN	ERBB3	ERBB3_HUMAN Receptor tyrosine-protein kinase erbB-3	1328	AFDNPDYWHSRLF	31.2747	R	R.SLEATDSAFDNPDY#WHSR.L	1	0	0	0	0	0	0	0	0	0	0	0	0
457	sp|Q08174-2|PCDH1_HUMAN	PCDH1	PCDH1_HUMAN Isoform 2 of Protocadherin-1	1089	ALPEDHYERTTPD	1000	R	R.LGPLALPEDHY#ER.T	1	0	0	0	0	0	0	0	0	0	0	0	0
459	sp|Q08174-2|PCDH1_HUMAN	PCDH1	PCDH1_HUMAN Isoform 2 of Protocadherin-1	1017	STGSEQYSDYSYR	36.6555	R	K.HQVVQDLPPANTFVGTGDTTSTGSEQY#SDYSYR.T	1	0	0	0	0	0	0	0	0	0	0	0	0
473	sp|Q9Y490|TLN1_HUMAN	TLN1	TLN1_HUMAN Talin-1	1116	AQGNENYAGIAAR	149.41	R	K.AVSSAIAQLLGEVAQGNENY#AGIAAR.D	3	0	0	0	0	0	0	0	0	0	0	0	0
475	sp|Q9Y490|TLN1_HUMAN	TLN1	TLN1_HUMAN Talin-1	308	ARSLKTYGVSFFL	24.437	R	R.TY#GVSFFLVK.E	1	0	0	0	0	0	0	0	0	0	0	0	0
476	sp|Q9Y490|TLN1_HUMAN	TLN1	TLN1_HUMAN Talin-1	1777	SALQLLYTAKEAG	17.0091	R	K.TLAESALQLLY#TAK.E	1	0	0	0	0	0	0	0	0	0	0	0	0
519	sp|Q6ZVM7|TM1L2_HUMAN	TOM1L2	TM1L2_HUMAN TOM1-like protein 2	200	SPPPAPYSAPQAP	19.8431	R	R.TSAGSYSSPPPAPY#SAPQAPALSVTGPITANSEQIAR.L	1	0	0	0	0	0	0	0	0	0	0	0	0
522	sp|Q96RF0|SNX18_HUMAN	SNX18	SNX18_HUMAN Sorting nexin-18	274	EWQENPYPFQCTI	38.3708	R	K.LCVVLGPYGPEWQENPY#PFQCTIDDPTK.Q	2	0	0	0	0	0	0	0	0	0	0	0	0
527	sp|Q13480-2|GAB1_HUMAN	GAB1	GAB1_HUMAN Isoform 2 of GRB2-associated-binding protein 1	285	EADGELYVFNTPS	14.4608	R	K.VSPSSTEADGELY#VFNTPSGTSSVETQM*R.H	1	0	0	0	0	0	0	0	0	0	0	0	0
541	sp|P22626|ROA2_HUMAN	HNRNPA2B1	ROA2_HUMAN Heterogeneous nuclear ribonucleoproteins A2/B1	331	RNMGGPYGGGNYG	49.5899	R	R.NMGGPY#GGGNYGPGGSGGSGGYGGR.S	2	0	0	0	0	0	0	0	0	0	0	0	0
543	sp|P22626|ROA2_HUMAN	HNRNPA2B1	ROA2_HUMAN Heterogeneous nuclear ribonucleoproteins A2/B1	262	FGGSPGYGGGRGG	28.9337	R	R.GFGDGYNGYGGGPGGGNFGGSPGY#GGGR.G	1	0	0	0	0	0	0	0	0	0	0	0	0
560	sp|Q13263|TIF1B_HUMAN	TRIM28	TIF1B_HUMAN Transcription intermediary factor 1-beta	594	EGPRLASPSGSTS	30.8348	R	R.LAS#PSGSTSSGLEVVAPEGTSAPGGGPGTLDDSATICR.V	1	0	0	0	0	0	0	0	0	0	0	0	0
561	sp|Q13263|TIF1B_HUMAN	TRIM28	TIF1B_HUMAN Transcription intermediary factor 1-beta	50	ASAAASSPAGGGA	19.8431	R	R.STAPSAAASASASAAASS#PAGGGAEALELLEHCGVCR.E	1	0	0	0	0	0	0	0	0	0	0	0	0
566	sp|P60709|ACTB_HUMAN	ACTB	ACTB_HUMAN Actin, cytoplasmic 1	166	THTVPIYEGYALP	31.7689	R	R.TTGIVM*DSGDGVTHTVPIY#EGYALPHAILR.L	1	0	0	0	0	0	0	0	0	0	0	0	0
573	sp|Q8IZ07|AN13A_HUMAN	ANKRD13A	AN13A_HUMAN Ankyrin repeat domain-containing protein 13A	524	NTYDAQYERAIQE	61.2798	U	R.SQELSGPASNGGISQTNTYDAQY#ER.A	2	0	0	0	0	0	0	0	0	0	0	0	0
583	sp|P24666|PPAC_HUMAN	ACP1	PPAC_HUMAN Low molecular weight phosphotyrosine protein phosphatase	132	LIIEDPYYGNDSD	17.0091	R	K.QLIIEDPY#YGNDSDFETVYQQCVR.C	2	0	0	0	0	0	0	0	0	0	0	0	0
586	sp|P25787|PSA2_HUMAN	PSMA2	PSA2_HUMAN Proteasome subunit alpha type-2	101	QQYYLVYQEPIPT	36.5564	R	K.LAQQYYLVY#QEPIPTAQLVQR.V	1	0	0	0	0	0	0	0	0	0	0	0	0
592	sp|Q96DX4|RSPRY_HUMAN	RSPRY1	RSPRY_HUMAN RING finger and SPRY domain-containing protein 1	390	FLNHEGYGIGDDE	137.179	U	K.FLNHEGY#GIGDDEYSCAYDGCR.Q	2	0	0	0	0	0	0	0	0	0	0	0	0
642	sp|P21333|FLNA_HUMAN	FLNA	FLNA_HUMAN Filamin-A	1261	TSGVQCYGPGIEG	97.5963	R	K.LQVEPAVDTSGVQCY#GPGIEGQGVFR.E	1	0	0	0	0	0	0	0	0	0	0	0	0
675	sp|O15357|SHIP2_HUMAN	INPPL1	SHIP2_HUMAN Phosphatidylinositol 3,4,5-trisphosphate 5-phosphatase 2	1003	LPPEPPSPARAPV	93.8392	R	K.NSFNNPAY#YVLEGVPHQLLPPEPPS#PAR.A	5	0	0	0	0	0	0	0	0	0	0	0	0
676	sp|O15357|SHIP2_HUMAN	INPPL1	SHIP2_HUMAN Phosphatidylinositol 3,4,5-trisphosphate 5-phosphatase 2	1135	TLSEVDYAPAGPA	31.2747	R	K.TLSEVDY#APAGPAR.S	1	0	0	0	0	0	0	0	0	0	0	0	0
677	sp|O15357|SHIP2_HUMAN	INPPL1	SHIP2_HUMAN Phosphatidylinositol 3,4,5-trisphosphate 5-phosphatase 2	986	SFNNPAYYVLEGV	19.8431	R	K.NSFNNPAY#YVLEGVPHQLLPPEPPSPAR.A	3	0	0	0	0	0	0	0	0	0	0	0	0
698	sp|P07900-2|HS90A_HUMAN	HSP90AA1	HS90A_HUMAN Isoform 2 of Heat shock protein HSP 90-alpha	726	CIVTSTYGWTANM	17.0091	R	R.LVTSPCCIVTSTY#GWTANMER.I	1	0	0	0	0	0	0	0	0	0	0	0	0
703	sp|Q8TE68|ES8L1_HUMAN	EPS8L1	ES8L1_HUMAN Epidermal growth factor receptor kinase substrate 8-like protein 1	526	PAGQEGYVPYNIL	57.7111	R	K.VRDPAGQEGY#VPYNILTPYPGPR.L	1	0	0	0	0	0	0	0	0	0	0	0	0
725	sp|Q2M2I8|AAK1_HUMAN	AAK1	AAK1_HUMAN AP2-associated protein kinase 1	34	SGLGSGYIGRVFG	24.2431	R	R.EQGGSGLGSGSSGGGGSTSGLGSGY#IGR.V	1	0	0	0	0	0	0	0	0	0	0	0	0
754	sp|Q16539|MK14_HUMAN	MAPK14	MK14_HUMAN Mitogen-activated protein kinase 14	180	HTDDEMTGYVATR	60.3582	R	R.HTDDEM*T#GY#VATR.W	5	0	0	0	0	0	0	0	0	0	0	0	0
765	sp|Q16181|SEPT7_HUMAN	42985	SEPT7_HUMAN Septin-7	30	QKNLEGYVGFANL	249.025	R	K.NLEGY#VGFANLPNQVYR.K	2	0	0	0	0	0	0	0	0	0	0	0	0
778	sp|Q8N3R9|MPP5_HUMAN	MPP5	MPP5_HUMAN MAGUK p55 subfamily member 5	363	DPSDDPYVPCREL	71.0667	R	K.AHFDYDPSDDPY#VPCR.E	1	0	0	0	0	0	0	0	0	0	0	0	0
786	sp|Q92692|PVRL2_HUMAN	PVRL2	PVRL2_HUMAN Poliovirus receptor-related protein 2	518	IYDALSYSSPSDS	30.8348	U	K.INPIYDALSY#SSPSDSYQGK.G	1	0	0	0	0	0	0	0	0	0	0	0	0
787	sp|O00560|SDCB1_HUMAN	SDCBP	SDCB1_HUMAN Syntenin-1	46	PHDGNLYPRLYPE	46.1286	R	K.VIQAQTAFSANPANPAILSEASAPIPHDGNLY#PR.L	1	0	0	0	0	0	0	0	0	0	0	0	0
788	sp|O00560|SDCB1_HUMAN	SDCBP	SDCB1_HUMAN Syntenin-1	50	NLYPRLYPELSQY	19.8465	R	R.LY#PELSQYM*GLSLNEEEIR.A	1	0	0	0	0	0	0	0	0	0	0	0	0
801	sp|Q00610|CLH1_HUMAN	CLTC	CLH1_HUMAN Clathrin heavy chain 1	1206	QVGDRCYDEKMYD	1000	R	R.LAELEEFINGPNNAHIQQVGDRCY#DEK.M	1	0	0	0	0	0	0	0	0	0	0	0	0
802	sp|Q00610|CLH1_HUMAN	CLTC	CLH1_HUMAN Clathrin heavy chain 1	1477	FITEEDYQALRTS	84.6094	R	K.SVNESLNNLFITEEDY#QALR.T	1	0	0	0	0	0	0	0	0	0	0	0	0
808	sp|Q8IY67-2|RAVR1_HUMAN	RAVER1	RAVR1_HUMAN Isoform 2 of Ribonucleoprotein PTB-binding 1	463	PPAAQLTPPPAPV	1000	R	R.EALGLGPPAAQLT#PPPAPVGLR.G	1	0	0	0	0	0	0	0	0	0	0	0	0
809	sp|Q8IY67-2|RAVR1_HUMAN	RAVER1	RAVR1_HUMAN Isoform 2 of Ribonucleoprotein PTB-binding 1	588	DSYSFDYPSDMGP	45.026	R	R.LPPEPGLSDSYSFDY#PSDM*GPR.R	1	0	0	0	0	0	0	0	0	0	0	0	0
810	sp|Q8IY67-2|RAVR1_HUMAN	RAVER1	RAVR1_HUMAN Isoform 2 of Ribonucleoprotein PTB-binding 1	509	RIPLNPYLNLHSL	30.6121	R	R.IPLNPY#LNLHSLLPASNLAGK.E	1	0	0	0	0	0	0	0	0	0	0	0	0
824	sp|Q16625|OCLN_HUMAN	OCLN	OCLN_HUMAN Occludin	315	PSPPSDYVERVDS	17.0091	R	K.NVSAGTQDVPSPPSDY#VER.V	1	0	0	0	0	0	0	0	0	0	0	0	0
839	sp|Q9Y2W1|TR150_HUMAN	THRAP3	TR150_HUMAN Thyroid hormone receptor-associated protein 3	320	KSPVGKSPPSTGS	18.8054	U	K.S#PPSTGSTYGSSQK.E	1	0	0	0	0	0	0	0	0	0	0	0	0
842	sp|P12236|ADT3_HUMAN	SLC25A6	ADT3_HUMAN ADP/ATP translocase 3	195	AAYFGVYDTAKGM	17.0091	R	R.AAYFGVY#DTAK.G	1	0	0	0	0	0	0	0	0	0	0	0	0
843	sp|P12236|ADT3_HUMAN	SLC25A6	ADT3_HUMAN ADP/ATP translocase 3	112	HTQFWRYFAGNLA	15.3812	R	R.Y#FAGNLASGGAAGATSLCFVYPLDFAR.T	1	0	0	0	0	0	0	0	0	0	0	0	0
857	sp|P51991|ROA3_HUMAN	HNRNPA3	ROA3_HUMAN Heterogeneous nuclear ribonucleoprotein A3	360	RSSGSPYGGGYGS	30.8348	R	R.SSGSPY#GGGYGSGGGSGGYGSR.R	1	0	0	0	0	0	0	0	0	0	0	0	0
858	sp|P51991|ROA3_HUMAN	HNRNPA3	ROA3_HUMAN Heterogeneous nuclear ribonucleoprotein A3	373	GGGSGGYGSRRFx	15.0073	R	R.SSGSPYGGGYGSGGGSGGY#GSR.R	1	0	0	0	0	0	0	0	0	0	0	0	0
866	sp|Q96NC0|ZMAT2_HUMAN	ZMAT2	ZMAT2_HUMAN Zinc finger matrin-type protein 2	80	QSEMGGYYCNVCD	30.8348	R	K.TTPQSEMGGY#YCNVCDCVVK.D	1	0	0	0	0	0	0	0	0	0	0	0	0
868	sp|Q07912|ACK1_HUMAN	TNK2	ACK1_HUMAN Activated CDC42 kinase 1	827	FASDPKYATPQVI	48.8739	R	K.Y#ATPQVIQAPGPR.A	1	0	0	0	0	0	0	0	0	0	0	0	0
875	sp|Q92796|DLG3_HUMAN	DLG3	DLG3_HUMAN Disks large homolog 3	702	QFNDNLYGTSIQS	20.1669	R	K.FIEAGQFNDNLY#GTSIQSVR.A	1	0	0	0	0	0	0	0	0	0	0	0	0
903	sp|P40763|STAT3_HUMAN	STAT3	STAT3_HUMAN Signal transducer and activator of transcription 3	45	ESQDWAYAASKES	49.5899	R	R.QFLAPWIESQDWAY#AASK.E	1	0	0	0	0	0	0	0	0	0	0	0	0
924	sp|Q8TF42|UBS3B_HUMAN	UBASH3B	UBS3B_HUMAN Ubiquitin-associated and SH3 domain-containing protein B	352	VLERRPYEDQGLG	46.1286	U	R.RPY#EDQGLGETTPLTIICQPM*QPLR.V	1	0	0	0	0	0	0	0	0	0	0	0	0
936	sp|A1X283|SPD2B_HUMAN	SH3PXD2B	SPD2B_HUMAN SH3 and PX domain-containing protein 2B	157	PMVLEQYVVVANY	19.6069	R	K.SGGDQTSVDPM*VLEQY#VVVANYQK.Q	1	0	0	0	0	0	0	0	0	0	0	0	0
970	sp|Q6S5L8|SHC4_HUMAN	SHC4	SHC4_HUMAN SHC-transforming protein 4	465	LFDDPCYINTQAL	57.7111	R	R.VDLFDDPCY#INTQALQSTPGSAGNQR.S	1	0	0	0	0	0	0	0	0	0	0	0	0
995	sp|P14618-2|KPYM_HUMAN	PKM	KPYM_HUMAN Isoform M1 of Pyruvate kinase PKM	370	ETAKGDYPLEAVR	1000	R	K.GDY#PLEAVR.M	1	0	0	0	0	0	0	0	0	0	0	0	0
1009	sp|Q9UJM3|ERRFI_HUMAN	ERRFI1	ERRFI_HUMAN ERBB receptor feedback inhibitor 1	395	VSSTHYYLLPERP	27.1205	U	K.VSSTHY#Y#LLPERPPYLDK.Y	1	0	0	0	0	0	0	0	0	0	0	0	0
1019	sp|Q14247|SRC8_HUMAN	CTTN	SRC8_HUMAN Src substrate cortactin	289	AAVGFDYKEKLAK	78.1557	U	R.QDSAAVGFDY#K.E	1	0	0	0	0	0	0	0	0	0	0	0	0
1064	sp|O60547|GMDS_HUMAN	GMDS	GMDS_HUMAN GDP-mannose 4,6 dehydratase	231	RSVAKIYLGQLEC	26.0454	R	K.IY#LGQLECFSLGNLDAK.R	1	0	0	0	0	0	0	0	0	0	0	0	0
1075	sp|Q8ND56-2|LS14A_HUMAN	LSM14A	LS14A_HUMAN Isoform 2 of Protein LSM14 homolog A	192	LDPLRKSPTMEQA	14.966	R	K.S#PTMEQAVQTASAHLPAPAAVGR.R	2	0	0	0	0	0	0	0	0	0	0	0	0
1136	sp|O75821|EIF3G_HUMAN	EIF3G	EIF3G_HUMAN Eukaryotic translation initiation factor 3 subunit G	42	LATGDTSPEPELL	17.0091	R	K.GIPLATGDTS#PEPELLPGAPLPPPK.E	1	0	0	0	0	0	0	0	0	0	0	0	0
1141	sp|Q5VWQ8|DAB2P_HUMAN	DAB2IP	DAB2P_HUMAN Disabled homolog 2-interacting protein	833	SFQNPVYQMAAGL	16.9639	R	R.AGQTPTTPGTSEGAPGRPQLLAPLSFQNPVY#QMAAGLPLSPR.G	1	0	0	0	0	0	0	0	0	0	0	0	0
1150	sp|P27361|MK03_HUMAN	MAPK3	MK03_HUMAN Mitogen-activated protein kinase 3	202	DHTGFLTEYVATR	27.1205	R	R.IADPEHDHTGFLT#EY#VATR.W	1	0	0	0	0	0	0	0	0	0	0	0	0
1162	sp|Q99959|PKP2_HUMAN	PKP2	PKP2_HUMAN Plakophilin-2	597	RGTIADYQPDDKA	97.7479	R	R.GTIADY#QPDDK.A	1	0	0	0	0	0	0	0	0	0	0	0	0
1164	sp|Q99959|PKP2_HUMAN	PKP2	PKP2_HUMAN Plakophilin-2	86	TSSVPEYVYNLHL	20.1669	R	R.TSSVPEY#VYNLHLVENDFVGGR.S	1	0	0	0	0	0	0	0	0	0	0	0	0
1263	sp|Q8N5J2-3|FA63A_HUMAN	FAM63A	FA63A_HUMAN Isoform 3 of Protein FAM63A	472	QLQQEEYQQQQAA	45.653	R	R.GPLGLTDLELAQQLQQEEY#QQQQAAQPVR.M	1	0	0	0	0	0	0	0	0	0	0	0	0
1290	sp|P17174|AATC_HUMAN	GOT1	AATC_HUMAN Aspartate aminotransferase, cytoplasmic	71	NSLNHEYLPILGL	60.3582	R	K.IANDNSLNHEY#LPILGLAEFR.S	1	0	0	0	0	0	0	0	0	0	0	0	0
1293	sp|P13797|PLST_HUMAN	PLS3	PLST_HUMAN Plastin-3	35	NGFICDYELHELF	30.6867	R	K.VDLNSNGFICDY#ELHELFK.E	1	0	0	0	0	0	0	0	0	0	0	0	0
1320	sp|Q86X29|LSR_HUMAN	LSR	LSR_HUMAN Lipolysis-stimulated lipoprotein receptor	616	EEEEAYYPPAPPP	30.8348	R	K.EEEEEAYY#PPAPPPYSETDSQASR.E	1	0	0	0	0	0	0	0	0	0	0	0	0
1364	sp|Q9BZL6|KPCD2_HUMAN	PRKD2	KPCD2_HUMAN Serine/threonine-protein kinase D2	710	EKSFRRSVVGTPA	14.0618	R	R.S#VVGTPAYLAPEVLLNQGYNR.S	1	0	0	0	0	0	0	0	0	0	0	0	0
1368	sp|O14828|SCAM3_HUMAN	SCAMP3	SCAM3_HUMAN Secretory carrier-associated membrane protein 3	53	REPPPAYEPPAPA	102.531	U	R.EPPPAY#EPPAPAPLPPPSAPSLQPSR.K	1	0	0	0	0	0	0	0	0	0	0	0	0
1397	sp|Q8IYB3|SRRM1_HUMAN	SRRM1	SRRM1_HUMAN Serine/arginine repetitive matrix protein 1	406	RPSPPATPPPKTR	1000	R	R.HRPS#PPAT#PPPK.T	1	0	0	0	0	0	0	0	0	0	0	0	0
1416	sp|Q9UQC2|GAB2_HUMAN	GAB2	GAB2_HUMAN GRB2-associated-binding protein 2	324	ATPLSAYQIPRTF	13.3795	R	R.EFGDLLVDNM*DVPATPLSAY#QIPR.T	1	0	0	0	0	0	0	0	0	0	0	0	0
1444	sp|P15941-2|MUC1_HUMAN	MUC1	MUC1_HUMAN Isoform 2 of Mucin-1	1252	GGSSLSYTNPAVA	24.437	R	K.VSAGNGGSSLSY#TNPAVAATSANL.-	1	0	0	0	0	0	0	0	0	0	0	0	0
1486	sp|Q9NY33|DPP3_HUMAN	DPP3	DPP3_HUMAN Dipeptidyl peptidase 3	417	NVLAVAYATQREK	20.1669	R	K.NVSLGNVLAVAY#ATQR.E	1	0	0	0	0	0	0	0	0	0	0	0	0
1496	sp|P61978-2|HNRPK_HUMAN	HNRNPK	HNRPK_HUMAN Isoform 2 of Heterogeneous nuclear ribonucleoprotein K	449	QIQNAQYLLQNSV	34.7683	R	R.IITITGTQDQIQNAQY#LLQNSVK.Q	1	0	0	0	0	0	0	0	0	0	0	0	0
1509	sp|Q15283|RASA2_HUMAN	RASA2	RASA2_HUMAN Ras GTPase-activating protein 2	226	QFNEIFYFEVTRS	82.3868	R	K.TSNPQFNEIFY#FEVTR.S	2	0	0	0	0	0	0	0	0	0	0	0	0
1512	sp|P55072|TERA_HUMAN	VCP	TERA_HUMAN Transitional endoplasmic reticulum ATPase	644	RLDQLIYIPLPDE	1000	U	R.LDQLIY#IPLPDEK.S	1	0	0	0	0	0	0	0	0	0	0	0	0
1513	sp|P55072|TERA_HUMAN	VCP	TERA_HUMAN Transitional endoplasmic reticulum ATPase	173	ETDPSPYCIVAPD	13.3795	R	K.VVETDPSPY#CIVAPDTVIHCEGEPIK.R	1	0	0	0	0	0	0	0	0	0	0	0	0
1522	sp|Q86V48|LUZP1_HUMAN	LUZP1	LUZP1_HUMAN Leucine zipper protein 1	799	TSSITIYPSDSSS	17.0091	R	K.VTSSITIY#PSDSSSPR.A	1	0	0	0	0	0	0	0	0	0	0	0	0
1525	sp|Q14980|NUMA1_HUMAN	NUMA1	NUMA1_HUMAN Nuclear mitotic apparatus protein 1	1225	EAERKNSLISSLE	33.6572	R	R.KNS#LISSLEEEVSILNR.Q	1	0	0	0	0	0	0	0	0	0	0	0	0
1526	sp|Q14980|NUMA1_HUMAN	NUMA1	NUMA1_HUMAN Nuclear mitotic apparatus protein 1	1774	ESLESLYFTPIPA	31.2747	R	K.VESLESLY#FTPIPAR.S	1	0	0	0	0	0	0	0	0	0	0	0	0
1533	sp|P50395|GDIB_HUMAN	GDI2	GDIB_HUMAN Rab GDP dissociation inhibitor beta	229	PYLYPLYGLGELP	33.6572	R	K.SPYLYPLY#GLGELPQGFAR.L	1	0	0	0	0	0	0	0	0	0	0	0	0
1563	sp|O00459|P85B_HUMAN	PIK3R2	P85B_HUMAN Phosphatidylinositol 3-kinase regulatory subunit beta	577	RKIRDQYLVWLTQ	84.3587	U	K.IRDQY#LVWLTQK.G	1	0	0	0	0	0	0	0	0	0	0	0	0
1572	sp|Q9UER7|DAXX_HUMAN	DAXX	DAXX_HUMAN Death domain-associated protein 6	671	TLPSPPSPLASLA	15.0073	R	K.ICTLPSPPS#PLASLAPVADSSTR.V	1	0	0	0	0	0	0	0	0	0	0	0	0
1591	sp|Q15262-3|PTPRK_HUMAN	PTPRK	PTPRK_HUMAN Isoform 3 of Receptor-type tyrosine-protein phosphatase kappa	859	EGTESPYQTGQLH	20.1669	R	R.YLCEGTESPY#QTGQLHPAIR.V	1	0	0	0	0	0	0	0	0	0	0	0	0
1678	sp|Q7L5N7|PCAT2_HUMAN	LPCAT2	PCAT2_HUMAN Lysophosphatidylcholine acyltransferase 2	34	MVPRQASFFPPPV	56.9556	U	R.QAS#FFPPPVPNPFVQQTQIGSAR.R	2	0	0	0	0	0	0	0	0	0	0	0	0
1679	sp|Q969M3-3|YIPF5_HUMAN	YIPF5	YIPF5_HUMAN Isoform 3 of Protein YIPF5	42	SKQYAGYDYSQQG	17.0091	R	K.QYAGY#DYSQQGR.F	1	0	0	0	0	0	0	0	0	0	0	0	0
1687	sp|P43490|NAMPT_HUMAN	NAMPT	NAMPT_HUMAN Nicotinamide phosphoribosyltransferase	453	KGDLEEYGQDLLH	86.8328	R	K.GDLEEY#GQDLLHTVFK.N	3	0	0	0	0	0	0	0	0	0	0	0	0
1740	sp|Q13813-2|SPTN1_HUMAN	SPTAN1	SPTN1_HUMAN Isoform 2 of Spectrin alpha chain, non-erythrocytic 1	1413	AHGHYASPEIKQK	13.3795	R	R.AGTFQAFEQFGQQLLAHGHYAS#PEIK.Q	1	0	0	0	0	0	0	0	0	0	0	0	0
1750	sp|P33981|TTK_HUMAN	TTK	TTK_HUMAN Dual specificity protein kinase TTK	811	TTEEMKYVLGQLV	40.1539	R	K.Y#VLGQLVGLNSPNSILK.A	1	0	0	0	0	0	0	0	0	0	0	0	0
1755	sp|P08107|HSP71_HUMAN	HSPA1A	HSP71_HUMAN Heat shock 70 kDa protein 1A/1B	611	PIISGLYQGAGGP	38.1888	R	K.ELEQVCNPIISGLY#QGAGGPGPGGFGAQGPK.G	1	0	0	0	0	0	0	0	0	0	0	0	0
1767	sp|O15446-2|RPA34_HUMAN	CD3EAP	RPA34_HUMAN Isoform 2 of DNA-directed RNA polymerase I subunit RPA34	138	LQPIPASPPPQIP	16.1979	R	R.ILEGPQQSLSGSPLQPIPAS#PPPQIPPGLRPR.F	1	0	0	0	0	0	0	0	0	0	0	0	0
1803	sp|Q96KP1|EXOC2_HUMAN	EXOC2	EXOC2_HUMAN Exocyst complex component 2	113	WVDEMNYYDMRTD	17.0091	R	K.IGILDQSAVWVDEMNY#YDM*R.T	1	0	0	0	0	0	0	0	0	0	0	0	0
1824	sp|Q76N89|HECW1_HUMAN	HECW1	HECW1_HUMAN E3 ubiquitin-protein ligase HECW1	1292	GEEGLDYSGPSRE	17.0091	R	K.LYVTFVGEEGLDY#SGPSR.E	2	0	0	0	0	0	0	0	0	0	0	0	0
1831	sp|Q9BZ29-4|DOCK9_HUMAN	DOCK9	DOCK9_HUMAN Isoform 4 of Dedicator of cytokinesis protein 9	340	SRVKLFYLDPDAQ	1000	R	K.LFY#LDPDAQK.L	2	0	0	0	0	0	0	0	0	0	0	0	0
1844	sp|O94832|MYO1D_HUMAN	MYO1D	MYO1D_HUMAN Unconventional myosin-Id	612	CRHQVEYLGLLEN	1000	R	R.HQVEY#LGLLENVR.V	1	0	0	0	0	0	0	0	0	0	0	0	0
1869	sp|Q15012|LAP4A_HUMAN	LAPTM4A	LAP4A_HUMAN Lysosomal-associated transmembrane protein 4A	210	FEAPPQYVLPTYE	19.8465	U	R.NVPEIAVYPAFEAPPQY#VLPTYEM*AVK.M	1	0	0	0	0	0	0	0	0	0	0	0	0
1870	sp|Q9Y2K6|UBP20_HUMAN	USP20	UBP20_HUMAN Ubiquitin carboxyl-terminal hydrolase 20	227	NPMFRGYAQQDTQ	65.4396	U	R.GY#AQQDTQEFLR.C	1	0	0	0	0	0	0	0	0	0	0	0	0
1885	sp|P16949-2|STMN1_HUMAN	STMN1	STMN1_HUMAN Isoform 2 of Stathmin	25	AFELILSPRSKES	80.7549	R	R.ASGQAFELILS#PR.S	1	0	0	0	0	0	0	0	0	0	0	0	0
1902	sp|P35367|HRH1_HUMAN	HRH1	HRH1_HUMAN Histamine H1 receptor	301	REVDKLYCFPLDI	135.018	U	K.LY#CFPLDIVHMQAAAEGSSR.D	1	0	0	0	0	0	0	0	0	0	0	0	0
1915	sp|Q00526|CDK3_HUMAN	CDK3	CDK3_HUMAN Cyclin-dependent kinase 3	14	EKIGEGTYGVVYK	97.5963	R	K.IGEGT#Y#GVVYK.A	16	0	0	0	0	0	0	0	0	0	0	0	0
1955	sp|P04075-2|ALDOA_HUMAN	ALDOA	ALDOA_HUMAN Isoform 2 of Fructose-bisphosphate aldolase A	414	SESLFVSNHAYxx	36.5564	R	K.YTPSGQAGAAASESLFVS#NHAY.-	1	0	0	0	0	0	0	0	0	0	0	0	0
1977	sp|Q5T5Y3-3|CAMP1_HUMAN	CAMSAP1	CAMP1_HUMAN Isoform 3 of Calmodulin-regulated spectrin-associated protein 1	69	PFYVDQYEQEHIK	35.7774	R	R.DNIPEDLRDPFYVDQY#EQEHIKPPVIK.L	1	0	0	0	0	0	0	0	0	0	0	0	0
2082	sp|Q9Y316-3|MEMO1_HUMAN	MEMO1	MEMO1_HUMAN Isoform 3 of Protein MEMO1	213	ESQGEIYRSIEHL	51.0043	R	R.YSYYDESQGEIY#R.S	1	0	0	0	0	0	0	0	0	0	0	0	0
2085	sp|P21709|EPHA1_HUMAN	EPHA1	EPHA1_HUMAN Ephrin type-A receptor 1	599	KLWLKPYVDLQAY	76.0346	U	K.LWLKPY#VDLQAYEDPAQGALDFTR.E	1	0	0	0	0	0	0	0	0	0	0	0	0
2086	sp|Q8WUA4|TF3C2_HUMAN	GTF3C2	TF3C2_HUMAN General transcription factor 3C polypeptide 2	892	NAMFQPSSPTRRP	17.0091	R	R.AHFNAMFQPS#SPTR.R	1	0	0	0	0	0	0	0	0	0	0	0	0
2103	sp|Q676U5|A16L1_HUMAN	ATG16L1	A16L1_HUMAN Autophagy-related protein 16-1	269	AATKRLSQPAGGL	43.6045	R	K.RLS#QPAGGLLDSITNIFGR.R	1	0	0	0	0	0	0	0	0	0	0	0	0
2136	sp|Q9H4L4|SENP3_HUMAN	SENP3	SENP3_HUMAN Sentrin-specific protease 3	169	HPKNHLSPQQGGA	37.549	R	K.NHLS#PQQGGATPQVPSPCCR.F	1	0	0	0	0	0	0	0	0	0	0	0	0
2138	sp|O15145|ARPC3_HUMAN	ARPC3	ARPC3_HUMAN Actin-related protein 2/3 complex subunit 3	47	IVDEAIYYFKANV	17.0091	R	K.DTDIVDEAIY#YFK.A	1	0	0	0	0	0	0	0	0	0	0	0	0
2151	sp|Q9BUP0|EFHD1_HUMAN	EFHD1	EFHD1_HUMAN EF-hand domain-containing protein D1	81	CRVFNPYTEFPEF	48.8739	R	R.VFNPY#TEFPEFSR.R	1	0	0	0	0	0	0	0	0	0	0	0	0
2184	sp|P62805|H4_HUMAN	HIST1H4A	H4_HUMAN Histone H4	89	TAMDVVYALKRQG	104.477	U	K.TVTAMDVVY#ALK.R	2	0	0	0	0	0	0	0	0	0	0	0	0
2203	sp|Q969W9|PMEPA_HUMAN	PMEPA1	PMEPA_HUMAN Transmembrane prostate androgen-induced protein	219	GISATCYGSGGRM	17.0091	R	R.LGGPCPPSSNSGISATCY#GSGGR.M	1	0	0	0	0	0	0	0	0	0	0	0	0
2217	sp|O43639|NCK2_HUMAN	NCK2	NCK2_HUMAN Cytoplasmic protein NCK2	99	PSTDAEYPANGSG	39.6629	R	R.DASPTPSTDAEY#PANGSGADR.I	1	0	0	0	0	0	0	0	0	0	0	0	0
2226	sp|O15344|TRI18_HUMAN	MID1	TRI18_HUMAN E3 ubiquitin-protein ligase Midline-1	378	LLECLDYLTAPNP	44.2778	R	K.LLECLDY#LTAPNPPTIR.E	1	0	0	0	0	0	0	0	0	0	0	0	0
2270	sp|P54753|EPHB3_HUMAN	EPHB3	EPHB3_HUMAN Ephrin type-B receptor 3	608	APGMKVYIDPFTY	34.0887	R	K.VY#IDPFTYEDPNEAVR.E	1	0	0	0	0	0	0	0	0	0	0	0	0
2282	sp|P41227|NAA10_HUMAN	NAA10	NAA10_HUMAN N-alpha-acetyltransferase 10	137	SEVEPKYYADGED	24.437	R	K.Y#YADGEDAYAM*K.R	1	0	0	0	0	0	0	0	0	0	0	0	0
2331	sp|P51610-4|HCFC1_HUMAN	HCFC1	HCFC1_HUMAN Isoform 4 of Host cell factor 1	411	TAATATSPTPNPV	20.1669	R	K.YDIPATAATATS#PTPNPVPSVPANPPK.S	1	0	0	0	0	0	0	0	0	0	0	0	0
2358	sp|Q9HC35|EMAL4_HUMAN	EML4	EMAL4_HUMAN Echinoderm microtubule-associated protein-like 4	226	INQEGEYIKMFMR	1000	R	K.DVIINQEGEY#IK.M	2	0	0	0	0	0	0	0	0	0	0	0	0
2364	sp|P54136|SYRC_HUMAN	RARS	SYRC_HUMAN Arginine--tRNA ligase, cytoplasmic	536	TAAYLLYAFTRIR	42.8692	R	R.GNTAAYLLY#AFTR.I	1	0	0	0	0	0	0	0	0	0	0	0	0
2368	sp|Q96B36-3|AKTS1_HUMAN	AKT1S1	AKTS1_HUMAN Isoform 3 of Proline-rich AKT1 substrate 1	203	TQQYAKSLPVSVP	31.2747	R	K.S#LPVSVPVWGFK.E	1	0	0	0	0	0	0	0	0	0	0	0	0
2371	sp|Q86T03-2|TM55B_HUMAN	TMEM55B	TM55B_HUMAN Isoform 2 of Type 1 phosphatidylinositol 4,5-bisphosphate 4-phosphatase	169	VHPGPLSPEPQPM	1000	R	R.IINLGPVHPGPLS#PEPQPMGVR.V	1	0	0	0	0	0	0	0	0	0	0	0	0
2400	sp|P29323|EPHB2_HUMAN	EPHB2	EPHB2_HUMAN Ephrin type-B receptor 2	596	TPGMKIYIDPFTY	22.4917	R	K.IY#IDPFTYEDPNEAVR.E	1	0	0	0	0	0	0	0	0	0	0	0	0
2422	sp|Q14644|RASA3_HUMAN	RASA3	RASA3_HUMAN Ras GTPase-activating protein 3	66	FYGEDFYCEIPRS	60.3582	R	K.SLCPFYGEDFY#CEIPR.S	1	0	0	0	0	0	0	0	0	0	0	0	0
2423	sp|Q14644|RASA3_HUMAN	RASA3	RASA3_HUMAN Ras GTPase-activating protein 3	199	QFDEVFYFEVTRP	15.5899	R	K.TNNPQFDEVFY#FEVTRPCSYSK.K	1	0	0	0	0	0	0	0	0	0	0	0	0
2449	sp|Q9Y6M4-2|KC1G3_HUMAN	CSNK1G3	KC1G3_HUMAN Isoform 2 of Casein kinase I isoform gamma-3	65	LGKNLYTNEYVAI	13.3795	R	K.NLYT#NEYVAIK.L	1	0	0	0	0	0	0	0	0	0	0	0	0
2461	sp|Q8WUM0|NU133_HUMAN	NUP133	NU133_HUMAN Nuclear pore complex protein Nup133	50	SSPVLFSPVGRRS	49.5899	R	K.GLPLGSAVSSPVLFS#PVGR.R	1	0	0	0	0	0	0	0	0	0	0	0	0
2487	sp|O60292|SI1L3_HUMAN	SIPA1L3	SI1L3_HUMAN Signal-induced proliferation-associated 1-like protein 3	1411	MGSRVGYPAQVYK	65.4396	R	R.VGY#PAQVYK.T	1	0	0	0	0	0	0	0	0	0	0	0	0
2491	sp|Q99729-2|ROAA_HUMAN	HNRNPAB	ROAA_HUMAN Isoform 2 of Heterogeneous nuclear ribonucleoprotein A/B	235	AQPKEVYQQQQYG	38.1888	R	K.EVY#QQQQYGSGGR.G	1	0	0	0	0	0	0	0	0	0	0	0	0
2518	sp|P46781|RS9_HUMAN	RPS9	RS9_HUMAN 40S ribosomal protein S9	96	GKMKLDYILGLKI	1000	R	K.LDY#ILGLK.I	1	0	0	0	0	0	0	0	0	0	0	0	0
2524	sp|P52735|VAV2_HUMAN	VAV2	VAV2_HUMAN Guanine nucleotide exchange factor VAV2	142	ENDDDVYRSLEEL	50.7033	R	K.GIRPFPSEETTENDDDVY#R.S	1	0	0	0	0	0	0	0	0	0	0	0	0
2541	sp|Q9C0C2|TB182_HUMAN	TNKS1BP1	TB182_HUMAN 182 kDa tankyrase-1-binding protein	1545	QTSRRPSQGPPAR	1000	U	R.RPS#QGPPAR.S	1	0	0	0	0	0	0	0	0	0	0	0	0
2542	sp|Q9C0C2|TB182_HUMAN	TNKS1BP1	TB182_HUMAN 182 kDa tankyrase-1-binding protein	1652	NLFPGLSPSALKA	31.2747	U	K.VNLFPGLS#PSALK.A	1	0	0	0	0	0	0	0	0	0	0	0	0
2575	sp|Q92600|RCD1_HUMAN	RQCD1	RCD1_HUMAN Cell differentiation protein RCD1 homolog	23	VDREKIYQWINEL	65.2463	R	K.IY#QWINELSSPETR.E	1	0	0	0	0	0	0	0	0	0	0	0	0
2596	sp|P31350-2|RIR2_HUMAN	RRM2	RIR2_HUMAN Isoform 2 of Ribonucleoside-diphosphate reductase subunit M2	80	PQQLQLSPLKGLS	49.4182	R	R.VPLAPITDPQQLQLS#PLK.G	1	0	0	0	0	0	0	0	0	0	0	0	0
2607	sp|Q5T1M5|FKB15_HUMAN	FKBP15	FKB15_HUMAN FK506-binding protein 15	960	RPSQEQSASASSG	18.8054	R	R.RPSQEQS#ASASSGQPQAPLNR.E	1	0	0	0	0	0	0	0	0	0	0	0	0
2617	sp|P47813|IF1AX_HUMAN	EIF1AX	IF1AX_HUMAN Eukaryotic translation initiation factor 1A, X-chromosomal	106	ARSLKAYGELPEH	1000	R	K.AY#GELPEHAK.I	1	0	0	0	0	0	0	0	0	0	0	0	0
2721	sp|Q9ULE0|WWC3_HUMAN	WWC3	WWC3_HUMAN Protein WWC3	57	ELAQEEYQQLHKM	1000	R	R.FELAQEEY#QQLHK.M	1	0	0	0	0	0	0	0	0	0	0	0	0
2761	sp|Q14258|TRI25_HUMAN	TRIM25	TRI25_HUMAN E3 ubiquitin/ISG15 ligase TRIM25	278	SKFDTIYQILLKK	17.0091	U	K.FDTIY#QILLK.K	1	0	0	0	0	0	0	0	0	0	0	0	0
2768	sp|O75830|SPI2_HUMAN	SERPINI2	SPI2_HUMAN Serpin I2	184	VLVNAIYFKGDWK	1000	R	R.LVLVNAIY#FK.G	1	0	0	0	0	0	0	0	0	0	0	0	0
2785	sp|Q8NFH8|REPS2_HUMAN	REPS2	REPS2_HUMAN RalBP1-associated Eps domain-containing protein 2	212	VPLSHGYSKLRSS	17.0091	R	R.VPLSHGY#SK.L	1	0	0	0	0	0	0	0	0	0	0	0	0
2792	sp|Q15056|IF4H_HUMAN	EIF4H	IF4H_HUMAN Eukaryotic translation initiation factor 4H	86	KFKGFCYVEFDEV	58.4333	R	K.GFCY#VEFDEVDSLK.E	1	0	0	0	0	0	0	0	0	0	0	0	0
2819	sp|P12830|CADH1_HUMAN	CDH1	CADH1_HUMAN Cadherin-1	876	KKLADMYGGGEDD	1000	R	K.LADM*Y#GGGEDD.-	1	0	0	0	0	0	0	0	0	0	0	0	0
2847	sp|Q15942|ZYX_HUMAN	ZYX	ZYX_HUMAN Zyxin	344	NQNQVRSPGAPGP	47.0452	R	R.S#PGAPGPLTLK.E	1	0	0	0	0	0	0	0	0	0	0	0	0
2872	sp|Q6NZY4|ZCHC8_HUMAN	ZCCHC8	ZCHC8_HUMAN Zinc finger CCHC domain-containing protein 8	479	PPLPRGTPPPVFT	18.9783	R	R.GT#PPPVFTPPLPK.G	1	0	0	0	0	0	0	0	0	0	0	0	0
2882	sp|O95238|SPDEF_HUMAN	SPDEF	SPDEF_HUMAN SAM pointed domain-containing Ets transcription factor	329	ISQRLVYQFVHPI	1000	R	R.LVY#QFVHPI.-	1	0	0	0	0	0	0	0	0	0	0	0	0
2884	sp|Q5VV41|ARHGG_HUMAN	ARHGEF16	ARHGG_HUMAN Rho guanine nucleotide exchange factor 16	107	TPARHQSFGAAVL	38.7758	U	R.HQS#FGAAVLSR.E	1	0	0	0	0	0	0	0	0	0	0	0	0
