# Supplementary material for: Time-resolved phosphoproteomics reveals scaffolding and catalysis-responsive patterns of SHP2-dependent signaling
Source: eLife journal article supplement (doi:10.7554/elife.64251), 2021-03-23
Supplement: supp [file elife-64251-supp-v1.zip › elife_poa_e64251_Supplementary_file_2.xlsx]

## Sheet: Metrics
Site Seer:	Localized only, > 13
Site Quant:	Quant method for TMT SignaltoNoise Ratios
	0.5 min isolation specificity
	200 min. summed ion abundance required across all TMT chanenls for a peptide to be used for quant
Site Quant:	Quantified peptides:		1621	(majority have a Y# with 1468)
	Quantified sites:		748 localized AND quantified (no contams or reverse sequences)
			636 are phosphorylated Tyr
126 (-0')
127n (-5')
127c (-10')
128n (-30')
128c (+0')
129n (+5')
129c (+10')
130n (+30')
130c (WO+5')
131n (WO+10')
131c (WO+30')

## Sheet: Site Quant Data_NoContams
Site ID	Protein ID	Gene symbol	Protein description	Site Position	Motif	Max Score	Redundancy	Peptide sequence	Y# ONLY	spectral_counts	Sum SN per channel	100408	161568	115597	112572	70074	95804.5	90800.7	108783	258667	245599	217707	1.57758e+06	Normalized											Normalized Sum	Normalized and Scaled per Site
											num_quant	126	127n	127c	128n	128c	129n	129c	130n	130c	131n	131c	SumAcrossAll	126	127n	127c	128n	128c	129n	129c	130n	130c	131n	131c		126	127n	127c	128n	128c	129n	129c	130n	130c	131n	131c
383	sp|P00533|EGFR_HUMAN	EGFR	EGFR_HUMAN Epidermal growth factor receptor	1197	TAENAEYLRVAPQ	146.622	R	K.GSTAENAEY#LR.V	1	103	95	3321.03	8230.53	5333.95	5129.88	1943.68	4506.8	3845.74	4363.51	18023.9	16276.9	18678.8	89654.7	8555.46	13176.9	11935.5	11787.4	7174.79	12168.1	10955.5	10375.6	18023.9	17142.9	22193.1	143489	5.96244	9.18317	8.31807	8.21482	5.00023	8.48017	7.63506	7.23095	12.5611	11.9472	15.4667
602	sp|Q9H5V8|CDCP1_HUMAN	CDCP1	CDCP1_HUMAN CUB domain-containing protein 1	707	GPAVGIYNDNINT	154.095	R	K.GPAVGIY#NDNINTEM*PR.Q	1	17	13	2515.66	1182.61	752.663	997.134	1407.08	579.713	621.245	705.633	1476.29	1460.64	2045.05	13743.7	6480.7	1893.33	1684.2	2291.2	5194	1565.19	1769.76	1677.87	1476.29	1538.36	2429.82	28000.7	23.1448	6.76171	6.01484	8.18265	18.5495	5.58983	6.32041	5.99223	5.27233	5.494	8.6777
677	sp|Q05655|KPCD_HUMAN	PRKCD	KPCD_HUMAN Protein kinase C delta type	313	SEPVGIYQGFEKK	154.095	R	R.RSDSASSEPVGIY#QGFEK.K	1	18	12	2315.21	1253.7	664.244	900.106	1326.84	661.173	600.392	800.479	1134.74	1209.43	1521.75	12388.1	5964.32	2007.14	1486.35	2068.25	4897.83	1785.13	1710.36	1903.39	1134.74	1273.78	1808.06	26039.3	22.905	7.70809	5.70808	7.94279	18.8094	6.85551	6.56835	7.30969	4.35777	4.89176	6.94357
2107	sp|P49840|GSK3A_HUMAN	GSK3A	GSK3A_HUMAN Glycogen synthase kinase-3 alpha	279	GEPNVSYICSRYY	30.8348	R	R.GEPNVSY#ICSR.Y	1	17	12	1992.51	1749.85	1181.51	1421	1797.22	1107.16	1052.37	1194.55	2020.83	1503.73	1563.2	16583.9	5133	2801.46	2643.81	3265.15	6634.17	2989.26	2997.93	2840.42	2020.83	1583.74	1857.3	34767.1	14.764	8.05779	7.60435	9.3915	19.0818	8.59797	8.6229	8.16985	5.81248	4.55528	5.34213
3715	sp|P29966|MARCS_HUMAN	MARCKS	MARCS_HUMAN Myristoylated alanine-rich C-kinase substrate	170	FKLSGFSFKKNKK	24.2431	U	K.LSGFS#FKK.N	0	1	1	1752.49	669.269	473.525	376.994	507.549	356.725	281.86	322.774	2811.1	2485.25	1670.06	11707.6	4514.67	1071.48	1059.58	866.252	1873.54	963.138	802.944	767.499	2811.1	2617.48	1984.28	19332	23.3534	5.54254	5.481	4.48093	9.69139	4.9821	4.15345	3.97011	14.5412	13.5397	10.2642
2554	sp|Q05397|FAK1_HUMAN	PTK2	FAK1_HUMAN Focal adhesion kinase 1	570	DFGLSRYMEDSTY	97.7479	R	R.Y#MEDSTYYK.A	1	4	4	1371.91	1098.03	1006.94	1135.47	1162.66	805.078	843.011	918.573	1219.49	1073.11	897.449	11531.7	3534.24	1757.91	2253.17	2609.07	4291.78	2173.66	2401.51	2184.2	1219.49	1130.21	1066.3	24621.6	14.3543	7.13972	9.15123	10.5967	17.431	8.8283	9.7537	8.87109	4.95294	4.59031	4.33075
1866	sp|P29597|TYK2_HUMAN	TYK2	TYK2_HUMAN Non-receptor tyrosine-protein kinase TYK2	292	AEGEPCYIRDSGV	1000	R	R.LLAQAEGEPCY#IR.D	1	5	5	1363.1	1109.87	883.592	890.538	1035.91	727.119	644.977	648.897	1412.26	1198.78	965.316	10880.4	3511.55	1776.88	1977.17	2046.27	3823.91	1963.18	1837.37	1542.96	1412.26	1262.57	1146.94	22301.1	15.7461	7.96769	8.86582	9.17565	17.1468	8.80308	8.23893	6.91878	6.33269	5.66148	5.14296
345	sp|Q13523|PRP4B_HUMAN	PRPF4B	PRP4B_HUMAN Serine/threonine-protein kinase PRP4 homolog	849	DNDITPYLVSRFY	34.0728	R	K.LCDFGSASHVADNDITPY#LVSR.F	1	35	31	1346.1	2560.06	1816.91	2902.05	2108.52	2447.19	2192.2	2948.68	1696.11	1801.23	2270.02	24089.1	3467.76	4098.6	4065.62	6668.29	7783.26	6607.27	6245	7011.44	1696.11	1897.07	2697.11	52237.5	6.63844	7.84607	7.78295	12.7653	14.8997	12.6485	11.955	13.4222	3.24693	3.63162	5.16317
2294	sp|O15264|MK13_HUMAN	MAPK13	MK13_HUMAN Mitogen-activated protein kinase 13	182	DAEMTGYVVTRWY	35.7774	R	R.HADAEMTGY#VVTR.W	1	9	9	1301.86	593.529	449.953	317.397	628.463	286.385	250.795	229.602	628.419	461.064	375.085	5522.55	3353.78	950.225	1006.84	729.311	2319.87	773.222	714.447	545.952	628.419	485.597	445.655	11953.3	28.0573	7.94947	8.42308	6.10133	19.4078	6.46869	5.97698	4.56737	5.25728	4.06245	3.72829
1399	sp|P15529-2|MCP_HUMAN	CD46	MCP_HUMAN Isoform B of Membrane cofactor protein	384	ADGGAEYATYQTK	59.2977	R	K.ADGGAEY#ATYQTK.S	1	3	3	1167.25	317.046	132.066	198.842	275.633	71.9432	68.0799	103	354.523	493.969	695.506	3877.86	3007.02	507.582	295.517	456.897	1017.45	194.243	193.941	244.915	354.523	520.252	826.361	7618.7	39.4689	6.66232	3.87884	5.99705	13.3547	2.54955	2.5456	3.21465	4.65332	6.82862	10.8465
2209	sp|Q00526|CDK3_HUMAN	CDK3	CDK3_HUMAN Cyclin-dependent kinase 3	15	KIGEGTYGVVYKA	150.768	R	K.IGEGT#Y#GVVYK.A	1	34	4	1167.17	1088.25	995.31	951.336	1059.21	847.747	1000.56	981.793	1371.39	1274.05	814.737	11551.5	3006.79	1742.25	2227.16	2185.97	3909.89	2288.87	2850.34	2334.53	1371.39	1341.84	968.026	24227.1	12.4109	7.19136	9.19285	9.02283	16.1385	9.44757	11.7651	9.63603	5.66059	5.53861	3.99564
3067	sp|Q13627|DYR1A_HUMAN	DYRK1A	DYR1A_HUMAN Dual specificity tyrosine-phosphorylation-regulated kinase 1A	321	GQRIYQYIQSRFY	73.3109	R	R.IYQY#IQSR.F	1	13	12	1149.46	1230.35	1114.86	1053.24	1061.69	1031.8	1042.41	1133.07	1738.23	1419.88	1362.28	13337.3	2961.19	1969.76	2494.66	2420.13	3919.06	2785.79	2969.55	2694.24	1738.23	1495.43	1618.58	27066.6	10.9404	7.27746	9.21675	8.94138	14.4793	10.2924	10.9713	9.95411	6.42204	5.52498	5.98
893	sp|P07947|YES_HUMAN	YES1	YES_HUMAN Tyrosine-protein kinase Yes	426	LIEDNEYTARQGA	24.437	R	R.LIEDNEY#TAR.Q	1	5	5	1120.78	418.607	185.126	329.46	516.631	127.052	107.13	134.653	806.953	687.929	1057.59	5491.91	2887.3	670.179	414.247	757.029	1907.06	343.034	305.185	320.181	806.953	724.533	1256.57	10392.3	27.7832	6.44882	3.98611	7.28454	18.3508	3.30086	2.93665	3.08095	7.76494	6.97184	12.0914
380	sp|P00533|EGFR_HUMAN	EGFR	EGFR_HUMAN Epidermal growth factor receptor	869	GAEEKEYHAEGGK	1000	R	K.EY#HAEGGKVPIK.W	1	3	3	1117.05	473.919	221.743	301.201	532.554	178.302	151.039	188.151	801.972	1027.54	1229.38	6222.85	2877.68	758.732	496.184	692.096	1965.84	481.405	430.271	447.39	801.972	1082.21	1460.68	11494.5	25.0354	6.60085	4.31672	6.02113	17.1025	4.18815	3.74329	3.89222	6.97703	9.41507	12.7077
2187	sp|P54764|EPHA4_HUMAN	EPHA4	EPHA4_HUMAN Ephrin type-A receptor 4	779	DDPEAAYTTRGGK	30.8348	R	R.VLEDDPEAAY#TTR.G	1	3	3	883.373	426.062	209.568	252.584	429.121	106.094	93.023	104.332	454.447	469.246	534.788	3962.64	2275.7	682.114	468.94	580.383	1584.03	286.447	264.998	248.083	454.447	494.214	635.405	7974.76	28.5362	8.55342	5.88031	7.27775	19.863	3.59193	3.32296	3.11086	5.69856	6.19723	7.9677
1448	sp|P28482|MK01_HUMAN	MAPK1	MK01_HUMAN Mitogen-activated protein kinase 1	187	TGFLTEYVATRWY	31.2747	R	R.VADPDHDHTGFLTEY#VATR.W	1	10	10	849.55	2159.51	1479.39	974.862	637.341	602.256	563.287	593.322	2354.07	1931.95	1284.25	13429.8	2188.56	3457.31	3310.37	2240.03	2352.64	1626.06	1604.65	1410.81	2354.07	2034.75	1525.87	24105.1	9.07924	14.3426	13.7331	9.29273	9.75993	6.74569	6.6569	5.85275	9.76584	8.44115	6.33008
1071	sp|O95297|MPZL1_HUMAN	MPZL1	MPZL1_HUMAN Myelin protein zero-like protein 1	263	KSESVVYADIRKN	146.622	R	K.SESVVY#ADIR.K	1	6	6	846.938	1192	802.862	716.332	269.189	351.683	289.322	313.699	1251.29	1205.96	1160.67	8399.95	2181.84	1908.35	1796.53	1645.98	993.667	949.525	824.2	745.92	1251.29	1270.13	1379.05	14946.5	14.5977	12.7679	12.0197	11.0125	6.64817	6.35283	5.51434	4.99061	8.37182	8.49787	9.22656
1519	sp|Q86YV5|SG223_HUMAN	SGK223	SG223_HUMAN Tyrosine-protein kinase SgK223	411	TQPEPIYAESTKR	71.7529	U	R.EATQPEPIY#AESTK.R	1	3	3	799.098	356.276	240.013	230.964	390.445	173.175	140.953	147.998	860.786	662.149	552.219	4554.08	2058.59	570.389	537.067	530.705	1441.27	467.564	401.539	351.912	860.786	697.381	656.116	8573.32	24.0116	6.65307	6.2644	6.1902	16.8111	5.45371	4.68358	4.10474	10.0403	8.13432	7.653
861	sp|Q06124|PTN11_HUMAN	PTPN11	PTN11_HUMAN Tyrosine-protein phosphatase non-receptor type 11	584	EDSARVYENVGLM	1000	R	R.VY#ENVGLM*QQQK.S	1	9	9	710.503	1784.25	935.705	679.968	264.129	362.516	378.618	364.66	3502.95	3016.21	1900.39	13899.9	1830.36	2856.53	2093.78	1562.42	974.991	978.774	1078.58	867.095	3502.95	3176.7	2257.93	21180.1	8.64188	13.4869	9.8856	7.37683	4.60333	4.62119	5.09243	4.09391	16.5389	14.9985	10.6606
780	sp|P18433|PTPRA_HUMAN	PTPRA	PTPRA_HUMAN Receptor-type tyrosine-protein phosphatase alpha	798	IDAFSDYANFKxx	44.2778	R	K.VVQEYIDAFSDY#ANFK.-	1	5	4	687.125	966.503	771.503	582.287	727.287	782.844	758.204	670.071	779.813	713.207	545.091	7983.93	1770.13	1547.35	1726.35	1337.97	2684.66	2113.63	2159.92	1593.31	779.813	751.156	647.647	17112	10.3444	9.04248	10.0886	7.81893	15.6888	12.3518	12.6223	9.31108	4.55713	4.38966	3.78476
1582	sp|Q9NYB9|ABI2_HUMAN	ABI2	ABI2_HUMAN Abl interactor 2	183	PTQKPPSPPMSGK	30.6121	R	R.TTPPTQKPPS#PPMSGK.G	0	3	3	685.248	624.355	721.36	558.208	812.51	734.05	808.265	717.084	679.624	616.87	394.314	7351.89	1765.3	999.577	1614.15	1282.64	2999.25	1981.89	2302.53	1705.1	679.624	649.693	468.502	16448.3	10.7324	6.0771	9.81352	7.79805	18.2344	12.0493	13.9986	10.3664	4.13189	3.94992	2.84834
3758	sp|P35251|RFC1_HUMAN	RFC1	RFC1_HUMAN Replication factor C subunit 1	156	TKNKPLSPIKLTP	1000	R	K.NKPLS#PIK.L	0	1	1	680.441	583.516	773.975	676.026	516.5	540.118	637.762	657.293	702.288	609.416	443.109	6820.44	1752.92	934.193	1731.89	1553.36	1906.58	1458.29	1816.81	1562.92	702.288	641.842	526.478	14587.6	12.0165	6.40404	11.8723	10.6485	13.0699	9.99678	12.4545	10.7141	4.81429	4.39993	3.60909
521	sp|P16885|PLCG2_HUMAN	PLCG2	PLCG2_HUMAN 1-phosphatidylinositol 4,5-bisphosphate phosphodiesterase gamma-2	759	YDVSRMYVDPSEI	76.7327	U	R.MY#VDPSEINPSMPQR.T	1	21	18	638.881	1520.53	1114.68	993.915	502.745	1002.39	949.773	1031.71	2057.87	2042.77	2088.63	13943.9	1645.85	2434.33	2494.27	2283.8	1855.8	2706.39	2705.65	2453.23	2057.87	2151.46	2481.6	25270.3	6.513	9.63318	9.87039	9.03752	7.34382	10.7098	10.7069	9.70798	8.14346	8.5138	9.82022
792	sp|P05023|AT1A1_HUMAN	ATP1A1	AT1A1_HUMAN Sodium/potassium-transporting ATPase subunit alpha-1	10	GVGRDKYEPAAVS	146.622	R	K.Y#EPAAVSEQGDK.K	1	7	7	626.832	2004.67	1282.48	1031.73	456.739	1025.47	747.642	997.474	2124.15	2156.64	1681.5	14135.3	1614.81	3209.43	2869.74	2370.71	1685.98	2768.71	2129.83	2371.81	2124.15	2271.39	1997.87	25414.4	6.35391	12.6284	11.2918	9.32819	6.63394	10.8943	8.3804	9.33255	8.35804	8.93741	7.86115
384	sp|P00533|EGFR_HUMAN	EGFR	EGFR_HUMAN Epidermal growth factor receptor	1110	SVQNPVYHNQPLN	114.498	R	K.RPAGS#VQNPVY#HNQPLNPAPSR.D	1	25	17	623.036	910.729	739.877	559.833	398.748	575.096	564.652	553.009	1447.7	1129.44	985.387	8487.51	1605.03	1458.05	1655.59	1286.38	1471.92	1552.73	1608.54	1314.95	1447.7	1189.54	1170.78	15761.2	10.1834	9.2509	10.5042	8.16166	9.33885	9.85158	10.2057	8.34298	9.18518	7.54727	7.42825
1007	sp|Q09666|AHNK_HUMAN	AHNAK	AHNK_HUMAN Neuroblast differentiation-associated protein AHNAK	836	PNVKGEYDVTMPK	73.3109	U	K.GEY#DVTMPK.V	1	11	11	612.361	5279.92	2324.05	1745.95	465.112	1706.08	1321.24	1521.28	7729.69	6771	4880.15	34356.8	1577.53	8453.01	5200.42	4011.83	1716.89	4606.33	3763.85	3617.34	7729.69	7131.27	5798.32	53606.5	2.9428	15.7686	9.7011	7.48385	3.20276	8.59286	7.02126	6.74794	14.4193	13.303	10.8165
2098	sp|Q7Z5L9|I2BP2_HUMAN	IRF2BP2	I2BP2_HUMAN Interferon regulatory factor 2-binding protein 2	360	ARKRKPSPEPEGE	1000	R	K.RKPS#PEPEGEVGPPK.I	0	2	2	563.925	557.439	577.67	548.095	545.366	568.566	592.216	578.36	488.114	458.857	397.432	5876.04	1452.75	892.445	1292.62	1259.41	2013.13	1535.1	1687.06	1375.24	488.114	483.272	472.207	12951.4	11.217	6.89075	9.98062	9.72413	15.5438	11.8528	13.0262	10.6185	3.76883	3.73144	3.64601
3000	sp|Q13428-4|TCOF_HUMAN	TCOF1	TCOF_HUMAN Isoform 4 of Treacle protein	906	LAPAKESPRKGAA	1000	R	R.AALAPAKES#PRK.G	0	1	1	558.868	544.509	530.382	414.125	437.003	511.344	490.235	437.625	612.254	503.672	330.733	5370.75	1439.73	871.744	1186.81	951.572	1613.13	1380.6	1396.55	1040.59	612.254	530.472	392.959	11416.4	12.611	7.63589	10.3957	8.33513	14.1299	12.0931	12.2328	9.1149	5.36293	4.64658	3.44205
1418	sp|Q92796|DLG3_HUMAN	DLG3	DLG3_HUMAN Disks large homolog 3	673	EVDGQDYHFVVSR	109.966	R	R.DNEVDGQDY#HFVVSR.E	1	11	11	547.407	687.142	813.688	940.258	409.439	854.595	982.089	1146.52	1416.54	1297.34	892.896	9987.92	1410.2	1100.1	1820.75	2160.51	1511.38	2307.36	2797.71	2726.22	1416.54	1366.37	1060.89	19678	7.16637	5.59048	9.25271	10.9793	7.68053	11.7256	14.2174	13.8541	7.1986	6.94364	5.39124
2407	sp|P11413-2|G6PD_HUMAN	G6PD	G6PD_HUMAN Isoform Long of Glucose-6-phosphate 1-dehydrogenase	447	QPNEAVYTKMMTK	30.8348	R	R.VQPNEAVY#TK.M	1	2	2	542.495	460.659	408.036	470.915	487.604	369.271	343.07	464.891	429.666	436.016	368.698	4781.32	1397.55	737.503	913.042	1082.06	1799.91	997.012	977.315	1105.43	429.666	459.216	438.067	10336.8	13.5201	7.13475	8.83295	10.4681	17.4127	9.6453	9.45474	10.6941	4.15667	4.44255	4.23795
1475	sp|Q9Y490|TLN1_HUMAN	TLN1	TLN1_HUMAN Talin-1	26	EPSTMVYDACRII	87.265	R	K.TM*QFEPSTMVY#DACR.I	1	9	7	515.153	453.946	379.924	367.414	341.748	341.327	384.397	472.972	591.977	522.947	524.707	4896.51	1327.11	726.756	850.138	844.24	1261.51	921.564	1095.04	1124.64	591.977	550.772	623.427	9917.18	13.3819	7.32826	8.57238	8.5129	12.7204	9.2926	11.0419	11.3404	5.96921	5.55372	6.28633
798	sp|P42685|FRK_HUMAN	FRK	FRK_HUMAN Tyrosine-protein kinase FRK	387	VDNEDIYESRHEI	31.2747	R	K.VDNEDIY#ESRHEIK.L	1	2	2	514.287	370.544	142.452	186.33	221.504	122.105	94.8659	116.6	975.647	817.757	928.751	4490.84	1324.88	593.231	318.758	428.146	817.647	329.677	270.248	277.253	975.647	861.269	1103.49	7300.24	18.1484	8.12618	4.3664	5.86482	11.2003	4.51598	3.7019	3.79785	13.3646	11.7978	15.1158
719	sp|Q86X29|LSR_HUMAN	LSR	LSR_HUMAN Lipolysis-stimulated lipoprotein receptor	406	DSMRVLYYMEKEL	30.8348	R	R.VLY#YMEK.E	1	4	4	510.4	1694.18	757.45	576.083	205.484	483.289	406.97	434.961	2099.09	2184.75	2195.46	11548.1	1314.87	2712.33	1694.91	1323.72	758.512	1304.85	1159.35	1034.26	2099.09	2301	2608.53	18311.4	7.18058	14.8122	9.25603	7.22891	4.14229	7.12591	6.3313	5.64816	11.4633	12.5659	14.2454
1160	sp|Q15464|SHB_HUMAN	SHB	SHB_HUMAN SH2 domain-containing adapter protein B	268	KGESAGYMEPYEA	97.7479	R	K.GESAGY#MEPYEAQR.I	1	13	11	509.329	684.9	512.256	425.945	318.824	402.754	393.057	363.244	1344.76	1148.43	927.839	7031.33	1312.11	1096.51	1146.25	978.731	1176.89	1087.41	1119.71	863.728	1344.76	1209.53	1102.41	12438	10.5491	8.81576	9.21569	7.86885	9.462	8.74265	9.00234	6.94425	10.8117	9.72446	8.86318
2909	sp|P30040|ERP29_HUMAN	ERP29	ERP29_HUMAN Endoplasmic reticulum resident protein 29	66	FDTQYPYGEKQDE	44.2778	R	K.FDTQYPY#GEK.Q	1	1	1	500.519	552.074	533.974	462.855	472.088	513.45	499.399	531.121	371.633	355.183	254.503	5046.8	1289.41	883.856	1194.85	1063.54	1742.64	1386.29	1422.66	1262.91	371.633	374.082	302.387	11294.2	11.4165	7.82572	10.5793	9.41668	15.4294	12.2743	12.5963	11.1819	3.29046	3.31215	2.67735
529	sp|P04083|ANXA1_HUMAN	ANXA1	ANXA1_HUMAN Annexin A1	21	ENEEQEYVQTVKS	93.0448	R	K.QAWFIENEEQEY#VQTVK.S	1	49	36	468.875	1728.63	1074.17	971.44	372.5	794.878	635.805	758.708	3572.74	2758.07	2176.9	15312.7	1207.89	2767.48	2403.61	2232.16	1375.02	2146.13	1811.24	1804.07	3572.74	2904.82	2586.47	24811.6	4.86825	11.154	9.68744	8.99643	5.54185	8.64967	7.29995	7.27107	14.3994	11.7075	10.4244
382	sp|P00533|EGFR_HUMAN	EGFR	EGFR_HUMAN Epidermal growth factor receptor	1172	SLDNPDYQQDFFP	156.508	R	K.GSHQIS#LDNPDY#QQDFFPK.E	1	42	17	462.306	1472.06	1042.74	1116.99	375.019	982.894	826.326	914.64	4028.5	2960.72	2898.99	17081.2	1190.97	2356.73	2333.3	2566.61	1384.32	2653.76	2353.98	2174.85	4028.5	3118.25	3444.42	27605.7	4.31421	8.53712	8.45223	9.29741	5.01462	9.61309	8.52716	7.87826	14.593	11.2957	12.4772
3204	sp|P18206|VINC_HUMAN	VCL	VINC_HUMAN Vinculin	822	SFLDSGYRILGAV	30.8348	R	K.SFLDSGY#R.I	1	3	3	436.664	325.505	288.217	283.854	322.234	251.899	236.661	275.253	444.94	424.947	338.425	3628.6	1124.91	521.124	644.929	652.235	1189.48	680.112	674.184	654.501	444.94	447.558	402.098	7436.07	15.1277	7.00806	8.67298	8.77124	15.996	9.14613	9.0664	8.80171	5.98354	6.01875	5.4074
2181	sp|Q8ND56-2|LS14A_HUMAN	LSM14A	LS14A_HUMAN Isoform 2 of Protein LSM14 homolog A	216	AAVGRRSPVSTRP	37.5398	R	R.S#PVSTRPLPSASQK.A	0	2	2	436.635	376.144	346.722	387.629	320.05	322.142	359.427	346.946	398.564	370.72	369.928	4034.91	1124.84	602.196	775.845	890.689	1181.41	869.765	1023.91	824.976	398.564	390.446	439.528	8522.17	13.1989	7.06623	9.10384	10.4514	13.8628	10.2059	12.0147	9.68035	4.67679	4.58153	5.15747
807	sp|P29353-6|SHC1_HUMAN	SHC1	SHC1_HUMAN Isoform 6 of SHC-transforming protein 1	428	LFDDPSYVNVQNL	24.437	R	R.ELFDDPSY#VNVQNLDK.A	1	5	4	433.931	2205.09	1701.42	1479.36	313.951	1728.97	1448.25	1461.98	2733.41	2403.77	1559.35	17469.5	1117.87	3530.29	3807.18	3399.25	1158.9	4668.12	4125.68	3476.34	2733.41	2531.67	1852.74	32401.4	3.45006	10.8955	11.75	10.491	3.57669	14.4071	12.733	10.729	8.43607	7.81346	5.71808
571	sp|Q9Y446|PKP3_HUMAN	PKP3	PKP3_HUMAN Plakophilin-3	390	AMRNLIYDNADNK	1000	U	R.NLIY#DNADNK.L	1	2	2	428.38	405.947	407.641	398.556	408.431	402.814	417.591	458.14	429.73	363.746	232.118	4353.09	1103.57	649.911	912.159	915.797	1507.66	1087.58	1189.6	1089.37	429.73	383.1	275.789	9544.27	11.5626	6.80944	9.55714	9.59526	15.7965	11.3951	12.4641	11.4139	4.5025	4.01393	2.88958
696	sp|Q14247-2|SRC8_HUMAN	CTTN	SRC8_HUMAN Isoform 2 of Src substrate cortactin	384	LPSSPVYEDAASF	37.5398	R	R.LPSSPVY#EDAASFK.A	1	2	2	425.573	323.804	90.5957	43.8632	111.208	100.518	69.0122	74.6411	278.495	253.151	138.784	1909.64	1096.34	518.401	202.722	100.788	410.508	271.392	196.597	177.483	278.495	266.621	164.896	3684.24	29.7575	14.0708	5.5024	2.73566	11.1423	7.3663	5.33617	4.81736	7.55908	7.23678	4.4757
1400	sp|P15529-2|MCP_HUMAN	CD46	MCP_HUMAN Isoform B of Membrane cofactor protein	387	GAEYATYQTKSTT	31.2747	R	K.ADGGAEYATY#QTK.S	1	2	2	420.553	427.812	263.471	324.758	204.558	205.497	188	290.038	389.844	452.845	521.093	3688.47	1083.41	684.916	589.557	746.224	755.094	554.83	535.561	689.657	389.844	476.94	619.134	7125.16	15.2053	9.61263	8.27429	10.4731	10.5976	7.78691	7.51648	9.67918	5.47137	6.69375	8.6894
1763	sp|P45984-4|MK09_HUMAN	MAPK9	MK09_HUMAN Isoform Beta-2 of Mitogen-activated protein kinase 9	185	NFMMTPYVVTRYY	31.2747	R	R.TACTNFM*M*TPY#VVTR.Y	1	10	8	412.675	330.014	310.739	500.352	342.745	280.937	261.207	507.372	548.7	469.284	497.637	4461.66	1063.11	528.344	695.326	1149.7	1265.19	758.514	744.108	1206.44	548.7	494.254	591.265	9044.96	11.7536	5.84131	7.68745	12.711	13.9878	8.38604	8.22678	13.3383	6.06637	5.46442	6.53696
684	sp|P49023-3|PAXI_HUMAN	PXN	PAXI_HUMAN Isoform Gamma of Paxillin	118	GEEEHVYSFPNKQ	30.8348	R	R.VGEEEHVY#SFPNK.Q	1	1	1	411.416	163.922	97.415	81.927	145.738	56.7111	63.7859	64.7527	544.766	398.888	288.875	2318.2	1059.87	262.435	217.981	188.251	537.968	153.117	181.709	153.97	544.766	420.113	343.225	4063.4	26.0833	6.45851	5.36449	4.63284	13.2393	3.76819	4.47184	3.78919	13.4067	10.3389	8.44674
1332	sp|Q9NWQ8|PHAG1_HUMAN	PAG1	PHAG1_HUMAN Phosphoprotein associated with glycosphingolipid-enriched microdomains 1	359	SSCNDLYATVKDF	48.8739	U	R.SPSSCNDLY#ATVK.D	1	2	2	399.511	204.804	67.6285	138.416	155.332	49.5682	34.1904	48.5633	245.141	283.259	354.147	1980.56	1029.2	327.887	151.329	318.05	573.383	133.832	97.3993	115.475	245.141	298.331	420.778	3710.8	27.7352	8.836	4.07807	8.57093	15.4517	3.60654	2.62475	3.11186	6.60615	8.03952	11.3393
3128	sp|P16333|NCK1_HUMAN	NCK1	NCK1_HUMAN Cytoplasmic protein NCK1	105	DPGERLYDLNMPA	98.5231	R	R.LY#DLNM*PAYVK.F	1	9	6	398.513	606.201	412.528	318.269	174.597	356.689	311.776	334.698	669.116	585.455	553.517	4721.36	1026.63	970.511	923.094	731.316	644.498	963.039	888.167	795.851	669.116	616.607	657.658	8886.49	11.5527	10.9212	10.3876	8.22953	7.25256	10.8371	9.99458	8.95575	7.52959	6.9387	7.40065
1819	sp|P29317|EPHA2_HUMAN	EPHA2	EPHA2_HUMAN Ephrin type-A receptor 2	594	YVDPHTYEDPNQA	28.2181	U	K.TYVDPHT#Y#EDPNQAVLK.F	1	2	1	393.415	336.141	274.299	261.366	208.883	199.888	176.094	177.45	456.089	424.633	315.323	3223.58	1013.5	538.153	613.785	600.563	771.06	539.687	501.644	421.944	456.089	447.227	374.649	6278.3	16.1428	8.57164	9.7763	9.5657	12.2813	8.59607	7.99013	6.72068	7.26453	7.12339	5.96737
2211	sp|Q00526|CDK3_HUMAN	CDK3	CDK3_HUMAN Cyclin-dependent kinase 3	19	GTYGVVYKAKNRE	59.2977	R	K.IGEGTYGVVY#K.A	1	1	1	378.033	349.584	323.807	312.626	363.995	264.357	317.814	323.114	445.822	405.922	267.742	3752.81	973.867	559.675	724.568	718.347	1343.63	713.75	905.366	768.306	445.822	427.52	318.116	7898.97	12.329	7.08542	9.17294	9.09419	17.0102	9.03599	11.4618	9.72667	5.64406	5.41236	4.02731
483	sp|Q9H4G0|E41L1_HUMAN	EPB41L1	E41L1_HUMAN Band 4.1-like protein 1	343	KIRPGEYEQFEST	85.2649	R	K.IRPGEY#EQFESTIGFK.L	1	3	3	370.071	300.655	180.195	168.467	199.224	170.999	129.15	155.694	417.953	404.93	362.998	2860.34	953.356	481.341	403.213	387.101	735.404	461.689	367.915	370.212	417.953	426.476	431.294	5435.95	17.538	8.85476	7.41753	7.12112	13.5285	8.49324	6.76817	6.81043	7.68868	7.84547	7.9341
1924	sp|Q08345-5|DDR1_HUMAN	DDR1	DDR1_HUMAN Isoform 4 of Epithelial discoidin domain-containing receptor 1	520	RLLLATYARPPRG	17.0091	R	R.LLLATY#ARPPR.G	1	1	1	364.78	187.952	163.822	83.7123	120.058	116.794	80.1711	62.3061	364.019	272.183	182.221	1998.02	939.726	300.906	366.577	192.353	443.174	315.336	228.386	148.153	364.019	286.666	216.504	3801.8	24.7179	7.91483	9.64219	5.05953	11.6569	8.29439	6.00731	3.89691	9.57492	7.54026	5.69479
1663	sp|P15941-2|MUC1_HUMAN	MUC1	MUC1_HUMAN Isoform 2 of Mucin-1	1238	STDRSPYEKVSAG	31.2747	R	R.YVPPSSTDRSPY#EK.V	1	2	2	360.824	377.057	248.575	243.998	219.217	219.307	175.685	206.332	261.882	252.149	271.928	2836.95	929.534	603.658	556.223	560.656	809.203	592.115	500.478	490.621	261.882	265.565	323.09	5893.03	15.7735	10.2436	9.43867	9.51388	13.7315	10.0477	8.49272	8.32545	4.44393	4.50643	5.48258
1546	sp|P27986-4|P85A_HUMAN	PIK3R1	P85A_HUMAN Isoform 4 of Phosphatidylinositol 3-kinase regulatory subunit alpha	467	REYDRLYEEYTRT	53.5337	R	R.EYDRLY#EEYTR.T	1	4	4	351.722	349.475	312.451	386.288	301.169	351.619	358.715	390.568	628.462	502.25	455.331	4388.05	906.088	559.5	699.156	887.607	1111.72	949.352	1021.88	928.699	628.462	528.975	540.999	8762.44	10.3406	6.38521	7.97901	10.1297	12.6873	10.8343	11.6621	10.5986	7.17222	6.03684	6.17408
3723	sp|Q9H1E3|NUCKS_HUMAN	NUCKS1	NUCKS_HUMAN Nuclear ubiquitous casein and cyclin-dependent kinase substrate 1	181	KATVTPSPVKGKG	48.8739	R	K.ATVTPS#PVK.G	0	1	1	339.854	246.346	230.782	246.655	263.765	154.746	181.964	188.202	238.643	228.622	200.675	2520.25	875.513	394.393	516.41	566.76	973.647	417.804	518.367	447.51	238.643	240.786	238.431	5428.26	16.1288	7.26554	9.51336	10.4409	17.9366	7.69683	9.54941	8.24408	4.3963	4.43579	4.3924
2071	sp|Q9UJM3|ERRFI_HUMAN	ERRFI1	ERRFI_HUMAN ERBB receptor feedback inhibitor 1	394	KVSSTHYYLLPER	30.8348	U	K.KVSSTHY#YLLPERPPYLDK.Y	1	10	9	329.984	1052.59	1163.92	948.664	303.548	1143.19	1110.5	1141.12	1205.76	1075.58	777.36	10252.2	850.086	1685.17	2604.46	2179.83	1120.5	3086.54	3163.53	2713.38	1205.76	1132.81	923.616	20665.7	4.11352	8.15444	12.6028	10.5481	5.42203	14.9356	15.3081	13.1299	5.83462	5.48159	4.46933
1742	sp|Q16539|MK14_HUMAN	MAPK14	MK14_HUMAN Mitogen-activated protein kinase 14	182	DDEMTGYVATRWY	59.2977	R	R.HTDDEMTGY#VATR.W	1	10	5	329.152	257.851	249.913	152.572	340.933	161.085	107.918	101.229	262.029	200.633	110.815	2274.13	847.944	412.813	559.217	350.579	1258.5	434.92	307.428	240.705	262.029	211.309	131.664	5017.11	16.9011	8.2281	11.1462	6.98767	25.0842	8.66874	6.1276	4.79768	5.22272	4.21177	2.6243
2850	sp|Q86VM9|ZCH18_HUMAN	ZC3H18	ZCH18_HUMAN Zinc finger CCCH domain-containing protein 18	534	KLGVSVSPSRARR	30.8348	R	K.KLGVSVS#PSR.A	0	1	1	325.645	381.471	333.435	330.836	298.274	336.93	355.248	360.394	371.096	359.425	333.767	3786.52	838.909	610.725	746.111	760.191	1101.03	909.694	1012.01	856.951	371.096	378.55	396.563	7981.83	10.5102	7.65145	9.34762	9.52403	13.7942	11.3971	12.6789	10.7363	4.64926	4.74265	4.96832
3555	sp|Q07352|TISB_HUMAN	ZFP36L1	TISB_HUMAN Zinc finger protein 36, C3H1 type-like 1	54	GFPRRHSVTLPSS	20.1669	R	R.RHS#VTLPSSK.F	0	1	1	318.115	144.684	118.018	95.7737	118.391	122.267	83.7393	64.5098	300.065	248.904	113.478	1727.94	819.51	231.636	264.083	220.068	437.023	330.113	238.551	153.393	300.065	262.147	134.828	3391.42	24.1643	6.83005	7.78681	6.48896	12.8862	9.73377	7.03396	4.52297	8.84777	7.72973	3.97558
1465	sp|O60674|JAK2_HUMAN	JAK2	JAK2_HUMAN Tyrosine-protein kinase JAK2	570	RREVGDYGQLHET	97.6019	R	R.EVGDY#GQLHETEVLLK.V	1	1	1	312.334	431.348	248.337	261.048	359.021	298.557	197.591	205.461	233.279	262.734	218.165	3027.88	804.618	690.577	555.693	599.832	1325.27	806.088	562.885	488.55	233.279	276.714	259.211	6602.71	12.1862	10.459	8.41613	9.08463	20.0716	12.2084	8.52505	7.39923	3.53308	4.19091	3.92582
3325	sp|P20309|ACM3_HUMAN	CHRM3	ACM3_HUMAN Muscarinic acetylcholine receptor M3	365	SETRAIYSIVLKL	24.437	U	R.AIY#SIVLK.L	1	1	1	306.729	200.154	89.7428	87.9769	98.3817	56.1349	49.3434	81.2065	557.027	522.432	598.326	2647.45	790.178	320.442	200.813	202.152	363.16	151.561	140.566	193.094	557.027	550.23	710.897	4180.12	18.9032	7.66584	4.804	4.83603	8.68779	3.62576	3.36273	4.61935	13.3256	13.163	17.0066
3029	sp|Q01968|OCRL_HUMAN	OCRL	OCRL_HUMAN Inositol polyphosphate 5-phosphatase OCRL-1	133	KDSSSWYQKLDTK	17.0091	R	K.DSSSWY#QK.L	1	1	1	301.404	297.648	364.188	350.799	310.208	394.192	411.51	393.482	481.873	536.411	511.179	4352.9	776.462	476.527	814.927	806.061	1145.08	1064.3	1172.28	935.63	481.873	564.953	607.355	8845.45	8.77809	5.38726	9.21295	9.11272	12.9455	12.0321	13.2529	10.5775	5.4477	6.38693	6.86629
3552	sp|Q8TD16-2|BICD2_HUMAN	BICD2	BICD2_HUMAN Isoform 2 of Protein bicaudal D homolog 2	582	EARGRRSPILLPK	1000	R	R.GRRS#PILLPK.G	0	2	2	295.568	334.704	320.486	306.937	251.056	241.261	286.647	268.99	382.807	401.777	345.363	3435.6	761.425	535.853	717.136	705.277	926.732	651.391	816.581	639.611	382.807	423.155	410.341	6970.31	10.9238	7.68765	10.2884	10.1183	13.2954	9.34522	11.7151	9.17622	5.49196	6.07082	5.88698
3104	sp|P05067|A4_HUMAN	APP	A4_HUMAN Amyloid beta A4 protein	757	KMQQNGYENPTYK	109.943	R	K.M*QQNGY#ENPTYK.F	1	3	3	293.931	311.577	281.409	190.715	134.093	155.782	194.365	179.801	276.911	239.902	171.784	2430.27	757.21	498.826	629.696	438.223	494.983	420.602	553.695	427.535	276.911	252.667	204.104	4954.45	15.2834	10.0682	12.7097	8.84504	9.99068	8.48937	11.1757	8.62932	5.58913	5.0998	4.1196
2336	sp|Q9BXB4|OSB11_HUMAN	OSBPL11	OSB11_HUMAN Oxysterol-binding protein-related protein 11	189	ISQRRPSQNAISF	60.3582	U	R.RPS#QNAISFFNVGHSK.L	0	2	2	288.449	259.002	176.646	170.858	148.812	152.092	122.436	118.738	404.222	391.673	348.069	2581	743.087	414.655	395.274	392.596	549.316	410.641	348.789	282.338	404.222	412.513	413.556	4766.99	15.5882	8.69847	8.2919	8.23572	11.5233	8.61427	7.31676	5.92277	8.47961	8.65355	8.67543
2873	sp|P11171|41_HUMAN	EPB41	41_HUMAN Protein 4.1	660	LDGENIYIRHSNL	1000	R	R.ERLDGENIY#IR.H	1	3	3	287.894	578.319	289.156	185.034	129.15	210.9	162.821	184.008	404.332	399.65	373.897	3205.16	741.657	925.874	647.031	425.169	476.738	569.419	463.834	437.539	404.332	420.915	444.244	5956.75	12.4507	15.5433	10.8621	7.1376	8.00333	9.55922	7.78669	7.34525	6.78779	7.06618	7.45782
3677	sp|Q9BWU0|NADAP_HUMAN	SLC4A1AP	NADAP_HUMAN Kanadaptin	82	KPALPVSPAARSK	1000	U	K.KPALPVS#PAAR.S	0	1	1	286.924	263.469	293.003	328.891	202.171	174.741	221.41	198.019	355.403	380.243	396.687	3100.96	739.158	421.807	655.639	755.722	746.281	471.791	630.737	470.853	355.403	400.475	471.322	6119.19	12.0793	6.89319	10.7145	12.35	12.1958	7.71002	10.3075	7.6947	5.80801	6.54458	7.70236
859	sp|Q9H792|PEAK1_HUMAN	PEAK1	PEAK1_HUMAN Pseudopodium-enriched atypical kinase 1	531	KSSAIRYQEVWTS	122.185	R	R.Y#QEVWTSSTSPR.Q	1	2	2	282.963	280.052	257.268	226.137	268.972	336.429	325.636	363.562	405.083	425.303	324.892	3496.3	728.954	448.356	575.675	519.615	992.867	908.339	927.651	864.486	405.083	447.933	386.019	7204.98	10.1174	6.22286	7.98997	7.21189	13.7803	12.6071	12.8751	11.9984	5.62227	6.21699	5.35767
1790	sp|Q5T5P2|SKT_HUMAN	KIAA1217	SKT_HUMAN Sickle tail protein homolog	244	DESRNVYYELNDV	48.8739	R	R.NVY#YELNDVR.N	1	3	3	282.371	312.301	278.486	276.843	260.17	275.942	290.855	376.697	449.861	400.793	375.561	3579.88	727.429	499.986	623.155	636.125	960.375	745.029	828.569	895.717	449.861	422.119	446.221	7234.59	10.0549	6.91105	8.61356	8.79284	13.2748	10.2982	11.4529	12.381	6.21821	5.83473	6.16789
2584	sp|O00429-6|DNM1L_HUMAN	DNM1L	DNM1L_HUMAN Isoform 6 of Dynamin-1-like protein	629	IPIMPASPQKGHA	115.699	R	K.SKPIPIM*PAS#PQK.G	0	2	2	274.854	222.316	246.63	268.979	187.405	161.769	172.325	155.013	287.027	272.926	537.601	2786.84	708.063	355.922	551.871	618.057	691.774	436.767	490.907	368.592	287.027	287.448	638.748	5435.18	13.0274	6.54849	10.1537	11.3714	12.7277	8.03593	9.03204	6.7816	5.28092	5.28867	11.7521
1818	sp|P29317|EPHA2_HUMAN	EPHA2	EPHA2_HUMAN Ephrin type-A receptor 2	772	DDPEATYTTSGGK	30.8348	U	R.VLEDDPEATY#TTSGGK.I	1	1	1	273.195	184.842	136.431	123.19	151.972	105.085	96.7761	108.825	339.404	291.005	291.635	2102.36	703.791	295.927	305.284	283.064	560.98	283.725	275.689	258.766	339.404	306.489	346.505	3959.62	17.7742	7.47361	7.70993	7.14876	14.1675	7.16545	6.96251	6.53511	8.57162	7.74035	8.75095
3415	sp|Q01813|K6PP_HUMAN	PFKP	K6PP_HUMAN 6-phosphofructokinase type C	386	VRLRGRSFAGNLN	110.807	R	R.GRS#FAGNLNTYK.R	0	2	2	266.937	244.636	244.754	279.138	256.127	224.175	196.044	245.209	323.302	329.712	313.709	2923.74	687.669	391.656	547.675	641.401	945.451	605.259	558.478	583.062	323.302	347.255	372.732	6003.94	11.4536	6.52331	9.12193	10.683	15.7472	10.081	9.30185	9.71133	5.38483	5.78379	6.20812
2980	sp|Q8N0Y7|PGAM4_HUMAN	PGAM4	PGAM4_HUMAN Probable phosphoglycerate mutase 4	92	RLNERHYGGLTGL	27.1205	R	R.HY#GGLTGLNK.A	1	1	1	265.372	172.108	162.998	108.008	191.272	131.868	129.493	103.985	196.755	151.261	72.2353	1685.35	683.637	275.541	364.733	248.178	706.05	356.035	368.891	247.258	196.755	159.309	85.826	3692.21	18.5156	7.46275	9.87845	6.72167	19.1227	9.64287	9.99106	6.69673	5.32891	4.31473	2.32451
1042	sp|Q8N3R9|MPP5_HUMAN	MPP5	MPP5_HUMAN MAGUK p55 subfamily member 5	243	ITDERVYESIGQY	48.8739	R	R.VY#ESIGQYGGETVK.I	1	1	1	265.068	130.816	62.6595	76.92	129.638	54.9097	40.4047	41.8885	191.671	181.187	193.416	1368.58	682.853	209.432	140.21	176.746	478.539	148.253	115.102	99.6033	191.671	190.828	229.806	2663.04	25.6418	7.86439	5.26503	6.63698	17.9696	5.56706	4.3222	3.7402	7.19746	7.16577	8.62945
2556	sp|Q05397|FAK1_HUMAN	PTK2	FAK1_HUMAN Focal adhesion kinase 1	576	YMEDSTYYKASKG	30.8348	R	R.YM*EDSTY#YK.A	1	1	1	264.835	166.031	156.175	171.271	278.804	105.467	132.79	125.546	439.168	452.855	378.287	2671.23	682.254	265.811	349.466	393.545	1029.16	284.756	378.283	298.526	439.168	476.95	449.46	5047.38	13.517	5.26631	6.92372	7.79701	20.39	5.64166	7.49464	5.91448	8.70091	9.44946	8.90481
2347	sp|Q8WZ64|ARAP2_HUMAN	ARAP2	ARAP2_HUMAN Arf-GAP with Rho-GAP domain, ANK repeat and PH domain-containing protein 2	77	MQDIPIYANVHKT	1000	U	K.MQDIPIY#ANVHK.T	1	1	1	262.37	105.645	58.2916	61.9863	86.236	43.1288	41.2892	45.8341	199.444	169.173	160.481	1233.88	675.904	169.136	130.436	142.431	318.326	116.445	117.622	108.985	199.444	178.174	190.674	2347.58	28.7915	7.20469	5.55621	6.06716	13.5598	4.96024	5.01035	4.64246	8.49573	7.5897	8.12216
596	sp|Q12774|ARHG5_HUMAN	ARHGEF5	ARHG5_HUMAN Rho guanine nucleotide exchange factor 5	1370	RTEELIYLSQKIE	59.2977	R	R.RTEELIY#LSQK.I	1	4	3	262.254	457.07	395.248	349.721	181.422	364.447	354.214	349.743	585.628	509.62	433.06	4242.43	675.604	731.757	884.428	803.584	669.69	983.987	1009.06	831.625	585.628	536.736	514.538	8226.64	8.2124	8.89497	10.7508	9.76807	8.1405	11.961	12.2658	10.1089	7.11868	6.52436	6.25453
1011	sp|Q09666|AHNK_HUMAN	AHNAK	AHNK_HUMAN Neuroblast differentiation-associated protein AHNAK	1469	PKMKGDYDVTVPK	53.5337	U	K.GDY#DVTVPK.V	1	8	8	259.293	3749.02	1961.49	1079.72	218.642	1702.66	1237.4	1114.56	5770.3	4904.25	2398.21	24395.5	667.975	6002.08	4389.14	2480.97	807.08	4597.09	3525.01	2650.21	5770.3	5165.2	2849.42	38904.5	1.71696	15.4277	11.2818	6.37709	2.07452	11.8163	9.06068	6.8121	14.832	13.2766	7.32415
3059	sp|P54760|EPHB4_HUMAN	EPHB4	EPHB4_HUMAN Ephrin type-B receptor 4	614	KEIDVSYVKIEEV	48.8739	R	K.EIDVSY#VK.I	1	2	2	257.382	275.004	256.932	238.524	215.849	254.914	256.345	238.031	252.617	209.797	213.352	2668.74	663.053	440.274	574.924	548.077	796.771	688.254	730.258	565.994	252.617	220.96	253.493	5734.67	11.5622	7.67741	10.0254	9.55724	13.8939	12.0016	12.7341	9.86968	4.40508	3.85305	4.42036
815	sp|P19174-2|PLCG1_HUMAN	PLCG1	PLCG1_HUMAN Isoform 2 of 1-phosphatidylinositol 4,5-bisphosphate phosphodiesterase gamma-1	1254	GSFESRYQQPFED	1000	R	R.Y#QQPFEDFR.I	1	6	6	254.795	600.094	365.043	339.493	180.224	261.285	267.741	272.433	1152.23	1044.73	1229.42	5967.48	656.39	960.735	816.839	780.083	665.267	705.456	762.722	647.797	1152.23	1100.31	1460.72	9708.56	6.76095	9.89575	8.4136	8.035	6.85237	7.26633	7.85618	6.67243	11.8682	11.3334	15.0457
892	sp|P07947|YES_HUMAN	YES1	YES_HUMAN Tyrosine-protein kinase Yes	446	APEAALYGRFTIK	181.488	R	K.WTAPEAALY#GR.F	1	3	3	253.882	270.705	244.875	240.051	211.288	250.839	230.737	247.745	353.624	321.79	321.694	2947.23	654.037	433.392	547.945	551.586	779.938	677.251	657.309	589.092	353.624	338.912	382.219	5965.31	10.964	7.2652	9.18554	9.24657	13.0746	11.3532	11.0189	9.8753	5.92801	5.68139	6.40737
962	sp|P08493-2|MGP_HUMAN	MGP	MGP_HUMAN Isoform 2 of Matrix Gla protein	107	YRLCERYAMVYGY	76.7327	R	R.Y#AM*VYGYNAAYNR.Y	1	4	4	249.682	292.09	279.412	241.689	200.592	215.022	212.242	195	289.902	251.651	219.582	2646.86	643.218	467.628	625.226	555.35	740.454	580.547	604.62	463.675	289.902	265.041	260.895	5496.56	11.7022	8.50765	11.3749	10.1036	13.4712	10.562	11	8.43574	5.27425	4.82194	4.74651
2600	sp|Q9UHF7-2|TRPS1_HUMAN	TRPS1	TRPS1_HUMAN Isoform 2 of Zinc finger transcription factor Trps1	905	LRRRRGSGVFCAN	137.135	R	R.RGS#GVFCANCLTTK.T	0	1	1	248.845	197.434	166.404	153.416	114.343	112.514	112.049	103.402	231.258	191.053	169.828	1800.55	641.061	316.087	372.353	352.516	422.079	303.782	319.198	245.871	231.258	201.219	201.78	3607.2	17.7717	8.76265	10.3225	9.77256	11.701	8.42154	8.84891	6.8161	6.411	5.57824	5.59382
1619	sp|P07108-5|ACBP_HUMAN	DBI	ACBP_HUMAN Isoform 5 of Acyl-CoA-binding protein	90	EEMLFIYGHYKQA	51.0043	R	K.TKPSDEEMLFIY#GHYK.Q	1	2	2	242.22	203.193	140.169	135.571	169.904	135.203	101.263	147.537	204.351	179.257	128.994	1787.66	623.993	325.307	313.65	311.513	627.175	365.041	288.473	350.816	204.351	188.795	153.264	3752.38	16.6293	8.66936	8.35871	8.30174	16.7141	9.72826	7.68773	9.34916	5.44592	5.03134	4.08445
3561	sp|P52272|HNRPM_HUMAN	HNRNPM	HNRPM_HUMAN Heterogeneous nuclear ribonucleoprotein M	64	GNRFEPYANPTKR	58.5514	R	R.FEPY#ANPTK.R	1	2	2	241.261	437.179	315.322	293.62	167.091	216.987	154.756	196.059	382.17	422.743	419.11	3246.3	621.523	699.913	705.581	674.676	616.788	585.854	440.858	466.194	382.17	445.236	497.963	6136.76	10.1279	11.4053	11.4976	10.994	10.0507	9.54664	7.18389	7.59674	6.22756	7.25524	8.11443
680	sp|Q05655|KPCD_HUMAN	PRKCD	KPCD_HUMAN Protein kinase C delta type	333	MQDNSGTYGKIWE	17.0091	U	K.TGVAGEDMQDNSGT#YGK.I	0	1	1	239.808	106.064	39.7436	58.25	73.7505	19.8519	22.1073	21.2227	157.267	211.926	164.419	1114.41	617.781	169.805	88.9325	133.846	272.238	53.599	62.9779	50.4639	157.267	223.202	195.354	2025.47	30.5007	8.38351	4.39072	6.60817	13.4408	2.64625	3.1093	2.49147	7.76448	11.0198	9.64488
1496	sp|Q12846|STX4_HUMAN	STX4	STX4_HUMAN Syntaxin-4	251	ILSSADYVERGQE	57.7111	R	K.NILSSADY#VER.G	1	3	3	239.219	378.361	316.848	265.403	155.513	365.38	359.2	366.335	734.903	653.16	505.478	4339.8	616.264	605.747	708.995	609.839	574.052	986.505	1023.26	871.079	734.903	687.914	600.581	8019.14	7.68491	7.55376	8.84128	7.60479	7.15851	12.3019	12.7603	10.8625	9.16436	8.5784	7.48934
1101	sp|Q13480-2|GAB1_HUMAN	GAB1	GAB1_HUMAN Isoform 2 of GRB2-associated-binding protein 1	689	ADERVDYVVVDQQ	1000	R	R.VDY#VVVDQQK.T	1	8	7	235.485	1610.7	1373.36	1038.36	125	385.799	341.33	334.432	2546.99	2118.09	1385.45	11495	606.644	2578.69	3073.1	2385.92	461.418	1041.63	972.358	795.22	2546.99	2230.79	1646.12	18338.9	3.30797	14.0613	16.7573	13.0102	2.51607	5.67993	5.30217	4.33625	13.8885	12.1642	8.9761
542	sp|Q96TA1|NIBL1_HUMAN	FAM129B	NIBL1_HUMAN Niban-like protein 1	665	QGLRPESPPPAGP	109.721	R	R.GLLAQGLRPES#PPPAGPLLNGAPAGESPQPK.A	0	4	3	235.142	259.319	211.216	276.724	196.108	186.279	194.172	229.958	292.233	303.448	313.289	2697.89	605.761	415.163	472.628	635.853	723.901	502.942	553.143	546.8	292.233	319.594	372.232	5440.25	11.1348	7.63132	8.68762	11.6879	13.3064	9.24483	10.1676	10.051	5.37168	5.87463	6.84219
679	sp|Q05655|KPCD_HUMAN	PRKCD	KPCD_HUMAN Protein kinase C delta type	334	QDNSGTYGKIWEG	24.437	U	K.TGVAGEDM*QDNSGTY#GK.I	1	2	2	234.154	138.919	58.9365	79.1478	84.1468	51.8022	39.1275	52.7132	264.034	274.047	271.535	1548.56	603.215	222.405	131.88	181.865	310.614	139.863	111.464	125.343	264.034	288.629	322.622	2701.93	22.3253	8.23133	4.88093	6.73092	11.496	5.17641	4.12534	4.63899	9.77205	10.6823	11.9404
1161	sp|Q15464|SHB_HUMAN	SHB	SHB_HUMAN SH2 domain-containing adapter protein B	246	VTIADDYSDPFDA	48.8739	R	K.VTIADDY#SDPFDAK.N	1	3	3	233.797	592.186	422.759	361.997	142.263	311.428	289.363	314.895	1508.64	1201.46	1030.65	6409.44	602.295	948.074	945.989	831.792	525.141	840.838	824.318	748.763	1508.64	1265.38	1224.56	10265.8	5.867	9.23527	9.21495	8.10255	5.11544	8.19067	8.02975	7.29376	14.6958	12.3262	11.9286
2969	sp|P05141|ADT2_HUMAN	SLC25A5	ADT2_HUMAN ADP/ATP translocase 2	191	IIYRAAYFGIYDT	76.7327	U	R.AAY#FGIYDTAK.G	1	2	2	233.347	278.851	243.611	234.109	247.289	281.794	255.98	258.973	287.747	293.503	296.197	2911.4	601.135	446.433	545.117	537.934	912.826	760.828	729.218	615.792	287.747	309.12	351.925	6098.08	9.85778	7.32089	8.93917	8.82137	14.9691	12.4765	11.9582	10.0981	4.71865	5.06914	5.77109
937	sp|O60547|GMDS_HUMAN	GMDS	GMDS_HUMAN GDP-mannose 4,6 dehydratase	323	VTVDLKYYRPTEV	19.8431	R	K.Y#YRPTEVDFLQGDCTK.A	1	1	1	231.98	213.833	196.978	221.475	211.142	172.436	159.181	187.251	196.114	191.442	173.062	2154.89	597.613	342.341	440.769	508.903	779.396	465.567	453.463	445.248	196.114	201.628	205.623	4636.66	12.8889	7.38334	9.50617	10.9756	16.8094	10.041	9.77994	9.60277	4.22963	4.34857	4.43471
389	sp|P00533|EGFR_HUMAN	EGFR	EGFR_HUMAN Epidermal growth factor receptor	995	LPSPTDSNFYRAL	20.1669	R	R.M*HLPSPTDS#NFYR.A	0	4	4	226.594	279.825	196.137	137.745	129.052	168.957	151.442	156.852	571.22	505.007	395.698	2918.53	583.738	447.993	438.887	316.509	476.375	456.175	431.418	372.965	571.22	531.877	470.147	5097.31	11.4519	8.78881	8.61018	6.20935	9.34562	8.94934	8.46365	7.3169	11.2063	10.4345	9.22343
2106	sp|P49840|GSK3A_HUMAN	GSK3A	GSK3A_HUMAN Glycogen synthase kinase-3 alpha	282	NVSYICSRYYRAP	73.3109	R	R.GEPNVS#YICS#R.Y	0	2	2	226.42	178.337	171.067	184.681	191.476	148.866	131.335	150.44	182.709	167.457	153.753	1886.54	583.291	285.513	382.788	424.356	706.804	401.931	374.139	357.719	182.709	176.367	182.681	4058.3	14.3728	7.03528	9.43223	10.4565	17.4163	9.90393	9.21912	8.8145	4.50211	4.34583	4.50142
697	sp|Q14247-2|SRC8_HUMAN	CTTN	SRC8_HUMAN Isoform 2 of Src substrate cortactin	409	TEPEPVYSMEAAD	27.0548	R	R.GPVSGTEPEPVY#SM*EAADYR.E	1	4	4	224.861	184.804	167.12	128.641	103.984	122.293	125.145	131.568	296.477	292.408	253.614	2030.92	579.276	295.866	373.957	295.589	383.841	330.183	356.504	312.845	296.477	307.967	301.331	3833.84	15.1096	7.71723	9.75412	7.71002	10.0119	8.61234	9.29888	8.16011	7.73316	8.03287	7.85977
2991	sp|P06213|INSR_HUMAN	INSR	INSR_HUMAN Insulin receptor	1189	DIYETDYYRKGGK	17.0091	R	R.DIYETDY#YRK.G	1	1	1	221.403	154.548	122.415	84.8496	169.535	85.7953	64.9224	81.0183	334.298	184.092	145.538	1648.41	570.367	247.427	273.922	194.966	625.813	231.643	184.947	192.647	334.298	193.888	172.92	3222.84	17.6977	7.67732	8.49939	6.04953	19.4181	7.18754	5.73863	5.97755	10.3728	6.01606	5.36546
3014	sp|Q00535|CDK5_HUMAN	CDK5	CDK5_HUMAN Cyclin-dependent kinase 5	15	KIGEGTYGTVFKA	24.437	R	K.IGEGTY#GTVFK.A	1	1	1	220.565	264.781	239.292	254.163	163.676	156.743	160.106	223.382	295.252	276.926	174.824	2429.71	568.207	423.908	535.453	584.012	604.185	423.198	456.099	531.163	295.252	291.661	207.716	4920.85	11.5469	8.61452	10.8813	11.8681	12.278	8.60008	9.26869	10.7941	6.00002	5.92705	4.22115
3347	sp|P41743|KPCI_HUMAN	PRKCI	KPCI_HUMAN Protein kinase C iota type	136	RRWRKLYCANGHT	52.4027	U	K.LY#CANGHTFQAK.R	1	1	1	216.492	159.089	145.465	150.491	175.094	139.555	135.329	146.767	196.004	182.637	151.977	1798.9	557.714	254.698	325.501	345.797	646.33	376.79	385.515	348.986	196.004	192.355	180.571	3810.26	14.6372	6.68452	8.54274	9.07541	16.9629	9.88883	10.1178	9.15912	5.14412	5.04833	4.73906
2835	sp|P16949-2|STMN1_HUMAN	STMN1	STMN1_HUMAN Isoform 2 of Stathmin	16	ELEKRASGQAFEL	113.176	R	K.RAS#GQAFELILSPR.S	0	2	2	216.325	209.586	219.159	180.209	201.767	226.823	239.548	218.058	200.063	147.179	133.697	2192.41	557.285	335.541	490.403	414.081	744.791	612.409	682.409	518.503	200.063	155.011	158.852	4869.35	11.4448	6.89089	10.0712	8.50383	15.2955	12.5768	14.0144	10.6483	4.10863	3.18339	3.26228
1891	sp|Q00341|VIGLN_HUMAN	HDLBP	VIGLN_HUMAN Vigilin	437	LINRMDYVEINID	1000	R	R.M*DY#VEINIDHK.F	1	2	2	216.209	216.523	225.605	282.85	190.854	208.503	217.647	372.101	484.103	398.508	423.144	3236.05	556.986	346.648	504.827	649.93	704.506	562.946	620.017	884.789	484.103	419.712	502.756	6237.22	8.93004	5.55773	8.09378	10.4202	11.2952	9.02559	9.9406	14.1856	7.76151	6.72915	8.06058
35	sp|O60716|CTND1_HUMAN	CTNND1	CTND1_HUMAN Catenin delta-1	257	PSRQDVYGPQPQV	1000	R	R.QDVY#GPQPQVR.V	1	3	3	214.525	313.108	155.021	146.787	76.0822	124.768	102.701	98.5369	427.134	658.228	568.901	2885.79	552.646	501.278	346.883	337.285	280.845	336.865	292.567	234.303	427.134	693.251	675.936	4678.99	11.8112	10.7134	7.41362	7.2085	6.00226	7.19953	6.25278	5.00755	9.12875	14.8162	14.4462
1952	sp|Q8IZP0|ABI1_HUMAN	ABI1	ABI1_HUMAN Abl interactor 1	215	VPNDYMTSPARLG	20.1669	R	K.TLEPVKPPTVPNDYM*T#SPAR.L	0	1	1	212.964	277.221	147.371	126.411	107.38	96.8592	66.0268	72.3079	414.278	387.016	428.777	2336.61	548.626	443.824	329.765	290.465	396.377	261.514	188.093	171.935	414.278	407.609	509.449	3961.93	13.8474	11.2022	8.32332	7.33139	10.0046	6.60067	4.7475	4.33968	10.4565	10.2881	12.8586
635	sp|Q99569|PKP4_HUMAN	PKP4	PKP4_HUMAN Plakophilin-4	281	YSQRPASPTAIRR	20.1669	R	R.AASPYS#QRPAS#PTAIR.R	0	2	2	212.047	325.841	220.771	192.19	137.495	184.107	165.144	148.666	398.703	353.285	261.802	2600.05	546.265	521.664	494.008	441.611	507.54	497.08	470.452	353.502	398.703	372.083	311.059	4913.97	11.1166	10.6159	10.0531	8.98685	10.3285	10.1157	9.57378	7.19382	8.11367	7.57195	6.33009
3678	sp|Q9Y3L5|RAP2C_HUMAN	RAP2C	RAP2C_HUMAN Ras-related protein Rap-2c	166	IVRQMNYSSLPEK	17.0091	U	R.QM*NY#SSLPEK.Q	1	1	1	208.988	187.256	207.081	161.371	135.98	175.677	181.294	193.148	238.752	196.48	133.495	2019.52	538.383	299.791	463.376	370.796	501.948	474.318	516.458	459.272	238.752	206.935	158.612	4228.64	12.7318	7.08954	10.958	8.76868	11.8702	11.2168	12.2133	10.861	5.64606	4.89365	3.7509
3619	sp|Q9H0B6|KLC2_HUMAN	KLC2	KLC2_HUMAN Kinesin light chain 2	582	RMKRASSLNFLNK	17.0091	R	K.RASS#LNFLNK.S	0	1	1	208.282	254.144	295.009	227.514	200.033	163.331	126.642	154.388	240.749	343.104	265.155	2478.35	536.565	406.879	660.128	522.78	738.39	440.985	360.77	367.108	240.749	361.36	315.042	4950.76	10.838	8.21852	13.3339	10.5596	14.9147	8.90742	7.28717	7.41519	4.86287	7.2991	6.36352
3197	sp|P00558|PGK1_HUMAN	PGK1	PGK1_HUMAN Phosphoglycerate kinase 1	196	MKKELNYFAKALE	1000	R	K.ELNY#FAK.A	1	1	1	204.78	145.384	122.167	127.098	151.551	105.124	101.201	118.548	187.517	181.294	156.592	1601.26	527.543	232.756	273.366	292.044	559.428	283.829	288.293	281.887	187.517	190.941	186.053	3303.66	15.9685	7.0454	8.27466	8.84003	16.9336	8.59135	8.72649	8.53257	5.67603	5.77967	5.63174
2128	sp|Q8IY95|TM192_HUMAN	TMEM192	TM192_HUMAN Transmembrane protein 192	213	LEEEKIYAYPSNI	59.2977	R	K.IY#AYPSNITSETGFR.T	1	1	1	203.155	199.452	132.332	145.892	264.437	195.166	136.147	180.016	124.442	125.399	140.867	1847.31	523.358	319.318	296.113	335.229	976.126	526.938	387.846	428.046	124.442	132.071	167.371	4216.86	12.4111	7.57241	7.02211	7.94973	23.1482	12.496	9.19752	10.1508	2.95106	3.13199	3.96908
3462	sp|Q8IUC4|RHPN2_HUMAN	RHPN2	RHPN2_HUMAN Rhophilin-2	639	KISKKLSFLSWGT	33.6572	R	K.KLS#FLSWGTNK.N	0	1	1	201.871	368.825	404.686	306.35	263.781	347.422	328.979	333.99	759.373	656.766	365.522	4337.56	520.05	590.479	905.546	703.926	973.707	938.019	937.175	794.168	759.373	691.712	434.292	8248.45	6.30482	7.15867	10.9784	8.53405	11.8047	11.3721	11.3618	9.62809	9.20626	8.38596	5.26514
1706	sp|Q8TEW0|PARD3_HUMAN	PARD3	PARD3_HUMAN Partitioning defective 3 homolog	1080	QARERDYAEIQDF	1000	R	R.ERDY#AEIQDFHR.T	1	2	2	201.374	208.526	127.016	92.503	55.8031	90.276	72.5548	65.7002	362.466	340.723	237.042	1853.98	518.769	333.845	284.217	212.552	205.988	243.74	206.689	156.223	362.466	358.853	281.64	3164.98	16.3909	10.5481	8.98004	6.71575	6.50835	7.70115	6.5305	4.93599	11.4524	11.3382	8.89862
2800	sp|Q12959-2|DLG1_HUMAN	DLG1	DLG1_HUMAN Isoform 2 of Disks large homolog 1	782	EVDGRDYHFVTSR	97.7479	R	R.DY#HFVTSR.E	1	4	4	200.978	213.485	225.814	234.151	170.764	238.38	254.4	385.153	366.904	300.58	315.776	2906.38	517.748	341.783	505.292	538.028	630.348	643.613	724.718	915.825	366.904	316.574	375.187	5876.02	8.81121	5.81658	8.59923	9.15633	10.7275	10.9532	12.3335	15.5858	6.24409	5.38755	6.38505
863	sp|Q06124|PTN11_HUMAN	PTPN11	PTN11_HUMAN Tyrosine-protein phosphatase non-receptor type 11	62	IQNTGDYYDLYGG	24.437	R	K.IQNTGDY#YDLYGGEK.F	1	1	1	199.453	198.094	195.2	235.805	177.596	127.701	121.546	165.954	153.061	162.439	167.992	1904.84	513.819	317.143	436.79	541.83	655.567	344.786	346.253	394.608	153.061	171.082	199.599	4074.54	12.6105	7.78354	10.72	13.2979	16.0894	8.46197	8.49797	9.68473	3.75652	4.1988	4.89869
1715	sp|Q96F63|CCD97_HUMAN	CCDC97	CCD97_HUMAN Coiled-coil domain-containing protein 97	212	QPPKPGSPGRPAC	29.6669	U	R.TPTHQPPKPGS#PGRPACPLSNLLLQSYEER.E	0	1	1	198.649	211.339	192.84	221.274	217.311	200.79	199.862	232.899	210.538	197.858	162.44	2245.8	511.748	338.348	431.509	508.44	802.17	542.122	569.353	553.791	210.538	208.385	193.002	4869.41	10.5094	6.94844	8.86164	10.4415	16.4737	11.1332	11.6925	11.3729	4.3237	4.27948	3.96356
522	sp|P16885|PLCG2_HUMAN	PLCG2	PLCG2_HUMAN 1-phosphatidylinositol 4,5-bisphosphate phosphodiesterase gamma-2	1217	NNQLFLYDTHQNL	59.2977	U	R.RQEELNNQLFLY#DTHQNLR.N	1	2	2	198.642	177.406	108.826	85.5293	73.1012	85.6606	81.2721	87.3281	259.864	244.435	222.154	1624.22	511.731	284.023	243.515	196.528	269.842	231.279	231.523	207.651	259.864	257.441	263.951	2957.35	17.3037	9.60397	8.23424	6.64542	9.12445	7.82049	7.82873	7.02152	8.78706	8.70513	8.92528
2490	sp|Q96JP5|ZFP91_HUMAN	ZFP91	ZFP91_HUMAN E3 ubiquitin-protein ligase ZFP91	83	PRRRRSSPSARPP	20.1669	R	R.RSS#PSARPPDVPGQQPQAAK.S	0	1	1	198.44	220.136	195.531	153.82	194.864	234.522	234.099	205.311	147.738	140.68	118.042	2043.18	511.211	352.431	437.531	353.445	719.31	633.197	666.886	488.192	147.738	148.166	140.25	4598.36	11.1173	7.66429	9.51494	7.68633	15.6428	13.7701	14.5027	10.6167	3.21284	3.22214	3.05001
860	sp|Q9H792|PEAK1_HUMAN	PEAK1	PEAK1_HUMAN Pseudopodium-enriched atypical kinase 1	1107	NPCSATYSNLGQS	19.8431	U	R.EDGKEDISDPM*DPNPCSATY#SNLGQSR.A	1	1	1	198.275	22.7928	40.958	40.7195	72.5445	45.8988	32.9799	30.1517	114.713	88.2883	58.2824	745.603	510.785	36.4907	91.6498	93.5647	267.786	123.924	93.9509	71.6954	114.713	92.9861	69.248	1566.79	32.6006	2.329	5.84951	5.97173	17.0914	7.90941	5.99638	4.57593	7.3215	5.9348	4.41972
3358	sp|P16070|CD44_HUMAN	CD44	CD44_HUMAN CD44 antigen	706	NGEASKSQEMVHL	1000	R	K.S#QEMVHLVNK.E	0	1	1	198.174	141.938	104.214	69.3128	115.149	131.788	92.3185	69.8971	142.2	115.317	82.8444	1263.15	510.524	227.239	233.195	159.266	425.052	355.82	262.991	166.203	142.2	121.452	98.4311	2702.37	18.8917	8.40888	8.62926	5.89356	15.7289	13.1669	9.73184	6.15025	5.26203	4.49429	3.64239
2204	sp|P55011|S12A2_HUMAN	SLC12A2	S12A2_HUMAN Solute carrier family 12 member 2	956	VVVSVEYSKKSDL	24.437	R	K.DVVVSVEY#SK.K	1	2	2	196.318	254.329	161.164	313.586	99.2279	100.335	99.9284	257.33	336.081	345.38	441.384	2605.06	505.745	407.175	360.63	720.554	366.284	270.899	284.669	611.886	336.081	363.758	524.427	4752.11	10.6425	8.56829	7.58884	15.1628	7.70782	5.7006	5.99038	12.8761	7.07225	7.65466	11.0357
816	sp|P19174-2|PLCG1_HUMAN	PLCG1	PLCG1_HUMAN Isoform 2 of 1-phosphatidylinositol 4,5-bisphosphate phosphodiesterase gamma-1	783	GRNPGFYVEANPM	163.897	R	R.NPGFY#VEANPMPTFK.C	1	10	8	194.008	491.335	308.082	280.801	133.618	264.234	232.828	258.801	1020.23	920.331	894.204	4998.47	499.794	786.614	689.381	645.22	493.231	713.418	663.266	615.381	1020.23	969.301	1062.44	8158.28	6.12621	9.64191	8.45008	7.90878	6.04577	8.74471	8.12998	7.54303	12.5054	11.8812	13.0229
1176	sp|P27361|MK03_HUMAN	MAPK3	MK03_HUMAN Mitogen-activated protein kinase 3	204	TGFLTEYVATRWY	24.2431	R	R.IADPEHDHTGFLT#EY#VATR.W	1	4	4	193.158	902.512	605.004	354.388	89.3975	181.964	148.005	136.208	975.549	739.107	506.785	4832.08	497.603	1444.9	1353.79	814.308	329.996	491.292	421.627	323.879	975.549	778.434	602.134	8033.51	6.19409	17.9859	16.8518	10.1364	4.10775	6.11553	5.24836	4.0316	12.1435	9.68984	7.49528
2651	sp|P17676|CEBPB_HUMAN	CEBPB	CEBPB_HUMAN CCAAT/enhancer-binding protein beta	139	KPAEYGYVSLGRL	20.1669	R	K.KPAEYGY#VSLGR.L	1	1	1	190.949	238.85	154.42	126.219	139.019	103.029	79.4674	83.2518	182.527	192.647	237.453	1727.83	491.914	382.393	345.537	290.024	513.167	278.172	226.381	197.958	182.527	202.897	282.129	3393.1	14.4975	11.2697	10.1835	8.54746	15.1238	8.19818	6.67182	5.83413	5.37937	5.9797	8.31478
3359	sp|P16070|CD44_HUMAN	CD44	CD44_HUMAN CD44 antigen	697	VEDRKPSGLNGEA	22.5294	R	R.KPS#GLNGEASK.S	0	1	1	189.499	321.869	128.718	185.289	370.792	137.417	146.515	145.029	762.239	336.915	335.738	3060.02	488.178	515.304	288.027	425.754	1368.72	371.019	417.381	344.853	762.239	354.842	398.905	5735.22	8.51192	8.9849	5.02207	7.4235	23.8652	6.46913	7.27751	6.01289	13.2905	6.18707	6.95535
1776	sp|Q9P206-2|K1522_HUMAN	KIAA1522	K1522_HUMAN Isoform 2 of Uncharacterized protein KIAA1522	1030	PVARKPSVGVPPP	59.3668	R	R.KPS#VGVPPPASPSYPR.A	0	1	1	189.159	160.229	106.118	88.7672	105.626	89.0677	77.1997	66.0563	217.529	178.933	170.309	1448.99	487.301	256.523	237.455	203.968	389.902	240.478	219.921	157.07	217.529	188.454	202.352	2800.95	17.3977	9.15843	8.47767	7.2821	13.9203	8.58558	7.85166	5.60773	7.76626	6.7282	7.22439
2555	sp|Q05397|FAK1_HUMAN	PTK2	FAK1_HUMAN Focal adhesion kinase 1	861	IGNQHIYQPVGKP	32.218	R	R.EDGSLQGPIGNQHIY#QPVGKPDPAAPPK.K	1	1	1	187.985	57.8024	26.7863	37.7727	45.7475	32.5199	26.4183	29.5236	209.246	151.578	139.953	945.333	484.277	92.5401	59.9385	86.7936	168.869	87.8018	75.2588	70.2017	209.246	159.643	166.284	1660.86	29.1583	5.57183	3.60889	5.22583	10.1676	5.28654	4.53133	4.22684	12.5987	9.61212	10.012
2664	sp|Q15759|MK11_HUMAN	MAPK11	MK11_HUMAN Mitogen-activated protein kinase 11	182	DEEMTGYVATRWY	59.2977	R	R.QADEEM*TGY#VATR.W	1	3	3	186.128	177.314	157.979	126.347	140.066	105.137	64.9412	81.2993	111.578	138.432	133.25	1422.47	479.493	283.875	353.502	290.318	517.03	283.865	185	193.315	111.578	145.798	158.321	3002.09	15.9719	9.4559	11.7752	9.67051	17.2223	9.45557	6.16237	6.43934	3.71667	4.85654	5.27368
2004	sp|Q9UDY2-7|ZO2_HUMAN	TJP2	ZO2_HUMAN Isoform 7 of Tight junction protein ZO-2	1017	DQLRDNSPPPAFK	1000	R	R.DNS#PPPAFKPEPPK.A	0	1	1	186.069	123.687	118.465	80.9998	108.156	111.942	98.4937	89.5075	206.65	153.726	105.529	1383.22	479.341	198.02	265.084	186.12	399.241	302.236	280.582	212.833	206.65	161.906	125.384	2817.4	17.0136	7.02846	9.40884	6.60611	14.1706	10.7275	9.95892	7.55424	7.33478	5.74664	4.45034
1609	sp|O75886|STAM2_HUMAN	STAM2	STAM2_HUMAN Signal transducing adapter molecule 2	371	VNEAPVYSVYSKL	24.437	U	K.LVNEAPVY#SVYSK.L	1	2	2	180.261	287.617	310.506	502.955	91.2732	129.156	218.182	318.697	2582.26	2760.86	2764.77	10146.5	464.38	460.467	694.806	1155.68	336.92	348.715	621.543	757.804	2582.26	2907.76	3284.94	13615.3	3.41072	3.38199	5.10313	8.48813	2.47458	2.5612	4.56504	5.56583	18.9659	21.3566	24.1269
1036	sp|P21333|FLNA_HUMAN	FLNA	FLNA_HUMAN Filamin-A	2152	RRRRAPSVANVGS	42.8692	R	R.RAPS#VANVGSHCDLSLK.I	0	2	2	178.859	252.596	303.872	460.844	190.223	202.136	236.234	244.943	358.33	329.845	344.5	3102.38	460.768	404.4	679.96	1058.92	702.177	545.757	672.967	582.431	358.33	347.395	409.316	6222.42	7.40496	6.49907	10.9276	17.0178	11.2846	8.77081	10.8152	9.3602	5.75869	5.58296	6.57808
1147	sp|Q9NZM3|ITSN2_HUMAN	ITSN2	ITSN2_HUMAN Intersectin-2	968	EEPEALYAAVNKK	1000	R	K.REEPEALY#AAVNK.K	1	2	2	178.219	281.12	146.936	86.5063	55.5626	62.7269	65.5449	62.4581	653.73	707.953	577.418	2878.18	459.119	450.066	328.793	198.773	205.1	169.359	186.72	148.514	653.73	745.623	686.055	4231.85	10.8491	10.6352	7.76947	4.69707	4.84658	4.00201	4.41225	3.50943	15.4478	17.6193	16.2117
3708	sp|P08758|ANXA5_HUMAN	ANXA5	ANXA5_HUMAN Annexin A5	94	SRLYDAYELKHAL	73.3109	R	R.LYDAY#ELK.H	1	1	1	176.426	176.983	139.399	133.665	149.473	118.558	122.473	127.809	188.856	178.289	168.957	1680.89	454.499	283.345	311.926	307.134	551.754	320.099	348.891	303.908	188.856	187.775	200.746	3458.93	13.1399	8.1917	9.01799	8.87943	15.9516	9.25428	10.0867	8.78617	5.45994	5.4287	5.80369
3243	sp|Q8TEW8|PAR3L_HUMAN	PARD3B	PAR3L_HUMAN Partitioning defective 3 homolog B	1000	DHLEGLYAKVNKP	1000	R	R.DHLEGLY#AK.V	1	2	1	175.533	56.4007	32.4349	30.4099	39.0898	25.5404	22.9765	20.0792	144.009	85.1554	69.4021	701.03	452.198	90.296	72.578	69.8754	144.294	68.9576	65.454	47.7448	144.009	89.6864	82.4597	1327.55	34.0625	6.80169	5.46705	5.26347	10.8692	5.19434	4.93043	3.59645	10.8477	6.75577	6.21141
1611	sp|Q96I25|SPF45_HUMAN	RBM17	SPF45_HUMAN Splicing factor 45	222	EQDRPRSPTGPSN	27.0548	R	R.S#PTGPSNSFLANM*GGTVAHK.I	0	3	2	175.114	133.141	118.672	137.681	103.58	187.458	129.395	153.262	240.487	210.457	167.23	1756.48	451.118	213.155	265.546	316.362	382.35	506.126	368.61	364.429	240.487	221.655	198.693	3528.53	12.7849	6.0409	7.52567	8.96584	10.836	14.3438	10.4466	10.3281	6.81549	6.28179	5.63104
1142	sp|Q9Y5K6|CD2AP_HUMAN	CD2AP	CD2AP_HUMAN CD2-associated protein	409	RSSGTVYPKRPEK	30.8348	U	R.SSGTVY#PK.R	1	1	1	171.006	188.149	235.987	167.653	106.873	149.432	162.773	139.57	297.194	252.88	123.038	1994.56	440.536	301.221	528.058	385.231	394.506	403.458	463.697	331.871	297.194	266.336	146.187	3958.3	11.1294	7.60987	13.3405	9.73224	9.96657	10.1927	11.7146	8.3842	7.50813	6.72854	3.69318
2970	sp|P05141|ADT2_HUMAN	SLC25A5	ADT2_HUMAN ADP/ATP translocase 2	195	AAYFGIYDTAKGM	31.2747	U	R.AAYFGIY#DTAK.G	1	2	2	170.059	199.778	168.043	154.517	139.173	150.217	151.376	149.752	258.292	221.633	202.308	1965.15	438.096	319.84	376.022	355.048	513.735	405.579	431.23	356.084	258.292	233.426	240.371	3927.72	11.1539	8.14313	9.57354	9.03954	13.0797	10.3261	10.9791	9.06592	6.57612	5.94304	6.11985
3436	sp|Q8N3F8|MILK1_HUMAN	MICALL1	MILK1_HUMAN MICAL-like protein 1	391	PLPPSSSPGPPSQ	17.0091	U	K.KKPAPLPPSSS#PGPPSQDSR.Q	0	1	1	168.48	107.168	91.9187	66.3788	95.5719	73.853	79.0993	73.7456	94.5305	77.5667	80.3892	1008.7	434.03	171.573	205.682	152.524	352.789	199.399	225.333	175.354	94.5305	81.6939	95.5139	2188.42	19.833	7.84004	9.39865	6.9696	16.1207	9.11154	10.2966	8.0128	4.31957	3.73301	4.36451
3489	sp|Q9H6S3|ES8L2_HUMAN	EPS8L2	ES8L2_HUMAN Epidermal growth factor receptor kinase substrate 8-like protein 2	570	KYWGPASPTHKLP	44.2778	R	K.YWGPAS#PTHK.L	0	1	1	168.36	261.728	329.765	356.869	109.889	219.785	232.126	276.693	351.028	381.151	264.243	2951.64	433.721	419.02	737.9	820.008	405.637	593.406	661.265	657.927	351.028	401.431	313.959	5795.3	7.48401	7.23034	12.7327	14.1495	6.99941	10.2394	11.4104	11.3528	6.05712	6.92684	5.41747
572	sp|Q9Y446|PKP3_HUMAN	PKP3	PKP3_HUMAN Plakophilin-3	84	GTSRGQYHTLQAG	48.8739	R	R.GQY#HTLQAGFSSR.S	1	2	2	167.502	315.746	134.778	110.596	85.0879	97.7603	69.0439	70.0017	540.596	497.189	355.119	2443.42	431.51	505.501	301.587	254.125	314.088	263.947	196.688	166.452	540.596	523.644	421.933	3920.07	11.0077	12.8952	7.69339	6.48266	8.01231	6.73323	5.01745	4.24613	13.7905	13.358	10.7634
795	sp|P42685|FRK_HUMAN	FRK	FRK_HUMAN Tyrosine-protein kinase FRK	46	SQRHGHYFVALFD	137.179	U	R.HGHY#FVALFDYQAR.T	1	2	2	166.004	156.936	155.489	111.631	119.016	167.72	161.764	119.849	185.386	129.537	75.1307	1548.46	427.649	251.25	347.931	256.503	439.328	452.834	460.822	284.978	185.386	136.429	89.2662	3332.38	12.8332	7.53967	10.4409	7.69731	13.1836	13.5889	13.8286	8.5518	5.56317	4.09406	2.67875
3146	sp|P42229|STA5A_HUMAN	STAT5A	STA5A_HUMAN Signal transducer and activator of transcription 5A	682	DEVFSKYYTPVLA	17.0091	R	K.Y#YTPVLAK.A	1	1	1	164.006	149.335	146.383	105.82	79.0418	110.425	110.899	104.204	237.83	211.791	334.67	1754.41	422.505	239.082	327.554	243.153	291.77	298.142	315.922	247.778	237.83	223.06	397.637	3244.43	13.0225	7.369	10.0959	7.49446	8.99295	9.18935	9.73735	7.63703	7.3304	6.87516	12.256
1862	sp|Q9Y2H5|PKHA6_HUMAN	PLEKHA6	PKHA6_HUMAN Pleckstrin homology domain-containing family A member 6	492	PRSEDIYADPAAY	45.026	R	R.SEDIY#ADPAAYVM*R.R	1	2	1	163.897	127.851	58.4992	45.2056	37.1569	36.1074	30.2586	27.2966	214.089	226.188	213.561	1180.11	422.221	204.686	130.901	103.873	137.159	97.4881	86.1987	64.9064	214.089	238.224	253.742	1953.49	21.6137	10.478	6.70089	5.3173	7.02123	4.99047	4.41256	3.32259	10.9593	12.1948	12.9892
3530	sp|Q14444|CAPR1_HUMAN	CAPRIN1	CAPR1_HUMAN Caprin-1	670	GYQRDGYQQNFKR	1000	R	R.DGY#QQNFK.R	1	1	1	162.935	182.853	85.17	97.5695	85.569	66.5116	48.7369	55.7457	205.347	203.321	164.118	1357.88	419.744	292.743	190.581	224.194	315.864	179.578	138.838	132.553	205.347	214.139	194.995	2508.58	16.7324	11.6697	7.59717	8.9371	12.5914	7.15855	5.53454	5.284	8.18578	8.53628	7.77315
2199	sp|P46013|KI67_HUMAN	MKI67	KI67_HUMAN Antigen KI-67	2223	TKIACRSPQPDPV	84.4978	R	K.IACRS#PQPDPVGTPTIFKPQSK.R	0	2	2	162.596	257.308	359.339	481.648	138.964	213.413	260.822	262.296	291.86	329.187	351.294	3108.73	418.872	411.944	804.076	1106.72	512.965	576.204	743.013	623.692	291.86	346.703	417.388	6253.44	6.69826	6.58748	12.8581	17.6978	8.20293	9.21419	11.8817	9.97359	4.66719	5.54419	6.67454
3440	sp|Q04637-9|IF4G1_HUMAN	EIF4G1	IF4G1_HUMAN Isoform 9 of Eukaryotic translation initiation factor 4 gamma 1	1238	AALPPVSPLKAAL	1000	R	K.REAALPPVS#PLK.A	0	1	1	161.94	201.754	291.418	333.484	86.6157	126.201	145.528	141.006	229.201	241.157	282.501	2240.81	417.18	323.003	652.092	766.276	319.728	340.736	414.571	335.287	229.201	253.989	335.652	4387.71	9.50792	7.36153	14.8618	17.4641	7.2869	7.76567	9.44845	7.64149	5.2237	5.78864	7.64981
2823	sp|P19634|SL9A1_HUMAN	SLC9A1	SL9A1_HUMAN Sodium/hydrogen exchanger 1	683	EQKINNYLTVPAH	44.2778	R	K.INNY#LTVPAHK.L	1	1	1	161.046	311.384	181.119	132.723	96.5375	136.928	105.07	106.334	313.816	302.83	252.696	2100.48	414.878	498.518	405.28	304.969	356.353	369.698	299.317	252.842	313.816	318.943	300.239	3834.85	10.8186	12.9997	10.5683	7.95255	9.29247	9.64047	7.80518	6.59327	8.18327	8.31696	7.82922
3333	sp|O00401|WASL_HUMAN	WASL	WASL_HUMAN Neural Wiskott-Aldrich syndrome protein	256	ETSKVIYDFIEKT	1000	U	K.VIY#DFIEK.T	1	4	3	157.975	147.226	86.7419	92.1574	95.6451	61.2324	55.8101	64.1033	230.643	211.291	428.57	1631.39	406.967	235.705	194.098	211.758	353.059	165.324	158.988	152.426	230.643	222.533	509.202	2840.7	14.3263	8.29741	6.83275	7.45442	12.4286	5.81982	5.59678	5.36579	8.11923	7.83373	17.9252
3297	sp|P13797|PLST_HUMAN	PLS3	PLST_HUMAN Plastin-3	127	YSEEEKYAFVNWI	1000	R	K.Y#AFVNWINK.A	1	2	2	157.179	160.095	145.952	155.236	145.735	129.886	140.058	138.981	182.825	172.324	134.514	1662.78	404.915	256.308	326.59	356.699	537.958	350.685	398.989	330.471	182.825	181.493	159.822	3486.75	11.6129	7.35089	9.3666	10.2301	15.4286	10.0576	11.443	9.4779	5.24341	5.20522	4.5837
2274	sp|O15551|CLD3_HUMAN	CLDN3	CLD3_HUMAN Claudin-3	214	ASLGTGYDRKDYV	30.8348	U	R.STGPGASLGTGY#DR.K	1	2	2	156.491	324.699	188.599	229.739	85.1498	146.516	115.526	227.186	299.427	321.449	245.19	2339.97	403.144	519.834	422.019	527.892	314.317	395.584	329.102	540.208	299.427	338.553	291.321	4381.4	9.20127	11.8646	9.63205	12.0485	7.17389	9.02871	7.51133	12.3296	6.83405	7.72706	6.64904
876	sp|Q8IYB3|SRRM1_HUMAN	SRRM1	SRRM1_HUMAN Serine/arginine repetitive matrix protein 1	260	PEPKEPSPEKNSK	1000	R	K.VPKPEPIPEPKEPS#PEK.N	0	1	1	155.741	198.201	187.061	184.753	203.852	146.185	205.77	216.57	232.871	240.351	196.624	2167.98	401.211	317.315	418.578	424.522	752.489	394.692	586.183	514.965	232.871	253.14	233.618	4529.58	8.85757	7.00539	9.24097	9.37222	16.6128	8.71365	12.9412	11.3689	5.14112	5.58859	5.1576
2105	sp|Q7KZF4|SND1_HUMAN	SND1	SND1_HUMAN Staphylococcal nuclease domain-containing protein 1	908	DADEFGYSRxxxx	24.437	U	R.ADDADEFGY#SR.-	1	3	3	155.578	452.458	248.522	287.876	120.823	196.588	180.997	246.101	686.884	841.413	967.004	4384.24	400.791	724.373	556.106	661.479	445.998	530.777	515.612	585.183	686.884	886.183	1148.94	7142.33	5.61148	10.142	7.78606	9.26139	6.24443	7.43143	7.2191	8.19318	9.6171	12.4075	16.0864
2775	sp|O75533|SF3B1_HUMAN	SF3B1	SF3B1_HUMAN Splicing factor 3B subunit 1	426	GYVPIRTPARKLT	49.5899	U	K.VLPPPAGYVPIRT#PAR.K	0	2	2	153.338	156.682	149.257	154.408	101.709	122.722	111.89	135.02	216.029	196.198	238.28	1735.53	395.02	250.844	333.986	354.797	375.441	331.343	318.743	321.053	216.029	206.637	283.111	3387	11.6628	7.40608	9.8608	10.4752	11.0848	9.78276	9.41078	9.47897	6.37817	6.10088	8.35875
1008	sp|Q09666|AHNK_HUMAN	AHNAK	AHNK_HUMAN Neuroblast differentiation-associated protein AHNAK	715	TKVKGEYDVTVPK	73.3109	U	K.VKGEY#DVTVPK.L	1	6	6	152.905	2468.16	1064.34	804.658	162.198	813.273	599.335	651.908	3138.4	2867.55	1815.86	14538.6	393.905	3951.46	2381.62	1848.93	598.727	2195.79	1707.35	1550.12	3138.4	3020.13	2157.51	22943.9	1.71681	17.2223	10.3802	8.05848	2.60952	9.57025	7.44138	6.75612	13.6786	13.1631	9.40339
2809	sp|Q9NRW7|VPS45_HUMAN	VPS45	VPS45_HUMAN Vacuolar protein sorting-associated protein 45	318	KAFVENYPQFKKM	1000	R	K.AFVENY#PQFK.K	1	3	3	152.902	166.363	177.513	327.155	93.9089	140.793	178.677	494.283	539.54	553.606	670.44	3495.18	393.897	266.343	397.213	751.733	346.65	380.134	509.004	1175.31	539.54	583.063	796.58	6139.47	6.41582	4.33821	6.46983	12.2443	5.64624	6.19163	8.29069	19.1436	8.78806	9.49695	12.9747
1916	sp|Q9UNZ2-5|NSF1C_HUMAN	NSFL1C	NSF1C_HUMAN Isoform 3 of NSFL1 cofactor p47	169	PEEESAYVAGEKR	31.2747	R	R.LGAAPEEESAY#VAGEK.R	1	2	2	150.81	386.862	226.594	257.948	76.9647	141.912	118.147	192.124	426.976	665.43	715.482	3359.25	388.508	619.355	507.039	592.71	284.103	383.154	336.568	456.836	426.976	700.837	850.095	5546.18	7.00497	11.1672	9.14213	10.6868	5.12249	6.90843	6.06846	8.23695	7.69855	12.6364	15.3276
3231	sp|Q14680|MELK_HUMAN	MELK	MELK_HUMAN Maternal embryonic leucine zipper kinase	438	AVKNEEYFMFPEP	1000	R	K.NEEY#FM*FPEPK.T	1	5	3	149.811	217.585	180.538	139.716	88.8208	123.008	129.964	142.608	439.094	427.078	344.622	2382.85	385.936	348.348	403.981	321.038	327.868	332.114	370.234	339.096	439.094	449.802	409.46	4126.97	9.35155	8.44077	9.78881	7.77903	7.94452	8.04739	8.97107	8.21658	10.6396	10.8991	9.92157
818	sp|P19174-2|PLCG1_HUMAN	PLCG1	PLCG1_HUMAN Isoform 2 of 1-phosphatidylinositol 4,5-bisphosphate phosphodiesterase gamma-1	977	GTERACYRDMSSF	49.5899	R	R.ACY#RDM*SSFPETK.A	1	2	2	147.992	161.21	161.879	251.223	135.461	180.863	234.159	422.493	431.539	425.381	497.181	3049.38	381.25	258.093	362.23	577.258	500.033	488.32	667.056	1004.61	431.539	448.015	590.723	5709.13	6.6779	4.5207	6.34475	10.1111	8.75848	8.55332	11.684	17.5966	7.55876	7.84734	10.347
36	sp|O60716|CTND1_HUMAN	CTNND1	CTND1_HUMAN Catenin delta-1	280	RFHPEPYGLEDDQ	1000	R	R.FHPEPY#GLEDDQR.S	1	5	5	147.424	431.658	234.735	183.82	101.782	193.3	176.702	212.528	804.748	766.469	491.451	3744.62	379.785	691.074	525.255	422.379	375.711	521.9	503.376	505.353	804.748	807.252	583.915	6120.75	6.20487	11.2907	8.58155	6.90078	6.13832	8.52673	8.22409	8.2564	13.1479	13.1888	9.53993
2258	sp|Q9UQ35|SRRM2_HUMAN	SRRM2	SRRM2_HUMAN Serine/arginine repetitive matrix protein 2	2581	ALKRVPSPTPAPK	20.1669	R	K.RVPS#PTPAPK.E	0	1	1	146.235	147.021	155.219	128.961	135.951	170.796	186.238	162.474	161.537	151.853	139.773	1686.06	376.723	235.378	347.327	296.324	501.843	461.14	530.541	386.333	161.537	159.933	166.07	3623.15	10.3977	6.49649	9.58634	8.17864	13.851	12.7276	14.6431	10.6629	4.45846	4.41421	4.58359
1483	sp|O14964|HGS_HUMAN	HGS	HGS_HUMAN Hepatocyte growth factor-regulated tyrosine kinase substrate	132	KVVQDTYQIMKVE	30.8348	R	K.VVQDTY#QIMK.V	1	3	3	145.864	146.202	141.448	427.008	137.79	132.624	181.268	833.436	439.511	414.138	1227.49	4226.78	375.767	234.066	316.512	981.174	508.631	358.078	516.385	1981.76	439.511	436.174	1458.43	7606.49	4.94009	3.07719	4.16108	12.8992	6.6868	4.70753	6.78874	26.0535	5.77811	5.73424	19.1735
3478	sp|Q6WCQ1-2|MPRIP_HUMAN	MPRIP	MPRIP_HUMAN Isoform 2 of Myosin phosphatase Rho-interacting protein	450	YPVQRNYGFQIHT	73.6163	R	R.NY#GFQIHTK.D	1	1	1	145.473	123.197	122.842	99.561	114.365	121.413	122.17	132.592	157.627	134.844	103.818	1377.9	374.76	197.235	274.879	228.77	422.16	327.809	348.03	315.281	157.627	142.019	123.351	2911.92	12.8699	6.77338	9.43977	7.85633	14.4976	11.2575	11.9519	10.8272	5.41317	4.87715	4.23607
1788	sp|Q5T5P2|SKT_HUMAN	KIAA1217	SKT_HUMAN Sickle tail protein homolog	1044	EKLGGKSPPPPPP	1000	R	K.LGGKS#PPPPPPPPRR.S	0	1	1	145.35	140.288	135.846	191.687	113.829	135.098	140.698	139.285	194.721	190.169	204.058	1731.03	374.442	224.598	303.976	440.456	420.18	364.758	400.811	331.194	194.721	200.288	242.45	3497.87	10.7048	6.42098	8.69029	12.5921	12.0124	10.428	11.4587	9.46844	5.56683	5.72599	6.93136
1492	sp|P37802|TAGL2_HUMAN	TAGLN2	TAGL2_HUMAN Transgelin-2	192	QAGMTGYGMPRQI	76.7327	R	R.GASQAGMTGY#GM*PR.Q	1	16	7	143.656	290.255	183.991	182.342	115.421	131.121	120.388	124.525	441.596	444.928	390.165	2568.39	370.08	464.69	411.709	418.983	426.057	354.02	342.954	296.097	441.596	468.602	463.573	4458.36	8.3008	10.4229	9.23453	9.39768	9.55636	7.94059	7.69239	6.64139	9.9049	10.5106	10.3978
449	sp|Q16625|OCLN_HUMAN	OCLN	OCLN_HUMAN Occludin	368	DFRQPRYSSGGNF	48.8739	R	R.Y#SSGGNFETPSK.R	1	2	2	143.649	525.987	235.078	311.484	97.4868	203.093	194.279	319.686	907.765	1033.33	777.962	4749.79	370.06	842.091	526.023	715.725	359.857	548.341	553.448	760.155	907.765	1088.31	924.331	7596.1	4.8717	11.0858	6.92491	9.42227	4.73739	7.21871	7.28595	10.0072	11.9504	14.3272	12.1685
1371	sp|Q99959|PKP2_HUMAN	PKP2	PKP2_HUMAN Plakophilin-2	631	KYSQNIYIQNRNI	99.2279	R	K.YSQNIY#IQNR.N	1	2	2	142.86	210.676	152.457	133.544	102.39	128.308	112.517	123.608	337.14	310.898	254.508	2008.91	368.027	337.286	341.145	306.855	377.958	346.423	320.532	293.918	337.14	327.44	302.392	3659.12	10.0578	9.2177	9.32316	8.38604	10.3292	9.4674	8.75982	8.03247	9.21368	8.94862	8.26408
1426	sp|Q63HR2-4|TENC1_HUMAN	TENC1	TENC1_HUMAN Isoform 4 of Tensin-like C1 domain-containing phosphatase	493	PLDGSPYAQVQRP	20.1669	R	R.GPLDGSPY#AQVQRPPR.Q	1	1	1	140.23	130.311	82.4193	78.3865	106.463	70.3821	57.0714	66.5093	154.574	164.27	133.595	1184.21	361.254	208.624	184.426	180.116	392.991	190.028	162.581	158.147	154.574	173.011	158.73	2324.48	15.5413	8.97509	7.93406	7.74863	16.9066	8.17507	6.99429	6.80355	6.64982	7.443	6.82863
877	sp|Q8IYB3|SRRM1_HUMAN	SRRM1	SRRM1_HUMAN Serine/arginine repetitive matrix protein 1	616	PKRRTASPPPPPK	30.8348	R	R.TAS#PPPPPK.R	0	1	1	140.133	138.898	163.264	123.496	151.727	171.202	174.797	163.575	182.358	138.975	101.299	1649.72	361.002	222.373	365.329	283.768	560.076	462.235	497.951	388.952	182.358	146.37	120.358	3590.77	10.0536	6.1929	10.1741	7.90269	15.5977	12.8729	13.8675	10.832	5.07852	4.07627	3.35188
1616	sp|Q92625|ANS1A_HUMAN	ANKS1A	ANS1A_HUMAN Ankyrin repeat and SAM domain-containing protein 1A	455	EEDEHPYELLLTA	97.5963	U	R.EEDEHPY#ELLLTAETK.K	1	1	1	139.856	141.337	86.41	74.7662	65.3123	87.1879	72.7466	56.2564	256.192	217.47	145.987	1343.52	360.288	226.277	193.356	171.797	241.09	235.402	207.236	133.767	256.192	229.042	173.453	2427.9	14.8395	9.31987	7.9639	7.07594	9.92997	9.69572	8.53559	5.5096	10.552	9.43373	7.14417
3350	sp|P30086|PEBP1_HUMAN	PEBP1	PEBP1_HUMAN Phosphatidylethanolamine-binding protein 1	181	DYVPKLYEQLSGK	97.7479	U	K.LY#EQLSGK.-	1	2	2	139.153	404.41	384.309	336.947	112.687	369.313	327.234	474.665	963.62	968.125	647.506	5127.97	358.478	647.45	859.95	774.232	415.965	997.125	932.202	1128.67	963.62	1019.64	769.331	8866.66	4.04299	7.30207	9.6987	8.73194	4.69134	11.2458	10.5136	12.7293	10.8679	11.4997	8.67668
964	sp|Q96J84-2|KIRR1_HUMAN	KIRREL	KIRR1_HUMAN Isoform 2 of Kin of IRRE-like protein 1	638	SSRAVLYADYRAP	37.5398	R	R.AVLY#ADYR.A	1	1	1	138.59	114.627	69.34	66.4308	56.0701	63.6117	55.7114	51.831	208.569	217.573	216.554	1258.91	357.028	183.515	155.159	152.644	206.974	171.748	158.707	123.245	208.569	229.15	257.298	2204.04	16.1988	8.32631	7.03976	6.92565	9.39067	7.79244	7.20074	5.59178	9.46307	10.3968	11.6739
1164	sp|Q15464|SHB_HUMAN	SHB	SHB_HUMAN SH2 domain-containing adapter protein B	96	RDFEDPYNGPGSS	22.4917	R	R.DFEDPY#NGPGSSLRK.L	1	1	1	137.738	142.146	104.361	74.4825	100.972	102.288	106.656	75.4752	181.812	141.821	142.023	1309.78	354.833	227.572	233.525	171.145	372.724	276.171	303.834	179.466	181.812	149.368	168.744	2619.19	13.5474	8.68864	8.9159	6.53426	14.2305	10.5441	11.6003	6.85197	6.94152	5.70281	6.4426
2557	sp|Q05397|FAK1_HUMAN	PTK2	FAK1_HUMAN Focal adhesion kinase 1	575	RYMEDSTYYKASK	17.0091	R	R.YM*EDST#YYK.A	0	1	1	137.397	100.691	82.1177	89.9363	68.2856	65.8253	69.8023	69.7973	165.761	148.944	118.801	1117.36	353.954	161.203	183.751	206.654	252.065	177.725	198.848	165.966	165.761	156.869	141.153	2163.95	16.3569	7.4495	8.49146	9.54987	11.6484	8.21298	9.18913	7.66957	7.6601	7.24919	6.52293
1898	sp|O95490-6|LPHN2_HUMAN	LPHN2	LPHN2_HUMAN Isoform 6 of Latrophilin-2	1421	SENEDIYYKSMPN	30.8348	R	R.SENEDIY#YK.S	1	3	3	136.493	529.781	293.04	198.984	95.4928	234.658	190.521	221.956	895.666	720.428	519.674	4036.7	351.626	848.166	655.723	457.224	352.496	633.564	542.745	527.771	895.666	758.761	617.447	6641.19	5.29462	12.7713	9.87358	6.88467	5.30773	9.53992	8.1724	7.94694	13.4865	11.4251	9.29724
1072	sp|O95297|MPZL1_HUMAN	MPZL1	MPZL1_HUMAN Myelin protein zero-like protein 1	241	HQGPVIYAQLDHS	78.6155	R	K.SLPSGSHQGPVIY#AQLDHSGGHHSDK.I	1	2	2	136.18	177.006	111.281	144.112	46.745	53.2849	48.8841	57.781	234.518	289.462	319.568	1618.82	350.82	283.382	249.008	331.139	172.552	143.866	139.258	137.393	234.518	304.864	379.693	2726.49	12.8671	10.3936	9.13291	12.1452	6.32871	5.2766	5.10757	5.03918	8.60145	11.1815	13.9261
720	sp|Q86X29|LSR_HUMAN	LSR	LSR_HUMAN Lipolysis-stimulated lipoprotein receptor	407	SMRVLYYMEKELA	24.437	R	R.VLYY#M*EK.E	1	1	1	136.175	302.441	167.273	166.952	73.3285	117.572	124.908	151.906	436.619	395.64	429.435	2502.25	350.808	484.2	374.299	383.62	270.68	317.439	355.828	361.205	436.619	416.691	510.231	4261.62	8.2318	11.3619	8.78303	9.00174	6.35158	7.44878	8.3496	8.47576	10.2454	9.77776	11.9727
2708	sp|P53779|MK10_HUMAN	MAPK10	MK10_HUMAN Mitogen-activated protein kinase 10	223	SFMMTPYVVTRYY	35.7774	R	R.TAGTSFM*M*TPY#VVTR.Y	1	2	2	136.045	140.782	125.856	138.049	106.773	103.138	104.864	124.596	236.345	188.302	176.417	1581.17	350.471	225.388	281.622	317.208	394.134	278.467	298.73	296.268	236.345	198.322	209.608	3086.56	11.3547	7.30224	9.12413	10.2771	12.7693	9.02192	9.67841	9.59863	7.65721	6.42533	6.791
548	sp|Q9HBL0|TENS1_HUMAN	TNS1	TENS1_HUMAN Tensin-1	366	PLDGSLYAKVKKK	37.5398	R	R.DDGMEEVVGHTQGPLDGSLY#AK.V	1	2	1	135.984	115.548	98.2628	141.443	96.0398	122.762	130.428	247.797	248.67	243.462	241.84	1822.24	350.315	184.99	219.878	325.005	354.515	331.45	371.556	589.216	248.67	256.416	287.341	3519.35	9.95396	5.25637	6.24769	9.23481	10.0733	9.41793	10.5575	16.7422	7.06578	7.28589	8.16459
2278	sp|Q9UIQ6|LCAP_HUMAN	LNPEP	LCAP_HUMAN Leucyl-cystinyl aminopeptidase	46	EPDEVEYEPRGSR	1000	R	K.EPCLHPLEPDEVEY#EPR.G	1	3	3	135.499	179.598	153.731	174.525	111.112	123.828	148.877	177.715	350.547	373.991	412.735	2342.16	349.066	287.532	343.997	401.021	410.154	334.328	424.112	422.574	350.547	393.89	490.388	4207.61	8.29607	6.83361	8.1756	9.53085	9.7479	7.94578	10.0796	10.0431	8.33127	9.36138	11.6548
9	sp|P68363|TBA1B_HUMAN	TUBA1B	TBA1B_HUMAN Tubulin alpha-1B chain	272	HFPLATYAPVISA	30.8348	R	R.IHFPLATY#APVISAEK.A	1	2	2	135.052	91.4046	49.6532	56.2072	93.6101	46.401	35.7773	64.0554	121.939	144.897	128.903	967.9	347.914	146.336	111.107	129.152	345.547	125.28	101.92	152.312	121.939	152.607	153.155	1887.27	18.4348	7.75387	5.88716	6.84334	18.3093	6.63817	5.4004	8.0705	6.46114	8.08614	8.11516
683	sp|P49023-3|PAXI_HUMAN	PXN	PAXI_HUMAN Isoform Gamma of Paxillin	88	QSSSPVYGSSAKT	31.2747	R	R.FIHQQPQSSSPVY#GSSAK.T	1	1	1	135.028	74.017	33.6904	41.3969	56.2377	26.0882	28.1941	27.5922	213.275	205.19	223.846	1064.56	347.852	118.499	75.3874	95.1212	207.592	70.4368	80.3176	65.6092	213.275	216.108	265.961	1756.16	19.8075	6.74764	4.29274	5.41643	11.8208	4.01084	4.57348	3.73595	12.1444	12.3057	15.1445
2349	sp|P55196-5|AFAD_HUMAN	MLLT4	AFAD_HUMAN Isoform 5 of Afadin	1496	ERRDLQYITVSKE	76.7327	R	R.DLQY#ITVSK.E	1	2	2	133.659	606.043	227.874	152.888	77.7605	146.139	130.715	130.316	1402.02	1302.99	900.777	5211.19	344.325	970.259	509.904	351.305	287.04	394.566	372.373	309.867	1402.02	1372.32	1070.25	7384.24	4.66298	13.1396	6.9053	4.75749	3.8872	5.34336	5.0428	4.19634	18.9867	18.5845	14.4938
629	sp|Q99569|PKP4_HUMAN	PKP4	PKP4_HUMAN Plakophilin-4	1115	LQHQQLYYSQDDS	48.8739	R	R.LQHQQLY#YSQDDSNRK.N	1	3	3	133.631	303.139	156.528	115.348	62.7087	105.616	88.3488	82.0072	642.591	677.522	505.084	2872.52	344.254	485.318	350.255	265.045	231.479	285.157	251.682	194.998	642.591	713.572	600.113	4364.46	7.88765	11.1198	8.02514	6.0728	5.30372	6.53361	5.76662	4.46786	14.7232	16.3496	13.75
2642	sp|Q9UPX8-3|SHAN2_HUMAN	SHANK2	SHAN2_HUMAN Isoform 3 of SH3 and multiple ankyrin repeat domains protein 2	34	SKEETIYDTIRAT	30.8348	R	K.EETIY#DTIR.A	1	1	1	133.381	150.53	88.7743	80.631	55.9132	65.1883	53.9323	58.1264	263.485	182.121	193.731	1325.81	343.609	240.994	198.646	185.273	206.395	176.005	153.639	138.214	263.485	191.811	230.181	2328.25	14.7582	10.3509	8.53199	7.9576	8.8648	7.55953	6.59889	5.93639	11.3169	8.23844	9.88642
2330	sp|Q12955|ANK3_HUMAN	ANK3	ANK3_HUMAN Ankyrin-3	883	TGDTDKYLGPQDL	1000	R	K.Y#LGPQDLK.E	1	1	1	133.27	322.085	152.581	139.242	69.6732	116.323	93.2045	118.979	317.41	325.077	356.486	2144.33	343.323	515.649	341.423	319.948	257.187	314.065	265.515	282.91	317.41	342.374	423.556	3723.36	9.22078	13.849	9.16975	8.593	6.90739	8.435	7.13105	7.59825	8.52481	9.1953	11.3756
1103	sp|Q13480-2|GAB1_HUMAN	GAB1	GAB1_HUMAN Isoform 2 of GRB2-associated-binding protein 1	259	SVDSSLYNLPRSY	59.2977	R	R.APSASVDSSLY#NLPR.S	1	2	2	133.257	186.316	95.1333	70.5875	31.373	85.5894	69.1298	59.7903	426.876	358.311	233.709	1750.07	343.289	298.287	212.875	162.195	115.808	231.087	196.932	142.171	426.876	377.377	277.68	2784.58	12.3282	10.7121	7.64479	5.82477	4.15892	8.29881	7.07225	5.10565	15.33	13.5524	9.97208
2275	sp|O15551|CLD3_HUMAN	CLDN3	CLD3_HUMAN Claudin-3	198	TATKVVYSAPRST	24.437	U	K.VVY#SAPR.S	1	1	1	132.907	58.3221	49.9895	50.6998	76.4526	39.5115	38.1739	46.7948	79.9713	69.3584	90.355	732.536	342.388	93.3722	111.859	116.497	282.213	106.679	108.747	111.27	79.9713	73.0489	107.355	1533.4	22.3287	6.08922	7.29485	7.59733	18.4044	6.95702	7.0919	7.25639	5.21529	4.76385	7.00109
2114	sp|Q8IZ21-2|PHAR4_HUMAN	PHACTR4	PHAR4_HUMAN Isoform 2 of Phosphatase and actin regulator 4	657	ILRFNEYVEVTDA	47.0452	R	R.FNEY#VEVTDAQDYDRR.A	1	3	3	132.523	119.933	102.562	90.5368	73.2176	81.8955	76.9558	81.3163	189.788	176.284	184.509	1309.52	341.398	192.009	229.498	208.034	270.271	221.113	219.227	193.356	189.788	185.664	219.224	2469.58	13.8241	7.77495	9.293	8.42387	10.944	8.95348	8.87708	7.82949	7.68502	7.51803	8.87695
698	sp|Q14247-2|SRC8_HUMAN	CTTN	SRC8_HUMAN Isoform 2 of Src substrate cortactin	154	HASQKDYSSGFGG	24.437	R	K.DY#SSGFGGK.Y	1	1	1	132.196	515.627	292.578	259.188	68.3238	195	158.246	202.293	587.213	561.298	495.869	3467.83	340.557	825.505	654.689	595.559	252.206	526.488	450.8	481.017	587.213	591.164	589.164	5894.36	5.77767	14.005	11.107	10.1039	4.27877	8.93206	7.64799	8.16062	9.96228	10.0293	9.99539
1044	sp|P67870|CSK2B_HUMAN	CSNK2B	CSK2B_HUMAN Casein kinase II subunit beta	209	AASNFKSPVKTIR	64.3979	R	K.IHPMAYQLQLQAASNFKS#PVK.T	0	2	2	130.472	155.002	131.267	137.719	105.701	127.81	155.538	142.782	192.826	182.228	144.353	1605.7	336.116	248.154	293.73	316.449	390.177	345.08	443.087	339.511	192.826	191.924	171.512	3268.57	10.2833	7.59213	8.98651	9.68157	11.9373	10.5575	13.556	10.3871	5.89941	5.8718	5.24732
799	sp|P42685|FRK_HUMAN	FRK	FRK_HUMAN Tyrosine-protein kinase FRK	497	FETDSSYSDANNF	17.0091	R	K.LEDYFETDSSY#SDANNFIR.-	1	7	5	130.136	189.59	149.221	144.468	91.3748	127.258	103.167	126.557	280.982	250.044	238.426	1831.22	335.25	303.528	333.905	331.957	337.295	343.59	293.895	300.929	280.982	263.348	283.285	3407.96	9.83725	8.90643	9.79779	9.74063	9.89727	10.082	8.62376	8.83016	8.24486	7.72744	8.31243
2381	sp|O75369-8|FLNB_HUMAN	FLNB	FLNB_HUMAN Isoform 8 of Filamin-B	651	PDLVRAYGPGLEK	1000	R	R.AY#GPGLEK.S	1	1	1	129.346	106.349	111.308	89.738	81.8324	92.2022	106.21	95.4756	168.734	162.882	120.094	1264.17	333.215	170.262	249.068	206.199	302.071	248.941	302.565	227.024	168.734	171.548	142.689	2522.31	13.2107	6.75022	9.87458	8.17498	11.976	9.86954	11.9955	9.00061	6.68963	6.80123	5.65705
41	sp|O60716|CTND1_HUMAN	CTNND1	CTND1_HUMAN Catenin delta-1	865	SQSSHSYDDSTLP	33.6572	R	R.SQSSHSY#DDSTLPLIDR.N	1	2	2	129.311	178.108	114.235	108.54	72.2552	98.5414	86.5557	89.1315	220.007	215.18	207.946	1519.81	333.124	285.146	255.617	249.402	266.719	266.056	246.574	211.939	220.007	226.63	247.07	2808.28	11.8622	10.1537	9.10226	8.88093	9.49757	9.47399	8.78024	7.54691	7.83422	8.07005	8.7979
2979	sp|Q7L2J0|MEPCE_HUMAN	MEPCE	MEPCE_HUMAN 7SK snRNA methylphosphate capping enzyme	152	GGKRRNSCNVGGG	1000	U	R.RNS#CNVGGGGGGFK.H	0	1	1	128.919	98.8878	66.7209	49.9952	24.3299	34.8064	29.0834	31.9742	178.434	155.227	121.517	919.894	332.114	158.317	149.298	114.878	89.8099	93.9754	82.8507	76.0289	178.434	163.487	144.379	1583.57	20.9725	9.99745	9.42794	7.25438	5.67135	5.93439	5.23189	4.8011	11.2678	10.3239	9.11732
3304	sp|P08621|RU17_HUMAN	SNRNP70	RU17_HUMAN U1 small nuclear ribonucleoprotein 70 kDa	126	RREFEVYGPIKRI	1000	R	R.EFEVY#GPIK.R	1	2	2	128.172	181.202	169.397	138.601	127.195	148.955	159.006	162.56	270.438	207.636	223.768	1916.93	330.19	290.1	379.051	318.475	469.521	402.171	452.966	386.539	270.438	218.684	265.868	3784	8.72595	7.66649	10.0172	8.41635	12.4081	10.6282	11.9705	10.2151	7.14687	5.77916	7.02612
2660	sp|Q9Y508|RN114_HUMAN	RNF114	RN114_HUMAN RING finger protein 114	116	CSKYQNYIMEGVK	53.5337	R	K.YQNY#IMEGVK.A	1	3	3	128.098	313.656	237.648	204.145	84.2925	158.907	133.376	176.368	672.938	710.552	401.792	3221.77	329.998	502.155	531.773	469.082	311.152	429.041	379.953	419.372	672.938	748.36	477.386	5271.21	6.26039	9.52636	10.0882	8.89895	5.90286	8.13933	7.20808	7.9559	12.7663	14.1971	9.05649
2259	sp|Q9UQ35|SRRM2_HUMAN	SRRM2	SRRM2_HUMAN Serine/arginine repetitive matrix protein 2	1014	SLSGSKSPCPQEK	20.1669	R	K.AQTPPGPSLSGSKS#PCPQEK.S	0	2	1	128.086	126.028	93.8632	54.1799	94.4313	107.987	105.935	68.6937	162.592	188.091	146.682	1276.57	329.97	201.768	210.033	124.494	348.578	291.56	301.78	163.341	162.592	198.099	174.279	2506.49	13.1646	8.04982	8.37956	4.96685	13.907	11.6322	12.0399	6.51672	6.48682	7.90344	6.95311
3398	sp|O60825|F262_HUMAN	PFKFB2	F262_HUMAN 6-phosphofructo-2-kinase/fructose-2,6-bisphosphatase 2	466	VRMRRNSFTPLSS	20.1669	R	R.RNS#FTPLSSSNTIR.R	0	1	1	127.98	96.4228	79.5904	69.6252	85.6272	57.3881	48.6609	55.6052	124.286	116.734	93.5981	955.518	329.695	154.37	178.096	159.984	316.079	154.945	138.622	132.219	124.286	122.945	111.208	1922.45	17.1497	8.02988	9.264	8.32188	16.4415	8.05976	7.21069	6.87764	6.465	6.39524	5.78471
2074	sp|Q96RT1-8|LAP2_HUMAN	ERBB2IP	LAP2_HUMAN Isoform 8 of Protein LAP2	1104	QIPEGDYLSYREF	31.2747	R	R.AQIPEGDY#LSYR.E	1	2	2	127.656	128.209	83.49	59.6621	43.777	56.4968	63.1662	54.2319	283.358	243.144	226.438	1369.63	328.861	205.26	186.822	137.091	161.596	152.538	179.944	128.954	283.358	256.081	269.041	2289.54	14.3636	8.96508	8.15978	5.98769	7.05799	6.66238	7.85936	5.63229	12.3762	11.1848	11.7508
2406	sp|P11413-2|G6PD_HUMAN	G6PD	G6PD_HUMAN Isoform Long of Glucose-6-phosphate 1-dehydrogenase	549	KRVGFQYEGTYKW	33.6572	R	K.RVGFQY#EGTYK.W	1	1	1	126.99	184.442	158.151	177.971	107.319	120.073	111.884	169.744	232.559	237.416	265.199	1891.75	327.145	295.288	353.887	408.939	396.151	324.191	318.727	403.62	232.559	250.049	315.095	3625.65	9.02307	8.1444	9.76064	11.279	10.9263	8.9416	8.79089	11.1323	6.41428	6.89667	8.69071
2962	sp|Q00610|CLH1_HUMAN	CLTC	CLH1_HUMAN Clathrin heavy chain 1	1096	GNLDRAYEFAERC	1000	R	R.AY#EFAER.C	1	1	1	126.533	116.892	129.08	105.431	110.371	116.186	117.018	119.146	138.404	123.64	110.178	1312.88	325.967	187.141	288.836	242.257	407.418	313.696	333.352	283.307	138.404	130.219	130.908	2781.51	11.7191	6.72806	10.3842	8.70958	14.6474	11.2779	11.9846	10.1854	4.97585	4.68161	4.70636
1010	sp|Q09666|AHNK_HUMAN	AHNAK	AHNK_HUMAN Neuroblast differentiation-associated protein AHNAK	964	PKVKGEYDMTVPK	57.7111	U	K.VKGEY#DMTVPK.L	1	4	4	125.414	1877.88	883.927	640.517	105.364	614.219	460.087	496.213	2747.05	2420.55	1538.46	11909.7	323.084	3006.44	1977.92	1471.77	388.935	1658.36	1310.67	1179.91	2747.05	2549.34	1827.92	18441.4	1.75195	16.3027	10.7255	7.98081	2.10903	8.99259	7.1072	6.39814	14.8961	13.824	9.91204
3080	sp|Q92630|DYRK2_HUMAN	DYRK2	DYRK2_HUMAN Dual specificity tyrosine-phosphorylation-regulated kinase 2	382	HQRVYTYIQSRFY	24.437	R	R.VYTY#IQSR.F	1	1	1	124.428	125.521	98.29	107.407	118.563	115.128	124.744	107.397	103.293	92.3557	81.1474	1198.27	320.545	200.956	219.939	246.798	437.655	310.839	355.363	255.371	103.293	97.2698	96.4148	2644.44	12.1215	7.59917	8.31702	9.33269	16.55	11.7544	13.4381	9.65689	3.90606	3.67827	3.64594
1255	sp|Q8NI35|INADL_HUMAN	INADL	INADL_HUMAN InaD-like protein	938	SQEAQPYGYCPEN	44.3948	R	R.TVYSQEAQPY#GYCPENVMK.E	1	1	1	123.802	95.685	54.4055	58.0984	46.2953	45.3037	33.4505	46.7937	129.12	151.266	155.618	939.838	318.933	153.189	121.741	133.498	170.892	122.317	95.2917	111.267	129.12	159.314	184.897	1700.46	18.7557	9.0087	7.15928	7.85069	10.0497	7.19319	5.60388	6.54335	7.59325	9.3689	10.8734
2769	sp|P61158|ARP3_HUMAN	ACTR3	ARP3_HUMAN Actin-related protein 3	16	VDCGTGYTKLGYA	24.437	R	R.LPACVVDCGTGY#TK.L	1	2	2	122.372	149.383	128.448	125.868	119.009	116.187	119.249	116.695	130.483	107.024	88.275	1322.99	315.247	239.158	287.421	289.218	439.303	313.698	339.709	277.48	130.483	112.718	104.883	2849.32	11.064	8.39352	10.0874	10.1504	15.4178	11.0096	11.9225	9.73848	4.57946	3.95597	3.681
715	sp|Q86X29|LSR_HUMAN	LSR	LSR_HUMAN Lipolysis-stimulated lipoprotein receptor	551	RSRDPHYDDFRSR	1000	R	R.DPHY#DDFR.S	1	3	3	122.293	222.446	93.5175	99.3485	55.119	78.5376	63.0399	75.1138	320.809	324.76	243.6	1698.58	315.044	356.13	209.26	228.282	203.463	212.047	179.584	178.607	320.809	342.04	289.432	2834.7	11.1139	12.5632	7.38208	8.05313	7.17759	7.48041	6.3352	6.30075	11.3172	12.0662	10.2103
42	sp|O60716|CTND1_HUMAN	CTNND1	CTND1_HUMAN Catenin delta-1	904	KSLDNNYSTPNER	30.8348	R	K.SLDNNY#STPNER.G	1	3	3	121.743	836.008	324.379	227.465	65.7508	247.692	179.985	241.427	966.179	1007.27	863.79	5081.69	313.627	1338.43	725.848	522.666	242.708	668.754	512.73	574.069	966.179	1060.86	1026.31	7952.18	3.94391	16.831	9.12766	6.57261	3.0521	8.4097	6.44766	7.21901	12.1499	13.3406	12.906
2743	sp|O94979-8|SC31A_HUMAN	SEC31A	SC31A_HUMAN Isoform 8 of Protein transport protein Sec31A	799	PVAGHESPKIPYE	31.9355	R	R.AQGEPVAGHES#PKIPYEK.Q	0	1	1	121.702	163.736	156.354	111.676	118.719	115.36	120.61	95.5476	195.708	170.346	117.092	1486.85	313.522	262.138	349.866	256.607	438.231	311.465	343.586	227.195	195.708	179.41	139.122	3016.85	10.3924	8.68912	11.5971	8.50578	14.5261	10.3242	11.3889	7.53087	6.48716	5.94693	4.61151
2730	sp|Q9H422|HIPK3_HUMAN	HIPK3	HIPK3_HUMAN Homeodomain-interacting protein kinase 3	359	KTVCSTYLQSRYY	48.8739	R	K.TVCSTY#LQSR.Y	1	1	1	121.109	78.6862	60.7698	40.7611	33.2325	40.333	44.9412	28.5488	69.1577	39.9463	24.5652	582.05	311.993	125.975	135.982	93.6603	122.673	108.897	128.026	67.8839	69.1577	42.0718	29.187	1235.51	25.2523	10.1962	11.0062	7.58073	9.92894	8.81394	10.3622	5.49442	5.59753	3.40523	2.36235
3658	sp|Q15052|ARHG6_HUMAN	ARHGEF6	ARHG6_HUMAN Rho guanine nucleotide exchange factor 6	188	CKGDIIYVTRVEE	48.8739	R	K.GDIIY#VTR.V	1	1	1	120.725	124.624	107.196	143.067	131.322	103.083	102.967	142.161	163.474	171.081	183.774	1493.47	311.006	199.521	239.867	328.737	484.755	278.319	293.325	338.034	163.474	180.184	218.35	3035.57	10.2454	6.57275	7.90186	10.8295	15.9692	9.1686	9.66292	11.1357	5.38527	5.93575	7.19306
2605	sp|Q05519|SRS11_HUMAN	SRSF11	SRS11_HUMAN Serine/arginine-rich splicing factor 11	207	VAAGLVSPSLKSD	44.2778	R	K.LNHVAAGLVS#PSLK.S	0	1	1	120.572	169.495	327.445	422.972	82.7937	156.176	164.432	193.836	330.668	333.566	330.639	2632.59	310.611	271.358	732.708	971.9	305.62	421.667	468.422	460.907	330.668	351.315	392.846	5018.02	6.18991	5.40766	14.6015	19.3682	6.09044	8.40305	9.3348	9.18503	6.58961	7.00106	7.82871
2172	sp|P61619|S61A1_HUMAN	SEC61A1	S61A1_HUMAN Protein transport protein Sec61 subunit alpha isoform 1	276	ARYRGQYNTYPIK	53.5337	R	R.GQY#NTYPIK.L	1	2	2	120.485	153.736	199.634	477.498	112.22	188.484	247.729	753.553	470.222	493.675	725.416	3942.65	310.387	246.128	446.711	1097.19	414.243	508.896	705.713	1791.81	470.222	519.943	861.898	7373.14	4.2097	3.33817	6.05863	14.8809	5.61826	6.90202	9.57141	24.3019	6.3775	7.05185	11.6897
573	sp|Q9Y446|PKP3_HUMAN	PKP3	PKP3_HUMAN Plakophilin-3	176	VGSRADYDTLSLR	48.8739	R	R.ADY#DTLSLR.S	1	2	2	118.772	360.703	205.917	155.64	116.051	205.869	180.122	183.733	659.475	533.354	355.713	3075.35	305.973	577.477	460.771	357.628	428.385	555.836	513.121	436.885	659.475	561.733	422.639	5279.92	5.79503	10.9372	8.72685	6.77335	8.11347	10.5274	9.71834	8.27446	12.4902	10.639	8.00464
2420	sp|P07900-2|HS90A_HUMAN	HSP90AA1	HS90A_HUMAN Isoform 2 of Heat shock protein HSP 90-alpha	406	KKIKEKYIDQEEL	1000	R	K.Y#IDQEELNK.T	1	2	2	118.174	308.07	288.129	318.532	79.2192	265.626	259.782	333.864	672.614	675.334	524.824	3844.17	304.434	493.213	644.733	731.919	292.425	717.175	740.05	793.869	672.614	711.268	623.567	6725.26	4.52672	7.33373	9.58673	10.8831	4.34815	10.6639	11.004	11.8043	10.0013	10.5761	9.27201
797	sp|P42685|FRK_HUMAN	FRK	FRK_HUMAN Tyrosine-protein kinase FRK	132	AEKQLLYSENKTG	48.8739	U	K.QLLY#SENK.T	1	1	1	118.131	207.031	206.344	139.378	105.73	186.181	154.499	157.473	199.117	205.17	135.334	1814.39	304.322	331.451	461.726	320.262	390.285	502.678	440.127	374.443	199.117	216.087	160.797	3701.29	8.22205	8.95501	12.4747	8.6527	10.5445	13.5811	11.8912	10.1166	5.37965	5.83814	4.34433
3529	sp|P49721|PSB2_HUMAN	PSMB2	PSB2_HUMAN Proteasome subunit beta type-2	146	LSILDRYYTPTIS	17.0091	U	R.Y#YTPTISR.E	1	1	1	118.115	127.068	114.25	111.802	105.887	114.959	117.573	140.671	138.112	115.354	96.5696	1300.36	304.282	203.433	255.652	256.898	390.864	310.382	334.934	334.49	138.112	121.492	114.739	2765.28	11.0037	7.3567	9.24506	9.29013	14.1347	11.2243	12.1121	12.0961	4.9945	4.39347	4.14926
616	sp|Q15942|ZYX_HUMAN	ZYX	ZYX_HUMAN Zyxin	267	APAPKFSPVTPKF	16.062	R	R.GPPASSPAPAPKFS#PVTPK.F	0	1	1	116.596	90.4899	70.1279	81.0672	61.2026	58.047	53.3578	58.2696	109.642	122.606	131.993	953.399	300.368	144.872	156.922	186.275	225.92	156.724	152.002	138.555	109.642	129.13	156.827	1857.24	16.1728	7.80041	8.44922	10.0297	12.1643	8.43855	8.18433	7.46026	5.90352	6.95278	8.44412
612	sp|Q00839|HNRPU_HUMAN	HNRNPU	HNRPU_HUMAN Heterogeneous nuclear ribonucleoprotein U	271	KYSRAKSPQPPVE	53.5672	R	K.S#PQPPVEEEDEHFDDTVVCLDTYNCDLHFK.I	0	2	2	116.104	123.072	136.975	154.356	103.09	138.452	128.483	124.367	199.382	221.259	247.61	1693.15	299.1	197.034	306.503	354.678	380.541	373.813	366.012	295.721	199.382	233.031	294.196	3300.01	9.06359	5.97071	9.28795	10.7478	11.5315	11.3276	11.0912	8.96122	6.04184	7.06153	8.91501
1417	sp|Q96BN8|OTUL_HUMAN	FAM105B	OTUL_HUMAN Ubiquitin thioesterase otulin	56	EHEEDMYRAADEI	133.148	U	K.AAASGQPRPEMQCPAEHEEDMY#R.A	1	16	11	115.557	341.522	207.945	219.518	95.6185	152.843	165.096	154.519	797.595	957.42	1023.92	4231.55	297.691	546.767	465.309	504.405	352.96	412.666	470.313	367.417	797.595	1008.36	1216.57	6440.06	4.62249	8.4901	7.22524	7.83231	5.4807	6.40781	7.30294	5.70519	12.3849	15.6577	18.8906
1896	sp|Q13113|PDZ1I_HUMAN	PDZK1IP1	PDZ1I_HUMAN PDZK1-interacting protein 1	83	VGTDGRYSSMAAS	17.0091	U	R.Y#SSM*AASFR.S	1	1	1	113.807	65.441	43.8944	52.448	40.5228	32.1875	29.7867	35.5101	50.0884	55.8936	61.0547	580.634	293.183	104.769	98.2205	120.514	149.584	86.9045	84.8543	84.4365	50.0884	58.8677	72.5418	1203.96	24.3515	8.70203	8.15809	10.0098	12.4242	7.2182	7.04791	7.01321	4.16029	4.88949	6.02524
3441	sp|Q04637-9|IF4G1_HUMAN	EIF4G1	IF4G1_HUMAN Isoform 9 of Eukaryotic translation initiation factor 4 gamma 1	1084	KITKPGSIDSNNQ	20.9846	R	K.ITKPGS#IDSNNQLFAPGGR.L	0	1	1	113.495	110.827	44.8275	46.8082	64.9911	36.1765	33.8451	27.4753	113.176	87.2223	90.1457	768.99	292.38	177.431	100.308	107.555	239.904	97.6744	96.4155	65.3312	113.176	91.8633	107.106	1489.15	19.6341	11.9149	6.73597	7.22261	16.1102	6.55909	6.47455	4.38716	7.60008	6.16886	7.19245
3077	sp|Q6ZVL6|K154L_HUMAN	KIAA1549L	K154L_HUMAN UPF0606 protein KIAA1549L	1417	KAKRKGYYDFPAV	24.437	R	K.GY#YDFPAVETSK.G	1	2	1	113.385	261.122	208.79	226.802	107.226	175.62	154.037	202.182	403.049	393.094	321.235	2566.54	292.097	418.05	467.2	521.142	395.809	474.163	438.811	480.753	403.049	414.01	381.674	4686.76	6.23239	8.91981	9.96851	11.1194	8.44526	10.1171	9.36279	10.2577	8.59974	8.83361	8.14366
344	sp|P46109|CRKL_HUMAN	CRKL	CRKL_HUMAN Crk-like protein	207	PEPAHAYAQPQTT	13.2077	U	R.NSNSYGIPEPAHAY#AQPQTTTPLPAVSGSPGAAITPLPSTQNGPVFAK.A	1	1	1	113.016	173.63	156.586	128.579	81.805	88.2623	78.4609	81.8712	230.566	202.135	118.359	1453.27	291.146	277.977	350.385	295.446	301.97	238.303	223.514	194.675	230.566	212.89	140.627	2757.5	10.5583	10.0808	12.7066	10.7143	10.9509	8.642	8.10568	7.05984	8.36142	7.7204	5.09981
2257	sp|Q9UQ35|SRRM2_HUMAN	SRRM2	SRRM2_HUMAN Serine/arginine repetitive matrix protein 2	1003	PKVKAQTPPGPSL	30.6121	R	K.AQT#PPGPSLSGSK.S	0	2	1	112.87	152.341	150.179	111.804	81.8908	138.103	138.494	146.774	169.414	137.376	109.186	1448.43	290.769	243.894	336.048	256.901	302.287	372.87	394.533	349.002	169.414	144.685	129.729	2990.13	9.72428	8.15662	11.2386	8.59162	10.1095	12.47	13.1945	11.6718	5.66578	4.83876	4.33857
2350	sp|P55196-5|AFAD_HUMAN	MLLT4	AFAD_HUMAN Isoform 5 of Afadin	1229	QTYTREYFTFPAS	30.8348	R	R.EY#FTFPASK.S	1	2	2	112.563	390.227	160.007	117.321	70.035	130.748	98.3255	93.6419	645.586	597.956	504.996	2921.41	289.978	624.743	358.04	269.58	258.523	353.011	280.103	222.664	645.586	629.772	600.008	4532.01	6.39844	13.7851	7.90024	5.94835	5.70438	7.78929	6.18055	4.91314	14.245	13.8961	13.2393
2973	sp|P62136-2|PP1A_HUMAN	PPP1CA	PP1A_HUMAN Isoform 2 of Serine/threonine-protein phosphatase PP1-alpha catalytic subunit	317	DKNKGKYGQFSGL	18.8054	R	K.Y#GQFSGLNPGGRPITPPR.N	1	1	1	111.914	82.7999	57.9059	53.7089	53.9672	41.5769	42.9408	46.5634	114.433	97.6356	111.802	815.248	288.306	132.561	129.573	123.412	199.211	112.255	122.327	110.719	114.433	102.831	132.837	1568.47	18.3814	8.45161	8.26115	7.86831	12.701	7.15701	7.79915	7.05909	7.29585	6.55613	8.46925
2020	sp|O95436|NPT2B_HUMAN	SLC34A2	NPT2B_HUMAN Sodium-dependent phosphate transport protein 2B	17	QPNPDKYLEGAAG	159.652	R	K.Y#LEGAAGQQPTAPDK.S	1	3	2	111.776	404.562	210.286	221.666	77.2846	162.888	161.712	205.559	1058.56	1342.02	1034.09	4990.41	287.95	647.693	470.546	509.34	285.284	439.79	460.675	488.783	1058.56	1413.43	1228.65	7290.7	3.94955	8.88382	6.45406	6.98616	3.91298	6.0322	6.31866	6.7042	14.5193	19.3868	16.8523
10	sp|P68363|TBA1B_HUMAN	TUBA1B	TBA1B_HUMAN Tubulin alpha-1B chain	357	FKVGINYQPPTVV	18.8054	R	K.VGINY#QPPTVVPGGDLAK.V	1	1	1	111.527	141.069	97.2761	123.469	112.565	106.097	97.4689	122.607	141.123	162.53	155.635	1371.37	287.31	225.848	217.67	283.706	415.517	286.456	277.663	291.537	141.123	171.178	184.916	2782.92	10.324	8.11547	7.82163	10.1945	14.9309	10.2934	9.97738	10.4759	5.07102	6.15101	6.64468
2139	sp|O00459|P85B_HUMAN	PIK3R2	P85B_HUMAN Phosphatidylinositol 3-kinase regulatory subunit beta	464	REYDQLYEEYTRT	73.3109	R	R.EYDQLY#EEYTR.T	1	2	2	110.471	129.599	73.508	114.387	86.7691	115.738	140.3	98.9828	342.7	236.43	177.138	1626.02	284.59	207.484	164.485	262.837	320.294	312.486	399.678	235.363	342.7	249.011	210.466	2989.39	9.51999	6.94068	5.5023	8.79231	10.7143	10.4531	13.3699	7.87328	11.4639	8.3298	7.04042
2971	sp|P07948|LYN_HUMAN	LYN	LYN_HUMAN Tyrosine-protein kinase Lyn	194	LDNGGYYISPRIT	30.8348	R	R.SLDNGGYY#ISPR.I	1	1	1	110.194	254.098	54.1355	49.6653	63.4003	70.3364	55.4559	56.6547	145.012	132.698	114.441	1106.09	283.876	406.805	121.137	114.12	234.032	189.904	157.979	134.715	145.012	139.758	135.972	2063.31	13.7583	19.7161	5.87098	5.53094	11.3426	9.20387	7.65659	6.52906	7.02811	6.7735	6.58999
3239	sp|O75116|ROCK2_HUMAN	ROCK2	ROCK2_HUMAN Rho-associated protein kinase 2	722	ADKNKIYESIEEA	30.8348	R	K.IY#ESIEEAK.S	1	2	1	109.939	145.625	102.252	80.9178	63.4904	82.1916	79.1566	77.5388	165.066	166.925	146.708	1219.81	283.219	233.142	228.804	185.932	234.365	221.913	225.496	184.373	165.066	175.807	174.31	2312.43	12.2477	10.0821	9.89454	8.04055	10.135	9.59654	9.75149	7.97315	7.13823	7.6027	7.53797
1545	sp|P27986-4|P85A_HUMAN	PIK3R1	P85A_HUMAN Isoform 4 of Phosphatidylinositol 3-kinase regulatory subunit alpha	452	GKKLHEYNTQFQE	59.2977	R	K.LHEY#NTQFQEK.S	1	1	1	109.616	98.4086	114.05	158.15	86.7898	114.769	115.479	225.022	211.876	202.725	167.871	1604.76	282.387	157.55	255.205	363.394	320.371	309.869	328.968	535.061	211.876	213.512	199.455	3177.65	8.88666	4.95806	8.03127	11.4359	10.082	9.75153	10.3526	16.8383	6.6677	6.71919	6.2768
878	sp|Q8IYB3|SRRM1_HUMAN	SRRM1	SRRM1_HUMAN Serine/arginine repetitive matrix protein 1	769	KPPAPPSPVQSQS	27.7716	R	K.KPPAPPS#PVQSQSPSTNWSPAVPVK.K	0	3	2	108.617	131.01	177.376	169.776	128.112	153.088	167.262	181.19	161.449	165.225	186.633	1729.74	279.814	209.744	396.907	390.11	472.905	413.328	476.486	430.838	161.449	174.016	221.746	3627.34	7.71402	5.78231	10.9421	10.7547	13.0372	11.3948	13.1359	11.8775	4.4509	4.79735	6.11319
1163	sp|Q15464|SHB_HUMAN	SHB	SHB_HUMAN SH2 domain-containing adapter protein B	8	AKWLNKYFSLGNS	30.8348	R	K.Y#FSLGNSK.T	1	1	1	108.505	388.491	224.65	187.007	78.5779	172.241	123.078	154.101	313.972	365.626	451.701	2567.95	279.525	621.964	502.688	429.703	290.058	465.041	350.616	366.425	313.972	385.081	536.686	4541.76	6.15456	13.6943	11.0681	9.46117	6.38646	10.2392	7.71982	8.06792	6.913	8.47867	11.8167
2856	sp|Q9UN19|DAPP1_HUMAN	DAPP1	DAPP1_HUMAN Dual adapter for phosphotyrosine and 3-phosphotyrosine and 3-phosphoinositide	139	VEEPSIYESVRVH	30.8348	R	K.VEEPSIY#ESVR.V	1	3	3	107.849	365.592	166.584	144.406	48.9534	160.825	145.165	112.805	721.562	687.856	592.856	3254.45	277.834	585.304	372.758	331.815	180.704	434.217	413.537	268.229	721.562	724.456	704.398	5014.81	5.54026	11.6715	7.43314	6.61669	3.6034	8.65869	8.24632	5.34873	14.3886	14.4463	14.0463
2829	sp|Q9Y276|BCS1_HUMAN	BCS1L	BCS1_HUMAN Mitochondrial chaperone BCS1	181	EWRPFGYPRRRRP	29.6669	R	K.TVMYTAVGSEWRPFGY#PR.R	1	2	2	107.299	114.904	111.689	94.626	96.6511	103.997	119.904	107.208	137.214	132.358	119.693	1245.54	276.417	183.959	249.922	217.43	356.772	280.787	341.573	254.92	137.214	139.401	142.213	2580.61	10.7113	7.12852	9.6846	8.42555	13.8251	10.8806	13.2362	9.8783	5.31714	5.40185	5.51083
3539	sp|Q6P531|GGT6_HUMAN	GGT6	GGT6_HUMAN Gamma-glutamyltransferase 6	10	AEEPVVYQKLLPW	1000	R	R.AEEPVVY#QK.L	1	2	2	107.05	134.317	112.967	146.453	65.1085	91.7253	82.4295	118.496	323.964	325.342	339.53	1847.38	275.777	215.037	252.781	336.518	240.338	247.653	234.82	281.763	323.964	342.653	403.41	3154.71	8.74173	6.81638	8.0128	10.6671	7.61836	7.85026	7.44345	8.93149	10.2692	10.8616	12.7875
3691	sp|Q8WXH5|SOCS4_HUMAN	SOCS4	SOCS4_HUMAN Suppressor of cytokine signaling 4	30	ADRKDGYVWSGKK	57.7111	U	K.DGY#VWSGK.K	1	2	2	106.943	148.623	146.179	95.1844	91.9896	133.806	121.481	104.226	207.279	156.215	119.076	1431	275.501	237.942	327.097	218.713	339.565	361.268	346.066	247.831	207.279	164.527	141.48	2867.27	9.60847	8.29856	11.408	7.62794	11.8428	12.5997	12.0695	8.64344	7.22914	5.73811	4.93431
3032	sp|Q8N7R7|CCYL1_HUMAN	CCNYL1	CCYL1_HUMAN Cyclin-Y-like protein 1	105	VREKRKSNHLNHV	65.2463	R	K.S#NHLNHVSPGQLTK.K	0	1	1	106.56	99.356	99.7938	87.2688	66.65	97.0669	88.7593	78.1784	173.518	169.078	148.463	1214.69	274.515	159.066	223.304	200.525	246.028	262.075	252.852	185.894	173.518	178.074	176.395	2332.25	11.7704	6.82031	9.57462	8.59794	10.549	11.237	10.8415	7.97061	7.43993	7.63532	7.56331
1366	sp|Q9C0B5|ZDHC5_HUMAN	ZDHHC5	ZDHC5_HUMAN Palmitoyltransferase ZDHHC5	630	PGPTAPYLGRSMS	71.7529	R	R.GVGSPEPGPTAPY#LGR.S	1	2	2	106.456	281.901	149.307	103.089	64.9168	118.976	73.6768	87.1652	353.083	308.362	245.726	1892.66	274.245	451.316	334.096	236.876	239.63	321.229	209.886	207.263	353.083	324.77	291.958	3244.35	8.453	13.9108	10.2978	7.30118	7.38607	9.90116	6.46926	6.38843	10.883	10.0103	8.99897
716	sp|Q86X29|LSR_HUMAN	LSR	LSR_HUMAN Lipolysis-stimulated lipoprotein receptor	586	RSGDLPYDGRLLE	81.6917	R	R.SGDLPY#DGR.L	1	1	1	105.535	285.231	125.03	108.76	48.684	101.001	73.9894	103.963	385.525	365.673	262.467	1965.86	271.874	456.647	279.775	249.907	179.709	272.696	210.776	247.206	385.525	385.131	311.849	3251.09	8.36255	14.0459	8.60555	7.68686	5.52765	8.38781	6.48323	7.60379	11.8583	11.8462	9.59211
569	tr|C9J6P4|C9J6P4_HUMAN	ZC3HAV1	C9J6P4_HUMAN Zinc finger CCCH-type antiviral protein 1	410	GLLSSDYRIINGK	30.8348	R	K.GTGLLSSDY#R.I	1	1	1	105.09	257.235	108.912	99.2094	62.4184	87.1736	76.0309	89.3213	233.562	227.77	282.228	1628.95	270.727	411.826	243.708	227.962	230.408	235.364	216.592	212.39	233.562	239.889	335.327	2857.75	9.47341	14.4108	8.52794	7.97697	8.06254	8.23597	7.57909	7.43207	8.17291	8.39432	11.7339
2626	sp|P42684|ABL2_HUMAN	ABL2	ABL2_HUMAN Abelson tyrosine-protein kinase 2	568	SSSVVPYLPRLPI	20.1669	R	R.AASSSSVVPY#LPR.L	1	1	1	104.975	74.1616	65.1836	50.864	34.9829	47.5736	47.8712	50.2277	145.817	120.489	87.922	830.067	270.43	118.731	145.858	116.875	129.134	128.446	136.372	119.432	145.817	126.9	104.464	1542.46	17.5324	7.6975	9.45621	7.57716	8.37194	8.32736	8.84122	7.74299	9.45352	8.22714	6.77256
3203	sp|P18206|VINC_HUMAN	VCL	VINC_HUMAN Vinculin	692	PGNQAAYEHFETM	60.3582	R	R.NPGNQAAY#EHFETM*K.N	1	1	1	104.735	76.9634	75.3304	53.146	69.9293	56.3172	51.8237	59.1908	83.856	71.6628	59.0095	761.964	269.813	123.216	168.563	122.118	258.133	152.053	147.632	140.745	83.856	75.4758	70.1118	1611.72	16.7407	7.64504	10.4586	7.5769	16.016	9.43423	9.15991	8.73262	5.2029	4.68295	4.35013
2311	sp|P62158|CALM_HUMAN	CALM1	CALM_HUMAN Calmodulin	100	DKDGNGYISAAEL	76.7327	R	K.DGNGY#ISAAELR.H	1	2	2	103.788	139.893	156.466	202.197	77.3959	178.456	221.046	332.377	320.811	311.446	194.273	2238.15	267.373	223.965	350.117	464.606	285.695	481.822	629.701	790.332	320.811	328.018	230.824	4373.26	6.11381	5.12123	8.00586	10.6238	6.53275	11.0174	14.3989	18.0719	7.33574	7.50054	5.27807
2051	sp|Q04837|SSBP_HUMAN	SSBP1	SSBP_HUMAN Single-stranded DNA-binding protein, mitochondrial	73	SGDSEVYQLGDVS	23.6238	R	R.SGDSEVY#QLGDVSQK.T	1	1	1	103.226	171.687	88.0347	83.6344	47.9242	87.646	56.6252	79.6361	184.154	227.232	278.032	1407.83	265.926	274.866	196.991	192.174	176.905	236.639	161.31	189.36	184.154	239.323	330.342	2447.99	10.863	11.2282	8.04705	7.85027	7.22652	9.66667	6.58949	7.73534	7.52268	9.77631	13.4944
2373	sp|P53396|ACLY_HUMAN	ACLY	ACLY_HUMAN ATP-citrate synthase	481	PQDSVPSPRSLQG	23.6238	U	K.AKPAMPQDSVPS#PR.S	0	1	1	102.825	108.063	99.1831	102.926	92.9383	101.742	111.045	95.0362	108.259	115.852	96.0393	1133.91	264.892	173.006	221.937	236.501	343.067	274.699	316.339	225.979	108.259	122.017	114.109	2400.8	11.0335	7.20618	9.24429	9.8509	14.2897	11.442	13.1764	9.41263	4.5093	5.08233	4.75293
3494	sp|Q13425|SNTB2_HUMAN	SNTB2	SNTB2_HUMAN Beta-2-syntrophin	203	IREVTPYIKKPSL	17.0091	R	R.EVTPY#IK.K	1	1	1	102.764	256.891	282.651	169.563	102.746	217.397	199.631	228.77	617.748	553.467	343.557	3075.18	264.736	411.276	632.474	389.619	379.27	586.961	568.694	543.973	617.748	582.916	408.195	5385.86	4.91539	7.63621	11.7432	7.23411	7.04195	10.8982	10.559	10.1	11.4698	10.8231	7.57901
2370	sp|P16591|FER_HUMAN	FER	FER_HUMAN Tyrosine-protein kinase Fer	402	PPPVVNYEEDARS	1000	R	K.VQENDGKEPPPVVNY#EEDAR.S	1	1	1	102.575	74.5516	47.2742	46.286	57.4929	26.0667	27.5497	35.2884	80.7409	87.5836	94.2625	679.672	264.249	119.355	105.783	106.355	212.226	70.3786	78.4817	83.9094	80.7409	92.2438	111.997	1325.72	19.9325	9.00304	7.9793	8.02245	16.0083	5.30871	5.91993	6.32934	6.09034	6.95801	8.44804
3316	sp|P52735|VAV2_HUMAN	VAV2	VAV2_HUMAN Guanine nucleotide exchange factor VAV2	442	VCKRKGYSYELKE	30.8348	R	K.GY#SYELK.E	1	1	1	102.396	139.323	170.947	193.889	77.0633	142.789	159.09	254.56	316.75	297.086	291.055	2144.95	263.788	223.052	382.519	445.516	284.467	385.524	453.204	605.299	316.75	312.894	345.816	4018.83	6.5638	5.55018	9.51818	11.0857	7.07836	9.59294	11.277	15.0616	7.88164	7.7857	8.60489
1948	sp|Q96G74|OTUD5_HUMAN	OTUD5	OTUD5_HUMAN OTU domain-containing protein 5	64	GARPRASPPPQGP	1000	R	R.AS#PPPQGPLPGPPGALHR.W	0	1	1	101.694	61.4725	60.8825	49.1899	39.0046	64.8585	60.0073	55.999	83.1406	75.2972	40.1006	691.647	261.978	98.4159	136.234	113.028	143.979	175.114	170.945	133.155	83.1406	79.3037	47.6454	1442.94	18.1559	6.82052	9.44142	7.83317	9.97818	12.136	11.847	9.22807	5.7619	5.49599	3.30197
2624	sp|P14625|ENPL_HUMAN	HSP90B1	ENPL_HUMAN Endoplasmin	678	DISTNYYASQKKT	48.8739	R	K.DISTNYY#ASQK.K	1	1	1	100.216	127.454	93.335	89.0448	76.8034	111.554	95.7887	116.997	167.847	163.006	145.983	1288.03	258.17	204.051	208.851	204.606	283.507	301.19	272.876	278.197	167.847	171.68	173.449	2524.42	10.2269	8.08308	8.27323	8.10505	11.2306	11.9311	10.8095	11.0202	6.64891	6.80075	6.87082
1649	sp|P51149|RAB7A_HUMAN	RAB7A	RAB7A_HUMAN Ras-related protein Rab-7a	183	ETEVELYNEFPEP	65.4396	R	K.QETEVELY#NEFPEPIK.L	1	7	4	99.8896	248.089	226.825	168.064	61.5488	207.696	159.234	206.473	803.837	959.332	664.303	3805.29	257.33	397.183	507.555	386.176	227.198	560.768	453.614	490.956	803.837	1010.38	789.288	5884.28	4.37318	6.7499	8.6256	6.56284	3.8611	9.52993	7.70891	8.34352	13.6607	17.1708	13.4135
2059	sp|P57768|SNX16_HUMAN	SNX16	SNX16_HUMAN Sorting nexin-16	86	TASSIEYSTRPRD	17.0091	R	K.FTGTASSIEY#STRPR.D	1	1	1	99.8877	74.2194	73.1764	54.8282	63.8945	63.3919	61.5208	63.968	146.157	123.437	129.316	953.797	257.325	118.823	163.743	125.984	235.856	171.155	175.256	152.104	146.157	130.005	153.646	1830.06	14.0611	6.49288	8.94746	6.88414	12.8879	9.35244	9.57656	8.31146	7.98651	7.10386	8.39568
1824	sp|Q13191|CBLB_HUMAN	CBLB	CBLB_HUMAN E3 ubiquitin-protein ligase CBL-B	709	EEDDDEYKIPSSH	153.97	R	K.TRDPVEEDDDEY#K.I	1	2	2	99.6152	143.586	69.6452	61.6972	54.1304	47.5742	51.2094	52.2883	221.685	184.908	158.961	1145.3	256.623	229.878	155.842	141.767	199.814	128.448	145.882	124.332	221.685	194.747	188.869	1987.89	12.9094	11.5639	7.83958	7.13154	10.0516	6.46152	7.33855	6.25449	11.1518	9.79667	9.501
628	sp|Q99569|PKP4_HUMAN	PKP4	PKP4_HUMAN Plakophilin-4	114	AVQPNNYLIRTEP	84.6094	R	R.VSDAVQPNNY#LIR.T	1	2	2	99.0767	203.747	103.545	74.4673	56.7324	72.5476	60.1394	61.9645	242.032	246.831	217.425	1438.51	255.236	326.193	231.697	171.11	209.419	195.874	171.321	147.34	242.032	259.964	258.332	2468.52	10.3396	13.2141	9.38607	6.93169	8.48357	7.9349	6.94024	5.96878	9.80476	10.5312	10.465
3085	sp|Q9ULF5|S39AA_HUMAN	SLC39A10	S39AA_HUMAN Zinc transporter ZIP10	596	ESPPKNYLCIEEE	1000	R	K.NY#LCIEEEK.I	1	2	2	99.0109	177.979	123.894	119.815	88.8417	119.512	101.357	116.748	258.777	239.09	155.494	1600.52	255.067	284.939	277.232	275.31	327.945	322.676	288.739	277.605	258.777	251.812	184.75	3004.85	8.48849	9.48264	9.22614	9.1622	10.9138	10.7385	9.60908	9.23858	8.61198	8.38018	6.14838
1528	sp|Q9Y2D5-4|AKAP2_HUMAN	AKAP2	AKAP2_HUMAN Isoform 2 of A-kinase anchor protein 2	1009	KVKPPPSPTTEGP	18.6027	R	K.VKPPPS#PTTEGPSLQPDLAPEEAAGTQRPK.N	0	1	1	98.9105	126.862	121.166	132.68	74.9006	126.462	133.143	145.117	162.468	165.987	162.892	1450.59	254.808	203.103	271.128	304.87	276.484	341.442	379.29	345.062	162.468	174.819	193.539	2907.01	8.76528	6.98666	9.32669	10.4874	9.51092	11.7454	13.0474	11.87	5.58884	6.0137	6.65767
2813	sp|O60890|OPHN1_HUMAN	OPHN1	OPHN1_HUMAN Oligophrenin-1	370	DGKEPIYHSPITK	59.2977	R	K.EPIY#HSPITK.Q	1	2	2	98.8953	316.812	255.613	244.112	109.358	241.917	233.614	291.723	682.325	653.832	534.745	3662.95	254.769	507.208	571.974	560.918	403.677	653.163	665.504	693.664	682.325	688.622	635.354	6317.18	4.03295	8.02903	9.05427	8.87925	6.39016	10.3395	10.5348	10.9806	10.8011	10.9008	10.0576
1275	sp|O15231-6|ZN185_HUMAN	ZNF185	ZN185_HUMAN Isoform 6 of Zinc finger protein 185	195	APREHSYVLSAAK	24.2431	R	R.EHSY#VLSAAK.K	1	2	2	98.5345	509.77	325.018	178.251	87.274	262.384	172.72	175.756	552.436	431.149	198.453	2991.75	253.839	816.129	727.278	409.582	322.158	708.423	492.033	417.915	552.436	454.09	235.791	5389.67	4.70973	15.1425	13.4939	7.59938	5.97732	13.1441	9.12917	7.75399	10.2499	8.42519	4.37486
603	sp|Q9H5V8|CDCP1_HUMAN	CDCP1	CDCP1_HUMAN CUB domain-containing protein 1	806	ESESEPYTFSHPN	16.062	R	R.SPPESESEPY#TFSHPNNGDVSSK.D	1	1	1	97.6227	41.7086	8.2597	4.39039	49.9355	6.80008	6.38851	5.48199	43.1572	58.4161	28.3981	350.559	251.49	66.7744	18.4823	10.0882	184.329	18.3598	18.1991	13.0352	43.1572	61.5243	33.7411	719.181	34.969	9.28479	2.56991	1.40273	25.6304	2.55288	2.53054	1.8125	6.00088	8.55477	4.6916
523	sp|P16885|PLCG2_HUMAN	PLCG2	PLCG2_HUMAN 1-phosphatidylinositol 4,5-bisphosphate phosphodiesterase gamma-2	753	RDINSLYDVSRMY	30.8348	U	R.DINSLY#DVSR.M	1	1	1	97.4734	151.809	88.1849	81.7267	43.9431	75.4833	70.4322	66.579	235.133	266.617	322.439	1499.82	251.106	243.042	197.327	187.791	162.209	203.801	200.643	158.313	235.133	280.803	383.104	2503.27	10.0311	9.70896	7.88278	7.50181	6.47988	8.14138	8.01522	6.32424	9.39305	11.2174	15.3041
3605	sp|Q9H5Y7|SLIK6_HUMAN	SLITRK6	SLIK6_HUMAN SLIT and NTRK-like protein 6	820	EQTKNEYFELKAN	1000	U	K.NEY#FELK.A	1	1	1	96.9393	260.09	168.121	88.3034	53.6591	109.685	90.4312	79.4592	670.795	507.842	331.759	2457.09	249.73	416.398	376.197	202.902	198.074	296.144	257.614	188.94	670.795	534.864	394.178	3785.84	6.59642	10.9988	9.93697	5.35952	5.23198	7.82243	6.80468	4.9907	17.7185	14.128	10.4119
1339	sp|Q92569|P55G_HUMAN	PIK3R3	P55G_HUMAN Phosphatidylinositol 3-kinase regulatory subunit gamma	184	GKKLQEYHSQYQE	76.7327	R	K.KLQEY#HSQYQEK.S	1	2	2	96.2784	144.951	144.866	312.507	86.5907	196.429	217.137	372.712	378.224	374.479	374.92	2699.09	248.027	232.062	324.16	718.075	319.636	530.347	618.565	886.242	378.224	394.404	445.459	5095.2	4.86786	4.55452	6.36206	14.0932	6.27327	10.4088	12.1401	17.3937	7.42314	7.7407	8.74271
3762	sp|P62249|RS16_HUMAN	RPS16	RS16_HUMAN 40S ribosomal protein S16	82	GHVAQIYAIRQSI	1000	R	K.GGGHVAQIY#AIR.Q	1	1	1	95.9716	90.7978	87.7451	59.2055	60.6893	57.4604	56.911	52.3615	95.4319	79.9273	75.2192	811.721	247.237	145.365	196.343	136.042	224.025	155.14	162.124	124.506	95.4319	84.1802	89.3713	1659.76	14.8959	8.75816	11.8296	8.19644	13.4974	9.3471	9.7679	7.50143	5.74973	5.07181	5.38457
615	sp|Q15942|ZYX_HUMAN	ZYX	ZYX_HUMAN Zyxin	344	NQNQVRSPGAPGP	33.1903	R	R.S#PGAPGPLTLK.E	0	1	1	95.7577	73.6654	63.6992	90.5818	57.2976	43.9292	43.4732	56.8119	149.644	147.172	174.65	996.682	246.686	117.936	142.537	208.138	211.505	118.606	123.843	135.088	149.644	155.003	207.51	1816.5	13.5803	6.49252	7.84679	11.4582	11.6436	6.52941	6.81771	7.43675	8.23807	8.53306	11.4236
2331	sp|Q12955|ANK3_HUMAN	ANK3	ANK3_HUMAN Ankyrin-3	1459	KTDRRQSFASLAL	23.6238	R	R.RQS#FASLALR.K	0	1	1	95.6803	61.8834	45.9541	34.0188	24.3924	36.5899	27.0502	35.6992	128.893	117.654	97.1532	704.969	246.486	99.0737	102.829	78.1681	90.0406	98.7907	77.0588	84.8862	128.893	123.915	115.432	1245.57	19.789	7.95406	8.25559	6.27567	7.22884	7.93134	6.18662	6.81503	10.3481	9.9484	9.26738
402	sp|Q15262-3|PTPRK_HUMAN	PTPRK	PTPRK_HUMAN Isoform 3 of Receptor-type tyrosine-protein phosphatase kappa	917	NRAKNRYGNIIAY	85.2649	R	R.Y#GNIIAYDHSR.V	1	3	2	95.6211	164.461	109.446	120.459	81.4687	101.126	102.26	142.643	249.897	216.703	192.679	1576.76	246.334	263.297	244.903	276.79	300.729	273.035	291.31	339.178	249.897	228.234	228.931	2942.64	8.37119	8.94766	8.32255	9.40618	10.2197	9.27859	9.89963	11.5263	8.49229	7.7561	7.77978
2124	sp|P26045|PTN3_HUMAN	PTPN3	PTN3_HUMAN Tyrosine-protein phosphatase non-receptor type 3	496	TEDASQYYCDKND	48.8739	R	K.GGSTEDASQY#YCDK.N	1	1	1	94.9004	164.753	106.515	56.7859	77.4534	124.602	96.3691	81.1085	378.791	289.735	151.053	1622.07	244.477	263.765	238.344	130.482	285.907	336.419	274.53	192.861	378.791	305.151	179.472	2830.2	8.63817	9.31965	8.42144	4.61034	10.102	11.8868	9.70002	6.81441	13.3839	10.782	6.34133
3027	sp|P63167|DYL1_HUMAN	DYNLL1	DYL1_HUMAN Dynein light chain 1, cytoplasmic	65	GRNFGSYVTHETK	17.0091	R	R.NFGSY#VTHETK.H	1	1	1	94.4879	122.587	111.771	210.591	97.1739	122.883	136.261	294.061	227.224	241.062	261.449	1919.55	243.415	196.258	250.105	483.894	358.702	331.777	388.171	699.225	227.224	253.888	310.639	3743.3	6.50268	5.24292	6.68142	12.9269	9.58251	8.86322	10.3698	18.6794	6.07017	6.78248	8.29853
2954	sp|Q06481|APLP2_HUMAN	APLP2	APLP2_HUMAN Amyloid-like protein 2	750	KMQNHGYENPTYK	99.2279	R	K.MQNHGY#ENPTYK.Y	1	2	2	94.3409	106.613	91.8306	64.0261	47.8145	65.9008	66.9936	78.4027	112.958	97.7758	78.2532	904.909	243.036	170.684	205.485	147.118	176.5	177.929	190.847	186.428	112.958	102.978	92.9762	1806.94	13.4502	9.44603	11.372	8.14185	9.76788	9.84697	10.5619	10.3173	6.25135	5.69905	5.14551
2027	sp|P12931-2|SRC_HUMAN	SRC	SRC_HUMAN Isoform 2 of Proto-oncogene tyrosine-protein kinase Src	222	LDSGGFYITSRTQ	31.2747	R	K.LDSGGFY#ITSR.T	1	1	1	94.1676	88.7594	82.567	64.2875	82.1512	81.8636	84.3412	88.6493	129.763	104.102	331.445	1232.1	242.59	142.101	184.756	147.719	303.248	221.027	240.265	210.792	129.763	109.641	393.805	2325.71	10.4308	6.11003	7.94409	6.35157	13.0389	9.50365	10.3308	9.06357	5.57951	4.71432	16.9327
1617	sp|P18887|XRCC1_HUMAN	XRCC1	XRCC1_HUMAN DNA repair protein XRCC1	453	SPQKPPTPEETKA	15.0073	R	K.TKPTQAAGPSSPQKPPT#PEETK.A	0	1	1	94.1103	95.435	80.5446	84.6246	95.754	102.691	111.024	121.067	110.832	101.753	62.2688	1060.1	242.442	152.789	180.231	194.449	353.461	277.261	316.278	287.875	110.832	107.167	73.9844	2296.77	10.5558	6.65235	7.84715	8.46621	15.3895	12.0718	13.7706	12.5339	4.82557	4.666	3.22124
2698	sp|P98172|EFNB1_HUMAN	EFNB1	EFNB1_HUMAN Ephrin-B1	317	NNYCPHYEKVSGD	115.01	U	R.TTENNYCPHY#EK.V	1	2	1	93.2527	106.779	89.4631	70.0886	65.026	78.9134	68.5663	72.6388	129.292	101.4	51.837	927.256	240.233	170.95	200.187	161.049	240.033	213.062	195.327	172.722	129.292	106.795	61.5898	1891.24	12.7024	9.03906	10.585	8.51551	12.6918	11.2657	10.328	9.13274	6.83634	5.64683	3.25658
40	sp|O60716|CTND1_HUMAN	CTNND1	CTND1_HUMAN Catenin delta-1	296	GYDDLDYGMMSDY	50.7033	R	R.SMGYDDLDY#GMM*SDYGTAR.R	1	4	3	92.5527	149.444	117.995	95.3135	62.8568	96.9821	87.4102	97.7839	346.119	268.352	191.203	1606.01	238.429	239.256	264.033	219.01	232.026	261.846	249.008	232.513	346.119	282.63	227.177	2792.05	8.53959	8.56918	9.4566	7.84407	8.31024	9.37829	8.91848	8.32767	12.3966	10.1227	8.13658
2791	sp|Q15750|TAB1_HUMAN	TAB1	TAB1_HUMAN TGF-beta-activated kinase 1 and MAP3K7-binding protein 1	391	GRVYPVSVPYSSA	15.0073	R	R.VYPVS#VPYSSAQSTSK.T	0	1	1	92.2842	82.933	90.2628	64.9075	44.1659	63.8752	68.3962	66.6211	167.392	147.87	183.115	1071.82	237.738	132.774	201.977	149.144	163.031	172.46	194.842	158.413	167.392	155.738	217.567	1951.07	12.185	6.80515	10.3521	7.64418	8.35597	8.83921	9.98642	8.11927	8.57946	7.98219	11.1511
3761	sp|Q13424|SNTA1_HUMAN	SNTA1	SNTA1_HUMAN Alpha-1-syntrophin	175	MKDVSPYFKNSTG	59.2977	U	K.DVSPY#FK.N	1	2	2	91.8783	620.41	359.732	175.171	90.6528	381.2	284.223	312.158	846.279	783.482	407.904	4353.09	236.692	993.26	804.954	402.506	334.63	1029.22	809.676	742.256	846.279	825.17	484.649	7509.29	3.15199	13.2271	10.7194	5.36011	4.45622	13.7059	10.7823	9.88451	11.2698	10.9887	6.45399
633	sp|Q99569|PKP4_HUMAN	PKP4	PKP4_HUMAN Plakophilin-4	478	LNTTATYAEPYRP	30.8348	R	R.NNYALNTTATY#AEPYRPIQYR.V	1	1	1	91.7561	55.3278	26.1506	21.145	15.0598	15.6223	12.3686	9.88042	111.722	100.624	54.2008	513.857	236.377	88.5784	58.5159	48.5866	55.5908	42.1794	35.2348	23.4939	111.722	105.979	64.3983	870.655	27.1493	10.1738	6.72091	5.58047	6.38494	4.84455	4.04692	2.69841	12.8319	12.1723	7.39654
3209	sp|P29692-2|EF1D_HUMAN	EEF1D	EF1D_HUMAN Isoform 2 of Elongation factor 1-delta	499	PQTQHVSPMRQVE	58.5514	R	R.ATAPQTQHVS#PMR.Q	0	3	3	91.5988	105.764	89.1614	90.1962	67.7507	71.1832	88.5582	82.0851	137.589	113.467	115.002	1052.36	235.972	169.325	199.512	207.252	250.091	192.191	252.279	195.184	137.589	119.504	136.639	2095.54	11.2607	8.08026	9.52082	9.89015	11.9344	9.17143	12.0389	9.31425	6.56582	5.7028	6.52047
1477	sp|Q9Y490|TLN1_HUMAN	TLN1	TLN1_HUMAN Talin-1	70	AGKALDYYMLRNG	24.437	R	K.ALDY#YMLR.N	1	1	1	91.4499	80.1316	60.7128	93.5201	79.7269	67.1216	64.8203	109.632	148.393	135.905	181.221	1112.63	235.588	128.289	135.854	214.889	294.299	181.225	184.656	260.685	148.393	143.137	215.316	2142.33	10.9968	5.98827	6.34142	10.0306	13.7373	8.45922	8.61939	12.1683	6.92673	6.68135	10.0506
2337	sp|Q5VTE0|EF1A3_HUMAN	EEF1A1P5	EF1A3_HUMAN Putative elongation factor 1-alpha-like 3	29	TTGHLIYKCGGID	100.017	R	K.STTTGHLIY#K.C	1	1	1	91.353	74.2584	60.3179	46.2105	50.3258	49.4191	60.1862	52.0939	127.409	102.571	88.5547	802.699	235.339	118.886	134.971	106.182	185.77	133.429	171.454	123.87	127.409	108.029	105.216	1550.55	15.1777	7.66731	8.70467	6.848	11.9809	8.60524	11.0576	7.98876	8.21698	6.96712	6.78569
1897	sp|Q13113|PDZ1I_HUMAN	PDZK1IP1	PDZ1I_HUMAN PDZK1-interacting protein 1	85	TDGRYSSMAASFR	17.0091	U	R.YSS#M*AASFR.S	0	1	1	90.2757	54.5863	34.6427	43.9554	34.3279	25.3246	29.0718	39.2019	44.8886	53.8094	52.8609	502.945	232.563	87.3913	77.5183	101	126.716	68.3751	82.8177	93.2151	44.8886	56.6726	62.8064	1033.96	22.4924	8.45206	7.49719	9.76824	12.2553	6.6129	8.00973	9.01531	4.34141	5.4811	6.07433
3091	sp|Q5SXH7-5|PKHS1_HUMAN	PLEKHS1	PKHS1_HUMAN Isoform 5 of Pleckstrin homology domain-containing family S member 1	209	VKEENHYLTPRSV	30.8348	R	K.EENHY#LTPR.S	1	1	1	90.0386	37.5775	30.3178	20.863	46.1515	19.3428	16.9884	16.0617	57.4057	54.4824	49.1905	438.42	231.953	60.1606	67.8407	47.9387	170.361	52.2244	48.3953	38.1918	57.4057	57.3813	58.4455	890.297	26.0534	6.75736	7.62001	5.38457	19.1353	5.86595	5.43586	4.28978	6.44793	6.44519	6.56471
3328	sp|P20936|RASA1_HUMAN	RASA1	RASA1_HUMAN Ras GTPase-activating protein 1	460	VDGKEIYNTIRRK	30.8348	R	K.EIY#NTIR.R	1	1	1	89.982	148.293	67.867	56.5841	28.5923	40.9073	34.0392	30.3039	231.618	288.621	268.474	1285.28	231.807	237.414	151.863	130.018	105.544	110.447	96.9685	72.0571	231.618	303.978	318.985	1990.7	11.6445	11.9262	7.62862	6.53129	5.30185	5.54817	4.87108	3.61969	11.635	15.2699	16.0238
1013	sp|Q09666|AHNK_HUMAN	AHNAK	AHNK_HUMAN Neuroblast differentiation-associated protein AHNAK	160	TRRVTAYTVDVTG	31.2747	U	R.RVTAY#TVDVTGR.E	1	2	2	89.7589	176.051	104.871	77.1151	45.9189	82.8075	78.4308	74.8132	213.451	183.702	157.73	1284.65	231.232	281.853	234.664	177.194	169.502	223.576	223.429	177.892	213.451	193.476	187.406	2313.67	9.99415	12.1821	10.1425	7.65856	7.3261	9.66323	9.65687	7.68874	9.22561	8.36229	8.09992
3100	sp|P20700|LMNB1_HUMAN	LMNB1	LMNB1_HUMAN Lamin-B1	138	QIKLREYEAALNS	97.6019	R	K.LREY#EAALNSK.D	1	1	1	89.5181	92.8713	88.1102	75.901	74.9883	83.8812	80.4487	79.3871	122.405	104.594	83.3682	975.473	230.612	148.685	197.16	174.404	276.807	226.475	229.177	188.768	122.405	110.16	99.0534	2003.71	11.5093	7.42048	9.83977	8.70409	13.8148	11.3028	11.4376	9.42096	6.10892	5.49779	4.94351
2026	sp|P12931-2|SRC_HUMAN	SRC	SRC_HUMAN Isoform 2 of Proto-oncogene tyrosine-protein kinase Src	193	ETTKGAYCLSVSD	33.6572	R	K.GAY#CLSVSDFDNAK.G	1	1	1	89.4807	106.747	87.7358	82.1343	74.9817	87.6092	85.2322	80.5881	122.378	101.379	507.377	1425.64	230.515	170.9	196.322	188.727	276.783	236.54	242.804	191.624	122.378	106.774	602.837	2566.2	8.98273	6.65963	7.6503	7.35433	10.7857	9.2175	9.46159	7.46722	4.76883	4.16076	23.4914
3679	sp|P14618-2|KPYM_HUMAN	PKM	KPYM_HUMAN Isoform M1 of Pyruvate kinase PKM	370	ETAKGDYPLEAVR	1000	R	K.GDY#PLEAVR.M	1	1	1	89.1028	76.818	72.4634	65.9924	66.5285	57.5582	59.8185	62.1286	104.9	79.6831	75.2147	810.208	229.542	122.984	162.148	151.636	245.579	155.404	170.407	147.731	104.9	83.9229	89.366	1663.62	13.7977	7.39253	9.7467	9.11485	14.7617	9.34131	10.2431	8.88007	6.30554	5.0446	5.37178
2790	sp|P48029|SC6A8_HUMAN	SLC6A8	SC6A8_HUMAN Sodium- and chloride-dependent creatine transporter 1	5	xxMAKKSAENGIY	34.0887	U	K.S#AENGIYSVSGDEK.K	0	1	1	88.8741	144.395	95.3792	85.519	57.4536	72.8708	68.6005	80.4845	223.538	233.132	150.216	1300.46	228.953	231.172	213.425	196.504	212.081	196.747	195.425	191.378	223.538	245.537	178.478	2313.24	9.8975	9.99344	9.22627	8.49478	9.16814	8.50527	8.4481	8.27315	9.66342	10.6144	7.7155
2690	sp|P17096-3|HMGA1_HUMAN	HMGA1	HMGA1_HUMAN Isoform HMG-R of High mobility group protein HMG-I/HMG-Y	44	GTALVGSQKEPSE	49.5899	R	R.KQPPVSPGTALVGS#QK.E	0	1	1	88.7788	128.348	155.359	109.842	138.337	178.024	136.617	157.706	106.089	111.363	154.74	1465.2	228.707	205.482	347.639	252.394	510.65	480.656	389.184	374.997	106.089	117.288	183.854	3196.94	7.15393	6.42746	10.8741	7.89486	15.9731	15.0349	12.1736	11.7299	3.31846	3.66876	5.75092
446	sp|Q16625|OCLN_HUMAN	OCLN	OCLN_HUMAN Occludin	443	DTGLQEYKSLQSE	111.687	R	K.RNFDTGLQEY#K.S	1	2	2	88.6892	153.167	155.836	213.005	71.1615	212.098	288.301	432.365	471.527	398.433	238.051	2722.63	228.476	245.217	348.706	489.44	262.681	572.652	821.294	1028.09	471.527	419.633	282.839	5170.55	4.4188	4.74257	6.74408	9.46592	5.08033	11.0753	15.8841	19.8835	9.11947	8.11582	5.47019
1380	sp|Q9UJU6-3|DBNL_HUMAN	DBNL	DBNL_HUMAN Isoform 3 of Drebrin-like protein	162	APVGSVYQKTNAV	20.1669	R	R.FQDVGPQAPVGSVY#QK.T	1	1	1	88.4664	183.418	96.8202	112.761	54.2996	65.1147	59.7416	79.7233	161.387	202.53	197.44	1301.7	227.902	293.647	216.65	259.101	200.438	175.806	170.188	189.568	161.387	213.307	234.587	2342.58	9.72868	12.5352	9.24834	11.0605	8.5563	7.5048	7.26497	8.09226	6.8893	9.10563	10.014
1970	sp|P23528|COF1_HUMAN	CFL1	COF1_HUMAN Cofilin-1	140	ELQANCYEEVKDR	1000	R	K.HELQANCY#EEVK.D	1	1	1	88.4011	66.8937	86.8151	121.91	48.7753	87.9304	99.2444	199.639	227	165.536	120.379	1312.52	227.734	107.095	194.262	280.124	180.046	237.407	282.721	474.706	227	174.343	143.028	2528.47	9.00681	4.23558	7.683	11.0788	7.12076	9.38938	11.1815	18.7744	8.97777	6.89523	5.65669
3730	sp|P99999|CYC_HUMAN	CYCS	CYC_HUMAN Cytochrome c	98	RADLIAYLKKATN	1000	R	R.ADLIAY#LK.K	1	1	1	88.183	89.8387	83.5897	78.7113	82.5483	83.0735	89.7873	91.2399	133.379	103.719	135.602	1059.67	227.172	143.829	187.045	180.862	304.714	224.294	255.78	216.952	133.379	109.238	161.115	2144.38	10.5939	6.70727	8.72255	8.43422	14.2099	10.4596	11.9279	10.1172	6.21994	5.09415	7.51334
570	tr|C9J6P4|C9J6P4_HUMAN	ZC3HAV1	C9J6P4_HUMAN Zinc finger CCCH-type antiviral protein 1	299	LTRKFTYLGSQDR	24.437	R	K.FTY#LGSQDR.A	1	1	1	88.1465	159.673	96.6765	93.8971	59.9675	74.031	66.5403	70.064	274.326	280.329	257.718	1521.37	227.078	255.633	216.328	215.755	221.36	199.88	189.556	166.6	274.326	295.245	306.206	2567.97	8.84273	9.95468	8.42412	8.4018	8.62006	7.78358	7.38155	6.48761	10.6826	11.4972	11.9241
1538	sp|Q15223|PVRL1_HUMAN	PVRL1	PVRL1_HUMAN Poliovirus receptor-related protein 1	468	EDAKRPYFTVDEA	31.2747	U	K.RPY#FTVDEAEAR.Q	1	1	1	87.9405	169.43	96.8049	60.7817	44.4457	69.8583	50.1322	63.2412	120.187	115.36	100.914	979.095	226.548	271.252	216.616	139.663	164.064	188.613	142.813	150.376	120.187	121.498	119.901	1861.53	12.17	14.5714	11.6364	7.5026	8.8134	10.1322	7.67182	8.07808	6.45637	6.52676	6.44097
1821	sp|O15357|SHIP2_HUMAN	INPPL1	SHIP2_HUMAN Phosphatidylinositol 3,4,5-trisphosphate 5-phosphatase 2	1135	TLSEVDYAPAGPA	59.2977	R	K.TLSEVDY#APAGPAR.S	1	2	2	87.6168	127.626	82.237	70.453	51.4738	64.881	71.3387	59.2099	258.387	272.716	309.108	1455.05	225.714	204.326	184.018	161.886	190.007	175.175	203.225	140.79	258.387	287.227	367.264	2398.02	9.4125	8.52063	7.67374	6.75082	7.9235	7.30499	8.47469	5.87111	10.775	11.9777	15.3153
3690	sp|O14493|CLD4_HUMAN	CLDN4	CLD4_HUMAN Claudin-4	208	SAAASNYVxxxxx	48.8739	U	R.SAAASNY#V.-	1	2	2	87.581	116.333	87.9821	83.2717	75.171	71.8172	63.9041	78.9139	196.82	148.621	154.745	1165.16	225.621	186.246	196.873	191.341	277.482	193.902	182.046	187.643	196.82	156.529	183.86	2178.36	10.3574	8.54983	9.03768	8.78369	12.7381	8.90129	8.35699	8.61394	9.03525	7.1856	8.44026
1482	sp|O14964|HGS_HUMAN	HGS	HGS_HUMAN Hepatocyte growth factor-regulated tyrosine kinase substrate	216	RVCEPCYEQLNRK	1000	R	R.VCEPCY#EQLNR.K	1	2	2	85.9339	102.158	125.875	261.553	105.513	118.708	148.118	430.079	165.654	152.498	258.422	1954.51	221.378	163.552	281.663	600.993	389.484	320.504	421.948	1022.65	165.654	160.612	307.043	4055.48	5.45874	4.03285	6.94525	14.8193	9.6039	7.90298	10.4044	25.2165	4.08469	3.96038	7.57106
817	sp|P19174-2|PLCG1_HUMAN	PLCG1	PLCG1_HUMAN Isoform 2 of 1-phosphatidylinositol 4,5-bisphosphate phosphodiesterase gamma-1	771	GTAEPDYGALYEG	76.7327	R	K.IGTAEPDY#GALYEGR.N	1	5	4	85.5593	325.054	132.898	126.753	41.2219	93.9424	85.9415	107.237	829.005	875.483	939.448	3642.54	220.413	520.403	297.38	291.252	152.164	253.639	244.824	254.991	829.005	922.067	1116.2	5102.34	4.31985	10.1993	5.8283	5.70821	2.98224	4.97104	4.79828	4.99753	16.2475	18.0715	21.8762
1194	sp|Q9H201|EPN3_HUMAN	EPN3	EPN3_HUMAN Epsin-3	393	DPWALNSPHHKLP	37.549	R	R.TPVLPAGPPTTDPWALNS#PHHK.L	0	1	1	84.8073	93.1767	135.554	145.249	80.7521	98.3493	111.691	108.315	111.467	99.5477	106.51	1175.42	218.476	149.173	303.323	333.75	298.083	265.538	318.178	257.555	111.467	104.845	126.55	2486.94	8.78495	5.99828	12.1966	13.4201	11.986	10.6773	12.794	10.3563	4.4821	4.21581	5.08858
2884	sp|Q99426|TBCB_HUMAN	TBCB	TBCB_HUMAN Tubulin-folding cofactor B	98	GARLGEYEDVSRV	76.7327	R	R.LGEY#EDVSR.V	1	1	1	84.661	287.118	122.797	121.808	42.8148	92.4779	81.3646	87.8119	258.134	324.154	299.848	1802.99	218.099	459.668	274.776	279.89	158.044	249.685	231.786	208.801	258.134	341.402	356.263	3036.55	7.18247	15.1378	9.04896	9.21737	5.20472	8.22267	7.63321	6.87626	8.50091	11.2431	11.7325
2663	sp|P98179|RBM3_HUMAN	RBM3	RBM3_HUMAN Putative RNA-binding protein 3	127	RPGGYGYGYGRSR	20.1669	U	R.YYDSRPGGYGY#GYGR.S	1	1	1	84.6243	65.9563	51.825	40.7225	40.5166	44.9208	40.6891	37.437	97.1691	65.8407	61.4958	631.197	218.004	105.594	115.966	93.5717	149.56	121.284	115.912	89.0185	97.1691	69.344	73.0659	1248.49	17.4614	8.45775	9.28853	7.49479	11.9793	9.71441	9.2842	7.13009	7.78292	5.55423	5.85234
430	sp|Q92841|DDX17_HUMAN	DDX17	DDX17_HUMAN Probable ATP-dependent RNA helicase DDX17	279	LKSTCIYGGAPKG	53.5337	R	K.STCIY#GGAPK.G	1	1	1	84.3722	134.926	86.0837	78.4695	90.2817	88.5694	87.637	99.4946	207.288	183.74	148.683	1289.55	217.355	216.013	192.625	180.306	333.26	239.132	249.654	236.58	207.288	193.516	176.657	2442.39	8.89929	8.84432	7.88676	7.38237	13.6449	9.79093	10.2217	9.68643	8.48712	7.92323	7.23297
2412	sp|Q8NI22|MCFD2_HUMAN	MCFD2	MCFD2_HUMAN Multiple coagulation factor deficiency protein 2	135	DKNNDGYIDYAEF	24.2431	R	K.NNDGY#IDYAEFAK.S	1	2	1	84.0284	311.737	164.148	132.392	58.6058	162.946	110.616	152.008	397.569	430.447	344.891	2349.39	216.47	499.082	367.306	304.209	216.334	439.944	315.116	361.448	397.569	453.35	409.781	3980.61	5.4381	12.5378	9.22739	7.64228	5.4347	11.0522	7.91628	9.08021	9.98764	11.389	10.2944
694	sp|O96013|PAK4_HUMAN	PAK4	PAK4_HUMAN Serine/threonine-protein kinase PAK 4	181	RDKRPLSGPDVGT	26.1051	U	K.RPLS#GPDVGTPQPAGLASGAK.L	0	1	1	83.9442	76.7542	81.631	86.0233	76.0626	77.0535	74.6244	89.1631	127.837	134.58	119.404	1027.08	216.252	122.881	182.662	197.663	280.773	208.04	212.585	212.014	127.837	141.741	141.869	2044.32	10.5782	6.01088	8.93511	9.66891	13.7343	10.1765	10.3988	10.3709	6.25326	6.93341	6.93967
2339	sp|Q5VTE0|EF1A3_HUMAN	EEF1A1P5	EF1A3_HUMAN Putative elongation factor 1-alpha-like 3	86	FETSKYYVTIIDA	17.0091	R	K.YY#VTIIDAPGHR.D	1	1	1	83.8396	87.3153	61.668	51.9554	63.5872	66.6203	70.9702	70.5474	113.281	109.127	86.9463	865.858	215.983	139.79	137.992	119.383	234.722	179.871	202.175	167.749	113.281	114.933	103.305	1729.18	12.4905	8.08414	7.98017	6.90398	13.5742	10.4021	11.6919	9.70106	6.55112	6.64668	5.9742
3042	sp|O43491|E41L2_HUMAN	EPB41L2	E41L2_HUMAN Band 4.1-like protein 2	623	VEGDNIYVRHSNL	1000	R	R.VEGDNIY#VR.H	1	2	1	83.5257	226.874	87.0746	65.2893	30.6877	53.2887	49.0333	56.6856	661.047	591.066	434.025	2338.6	215.174	363.219	194.843	150.021	113.279	143.876	139.683	134.788	661.047	622.516	515.684	3254.13	6.61235	11.1618	5.98755	4.61017	3.48108	4.42135	4.29247	4.14206	20.3141	19.13	15.8471
1182	sp|Q9BZI7|REN3B_HUMAN	UPF3B	REN3B_HUMAN Regulator of nonsense transcripts 3B	117	RDRFDGYVFLDNK	1000	R	R.DRFDGY#VFLDNK.G	1	5	4	82.6078	158.9	242.14	340.075	66.4308	269.011	366.748	554.383	638.119	553.625	365.562	3637.6	212.81	254.395	541.825	781.42	245.219	726.314	1044.77	1318.22	638.119	583.083	434.341	6780.51	3.13855	3.75185	7.99091	11.5245	3.61652	10.7118	15.4084	19.4413	9.41107	8.59939	6.40573
3508	sp|P20810-6|ICAL_HUMAN	CAST	ICAL_HUMAN Isoform 6 of Calpastatin	288	VTIPPKYRELLAK	1000	R	K.Y#RELLAK.K	1	1	1	82.1687	96.8223	89.7864	88.7169	36.0757	83.272	68.8883	85.428	170.073	157.369	85.2595	1043.86	211.679	155.01	200.911	203.853	133.168	224.83	196.244	203.132	170.073	165.743	101.301	1965.94	10.7673	7.88477	10.2196	10.3692	6.77373	11.4362	9.98221	10.3326	8.65095	8.4307	5.15277
3251	sp|Q96T37|RBM15_HUMAN	RBM15	RBM15_HUMAN Putative RNA-binding protein 15	333	LERERDYPFYERV	57.7111	R	R.ERDY#PFYER.V	1	1	1	81.1952	72.3289	87.1658	53.3988	44.4304	54.0133	53.3711	44.4881	119.894	106.813	75.5674	792.666	209.171	115.797	195.047	122.699	164.008	145.833	152.04	105.785	119.894	112.497	89.785	1532.55	13.6485	7.5558	12.7269	8.00618	10.7016	9.51568	9.92069	6.90252	7.82314	7.34048	5.85852
39	sp|O60716|CTND1_HUMAN	CTNND1	CTND1_HUMAN Catenin delta-1	208	LPRNFHYPPDGYS	71.9493	R	R.NFHY#PPDGYSR.H	1	2	2	80.3508	181.385	108.978	97.5231	59.6504	98.5884	81.8556	84.4797	296.607	264.518	152.328	1506.26	206.996	290.392	243.856	224.087	220.19	266.183	233.185	200.878	296.607	278.592	180.988	2641.95	7.83494	10.9916	9.23014	8.48188	8.33436	10.0752	8.82622	7.60337	11.2268	10.5449	6.85053
1922	sp|Q08345-5|DDR1_HUMAN	DDR1	DDR1_HUMAN Isoform 4 of Epithelial discoidin domain-containing receptor 1	798	GMSRNLYAGDYYR	51.0043	R	R.NLY#AGDY#YR.V	1	3	1	80.2874	119.811	124.289	84.6848	65.8127	83.4578	83.4946	96.201	131.873	117.033	84.909	1071.85	206.832	191.814	278.116	194.588	242.937	225.331	237.854	228.749	131.873	123.26	100.884	2162.24	9.56565	8.87109	12.8624	8.99937	11.2354	10.4212	11.0004	10.5793	6.09891	5.70058	4.66573
2130	sp|P25685|DNJB1_HUMAN	DNAJB1	DNJB1_HUMAN DnaJ homolog subfamily B member 1	176	VSLEEIYSGCTKK	48.8739	R	R.VSLEEIY#SGCTK.K	1	2	2	80.2199	100.735	150.951	276.613	78.0139	184.214	226.389	328.99	412.531	427.919	333.734	2600.31	206.658	161.274	337.775	635.598	287.976	497.368	644.921	782.279	412.531	450.688	396.524	4813.59	4.29322	3.35039	7.01712	13.2042	5.98255	10.3326	13.3979	16.2515	8.57012	9.36283	8.23758
2066	sp|Q14134|TRI29_HUMAN	TRIM29	TRI29_HUMAN Tripartite motif-containing protein 29	93	DDKNSNYFSMDSM	51.0043	R	K.NSNY#FSMDSMEGK.R	1	4	3	79.1603	718.686	449.174	331.302	70.3752	301.905	223.665	284.837	453.82	368.519	224.687	3506.13	203.929	1150.6	1005.09	761.261	259.779	815.127	637.163	677.291	453.82	388.127	266.96	6619.15	3.08089	17.3829	15.1847	11.5009	3.92466	12.3147	9.62605	10.2323	6.85617	5.8637	4.03315
695	sp|Q14247-2|SRC8_HUMAN	CTTN	SRC8_HUMAN Isoform 2 of Src substrate cortactin	178	SAVGFDYQGKTEK	62.6585	R	K.SAVGFDY#QGK.T	1	1	1	78.8008	293.564	173.87	140.232	57.4038	129.567	98.7137	114.748	302.795	328.814	276.233	1994.74	203.002	469.988	389.061	322.224	211.897	349.824	281.209	272.851	302.795	346.309	328.204	3477.36	5.83782	13.5156	11.1884	9.26633	6.0936	10.06	8.08684	7.84649	8.7076	9.95896	9.4383
3061	sp|Q13573|SNW1_HUMAN	SNW1	SNW1_HUMAN SNW domain-containing protein 1	176	KLAPAQYIRYTPS	1000	R	K.LAPAQY#IR.Y	1	1	1	78.6655	106.603	75.9725	61.3981	43.7748	54.4725	50.7375	49.6917	146.154	143.776	134.615	945.861	202.654	170.668	170	141.08	161.588	147.073	144.538	118.158	146.154	151.426	159.942	1713.28	11.8284	9.96149	9.9225	8.23448	9.43147	8.58427	8.43631	6.8966	8.53066	8.83838	9.33543
3248	sp|Q6NZI2|PTRF_HUMAN	PTRF	PTRF_HUMAN Polymerase I and transcript release factor	308	TPDHVVYARSKTA	85.2649	R	K.SFTPDHVVY#AR.S	1	2	2	78.6305	105.259	118.082	180.753	58.0952	104.729	115.328	222.406	532.898	474.458	381.046	2371.68	202.564	168.517	264.226	415.331	214.449	282.762	328.539	528.841	532.898	499.704	452.737	3890.57	5.20653	4.33142	6.79146	10.6753	5.51202	7.26788	8.4445	13.5929	13.6972	12.844	11.6368
2990	sp|Q96JM3|CHAP1_HUMAN	CHAMP1	CHAP1_HUMAN Chromosome alignment-maintaining phosphoprotein 1	282	PEPRKPSPSESPE	24.2431	U	R.KPS#PSESPEPWKPFPAVSPEPR.R	0	1	1	78.507	79.8824	93.0818	84.5537	71.4177	78.3259	87.0428	79.3674	101.073	90.8588	82.455	926.566	202.245	127.89	208.285	194.286	263.627	211.476	247.962	188.721	101.073	95.6932	97.9685	1939.23	10.4292	6.59488	10.7406	10.0188	13.5944	10.9052	12.7866	9.73178	5.21205	4.93461	5.05194
2727	sp|Q13951-2|PEBB_HUMAN	CBFB	PEBB_HUMAN Isoform 2 of Core-binding factor subunit beta	85	QTPSREYVDLERE	1000	R	R.EY#VDLER.E	1	3	3	78.4898	227.418	223.474	152.08	47.4359	163.642	151.5	201.388	426.643	491.04	343.205	2506.32	202.201	364.09	500.058	349.447	175.102	441.825	431.583	478.864	426.643	517.167	407.777	4294.76	4.70809	8.47754	11.6434	8.13659	4.07711	10.2876	10.0491	11.15	9.93403	12.0418	9.49477
336	sp|P22626|ROA2_HUMAN	HNRNPA2B1	ROA2_HUMAN Heterogeneous nuclear ribonucleoproteins A2/B1	331	RNMGGPYGGGNYG	60.3582	R	R.NM*GGPY#GGGNYGPGGSGGSGGYGGR.S	1	3	2	78.1413	127.078	121.583	88.9644	164.019	120.772	145.02	133.647	129.326	101.742	82.3318	1292.63	201.303	203.449	272.06	204.421	605.45	326.078	413.124	317.79	129.326	107.156	97.8221	2877.98	6.99461	7.06917	9.45315	7.10295	21.0373	11.3301	14.3547	11.0421	4.49363	3.7233	3.39899
1986	sp|Q96NY8|PVRL4_HUMAN	PVRL4	PVRL4_HUMAN Poliovirus receptor-related protein 4	502	PTGNGIYINGRGH	60.3582	R	R.AKPTGNGIY#INGR.G	1	1	1	78.1395	209.694	106.881	77.4609	41.3455	78.2785	71.4267	77.1318	271.943	347.849	319.574	1679.72	201.299	335.715	239.162	177.989	152.62	211.348	203.476	183.406	271.943	366.357	379.699	2723.01	7.3925	12.3288	8.78299	6.53646	5.60483	7.76154	7.47244	6.73539	9.98684	13.4541	13.9441
2150	sp|Q9UQB8|BAIP2_HUMAN	BAIAP2	BAIP2_HUMAN Brain-specific angiogenesis inhibitor 1-associated protein 2	164	SDKELQYIDAISN	142.629	R	K.ELQY#IDAISNK.Q	1	2	2	77.4379	243.023	255.29	311.797	67.3782	320.614	438.449	649.364	752.883	750.977	578.833	4446.05	199.491	389.074	571.251	716.444	248.716	865.64	1249.02	1544.07	752.883	790.936	687.737	8015.27	2.48889	4.85416	7.12703	8.93849	3.10303	10.7999	15.5831	19.2641	9.39311	9.86786	8.58034
451	sp|Q16625|OCLN_HUMAN	OCLN	OCLN_HUMAN Occludin	325	VDSPMAYSSNGKV	17.0091	R	R.VDSPMAY#SSNGK.V	1	1	1	77.187	95.4366	61.4266	56.6466	44.5024	49.7353	49.707	67.0463	148.141	144.73	230.215	1024.77	198.845	152.792	137.451	130.162	164.273	134.283	141.602	159.424	148.141	152.431	273.528	1792.93	11.0905	8.52188	7.66629	7.25972	9.16227	7.48955	7.89779	8.8918	8.26252	8.50177	15.2559
2372	sp|P53396|ACLY_HUMAN	ACLY	ACLY_HUMAN ATP-citrate synthase	682	RTTDGVYEGVAIG	59.2977	R	R.TTDGVY#EGVAIGGDR.Y	1	1	1	77.0884	84.6205	71.9703	101.511	68.5391	64.4545	70.3217	127.084	119.544	104.747	94.4853	984.366	198.591	135.475	161.044	233.251	253.001	174.024	200.328	302.184	119.544	110.32	112.262	2000.02	9.92943	6.77368	8.05213	11.6624	12.6499	8.70107	10.0163	15.109	5.97712	5.51595	5.61304
3716	sp|Q9BPZ7|SIN1_HUMAN	MAPKAP1	SIN1_HUMAN Target of rapamycin complex 2 subunit MAPKAP1	497	STARADYFAQKQR	1000	R	R.ADY#FAQK.Q	1	1	1	76.7778	135.309	111.281	131.293	69.0506	114.145	118.485	182.254	291.225	266.406	208.402	1704.63	197.791	216.627	249.008	301.682	254.889	308.185	337.532	433.368	291.225	280.581	247.612	3118.5	6.3425	6.9465	7.98486	9.67396	8.17346	9.88247	10.8235	13.8967	9.33861	8.99732	7.9401
2914	sp|Q96RK0|CIC_HUMAN	CIC	CIC_HUMAN Protein capicua homolog	277	NKDRKKSSSEAKP	19.8431	R	K.S#SSEAKPTSLGLAGGHK.E	0	1	1	76.6297	252.943	155.53	155.375	31.3265	154.943	97.6236	109.157	305.423	296.524	236.136	1871.61	197.409	404.955	348.021	357.019	115.637	418.336	278.103	259.556	305.423	312.301	280.563	3277.32	6.02349	12.3563	10.6191	10.8936	3.52839	12.7646	8.48568	7.91974	9.31928	9.52915	8.56074
2201	sp|O76039|CDKL5_HUMAN	CDKL5	CDKL5_HUMAN Cyclin-dependent kinase-like 5	171	NANYTEYVATRWY	44.2778	R	R.NLSEGNNANYTEY#VATR.W	1	1	1	76.5925	83.0067	71.4952	51.9142	56.3721	68.9795	68.5134	53.4365	110.68	93.8114	93.131	827.932	197.313	132.892	159.981	119.288	208.089	186.241	195.176	127.062	110.68	98.803	110.653	1646.18	11.9862	8.07273	9.71835	7.24635	12.6407	11.3135	11.8563	7.71862	6.72343	6.00196	6.72182
1600	sp|P37198|NUP62_HUMAN	NUP62	NUP62_HUMAN Nuclear pore glycoprotein p62	422	EQSGTIYLQHADE	31.2747	R	K.EQSGTIY#LQHADEER.E	1	2	2	76.3789	155.052	92.8912	76.054	57.3506	68.5669	71.9973	86.2519	153.899	144.877	136.546	1119.86	196.763	248.233	207.858	174.756	211.7	185.127	205.101	205.092	153.899	152.586	162.236	2103.35	9.35475	11.8018	9.88224	8.30845	10.0649	8.80152	9.75116	9.75071	7.31683	7.2544	7.71322
2989	sp|Q96JM3|CHAP1_HUMAN	CHAMP1	CHAP1_HUMAN Chromosome alignment-maintaining phosphoprotein 1	204	KLAPVPSPEPQKP	50.1945	U	K.LAPVPS#PEPQKPAPVSPESVK.A	0	1	1	75.8841	132.194	103.793	95.7548	59.4423	73.1691	73.8107	75.4016	124.196	112.501	124.659	1050.81	195.488	211.639	232.253	220.024	219.422	197.552	210.267	179.291	124.196	118.487	148.113	2056.73	9.50481	10.2901	11.2923	10.6978	10.6685	9.60516	10.2234	8.71729	6.03849	5.76095	7.20135
1132	sp|Q96A22|CK052_HUMAN	C11orf52	CK052_HUMAN Uncharacterized protein C11orf52	78	EDSNLHYADIQVC	38.3708	U	R.SPGLMSEDSNLHY#ADIQVCSRPHAR.E	1	3	3	75.6679	217.824	140.204	115.307	63.4302	99.161	75.0773	93.6091	258.769	263.163	299.851	1702.06	194.931	348.731	313.729	264.952	234.142	267.729	213.875	222.586	258.769	277.166	356.266	2952.88	6.60141	11.8099	10.6245	8.97266	7.9293	9.06673	7.24295	7.53793	8.76329	9.3863	12.0651
1260	sp|Q07912-3|ACK1_HUMAN	TNK2	ACK1_HUMAN Isoform 3 of Activated CDC42 kinase 1	905	FASDPKYATPQVI	48.8739	R	K.Y#ATPQVIQAPGPR.A	1	1	1	75.5521	136.299	73.4223	44.5483	48.4386	59.7619	54.5333	38.9044	139.596	137.952	78.2875	887.295	194.633	218.212	164.294	102.363	178.803	161.354	155.351	92.5078	139.596	145.292	93.0168	1645.42	11.8288	13.2618	9.98489	6.22105	10.8667	9.80623	9.4414	5.62213	8.48388	8.83007	5.65307
632	sp|Q99569|PKP4_HUMAN	PKP4	PKP4_HUMAN Plakophilin-4	1168	LKSTTNYVDFYST	31.2747	R	K.STTNY#VDFYSTK.R	1	1	1	75.2283	104.704	38.0329	31.448	16.1683	21.9063	14.6806	13.14	211.898	187.802	131.51	846.518	193.799	167.628	85.1045	72.2609	59.6825	59.1459	41.8212	31.2445	211.898	197.795	156.253	1276.63	15.1805	13.1305	6.66633	5.66027	4.675	4.63297	3.2759	2.44742	16.5982	15.4935	12.2395
989	sp|Q68CZ2|TENS3_HUMAN	TNS3	TENS3_HUMAN Tensin-3	855	VSPETPYVKTALR	44.2778	R	K.ESMCSTPAFPVSPETPY#VK.T	1	3	2	74.9182	183.474	106.627	72.1203	48.0496	110.306	95.3577	85.3252	722.665	577.398	287.723	2363.97	193	293.737	238.595	165.717	177.367	297.82	271.649	202.888	722.665	608.121	341.857	3513.42	5.49323	8.36043	6.79098	4.71669	5.04829	8.47665	7.73175	5.77466	20.5687	17.3085	9.73004
1770	sp|O15027-5|SC16A_HUMAN	SEC16A	SC16A_HUMAN Isoform 5 of Protein transport protein Sec16A	1031	DGAASAYAQNYRY	20.1669	R	R.YRPYDGAASAY#AQNYR.Y	1	1	1	74.8631	85.107	53.5768	48.7497	38.2334	37.7306	29.7129	25.9415	49.5194	58.0373	280.843	782.315	192.858	136.254	119.886	112.016	141.133	101.87	84.644	61.6842	49.5194	61.1254	333.682	1394.67	13.8282	9.76961	8.59601	8.03173	10.1194	7.30425	6.0691	4.42284	3.55061	4.38278	23.9255
2963	sp|Q00610|CLH1_HUMAN	CLTC	CLH1_HUMAN Clathrin heavy chain 1	430	QGQLNKYESLELC	20.1669	R	K.Y#ESLELCRPVLQQGR.K	1	1	1	73.9527	87.9504	78.4945	72.7041	61.874	66.9961	72.7304	92.8028	99.0629	88.4805	128.067	923.115	190.513	140.806	175.643	167.059	228.398	180.886	207.19	220.668	99.0629	93.1885	152.162	1855.58	10.2671	7.58828	9.46571	9.00306	12.3087	9.74823	11.1658	11.8922	5.33866	5.02208	8.20023
634	sp|Q99569|PKP4_HUMAN	PKP4	PKP4_HUMAN Plakophilin-4	1156	FPASTDYSTQYGL	30.8348	R	R.VHFPASTDY#STQYGLK.S	1	1	1	73.8885	195.946	66.0351	65.5504	19.2577	46.1764	33.8201	29.7345	351.562	368.606	242.24	1492.82	190.348	313.704	147.764	150.621	71.0866	124.674	96.3445	70.7034	351.562	388.219	287.816	2192.84	8.68041	14.3058	6.73846	6.86875	3.24176	5.68548	4.39359	3.22428	16.0323	17.7039	13.1252
2006	sp|Q9UDY2-7|ZO2_HUMAN	TJP2	ZO2_HUMAN Isoform 7 of Tight junction protein ZO-2	1038	QNKEESYDFSKSY	24.437	R	K.EESY#DFSK.S	1	1	1	73.7722	437.163	208.158	146.516	59.9945	163.657	124.879	160.076	576.903	500.541	366.612	2818.27	190.048	699.886	465.785	336.663	221.46	441.866	355.746	380.631	576.903	527.174	435.588	4631.75	4.10315	15.1106	10.0563	7.26859	4.78135	9.53993	7.68059	8.21787	12.4554	11.3817	9.4044
2520	sp|Q9UEU0|VTI1B_HUMAN	VTI1B	VTI1B_HUMAN Vesicle transport through interaction with t-SNAREs homolog 1B	115	DMKYGIYAVENEH	15.0073	R	K.YGIY#AVENEHMNR.L	1	1	1	73.6515	79.0409	66.0877	53.4811	46.4494	63.4053	58.2821	59.3367	112.941	97.0874	81.4901	791.253	189.737	126.542	147.881	122.888	171.461	171.191	166.03	141.092	112.941	102.253	96.822	1548.84	12.2503	8.17015	9.54789	7.93421	11.0703	11.0529	10.7197	9.10953	7.29198	6.60193	6.25126
2501	sp|Q02241|KIF23_HUMAN	KIF23	KIF23_HUMAN Kinesin-like protein KIF23	769	DRRRGMYWTEGRE	17.0091	R	R.GM*Y#WTEGR.E	1	1	1	73.0661	65.7845	68.0668	64.042	32.6945	47.1484	47.3209	55.7442	163.715	163.611	154.046	935.24	188.229	105.319	152.31	147.155	120.686	127.298	134.804	132.55	163.715	172.317	183.029	1627.41	11.5661	6.47158	9.35902	9.04226	7.41584	7.82211	8.28336	8.14482	10.0598	10.5884	11.2467
568	tr|C9J6P4|C9J6P4_HUMAN	ZC3HAV1	C9J6P4_HUMAN Zinc finger CCCH-type antiviral protein 1	77	RVCRRKYCQRPCD	1000	R	K.Y#CQRPCDNLHLCK.L	1	1	1	72.8699	158.205	275.533	430.399	75.8031	240.365	365.543	681.995	337.267	358.914	380.383	3377.28	187.723	253.282	616.548	988.964	279.815	648.971	1041.33	1621.66	337.267	378.011	451.95	6805.53	2.7584	3.7217	9.05952	14.5318	4.11158	9.53594	15.3013	23.8286	4.95578	5.55448	6.64093
610	sp|Q14126|DSG2_HUMAN	DSG2	DSG2_HUMAN Desmoglein-2	1013	HLQDVPYVMVRER	77.9225	U	R.VIQPHGGGSNPLEGTQHLQDVPY#VM*VR.E	1	4	2	72.6533	169.783	100.044	120.532	57.1957	83.2486	66.6949	85.2144	219.666	290.127	353.655	1618.81	187.165	271.818	223.863	276.957	211.129	224.767	189.996	202.624	219.666	305.564	420.193	2733.74	6.84649	9.94308	8.1889	10.1311	7.72307	8.22193	6.95003	7.41198	8.03534	11.1775	15.3706
1728	sp|O75955|FLOT1_HUMAN	FLOT1	FLOT1_HUMAN Flotillin-1	238	AQADLAYQLQVAK	1000	R	R.RAQADLAY#QLQVAK.T	1	2	2	72.5635	212.348	129.681	103.261	48.9287	80.0279	73.8722	90.0253	366.98	474.626	385.895	2038.21	186.934	339.964	290.181	237.272	180.612	216.071	210.442	214.064	366.98	499.88	458.499	3200.9	5.84005	10.6209	9.0656	7.41266	5.64255	6.75032	6.57447	6.68762	11.4649	15.6169	14.3241
1936	sp|Q6DN90|IQEC1_HUMAN	IQSEC1	IQEC1_HUMAN IQ motif and SEC7 domain-containing protein 1	343	GGAAPDYWALAHK	1000	R	R.AGGAAPDY#WALAHK.E	1	1	1	72.3812	96.4408	73.3416	61.3725	36.7765	49.7195	48.3796	44.1496	202.173	182.623	182.451	1049.81	186.465	154.399	164.113	141.021	135.754	134.24	137.82	104.98	202.173	192.341	216.778	1770.08	10.5342	8.7227	9.27148	7.96691	7.66938	7.58381	7.7861	5.93078	11.4217	10.8662	12.2468
3799	sp|Q14160-3|SCRIB_HUMAN	SCRIB	SCRIB_HUMAN Isoform 3 of Protein scribble homolog	1360	FRERQKYFELEVR	1000	R	K.Y#FELEVR.V	1	1	1	71.9757	81.5283	56.4737	41.7942	41.6726	48.8428	52.5485	47.6865	98.0083	90.2885	69.3317	700.151	185.42	130.525	126.369	96.0342	153.828	131.873	149.697	113.39	98.0083	95.0926	82.3761	1362.61	13.6077	9.57901	9.274	7.04781	11.2892	9.67795	10.986	8.32151	7.19268	6.97871	6.04546
2674	sp|O00233|PSMD9_HUMAN	PSMD9	PSMD9_HUMAN 26S proteasome non-ATPase regulatory subunit 9	62	LVDCEGYPRSDVD	1000	R	K.GIGM*NEPLVDCEGY#PR.S	1	2	2	71.9687	91.9159	80.0083	74.2663	38.7127	68.9508	68.8745	72.5075	173.254	139.012	128.957	1008.43	185.402	147.155	179.031	170.648	142.902	186.163	196.205	172.41	173.254	146.409	153.219	1852.8	10.0066	7.94232	9.66272	9.2103	7.71275	10.0477	10.5897	9.30538	9.35092	7.90203	8.26962
3414	sp|Q13242|SRSF9_HUMAN	SRSF9	SRSF9_HUMAN Serine/arginine-rich splicing factor 9	211	PYQSRGSPHYFSP	33.6572	U	R.GS#PHYFSPFRPY.-	0	1	1	71.8891	72.6184	60.4037	64.2236	51.2213	57.8233	59.2157	50.0204	91.0982	81.7644	75.0641	735.342	185.197	116.26	135.163	147.572	189.075	156.12	168.69	118.939	91.0982	86.115	89.187	1483.42	12.4845	7.83733	9.11158	9.94812	12.7459	10.5243	11.3717	8.01795	6.14111	5.80518	6.01227
2869	sp|Q8N3V7-2|SYNPO_HUMAN	SYNPO	SYNPO_HUMAN Isoform 2 of Synaptopodin	804	PPPRMRSPQPARP	14.4608	U	R.M*RS#PQPARPGSAAVPGAAFAPIPR.S	0	1	1	71.8186	72.323	58.8156	47.2013	39.2725	49.6318	47.9474	39.6993	90.0347	82.3589	74.0012	673.104	185.015	115.787	131.609	108.458	144.968	134.003	136.589	94.3977	90.0347	86.7411	87.9241	1315.53	14.0639	8.80158	10.0043	8.24448	11.0198	10.1863	10.3829	7.17565	6.84399	6.59364	6.68356
2952	sp|Q9NQX5|NPDC1_HUMAN	NPDC1	NPDC1_HUMAN Neural proliferation differentiation and control protein 1	249	AQSAEMYHYQHQR	18.8054	R	R.LAQSAEMY#HYQHQR.Q	1	1	1	70.8291	80.8553	65.7002	53.1943	53.1577	65.8611	57.6152	63.8941	107.123	90.697	75.4358	784.363	182.466	129.447	147.014	122.229	196.223	177.821	164.13	151.929	107.123	95.5229	89.6286	1563.54	11.6701	8.27914	9.40268	7.81748	12.55	11.373	10.4974	9.71699	6.85136	6.10942	5.73244
3637	sp|Q14644|RASA3_HUMAN	RASA3	RASA3_HUMAN Ras GTPase-activating protein 3	822	DKSFQNYIRQQSE	44.2778	R	K.SFQNY#IR.Q	1	1	1	70.6576	291.2	138.127	98.0653	54.9816	121.971	88.7302	76.9823	222.854	223.883	150.745	1538.2	182.024	466.204	309.08	225.333	202.956	329.314	252.769	183.05	222.854	235.795	179.106	2788.49	6.52771	16.7189	11.0842	8.08084	7.27835	11.8098	9.06472	6.56449	7.99193	8.45603	6.42307
699	sp|Q14247-2|SRC8_HUMAN	CTTN	SRC8_HUMAN Isoform 2 of Src substrate cortactin	297	TQVSSAYQKTVPV	20.1669	R	K.NASTFEDVTQVSSAY#QK.T	1	2	1	70.5066	187.95	99.6862	77.9851	44.7488	73.9821	60.0119	69.8601	215.017	185.193	104.172	1189.11	181.635	300.903	223.063	179.193	165.183	199.748	170.958	166.115	215.017	195.047	123.772	2120.63	8.56514	14.1893	10.5187	8.44998	7.78933	9.41924	8.06164	7.83326	10.1393	9.19758	5.83654
3142	sp|Q70E73|RAPH1_HUMAN	RAPH1	RAPH1_HUMAN Ras-associated and pleckstrin homology domains-containing protein 1	856	PPPSPLSPVPSVV	15.0073	R	K.QQSFCAKPPPSPLS#PVPSVVK.Q	0	1	1	70.3961	219.574	321.987	328.876	64.4586	171.015	150.684	145.647	205.734	259.274	226.623	2164.27	181.351	351.533	720.494	755.687	237.939	461.73	429.259	346.322	205.734	273.07	269.261	4232.38	4.28484	8.3058	17.0234	17.8549	5.62187	10.9095	10.1423	8.18269	4.86095	6.45192	6.36194
2404	sp|Q9H1C7|CYTM1_HUMAN	CYSTM1	CYTM1_HUMAN Cysteine-rich and transmembrane domain-containing protein 1	64	PPKTTVYVVEDQR	48.8739	U	K.TTVY#VVEDQRR.D	1	2	2	70.3297	132.646	81.2451	73.3325	39.3259	76.7652	59.6383	77.326	152.723	173.746	152.683	1089.76	181.18	212.363	181.798	168.502	145.165	207.262	169.894	183.867	152.723	182.991	181.409	1967.15	9.21024	10.7955	9.24169	8.5658	7.37945	10.5361	8.63651	9.34686	7.76367	9.30231	9.22191
2075	sp|Q96RT1-8|LAP2_HUMAN	ERBB2IP	LAP2_HUMAN Isoform 8 of Protein LAP2	1164	SVSDFNYSRTSPS	24.437	R	R.TM*SVSDFNY#SR.T	1	2	2	70.0853	251.751	113.636	96.4835	49.8666	81.4263	75.5201	69.9916	253.026	281.648	232.579	1576.01	180.55	403.047	254.277	221.699	184.074	219.846	215.136	166.427	253.026	296.634	276.338	2671.06	6.7595	15.0894	9.51973	8.30004	6.89145	8.23069	8.05436	6.23078	9.47287	11.1055	10.3456
1078	sp|Q9UKY7|CDV3_HUMAN	CDV3	CDV3_HUMAN Protein CDV3 homolog	190	QGPPEIYSDTQFP	30.8348	R	K.TPQGPPEIY#SDTQFPSLQSTAK.H	1	2	2	69.9407	160.99	76.2554	75.4007	33.3177	49.9195	49.8469	59.2045	362.892	499.525	520.605	1957.9	180.177	257.74	170.633	173.255	122.987	134.78	142	140.778	362.892	526.104	618.554	2829.9	6.36692	9.10775	6.02965	6.12229	4.34598	4.7627	5.01786	4.97465	12.8235	18.5909	21.8578
3258	sp|P38159|RBMX_HUMAN	RBMX	RBMX_HUMAN RNA-binding motif protein, X chromosome	206	PSRRDVYLSPRDD	48.8739	R	R.DVY#LSPR.D	1	1	1	69.7121	186.831	129.076	124.134	73.5945	72.4376	69.5896	76.1913	124.773	136.837	116.412	1179.59	179.588	299.111	288.826	285.234	271.662	195.578	198.242	181.169	124.773	144.118	138.315	2306.62	7.78579	12.9675	12.5216	12.3659	11.7775	8.47898	8.5945	7.85433	5.40936	6.24804	5.99643
332	sp|Q8NFJ5|RAI3_HUMAN	GPRC5A	RAI3_HUMAN Retinoic acid-induced protein 3	347	HAWPSPYKDYEVK	44.2778	U	R.AHAWPSPY#K.D	1	1	1	69.5516	167.54	103.981	124.337	67.9184	94.0408	83.335	116.838	265.535	267.14	311.335	1671.55	179.175	268.227	232.674	285.699	250.71	253.905	237.399	277.821	265.535	281.355	369.911	2902.41	6.17332	9.24152	8.01658	9.84351	8.63799	8.74807	8.17938	9.57207	9.14877	9.69383	12.745
1664	sp|P15941-2|MUC1_HUMAN	MUC1	MUC1_HUMAN Isoform 2 of Mucin-1	1252	GGSSLSYTNPAVA	17.0091	R	K.VSAGNGGSSLSY#TNPAVAATSANL.-	1	1	1	69.5478	58.7485	36.7692	41.4495	24.4138	35.9305	31.9113	41.3131	122.616	103.11	101.958	667.769	179.165	94.0548	82.2768	95.2422	90.1196	97.0105	90.9068	98.2352	122.616	108.596	121.141	1179.37	15.1917	7.97503	6.97636	8.07572	7.64136	8.22565	7.70812	8.3295	10.3968	9.20803	10.2717
2842	sp|P55795|HNRH2_HUMAN	HNRNPH2	HNRH2_HUMAN Heterogeneous nuclear ribonucleoprotein H2	266	FGRDLNYCFSGMS	87.265	R	R.DLNY#CFSGM*SDHR.Y	1	2	1	69.3418	54.9365	48.7789	36.8096	31.8501	41.9729	35.3865	31.4525	83.544	71.6528	57.2346	562.96	178.635	87.9519	109.15	84.5806	117.569	113.325	100.807	74.7883	83.544	75.4653	68.003	1093.82	16.3313	8.04081	9.97882	7.7326	10.7485	10.3605	9.21604	6.83736	7.63782	6.89925	6.21703
1526	sp|Q9NRY4|RHG35_HUMAN	ARHGAP35	RHG35_HUMAN Rho GTPase-activating protein 35	1105	NEEENIYSVPHDS	17.0091	U	R.NEEENIY#SVPHDSTQGK.I	1	1	1	69.2561	97.6793	88.0102	167.292	84.0581	119.912	155.385	325.755	241.252	272.457	264.878	1885.93	178.414	156.382	196.936	384.402	310.287	323.755	442.65	774.587	241.252	286.954	314.713	3610.33	4.94176	4.33152	5.4548	10.6473	8.59442	8.96746	12.2606	21.4547	6.68228	7.94813	8.71701
1276	sp|O15231-6|ZN185_HUMAN	ZNF185	ZN185_HUMAN Isoform 6 of Zinc finger protein 185	85	TRAPTGYIIRGVF	17.0091	R	R.APTGY#IIR.G	1	1	1	69.2305	148.343	105.759	70.6911	48.1567	80.0481	70.704	69.188	187.673	166.837	117.699	1134.33	178.348	237.494	236.653	162.433	177.763	216.125	201.417	164.517	187.673	175.715	139.843	2077.98	8.58276	11.4291	11.3886	7.81688	8.5546	10.4007	9.69292	7.91714	9.03151	8.45603	6.72975
1867	sp|P29597|TYK2_HUMAN	TYK2	TYK2_HUMAN Non-receptor tyrosine-protein kinase TYK2	433	TADSSHYLCHEVA	33.6572	R	R.LTADSSHY#LCHEVAPPR.L	1	2	2	68.9634	72.753	73.8815	58.6254	61.246	64.7017	61.3443	57.6167	115.664	106.134	131.715	872.645	177.66	116.476	165.321	134.709	226.08	174.691	174.754	137.002	115.664	111.781	156.496	1690.63	10.5085	6.88947	9.77865	7.96795	13.3725	10.3329	10.3366	8.1036	6.84146	6.61181	9.25665
2376	sp|Q9UHB9|SRP68_HUMAN	SRP68	SRP68_HUMAN Signal recognition particle subunit SRP68	364	DQKQRDYILEGEP	1000	R	K.QRDY#ILEGEPGK.V	1	1	1	68.8126	78.2607	88.388	58.4549	45.8949	57.282	64.3914	68.8653	126.121	134.255	135.84	926.565	177.271	125.293	197.782	134.317	169.414	154.658	183.434	163.749	126.121	141.399	161.397	1734.83	10.2183	7.2222	11.4006	7.74234	9.76541	8.91487	10.5736	9.4389	7.26991	8.15055	9.30331
3531	sp|Q14444|CAPR1_HUMAN	CAPRIN1	CAPR1_HUMAN Caprin-1	78	KGKLDDYQERMNK	1000	R	K.GKLDDY#QER.M	1	1	1	68.4089	72.711	84.0699	167.977	65.7591	86.8195	101.999	267.012	176.16	173.816	307.114	1571.85	176.231	116.408	188.119	385.976	242.739	234.408	290.569	634.907	176.16	183.064	364.896	2993.48	5.88718	3.88873	6.2843	12.8939	8.10893	7.83062	9.70673	21.2097	5.8848	6.11543	12.1897
3308	sp|P20042|IF2B_HUMAN	EIF2S2	IF2B_HUMAN Eukaryotic translation initiation factor 2 subunit 2	298	QKDTRLYFLQCET	73.6163	U	R.LY#FLQCETCHSR.C	1	1	1	68.1951	75.39	64.9394	62.2253	45.9509	59.5232	61.9801	89.1794	119.941	101.343	95.9546	844.622	175.681	120.697	145.312	142.98	169.62	160.709	176.565	212.052	119.941	106.735	114.008	1644.3	10.6842	7.34035	8.8373	8.69552	10.3157	9.77372	10.738	12.8962	7.29435	6.4912	6.93352
1029	sp|Q13263|TIF1B_HUMAN	TRIM28	TIF1B_HUMAN Transcription intermediary factor 1-beta	541	GTAPAGTPGAPPL	71.9493	R	R.GAAAAATGQPGTAPAGT#PGAPPLAGMAIVK.E	0	4	4	68.1668	111.613	141.158	291.024	80.2563	96.4119	123.966	381.288	763.608	966.808	977.659	4001.96	175.608	178.689	315.862	668.711	296.253	260.307	353.145	906.635	763.608	1018.25	1161.6	6098.67	2.87944	2.92997	5.17919	10.9649	4.85767	4.26826	5.79052	14.8661	12.5209	16.6963	19.0468
3745	sp|Q15286|RAB35_HUMAN	RAB35	RAB35_HUMAN Ras-related protein Rab-35	5	xxMARDYDHLFKL	1000	R	R.DY#DHLFK.L	1	1	1	67.3017	171.787	97.0814	59.4024	41.2124	73.6295	88.2697	72.7573	209.462	153.677	106.869	1141.45	173.379	275.027	217.235	136.494	152.129	198.796	251.457	173.004	209.462	161.854	126.976	2075.81	8.35234	13.2491	10.465	6.57546	7.32866	9.57676	12.1137	8.33427	10.0906	7.79713	6.11695
939	sp|Q14181|DPOA2_HUMAN	POLA2	DPOA2_HUMAN DNA polymerase alpha subunit B	141	RSVSTRSPHQLLS	58.1673	R	R.S#PHQLLSPSSFSPSATPSQK.Y	0	1	1	66.9541	85.9411	65.0053	78.5248	61.7417	69.7485	71.2682	61.7179	117.667	112.384	86.0358	876.988	172.483	137.589	145.459	180.433	227.909	188.317	203.024	146.754	117.667	118.363	102.223	1740.22	9.91157	7.90642	8.35865	10.3684	13.0966	10.8214	11.6666	8.43305	6.76161	6.80162	5.87413
34	sp|Q9H329-2|E41LB_HUMAN	EPB41L4B	E41LB_HUMAN Isoform 2 of Band 4.1-like protein 4B	493	DDSHFDYVHDQNQ	99.2279	U	K.ASASGDDSHFDY#VHDQNQK.N	1	2	2	66.9104	190.355	94.3198	75.9759	43.5104	71.1228	66.249	65.6883	323.474	348.309	317.663	1663.58	172.371	304.754	211.055	174.577	160.612	192.027	188.726	156.195	323.474	366.842	377.43	2628.06	6.55886	11.5961	8.03082	6.64279	6.11141	7.30681	7.18117	5.94335	12.3085	13.9587	14.3615
721	sp|Q86X29|LSR_HUMAN	LSR	LSR_HUMAN Lipolysis-stimulated lipoprotein receptor	328	IYAPSTYAHLSPA	17.0091	R	K.AATSGVPSIYAPSTY#AHLSPAK.T	1	1	1	66.7122	126.63	44.5985	116.888	67.1999	59.9815	48.8376	82.3257	136.131	237.885	585.781	1572.97	171.86	202.732	99.7959	268.583	248.058	161.947	139.125	195.756	136.131	250.543	695.992	2570.52	6.68582	7.8868	3.88232	10.4486	9.65009	6.30015	5.41234	7.61541	5.29583	9.74676	27.0759
2024	sp|Q6ZSR9|YJ005_HUMAN		YJ005_HUMAN Uncharacterized protein FLJ45252	28	NNLESDYLARDGP	20.1669	U	K.TQNNLESDY#LAR.D	1	1	1	66.4888	65.5551	66.4997	45.5271	40.2387	50.3454	49.7432	47.7606	132.371	111.43	84.7626	760.722	171.285	104.952	148.803	104.612	148.535	135.93	141.705	113.566	132.371	117.359	100.71	1419.83	12.0638	7.39188	10.4804	7.36791	10.4615	9.57369	9.98044	7.99859	9.32301	8.26573	7.09313
2359	sp|O60664|PLIN3_HUMAN	PLIN3	PLIN3_HUMAN Perilipin-3	95	IASASEYAHRGLD	20.1669	R	K.LEPQIASASEY#AHR.G	1	1	1	66.4036	110.602	87.0201	105.339	50.2968	65.8386	65.8477	77.165	135.283	169.099	265.409	1198.3	171.065	177.07	194.721	242.046	185.662	177.76	187.583	183.484	135.283	178.097	315.345	2148.12	7.96351	8.24305	9.06472	11.2678	8.64303	8.27518	8.73242	8.54164	6.29774	8.29083	14.6801
2519	sp|Q9UEU0|VTI1B_HUMAN	VTI1B	VTI1B_HUMAN Vesicle transport through interaction with t-SNAREs homolog 1B	68	MEEELRYAPLSFR	59.2977	R	R.Y#APLSFR.N	1	1	1	66.0195	79.8755	80.1246	109.597	61.2131	86.8218	93.4755	159.85	202.088	217.671	200.698	1357.43	170.076	127.879	179.291	251.831	225.958	234.414	266.287	380.094	202.088	229.253	238.459	2505.63	6.78775	5.10365	7.15553	10.0506	9.01802	9.35549	10.6275	15.1696	8.06536	9.14953	9.51691
1572	sp|Q9Y314|NOSIP_HUMAN	NOSIP	NOSIP_HUMAN Nitric oxide synthase-interacting protein	14	CTAGAVYTYHEKK	48.8739	R	K.NCTAGAVY#TYHEK.K	1	1	1	65.9739	180.288	107.18	95.1606	35.3958	62.8069	47.7005	55.5747	271.601	324.649	198.572	1444.9	169.958	288.636	239.831	218.659	130.658	169.575	135.886	132.147	271.601	341.923	235.932	2334.81	7.27934	12.3623	10.272	9.36518	5.5961	7.26292	5.82001	5.65986	11.6327	14.6446	10.105
1777	sp|Q9P206-2|K1522_HUMAN	KIAA1522	K1522_HUMAN Isoform 2 of Uncharacterized protein KIAA1522	300	RHIDRVYRDDTFV	47.0452	R	R.VY#RDDTFVGR.S	1	2	2	65.6756	185.116	78.3082	70.7645	29.8923	50.4432	44.7355	56.9335	468.456	450.613	616.682	2117.62	169.19	296.366	175.227	162.602	110.342	136.194	127.439	135.378	468.456	474.59	732.707	2988.49	5.66138	9.91692	5.86338	5.44093	3.69225	4.55728	4.26434	4.52997	15.6753	15.8806	24.5176
2256	sp|Q9UQ35|SRRM2_HUMAN	SRRM2	SRRM2_HUMAN Serine/arginine repetitive matrix protein 2	1492	PKALPQTPRPRSR	1000	R	K.ALPQT#PRPR.S	0	1	1	65.6632	57.237	55.0132	40.0971	38.0919	47.3064	43.3495	38.8403	84.9044	77.3961	82.9345	630.834	169.158	91.635	123.101	92.1346	140.61	127.725	123.491	92.3552	84.9044	81.5143	98.5381	1225.17	13.8069	7.47939	10.0477	7.52017	11.4768	10.4251	10.0795	7.53817	6.93003	6.65332	8.04284
388	sp|P00533|EGFR_HUMAN	EGFR	EGFR_HUMAN Epidermal growth factor receptor	998	PTDSNFYRALMDE	24.2431	R	R.MHLPSPTDSNFY#R.A	1	6	5	65.6449	295.395	153.003	121.961	41.8062	115.547	119.297	152.832	685.049	710.307	440.233	2901.08	169.111	472.92	342.369	280.241	154.321	311.97	339.847	363.408	685.049	748.102	523.061	4390.4	3.85183	10.7717	7.79812	6.38304	3.51497	7.10574	7.74068	8.27734	15.6034	17.0395	11.9137
2425	sp|P08238|HS90B_HUMAN	HSP90AB1	HS90B_HUMAN Heat shock protein HSP 90-beta	484	ETQKSIYYITGES	24.437	R	K.SIY#YITGESK.E	1	1	1	65.4773	61.182	55.3105	48.965	43.9929	42.8224	47.305	47.6869	117.922	112.823	88.6523	732.139	168.679	97.9508	123.766	112.511	162.393	115.618	134.759	113.391	117.922	118.826	105.332	1371.15	12.302	7.14371	9.02643	8.20561	11.8436	8.43222	9.82822	8.26978	8.60025	8.66615	7.68202
2611	sp|P42356|PI4KA_HUMAN	PI4KA	PI4KA_HUMAN Phosphatidylinositol 4-kinase alpha	633	KASSVVYSATKDY	24.437	R	K.ASSVVY#SATK.D	1	1	1	65.3681	206.665	129.488	116.332	48.0118	147.569	88.7815	112.585	158.588	144.26	147.776	1365.43	168.398	330.865	289.75	267.305	177.228	398.429	252.915	267.706	158.588	151.936	175.58	2638.7	6.38185	12.539	10.9808	10.1302	6.71649	15.0994	9.58482	10.1454	6.01008	5.758	6.65402
43	sp|O60716|CTND1_HUMAN	CTNND1	CTND1_HUMAN Catenin delta-1	288	LEDDQRSMGYDDL	20.9989	R	R.S#M*GYDDLDYGM*MSDYGTAR.R	0	2	2	65.3323	100.831	57.5151	50.1046	40.8341	51.387	55.7547	53.5053	130.148	125.616	109.285	840.312	168.305	161.427	128.699	115.13	150.733	138.742	158.83	127.226	130.148	132.3	129.846	1541.39	10.9191	10.4729	8.34955	7.46923	9.77904	9.00112	10.3044	8.254	8.44356	8.58317	8.42398
2526	sp|Q9NYF8|BCLF1_HUMAN	BCLAF1	BCLF1_HUMAN Bcl-2-associated transcription factor 1	284	GNGSSRYSPSQNS	17.0091	R	R.Y#SPSQNS#PIHHIPSR.R	1	1	1	65.1372	74.0415	70.2404	46.5976	67.8671	65.7922	68.454	60.4399	94.9361	73.4272	101.483	788.417	167.803	118.538	157.174	107.071	250.521	177.635	195.007	143.715	94.9361	77.3342	120.577	1610.31	10.4205	7.36121	9.76044	6.64911	15.5573	11.0311	12.1099	8.92469	5.89551	4.80244	7.48779
1874	sp|Q6P1N0|C2D1A_HUMAN	CC2D1A	C2D1A_HUMAN Coiled-coil and C2 domain-containing protein 1A	207	PASTPTYSPAPTQ	17.0091	R	K.GPASTPTY#SPAPTQPAPR.I	1	1	1	65.1306	54.6465	53.7538	45.4619	34.7366	33.7522	44.9551	37.3208	79.1323	83.7023	85.5165	618.109	167.786	87.4876	120.282	104.462	128.225	91.129	128.065	88.7422	79.1323	88.156	101.606	1185.07	14.1583	7.38247	10.1498	8.81479	10.82	7.68974	10.8065	7.48834	6.67742	7.43887	8.57382
789	sp|P50402|EMD_HUMAN	EMD	EMD_HUMAN Emerin	59	SSAASSYSFSDLN	17.0091	U	R.LSPPSSSAASSY#SFSDLNSTR.G	1	1	1	65.0536	70.077	52.1323	47.1845	44.9552	51.007	40.3574	41.3175	94.3004	87.6289	93.3916	687.405	167.588	112.191	116.654	108.42	165.945	137.716	114.968	98.2455	94.3004	92.2915	110.963	1319.28	12.7029	8.50398	8.84223	8.21811	12.5784	10.4387	8.71441	7.4469	7.14786	6.99559	8.41084
1895	sp|Q13113|PDZ1I_HUMAN	PDZK1IP1	PDZ1I_HUMAN PDZK1-interacting protein 1	99	SEHENAYENVPEE	28.2181	U	R.SSEHENAY#ENVPEEEGK.V	1	1	1	65.0433	68.128	46.1504	53.0803	31.7298	33.4136	25.4736	39.0938	108.287	121.586	75.7888	667.775	167.561	109.071	103.269	121.967	117.125	90.2148	72.5676	92.9579	108.287	128.055	90.0481	1201.12	13.9503	9.08076	8.59767	10.1544	9.75131	7.51086	6.04164	7.73924	9.0155	10.6613	7.49698
2179	sp|Q9BZZ5-2|API5_HUMAN	API5	API5_HUMAN Isoform 2 of Apoptosis inhibitor 5	497	NLGNFNYERSLQG	110.807	R	K.YSSNLGNFNY#ER.S	1	2	2	64.7344	203.644	115.129	132.986	45.7704	81.4561	64.2303	93.7233	300.431	429.566	507.508	2039.18	166.765	326.028	257.62	305.573	168.954	219.927	182.975	222.857	300.431	452.422	602.993	3206.54	5.20078	10.1676	8.03419	9.52965	5.26904	6.85869	5.7063	6.95007	9.3693	14.1093	18.8051
2995	sp|Q86VE9-4|SERC5_HUMAN	SERINC5	SERC5_HUMAN Isoform 4 of Serine incorporator 5	345	DALQGRYAAPELE	1000	R	R.Y#AAPELEIAR.C	1	1	1	64.7033	73.8432	79.4452	60.8848	54.8861	115.678	72.7295	94.8015	86.4818	95.039	82.6485	881.141	166.685	118.221	177.771	139.9	202.603	312.325	207.187	225.421	86.4818	100.096	98.1983	1834.89	9.08421	6.44295	9.68836	7.62445	11.0417	17.0215	11.2915	12.2853	4.71319	5.45515	5.35173
1990	sp|P04920|B3A2_HUMAN	SLC4A2	B3A2_HUMAN Anion exchange protein 2	73	GEEDFEYHRQSSH	140.089	R	R.SYGEEDFEY#HR.Q	1	2	1	64.4554	88.1825	59.7679	52.3556	47.6532	49.5735	57.2571	59.8122	139.698	124.815	100.587	844.158	166.047	141.178	133.74	120.302	175.904	133.846	163.11	142.223	139.698	131.456	119.512	1567.02	10.5964	9.00935	8.53468	7.67714	11.2254	8.54144	10.409	9.07601	8.91492	8.38897	7.62673
2052	sp|Q04837|SSBP_HUMAN	SSBP1	SSBP_HUMAN Single-stranded DNA-binding protein, mitochondrial	101	RDVAYQYVKKGSR	17.0091	R	R.DVAYQY#VK.K	1	1	1	64.2702	137.631	118.209	128.315	64.6316	111.113	86.7049	105.115	308.339	297.566	310.192	1732.09	165.569	220.344	264.511	294.84	238.577	300	246.999	249.944	308.339	313.399	368.553	2971.07	5.57271	7.4163	8.90287	9.92367	8.03	10.0974	8.31346	8.41256	10.378	10.5483	12.4047
1272	sp|O15231-6|ZN185_HUMAN	ZNF185	ZN185_HUMAN Isoform 6 of Zinc finger protein 185	613	ILFVKEYVNASEV	71.0667	R	K.EY#VNASEVSSGKPVSAR.Y	1	2	2	63.9016	424.062	243.704	131.133	59.1321	220.062	151.922	143.046	602.022	534.757	281.202	2854.94	164.62	678.912	545.324	301.316	218.277	594.155	432.784	340.137	602.022	563.211	334.109	4774.87	3.44763	14.2185	11.4207	6.31046	4.57137	12.4434	9.06379	7.12349	12.6081	11.7953	6.99724
1387	sp|Q8N4C8|MINK1_HUMAN	MINK1	MINK1_HUMAN Misshapen-like kinase 1	906	HADSNGYTNLPDV	19.8431	R	R.NLLHADSNGY#TNLPDVVQPSHSPTENSK.G	1	2	2	63.7161	176.025	106.985	75.1588	34.2411	80.9888	68.3143	72.9686	416.942	376.166	194.124	1665.63	164.142	281.812	239.396	172.699	126.395	218.665	194.609	173.506	416.942	396.181	230.648	2615	6.27695	10.7768	9.15475	6.60418	4.83348	8.36197	7.44205	6.63504	15.9443	15.1504	8.82019
1162	sp|Q15464|SHB_HUMAN	SHB	SHB_HUMAN SH2 domain-containing adapter protein B	114	AMCRLDYCGGSGE	44.2778	R	R.LDY#CGGSGEPGGVQR.A	1	2	2	63.3373	80.0368	63.0364	44.4046	36.3362	49.3025	46.5845	46.4332	140.429	118.857	103.282	792.04	163.166	128.137	141.054	102.032	134.129	133.114	132.707	110.41	140.429	125.182	122.714	1433.07	11.3858	8.9414	9.84273	7.11983	9.35956	9.2887	9.26029	7.70441	9.79916	8.73519	8.56297
2141	sp|O00459|P85B_HUMAN	PIK3R2	P85B_HUMAN Phosphatidylinositol 3-kinase regulatory subunit beta	467	DQLYEEYTRTSQE	24.437	R	R.EYDQLYEEY#TR.T	1	3	3	63.1951	104.17	87.8996	106.972	56.9824	113.987	127.523	105.02	245.976	197.07	178.907	1387.7	162.8	166.773	196.689	245.798	210.341	307.758	363.279	249.719	245.976	207.556	212.568	2569.26	6.33645	6.49111	7.65547	9.56688	8.18685	11.9785	14.1395	9.71948	9.57383	8.07845	8.27351
1110	sp|Q7Z589|EMSY_HUMAN	EMSY	EMSY_HUMAN Protein EMSY	173	KSPRPASPASNVV	14.0618	R	K.SPRPAS#PASNVVVLPSGSTVYVK.S	0	1	1	63.0133	79.0195	91.4374	81.1965	64.4189	107.052	101.725	120.353	84.0637	83.1112	81.667	957.057	162.331	126.508	204.605	186.572	237.792	289.033	289.787	286.178	84.0637	87.5334	97.0322	2051.44	7.91306	6.1668	9.97375	9.09472	11.5915	14.0893	14.1261	13.9501	4.0978	4.26693	4.72996
2525	sp|Q9NYF8|BCLF1_HUMAN	BCLAF1	BCLF1_HUMAN Bcl-2-associated transcription factor 1	290	YSPSQNSPIHHIP	33.6572	R	R.YSPSQNS#PIHHIPSRR.S	0	1	1	62.9899	89.5172	72.1665	61.6142	43.5605	72.5489	73.348	70.7282	122.478	110.199	104.217	883.367	162.271	143.315	161.484	141.576	160.797	195.878	208.949	168.179	122.478	116.062	123.824	1704.81	9.51842	8.40648	9.47222	8.30451	9.43193	11.4897	12.2564	9.86494	7.18423	6.80792	7.26322
45	sp|O60716|CTND1_HUMAN	CTNND1	CTND1_HUMAN Catenin delta-1	174	SSVSNNYIQTLGR	18.6027	R	R.TVQPVAM*GPDGLPVDASSVSNNY#IQTLGR.D	1	7	6	62.8959	406.143	131.592	107.554	28.0974	88.5236	63.6526	60.4984	481.465	569.595	430.95	2430.97	162.029	650.224	294.457	247.135	103.717	239.009	181.329	143.854	481.465	599.902	512.03	3615.15	4.48194	17.9861	8.14508	6.83609	2.86896	6.6113	5.01581	3.97921	13.318	16.5941	14.1634
1009	sp|Q09666|AHNK_HUMAN	AHNAK	AHNK_HUMAN Neuroblast differentiation-associated protein AHNAK	5836	SKSKGHYEVTGSD	73.3109	U	K.GHY#EVTGSDDETGK.L	1	6	3	62.8497	352.049	190.467	149.836	40.4878	133.188	126.643	156.453	486.132	469.281	290.742	2458.13	161.91	563.622	426.198	344.291	149.454	359.601	360.771	372.017	486.132	494.251	345.443	4063.69	3.98431	13.8697	10.488	8.47239	3.67779	8.84912	8.87791	9.15465	11.9628	12.1626	8.50073
2064	sp|Q8IY92|SLX4_HUMAN	SLX4	SLX4_HUMAN Structure-specific endonuclease subunit SLX4	467	KKKPPVSPPLLLV	76.2215	R	K.KKPPVS#PPLLLVQDSETTGR.Q	0	1	1	62.7533	72.1913	71.2714	67.9382	60.9115	65.828	71.3035	70.94	99.5901	86.1124	110.785	839.625	161.662	115.576	159.481	156.107	224.845	177.732	203.125	168.682	99.5901	90.6944	131.629	1689.12	9.57075	6.84239	9.44162	9.24192	13.3113	10.5221	12.0254	9.98639	5.89596	5.36931	7.79274
1537	sp|O60292|SI1L3_HUMAN	SIPA1L3	SI1L3_HUMAN Signal-induced proliferation-associated 1-like protein 3	1411	MGSRVGYPAQVYK	65.4396	R	R.VGY#PAQVYK.T	1	1	1	62.6861	154.669	200.798	196.188	51.4716	158.013	187.752	191.387	459.658	475.274	340.858	2478.76	161.489	247.621	449.315	450.799	189.999	426.628	534.856	455.084	459.658	500.563	404.989	4281	3.77222	5.78419	10.4956	10.5302	4.4382	9.96561	12.4937	10.6303	10.7372	11.6927	9.46014
1464	sp|Q5T0Z8|CF132_HUMAN	C6orf132	CF132_HUMAN Uncharacterized protein C6orf132	1142	APGSADYGFAPAA	87.265	U	K.APGSADY#GFAPAAGR.S	1	2	2	62.5814	226.177	116.591	103.954	36.4071	79.0768	65.2844	65.3493	260.006	270.353	231.54	1517.32	161.219	362.103	260.889	238.864	134.391	213.503	185.978	155.389	260.006	284.738	275.102	2532.18	6.3668	14.3	10.3029	9.43312	5.30732	8.43158	7.34456	6.13656	10.2681	11.2448	10.8642
2482	sp|P46108-2|CRK_HUMAN	CRK	CRK_HUMAN Isoform Crk-I of Adapter molecule crk	190	VPYVEKYRPASAS	36.5564	U	K.Y#RPASASVSALIGGR.-	1	1	1	62.5375	70.7619	64.1915	63.5897	36.2586	58.0898	64.6063	71.8608	157.953	150.919	125.885	926.653	161.106	113.288	143.638	146.116	133.843	156.839	184.046	170.872	157.953	158.949	149.57	1676.22	9.61125	6.75854	8.56918	8.71698	7.9848	9.35673	10.9798	10.1939	9.42315	9.4826	8.92306
2100	sp|Q6NUM9|RETST_HUMAN	RETSAT	RETST_HUMAN All-trans-retinol 13,14-reductase	486	GKRGSDYETFKNS	31.2747	R	K.RGSDY#ETFK.N	1	2	2	62.3783	293.074	361.458	416.246	81.1172	309.441	355.542	554.914	742.028	768.911	437.059	4382.17	160.696	469.203	808.818	956.446	299.431	835.473	1012.84	1319.49	742.028	809.824	519.289	7933.54	2.02552	5.91418	10.1949	12.0557	3.77425	10.5309	12.7666	16.6318	9.35305	10.2076	6.54549
3701	sp|Q8N6H7|ARFG2_HUMAN	ARFGAP2	ARFG2_HUMAN ADP-ribosylation factor GTPase-activating protein 2	278	ASMRLAYQELQID	1000	R	R.LAY#QELQIDR.K	1	1	1	62.3679	67.8436	53.3724	53.5696	38.0501	43.7425	46.5287	42.9887	100.127	107.91	116.685	733.186	160.669	108.616	119.429	123.092	140.456	118.102	132.548	102.219	100.127	113.652	138.639	1357.55	11.8352	8.00088	8.7974	9.06719	10.3463	8.69967	9.76378	7.52971	7.37558	8.37184	10.2124
3536	sp|P50552|VASP_HUMAN	VASP	VASP_HUMAN Vasodilator-stimulated phosphoprotein	39	FSRVQIYHNPTAN	84.6094	R	R.VQIY#HNPTANSFR.V	1	1	1	61.8996	58.4845	52.9996	72.0293	51.9246	48.7552	48.442	66.9713	71.2692	76.3749	69.705	678.855	159.462	93.6322	118.595	165.508	191.671	131.636	137.998	159.246	71.2692	80.4387	82.8196	1392.28	11.4534	6.72512	8.51804	11.8876	13.7668	9.45475	9.91169	11.4378	5.11889	5.7775	5.9485
874	sp|Q8IYB3|SRRM1_HUMAN	SRRM1	SRRM1_HUMAN Serine/arginine repetitive matrix protein 1	402	RRRHRPSPPATPP	1000	R	R.HRPS#PPAT#PPPK.T	0	2	1	61.7633	60.0412	73.4687	52.009	72.2993	75.6694	84.4215	75.7796	63.2297	51.9358	44.4104	715.028	159.111	96.1244	164.397	119.506	266.881	204.303	240.494	180.19	63.2297	54.6992	52.7659	1601.7	9.93389	6.00139	10.2639	7.46116	16.6624	12.7554	15.0149	11.2499	3.94766	3.41507	3.29437
2849	sp|Q86VM9|ZCH18_HUMAN	ZC3H18	ZCH18_HUMAN Zinc finger CCCH domain-containing protein 18	398	YTETEPYHNYRER	47.8083	R	R.VQYTETEPY#HNYR.E	1	1	1	61.7546	60.9159	61.551	55.7659	46.0204	56.5559	59.7257	63.8608	78.8767	59.6826	62.4287	667.138	159.089	97.5247	137.73	128.138	169.877	152.698	170.142	151.849	78.8767	62.8582	74.1743	1382.96	11.5035	7.05189	9.95907	9.26552	12.2836	11.0414	12.3028	10.9801	5.70348	4.5452	5.36345
2670	sp|Q9H1B7|I2BPL_HUMAN	IRF2BPL	I2BPL_HUMAN Interferon regulatory factor 2-binding protein-like	69	CFQDGRSPGPPPP	1000	U	R.AHGCFQDGRS#PGPPPPVGVK.T	0	1	1	61.5761	60.0363	91.9825	93.481	39.6479	36.3417	53.3733	38.0891	97.314	98.0093	80.9567	750.808	158.629	96.1166	205.825	214.799	146.354	98.1207	152.046	90.5691	97.314	103.224	96.1882	1459.19	10.8711	6.587	14.1055	14.7205	10.0298	6.72434	10.4199	6.20682	6.66906	7.0741	6.59191
3622	sp|Q9UP95|S12A4_HUMAN	SLC12A4	S12A4_HUMAN Solute carrier family 12 member 4	61	ASRGIDYYDRNLA	24.437	R	R.GIDY#YDR.N	1	1	1	61.1442	71.696	59.8688	71.5533	39.6013	58.276	45.5786	66.8805	246.425	226.408	188.523	1135.95	157.516	114.783	133.966	164.414	146.182	157.342	129.841	159.03	246.425	238.455	223.992	1871.95	8.41458	6.13176	7.15649	8.78306	7.80908	8.40526	6.93616	8.49542	13.1641	12.7383	11.9657
1333	sp|Q9NWQ8|PHAG1_HUMAN	PAG1	PHAG1_HUMAN Phosphoprotein associated with glycosphingolipid-enriched microdomains 1	341	TVPESTYTSIQGD	17.0091	U	K.SGQSLTVPESTY#TSIQGDPQR.S	1	1	1	61.0077	40.007	16.2042	20.3753	20.2016	13.0716	9.28448	9.55128	41.2142	45.9176	47.1318	323.967	157.165	64.0501	36.2593	46.8181	74.5709	35.2925	26.449	22.7112	41.2142	48.3608	55.9993	608.89	25.8117	10.5192	5.95499	7.68909	12.247	5.79621	4.3438	3.72994	6.76873	7.94245	9.19695
335	sp|P22626|ROA2_HUMAN	HNRNPA2B1	ROA2_HUMAN Heterogeneous nuclear ribonucleoproteins A2/B1	336	PYGGGNYGPGGSG	84.3587	R	R.NMGGPYGGGNY#GPGGSGGSGGYGGR.S	1	3	3	60.8282	184.918	110.308	115.213	50.3565	69.4793	58.1021	56.3133	130.269	151.431	109.441	1096.66	156.702	296.049	246.83	264.736	185.883	187.59	165.517	133.903	130.269	159.488	130.032	2057	7.618	14.3923	11.9995	12.87	9.0366	9.11961	8.04654	6.50963	6.33294	7.75344	6.32145
786	sp|P50402|EMD_HUMAN	EMD	EMD_HUMAN Emerin	49	TQRRRLSPPSSSA	45.026	U	R.RLS#PPSSSAASSYSFSDLNSTR.G	0	1	1	60.1535	86.5239	78.344	121.621	40.3591	52.8674	56.6977	50.6457	87.8134	81.454	88.6713	805.15	154.964	138.522	175.307	279.458	148.979	142.739	161.517	120.426	87.8134	85.788	105.354	1600.87	9.68	8.65296	10.9507	17.4567	9.30615	8.91635	10.0893	7.52256	5.48536	5.35884	6.58107
1814	sp|Q9HB21|PKHA1_HUMAN	PLEKHA1	PKHA1_HUMAN Pleckstrin homology domain-containing family A member 1	345	MEKRGFYESLAKV	59.2977	U	K.RGFY#ESLAK.V	1	1	1	60.0725	97.3383	62.5512	42.2101	33.718	50.7581	47.4535	42.2525	261.906	279.668	306.77	1284.7	154.756	155.836	139.968	96.9899	124.465	137.044	135.182	100.469	261.906	294.548	364.487	1965.65	7.87299	7.92797	7.12069	4.93424	6.33199	6.97195	6.87723	5.11122	13.3242	14.9848	18.5428
2298	sp|P46059|S15A1_HUMAN	SLC15A1	S15A1_HUMAN Solute carrier family 15 member 1	697	LEKSNPYFMSGAN	16.062	U	K.SNPY#FM*SGANSQK.Q	1	1	1	59.6104	59.218	39.4747	38.741	44.5672	37.1844	35.0729	37.8231	66.4827	60.1853	52.458	530.818	153.565	94.8066	88.3306	89.0185	164.513	100.396	99.9132	89.9365	66.4827	63.3877	62.3277	1072.68	14.3161	8.83831	8.2346	8.29872	15.3367	9.35936	9.31438	8.38431	6.19783	5.9093	5.81048
1877	sp|Q7Z699|SPRE1_HUMAN	SPRED1	SPRE1_HUMAN Sprouty-related, EVH1 domain-containing protein 1	292	DSKKSDYLYSCGD	31.2747	U	K.KSDY#LYSCGDETK.L	1	1	1	59.5567	324.994	196.826	156.272	39.6631	163.292	126.319	97.2173	403.184	378.241	295.424	2240.99	153.427	520.307	440.428	359.08	146.41	440.878	359.849	231.165	403.184	398.367	351.006	3804.1	4.03319	13.6775	11.5777	9.4393	3.84874	11.5895	9.4595	6.07674	10.5987	10.472	9.22705
348	sp|P51991|ROA3_HUMAN	HNRNPA3	ROA3_HUMAN Heterogeneous nuclear ribonucleoprotein A3	145	EYNLRDYFEKYGK	84.3587	R	K.EDTEEYNLRDY#FEK.Y	1	1	1	59.4309	64.8141	70.8135	119.537	45.9412	67.7163	93.1643	179.586	170.753	151.729	201.783	1225.27	153.103	103.766	158.456	274.672	169.584	182.83	265.4	427.023	170.753	159.803	239.747	2305.14	6.64181	4.5015	6.87404	11.9156	7.35681	7.93143	11.5134	18.5248	7.4075	6.93246	10.4006
3659	sp|Q15052|ARHG6_HUMAN	ARHGEF6	ARHG6_HUMAN Rho guanine nucleotide exchange factor 6	488	SASPRMSGFIYQG	20.1669	R	R.MS#GFIYQGK.L	0	1	1	59.2521	51.6422	47.7853	44.379	46.5371	46.0605	42.1457	46.7168	82.5426	71.9098	76.8319	615.803	152.642	82.6777	106.927	101.974	171.784	124.361	120.062	111.084	82.5426	75.736	91.2874	1221.08	12.5006	6.77088	8.75676	8.35111	14.0683	10.1845	9.83244	9.09723	6.75982	6.20239	7.47597
1134	sp|P01130|LDLR_HUMAN	LDLR	LDLR_HUMAN Low-density lipoprotein receptor	845	CHNQDGYSYPSRQ	13.3795	R	K.TTEDEVHICHNQDGY#SYPSR.Q	1	1	1	59.1755	104.696	83.5778	91.1558	37.944	58.8923	65.3141	81.5252	222.31	268.911	160.515	1234.02	152.445	167.615	187.018	209.457	140.064	159.006	186.062	193.852	222.31	283.22	190.714	2091.76	7.28786	8.01309	8.94069	10.0134	6.69599	7.60153	8.895	9.26741	10.6279	13.5398	9.1174
3437	sp|Q8TDM6|DLG5_HUMAN	DLG5	DLG5_HUMAN Disks large homolog 5	429	EERDAVYSEYKLI	48.8739	R	R.DAVY#SEYK.L	1	1	1	59.068	56.818	78.1663	98.1837	33.2571	88.1823	108.844	128.84	143.361	141.483	126.262	1062.46	152.168	90.9641	174.909	225.605	122.763	238.087	310.067	306.357	143.361	149.011	150.017	2063.31	7.37494	4.40865	8.47711	10.9341	5.94982	11.5391	15.0276	14.8479	6.94813	7.22196	7.27069
2203	sp|P55011|S12A2_HUMAN	SLC12A2	S12A2_HUMAN Solute carrier family 12 member 2	275	RDAVVTYTAESKG	24.437	R	R.DAVVTY#TAESK.G	1	1	1	59.0302	210.657	176.545	338.177	59.8118	195.285	144.064	360.572	289.128	254.13	327.581	2414.98	152.071	337.257	395.046	777.059	220.786	527.259	410.401	857.375	289.128	267.652	389.214	4623.25	3.28926	7.2948	8.54478	16.8076	4.77556	11.4045	8.87691	18.5449	6.2538	5.78926	8.41862
1602	sp|Q9H0E2|TOLIP_HUMAN	TOLLIP	TOLIP_HUMAN Toll-interacting protein	83	CRLRLGYAVYETP	23.6238	R	R.LGY#AVYETPTAHNGAK.N	1	1	1	58.4427	82.5059	87.0699	75.5263	39.9564	68.9457	72.6888	84.4302	164.381	184.897	94.4304	1013.27	150.557	132.09	194.832	173.543	147.493	186.149	207.071	200.76	164.381	194.735	112.197	1863.81	8.07791	7.08709	10.4534	9.31122	7.91351	9.98759	11.1101	10.7715	8.81965	10.4482	6.01977
1694	sp|P51610-4|HCFC1_HUMAN	HCFC1	HCFC1_HUMAN Isoform 4 of Host cell factor 1	411	TAATATSPTPNPV	13.4341	R	K.YDIPATAATATS#PTPNPVPSVPANPPK.S	0	1	1	58.3792	74.9283	59.5765	56.4162	49.4533	52.6611	62.0724	51.0279	92.8322	83.4741	81.1844	722.006	150.393	119.958	133.312	129.632	182.549	142.182	176.828	121.335	92.8322	87.9157	96.4588	1433.4	10.4921	8.36881	9.3004	9.04373	12.7354	9.91924	12.3363	8.46487	6.47638	6.13338	6.72939
1639	sp|Q13813-2|SPTN1_HUMAN	SPTAN1	SPTN1_HUMAN Isoform 2 of Spectrin alpha chain, non-erythrocytic 1	1020	GFVPAAYVKKLDP	1000	R	R.QGFVPAAY#VK.K	1	1	1	58.2376	78.2584	78.7161	69.4167	47.5455	79.5253	79.5641	100.237	102.331	88.5748	171.207	953.614	150.029	125.29	176.139	159.505	175.506	214.714	226.657	238.346	102.331	93.2878	203.419	1865.22	8.04346	6.71714	9.44333	8.55151	9.40941	11.5114	12.1517	12.7784	5.48626	5.00143	10.9059
3498	sp|Q9BZL6|KPCD2_HUMAN	PRKD2	KPCD2_HUMAN Serine/threonine-protein kinase D2	378	AQSSLGYIPLMRV	87.265	R	K.AQSSLGY#IPLM*R.V	1	2	1	58.1934	44.9986	35.9628	32.6406	29.6226	28.5956	31.3208	32.7566	61.0194	58.7557	63.9312	477.797	149.915	72.0415	80.4723	75.0012	109.347	77.2064	89.2246	77.8893	61.0194	61.882	75.9595	929.958	16.1206	7.74675	8.65333	8.06501	11.7583	8.30214	9.59448	8.37557	6.56152	6.65428	8.16806
2732	sp|P62736|ACTA_HUMAN	ACTA2	ACTA_HUMAN Actin, aortic smooth muscle	71	GILTLKYPIEHGI	34.2061	R	K.Y#PIEHGIITNWDDMEK.I	1	1	1	57.7383	48.9	37.8695	51.7814	51.3532	42.8614	35.8301	49.6813	69.0365	67.7325	51.9236	564.708	148.742	78.2877	84.7388	118.983	189.562	115.723	102.07	118.133	69.0365	71.3364	61.6927	1158.31	12.8414	6.7588	7.31575	10.2721	16.3655	9.99075	8.81204	10.1988	5.96012	6.15868	5.32611
2148	sp|P60709|ACTB_HUMAN	ACTB	ACTB_HUMAN Actin, cytoplasmic 1	198	ILTERGYSFTTTA	24.437	R	R.GY#SFTTTAER.E	1	1	1	57.536	98.8701	146.715	251.338	45.5236	126.201	171.658	357.762	376.409	371.601	436.377	2439.99	148.221	158.289	328.298	577.521	168.043	340.736	489.007	850.694	376.409	391.374	518.479	4347.07	3.40968	3.64127	7.55217	13.2853	3.86566	7.8383	11.2491	19.5694	8.6589	9.00316	11.9271
1941	sp|O95758-4|PTBP3_HUMAN	PTBP3	PTBP3_HUMAN Isoform 4 of Polypyrimidine tract-binding protein 3	133	LRSQPVYIQYSNH	104.477	R	R.SQPVY#IQYSNHR.E	1	1	1	57.4749	63.345	50.4371	42.4514	40.9622	46.3149	47.7005	45.8966	76.9059	71.2762	100.633	643.398	148.064	101.414	112.861	97.5443	151.205	125.048	135.886	109.134	76.9059	75.0688	119.567	1252.7	11.8196	8.09563	9.00942	7.78675	12.0704	9.98228	10.8475	8.71192	6.13922	5.99257	9.54476
526	sp|Q12965|MYO1E_HUMAN	MYO1E	MYO1E_HUMAN Unconventional myosin-Ie	961	APPPPGYHQNGVI	1000	U	R.AAPPPPGY#HQNGVIR.N	1	1	1	57.1569	48.9108	62.4619	28.8654	33.482	40.0745	46.2218	33.1686	70.4191	53.5205	41.97	516.251	147.245	78.3049	139.768	66.3265	123.593	108.199	131.673	78.8689	70.4191	56.3682	49.8664	1050.63	14.0148	7.45312	13.3032	6.31301	11.7637	10.2984	12.5328	7.5068	6.70254	5.36517	4.74632
3348	sp|P10809|CH60_HUMAN	HSPD1	CH60_HUMAN 60 kDa heat shock protein, mitochondrial	227	RGYISPYFINTSK	17.0091	R	R.GYISPY#FINTSK.G	1	1	1	57.1093	74.4539	64.5432	57.9242	64.8518	66.6045	63.6892	72.6301	81.6959	83.8454	81.5595	768.907	147.122	119.199	144.425	133.097	239.39	179.828	181.433	172.701	81.6959	88.3067	96.9045	1584.1	9.28739	7.52468	9.11716	8.40206	15.112	11.3521	11.4534	10.9021	5.15723	5.57456	6.11731
1815	sp|Q58DX5|NADL2_HUMAN	NAALADL2	NADL2_HUMAN Inactive N-acetylated-alpha-linked acidic dipeptidase-like protein 2	106	LQEESDYITHYTR	59.2977	R	R.LQEESDY#ITHYTR.S	1	2	2	57.0253	156.053	110.687	154.384	63.9984	103.608	86.968	141.832	186.93	223.064	273.743	1558.29	146.906	249.837	247.679	354.741	236.24	279.734	247.749	337.251	186.93	234.933	325.247	2847.25	5.15957	8.77469	8.6989	12.4591	8.29713	9.82474	8.70134	11.8448	6.56529	8.25124	11.4232
2815	sp|Q86Z02|HIPK1_HUMAN	HIPK1	HIPK1_HUMAN Homeodomain-interacting protein kinase 1	352	KAVCSTYLQSRYY	30.8348	R	K.AVCSTY#LQSR.Y	1	1	1	56.9812	57.6091	56.6818	49.5686	50.4866	47.1611	46.894	50.9525	41.1062	40.071	35.887	533.399	146.792	92.2307	126.834	113.898	186.363	127.332	133.588	121.156	41.1062	42.2031	42.639	1174.14	12.502	7.85515	10.8023	9.70053	15.8723	10.8447	11.3775	10.3187	3.50095	3.59438	3.6315
901	sp|Q15758|AAAT_HUMAN	SLC1A5	AAAT_HUMAN Neutral amino acid transporter B(0)	524	NPLLKHYRGPAGD	88.8188	R	K.HY#RGPAGDATVASEK.E	1	1	1	56.9659	179.973	134.616	130.447	35.5817	93.7613	68.9476	176.809	232.59	209.278	143.615	1462.58	146.752	288.132	301.223	299.74	131.344	253.15	196.413	420.419	232.59	220.413	170.635	2660.81	5.51532	10.8287	11.3207	11.265	4.93624	9.51402	7.3817	15.8004	8.74131	8.28368	6.41291
2793	sp|P29350-3|PTN6_HUMAN	PTPN6	PTN6_HUMAN Isoform 2 of Tyrosine-protein phosphatase non-receptor type 6	566	KHKEDVYENLHTK	84.3587	R	K.EDVY#ENLHTK.N	1	1	1	56.6523	167.413	64.3675	47.8792	26.3815	42.0449	40.7511	48.5689	342.068	351.797	327.089	1515.01	145.945	268.023	144.032	110.016	97.3829	113.519	116.089	115.488	342.068	370.515	388.629	2211.71	6.59873	12.1184	6.51226	4.97427	4.40306	5.13264	5.24884	5.22167	15.4662	16.7525	17.5714
1525	sp|Q9NRY4|RHG35_HUMAN	ARHGAP35	RHG35_HUMAN Rho GTPase-activating protein 35	1058	TKGDLSYLDQGHR	17.0091	U	K.GDLSY#LDQGHR.D	1	1	1	56.6038	45.2559	50.3309	27.0501	25.2131	37.736	31.574	21.942	71.0727	56.5692	61.4517	484.799	145.82	72.4535	112.623	62.1554	93.07	101.885	89.9459	52.174	71.0727	59.5792	73.0135	933.792	15.6159	7.75906	12.0608	6.65624	9.96689	10.9109	9.63232	5.58733	7.61119	6.38035	7.81903
2653	sp|O95049-2|ZO3_HUMAN	TJP3	ZO3_HUMAN Isoform 2 of Tight junction protein ZO-3	188	RSPGGGSEANGLA	15.3812	R	R.RSPGGGS#EANGLALVSGFK.R	0	1	1	56.5598	54.6999	51.1045	45.9697	58.4932	61.7781	55.6098	57.5021	87.5179	75.6142	81.618	686.467	145.706	87.5731	114.354	105.629	215.918	166.797	158.417	136.73	87.5179	79.6375	96.9739	1395.25	10.443	6.2765	8.19593	7.57056	15.4752	11.9546	11.354	9.79962	6.27254	5.70774	6.95027
37	sp|O60716|CTND1_HUMAN	CTNND1	CTND1_HUMAN Catenin delta-1	193	NGGPGPYVGQAGT	87.265	R	K.NGNGGPGPY#VGQAGTATLPR.N	1	2	2	55.49	191.609	80.8458	50.4466	34.4133	53.6351	40.1526	47.4463	237.97	257.23	125.757	1175	142.95	306.761	180.905	115.916	127.031	144.812	114.384	112.819	237.97	270.917	149.418	1903.88	7.50836	16.1124	9.50189	6.08838	6.67223	7.60612	6.00794	5.92573	12.4992	14.2297	7.84806
485	sp|Q9H4G0|E41L1_HUMAN	EPB41L1	E41L1_HUMAN Band 4.1-like protein 1	68	DMEEKDYSEADGL	24.437	R	K.DY#SEADGLSER.T	1	2	2	55.2505	209.941	100.643	67.291	21.6628	76.4903	62.7769	63.278	225.179	221.196	176.779	1280.49	142.333	336.11	225.204	154.621	79.9649	206.52	178.835	150.464	225.179	232.966	210.039	2142.23	6.64416	15.6897	10.5126	7.21772	3.73278	9.64039	8.34804	7.02368	10.5114	10.8749	9.80466
2825	sp|Q9C0D5|TANC1_HUMAN	TANC1	TANC1_HUMAN Protein TANC1	1827	KTVSHLYQESISK	45.026	R	K.TVSHLY#QESISK.Q	1	1	1	55.2044	103.658	67.3484	76.753	38.4915	58.6287	74.2663	80.6255	228.505	259.23	196.692	1239.4	142.215	165.954	150.702	176.362	142.085	158.294	211.565	191.713	228.505	273.024	233.699	2074.12	6.85663	8.00118	7.26585	8.50299	6.8504	7.63188	10.2002	9.24311	11.017	13.1634	11.2674
1661	sp|Q03135|CAV1_HUMAN	CAV1	CAV1_HUMAN Caveolin-1	6	xMSGGKYVDSEGH	73.3109	U	K.Y#VDSEGHLYTVPIR.E	1	2	2	55.0923	357.968	235.978	166.419	60.9889	144.116	127.061	172.85	724.154	717.322	661.281	3423.23	141.926	573.098	528.036	382.395	225.131	389.105	361.963	411.007	724.154	755.49	785.698	5278	2.68901	10.8582	10.0045	7.24507	4.26545	7.3722	6.85795	7.78717	13.7202	14.3139	14.8863
1968	sp|Q9BUZ4|TRAF4_HUMAN	TRAF4	TRAF4_HUMAN TNF receptor-associated factor 4	212	TIQSHQYQCPRLP	45.026	R	K.EFVFDTIQSHQY#QCPR.L	1	1	1	55.0163	80.7892	71.2618	60.7401	38.5512	65.1242	66.4643	66.0012	128.82	111.182	123.492	867.442	141.73	129.341	159.459	139.568	142.305	175.832	189.339	156.939	128.82	117.098	146.727	1627.16	8.71028	7.94892	9.79986	8.5774	8.74564	10.8061	11.6362	9.64498	7.91685	7.19645	9.01737
46	sp|O60716|CTND1_HUMAN	CTNND1	CTND1_HUMAN Catenin delta-1	241	TRIEERYRPSMEG	15.0073	R	R.Y#RPSMEGYR.A	1	3	3	54.8438	259.389	108.718	75.6493	28.3662	75.8844	52.4816	47.6298	354.004	351.349	253.578	1661.89	141.286	415.274	243.274	173.826	104.709	204.884	149.506	113.255	354.004	370.044	301.287	2571.35	5.49462	16.1501	9.46096	6.76011	4.07215	7.96794	5.8143	4.4045	13.7672	14.391	11.7171
805	sp|Q02487|DSC2_HUMAN	DSC2	DSC2_HUMAN Desmocollin-2	839	RLGEKVYLCNQDE	1000	U	K.VY#LCNQDENHK.H	1	2	1	54.6775	97.2453	71.4889	73.7593	37.9712	77.0953	74.1965	86.8014	323.587	316.742	215.948	1429.51	140.857	155.687	159.967	169.483	140.165	208.153	211.366	206.398	323.587	333.595	256.577	2305.84	6.10872	6.75188	6.9375	7.35018	6.07869	9.02722	9.16657	8.95111	14.0334	14.4674	11.1273
790	sp|Q8TAA9|VANG1_HUMAN	VANGL1	VANG1_HUMAN Vang-like protein 1	312	MAGLKVYNVDGPS	73.6163	R	K.VY#NVDGPSNNATGQSR.A	1	2	2	54.6679	76.4647	39.6909	118.747	26.2281	33.8893	33.1716	105.564	89.377	115.903	140.556	834.259	140.833	122.418	88.8146	272.856	96.8169	91.4992	94.497	251.011	89.377	122.07	167.001	1537.19	9.16167	7.96373	5.77771	17.7502	6.29829	5.95236	6.14737	16.3292	5.8143	7.94108	10.864
919	sp|P46940|IQGA1_HUMAN	IQGAP1	IQGA1_HUMAN Ras GTPase-activating-like protein IQGAP1	1526	YGEQVDYYKSYIK	30.8348	R	K.ATFYGEQVDY#YK.S	1	1	1	54.6632	60.0565	59.2296	104.077	47.0057	59.2531	62.323	124.625	134.254	121.21	169.842	996.538	140.82	96.1489	132.535	239.146	173.514	159.98	177.542	296.336	134.254	127.659	201.797	1879.73	7.49152	5.11503	7.05076	12.7223	9.23079	8.5108	9.44505	15.7648	7.14217	6.79134	10.7354
3732	sp|Q8IVF2|AHNK2_HUMAN	AHNAK2	AHNK2_HUMAN Protein AHNAK2	4795	DVTLTKYQVTVPR	37.5398	R	K.Y#QVTVPR.A	1	1	1	54.6048	128.751	80.6593	77.1052	29.3425	45.8238	53.8339	55.6273	232.278	236.577	181.968	1176.57	140.67	206.127	180.487	177.171	108.313	123.722	153.358	132.272	232.278	249.165	216.204	1919.77	7.32745	10.7371	9.40153	9.22879	5.64199	6.44462	7.98839	6.88999	12.0993	12.9789	11.262
1899	sp|O95490-6|LPHN2_HUMAN	LPHN2	LPHN2_HUMAN Isoform 6 of Latrophilin-2	1448	RGNSDGYIIPINK	24.2431	R	R.GNSDGY#IIPINK.E	1	1	1	54.3803	214.467	95.9588	105.51	39.5932	80.2987	56.5841	80.8465	358.852	354.733	275.749	1716.97	140.092	343.357	214.723	242.438	146.152	216.802	161.193	192.238	358.852	373.608	327.629	2717.08	5.15595	12.637	7.90269	8.92274	5.379	7.97922	5.93257	7.07517	13.2073	13.7503	12.0581
2070	sp|P09234|RU1C_HUMAN	SNRPC	RU1C_HUMAN U1 small nuclear ribonucleoprotein C	12	CDYCDTYLTHDSP	31.2747	U	K.FYCDYCDTY#LTHDSPSVR.K	1	1	1	54.3669	79.6635	52.3557	69.1787	32.2497	46.0698	47.7537	65.2418	105.792	98.3782	95.0227	746.072	140.057	127.539	117.154	158.958	119.045	124.386	136.038	155.133	105.792	103.613	112.901	1400.61	9.9997	9.10595	8.36446	11.3492	8.49945	8.88081	9.71271	11.0761	7.55323	7.39766	8.0608
796	sp|P42685|FRK_HUMAN	FRK	FRK_HUMAN Tyrosine-protein kinase FRK	99	SQQLQGYIPSNYV	97.5963	U	R.DGSSQQLQGY#IPSNYVAEDR.S	1	1	1	54.3078	88.2577	77.1368	115.14	57.2254	86.0978	70.7247	112.662	128.595	132.485	110.598	1033.23	139.905	141.298	172.605	264.567	211.238	232.459	201.476	267.89	128.595	139.534	131.406	2030.97	6.88856	6.95717	8.49865	13.0266	10.4008	11.4457	9.92016	13.1902	6.33171	6.8703	6.47009
3096	sp|O00571|DDX3X_HUMAN	DDX3X	DDX3X_HUMAN ATP-dependent RNA helicase DDX3X	301	VRPCVVYGGADIG	1000	R	R.VRPCVVY#GGADIGQQIR.D	1	1	1	53.8643	53.1095	52.3179	30.897	35.0414	43.36	34.7838	31.6479	79.9907	67.3999	108.935	591.348	138.762	85.0269	117.069	70.9948	129.35	117.07	99.0898	75.2531	79.9907	70.9862	129.431	1113.02	12.4672	7.63928	10.5181	6.37856	11.6215	10.5182	8.90277	6.76114	7.1868	6.37778	11.6288
1016	sp|P35222|CTNB1_HUMAN	CTNNB1	CTNB1_HUMAN Catenin beta-1	489	NAVRLHYGLPVVV	1000	R	R.LHY#GLPVVVK.L	1	1	1	53.6573	61.8313	53.6064	45.0621	40.2765	57.5072	50.6151	58.316	87.9784	63.8867	67.4521	640.189	138.229	98.9904	119.952	103.543	148.674	155.266	144.189	138.665	87.9784	67.2861	80.1428	1282.92	10.7746	7.71604	9.34998	8.07091	11.5888	12.1026	11.2391	10.8086	6.85769	5.24478	6.24692
1718	sp|Q13177|PAK2_HUMAN	PAK2	PAK2_HUMAN Serine/threonine-protein kinase PAK 2	453	NPLRALYLIATNG	36.5564	R	R.ALY#LIATNGTPELQNPEK.L	1	1	1	53.4683	79.3959	84.3409	140.413	68.4092	109.799	118.617	162.074	251.723	238.84	266.728	1573.81	137.742	127.111	188.726	322.639	252.521	296.451	337.907	385.383	251.723	251.548	316.911	2868.66	4.80161	4.43101	6.57887	11.247	8.80276	10.3341	11.7793	13.4342	8.77492	8.76883	11.0473
338	sp|P22626|ROA2_HUMAN	HNRNPA2B1	ROA2_HUMAN Heterogeneous nuclear ribonucleoproteins A2/B1	259	GGNFGGSPGYGGG	20.1669	R	R.GFGDGYNGYGGGPGGGNFGGS#PGYGGGR.G	0	1	1	53.4312	67.6173	59.1047	71.4946	28.0823	44.5045	52.611	31.8151	55.9801	52.9664	66.3118	583.919	137.647	108.254	132.256	164.279	103.661	120.16	149.875	75.6505	55.9801	55.7847	78.788	1182.33	11.6419	9.15592	11.186	13.8945	8.76751	10.1629	12.6762	6.3984	4.73471	4.71818	6.66377
1923	sp|Q08345-5|DDR1_HUMAN	DDR1	DDR1_HUMAN Isoform 4 of Epithelial discoidin domain-containing receptor 1	802	NLYAGDYYRVQGR	24.437	R	R.NLY#AGDY#YR.V	1	3	1	53.431	150.973	104.608	68.0925	35.9387	79.6621	62.6445	66.8451	127.851	108.41	86.3714	944.827	137.646	241.704	234.077	156.462	132.662	215.083	178.457	158.946	127.851	114.178	102.622	1799.69	7.64833	13.4303	13.0065	8.69384	7.37139	11.9511	9.91602	8.83184	7.10406	6.34431	5.70219
966	sp|Q96J84-2|KIRR1_HUMAN	KIRREL	KIRR1_HUMAN Isoform 2 of Kin of IRRE-like protein 1	621	KDPTNGYYNVRAH	24.437	R	K.DPTNGY#YNVR.A	1	1	1	53.2187	140.111	60.7389	39.7947	27.4827	45.3817	35.3381	39.2732	251.469	247.701	191.702	1132.21	137.099	224.314	135.913	91.4398	101.448	122.528	100.669	93.3846	251.469	260.881	227.77	1746.91	7.84807	12.8406	7.78015	5.23436	5.80727	7.01398	5.76266	5.34569	14.395	14.9338	13.0384
2675	sp|O00233|PSMD9_HUMAN	PSMD9	PSMD9_HUMAN 26S proteasome non-ATPase regulatory subunit 9	41	AQIKANYDVLESQ	84.3587	R	K.ANY#DVLESQK.G	1	1	1	53.1224	66.9435	75.3245	82.3787	38.3712	67.1031	83.8837	112.001	148.135	142.714	121.731	991.708	136.851	107.175	168.55	189.289	141.641	181.175	238.962	266.317	148.135	150.308	144.634	1873.04	7.30637	5.72198	8.99876	10.106	7.56211	9.67278	12.758	14.2185	7.90881	8.02483	7.72188
3743	sp|Q01105|SET_HUMAN	SET	SET_HUMAN Protein SET	7	MAPKRQSPLPPQK	1000	R	K.RQS#PLPPQK.K	0	1	1	52.8805	47.4281	42.6312	34.3299	33.9738	30.8395	24.8135	26.1555	57.1841	53.7172	43.1801	447.133	136.228	75.9312	95.3938	78.8829	125.409	83.2649	70.687	62.193	57.1841	56.5754	51.3042	893.053	15.2542	8.50242	10.6818	8.83294	14.0427	9.32362	7.91521	6.96408	6.40321	6.33506	5.74481
787	sp|P50402|EMD_HUMAN	EMD	EMD_HUMAN Emerin	94	KGYNDDYYEESYF	24.437	R	K.GYNDDY#YEESYFTTR.T	1	1	1	52.7777	71.2516	45.9132	51.9386	23.6307	26.9114	33.2679	50.9189	93.0916	110.895	137.218	697.815	135.963	114.072	102.738	119.344	87.229	72.6593	94.7713	121.076	93.0916	116.796	163.035	1220.78	11.1374	9.34422	8.41578	9.77608	7.14538	5.9519	7.76321	9.91796	7.62561	9.56736	13.3551
3313	sp|Q8WYP5-2|ELYS_HUMAN	AHCTF1	ELYS_HUMAN Isoform 2 of Protein ELYS	1257	SPSPGRSPQRLKE	36.5564	R	R.STPLASPSPSPGRS#PQR.L	0	1	1	52.681	58.1854	41.5803	45.3813	39.6182	51.6344	55.0968	45.246	65.557	53.4136	34.7233	543.117	135.714	93.1533	93.0422	104.277	146.244	139.41	156.956	107.587	65.557	56.2557	41.2563	1139.45	11.9104	8.17527	8.16552	9.15147	12.8346	12.2348	13.7747	9.44198	5.75338	4.93708	3.62072
693	sp|Q53RE8|ANR39_HUMAN	ANKRD39	ANR39_HUMAN Ankyrin repeat domain-containing protein 39	65	QPDSAGYTALHYA	17.0091	U	K.AEDPSQPDSAGY#TALHYASR.N	1	1	1	52.3865	50.8129	40.7509	70.2261	55.9643	45.996	48.1675	90.2568	92.2322	86.6805	120.058	753.532	134.955	81.3501	91.1863	161.365	206.583	124.187	137.216	214.614	92.2322	91.2927	142.646	1477.63	9.13324	5.50545	6.17113	10.9205	13.9807	8.40446	9.28626	14.5242	6.24191	6.17833	9.65373
447	sp|Q16625|OCLN_HUMAN	OCLN	OCLN_HUMAN Occludin	337	VNDKRFYPESSYK	87.265	R	K.RFY#PESSYK.S	1	1	1	52.2799	167.712	96.5893	106.472	30.7559	66.1414	66.402	104.618	260.887	272.417	243.307	1467.58	134.681	268.502	216.133	244.651	113.53	178.578	189.162	248.763	260.887	286.912	289.084	2430.88	5.5404	11.0454	8.89115	10.0643	4.67033	7.34622	7.7816	10.2335	10.7322	11.8028	11.8921
2005	sp|Q9UDY2-7|ZO2_HUMAN	TJP2	ZO2_HUMAN Isoform 7 of Tight junction protein ZO-2	1066	GASTKGYPPPVAA	149.816	R	K.GY#PPPVAAKPTFGR.S	1	1	1	52.2452	89.5201	89.9254	63.0973	27.0563	59.2856	63.0077	58.714	157.656	143.058	89.0389	892.605	134.591	143.319	201.222	144.984	99.8739	160.068	179.492	139.611	157.656	150.67	105.791	1617.28	8.32207	8.86176	12.442	8.9647	6.17543	9.89736	11.0984	8.63247	9.74821	9.31627	6.5413
3797	sp|Q15012|LAP4A_HUMAN	LAPTM4A	LAP4A_HUMAN Lysosomal-associated transmembrane protein 4A	230	KEPPPPYLPAxxx	1000	U	K.EPPPPY#LPA.-	1	1	1	51.801	60.0623	44.0504	56.9489	26.2933	34.1918	37.4104	43.9404	66.4206	62.8844	135.485	619.489	133.447	96.1581	98.5695	130.857	97.0574	92.316	106.572	104.482	66.4206	66.2304	160.976	1153.09	11.573	8.3392	8.54832	11.3484	8.41719	8.00599	9.24234	9.0611	5.76025	5.74375	13.9604
592	sp|P17181|INAR1_HUMAN	IFNAR1	INAR1_HUMAN Interferon alpha/beta receptor 1	527	DEDHKKYSSQTSQ	14.966	R	K.Y#SSQTSQDSGNYSNEDESESK.T	1	1	1	51.7717	50.5851	17.4064	19.1171	16.5416	14.5982	9.86996	4.65733	21.02	16.1166	22.2241	243.908	133.372	80.9854	38.9495	43.927	61.0607	39.4144	28.1169	11.0743	21.02	16.9741	26.4054	501.299	26.6052	16.1551	7.76972	8.76263	12.1805	7.86244	5.6088	2.20912	4.19311	3.38603	5.26739
2496	sp|P53778|MK12_HUMAN	MAPK12	MK12_HUMAN Mitogen-activated protein kinase 12	185	DSEMTGYVVTRWY	17.0091	R	R.QADSEM*TGY#VVTR.W	1	1	1	51.5196	34.895	24.5871	15.7361	31.8198	12.4121	7.79089	7.2747	33.8137	31.4669	35.3714	286.687	132.722	55.866	55.0174	36.1581	117.458	33.5121	22.1941	17.2979	33.8137	33.1412	42.0263	579.207	22.9144	9.64527	9.49875	6.2427	20.279	5.78586	3.83182	2.98649	5.83794	5.72184	7.25584
1719	sp|Q13177|PAK2_HUMAN	PAK2	PAK2_HUMAN Serine/threonine-protein kinase PAK 2	139	NTVKQKYLSFTPP	20.1669	U	K.Y#LSFTPPEK.D	1	1	1	51.5139	91.1943	76.7787	60.8993	44.6517	65.8417	69.0565	77.3714	152.883	145.265	105.096	940.552	132.707	146	171.804	139.934	164.824	177.769	196.724	183.975	152.883	152.995	124.869	1744.48	7.60726	8.36922	9.84841	8.02149	9.44832	10.1903	11.2769	10.5461	8.76382	8.77019	7.15793
362	sp|P21860|ERBB3_HUMAN	ERBB3	ERBB3_HUMAN Receptor tyrosine-protein kinase erbB-3	1307	QAPHVHYARLKTL	1000	R	R.AFQGPGHQAPHVHY#AR.L	1	1	1	51.1196	70.6834	74.5104	50.8863	44.4336	66.6612	62.8992	44.7214	86.0362	68.634	51.3146	671.9	131.691	113.162	166.728	116.926	164.02	179.982	179.183	106.34	86.0362	72.2859	60.9691	1377.32	9.5614	8.2161	12.1052	8.48936	11.9086	13.0675	13.0095	7.72074	6.24663	5.24829	4.42664
528	sp|P04083|ANXA1_HUMAN	ANXA1	ANXA1_HUMAN Annexin A1	207	SDARALYEAGERR	1000	U	R.ALY#EAGER.R	1	1	1	50.6199	43.0482	40.3428	38.9935	42.609	38.3056	34.0875	46.1745	52.7668	54.4897	52.9381	494.376	130.404	68.919	90.2733	89.5988	157.284	103.423	97.1061	109.795	52.7668	57.389	62.8981	1019.86	12.7865	6.75771	8.85156	8.78542	15.4222	10.1409	9.52154	10.7657	5.17394	5.62716	6.16734
806	sp|Q02487|DSC2_HUMAN	DSC2	DSC2_HUMAN Desmocollin-2	853	HKHAQDYVLTYNY	71.7529	U	K.HAQDY#VLTYNYEGR.G	1	2	2	50.5871	158.097	110.665	69.5875	78.5009	114.554	105.509	110.35	346.71	269.427	128.342	1542.33	130.32	253.11	247.631	159.897	289.774	309.291	300.568	262.392	346.71	283.763	152.489	2735.94	4.76324	9.25128	9.05102	5.84432	10.5914	11.3047	10.9859	9.59053	12.6724	10.3717	5.57355
1693	sp|P51610-4|HCFC1_HUMAN	HCFC1	HCFC1_HUMAN Isoform 4 of Host cell factor 1	666	TITLVKSPISVPG	16.062	R	K.S#PISVPGGSALISNLGK.V	0	1	1	49.6754	38.5203	41.3795	54.0608	35.7923	36.9076	46.6765	56.4595	133.004	147.781	177.022	817.278	127.971	61.67	92.5929	124.22	132.121	99.6486	132.969	134.25	133.004	155.644	210.328	1404.42	9.11203	4.39114	6.59297	8.84495	9.40755	7.09536	9.46789	9.55915	9.47038	11.0824	14.9761
2338	sp|Q5VTE0|EF1A3_HUMAN	EEF1A1P5	EF1A3_HUMAN Putative elongation factor 1-alpha-like 3	141	EHALLAYTLGVKQ	30.8348	R	R.EHALLAY#TLGVK.Q	1	1	1	49.4146	36.0145	34.3424	32.8079	35.8666	24.1772	26.8055	33.4667	34.8615	30.8804	19.2799	357.917	127.299	57.6583	76.8463	75.3856	132.396	65.2772	76.3616	79.5779	34.8615	32.5236	22.9073	781.094	16.2976	7.38174	9.83829	9.65127	16.95	8.35714	9.77623	10.188	4.46316	4.16384	2.93272
2581	sp|A1X283|SPD2B_HUMAN	SH3PXD2B	SPD2B_HUMAN SH3 and PX domain-containing protein 2B	230	EKYTVIYPYTARD	17.0091	R	K.YTVIY#PYTAR.D	1	1	1	49.371	54.4526	64.6303	63.4838	31.0469	46.749	58.0737	56.206	112.509	94.0375	195.795	826.354	127.187	87.1772	144.62	145.872	114.605	126.22	165.436	133.648	112.509	99.0411	232.632	1488.95	8.54208	5.85496	9.71291	9.797	7.69702	8.47711	11.111	8.97599	7.55626	6.65175	15.624
3712	sp|O14950|ML12B_HUMAN	MYL12B	ML12B_HUMAN Myosin regulatory light chain 12B	156	KKGNFNYIEFTRI	76.7327	R	K.GNFNY#IEFTR.I	1	1	1	49.1532	82.2693	50.5534	44.7442	32.1401	36.7218	46.6114	47.6455	156.444	159.796	182.219	888.298	126.626	131.711	113.121	102.813	118.64	99.1468	132.783	113.292	156.444	168.298	216.503	1479.38	8.5594	8.90314	7.64653	6.94972	8.01959	6.70192	8.97563	7.65811	10.575	11.3763	14.6347
1393	sp|Q5XXA6|ANO1_HUMAN	ANO1	ANO1_HUMAN Anoctamin-1	981	PAPSHAYHGGVLx	33.6572	R	K.ACPDSLGSPAPSHAY#HGGVL.-	1	1	1	48.0144	61.5919	38.8334	48.8252	25.1827	31.024	25.7855	43.8087	80.3204	66.9124	75.8571	546.156	123.692	98.607	86.8957	112.19	92.9578	83.7631	73.456	104.169	80.3204	70.4727	90.1291	1016.65	12.1666	9.69918	8.54724	11.0352	9.14351	8.2391	7.22528	10.2463	7.90047	6.93184	8.86528
3088	sp|Q5SRE5|NU188_HUMAN	NUP188	NU188_HUMAN Nucleoporin NUP188 homolog	1523	RVQRPPSAASAAP	23.6238	R	R.VQRPPS#AASAAPSSSK.Q	0	1	1	47.8632	69.6195	59.4257	60.5062	53.8741	66.0536	66.6533	63.7755	98.6748	85.098	78.3896	749.934	123.303	111.459	132.974	139.03	198.868	178.341	189.877	151.647	98.6748	89.6259	93.1382	1506.94	8.18234	7.39639	8.82412	9.22602	13.1968	11.8347	12.6002	10.0632	6.54803	5.94755	6.18062
3334	sp|Q86X27|RGPS2_HUMAN	RALGPS2	RGPS2_HUMAN Ras-specific guanine nucleotide-releasing factor RalGPS2	278	FVEDDNYKLSLKI	1000	R	K.FVEDDNY#K.L	1	2	1	47.6618	69.0397	64.3095	55.9156	30.8949	59.7279	56.9692	64.7785	123.033	104.722	99.8837	776.936	122.784	110.531	143.902	128.482	114.044	161.262	162.29	154.032	123.033	110.294	118.676	1449.33	8.47175	7.62634	9.92888	8.86493	7.86872	11.1267	11.1976	10.6278	8.48896	7.61003	8.18835
1012	sp|Q09666|AHNK_HUMAN	AHNAK	AHNK_HUMAN Neuroblast differentiation-associated protein AHNAK	121	SGDDEEYQRIYTT	46.0157	R	R.EVFSSCSSEVVLSGDDEEY#QR.I	1	4	3	47.3835	96.1979	65.003	66.2152	34.3073	60.0449	48.9637	55.1267	148.633	127.529	119.99	869.394	122.067	154.01	145.454	152.148	126.64	162.118	139.484	131.081	148.633	134.315	142.565	1558.52	7.83225	9.88185	9.33286	9.76239	8.12567	10.4021	8.94982	8.41064	9.53685	8.6181	9.14751
484	sp|Q9H4G0|E41L1_HUMAN	EPB41L1	E41L1_HUMAN Band 4.1-like protein 1	864	VTKAVVYRETDPS	33.6572	R	K.AVVY#RETDPSPEER.D	1	2	1	47.0174	217.084	90.1871	53.0668	25.0542	65.1886	49.0479	49.4773	253.053	289.494	229.491	1368.16	121.124	347.546	201.807	121.936	92.4834	176.006	139.724	117.648	253.053	304.898	272.669	2148.89	5.63656	16.1732	9.39122	5.67437	4.30377	8.19052	6.50215	5.47482	11.776	14.1886	12.6888
2758	sp|Q08174-2|PCDH1_HUMAN	PCDH1	PCDH1_HUMAN Isoform 2 of Protocadherin-1	1192	RLLPSYSAFSHSS	17.0091	U	R.LLPSYS#AFSHSSHDSCK.D	0	1	1	46.9653	51.6341	46.8781	48.7434	29.9093	38.5089	33.0183	42.7046	100.475	90.1253	98.6997	627.662	120.989	82.6648	104.897	112.002	110.405	103.972	94.0604	101.544	100.475	94.9207	117.269	1143.2	10.5834	7.231	9.17573	9.79724	9.65756	9.09481	8.22781	8.88242	8.78896	8.30307	10.258
2415	sp|O43610|SPY3_HUMAN	SPRY3	SPY3_HUMAN Protein sprouty homolog 3	27	THASNDYVERPPA	57.7111	U	R.STHASNDY#VERPPAPCK.Q	1	2	2	46.9347	396.788	184.146	203.411	42.9892	166.622	137.267	159.193	280.554	422.258	203.141	2243.3	120.911	635.246	412.055	467.394	158.688	449.869	391.036	378.533	280.554	444.726	241.361	3980.37	3.03767	15.9595	10.3522	11.7425	3.98676	11.3022	9.82411	9.50998	7.04843	11.173	6.06378
965	sp|Q96J84-2|KIRR1_HUMAN	KIRREL	KIRR1_HUMAN Isoform 2 of Kin of IRRE-like protein 1	663	LSHSSGYAQLNTY	31.2747	R	R.LSHSSGY#AQLNTYSR.G	1	1	1	46.9204	80.9813	62.7555	55.9306	40.3181	48.6206	43.762	46.1288	125.671	129.254	153.626	833.968	120.874	129.649	140.425	128.517	148.828	131.273	124.666	109.686	125.671	136.132	182.529	1478.25	8.17683	8.77044	9.49942	8.69383	10.0678	8.88029	8.43337	7.42	8.50132	9.20898	12.3477
1547	sp|P27986-4|P85A_HUMAN	PIK3R1	P85A_HUMAN Isoform 4 of Phosphatidylinositol 3-kinase regulatory subunit alpha	470	DRLYEEYTRTSQE	24.437	R	R.LYEEY#TR.T	1	1	1	46.7186	61.7988	55.6027	92.5432	45.188	76.5362	78.2739	108.065	134.847	118.381	109.352	927.306	120.354	98.9382	124.419	212.645	166.804	206.644	222.981	256.959	134.847	124.68	129.926	1799.2	6.68932	5.49902	6.91528	11.8189	9.27103	11.4853	12.3934	14.2819	7.49485	6.92973	7.22136
486	sp|Q9H4G0|E41L1_HUMAN	EPB41L1	E41L1_HUMAN Band 4.1-like protein 1	796	DVLTSTYGATAET	19.8431	R	K.DVLTSTY#GATAETLSTSTTTHVTK.T	1	1	1	46.6107	58.2458	12.8019	27.653	26.3296	11.7866	11.306	14.2638	64.7141	105.261	200.009	578.981	120.076	93.25	28.6463	63.5408	97.1917	31.8232	32.2077	33.9168	64.7141	110.862	237.639	913.867	13.1393	10.2039	3.13462	6.95296	10.6352	3.48226	3.52433	3.71135	7.08134	12.1311	26.0037
2768	sp|P62140|PP1B_HUMAN	PPP1CB	PP1B_HUMAN Serine/threonine-protein phosphatase PP1-beta catalytic subunit	306	KKAKYQYGGLNSG	20.1669	U	K.YQY#GGLNSGRPVTPPR.T	1	1	1	46.3605	98.0982	59.32	62.3765	28.81	41.9513	36.3941	48.5027	163.314	168.24	137.192	890.56	119.432	157.053	132.738	143.328	106.347	113.266	103.677	115.331	163.314	177.192	163.004	1494.68	7.99043	10.5074	8.88066	9.58919	7.11505	7.57795	6.9364	7.71607	10.9264	11.8548	10.9056
1140	sp|P40763-2|STAT3_HUMAN	STAT3	STAT3_HUMAN Isoform Del-701 of Signal transducer and activator of transcription 3	704	DPGAAPYLKTKFI	138.763	U	K.YCRPESQEHPEADPGAAPY#LK.T	1	2	2	46.2711	498.336	309.604	168.651	64.5132	357.821	364.505	409.035	329.403	307.06	143.848	2999.05	119.201	797.823	692.786	387.525	238.14	966.096	1038.38	972.612	329.403	323.399	170.912	6036.27	1.97475	13.2171	11.477	6.41993	3.94515	16.0048	17.2023	16.1128	5.45706	5.35759	2.83141
1625	sp|O60784-2|TOM1_HUMAN	TOM1	TOM1_HUMAN Isoform 2 of Target of Myb protein 1	386	QRKEVKYEAPQAT	146.622	R	K.Y#EAPQATDGLAGALDAR.Q	1	4	3	45.6927	259.548	182.406	140.774	30.1176	114.113	96.8928	132.858	420.299	597.853	345.718	2366.27	117.711	415.529	408.16	323.47	111.174	308.098	276.022	315.912	420.299	629.664	410.763	3736.8	3.15005	11.1199	10.9227	8.65632	2.97512	8.24498	7.38658	8.45407	11.2476	16.8503	10.9924
718	sp|Q86X29|LSR_HUMAN	LSR	LSR_HUMAN Lipolysis-stimulated lipoprotein receptor	332	STYAHLSPAKTPP	38.3708	R	K.AATSGVPSIYAPSTYAHLS#PAK.T	0	1	1	45.4866	99.6165	75.2582	102.441	46.9013	59.7839	67.7972	77.1615	136.669	145.811	152.592	1009.52	117.18	159.483	168.402	235.388	173.128	161.413	193.136	183.476	136.669	153.57	181.302	1863.15	6.28937	8.55989	9.03855	12.6339	9.29225	8.66347	10.3661	9.84765	7.33539	8.24249	9.73093
936	sp|P08754|GNAI3_HUMAN	GNAI3	GNAI3_HUMAN Guanine nucleotide-binding protein G(k) subunit alpha	61	IIHEDGYSEDECK	30.8348	U	K.IIHEDGY#SEDECK.Q	1	1	1	45.3571	79.8742	91.1688	109.635	36.3158	103.919	129.372	206.44	210.351	210.982	136.425	1359.84	116.846	127.876	204.004	251.918	134.054	280.576	368.547	490.877	210.351	222.208	162.093	2569.35	4.5477	4.97699	7.9399	9.80475	5.21743	10.9201	14.344	19.1051	8.18692	8.64839	6.30871
1367	sp|Q9C0B5|ZDHC5_HUMAN	ZDHHC5	ZDHC5_HUMAN Palmitoyltransferase ZDHHC5	711	GVGGTTYEISVxx	24.437	R	K.VSGVGGTTY#EISV.-	1	1	1	45.2312	89.9774	48.7959	38.4	25.2634	40.2643	28.6041	39.4245	144.609	128.626	126.155	755.351	116.522	144.051	109.188	88.2351	93.256	108.711	81.4854	93.7444	144.609	135.47	149.891	1265.16	9.21005	11.386	8.63037	6.9742	7.37106	8.59268	6.4407	7.40966	11.4301	10.7077	11.8475
2057	sp|Q9H1Z4|WDR13_HUMAN	WDR13	WDR13_HUMAN WD repeat-containing protein 13	128	QMNRAVYEDRPPG	55.37	U	R.AVY#EDRPPGSVVPTSAAEASR.A	1	1	1	45.1416	40.7241	26.0082	51.5418	16.8359	20.9727	20.5819	31.2047	119.077	156.569	257.786	786.443	116.291	65.1982	58.1974	118.432	62.1469	56.6252	58.6324	74.1993	119.077	164.9	306.287	1199.99	9.69106	5.43324	4.84983	9.86945	5.17897	4.71882	4.88608	6.18334	9.92317	13.7418	25.5242
1019	sp|O95208-2|EPN2_HUMAN	EPN2	EPN2_HUMAN Isoform 2 of Epsin-2	17	KNIVNNYSEAEIK	30.8348	R	K.NIVNNY#SEAEIK.V	1	1	1	45.1115	84.7251	96.8568	202.597	50.113	83.4753	118.004	253.521	256.034	284.581	197.209	1672.23	116.214	135.643	216.732	465.526	184.984	225.379	336.161	602.827	256.034	299.723	234.313	3073.53	3.78111	4.41325	7.05155	15.1463	6.01861	7.33288	10.9373	19.6135	8.33027	9.75175	7.62356
2104	sp|Q7KZF4|SND1_HUMAN	SND1	SND1_HUMAN Staphylococcal nuclease domain-containing protein 1	109	TPQGREYGMIYLG	36.5564	U	R.EY#GMIYLGK.D	1	1	1	45.0701	43.5893	36.0594	36.7929	34.6141	33.3331	32.2621	38.1102	54.5459	41.0314	58.7583	454.167	116.107	69.7853	80.6884	84.5423	127.773	89.9975	91.906	90.6192	54.5459	43.2146	69.8134	918.992	12.6342	7.59368	8.78009	9.19946	13.9035	9.79307	10.0007	9.86071	5.93541	4.70239	7.59673
1493	sp|P37802|TAGL2_HUMAN	TAGLN2	TAGL2_HUMAN Transgelin-2	8	ANRGPAYGLSREV	73.3109	U	R.GPAY#GLSR.E	1	1	1	44.9956	272.938	119.151	156.882	29.2541	69.1668	55.5306	84.6222	441.712	438.617	460.786	2173.66	115.915	436.966	266.619	360.48	107.987	186.746	158.192	201.216	441.712	461.956	547.48	3285.27	3.52833	13.3008	8.11559	10.9726	3.287	5.68436	4.81519	6.12481	13.4452	14.0614	16.6647
941	sp|P04075-2|ALDOA_HUMAN	ALDOA	ALDOA_HUMAN Isoform 2 of Fructose-bisphosphate aldolase A	414	SESLFVSNHAYxx	71.0667	R	K.YTPSGQAGAAASESLFVS#NHAY.-	0	2	2	44.9241	67.9057	58.2685	55.5269	24.7158	42.6065	46.4406	45.3939	114.904	122.563	87.5955	710.845	115.731	108.715	130.385	127.589	91.2346	115.035	132.297	107.939	114.904	129.085	104.076	1276.99	9.0628	8.51339	10.2103	9.99139	7.1445	9.0083	10.3601	8.45257	8.99805	10.1085	8.15011
2617	sp|Q14257|RCN2_HUMAN	RCN2	RCN2_HUMAN Reticulocalbin-2	311	RQLHDDYFYHDEL	30.8348	R	R.QLHDDY#FYHDEL.-	1	1	1	44.8221	57.2774	29.507	20.8598	14.8747	18.2512	19.558	19.6377	98.8253	119.09	93.2126	535.915	115.468	91.6996	66.0264	47.9313	54.9076	49.2772	55.7155	46.6948	98.8253	125.426	110.75	862.722	13.3842	10.6291	7.65326	5.55582	6.36446	5.71183	6.4581	5.4125	11.4551	14.5384	12.8373
2017	sp|Q8NFH5|NUP53_HUMAN	NUP35	NUP53_HUMAN Nucleoporin NUP53	300	KASTSDYQVISDR	48.8739	R	K.ASTSDY#QVISDR.Q	1	1	1	44.7016	81.8464	54.3768	44.2224	27.1909	47.2388	44.9457	45.3332	145.612	169.295	197.794	902.557	115.158	131.034	121.676	101.614	100.371	127.542	128.038	107.794	145.612	178.303	235.008	1492.15	7.71758	8.78156	8.15443	6.80989	6.7266	8.54753	8.58079	7.22409	9.75851	11.9494	15.7496
2941	sp|O43390-2|HNRPR_HUMAN	HNRNPR	HNRPR_HUMAN Isoform 2 of Heterogeneous nuclear ribonucleoprotein R	437	STAYEDYYYHPPP	48.8739	R	R.STAYEDY#YYHPPPR.M	1	1	1	44.6694	91.262	66.4972	64.7683	38.4825	58.3965	53.0509	61.5606	121.155	112.181	83.0936	795.118	115.075	146.108	148.798	148.824	142.052	157.667	151.128	146.38	121.155	118.15	98.7272	1494.06	7.70214	9.77924	9.95925	9.96101	9.50775	10.5529	10.1152	9.79744	8.10911	7.90797	6.60796
2200	sp|P46013|KI67_HUMAN	MKI67	KI67_HUMAN Antigen KI-67	357	YSQQQNSPQKHKN	71.9493	U	K.TPVQYSQQQNS#PQK.H	0	1	1	44.612	73.1437	63.9327	47.7985	36.626	51.1677	53.1284	47.3805	71.7838	74.0155	131.297	694.885	114.927	117.101	143.059	109.831	135.199	138.15	151.349	112.662	71.7838	77.9538	155.999	1328.01	8.65404	8.81776	10.7724	8.2703	10.1805	10.4027	11.3966	8.48351	5.40535	5.86995	11.7468
530	sp|P04083|ANXA1_HUMAN	ANXA1	ANXA1_HUMAN Annexin A1	39	GSAVSPYPTFNPS	22.0108	R	K.GGPGSAVSPY#PTFNPSSDVAALHK.A	1	2	1	44.4642	264.066	171.52	236.761	42.7385	137.316	76.2461	162.503	165.316	190.743	207.71	1699.38	114.546	422.763	383.803	544.027	157.762	370.745	217.205	386.402	165.316	200.892	246.789	3210.25	3.56814	13.1692	11.9556	16.9466	4.91433	11.5488	6.76597	12.0365	5.14963	6.25783	7.68754
630	sp|Q99569|PKP4_HUMAN	PKP4	PKP4_HUMAN Plakophilin-4	372	QQQYDIYERMVPP	47.8083	R	R.TVHDM*EQFGQQQYDIY#ER.M	1	2	1	44.4241	71.2448	82.3959	47.0859	27.385	46.3146	46.4351	48.8921	129.873	102.531	72.3812	718.963	114.443	114.061	184.374	108.193	101.087	125.047	132.281	116.257	129.873	107.986	85.9994	1319.6	8.67255	8.6436	13.9719	8.19894	7.66044	9.47611	10.0243	8.80997	9.84184	8.18325	6.51707
2721	sp|Q6ZSS7|MFSD6_HUMAN	MFSD6	MFSD6_HUMAN Major facilitator superfamily domain-containing protein 6	20	EEQKRKYVLADPF	177.905	R	K.Y#VLADPFNGISR.E	1	2	2	44.393	118.414	100.952	141.041	27.7325	72.9397	61.2438	124.789	328.996	369.314	299.032	1688.85	114.363	189.577	225.894	324.083	102.37	196.933	174.467	296.725	328.996	388.965	355.293	2697.67	4.23932	7.02744	8.3737	12.0135	3.79476	7.30013	6.46734	10.9993	12.1956	14.4186	13.1704
2859	sp|Q96S55|WRIP1_HUMAN	WRNIP1	WRIP1_HUMAN ATPase WRNIP1	500	RAGEEHYNCISAL	84.6094	R	R.AGEEHY#NCISALHK.S	1	2	1	44.2941	48.1466	57.965	40.2875	46.0652	50.6753	42.3503	45.4383	62.0573	53.6334	131.745	622.657	114.108	77.0815	129.705	92.5721	170.042	136.821	120.645	108.044	62.0573	56.4872	156.532	1224.09	9.32183	6.29702	10.596	7.5625	13.8913	11.1773	9.85584	8.82644	5.06965	4.61461	12.7875
1878	sp|Q7Z699|SPRE1_HUMAN	SPRED1	SPRE1_HUMAN Sprouty-related, EVH1 domain-containing protein 1	294	KKSDYLYSCGDET	17.0091	U	K.KSDYLY#SCGDETK.L	1	1	1	44.2184	107.763	50.995	42.8836	34.3681	49.917	51.7061	48.1794	104.14	101.307	76.7675	712.246	113.913	172.526	114.109	98.5373	126.864	134.773	147.297	114.562	104.14	106.698	91.2109	1324.63	8.5996	13.0245	8.6144	7.43885	9.57734	10.1744	11.1198	8.64859	7.86183	8.05491	6.88576
3168	sp|P0CG48|UBC_HUMAN	UBC	UBC_HUMAN Polyubiquitin-C	59	GRTLSDYNIQKES	48.8739	R	R.TLSDY#NIQK.E	1	1	1	44.1724	80.0611	101.852	131.226	42.4135	71.8861	105.089	186.24	222.488	246.416	195.253	1427.1	113.795	128.176	227.91	301.53	156.563	194.088	299.369	442.845	222.488	259.527	231.988	2578.28	4.41359	4.97137	8.83961	11.695	6.07238	7.52783	11.6112	17.176	8.62931	10.0659	8.9978
1720	sp|Q13177|PAK2_HUMAN	PAK2	PAK2_HUMAN Serine/threonine-protein kinase PAK 2	130	LDVLKFYDSNTVK	17.0091	U	K.FY#DSNTVK.Q	1	1	1	43.868	74.7671	64.0307	46.8249	32.2455	56.5054	51.8769	57.4824	123.551	107.898	90.1717	749.223	113.01	119.7	143.278	107.594	119.029	152.562	147.783	136.683	123.551	113.64	107.137	1383.97	8.16569	8.64906	10.3527	7.77429	8.60058	11.0235	10.6782	9.87615	8.92734	8.21114	7.74129
2001	sp|Q7Z2Y5|NRK_HUMAN	NRK	NRK_HUMAN Nik-related protein kinase	984	DDVNNNYYEAPSC	48.8739	R	K.FVDDVNNNY#YEAPSCPR.A	1	2	2	43.6035	93.7482	69.5303	50.4633	28.848	53.0214	48.6966	61.921	145.17	141.524	144.241	880.768	112.329	150.088	155.585	115.954	106.488	143.155	138.724	147.237	145.17	149.055	171.38	1535.16	7.31708	9.7767	10.1347	7.5532	6.93659	9.32506	9.03641	9.59097	9.4563	9.70937	11.1636
3256	sp|O43865|SAHH2_HUMAN	AHCYL1	SAHH2_HUMAN Putative adenosylhomocysteinase 2	28	IEDAEKYSFMATV	24.437	U	K.Y#SFM*ATVTK.A	1	2	1	43.5999	160.125	67.1436	73.2796	18.9794	53.5186	42.423	58.2705	265.835	239.844	256.899	1279.92	112.32	256.356	150.244	168.381	70.0595	144.497	120.852	138.557	265.835	252.606	305.234	1984.94	5.65859	12.9151	7.56919	8.48292	3.52955	7.27967	6.08843	6.9804	13.3926	12.7261	15.3775
2491	sp|Q96JP5|ZFP91_HUMAN	ZFP91	ZFP91_HUMAN E3 ubiquitin-protein ligase ZFP91	85	RRRSSPSARPPDV	13.3795	R	R.SSPS#ARPPDVPGQQPQAAK.S	0	1	1	43.5015	44.5304	38.8691	33.5118	38.0367	46.9455	39.1592	36.0345	47.4353	40.9472	37.1511	446.122	112.066	71.2919	86.9756	77.003	140.406	126.75	111.554	85.6835	47.4353	43.1259	44.1409	946.433	11.8409	7.5327	9.18983	8.13613	14.8353	13.3924	11.7868	9.05331	5.01201	4.55668	4.66392
1789	sp|Q5T5P2|SKT_HUMAN	KIAA1217	SKT_HUMAN Sickle tail protein homolog	393	YRNEGFYADPYLY	132.105	R	R.NEGFY#ADPYLYHEGR.M	1	1	1	43.4898	51.0269	42.0494	25.4789	23.2665	34.6233	24.7879	25.5304	85.589	67.1977	69.5552	492.595	112.036	81.6927	94.0918	58.545	85.8844	93.481	70.614	60.7068	85.589	70.7732	82.6416	896.055	12.5032	9.11693	10.5007	6.53364	9.58472	10.4325	7.88054	6.77489	9.55175	7.89831	9.22282
2615	sp|Q9H9G7|AGO3_HUMAN	AGO3	AGO3_HUMAN Protein argonaute-3	189	FSAPEGYDHPLGG	71.9493	R	R.SFFSAPEGY#DHPLGGGR.E	1	1	1	43.365	58.2349	46.6348	48.5893	31.328	39.6306	50.4006	60.099	101.984	89.5621	88.9599	658.788	111.715	93.2325	104.353	111.648	115.642	107.001	143.578	142.905	101.984	94.3276	105.697	1232.08	9.06714	7.56708	8.46961	9.06173	9.38592	8.68454	11.6533	11.5986	8.27738	7.65596	8.57875
2618	sp|Q14257|RCN2_HUMAN	RCN2	RCN2_HUMAN Reticulocalbin-2	313	LHDDYFYHDELxx	20.1669	R	R.QLHDDYFY#HDEL.-	1	1	1	43.1075	50.9477	44.1209	36.1379	30.5608	32.8098	32.9158	29.0221	66.8158	62.0951	65.4068	493.94	111.051	81.566	98.7273	83.0372	112.81	88.5847	93.7684	69.0093	66.8158	65.3991	77.7127	948.482	11.7083	8.59963	10.409	8.75475	11.8938	9.33963	9.88615	7.27576	7.0445	6.89513	8.19338
1165	sp|Q15464|SHB_HUMAN	SHB	SHB_HUMAN SH2 domain-containing adapter protein B	10	WLNKYFSLGNSKT	20.1669	R	K.YFS#LGNSK.T	0	1	1	42.8871	103.409	51.4973	60.6246	26.135	48.2231	34.4854	45.4314	90.1209	116.286	116.022	735.122	110.484	165.555	115.233	139.302	96.4732	130.2	98.2396	108.028	90.1209	122.474	137.851	1313.96	8.40845	12.5997	8.76992	10.6017	7.34218	9.90896	7.47661	8.22154	6.85873	9.32096	10.4912
1159	sp|Q15464|SHB_HUMAN	SHB	SHB_HUMAN SH2 domain-containing adapter protein B	272	AGYMEPYEAQRIM	150.768	R	K.GESAGYM*EPY#EAQR.I	1	3	3	42.6367	89.3938	65.923	63.7429	25.506	50.3142	42.925	46.4242	157.571	161.206	189.681	935.323	109.838	143.117	147.513	146.468	94.1511	135.845	122.282	110.389	157.571	169.783	225.369	1562.33	7.03044	9.16052	9.44188	9.37497	6.02635	8.69508	7.82691	7.06565	10.0856	10.8674	14.4252
1467	sp|Q8NAF0|ZN579_HUMAN	ZNF579	ZN579_HUMAN Zinc finger protein 579	483	QAQAPTSPPPPPP	17.0091	U	R.AAALQALQAQAPTS#PPPPPPPLK.A	0	1	1	42.5262	55.7885	43.7811	44.622	38.7189	53.8147	44.9999	44.4951	63.5485	57.5204	63.0819	552.897	109.554	89.3159	97.9669	102.532	142.925	145.297	128.193	105.801	63.5485	60.581	74.9504	1120.66	9.77579	7.96991	8.74187	9.14922	12.7536	12.9652	11.439	9.44095	5.67061	5.40582	6.68804
3351	sp|P18031|PTN1_HUMAN	PTPN1	PTN1_HUMAN Tyrosine-protein phosphatase non-receptor type 1	46	NKNRNRYRDVSPF	27.1205	U	R.Y#RDVSPFDHSR.I	1	1	1	42.0677	88.5611	68.4847	121.68	26.4965	69.4675	71.1037	151.206	174.422	162.469	152.569	1128.53	108.372	141.784	153.245	279.595	97.8075	187.558	202.555	359.541	174.422	171.113	181.274	2057.27	5.26778	6.89186	7.44896	13.5906	4.75424	9.11686	9.84584	17.4766	8.47833	8.31751	8.81138
2976	sp|Q53EZ4|CEP55_HUMAN	CEP55	CEP55_HUMAN Centrosomal protein of 55 kDa	284	NLNQLLYSQRRAD	30.8348	R	K.EVHNLNQLLY#SQR.R	1	1	1	41.6101	44.877	61.3095	58.7982	33.7134	41.3056	47.4845	44.4628	90.2445	87.5803	63.7582	615.144	107.194	71.8469	137.189	135.106	124.447	111.523	135.271	105.725	90.2445	92.2404	75.7539	1186.54	9.03414	6.05516	11.5621	11.3865	10.4883	9.39899	11.4004	8.91032	7.60569	7.77389	6.38444
636	sp|Q99569|PKP4_HUMAN	PKP4	PKP4_HUMAN Plakophilin-4	415	LHITPIYEGRTYY	15.0073	R	R.SAVSPDLHITPIY#EGR.T	1	1	1	41.3827	45.1567	25.8958	31.4413	21.3111	20.8944	16.9062	18.3281	68.232	69.9772	84.0397	443.565	106.608	72.2948	57.9458	72.2453	78.6663	56.4138	48.1613	43.5809	68.232	73.7006	99.8513	777.7	13.7081	9.29597	7.45092	9.28961	10.1153	7.25392	6.19278	5.60382	8.77356	9.47674	12.8393
2473	sp|Q8WWI1|LMO7_HUMAN	LMO7	LMO7_HUMAN LIM domain only protein 7	185	KAQSNPYYNGPHL	17.0091	R	K.AQSNPY#YNGPHLNLK.A	1	1	1	41.3397	64.5322	67.4485	70.9672	25.7605	47.7705	71.389	92.3004	141.941	161.285	207.59	992.324	106.497	103.314	150.926	163.067	95.0908	128.978	203.368	219.474	141.941	169.867	246.647	1729.17	6.15885	5.9748	8.72824	9.43038	5.49922	7.45893	11.761	12.6924	8.20861	9.8236	14.2639
3664	sp|Q9P035|HACD3_HUMAN	PTPLAD1	HACD3_HUMAN Very-long-chain (3R)-3-hydroxyacyl-[acyl-carrier protein] dehydratase 3	316	FSFTLPYPVKIKV	37.5398	R	R.FSFTLPY#PVK.I	1	1	1	41.1427	45.9979	40.0571	45.994	40.843	50.6888	45.3551	58.6621	59.9541	57.3872	45.9273	532.009	105.99	73.6414	89.6339	105.684	150.765	136.857	129.204	139.488	59.9541	60.4407	54.5683	1106.23	9.58118	6.65698	8.10266	9.55359	13.6288	12.3715	11.6797	12.6093	5.41969	5.46368	4.93283
2827	sp|Q86T03-2|TM55B_HUMAN	TMEM55B	TM55B_HUMAN Isoform 2 of Type 1 phosphatidylinositol 4,5-bisphosphate 4-phosphatase	169	VHPGPLSPEPQPM	1000	R	R.IINLGPVHPGPLS#PEPQPM*GVR.V	0	2	2	41.0555	72.3944	87.6221	85.9554	32.1277	49.4696	49.402	53.975	109.831	106.991	88.8908	777.715	105.765	115.902	196.068	197.507	118.594	133.565	140.733	128.343	109.831	112.684	105.615	1464.61	7.22138	7.91349	13.3871	13.4853	8.09735	9.11953	9.60893	8.76295	7.49901	7.69382	7.21115
502	sp|Q96AE4-2|FUBP1_HUMAN	FUBP1	FUBP1_HUMAN Isoform 2 of Far upstream element-binding protein 1	60	NSNDYGYGGQKRP	97.7479	R	K.IGGDAGTSLNSNDYGY#GGQK.R	1	1	1	40.7182	305.958	176.439	200.056	42.664	126.296	99.3952	141.408	191.757	288.676	295.709	1909.08	104.896	489.831	394.809	459.685	157.487	340.993	283.15	336.243	191.757	304.036	351.345	3414.23	3.07232	14.3467	11.5636	13.4638	4.61267	9.98738	8.29324	9.84828	5.61641	8.90495	10.2906
1647	sp|Q92692|PVRL2_HUMAN	PVRL2	PVRL2_HUMAN Poliovirus receptor-related protein 2	454	EQEMPRYHELPTL	111.687	U	R.Y#HELPTLEER.S	1	1	1	40.6922	209.231	92.1579	60.9315	25.7098	74.7231	57.153	61.1209	351.374	298.62	158.642	1430.36	104.829	334.973	206.217	140.008	94.9035	201.748	162.814	145.335	351.374	314.51	188.489	2245.2	4.66903	14.9195	9.18481	6.23586	4.22695	8.98576	7.25163	6.47312	15.65	14.0081	8.3952
3597	sp|P11940|PABP1_HUMAN	PABPC1	PABP1_HUMAN Polyadenylate-binding protein 1	291	QDRITRYQGVNLY	87.265	R	R.Y#QGVNLYVK.N	1	1	1	40.6191	61.638	65.6334	83.205	28.5753	51.9766	64.6334	84.3948	154.722	150.028	149.905	935.331	104.641	98.6808	146.865	191.187	105.481	140.334	184.123	200.676	154.722	158.01	178.109	1662.83	6.29293	5.93451	8.83222	11.4977	6.34347	8.43946	11.0729	12.0683	9.30476	9.5025	10.7112
2175	sp|P52757|CHIO_HUMAN	CHN2	CHIO_HUMAN Beta-chimaerin	158	IYEHIGYATLLRE	44.2778	R	K.MTTNPIYEHIGY#ATLLR.E	1	2	2	40.593	114.588	82.9889	47.9425	31.5524	88.1175	69.9136	66.6795	227.817	220.671	156.668	1147.53	104.573	183.452	185.7	110.162	116.471	237.912	199.165	158.552	227.817	232.413	186.145	1942.36	5.38383	9.44478	9.56054	5.67154	5.99634	12.2486	10.2538	8.16284	11.7288	11.9655	9.58342
3320	sp|Q9H5N1|RABE2_HUMAN	RABEP2	RABE2_HUMAN Rab GTPase-binding effector protein 2	133	QLLSRAYPLDSLE	58.5514	R	R.AY#PLDSLEK.Q	1	2	2	40.2532	56.3457	89.4938	116.385	35.7545	60.2038	80.3373	154.629	308.439	380.976	308.492	1631.31	103.698	90.208	200.256	267.428	131.982	162.547	228.86	367.681	308.439	401.247	366.533	2628.88	3.94458	3.43143	7.61754	10.1727	5.02046	6.18312	8.70559	13.9862	11.7327	15.263	13.9426
770	sp|Q14739|LBR_HUMAN	LBR	LBR_HUMAN Lamin-B receptor	166	SYIATQYSLRPRR	30.8348	R	K.FSLSQESSYIATQY#SLRPR.R	1	1	1	40.2066	63.1259	40.3313	33.8887	26.3187	42.4024	35.8931	36.8621	98.8883	94.9655	84.1758	597.059	103.578	101.063	90.2474	77.869	97.1514	114.484	102.25	87.6515	98.8883	100.018	100.013	1073.21	9.65121	9.41685	8.40908	7.25568	9.05238	10.6674	9.52744	8.1672	9.21422	9.31953	9.31902
1141	sp|Q9Y5K6|CD2AP_HUMAN	CD2AP	CD2AP_HUMAN CD2-associated protein	361	IAAEKKYFSLKPE	48.8739	U	K.Y#FSLKPEEK.D	1	1	1	40.1983	121.113	94.6048	89.0463	36.6271	76.4574	65.7832	69.1852	192.846	184.777	157.474	1128.11	103.557	193.899	211.693	204.609	135.203	206.431	187.399	164.51	192.846	194.609	187.102	1981.86	5.22523	9.78368	10.6815	10.3241	6.82204	10.416	9.45572	8.3008	9.73057	9.81951	9.44076
2398	sp|Q9NQ84-2|GPC5C_HUMAN	GPRC5C	GPC5C_HUMAN Isoform 2 of G-protein coupled receptor family C group 5 member C	399	VPSEGAYDIILPR	44.2778	R	K.VPSEGAY#DIILPR.A	1	1	1	39.9123	42.3517	33.1164	30.878	22.1795	35.6144	26.8219	34.9647	62.5704	62.4582	61.2225	452.09	102.82	67.804	74.103	70.9512	81.8719	96.1568	76.4083	83.1397	62.5704	65.7816	72.7412	854.348	12.0349	7.93635	8.67363	8.30472	9.58297	11.255	8.94347	9.73136	7.32376	7.69962	8.51423
2757	sp|Q08174-2|PCDH1_HUMAN	PCDH1	PCDH1_HUMAN Isoform 2 of Protocadherin-1	1158	LSTFVPYQDRGGQ	44.2778	U	K.LSTFVPY#QDR.G	1	1	1	39.6767	69.5832	47.2578	60.1788	33.124	33.9869	35.3636	49.5382	142.076	119.41	161.416	791.611	102.213	111.401	105.747	138.278	122.272	91.7628	100.741	117.793	142.076	125.764	191.786	1349.83	7.57227	8.25294	7.83405	10.2441	9.05829	6.79809	7.46326	8.72647	10.5254	9.317	14.2081
3354	sp|O15020|SPTN2_HUMAN	SPTBN2	SPTN2_HUMAN Spectrin beta chain, non-erythrocytic 2	2289	GSVAFDYRKRKHV	51.0043	R	R.AQGSVAFDY#R.K	1	1	1	39.5407	41.2058	31.4366	35.1532	30.7359	32.6706	37.9809	59.8493	67.191	53.8119	71.6088	501.185	101.863	65.9694	70.3441	80.7746	113.457	88.2087	108.197	142.311	67.191	56.6751	85.0815	980.072	10.3934	6.73108	7.17745	8.2417	11.5764	9.00022	11.0397	14.5204	6.85572	5.78275	8.68115
3199	sp|Q86SQ4-3|GP126_HUMAN	GPR126	GP126_HUMAN Isoform 3 of G-protein coupled receptor 126	1172	IGSNSTYLTSKSK	17.0091	R	K.SLSSSSIGSNSTY#LTSK.S	1	1	1	39.3446	56.2426	36.7294	41.1122	28.373	31.402	32.656	39.1031	77.6342	75.0571	233.695	691.349	101.358	90.0429	82.1877	94.4671	104.734	84.7836	93.0281	92.9801	77.6342	79.0508	277.663	1177.93	8.60472	7.64416	6.9773	8.01976	8.89139	7.19767	7.89759	7.89352	6.59074	6.71099	23.5722
3628	sp|P63010-2|AP2B1_HUMAN	AP2B1	AP2B1_HUMAN Isoform 2 of AP-2 complex subunit beta	328	KVFFVKYNDPIYV	65.4396	R	K.Y#NDPIYVK.L	1	1	1	39.3069	52.9906	69.7522	147.034	26.8572	47.4004	51.8172	113.99	129.852	144.307	221.002	1044.31	101.26	84.8366	156.081	337.852	99.139	127.978	147.613	271.048	129.852	151.985	262.582	1870.23	5.41433	4.53616	8.34557	18.0648	5.3009	6.84293	7.8928	14.4928	6.94313	8.12654	14.0401
1117	sp|P63000-2|RAC1_HUMAN	RAC1	RAC1_HUMAN Isoform B of Ras-related C3 botulinum toxin substrate 1	79	PQTVGETYGKDIT	30.8348	U	R.LRPLSYPQTVGET#YGK.D	0	1	1	39.1116	67.4366	46.1408	48.48	28.0764	37.2986	38.2222	44.4814	95.8459	91.8272	127.777	664.698	100.757	107.964	103.247	111.397	103.639	100.704	108.885	105.769	95.8459	96.7133	151.818	1186.74	8.49025	9.09755	8.70007	9.38679	8.73312	8.48579	9.17513	8.91255	8.0764	8.1495	12.7928
2638	sp|Q96S66|CLCC1_HUMAN	CLCC1	CLCC1_HUMAN Chloride channel CLIC-like protein 1	412	PTEQGPYAKTYEG	97.5963	R	R.GQM*GPTEQGPY#AK.T	1	1	1	38.9046	47.059	32.5428	31.2877	20.3173	29.8099	25.1629	35.1079	41.6616	51.9787	57.9546	411.787	100.224	75.3402	72.8195	71.8924	74.9981	80.4852	71.6825	83.4804	41.6616	54.7444	68.8584	796.187	12.588	9.46263	9.14604	9.0296	9.41966	10.1088	9.00322	10.485	5.23265	6.87582	8.64852
3612	sp|Q8IY63|AMOL1_HUMAN	AMOTL1	AMOL1_HUMAN Angiomotin-like protein 1	691	TKWEQKYLEESTI	59.2977	R	K.Y#LEESTIR.H	1	1	1	38.5185	35.1353	35.908	26.381	29.8439	34.2354	38.9094	36.2282	62.3202	49.921	50.9857	438.387	99.2292	56.2507	80.3496	60.618	110.164	92.4336	110.843	86.1441	62.3202	52.5773	60.5784	871.507	11.3859	6.45441	9.21961	6.95553	12.6406	10.6062	12.7185	9.8845	7.15085	6.03291	6.95099
2485	sp|Q5T0W9|FA83B_HUMAN	FAM83B	FA83B_HUMAN Protein FAM83B	896	NTEQIQYRDSREI	51.0043	U	R.FNTEQIQY#R.D	1	1	1	38.1796	54.0268	43.7834	33.519	26.846	36.7098	33.0202	27.7711	74.3204	72.0413	115.986	556.203	98.3562	86.4955	97.9722	77.0194	99.0978	99.1144	94.0657	66.0347	74.3204	75.8745	137.808	1006.16	9.77541	8.5966	9.73725	7.6548	9.84912	9.85077	9.34899	6.56305	7.38655	7.54101	13.6965
2272	sp|A4D1U4|LCHN_HUMAN	LCHN	LCHN_HUMAN Protein LCHN	213	SSLPPVYWLPSIH	58.5514	R	R.GSSLPPVY#WLPSIHR.Y	1	2	2	38.1744	51.1478	35.4508	32.0976	30.8087	34.3168	28.3997	41.8489	81.2919	84.2917	135.442	593.27	98.3428	81.8863	79.3265	73.7535	113.725	92.6534	80.903	99.5092	81.2919	88.7768	160.924	1051.09	9.35624	7.79058	7.54705	7.01684	10.8197	8.81495	7.69704	9.46721	7.73404	8.44614	15.3102
3138	sp|Q96FN4|CPNE2_HUMAN	CPNE2	CPNE2_HUMAN Copine-2	411	IRFYGPTNFSPIV	15.0073	R	R.FYGPT#NFSPIVNHVAR.F	0	1	1	37.8243	36.8661	40.4395	44.4242	28.31	40.5648	37.1592	41.4144	71.9719	67.9148	83.1901	530.079	97.4409	59.0217	90.4896	102.077	104.502	109.523	105.857	98.4761	71.9719	71.5285	98.8419	1009.73	9.65021	5.8453	8.96177	10.1094	10.3495	10.8467	10.4837	9.75272	7.12785	7.08393	9.78895
1079	sp|Q9UKY7|CDV3_HUMAN	CDV3	CDV3_HUMAN Protein CDV3 homolog	95	EQKEVDYSGLRVQ	24.437	R	K.EVDY#SGLR.V	1	1	1	37.5556	100.878	43.8345	44.4267	24.3436	36.3665	27.7158	36.762	198.26	262.409	286.418	1098.97	96.7486	161.504	98.0864	102.083	89.8605	98.1874	78.9549	87.4133	198.26	276.371	340.306	1627.78	5.94361	9.92173	6.0258	6.27133	5.52045	6.032	4.85048	5.37011	12.1798	16.9785	20.9062
3546	sp|O15031|PLXB2_HUMAN	PLXNB2	PLXB2_HUMAN Plexin-B2	1621	KAITEIYLTRLLS	24.2431	R	K.AITEIY#LTR.L	1	1	1	37.3806	50.8957	42.9339	36.3198	26.6965	33.14	45.1999	59.2195	71.8719	65.7972	85.1697	554.625	96.2978	81.4827	96.0713	83.4552	98.546	89.4762	128.762	140.813	71.8719	69.2982	101.194	1057.27	9.10816	7.70691	9.08674	7.89347	9.32081	8.46296	12.1788	13.3186	6.79789	6.55445	9.57126
1648	sp|Q9Y5S2|MRCKB_HUMAN	CDC42BPB	MRCKB_HUMAN Serine/threonine-protein kinase MRCK beta	1638	PSRNKPYISWPSS	20.1669	U	R.NKPY#ISWPSSGGSEPSVTVPLR.S	1	1	1	37.218	65.7497	34.3873	28.185	26.005	22.5494	22.3158	21.9536	71.6753	76.9055	45.2908	452.235	95.879	105.264	76.9468	64.7632	95.9931	60.8822	63.5717	52.2016	71.6753	80.9976	53.812	821.986	11.6643	12.806	9.36109	7.87886	11.6782	7.40672	7.73392	6.35067	8.71977	9.85389	6.54659
3595	sp|P55082|MFAP3_HUMAN	MFAP3	MFAP3_HUMAN Microfibril-associated glycoprotein 3	357	NYKDGAYENCQLx	1000	R	K.DGAY#ENCQL.-	1	1	1	37.1442	43.0426	40.8065	34.7599	25.2433	33.4486	31.5096	24.2976	57.8759	48.2386	36.5937	412.96	95.6889	68.9101	91.3107	79.8709	93.1814	90.3094	89.7623	57.7752	57.8759	50.8054	43.4786	818.969	11.6841	8.41425	11.1495	9.75262	11.3779	11.0272	10.9604	7.05463	7.06692	6.20358	5.30894
3326	sp|P58107|EPIPL_HUMAN	EPPK1	EPIPL_HUMAN Epiplakin	1331	AGYPDPYSRASLS	24.437	R	R.AAAGYPDPY#SR.A	1	1	1	37.1325	33.4161	30.3886	44.0118	32.245	32.0058	28.0278	37.1665	50.1981	37.5748	42.4077	404.575	95.6586	53.4983	67.9992	101.13	119.027	86.4138	79.8438	88.3753	50.1981	39.5741	50.3864	832.105	11.496	6.42927	8.17196	12.1535	14.3044	10.385	9.5954	10.6207	6.03267	4.7559	6.0553
1504	sp|Q14677-3|EPN4_HUMAN	CLINT1	EPN4_HUMAN Isoform 3 of Clathrin interactor 1	293	LGAAAHYTGDKAS	17.0091	R	K.TIDLGAAAHY#TGDK.A	1	1	1	37.0923	122.62	99.7954	161.745	23.6596	42.9893	52.4708	111.857	438.138	434.233	387.309	1911.91	95.5551	196.311	223.308	371.656	87.3357	116.069	149.475	265.975	438.138	457.338	460.178	2861.34	3.33953	6.8608	7.8043	12.9889	3.05227	4.05645	5.22396	9.29547	15.3123	15.9834	16.0826
2299	sp|Q01518|CAP1_HUMAN	CAP1	CAP1_HUMAN Adenylyl cyclase-associated protein 1	31	SDMHRGYADSPSK	20.9846	R	R.LEAVSHTSDM*HRGY#ADSPSK.A	1	1	1	36.6588	43.6869	48.3154	46.2594	33.6714	50.4546	52.9261	54.0605	77.2027	78.9029	68.9136	591.052	94.4384	69.9416	108.113	106.294	124.293	136.225	150.772	128.546	77.2027	83.1012	81.8793	1160.81	8.13559	6.02526	9.31361	9.15693	10.7074	11.7353	12.9886	11.0739	6.65078	7.15892	7.05365
2142	sp|O00459|P85B_HUMAN	PIK3R2	P85B_HUMAN Phosphatidylinositol 3-kinase regulatory subunit beta	460	QDKSREYDQLYEE	24.2431	R	K.SREY#DQLYEEYTR.T	1	2	1	36.6306	71.1721	79.8218	70.1246	30.4937	78.592	76.4558	101.395	133.91	129.475	100.851	908.922	94.3658	113.945	178.613	161.131	112.563	212.194	217.802	241.1	133.91	136.364	119.826	1721.81	5.48061	6.61771	10.3736	9.35823	6.53744	12.3239	12.6496	14.0027	7.77728	7.91979	6.95926
1262	sp|Q07912-3|ACK1_HUMAN	TNK2	ACK1_HUMAN Isoform 3 of Activated CDC42 kinase 1	937	KVSSTHYYLLPER	17.0091	R	K.VSSTHY#YLLPERPSYLER.Y	1	1	1	36.5794	123.598	125.92	70.2955	20.6626	103.723	118.058	74.9922	146.124	114.713	58.8874	993.553	94.2338	197.878	281.766	161.524	76.2726	280.046	336.314	178.318	146.124	120.817	69.9667	1943.26	4.84926	10.1828	14.4997	8.31202	3.92498	14.4111	17.3067	9.17623	7.51955	6.21722	3.60048
387	sp|P00533|EGFR_HUMAN	EGFR	EGFR_HUMAN Epidermal growth factor receptor	991	ERMHLPSPTDSNF	31.2747	R	R.M*HLPS#PTDS#NFYR.A	0	1	1	36.5756	29.2456	29.7948	24.1113	20.4636	26.3574	22.0995	27.0847	62.4634	53.498	51.1116	382.806	94.2241	46.8215	66.6704	55.4026	75.5383	71.1636	62.9556	64.4026	62.4634	56.3445	60.7279	716.715	13.1467	6.53279	9.30222	7.73008	10.5395	9.92914	8.78392	8.98581	8.71524	7.8615	8.4731
2756	sp|Q08174-2|PCDH1_HUMAN	PCDH1	PCDH1_HUMAN Isoform 2 of Protocadherin-1	1089	ALPEDHYERTTPD	1000	R	R.LGPLALPEDHY#ER.T	1	1	1	36.5329	75.3722	44.0989	38.3905	21.7981	33.4847	34.3077	42.365	108.65	94.894	108.402	638.296	94.1142	120.669	98.678	88.2132	80.4642	90.4067	97.7334	100.736	108.65	99.9432	128.797	1108.41	8.49096	10.8867	8.90269	7.95857	7.25946	8.15647	8.81748	9.08841	9.80234	9.01685	11.6201
3614	sp|P43378|PTN9_HUMAN	PTPN9	PTN9_HUMAN Tyrosine-protein phosphatase non-receptor type 9	333	NLEKNRYGDVPCL	104.198	U	K.NRY#GDVPCLDQTR.V	1	1	1	36.3208	31.4302	37.1718	79.7502	30.3445	43.2885	61.4087	147.601	87.1525	91.4438	83.5056	729.418	93.5678	50.3189	83.1776	183.249	112.012	116.877	174.937	350.969	87.1525	96.3095	99.2167	1447.79	6.46282	3.47557	5.74516	12.6572	7.73676	8.07278	12.0831	24.2418	6.01971	6.65219	6.853
1032	sp|Q5VW32|BROX_HUMAN	BROX	BROX_HUMAN BRO1 domain-containing protein BROX	21	PVSFNYYGVVTGP	30.8348	R	K.ATAPVSFNYY#GVVTGPSASK.I	1	1	1	36.0885	36.8288	27.1551	63.398	24.8013	25.5855	30.0916	82.7514	90.8169	83.3278	161.388	662.233	92.9694	58.9619	60.7636	145.675	91.5501	69.0795	85.723	196.768	90.8169	87.7615	191.752	1171.82	7.93375	5.03165	5.1854	12.4315	7.81264	5.89506	7.31536	16.7916	7.75006	7.48933	16.3636
2092	sp|Q96JG6|CC132_HUMAN	CCDC132	CC132_HUMAN Coiled-coil domain-containing protein 132	571	EELKRDYVDEQTG	111.687	R	K.RDY#VDEQTGDGPVK.S	1	1	1	35.9216	61.0661	46.6101	43.8813	39.5797	51.7675	57.7373	59.8858	108.194	127.611	173.685	805.94	92.5393	97.7652	104.297	100.83	146.102	139.769	164.478	142.398	108.194	134.401	206.363	1437.14	6.43914	6.80277	7.25729	7.01602	10.1662	9.72555	11.4448	9.90843	7.52847	9.35198	14.3593
3105	sp|P05067|A4_HUMAN	APP	A4_HUMAN Amyloid beta A4 protein	762	GYENPTYKFFEQM	24.437	R	K.M*QQNGYENPTY#K.F	1	1	1	35.8575	28.6244	27.6119	14.5455	11.8631	12.8949	17.9173	13.9744	20.5438	18.602	16.1261	218.561	92.3742	45.8269	61.7859	33.4224	43.7907	34.8155	51.0415	33.2285	20.5438	19.5918	19.1602	455.581	20.2761	10.059	13.562	7.3362	9.61205	7.642	11.2036	7.29365	4.50935	4.30039	4.20566
624	sp|P42566|EPS15_HUMAN	EPS15	EPS15_HUMAN Epidermal growth factor receptor substrate 15	849	FANFSAYPSEEDM	44.2778	R	K.EADPSNFANFSAY#PSEEDM*IEWAK.R	1	18	5	35.8205	96.1918	81.8529	71.7886	29.67	55.5246	55.2059	63.9181	296.679	337.838	256.673	1381.16	92.2787	154.001	183.158	164.955	109.522	149.913	157.267	151.986	296.679	355.814	304.964	2120.54	4.35167	7.26233	8.63736	7.77892	5.16483	7.06959	7.41636	7.16732	13.9907	16.7794	14.3815
574	sp|Q9Y446|PKP3_HUMAN	PKP3	PKP3_HUMAN Plakophilin-3	195	GGLDDRYSLVSEQ	24.437	R	R.Y#SLVSEQLEPAATSTYR.A	1	3	3	35.6102	202.287	70.0619	60.8053	20.4067	55.9836	48.7026	49.8534	394.99	374.311	278.715	1591.73	91.7371	323.856	156.774	139.718	75.3281	151.153	138.741	118.542	394.99	394.227	331.154	2316.22	3.96064	13.9821	6.76854	6.03214	3.2522	6.52583	5.98996	5.11793	17.0532	17.0203	14.2972
2514	sp|Q96FW1|OTUB1_HUMAN	OTUB1	OTUB1_HUMAN Ubiquitin thioesterase OTUB1	68	AEDDNIYQQKIKD	46.1286	R	K.EYAEDDNIY#QQK.I	1	1	1	35.5649	50.0065	78.1372	64.6485	36.6888	57.1832	70.8874	92.0172	159.399	159.747	91.748	896.028	91.6203	80.059	174.844	148.548	135.431	154.392	201.939	218.8	159.399	168.247	109.01	1642.29	5.57882	4.87484	10.6464	9.0452	8.24647	9.40099	12.2962	13.3229	9.70591	10.2447	6.63767
3548	sp|P29084|T2EB_HUMAN	GTF2E2	T2EB_HUMAN Transcription initiation factor IIE subunit beta	284	AGVLKDYSDITSS	24.437	U	K.DY#SDITSSK.-	1	1	1	34.8477	67.9295	46.7688	51.0975	29.0877	40.1104	40.9923	48.4259	119.667	137.117	175.186	791.23	89.7727	108.753	104.652	117.411	107.373	108.296	116.776	115.148	119.667	144.413	208.146	1340.41	6.69741	8.11345	7.80749	8.75936	8.01044	8.07931	8.71198	8.59052	8.92768	10.7738	15.5286
1785	sp|Q8IX03-2|KIBRA_HUMAN	WWC1	KIBRA_HUMAN Isoform 2 of Protein KIBRA	128	ELAQQEYQQLHAV	1000	R	R.LELAQQEY#QQLHAVWEHK.L	1	1	1	34.7847	36.8297	34.9765	29.1473	31.93	33.9294	25.4973	30.0122	52.0249	52.1	41.0546	402.286	89.6104	58.9633	78.2652	66.9743	117.864	91.6075	72.635	71.3636	52.0249	54.8721	48.7788	802.96	11.16	7.34325	9.7471	8.34094	14.6787	11.4087	9.0459	8.88757	6.47914	6.83374	6.07487
3711	sp|P05556|ITB1_HUMAN	ITGB1	ITB1_HUMAN Integrin beta-1	783	TGENPIYKSAVTT	23.6238	U	K.WDTGENPIY#K.S	1	1	1	34.7402	41.849	27.4221	21.0059	18.6681	23.5571	22.9837	25.072	49.644	46.9282	49.0475	360.918	89.4958	66.9991	61.3611	48.2671	68.9102	63.6029	65.4744	59.6166	49.644	49.4252	58.2755	681.072	13.1404	9.83731	9.00949	7.08693	10.1179	9.33864	9.61343	8.75336	7.2891	7.25697	8.55643
915	sp|Q9BY77|PDIP3_HUMAN	POLDIP3	PDIP3_HUMAN Polymerase delta-interacting protein 3	236	VVQNDAYTAPALP	30.8348	R	K.VVQNDAY#TAPALPSSIR.T	1	1	1	34.5953	64.5063	41.5016	42.9984	19.6892	35.3232	38.1417	36.5908	80.7459	111.897	128.588	634.578	89.1225	103.273	92.8661	98.8013	72.6797	95.3707	108.656	87.0064	80.7459	117.851	152.781	1099.15	8.10829	9.39568	8.44888	8.98885	6.61234	8.67674	9.88539	7.91577	7.3462	10.722	13.8999
1037	sp|P21333|FLNA_HUMAN	FLNA	FLNA_HUMAN Filamin-A	1308	GNLTETYVQDRGD	30.8348	R	R.VANPSGNLTETY#VQDR.G	1	2	2	34.4144	70.4907	46.5231	63.2767	30.1619	44.8662	57.732	97.222	90.839	97.2398	120.736	753.502	88.6566	112.854	104.103	145.396	111.338	121.136	164.463	231.176	90.839	102.414	143.452	1415.83	6.26182	7.97087	7.35278	10.2694	7.86381	8.55585	11.616	16.328	6.41596	7.2335	10.132
717	sp|Q86X29|LSR_HUMAN	LSR	LSR_HUMAN Lipolysis-stimulated lipoprotein receptor	615	EEEEEAYYPPAPP	48.8739	R	K.EEEEEAY#YPPAPPPYSETDSQASR.E	1	6	2	34.355	77.505	43.1575	42.1504	26.3164	41.7809	31.918	37.6186	140.411	132.123	111.695	719.03	88.5035	124.083	96.5714	96.8527	97.1428	112.806	90.9258	89.4503	140.411	139.153	132.709	1208.61	7.32276	10.2666	7.99029	8.01356	8.03757	9.33354	7.52318	7.40109	11.6176	11.5135	10.9803
598	sp|Q12774|ARHG5_HUMAN	ARHGEF5	ARHG5_HUMAN Rho guanine nucleotide exchange factor 5	1140	LVSSESYLQRLSM	30.8348	R	K.ALVSSESY#LQR.L	1	2	2	33.9093	267.378	144.543	93.7254	21.0552	99.4162	79.0526	79.9544	455.212	431.273	419.039	2124.56	87.3553	428.065	323.437	215.361	77.7218	268.418	225.2	190.117	455.212	454.22	497.879	3222.99	2.71039	13.2816	10.0353	6.68203	2.41148	8.32824	6.9873	5.89879	14.1239	14.0931	15.4478
999	sp|Q9UQC2|GAB2_HUMAN	GAB2	GAB2_HUMAN GRB2-associated-binding protein 2	293	TDNEDVYTFKTPS	17.0091	R	K.GSLTGSETDNEDVY#TFK.T	1	1	1	33.8339	82.2072	38.5568	32.9778	17.9856	47.0534	32.6796	34.9159	190.221	169.545	132.348	812.325	87.161	131.612	86.2768	75.7759	66.391	127.041	93.0956	83.0238	190.221	178.567	157.249	1276.41	6.82858	10.311	6.75931	5.93663	5.20137	9.953	7.29352	6.50445	14.9028	13.9897	12.3196
2418	sp|Q5VZK9|LR16A_HUMAN	LRRC16A	LR16A_HUMAN Leucine-rich repeat-containing protein 16A	1339	GQQAQEYQEQKQR	91.0686	R	R.SWGQQAQEY#QEQK.Q	1	1	1	33.7491	46.8254	40.0999	41.7732	35.839	42.2755	41.226	57.0168	97.5339	86.6121	84.9191	607.87	86.9426	74.9662	89.7297	95.986	132.294	114.141	117.442	135.576	97.5339	91.2206	100.896	1136.73	7.6485	6.59491	7.89368	8.44405	11.6381	10.0412	10.3316	11.9268	8.58023	8.02484	8.87601
2881	sp|Q96A65|EXOC4_HUMAN	EXOC4	EXOC4_HUMAN Exocyst complex component 4	247	FLDTSHYSTAGSS	30.8348	R	K.FLDTSHY#STAGSSSVR.E	1	1	1	33.651	49.6766	53.9142	62.0332	38.1378	59.0026	48.1066	65.0924	113.828	121.047	194.342	838.832	86.69	79.5309	120.641	142.539	140.779	159.304	137.043	154.778	113.828	127.488	230.906	1493.53	5.80438	5.32504	8.07761	9.54379	9.42597	10.6663	9.17578	10.3633	7.6214	8.53604	15.4605
1614	sp|O43609|SPY1_HUMAN	SPRY1	SPY1_HUMAN Protein sprouty homolog 1	89	INVNNNYEHRHTS	205.176	R	R.THEIIPINVNNNY#EHR.H	1	1	1	33.2263	59.1204	48.3964	38.9455	29.6664	42.9073	44.0292	37.7465	173.301	150.786	95.3391	753.464	85.5958	94.6502	108.294	89.4885	109.509	115.847	125.427	89.7544	173.301	158.809	113.277	1263.95	6.77207	7.48843	8.56791	7.08004	8.66398	9.16548	9.92341	7.10109	13.711	12.5645	8.96209
2270	sp|Q9Y2W1|TR150_HUMAN	THRAP3	TR150_HUMAN Thyroid hormone receptor-associated protein 3	344	ASGGAAYTKRYLE	17.0091	U	K.EESAASGGAAY#TK.R	1	1	1	33.1873	32.8376	37.2084	25.1041	29.5224	25.6582	24.5852	22.8968	43.4292	37.2825	24.604	336.316	85.4953	52.5722	83.2595	57.6838	108.977	69.2758	70.0366	54.4444	43.4292	39.2662	29.2332	693.673	12.325	7.57881	12.0027	8.3157	15.7102	9.98681	10.0965	7.8487	6.26076	5.66062	4.21425
1729	sp|O75955|FLOT1_HUMAN	FLOT1	FLOT1_HUMAN Flotillin-1	223	ELKKAAYDIEVNT	87.265	R	K.AAY#DIEVNTR.R	1	1	1	32.7943	88.4183	56.9691	42.9597	27.1273	36.9487	41.2675	43.8501	143.576	148.815	132.575	795.301	84.4829	141.555	127.477	98.7123	100.136	99.7594	117.56	104.268	143.576	156.733	157.519	1331.78	6.34361	10.6291	9.57194	7.41207	7.51898	7.49069	8.82729	7.8292	10.7808	11.7687	11.8277
2430	sp|O43768-4|ENSA_HUMAN	ENSA	ENSA_HUMAN Isoform 4 of Alpha-endosulfine	87	KSVEQKYFDSGDY	73.3109	R	K.Y#FDSGDYNMAK.A	1	2	2	32.7088	348.123	213.799	186.451	35.378	145.029	91.848	143.116	555.533	507.574	654.395	2913.96	84.2627	557.336	478.409	428.424	130.592	391.571	261.65	340.304	555.533	534.581	777.516	4540.18	1.85593	12.2756	10.5372	9.43628	2.87636	8.62458	5.763	7.49539	12.2359	11.7744	17.1252
1825	sp|Q13191|CBLB_HUMAN	CBLB	CBLB_HUMAN E3 ubiquitin-protein ligase CBL-B	763	IPDLSIYLKGDVF	59.2977	R	K.SNIPDLSIY#LK.G	1	1	1	32.4286	111.804	61.2838	43.3969	12.5692	36.5023	33.0904	28.2539	302.401	263.735	188.226	1113.69	83.5409	178.995	137.132	99.7169	46.3972	98.5542	94.2657	67.1827	302.401	277.768	223.639	1609.59	5.19019	11.1205	8.51966	6.19516	2.88254	6.12293	5.85649	4.17389	18.7874	17.2571	13.8942
2985	sp|P31939|PUR9_HUMAN	ATIC	PUR9_HUMAN Bifunctional purine biosynthesis protein PURH	208	SQMPLRYGMNPHQ	60.6819	R	R.Y#GMNPHQTPAQLYTLQPK.L	1	1	1	32.1961	65.2752	34.3908	36.3484	28.2677	29.8437	24.9908	29.6721	77.7248	53.0502	57.1368	468.897	82.9417	104.504	76.9547	83.5209	104.346	80.5762	71.192	70.555	77.7248	55.873	67.8867	876.075	9.46743	11.9287	8.78403	9.53354	11.9106	9.19742	8.12625	8.05354	8.87194	6.37765	7.74897
3164	sp|P31949|S10AB_HUMAN	S100A11	S10AB_HUMAN Protein S100-A11	32	GKDGYNYTLSKTE	24.437	U	K.DGYNY#TLSK.T	1	1	1	32.1299	76.3455	120.939	211.261	41.0043	110.564	126.13	302.129	444.179	427.028	404.724	2296.43	82.7713	122.227	270.62	485.434	151.361	298.517	359.311	718.408	444.179	449.75	480.871	3863.45	2.14242	3.16368	7.00463	12.5648	3.91777	7.72669	9.30027	18.595	11.497	11.6411	12.4467
1277	sp|O15231-6|ZN185_HUMAN	ZNF185	ZN185_HUMAN Isoform 6 of Zinc finger protein 185	652	PCGSTPYSERTTG	17.0091	R	K.KPPCGSTPY#SER.T	1	1	1	31.9551	196.981	116.853	57.7711	18.6275	99.4383	67.2381	47.561	223.783	175.557	87.2838	1123.05	82.3209	315.362	261.477	132.746	68.7604	268.478	191.543	113.091	223.783	184.898	103.706	1946.17	4.2299	16.2043	13.4355	6.82088	3.53312	13.7952	9.8421	5.81099	11.4987	9.50061	5.32873
1583	sp|Q9NYB9|ABI2_HUMAN	ABI2	ABI2_HUMAN Abl interactor 2	213	PVVPNDYVPSPTR	17.2497	R	R.TLEPVRPPVVPNDY#VPSPTR.N	1	1	1	31.9135	123.564	66.629	41.9359	14.2079	46.0288	33.5498	36.8532	231.546	192.058	132.707	950.993	82.2139	197.822	149.093	96.3597	52.4464	124.275	95.5744	87.6304	231.546	202.277	157.675	1476.91	5.56661	13.3943	10.0949	6.5244	3.55108	8.41452	6.47123	5.93335	15.6777	13.6959	10.676
1450	sp|Q8N4S9|MALD2_HUMAN	MARVELD2	MALD2_HUMAN MARVEL domain-containing protein 2	23	VPSDLPYQDTTIR	37.5398	R	R.YDEVPSDLPY#QDTTIR.T	1	3	2	31.877	160.206	85.8481	60.2261	17.9172	51.5803	44.2714	45.968	232.258	224.238	186.529	1140.92	82.1199	256.486	192.098	138.387	66.1385	139.264	126.117	109.304	232.258	236.169	221.624	1799.96	4.56231	14.2495	10.6723	7.68831	3.67444	7.73704	7.00665	6.07255	12.9035	13.1208	12.3127
1394	sp|Q5XXA6|ANO1_HUMAN	ANO1	ANO1_HUMAN Anoctamin-1	7	MRVNEKYSTLPAE	24.437	R	K.Y#STLPAEDR.S	1	1	1	31.8045	243.396	108.124	117.047	16.2327	75.172	54.4662	88.3851	213.13	215.756	184.398	1347.91	81.9331	389.671	241.944	268.948	59.9204	202.96	155.16	210.164	213.13	227.236	219.091	2270.16	3.60914	17.1649	10.6576	11.8471	2.63948	8.94036	6.83475	9.25768	9.38833	10.0097	9.65093
1527	sp|Q9Y2D5-4|AKAP2_HUMAN	AKAP2	AKAP2_HUMAN Isoform 2 of A-kinase anchor protein 2	915	GSYFSKYSEAAEL	24.437	R	K.Y#SEAAELR.S	1	1	1	31.6839	37.1234	38.3141	21.0566	19.2901	34.1896	26.0891	28.2952	58.1844	54.9724	38.413	387.612	81.6223	59.4336	85.7336	48.3836	71.2062	92.3101	74.3209	67.2808	58.1844	57.8974	45.6401	742.013	11.0001	8.00978	11.5542	6.52058	9.59636	12.4405	10.0161	9.06733	7.84142	7.80275	6.15085
2729	sp|O75131|CPNE3_HUMAN	CPNE3	CPNE3_HUMAN Copine-3	392	LPQIKLYGPTNFS	15.0073	U	K.LY#GPTNFSPIINHVAR.F	1	1	1	31.6838	37.293	31.8561	33.0426	29.1548	23.0095	30.6311	26.1852	49.8593	42.9923	353.335	689.042	81.6221	59.7051	71.2828	75.9248	107.62	62.1243	87.2599	62.2638	49.8593	45.2799	419.813	1122.76	7.26981	5.31773	6.34892	6.76237	9.58537	5.5332	7.77195	5.54563	4.4408	4.03293	37.3913
3137	sp|O00151|PDLI1_HUMAN	PDLIM1	PDLI1_HUMAN PDZ and LIM domain protein 1	321	VTPPEGYEVVTVF	15.3812	U	R.VTPPEGY#EVVTVFPK.-	1	1	1	31.4855	187.733	111.348	95.439	32.4884	78.0977	64.9338	84.9319	253.688	274.076	253.649	1467.87	81.1113	300.555	249.158	219.298	119.926	210.859	184.979	201.953	253.688	288.659	301.372	2411.56	3.36344	12.4631	10.3318	9.09364	4.97295	8.74369	7.67052	8.37436	10.5197	11.9698	12.497
2151	sp|Q9UQB8|BAIP2_HUMAN	BAIAP2	BAIP2_HUMAN Brain-specific angiogenesis inhibitor 1-associated protein 2	505	SQGLDDYGARSMS	54.2049	R	K.QRPYSVAVPAFSQGLDDY#GAR.S	1	1	1	31.3421	74.5815	43.0741	39.5036	18.2483	39.7052	35.7811	32.4636	130.501	137.286	105.732	688.218	80.7417	119.403	96.385	90.7708	67.3606	107.202	101.931	77.1925	130.501	144.591	125.625	1141.7	7.07205	10.4583	8.44221	7.95048	5.90001	9.38963	8.92797	6.76118	11.4304	12.6645	11.0033
1100	sp|Q9BXF6|RFIP5_HUMAN	RAB11FIP5	RFIP5_HUMAN Rab11 family-interacting protein 5	344	VNGSHIYNEEPQG	104.477	U	R.SSLCVNGSHIY#NEEPQGPVR.H	1	1	1	31.0094	21.3187	16.7419	25.0539	17.5279	16.9532	15.0112	15.5907	60.1618	77.5054	63.9589	360.833	79.8849	34.1307	37.4626	57.5685	64.7013	45.7727	42.7629	37.0719	60.1618	81.6294	75.9924	617.139	12.9444	5.53047	6.07037	9.32828	10.4841	7.41692	6.92921	6.00706	9.7485	13.2271	12.3137
3247	sp|Q6NZI2|PTRF_HUMAN	PTRF	PTRF_HUMAN Polymerase I and transcript release factor	156	NFKVMIYQDEVKL	1000	U	K.VM*IY#QDEVK.L	1	1	1	30.8012	349.082	61.3601	73.0429	28.6342	44.3601	46.3745	79.8089	202.717	162.741	173.329	1252.25	79.3483	558.871	137.303	167.837	105.699	119.77	132.109	189.771	202.717	171.4	205.94	2070.76	3.83184	26.9886	6.63053	8.10508	5.10433	5.78384	6.3797	9.16431	9.78949	8.27713	9.9451
1377	sp|P40763|STAT3_HUMAN	STAT3	STAT3_HUMAN Signal transducer and activator of transcription 3	705	PGSAAPYLKTKFI	33.6572	R	K.YCRPESQEHPEADPGSAAPY#LK.T	1	2	2	30.7167	161.682	116.372	61.6315	33.7799	133.788	112.241	139.008	178.273	147.966	69.5062	1184.97	79.1307	258.848	260.401	141.616	124.693	361.219	319.745	330.537	178.273	155.839	82.5835	2292.89	3.45114	11.2892	11.3569	6.17632	5.43826	15.7539	13.9451	14.4158	7.77506	6.79665	3.60172
363	sp|P21860|ERBB3_HUMAN	ERBB3	ERBB3_HUMAN Receptor tyrosine-protein kinase erbB-3	1328	AFDNPDYWHSRLF	44.2778	R	R.SLEATDSAFDNPDY#WHSR.L	1	1	1	30.6924	47.8088	36.4734	23.1038	22.9329	34.4606	38.9822	34.907	61.9973	56.2941	40.7595	428.412	79.0681	76.5406	81.6149	53.0877	84.6531	93.0418	111.05	83.0026	61.9973	59.2894	48.4282	831.774	9.50597	9.20209	9.81215	6.38247	10.1774	11.186	13.351	9.979	7.45363	7.12807	5.82228
1497	sp|Q12846|STX4_HUMAN	STX4	STX4_HUMAN Syntaxin-4	115	EEADENYNSVNTR	37.5398	R	K.AIEPQKEEADENY#NSVNTR.M	1	3	2	30.6182	299.142	251.292	110.911	37.0462	242.873	215.565	185.31	419.511	433.613	207.224	2433.11	78.8769	478.919	562.305	254.85	136.75	655.744	614.087	440.633	419.511	456.685	246.212	4344.57	1.81553	11.0234	12.9427	5.86595	3.14761	15.0934	14.1346	10.1421	9.65597	10.5116	5.66712
1362	sp|Q9UM54-6|MYO6_HUMAN	MYO6	MYO6_HUMAN Isoform 6 of Unconventional myosin-VI	1182	IRPADQYKDPQSK	1000	R	R.IPFIRPADQY#K.D	1	1	1	30.4829	158.362	100.901	110.584	32.8129	79.4202	57.2298	69.7518	181.509	223.312	171.799	1216.16	78.5283	253.533	225.781	254.098	121.124	214.43	163.032	165.857	181.509	235.194	204.123	2097.21	3.74442	12.0891	10.7658	12.116	5.77547	10.2245	7.77378	7.90847	8.65478	11.2146	9.73306
1148	sp|Q9NZM3|ITSN2_HUMAN	ITSN2	ITSN2_HUMAN Intersectin-2	553	YQNKLIYLVPEKQ	1000	R	K.LIY#LVPEK.Q	1	2	2	30.1507	39.1274	98.6039	290.228	42.1413	94.2919	174.52	471.475	282.582	307.841	352.358	2183.32	77.6727	62.6419	220.641	666.882	155.558	254.583	497.16	1121.08	282.582	324.221	418.652	4081.68	1.90296	1.53471	5.40565	16.3384	3.81113	6.23722	12.1803	27.4662	6.92319	7.94333	10.2569
2916	sp|P60660-2|MYL6_HUMAN	MYL6	MYL6_HUMAN Isoform Smooth muscle of Myosin light polypeptide 6	89	QGTYEDYVEGLRV	13.3795	R	K.DQGTYEDY#VEGLR.V	1	1	1	29.9224	35.6796	29.2142	26.1681	18.2065	23.0422	32.5009	24.1421	49.0476	51.8224	42.7043	362.451	77.0846	57.1221	65.3713	60.1288	67.2065	62.2126	92.5865	57.4057	49.0476	54.5799	50.7388	693.484	11.1155	8.23697	9.4265	8.67054	9.69114	8.97101	13.3509	8.27786	7.07264	7.87038	7.3165
2140	sp|O00459|P85B_HUMAN	PIK3R2	P85B_HUMAN Phosphatidylinositol 3-kinase regulatory subunit beta	453	KVYHQQYQDKSRE	58.5514	R	K.VYHQQY#QDK.S	1	1	1	29.886	32.3538	36.7775	31.7673	12.734	39.5534	31.8789	41.2925	79.7649	82.3284	54.4841	472.821	76.9907	51.7976	82.2954	72.9945	47.0056	106.792	90.8145	98.1861	79.7649	86.709	64.735	858.085	8.97239	6.03642	9.59058	8.50667	5.47796	12.4454	10.5834	11.4425	9.29568	10.1049	7.54412
2138	sp|O00459|P85B_HUMAN	PIK3R2	P85B_HUMAN Phosphatidylinositol 3-kinase regulatory subunit beta	428	LYPVSKYQQDQIV	1000	R	K.Y#QQDQIVK.E	1	1	1	29.561	136.046	123.548	116.227	20.6348	110.703	103.936	117.919	232.575	233.447	156.1	1380.7	76.1534	217.807	276.457	267.066	76.1702	298.892	296.087	280.389	232.575	245.868	185.469	2452.93	3.10459	8.87944	11.2705	10.8876	3.10527	12.1851	12.0707	11.4308	9.4815	10.0234	7.56111
2984	sp|Q9UPU5|UBP24_HUMAN	USP24	UBP24_HUMAN Ubiquitin carboxyl-terminal hydrolase 24	2024	YDQTNPYTDVRRR	24.437	R	K.VYDQTNPY#TDVR.R	1	1	1	29.5472	62.6865	45.5866	44.0619	28.669	39.631	45.6232	64.0267	105.209	107.272	74.26	646.573	76.118	100.359	102.007	101.245	105.827	107.002	129.968	152.244	105.209	112.98	88.2316	1181.19	6.44417	8.49646	8.63594	8.57142	8.95934	9.05879	11.0032	12.889	8.90706	9.56491	7.46972
2103	sp|Q7KZF4|SND1_HUMAN	SND1	SND1_HUMAN Staphylococcal nuclease domain-containing protein 1	329	LRIWRDYVAPTAN	76.7327	U	R.DY#VAPTANLDQK.D	1	3	2	29.4677	118.604	265.823	706.955	43.7235	257.308	328.252	994.285	1222.72	1150.73	1064.78	6182.65	75.9132	189.881	594.819	1624.43	161.398	694.719	935.103	2364.23	1222.72	1211.96	1265.11	10340.3	0.73415	1.83632	5.75245	15.7097	1.56087	6.71856	9.0433	22.8643	11.8248	11.7207	12.2348
2382	sp|O75369-8|FLNB_HUMAN	FLNB	FLNB_HUMAN Isoform 8 of Filamin-B	2533	SSTETCYSAIPKA	24.437	R	R.SSTETCY#SAIPK.A	1	1	1	29.3841	111.092	65.5126	54.819	15.5731	61.7182	35.1142	40.1182	169.297	161.244	148.454	892.327	75.6977	177.855	146.594	125.962	57.4857	166.636	100.031	95.3939	169.297	169.824	176.385	1461.16	5.18065	12.1722	10.0327	8.6207	3.93425	11.4043	6.84599	6.52863	11.5865	11.6225	12.0715
1463	sp|Q5T0Z8|CF132_HUMAN	C6orf132	CF132_HUMAN Uncharacterized protein C6orf132	1067	LIKKRLYVGEPHR	1000	U	K.RLY#VGEPHR.G	1	1	1	29.2221	28.4662	31.5758	17.5504	12.3153	17.3173	13.385	15.2427	58.947	49.8088	26.2002	300.031	75.2804	45.5737	70.6557	40.3271	45.4601	46.7557	38.1302	36.2444	58.947	52.459	31.1296	540.963	13.916	8.42455	13.0611	7.45469	8.40356	8.64304	7.04857	6.69998	10.8967	9.69735	5.75448
1419	sp|Q92796|DLG3_HUMAN	DLG3	DLG3_HUMAN Disks large homolog 3	808	EDQSGHYIWVPSP	23.6238	R	K.QIIEDQSGHY#IWVPSPEK.L	1	1	1	29.2201	43.9138	33.4556	41.742	20.4589	38.9226	35.0831	51.0336	60.8962	58.8801	60.7752	474.381	75.2752	70.3048	74.8619	95.9143	75.5208	105.089	99.9425	121.349	60.8962	62.013	72.2097	913.376	8.24143	7.69724	8.19618	10.5011	8.26832	11.5055	10.9421	13.2857	6.66716	6.78943	7.9058
3554	sp|Q9UHR4|BI2L1_HUMAN	BAIAP2L1	BI2L1_HUMAN Brain-specific angiogenesis inhibitor 1-associated protein 2-like protein 1	163	EHKEIEYVETVTS	37.5398	U	K.EIEY#VETVTSR.Q	1	1	1	29.1104	37.595	30.8394	25.7305	19.7493	25.7138	24.6665	20.4323	55.7326	56.3663	48.0556	373.992	74.9928	60.1886	69.0078	59.1231	72.9015	69.4258	70.2684	48.5844	55.7326	59.3655	57.097	696.687	10.7642	8.63926	9.90513	8.48632	10.464	9.96513	10.0861	6.97363	7.99966	8.5211	8.1955
2940	sp|O43390-2|HNRPR_HUMAN	HNRNPR	HNRPR_HUMAN Isoform 2 of Heterogeneous nuclear ribonucleoprotein R	438	TAYEDYYYHPPPR	48.8739	R	R.STAYEDYY#YHPPPR.M	1	1	1	29.0784	48.3789	37.6084	38.1021	17.7955	34.8938	36.4627	30.2185	80.4428	81.2621	71.1	505.343	74.9101	77.4534	84.1546	87.5504	65.6894	94.2112	103.873	71.8542	80.4428	85.5859	84.4771	910.202	8.23006	8.50948	9.24571	9.6188	7.21701	10.3506	11.412	7.89432	8.8379	9.40297	9.28114
1701	sp|Q08211|DHX9_HUMAN	DHX9	DHX9_HUMAN ATP-dependent RNA helicase A	132	EVGASGYGVPGPT	20.1669	U	K.AENNSEVGASGY#GVPGPTWDR.G	1	1	1	28.9625	70.201	52.7757	39.3652	29.9477	36.8125	33.653	36.4053	87.7948	85.5742	79.5858	581.078	74.6117	112.39	118.094	90.4529	110.547	99.3918	95.8683	86.5652	87.7948	90.1275	94.5594	1060.4	7.03617	10.5988	11.1367	8.53005	10.425	9.37302	9.04075	8.16343	8.27938	8.49936	8.91731
3141	sp|Q70E73|RAPH1_HUMAN	RAPH1	RAPH1_HUMAN Ras-associated and pleckstrin homology domains-containing protein 1	366	FKNPQNYLLGKKE	1000	R	K.NPQNY#LLGK.K	1	1	1	28.8519	30.1692	30.8406	45.3232	17.5506	32.5735	39.9248	57.0389	78.6848	63.9211	58.5174	483.396	74.3267	48.3001	69.0105	104.143	64.7853	87.9465	113.735	135.628	78.6848	67.3222	69.5271	913.409	8.13728	5.28789	7.55526	11.4016	7.09269	9.62838	12.4517	14.8486	8.61441	7.37043	7.61182
3309	sp|O14786|NRP1_HUMAN	NRP1	NRP1_HUMAN Neuropilin-1	920	LNTQSTYSEAxxx	24.437	R	K.LNTQSTY#SEA.-	1	1	1	28.2878	53.6506	33.9411	36.9663	17.8426	21.6451	23.0998	21.8948	86.6805	102.683	100.496	527.188	72.8734	85.8932	75.9484	84.9407	65.8631	58.4405	65.805	52.0619	86.6805	108.146	119.404	876.057	8.31834	9.80452	8.66934	9.6958	7.51812	6.67086	7.5115	5.94275	9.89438	12.3447	13.6297
450	sp|Q16625|OCLN_HUMAN	OCLN	OCLN_HUMAN Occludin	315	PSPPSDYVERVDS	48.8739	R	K.NVSAGTQDVPSPPSDY#VER.V	1	1	1	28.2061	57.544	23.2366	14.9841	10.7429	25.4649	18.0509	11.8391	67.5404	56.1795	33.8789	347.667	72.6629	92.1264	51.9953	34.4303	39.6557	68.7538	51.4221	28.1512	67.5404	59.1688	40.253	606.16	11.9874	15.1984	8.57782	5.68007	6.54212	11.3425	8.48326	4.64419	11.1423	9.76125	6.64066
3615	sp|O00186|STXB3_HUMAN	STXBP3	STXB3_HUMAN Syntaxin-binding protein 3	521	QKPRANYLEDRKN	1000	U	R.ANY#LEDR.K	1	1	1	27.6455	65.461	42.612	29.2447	16.4571	33.7945	25.4457	21.0515	85.5827	75.9382	62.002	485.235	71.219	104.801	95.3508	67.1981	60.7489	91.2432	72.4881	50.0566	85.5827	79.9787	73.6673	852.335	8.35575	12.2958	11.187	7.884	7.12735	10.7051	8.50465	5.87289	10.041	9.38349	8.643
3240	sp|O75116|ROCK2_HUMAN	ROCK2	ROCK2_HUMAN Rho-associated protein kinase 2	1318	IAPCKVYYDISTA	24.437	R	K.VY#YDISTAK.N	1	1	1	27.644	245.998	149.868	65.2412	22.4278	123.511	93.9283	80.1741	283.954	260.122	158.768	1511.64	71.2149	393.836	335.352	149.91	82.7887	333.474	267.577	190.64	283.954	273.963	188.64	2571.35	2.76956	15.3163	13.0419	5.83003	3.21966	12.9688	10.4061	7.41399	11.043	10.6544	7.33622
2431	sp|O43768-4|ENSA_HUMAN	ENSA	ENSA_HUMAN Isoform 4 of Alpha-endosulfine	43	LKAKYPSLGQKPG	14.966	R	K.YPS#LGQKPGGSDFLMK.R	0	1	1	27.3208	72.1412	54.2508	57.0644	24.7483	61.9952	54.8713	78.0167	216.593	251.306	139.134	1037.44	70.3823	115.496	121.394	131.122	91.3544	167.384	156.314	185.51	216.593	264.677	165.311	1685.54	4.17566	6.85218	7.20212	7.77923	5.4199	9.93057	9.27382	11.006	12.8501	15.7028	9.80761
1997	sp|P78310|CXAR_HUMAN	CXADR	CXAR_HUMAN Coxsackievirus and adenovirus receptor	318	GYSKTQYNQVPSE	48.8739	R	K.TQY#NQVPSEDFER.T	1	1	1	27.175	139.847	62.9184	56.9832	18.2012	39.5389	31.4096	47.3769	144.472	149.34	115.344	832.606	70.0068	223.892	140.789	130.935	67.1869	106.753	89.4774	112.654	144.472	157.286	137.046	1380.5	5.07113	16.2182	10.1985	9.48464	4.86686	7.73292	6.48153	8.16037	10.4652	11.3935	9.92726
1503	sp|Q14677-3|EPN4_HUMAN	CLINT1	EPN4_HUMAN Isoform 3 of Clathrin interactor 1	159	KKNKDKYVGVSSD	81.6917	R	K.Y#VGVSSDSVGGFR.Y	1	1	1	27.0415	72.5123	68.1965	106.686	23.3002	47.3787	43.148	79.28	160.036	202.324	220.086	1049.99	69.6628	116.09	152.6	245.142	86.0089	127.92	122.917	188.513	160.036	213.09	261.493	1743.47	3.99564	6.65856	8.75265	14.0605	4.93319	7.33707	7.05013	10.8125	9.17914	12.2221	14.9984
3026	sp|P61026|RAB10_HUMAN	RAB10	RAB10_HUMAN Ras-related protein Rab-10	6	xMAKKTYDLLFKL	17.0091	U	K.KTY#DLLFK.L	1	1	1	26.9992	34.0383	49.0108	85.1433	31.2963	48.2269	67.97	166.496	119.04	116.585	131.219	876.025	69.554	54.4944	109.669	195.641	115.525	130.21	193.628	395.899	119.04	122.788	155.907	1662.36	4.18406	3.27814	6.59721	11.7689	6.94948	7.83286	11.6478	23.8155	7.16091	7.38638	9.37869
1630	sp|Q8TE68|ES8L1_HUMAN	EPS8L1	ES8L1_HUMAN Epidermal growth factor receptor kinase substrate 8-like protein 1	526	PAGQEGYVPYNIL	45.026	R	K.VRDPAGQEGY#VPYNILTPYPGPR.L	1	2	2	26.9079	38.2012	39.6472	79.8609	28.1228	38.0157	46.0352	128.225	93.0061	96.3711	110.723	725.116	69.3188	61.1591	88.7166	183.503	103.811	102.64	131.142	304.896	93.0061	101.499	131.555	1371.25	5.05516	4.46011	6.46978	13.3822	7.57054	7.48518	9.56371	22.235	6.78259	7.40194	9.59379
1662	sp|Q03135|CAV1_HUMAN	CAV1	CAV1_HUMAN Caveolin-1	14	DSEGHLYTVPIRE	40.9939	U	K.YVDSEGHLY#TVPIR.E	1	1	1	26.8649	95.0594	71.4611	56.9583	16.1354	50.738	45.6126	52.6149	236.715	229.801	191.423	1073.38	69.2079	152.188	159.905	130.878	59.5611	136.99	129.938	125.109	236.715	242.028	227.438	1669.96	4.14429	9.11327	9.5754	7.83721	3.56663	8.20319	7.78092	7.49173	14.1749	14.4931	13.6194
1046	sp|Q96DM3|MIC1_HUMAN	C18orf8	MIC1_HUMAN Uncharacterized protein C18orf8	430	LDAEQSYAMAVEA	48.8739	R	K.YLDAEQSY#AMAVEAGQSR.S	1	1	1	26.4851	39.9195	28.6589	36.0001	22.3076	19.5123	31.2452	50.7725	97.0183	91.4593	87.1767	530.556	68.2295	63.9101	64.1287	82.7206	82.3448	52.6821	89.0093	120.728	97.0183	96.3258	103.578	920.676	7.41081	6.94165	6.9654	8.98477	8.94396	5.72211	9.66783	13.113	10.5377	10.4625	11.2503
2499	sp|Q02241|KIF23_HUMAN	KIF23	KIF23_HUMAN Kinesin-like protein KIF23	582	EKTTTIYEEDKRN	48.8739	R	K.TTTIY#EEDK.R	1	1	1	26.4281	49.1589	61.6652	69.8241	23.9722	58.7093	64.4947	85.0866	112.965	81.1893	74.0034	707.497	68.0827	78.7021	137.985	160.441	88.4896	158.512	183.728	202.321	112.965	85.5093	87.9268	1364.66	4.98898	5.76715	10.1113	11.7568	6.48436	11.6155	13.4633	14.8257	8.27784	6.26597	6.44312
1921	sp|Q08345-5|DDR1_HUMAN	DDR1	DDR1_HUMAN Isoform 4 of Epithelial discoidin domain-containing receptor 1	484	PREPPPYQEPRPR	1000	R	R.EPPPY#QEPRPR.G	1	2	1	26.3608	47.2651	23.9115	21.3877	12.2986	20.915	15.9542	15.885	41.6009	39.512	42.9036	307.994	67.9092	75.6701	53.5057	49.1443	45.3982	56.4692	45.4491	37.7716	41.6009	41.6144	50.9757	565.508	12.0085	13.3809	9.46152	8.69029	8.02785	9.98556	8.03686	6.67922	7.35637	7.35875	9.01414
2889	sp|Q9UBU9|NXF1_HUMAN	NXF1	NXF1_HUMAN Nuclear RNA export factor 1	75	RVRYNPYTTRPNR	17.0091	R	R.YNPY#TTRPNR.R	1	1	1	26.0782	44.392	33.6287	29.548	22.3317	19.7318	20.1293	22.1112	65.1734	60.295	56.6777	400.097	67.1812	71.0704	75.2494	67.895	82.434	53.2749	57.343	52.5765	65.1734	63.5032	67.3413	723.042	9.29146	9.82936	10.4073	9.39019	11.401	7.36815	7.93079	7.27156	9.01377	8.78279	9.31361
1133	sp|Q96A22|CK052_HUMAN	C11orf52	CK052_HUMAN Uncharacterized protein C11orf52	103	LENATEYATLRFP	20.1669	U	K.HVHLENATEY#ATLR.F	1	2	1	25.9976	75.3942	55.2973	16.7283	8.65961	28.5824	21.3136	10.9483	96.0948	66.3219	21.2544	426.592	66.9735	120.704	123.736	38.438	31.9656	77.171	60.7168	26.033	96.0948	69.8509	25.2533	736.937	9.08809	16.3792	16.7906	5.21591	4.33762	10.4719	8.23908	3.53259	13.0398	9.47854	3.4268
3156	sp|Q9UBC2-2|EP15R_HUMAN	EPS15L1	EP15R_HUMAN Isoform 2 of Epidermal growth factor receptor substrate 15-like 1	229	VPVLPASPPPKDS	100.687	R	K.TVFPGAVPVLPAS#PPPK.D	0	1	1	25.9101	31.2709	36.4226	43.3126	23.5201	32.8821	33.7441	33.8472	54.4176	47.4709	76.5598	439.358	66.7481	50.0639	81.501	99.5233	86.8208	88.7798	96.1278	80.4827	54.4176	49.9968	90.9641	845.426	7.89521	5.92174	9.64023	11.772	10.2695	10.5012	11.3703	9.51978	6.43671	5.9138	10.7596
1509	sp|Q9NW82|WDR70_HUMAN	WDR70	WDR70_HUMAN WD repeat-containing protein 70	618	AAEDSPYWVSPAY	30.8348	U	K.AAEDSPY#WVSPAYSK.T	1	2	2	25.8716	127.012	70.7818	96.6766	19.5694	42.4333	40.1059	52.7351	206.986	307.171	376.221	1365.56	66.649	203.343	158.385	222.142	72.2373	114.567	114.251	125.395	206.986	323.516	447.004	2054.48	3.24409	9.89757	7.70927	10.8126	3.51609	5.57648	5.56108	6.10348	10.0749	15.7469	21.7576
926	sp|P16144|ITB4_HUMAN	ITGB4	ITB4_HUMAN Integrin beta-4	1474	AYGTHLSPHVPHR	23.6238	R	R.M*TTTSAAAYGTHLS#PHVPHR.V	0	1	1	25.7531	31.0704	23.6803	17.4298	12.771	20.0885	19.1291	22.0144	57.1439	44.1261	51.805	325.012	66.3437	49.743	52.9882	40.05	47.1419	54.2377	54.4936	52.3464	57.1439	46.474	61.5518	582.514	11.3892	8.53936	9.09647	6.87536	8.09284	9.31097	9.3549	8.98629	9.80988	7.97817	10.5666
0	sp|Q9BYM8|HOIL1_HUMAN	RBCK1	HOIL1_HUMAN RanBP-type and C3HC4-type zinc finger-containing protein 1	262	QQQEGNYLQHVQL	1000	R	K.QQQQEGNY#LQHVQLDQR.S	1	1	1	25.5437	46.1805	30.5623	24.7687	17.4183	21.3524	21.382	22.1143	77.4038	82.1696	61.2776	430.173	65.8043	73.9338	68.3878	56.9132	64.2969	57.6502	60.9115	52.5837	77.4038	86.5417	72.8066	737.233	8.92584	10.0285	9.27628	7.71983	8.72137	7.8198	8.26218	7.13257	10.4992	11.7387	9.87565
2580	sp|A1X283|SPD2B_HUMAN	SH3PXD2B	SPD2B_HUMAN SH3 and PX domain-containing protein 2B	226	PEEEEKYTVIYPY	24.437	R	K.Y#TVIYPYTAR.D	1	1	1	25.4069	28.5618	43.1833	66.7514	24.9849	49.2224	56.0671	126.723	124.217	105.294	121.458	771.87	65.4518	45.7267	96.6291	153.381	92.2276	132.898	159.72	301.325	124.217	110.897	144.31	1426.78	4.58737	3.20488	6.77252	10.7501	6.46403	9.31451	11.1944	21.1192	8.7061	7.7725	10.1144
8	sp|P68363|TBA1B_HUMAN	TUBA1B	TBA1B_HUMAN Tubulin alpha-1B chain	282	ISAEKAYHEQLSV	40.3622	R	K.AY#HEQLSVAEITNACFEPANQMVK.C	1	4	3	25.3909	303.737	158.98	223.616	29.8996	121.558	108.56	149.73	366.246	474.437	569.887	2532.04	65.4106	486.276	355.743	513.823	110.37	328.201	309.259	356.032	366.246	499.681	677.108	4068.15	1.60787	11.9532	8.74459	12.6304	2.71302	8.06757	7.60197	8.7517	9.00277	12.2828	16.6441
3135	sp|Q9HC35|EMAL4_HUMAN	EML4	EMAL4_HUMAN Echinoderm microtubule-associated protein-like 4	226	INQEGEYIKMFMR	1000	R	K.DVIINQEGEY#IK.M	1	1	1	25.2143	28.0363	19.7658	27.0329	16.6601	19.8152	18.6369	21.5785	38.1445	35.3059	30.4497	280.64	64.9558	44.8854	44.229	62.1159	61.4982	53.4999	53.0917	51.3099	38.1445	37.1845	36.1786	547.093	11.8729	8.20434	8.08437	11.3538	11.2409	9.77893	9.70432	9.37863	6.97222	6.79673	6.61288
2669	sp|Q9UPY5|XCT_HUMAN	SLC7A11	XCT_HUMAN Cystine/glutamate transporter	15	TISKGGYLQGNVN	1000	U	K.GGY#LQGNVNGR.L	1	1	1	24.8183	39.5972	21.6062	33.5464	12.3997	15.2605	16.9788	33.1371	49.9577	52.7614	51.0189	351.082	63.9355	63.3941	48.3473	77.0826	45.7715	41.2025	48.368	78.794	49.9577	55.5688	60.6178	633.04	10.0998	10.0142	7.63732	12.1766	7.23043	6.50868	7.64059	12.4469	7.89171	8.77808	9.57567
503	sp|Q96AE4-2|FUBP1_HUMAN	FUBP1	FUBP1_HUMAN Isoform 2 of Far upstream element-binding protein 1	58	SLNSNDYGYGGQK	31.2747	R	K.IGGDAGTSLNSNDY#GYGGQK.R	1	1	1	24.2175	99.1517	48.2932	62.0422	19.9245	47.9956	25.1724	34.3404	74.905	124.27	127.734	688.047	62.3877	158.739	108.063	142.56	73.5482	129.585	71.7093	81.6552	74.905	130.882	151.766	1185.8	5.26122	13.3867	9.11311	12.0222	6.2024	10.9281	6.04733	6.88608	6.31682	11.0375	12.7986
3319	sp|Q9Y217|MTMR6_HUMAN	MTMR6	MTMR6_HUMAN Myotubularin-related protein 6	598	DNRYSEYAEEFSK	30.8348	U	R.YSEY#AEEFSK.S	1	1	1	23.9665	57.5083	31.6221	37.4284	19.3474	28.8122	23.9447	31.8294	116.347	147.719	255.996	774.521	61.7412	92.0693	70.7593	86.0026	71.4177	77.7913	68.2119	75.6845	116.347	155.579	304.161	1179.76	5.23335	7.80404	5.99775	7.28981	6.05356	6.5938	5.78183	6.41523	9.86188	13.1873	25.7815
823	sp|P35637|FUS_HUMAN	FUS	FUS_HUMAN RNA-binding protein FUS	468	SHMGGNYGDDRRG	27.1301	R	K.APKPDGPGGGPGGSHM*GGNY#GDDR.R	1	2	2	23.9318	266.469	95.5804	139.622	13.0945	62.9625	50.0431	45.7376	184.7	312.964	378.045	1573.15	61.6517	426.609	213.876	320.822	48.3363	169.995	142.559	108.756	184.7	329.616	449.172	2456.09	2.51015	17.3694	8.70796	13.0623	1.96802	6.92137	5.80431	4.428	7.52008	13.4204	18.288
544	sp|P52594-4|AGFG1_HUMAN	AGFG1	AGFG1_HUMAN Isoform 4 of Arf-GAP domain and FG repeat-containing protein 1	336	LQTADKYAALANL	121.092	R	K.Y#AALANLDNIFSAGQGGDQGSGFGTTGK.A	1	3	1	23.9176	41.0507	31.6181	27.9873	16.1769	19.8293	16.6199	19.5711	77.9656	99.2954	62.6407	436.673	61.6152	65.7212	70.7504	64.3088	59.7143	53.5381	47.3456	46.5366	77.9656	104.579	74.4262	726.501	8.48109	9.04626	9.73852	8.85185	8.21944	7.36931	6.51694	6.40558	10.7317	14.3949	10.2445
535	sp|Q6ZVM7|TM1L2_HUMAN	TOM1L2	TM1L2_HUMAN TOM1-like protein 2	404	QRKTVTYEDPQAV	19.8431	R	K.TVTY#EDPQAVGGLASALDNRK.Q	1	1	1	23.8307	302.141	180.86	123.492	20.6812	161.978	137.011	198.305	505.909	709.512	396.866	2760.58	61.3914	483.72	404.702	283.757	76.3413	437.331	390.309	471.534	505.909	747.264	471.534	4333.79	1.41657	11.1616	9.33828	6.54755	1.76154	10.0912	9.00617	10.8804	11.6736	17.2427	10.8804
1092	sp|Q9Y450|HBS1L_HUMAN	HBS1L	HBS1L_HUMAN HBS1-like protein	58	PVEEYDYEDLKES	20.1669	R	R.DKPSVEPVEEYDY#EDLK.E	1	1	1	23.7501	53.8464	29.4392	27.585	13.4297	20.848	24.1582	21.9494	182.994	192.74	154.193	744.933	61.1838	86.2067	65.8746	63.3844	49.5734	56.2884	68.8203	52.1916	182.994	202.995	183.204	1072.72	5.70363	8.0363	6.14092	5.90877	4.6213	5.24727	6.41551	4.86537	17.059	18.9235	17.0785
351	sp|P51991|ROA3_HUMAN	HNRNPA3	ROA3_HUMAN Heterogeneous nuclear ribonucleoprotein A3	358	GGRSSGSPYGGGY	17.0091	R	R.SSGS#PYGGGYGSGGGSGGYGSR.R	0	1	1	23.5976	30.0161	24.5245	24.3945	13.2456	20.7802	16.4346	13.8528	29.3068	19.0523	16.6013	231.806	60.791	48.0551	54.8772	56.0533	48.8941	56.1053	46.8177	32.9393	29.3068	20.0661	19.7248	473.631	12.8351	10.1461	11.5865	11.8348	10.3232	11.8458	9.88486	6.95465	6.18769	4.23666	4.16459
927	sp|P16144|ITB4_HUMAN	ITGB4	ITB4_HUMAN Integrin beta-4	1207	AQGEGPYSSLVSC	17.0091	R	K.VCAYGAQGEGPY#SSLVSCR.T	1	3	1	23.5755	29.3505	30.6256	30.0758	25.3356	30.08	28.484	38.8537	28.4136	23.7169	28.0727	316.584	60.7339	46.9894	68.5294	69.1078	93.5223	81.2143	81.1434	92.3872	28.4136	24.9788	33.3544	680.375	8.92654	6.90641	10.0723	10.1573	13.7457	11.9367	11.9263	13.5789	4.17618	3.67133	4.90236
1077	sp|Q9UKY7|CDV3_HUMAN	CDV3	CDV3_HUMAN Protein CDV3 homolog	244	LQLDNQYAVLENQ	1000	R	K.LQLDNQY#AVLENQK.S	1	2	2	23.4844	155.27	68.3998	84.0627	16.1095	34.5168	34.9657	44.0021	333.828	516.055	603.693	1914.39	60.4994	248.583	153.055	193.158	59.4657	93.1934	99.6079	104.629	333.828	543.514	717.274	2606.81	2.32082	9.53591	5.87136	7.40976	2.28117	3.575	3.82107	4.01369	12.806	20.8498	27.5154
3465	sp|Q8NHW5|RLA0L_HUMAN	RPLP0P6	RLA0L_HUMAN 60S acidic ribosomal protein P0-like	24	IQLLDDYPKCFIV	1000	R	K.IIQLLDDY#PK.C	1	2	1	22.8653	26.9691	19.8323	15.0337	19.7907	14.8518	14.6013	23.2536	27.6288	21.7025	25.0141	231.543	58.9043	43.1769	44.3778	34.5442	73.054	40.0992	41.5953	55.293	27.6288	22.8572	29.7204	471.251	12.4996	9.16218	9.41703	7.33032	15.5021	8.50909	8.82657	11.7332	5.86285	4.85033	6.3067
1261	sp|Q07912-3|ACK1_HUMAN	TNK2	ACK1_HUMAN Isoform 3 of Activated CDC42 kinase 1	938	VSSTHYYLLPERP	17.0091	R	K.VSSTHYY#LLPERPSYLER.Y	1	1	1	22.7289	62.4388	65.979	41.7093	19.7176	64.7485	63.3731	47.1546	89.9632	69.0366	41.6896	588.539	58.553	99.9629	147.638	95.8391	72.7842	174.817	180.533	112.125	89.9632	72.7099	49.5333	1154.46	5.07189	8.65885	12.7885	8.30164	6.30461	15.1428	15.6379	9.71235	7.79267	6.29818	4.29061
988	sp|Q68CZ2|TENS3_HUMAN	TNS3	TENS3_HUMAN Tensin-3	780	KLSLGQYDNDAGG	48.3154	R	K.LSLGQY#DNDAGGQLPFSK.C	1	2	1	22.596	42.0581	31.6111	21.1867	15.5219	34.0641	35.5957	52.9793	212.28	215.057	133.156	816.106	58.2106	67.3339	70.7347	48.6826	57.2965	91.9712	101.403	125.975	212.28	226.5	158.208	1218.6	4.77686	5.52553	5.80461	3.99498	4.70185	7.54731	8.32128	10.3377	17.4201	18.5869	12.9828
359	sp|O15126|SCAM1_HUMAN	SCAMP1	SCAM1_HUMAN Secretory carrier-associated membrane protein 1	73	TEEHPAYTQIAKE	19.8431	R	K.M*PNVPNTQPAIM*KPTEEHPAY#TQIAK.E	1	2	2	22.4938	68.7983	36.6785	59.0071	21.9871	27.1237	25.9996	42.1818	287.746	341.567	306.902	1240.49	57.9472	110.144	82.0737	135.586	81.1617	73.2325	74.066	100.301	287.746	359.742	364.644	1726.64	3.35606	6.3791	4.75337	7.85256	4.70055	4.24132	4.28959	5.809	16.665	20.8347	21.1187
1703	sp|Q99729-4|ROAA_HUMAN	HNRNPAB	ROAA_HUMAN Isoform 4 of Heterogeneous nuclear ribonucleoprotein A/B	270	GQGSTNYGKSQRR	48.8739	R	R.GSGGGGGGGGQGSTNY#GK.S	1	2	1	22.3755	137.222	87.737	77.9244	17.9689	64.4266	46.4955	70.0837	97.3497	150.486	153.185	925.255	57.6424	219.69	196.325	179.054	66.3294	173.948	132.453	166.646	97.3497	158.494	182.006	1629.94	3.53648	13.4784	12.0449	10.9853	4.06945	10.6721	8.12629	10.2241	5.9726	9.7239	11.1664
959	sp|Q9NUE0|ZDH18_HUMAN	ZDHHC18	ZDH18_HUMAN Palmitoyltransferase ZDHHC18	6	xMKDCEYQQISPG	47.0452	U	K.DCEY#QQISPGAAPLPASPGAR.R	1	2	1	22.3011	32.1493	23.8482	29.7164	19.1366	29.1234	23.3931	33.266	54.8052	59.2724	52.7369	379.749	57.4508	51.4702	53.3639	68.2821	70.6396	78.6315	66.6407	79.1007	54.8052	62.4263	62.659	705.47	8.14362	7.29587	7.56431	9.67895	10.0131	11.146	9.44629	11.2125	7.76861	8.84889	8.88189
1724	sp|O00193|SMAP_HUMAN	SMAP	SMAP_HUMAN Small acidic protein	84	EELESQYQQSMDS	44.2778	R	K.INEELESQY#QQSM*DSK.L	1	1	1	21.8761	37.6023	22.0068	22.2023	13.6888	17.4013	23.1411	23.95	57.9559	63.7907	70.487	374.102	56.356	60.2003	49.2437	51.0163	50.5301	46.9825	65.9228	56.9489	57.9559	67.1849	83.7487	646.09	8.72263	9.31763	7.6218	7.89615	7.8209	7.27182	10.2033	8.81438	8.97025	10.3987	12.9624
549	sp|Q9HBL0|TENS1_HUMAN	TNS1	TENS1_HUMAN Tensin-1	1440	LPDFSKYSMPDNS	24.437	R	K.Y#SM*PDNSPETR.A	1	2	1	21.8135	35.2686	21.0779	12.8939	17.3575	28.5677	21.8059	17.3327	49.8148	43.1012	22.2877	291.321	56.1948	56.4641	47.165	29.6275	64.0723	77.1311	62.1193	41.214	49.8148	45.3945	26.481	555.678	10.1128	10.1613	8.48782	5.33177	11.5305	13.8805	11.179	7.41688	8.96468	8.16921	4.76552
390	sp|P00533|EGFR_HUMAN	EGFR	EGFR_HUMAN Epidermal growth factor receptor	1138	AVGNPEYLNTVQP	13.3795	R	R.DPHYQDPHSTAVGNPEY#LNTVQPTCVNSTFDSPAHWAQK.G	1	1	1	21.7419	154.304	101.369	176.618	19.3074	91.8339	66.9037	102.231	230.246	348.725	365.837	1679.11	56.0104	247.036	226.828	405.831	71.2702	247.947	190.591	243.086	230.246	367.28	434.667	2720.79	2.05861	9.07957	8.33683	14.9159	2.61947	9.11303	7.00498	8.93438	8.46245	13.499	15.9757
3669	sp|Q8ND30|LIPB2_HUMAN	PPFIBP2	LIPB2_HUMAN Liprin-beta-2	422	FLAEHKYPTLPGK	17.0091	R	K.Y#PTLPGK.L	1	1	1	21.6085	354.833	261.72	141.73	30.0978	265.138	231.782	227.382	441.003	432.68	194.04	2602.01	55.6666	568.078	585.638	325.666	111.101	715.857	660.285	540.674	441.003	455.702	230.548	4690.22	1.18687	12.112	12.4864	6.94352	2.36879	15.2628	14.0779	11.5277	9.40261	9.71601	4.9155
2667	sp|A7KAX9|RHG32_HUMAN	ARHGAP32	RHG32_HUMAN Rho GTPase-activating protein 32	621	IVTENKYIEVGEG	1000	R	K.Y#IEVGEGPAALQGK.F	1	1	1	21.5598	47.4962	31.8141	22.5504	9.70553	21.332	14.2656	14.3766	62.6216	56.6926	41.7812	344.196	55.5411	76.0402	71.1888	51.816	35.8264	57.5953	40.6388	34.1851	62.6216	59.7092	49.6421	594.805	9.33771	12.7841	11.9684	8.71143	6.02322	9.68306	6.8323	5.74728	10.5281	10.0385	8.34596
550	sp|Q9HBL0|TENS1_HUMAN	TNS1	TENS1_HUMAN Tensin-1	1326	HVAYGGYSTPEDR	17.0091	R	R.HVAYGGY#STPEDR.R	1	1	1	21.5379	46.5537	31.6648	16.2775	16.3491	22.8383	22.3659	23.8734	56.6976	52.0534	49.1945	359.406	55.4849	74.5312	70.8548	37.4022	60.3502	61.6621	63.7146	56.7667	56.6976	54.8231	58.4502	650.738	8.52646	11.4533	10.8884	5.74767	9.27413	9.47573	9.79113	8.72344	8.71282	8.42476	8.98214
804	sp|Q96C90|PP14B_HUMAN	PPP1R14B	PP14B_HUMAN Protein phosphatase 1 regulatory subunit 14B	29	GPGPRVYFQSPPG	26.9265	U	R.VY#FQSPPGAAGEGPGGADDEGPVRR.Q	1	1	1	21.3798	48.0372	35.974	38.6565	19.6854	23.7627	23.4726	29.0807	64.3812	64.3871	64.4933	433.31	55.0775	76.9063	80.4973	88.8245	72.6656	64.1579	66.8671	69.1486	64.3812	67.8131	76.6273	782.966	7.03447	9.82242	10.2811	11.3446	9.28081	8.19421	8.54022	8.83161	8.22272	8.66105	9.7868
788	sp|P50402|EMD_HUMAN	EMD	EMD_HUMAN Emerin	105	YFTTRTYGEPESA	24.437	R	R.TY#GEPESAGPSR.A	1	1	1	21.3525	34.3616	27.6028	23.1759	12.0701	19.6935	18.155	23.3329	25.4848	50.2421	52.0837	307.555	55.0071	55.0119	61.7654	53.2533	44.5549	53.1714	51.7187	55.4815	25.4848	52.9155	61.883	570.247	9.64618	9.64703	10.8313	9.33862	7.81326	9.32426	9.06952	9.72938	4.46908	9.27938	10.852
2870	sp|Q93008|USP9X_HUMAN	USP9X	USP9X_HUMAN Probable ubiquitin carboxyl-terminal hydrolase FAF-X	2556	QRAQENYEGSEEV	23.6238	R	R.AQENY#EGSEEVSPPQTK.D	1	1	1	21.3089	32.4245	20.1033	19.8446	13.337	16.8049	14.7727	17.2518	42.3114	34.9886	34.8519	268	54.8948	51.9108	44.9842	45.5987	49.2312	45.3724	42.0833	41.0217	42.3114	36.8503	41.4091	495.668	11.0749	10.4729	9.07547	9.19945	9.9323	9.15378	8.49023	8.27604	8.53624	7.43448	8.35419
2483	sp|Q07157|ZO1_HUMAN	TJP1	ZO1_HUMAN Tight junction protein ZO-1	1066	RYESSSYTDQFSR	24.437	R	R.YESSSY#TDQFSR.N	1	1	1	20.9892	67.1219	30.8777	25.4606	11.1392	22.9032	22.563	17.9919	95.7146	87.6913	64.8347	467.287	54.0712	107.46	69.0935	58.503	41.1185	61.8374	64.2758	42.7816	95.7146	92.3573	77.033	764.246	7.0751	14.061	9.04074	7.65499	5.38027	8.0913	8.41035	5.59788	12.5241	12.0847	10.0796
2264	sp|Q7Z698|SPRE2_HUMAN	SPRED2	SPRE2_HUMAN Sprouty-related, EVH1 domain-containing protein 2	251	EDADSSYVRFAKG	24.437	R	K.YPDPSEDADSSY#VR.F	1	1	1	20.9834	150.748	61.7314	42.3447	10.9335	47.6316	34.4118	37.6386	194.102	204.379	173.544	978.448	54.0562	241.344	138.133	97.299	40.3594	128.603	98.0301	89.4977	194.102	215.254	206.196	1502.87	3.59686	16.0588	9.19129	6.4742	2.68548	8.55712	6.52285	5.95511	12.9154	14.3228	13.7201
2911	sp|P35579|MYH9_HUMAN	MYH9	MYH9_HUMAN Myosin-9	193	VIQYLAYVASSHK	45.026	R	K.VIQYLAY#VASSHK.S	1	1	1	20.7979	18.7851	14.3034	15.27	14.22	16.4151	15.3349	15.6942	26.784	26.0068	25.3085	208.92	53.5784	30.0744	32.0061	35.0872	52.4909	44.3199	43.6851	37.318	26.784	27.3905	30.0701	412.805	12.9791	7.28539	7.75334	8.4997	12.7157	10.7363	10.5825	9.04012	6.48829	6.63523	7.28435
3424	sp|Q13671|RIN1_HUMAN	RIN1	RIN1_HUMAN Ras and Rab interactor 1	681	LYKEQGYHRLPPG	1000	R	K.EQGY#HRLPPGALAHR.L	1	1	1	20.5549	24.0455	21.811	19.5298	15.4014	17.9191	14.8683	13.7733	29.7077	30.6193	27.9256	236.156	52.9524	38.4962	48.8056	44.8754	56.8519	48.3806	42.3558	32.7503	29.7077	32.2485	33.1796	460.604	11.4963	8.35777	10.596	9.74273	12.3429	10.5037	9.19571	7.11031	6.44973	7.00135	7.20351
631	sp|Q99569|PKP4_HUMAN	PKP4	PKP4_HUMAN Plakophilin-4	482	ATYAEPYRPIQYR	36.5564	R	R.NNYALNTTATYAEPY#RPIQYR.V	1	1	1	20.5058	36.1882	28.5282	18.2362	6.20932	13.1281	11.8227	15.3076	58.5744	46.7519	28.2856	283.538	52.8259	57.9363	63.8362	41.9028	22.9207	35.4451	33.6798	36.3987	58.5744	49.2395	33.6074	486.367	10.8613	11.9121	13.1251	8.61548	4.71264	7.28772	6.92478	7.48379	12.0433	10.1239	6.90989
1476	sp|Q9Y490|TLN1_HUMAN	TLN1	TLN1_HUMAN Talin-1	127	ITNHDEYSLVREL	24.437	R	R.IGITNHDEY#SLVR.E	1	1	1	20.4007	24.9873	18.6488	42.4951	19.0938	38.3844	35.0277	74.0707	85.6489	86.6569	89.6018	535.016	52.5553	40.0041	41.7295	97.6447	70.4818	103.636	99.7844	176.127	85.6489	91.2678	106.46	965.339	5.44423	4.14405	4.32279	10.1151	7.30125	10.7357	10.3367	18.2451	8.87242	9.45449	11.0282
3043	sp|O43491|E41L2_HUMAN	EPB41L2	E41L2_HUMAN Band 4.1-like protein 2	88	LKKQKSYTLVVAK	24.437	R	K.SY#TLVVAK.D	1	1	1	20.387	278.334	131.198	89.7762	14.7152	108.966	72.2058	78.8691	469.9	532.011	425.879	2222.24	52.5198	445.605	293.575	206.287	54.3189	294.203	205.695	187.537	469.9	560.318	506.005	3275.96	1.60318	13.6023	8.9615	6.29697	1.6581	8.98065	6.27892	5.72462	14.3439	17.1039	15.446
3697	sp|P42226|STAT6_HUMAN	STAT6	STAT6_HUMAN Signal transducer and activator of transcription 6	641	GKDGRGYVPATIK	76.7327	R	R.GY#VPATIK.M	1	1	1	19.7495	210.42	180.731	108.079	25.2797	139.163	151.919	192.49	616.009	616.66	283.33	2543.83	50.8775	336.877	404.412	248.343	93.3159	375.732	432.778	457.705	616.009	649.472	336.637	4002.16	1.27125	8.41737	10.1049	6.20522	2.33164	9.38824	10.8136	11.4365	15.3919	16.228	8.41139
2239	sp|Q14980|NUMA1_HUMAN	NUMA1	NUMA1_HUMAN Nuclear mitotic apparatus protein 1	169	TFPEELSPPSHQA	51.0043	R	K.APVPSTCSSTFPEELS#PPSHQAK.R	0	1	1	19.4504	24.2534	26.764	30.0213	15.8127	23.3498	23.2506	26.4843	28.5428	27.1657	29.2398	274.335	50.107	38.829	59.8886	68.9826	58.3701	63.0431	66.2349	62.9748	28.5428	28.6111	34.7411	560.325	8.94249	6.92973	10.6882	12.3112	10.4172	11.2512	11.8208	11.239	5.09398	5.10616	6.20017
3728	sp|O95238|SPDEF_HUMAN	SPDEF	SPDEF_HUMAN SAM pointed domain-containing Ets transcription factor	329	ISQRLVYQFVHPI	1000	R	R.LVY#QFVHPI.-	1	1	1	19.3939	26.7306	30.6448	35.5005	17.9152	21.7735	22.2231	40.0779	37.5935	38.0553	40.6817	330.59	49.9616	42.795	68.5725	81.5727	66.1312	58.7873	63.3077	95.298	37.5935	40.0802	48.3357	652.435	7.65771	6.55926	10.5102	12.5028	10.1361	9.01044	9.70329	14.6065	5.76204	6.14317	7.4085
764	sp|Q9H706|GAREM_HUMAN	GAREM	GAREM_HUMAN GRB2-associated and regulator of MAPK protein	453	GKSELPYEELWLE	54.7552	R	K.SELPY#EELWLEEGKPSHQPLTR.S	1	2	2	19.1111	127.576	112.834	129.321	19.4431	88.8254	74.065	87.9806	235.523	243.69	161.374	1299.74	49.233	204.246	252.482	297.151	71.7711	239.824	210.992	209.202	235.523	256.657	191.735	2218.82	2.21889	9.20519	11.3791	13.3923	3.23466	10.8086	9.50919	9.42855	10.6148	11.5673	8.64133
3188	sp|P62820|RAB1A_HUMAN	RAB1A	RAB1A_HUMAN Ras-related protein Rab-1A	112	LQEIDRYASENVN	48.8739	R	R.Y#ASENVNK.L	1	1	1	19.0848	36.2309	23.697	60.3313	21.5167	36.2457	58.1296	52.9008	211.816	110.074	460.882	1090.91	49.1653	58.0047	53.0257	138.628	79.4254	97.8615	165.596	125.788	211.816	115.931	547.594	1642.84	2.99271	3.53077	3.22769	8.43836	4.83465	5.95686	10.0799	7.65679	12.8933	7.05678	33.3322
520	sp|P16885|PLCG2_HUMAN	PLCG2	PLCG2_HUMAN 1-phosphatidylinositol 4,5-bisphosphate phosphodiesterase gamma-2	1245	ENQLQLYQEKCNK	113.176	U	K.EFSVNENQLQLY#QEK.C	1	1	1	19.0475	67.3322	50.2756	44.9848	13.8178	46.9211	35.6993	43.4158	153.021	147.017	105.74	727.273	49.0691	107.797	112.499	103.366	51.0061	126.684	101.698	103.235	153.021	154.84	125.634	1188.85	4.12745	9.06734	9.46288	8.69459	4.29037	10.656	8.55431	8.6836	12.8714	13.0243	10.5677
2245	sp|Q01804|OTUD4_HUMAN	OTUD4	OTUD4_HUMAN OTU domain-containing protein 4	438	TSRESNYFGLSPE	30.8348	R	R.ESNY#FGLSPEER.R	1	1	1	18.9948	93.7416	58.5776	80.4739	14.9319	35.0139	34.7404	58.8528	199.202	342.279	683.733	1620.54	48.9334	150.078	131.076	184.912	55.1187	94.5357	98.9662	139.941	199.202	360.491	812.373	2275.63	2.15032	6.595	5.76	8.12575	2.42213	4.15427	4.34896	6.14957	8.75373	15.8414	35.6989
1184	sp|O14828|SCAM3_HUMAN	SCAMP3	SCAM3_HUMAN Secretory carrier-associated membrane protein 3	53	REPPPAYEPPAPA	108.431	U	R.EPPPAY#EPPAPAPLPPPSAPSLQPSRK.L	1	2	2	18.9588	46.9989	35.1268	52.6936	15.8001	28.3112	31.2575	51.21	226.207	304.131	260.743	1071.44	48.8407	75.244	78.6015	121.079	58.3237	76.4388	89.0443	121.768	226.207	320.313	309.801	1525.66	3.20128	4.9319	5.15197	7.93614	3.82285	5.01021	5.83644	7.98134	14.8268	20.9951	20.306
1157	sp|P02786|TFR1_HUMAN	TFRC	TFR1_HUMAN Transferrin receptor protein 1	20	GGEPLSYTRFSLA	17.0091	R	R.SAFSNLFGGEPLSY#TR.F	1	1	1	18.9341	26.1322	16.2273	19.708	9.51008	14.1322	12.0563	15.4603	38.9905	37.718	31.6977	240.567	48.7769	41.837	36.3112	45.2848	35.1049	38.1562	34.3451	36.7618	38.9905	39.7249	37.6614	432.955	11.266	9.66314	8.38682	10.4595	8.10822	8.81298	7.93273	8.49091	9.00568	9.1753	8.69869
3684	sp|Q05084-2|ICA69_HUMAN	ICA1	ICA69_HUMAN Isoform 2 of Islet cell autoantigen 1	262	FKGYQPYEFTTLK	13.3795	R	K.GYQPY#EFTTLK.S	1	1	1	18.8662	48.9595	34.2089	40.3254	14.9661	33.5591	28.5805	44.416	132.331	127.827	89.8624	613.902	48.6022	78.3829	76.5476	92.6592	55.2449	90.6076	81.4181	105.613	132.331	134.628	106.769	1002.8	4.84663	7.81637	7.63335	9.24001	5.50904	9.03542	8.11904	10.5318	13.1961	13.4252	10.6471
1018	sp|O95208-2|EPN2_HUMAN	EPN2	EPN2_HUMAN Isoform 2 of Epsin-2	186	SHSEQEYGKAGGS	47.0452	R	R.GSSQPNLSTSHSEQEY#GK.A	1	2	2	18.8576	56.056	49.0529	83.4701	15.8982	56.7403	49.8803	86.1318	239.866	361.423	338.539	1355.92	48.58	89.7441	109.763	191.797	58.6856	153.196	142.096	204.806	239.866	380.654	402.233	2021.42	2.40326	4.43966	5.43001	9.48821	2.90318	7.57861	7.0295	10.1318	11.8662	18.831	19.8986
960	sp|Q8WXE0|CSKI2_HUMAN	CASKIN2	CSKI2_HUMAN Caskin-2	336	GTDRIGYFPPGIV	104.048	R	R.IGY#FPPGIVEVVSK.R	1	1	1	18.8353	69.9567	61.8565	39.1274	16.9853	60.5887	51.6809	49.1918	103.221	110.969	67.2657	649.679	48.5225	111.999	138.413	89.9063	62.6984	163.586	147.225	116.969	103.221	116.874	79.9213	1179.34	4.11439	9.49677	11.7365	7.62347	5.31642	13.871	12.4837	9.91823	8.75248	9.91014	6.77681
996	sp|Q9UQC2|GAB2_HUMAN	GAB2	GAB2_HUMAN GRB2-associated-binding protein 2	643	SDEKVDYVQVDKE	1000	R	K.VDY#VQVDK.E	1	2	2	18.2161	550.701	355.639	126.279	13.1801	66.783	56.5377	41.1019	790.414	530.771	210.842	2760.47	46.9273	881.658	795.798	290.163	48.6522	180.31	161.061	97.7328	790.414	559.013	250.51	4102.24	1.14394	21.4921	19.3991	7.07327	1.18599	4.39541	3.92617	2.38243	19.2679	13.627	6.10667
1446	sp|Q8WVJ2|NUDC2_HUMAN	NUDCD2	NUDC2_HUMAN NudC domain-containing protein 2	145	AEISGNYTKGGPD	17.0091	R	K.ENPGFDFSGAEISGNY#TK.G	1	1	1	18.1887	53.4882	27.6556	28.3863	8.59525	22.5375	16.3258	31.7493	100.903	116.175	130.588	554.593	46.8567	85.6332	61.8837	65.2256	31.728	60.85	46.5078	75.494	100.903	122.356	155.158	852.596	5.49576	10.0438	7.25827	7.65023	3.72134	7.13703	5.45484	8.85461	11.8348	14.351	18.1983
1102	sp|Q13480-2|GAB1_HUMAN	GAB1	GAB1_HUMAN Isoform 2 of GRB2-associated-binding protein 1	406	ASSQDCYDIPRAF	59.2977	R	K.DASSQDCY#DIPR.A	1	1	1	17.8746	82.1214	62.0357	110.625	23.044	78.6955	74.9459	107.963	242.908	176.463	139.057	1115.73	46.0477	131.474	138.814	254.193	85.0633	212.473	213.501	256.717	242.908	185.853	165.22	1932.26	2.38309	6.80415	7.18403	13.1552	4.40226	10.9961	11.0492	13.2858	12.5712	9.61838	8.5506
1485	sp|O14964|HGS_HUMAN	HGS	HGS_HUMAN Hepatocyte growth factor-regulated tyrosine kinase substrate	237	TELPPEYLTSPLS	20.1669	R	K.ATSTTELPPEY#LTSPLSQQSQLPPK.R	1	3	2	17.5811	49.0777	42.131	50.7608	16.2607	23.5986	29.8366	41.6505	176.725	213.336	209.81	870.768	45.2915	78.5721	94.2745	116.637	60.0239	63.7149	84.9966	99.0375	176.725	224.687	249.284	1293.25	3.50216	6.07558	7.28976	9.01897	4.64134	4.92674	6.57235	7.65806	13.6652	17.3739	19.2759
3035	sp|P23588|IF4B_HUMAN	EIF4B	IF4B_HUMAN Eukaryotic translation initiation factor 4B	211	TDSFDDYPPRRGD	58.5514	R	R.ARPATDSFDDY#PPRR.G	1	1	1	17.462	40.0053	35.5286	31.313	11.3553	26.8935	25.3117	22.339	83.5028	88.2582	63.7582	445.728	44.9848	64.0475	79.5007	71.9506	41.9164	72.611	72.1064	53.118	83.5028	92.9543	75.7539	752.446	5.97847	8.5119	10.5656	9.56222	5.57069	9.64999	9.58293	7.05938	11.0975	12.3536	10.0677
2509	sp|Q9P0K7-2|RAI14_HUMAN	RAI14	RAI14_HUMAN Isoform 2 of Ankycorbin	222	LVDSLGYNALHYS	15.0073	R	K.GADLNLVDSLGY#NALHYSK.L	1	1	1	17.2749	28.2025	18.1498	24.7645	14.7851	17.0388	19.1701	23.9385	50.516	48.2859	46.6069	308.733	44.5026	45.1514	40.613	56.9035	54.5768	46.0038	54.6104	56.9214	50.516	50.8551	55.3758	556.03	8.00363	8.12032	7.30411	10.2339	9.81545	8.27363	9.82149	10.2371	9.08512	9.14611	9.95914
2015	sp|Q13546|RIPK1_HUMAN	RIPK1	RIPK1_HUMAN Receptor-interacting serine/threonine-protein kinase 1	384	LQDEANYHLYGSR	53.5337	R	K.LQDEANY#HLYGSR.M	1	1	1	17.2216	47.3827	19.0807	21.4704	9.21301	17.111	13.5519	15.3983	67.0862	69.6424	77.6706	374.829	44.3654	75.8584	42.696	49.3344	34.0084	46.1988	38.6057	36.6143	67.0862	73.3479	92.2839	600.399	7.38931	12.6347	7.11126	8.21693	5.66429	7.69467	6.43	6.09832	11.1736	12.2165	15.3704
3343	sp|O95218|ZRAB2_HUMAN	ZRANB2	ZRAB2_HUMAN Zinc finger Ran-binding domain-containing protein 2	102	LEERTGYGGGFNE	48.8739	R	R.TGY#GGGFNER.E	1	1	1	17.1606	36.2445	29.7175	30.1036	15.2252	19.275	23.2708	24.5072	41.9793	40.7156	40.1443	318.344	44.2082	58.0265	66.4974	69.1717	56.2015	52.0414	66.2922	58.2737	41.9793	42.882	47.6973	603.271	7.32807	9.61865	11.0228	11.4661	9.31613	8.62653	10.9888	9.65962	6.95862	7.10825	7.90644
1451	sp|Q8N4S9|MALD2_HUMAN	MARVELD2	MALD2_HUMAN MARVEL domain-containing protein 2	137	NSCKDPYGGSEGT	24.2431	R	K.DPY#GGSEGTFSSR.K	1	1	1	17.1022	50.2793	19.1828	17.0441	7.88945	14.4663	8.02835	12.9815	36.1912	40.694	34.358	258.217	44.0578	80.4959	42.9244	39.1638	29.1226	39.0583	22.8706	30.8676	36.1912	42.8593	40.8223	448.434	9.82482	17.9504	9.57208	8.73346	6.4943	8.70994	5.10011	6.88343	8.07058	9.55755	9.1033
2405	sp|P30041|PRDX6_HUMAN	PRDX6	PRDX6_HUMAN Peroxiredoxin-6	89	SKDINAYNCEEPT	124.374	U	K.DINAY#NCEEPTEK.L	1	1	1	16.94	33.6922	37.1685	73.031	14.6083	39.3383	55.4553	83.5051	73.1889	78.1254	92.9453	597.998	43.6398	53.9403	83.1702	167.81	53.9241	106.211	157.977	198.56	73.1889	82.2824	110.432	1131.14	3.85805	4.76868	7.3528	14.8355	4.76725	9.38977	13.9663	17.554	6.47039	7.27431	9.76296
3544	sp|P53621-2|COPA_HUMAN	COPA	COPA_HUMAN Isoform 2 of Coatomer subunit alpha	588	VKGNNVYCLDREC	1000	R	K.GNNVY#CLDR.E	1	1	1	16.8035	31.9072	25.9031	21.49	14.1035	22.6621	19.5518	18.5988	44.7095	28.4956	36.245	280.47	43.2883	51.0826	57.9622	49.3794	52.0609	61.1863	55.6978	44.2246	44.7095	30.0118	43.0643	532.668	8.12669	9.58996	10.8815	9.27021	9.77362	11.4868	10.4564	8.30247	8.39351	5.63425	8.08464
1124	sp|Q8IY67-2|RAVR1_HUMAN	RAVER1	RAVR1_HUMAN Isoform 2 of Ribonucleoprotein PTB-binding 1	581	PPEPGLSDSYSFD	18.8054	R	R.LPPEPGLS#DSYSFDYPSDMGPR.R	0	1	1	16.6839	17.6705	17.0637	16.2238	12.923	10.3612	11.6358	14.1981	36.2103	33.1163	25.5945	211.681	42.9801	28.29	38.1827	37.2788	47.7032	27.9745	33.1472	33.7605	36.2103	34.8784	30.41	390.816	10.9975	7.2387	9.77001	9.5387	12.2061	7.15799	8.48155	8.63847	9.26532	8.92451	7.78115
951	sp|Q16181|SEPT7_HUMAN	2017-09-07	SEPT7_HUMAN Septin-7	319	KLAAVTYNGVDNN	24.437	R	K.LAAVTY#NGVDNNK.N	1	1	1	16.0798	75.5782	66.8585	42.1193	10.0941	43.0462	35.0978	28.3399	183.093	176.202	81.0218	757.53	41.4238	120.999	149.606	96.7811	37.2606	116.222	99.9843	67.3871	183.093	185.577	96.2656	1194.6	3.46759	10.1288	12.5235	8.10155	3.11909	9.72898	8.36969	5.64098	15.3267	15.5347	8.0584
3010	sp|Q8NF64|ZMIZ2_HUMAN	ZMIZ2	ZMIZ2_HUMAN Zinc finger MIZ domain-containing protein 2	103	GGANKGYVQQGVY	87.265	R	K.GY#VQQGVYSR.G	1	1	1	16.0058	45.0154	22.7632	25.5477	11.8768	18.2337	14.649	10.1188	50.1308	57.4385	70.5218	342.302	41.2333	72.0684	50.9362	58.7033	43.8413	49.2299	41.731	24.0608	50.1308	60.4947	83.7901	576.22	7.15582	12.5071	8.83972	10.1876	7.60844	8.54359	7.2422	4.17562	8.69995	10.4985	14.5413
1518	sp|Q8NHU3|SMS2_HUMAN	SGMS2	SMS2_HUMAN Phosphatidylcholine:ceramide cholinephosphotransferase 2	59	TKKYPDYIQIAMP	45.026	U	K.KYPDY#IQIAMPTESR.N	1	1	1	15.9461	27.6998	19.2089	17.7182	9.73175	12.9337	13.8166	16.7604	29.9978	27.8624	27.2048	218.88	41.0795	44.3466	42.9829	40.7127	35.9232	34.9202	39.3599	39.8531	29.9978	29.3449	32.3232	410.844	9.9988	10.794	10.4621	9.90954	8.74376	8.49962	9.58025	9.7003	7.30152	7.14259	7.86751
921	sp|P46940|IQGA1_HUMAN	IQGAP1	IQGA1_HUMAN Ras GTPase-activating-like protein IQGAP1	1117	KLPYDVTPEQALA	23.6238	R	K.LPYDVT#PEQALAHEEVK.T	0	1	1	15.8526	108.012	170.289	91.6676	12.3602	136.657	160.368	191.258	448.793	362.093	129.106	1826.46	40.8386	172.924	381.047	210.633	45.6258	368.967	456.845	454.777	448.793	381.359	153.397	3115.21	1.31094	5.55097	12.2318	6.76144	1.46461	11.8441	14.665	14.5986	14.4065	12.2419	4.92413
1610	sp|O75886|STAM2_HUMAN	STAM2	STAM2_HUMAN Signal transducing adapter molecule 2	374	APVYSVYSKLHPP	17.0091	U	K.LVNEAPVYSVY#SK.L	1	1	1	15.8291	119.63	83.3476	111.394	15.0139	37.537	54.5453	89.1914	700.284	726.794	587.603	2541.17	40.7781	191.525	186.503	255.96	55.4214	101.348	155.385	212.081	700.284	765.465	698.157	3362.91	1.21259	5.69521	5.54589	7.61127	1.64802	3.01369	4.62055	6.30648	20.8238	22.762	20.7605
998	sp|Q9UQC2|GAB2_HUMAN	GAB2	GAB2_HUMAN GRB2-associated-binding protein 2	476	DNSQSVYIPMSPG	24.2431	R	R.AGDNSQSVY#IPMSPGAHHFDSLGYPSTTLPVHR.G	1	2	2	15.802	54.4598	29.3598	34.7982	9.94541	48.0531	38.4272	45.521	73.7091	67.4367	64.4602	481.972	40.7083	87.1887	65.6971	79.9589	36.7119	129.741	109.469	108.241	73.7091	71.0249	76.588	879.037	4.63102	9.91866	7.47376	9.09619	4.17637	14.7594	12.4533	12.3136	8.38521	8.07986	8.71272
1186	sp|O14828|SCAM3_HUMAN	SCAMP3	SCAM3_HUMAN Secretory carrier-associated membrane protein 3	85	EPKNYGSYSTQAS	24.437	R	K.NYGS#YSTQASAAAATAELLK.K	0	1	1	15.6711	130.776	120.174	165.6	18.0566	80.0781	86.4126	144.64	807.381	803.273	507.227	2879.29	40.3712	209.369	268.907	380.514	66.653	216.206	246.166	343.927	807.381	846.014	602.659	4028.17	1.00222	5.19762	6.67566	9.44633	1.65467	5.36736	6.11112	8.53806	20.0434	21.0024	14.9611
1370	sp|Q01082|SPTB2_HUMAN	SPTBN1	SPTB2_HUMAN Spectrin beta chain, non-erythrocytic 1	2249	AASGIPYHSEVPV	27.1205	U	K.TAASGIPY#HSEVPVSLK.E	1	1	1	15.6501	33.0718	50.5641	117.42	18.3248	66.3632	116.576	296.874	219.741	194.784	162.382	1291.75	40.3169	52.947	113.145	269.807	67.6431	179.177	332.095	705.913	219.741	205.148	192.933	2378.87	1.69479	2.22573	4.75626	11.3418	2.8435	7.53203	13.9602	29.6744	9.23723	8.62378	8.11028
2936	sp|Q9UGK3-2|STAP2_HUMAN	STAP2	STAP2_HUMAN Isoform 2 of Signal-transducing adaptor protein 2	256	YEKVLGYVEADKE	1000	R	K.VLGY#VEADK.E	1	3	1	15.6478	116.349	71.7994	41.5609	8.18854	54.5263	56.165	49.7186	170.063	173.769	159.822	917.609	40.311	186.271	160.662	95.498	30.2267	147.218	159.999	118.222	170.063	183.015	189.891	1481.38	2.72119	12.5742	10.8455	6.44657	2.04045	9.93791	10.8007	7.98053	11.4801	12.3544	12.8186
646	sp|Q9NRF2|SH2B1_HUMAN	SH2B1	SH2B1_HUMAN SH2B adapter protein 1	55	LASHPQYAGPGAE	58.5514	R	R.LYLASHPQY#AGPGAEAAFSR.R	1	1	1	15.4804	33.0728	21.4757	19.1686	12.0981	17.8467	25.7776	17.4348	44.0718	40.6457	31.0461	278.118	39.8798	52.9487	48.0551	44.0453	44.6582	48.1851	73.4335	41.4567	44.0718	42.8085	36.8872	516.43	7.72221	10.2528	9.30526	8.5288	8.64748	9.33042	14.2195	8.02756	8.53393	8.28931	7.14274
2764	sp|Q92974|ARHG2_HUMAN	ARHGEF2	ARHG2_HUMAN Rho guanine nucleotide exchange factor 2	125	RPSSAIYPSDSFR	20.1669	R	R.ERPSSAIY#PSDSFR.Q	1	1	1	15.2323	40.8313	26.778	34.2084	15.0513	20.1674	19.6914	25.1682	105.864	101.044	75.5327	479.57	39.2406	65.3698	59.9199	78.6037	55.5595	54.451	56.0956	59.8456	105.864	106.421	89.7437	771.114	5.08881	8.47732	7.77056	10.1935	7.20509	7.06134	7.27461	7.76092	13.7288	13.8009	11.6382
2776	sp|P13929|ENOB_HUMAN	ENO3	ENOB_HUMAN Beta-enolase	44	GASTGIYEALELR	57.7111	R	R.AAVPSGASTGIY#EALELR.D	1	2	1	15.107	23.1522	18.5567	16.834	15.5519	19.1588	15.335	19.6142	37.1448	31.4578	87.1163	299.029	38.9179	37.066	41.5233	38.6809	57.4073	51.7277	43.6853	46.639	37.1448	33.1316	103.507	529.431	7.35091	7.00111	7.84302	7.30614	10.8432	9.77044	8.25138	8.80927	7.01598	6.25797	19.5506
1520	sp|O00560|SDCB1_HUMAN	SDCBP	SDCB1_HUMAN Syntenin-1	46	PHDGNLYPRLYPE	15.5899	R	K.VIQAQTAFSANPANPAILSEASAPIPHDGNLY#PR.L	1	1	1	15.0584	30.4973	33.8885	34.5814	24.4965	22.9239	31.8267	41.3795	52.9754	47.9785	40.9647	376.571	38.7926	48.8254	75.8307	79.4607	90.425	61.8932	90.6659	98.3931	52.9754	50.5314	48.672	736.465	5.2674	6.6297	10.2966	10.7895	12.2782	8.40408	12.3109	13.3602	7.1932	6.86134	6.60887
2048	sp|Q15642|CIP4_HUMAN	TRIP10	CIP4_HUMAN Cdc42-interacting protein 4	590	KEGGEGYVPTSYL	24.2431	R	K.EGGEGY#VPTSYLR.V	1	1	1	14.8252	31.5763	50.0874	37.7443	8.86277	39.9056	44.525	43.5189	76.7044	101.527	63.3274	512.605	38.192	50.5529	112.078	86.7284	32.7155	107.743	126.84	103.48	76.7044	106.929	75.2421	917.206	4.16395	5.51162	12.2195	9.45572	3.56687	11.7469	13.8289	11.2821	8.36284	11.6582	8.2034
2322	sp|O00192|ARVC_HUMAN	ARVCF	ARVC_HUMAN Armadillo repeat protein deleted in velo-cardio-facial syndrome	259	RFQAEPYGLEDDT	87.265	R	R.FQAEPY#GLEDDTR.S	1	2	1	14.7429	56.0498	24.9503	26.62	14.0112	25.192	15.3413	17.2832	104.506	90.7338	82.617	472.048	37.9799	89.7343	55.8301	61.1672	51.7199	68.0169	43.7034	41.0964	104.506	95.5616	98.1609	747.477	5.08108	12.005	7.46915	8.18315	6.91927	9.09953	5.84678	5.49801	13.9812	12.7846	13.1323
1981	sp|Q14847-2|LASP1_HUMAN	LASP1	LASP1_HUMAN Isoform 2 of LIM and SH3 domain protein 1	186	AQSYGGYKEPAAP	40.9777	R	R.RPLEQQQPHHIPTSAPVYQQPQQQPVAQSYGGY#K.E	1	2	1	14.429	38.5026	17.8325	23.1067	11.1514	14.2185	13.7814	11.8216	52.1451	62.9044	61.4785	321.372	37.1713	61.6417	39.903	53.0943	41.1637	38.3891	39.2596	28.1096	52.1451	66.2515	73.0453	530.174	7.01115	11.6267	7.52639	10.0145	7.76419	7.24085	7.40504	5.30195	9.83546	12.4962	13.7776
920	sp|P46940|IQGA1_HUMAN	IQGAP1	IQGA1_HUMAN Ras GTPase-activating-like protein IQGAP1	1114	EASKLPYDVTPEQ	28.9337	R	K.SWVNQMESQTGEASKLPY#DVTPEQALAHEEVK.T	1	2	2	14.3729	39.7609	47.6941	37.9932	13.7931	40.8015	45.1368	59.6447	123.91	159.23	70.1017	652.438	37.0267	63.6561	106.723	87.3002	50.9152	110.162	128.583	141.824	123.91	167.702	83.291	1101.09	3.36272	5.78118	9.69245	7.92851	4.62406	10.0048	11.6777	12.8803	11.2533	15.2305	7.5644
3254	sp|P62993|GRB2_HUMAN	GRB2	GRB2_HUMAN Growth factor receptor-bound protein 2	209	GMFPRNYVTPVNR	30.8348	R	R.NY#VTPVNR.N	1	1	1	14.0969	141.872	146.115	80.2728	11.938	142.61	118.34	122.845	275.019	246.859	97.95	1397.92	36.3157	227.134	326.954	184.45	44.0673	385.038	337.119	292.102	275.019	259.994	116.379	2484.57	1.46165	9.14177	13.1594	7.42381	1.77364	15.4972	13.5685	11.7566	11.0691	10.4643	4.68406
429	sp|Q92841|DDX17_HUMAN	DDX17	DDX17_HUMAN Probable ATP-dependent RNA helicase DDX17	580	NNPNLMYQDECDR	163.897	R	R.TTSSANNPNLMY#QDECDRR.L	1	6	2	14.0081	85.185	32.3041	55.0675	8.01757	20.1202	16.4328	16.9591	83.5184	128.396	101.544	561.554	36.087	136.379	72.2854	126.533	29.5956	54.3235	46.8126	40.3258	83.5184	135.228	120.649	881.738	4.09271	15.4671	8.19806	14.3505	3.3565	6.16095	5.30913	4.57344	9.47201	15.3366	13.6831
681	sp|Q8IVH8-3|M4K3_HUMAN	MAP4K3	M4K3_HUMAN Isoform 3 of Mitogen-activated protein kinase kinase kinase kinase 3	366	QGHQGGYFLGANK	41.4293	R	K.ETEPHHELDLQLEYGQGHQGGY#FLGANK.S	1	1	1	13.9861	68.8736	28.7384	32.6277	13.9016	25.2872	27.4555	29.3762	109.12	114.316	99.0209	562.704	36.0303	110.265	64.3066	74.9714	51.3155	68.2739	78.2135	69.8513	109.12	120.399	117.651	900.398	4.0016	12.2462	7.14202	8.32648	5.69921	7.58264	8.68655	7.75782	12.1191	13.3718	13.0666
3435	sp|Q8N3F8|MILK1_HUMAN	MICALL1	MILK1_HUMAN MICAL-like protein 1	744	RESELIYVFKQQN	76.7327	R	R.ESELIY#VFK.Q	1	1	1	13.9752	21.0899	23.6476	21.8574	9.76688	21.8385	19.7247	30.0486	43.1891	48.9736	40.3757	294.487	36.0021	33.7643	52.9151	50.2236	36.0529	58.9627	56.1904	71.4501	43.1891	51.5794	47.9722	538.302	6.68809	6.27237	9.83001	9.33001	6.69752	10.9535	10.4385	13.2732	8.02321	9.58188	8.91177
38	sp|O60716|CTND1_HUMAN	CTNND1	CTND1_HUMAN Catenin delta-1	600	IPQAERYQEAAPN	87.149	R	R.Y#QEAAPNVANNTGPHAASCFGAK.K	1	1	1	13.8526	147.705	99.684	105.027	21.1171	152.848	108.567	129.894	148.133	147.501	100.512	1174.84	35.6863	236.473	223.058	241.33	77.9503	412.681	309.279	308.864	148.133	155.349	119.422	2268.23	1.57331	10.4254	9.83404	10.6396	3.43662	18.194	13.6353	13.617	6.53078	6.84894	5.26501
1000	sp|Q9UQC2|GAB2_HUMAN	GAB2	GAB2_HUMAN GRB2-associated-binding protein 2	614	STGSVDYLALDFQ	16.062	R	K.STGSVDY#LALDFQPSSPSPHR.K	1	2	1	13.796	34.1058	12.5997	24.3252	7.61078	18.6978	16.7185	18.7192	62.0448	70.5279	62.3724	341.518	35.5406	54.6024	28.1939	55.8942	28.094	50.4829	47.6265	44.5108	62.0448	74.2806	74.1075	555.378	6.39935	9.83158	5.07652	10.0642	5.05853	9.08983	8.57551	8.01451	11.1716	13.3748	13.3436
403	sp|Q15262-3|PTPRK_HUMAN	PTPRK	PTPRK_HUMAN Isoform 3 of Receptor-type tyrosine-protein phosphatase kappa	850	LLDVPRYLCEGTE	44.973	R	R.Y#LCEGTESPYQTGQLHPAIR.V	1	1	1	13.7918	29.124	15.0105	17.6026	9.82614	12.3565	15.046	14.2686	40.9642	50.7137	37.9697	256.674	35.5297	46.6268	33.5882	40.4471	36.2716	33.3619	42.862	33.9281	40.9642	53.4121	45.1135	442.105	8.03648	10.5465	7.59734	9.14874	8.20429	7.54613	9.69498	7.67422	9.26572	12.0813	10.2043
1484	sp|O14964|HGS_HUMAN	HGS	HGS_HUMAN Hepatocyte growth factor-regulated tyrosine kinase substrate	289	KSTYTSYPKAEPM	24.437	R	K.STYTSY#PK.A	1	2	2	13.734	97.2998	219.454	524.605	25.9624	115.175	246.326	551.185	1857.6	1837.03	841.225	6329.6	35.3809	155.774	491.062	1205.43	95.836	310.967	701.718	1310.62	1857.6	1934.77	999.496	9098.66	0.388858	1.71206	5.39708	13.2484	1.0533	3.41772	7.71232	14.4045	20.4162	21.2644	10.9851
2579	sp|A1X283|SPD2B_HUMAN	SH3PXD2B	SPD2B_HUMAN SH3 and PX domain-containing protein 2B	855	GLKDSLYVAVADF	48.8739	U	K.DSLY#VAVADFEGDK.D	1	2	1	13.64	53.7062	59.7555	46.259	14.6412	50.8299	54.2949	49.8687	125.719	115.917	64.3943	649.026	35.1386	85.9823	133.712	106.293	54.0455	137.238	154.672	118.579	125.719	122.085	76.5097	1149.97	3.0556	7.47689	11.6274	9.24311	4.69971	11.934	13.45	10.3114	10.9323	10.6163	6.65317
2486	sp|P21291|CSRP1_HUMAN	CSRP1	CSRP1_HUMAN Cysteine and glycine-rich protein 1	71	KYGPKGYGYGQGA	17.0091	R	K.GY#GYGQGAGTLSTDK.G	1	1	1	13.588	40.8305	25.6665	33.0383	15.2474	18.9959	15.598	25.5654	59.0758	68.7106	57.8305	374.147	35.0047	65.3686	57.4327	75.915	56.2832	51.2879	44.4346	60.7898	59.0758	72.3666	68.711	646.67	5.41308	10.1085	8.8813	11.7394	8.70355	7.93108	6.87129	9.40044	9.13538	11.1907	10.6254
442	sp|Q14669-3|TRIPC_HUMAN	TRIP12	TRIPC_HUMAN Isoform 3 of E3 ubiquitin-protein ligase TRIP12	859	NSNTSGYSESKKD	17.0091	R	R.KPNPLANSNTSGY#SESK.K	1	1	1	13.49	90.1827	62.3679	37.5941	14.8503	50.3537	41.7406	34.0366	120.031	112.101	64.1062	640.854	34.7521	144.38	139.558	86.3832	54.8174	135.952	118.908	80.9328	120.031	118.066	76.1674	1109.95	3.13097	13.0078	12.5733	7.78264	4.93874	12.2485	10.7129	7.29159	10.8141	10.6371	6.86225
2323	sp|O00192|ARVC_HUMAN	ARVCF	ARVC_HUMAN Armadillo repeat protein deleted in velo-cardio-facial syndrome	182	ATLSRAYLSSGGG	37.5398	R	R.AY#LSSGGGFPEGPEPR.D	1	1	1	13.3851	28.8614	20.556	17.2913	9.47493	13.499	17.3357	20.786	39.0479	34.5714	35.5088	250.318	34.4819	46.2063	45.9972	39.7318	34.9752	36.4466	49.3848	49.4254	39.0479	36.4109	42.1896	454.298	7.59016	10.1709	10.1249	8.74577	7.69874	8.02262	10.8706	10.8795	8.59522	8.01477	9.28678
2760	sp|Q9UHP3-3|UBP25_HUMAN	USP25	UBP25_HUMAN Isoform USP25m of Ubiquitin carboxyl-terminal hydrolase 25	69	QQEETTYYQTALP	17.0091	R	K.TPQQEETTY#YQTALPGNDR.Y	1	1	1	13.3341	18.4614	20.2078	14.9584	22.3953	16.0303	13.2491	20.0967	31.537	25.779	23.6193	219.669	34.3507	29.5562	45.2182	34.3713	82.6687	43.281	37.7432	47.7863	31.537	27.1507	28.0632	441.726	7.77646	6.69106	10.2367	7.78113	18.7149	9.79814	8.54448	10.8181	7.13948	6.1465	6.35306
2609	sp|Q969M3-3|YIPF5_HUMAN	YIPF5	YIPF5_HUMAN Isoform 3 of Protein YIPF5	42	SKQYAGYDYSQQG	17.0091	R	K.QYAGY#DYSQQGR.F	1	2	1	13.3317	33.2418	29.9531	25.3687	21.3712	24.8016	16.4691	25.3241	30.4084	40.7913	36.7611	297.822	34.3445	53.2192	67.0246	58.292	78.8885	66.9628	46.9161	60.216	30.4084	42.9617	43.6775	582.911	5.89189	9.1299	11.4983	10.0001	13.5335	11.4877	8.04858	10.3302	5.21665	7.3702	7.49299
3062	sp|Q13573|SNW1_HUMAN	SNW1	SNW1_HUMAN SNW domain-containing protein 1	459	NLDKDMYGDDLEA	1000	R	K.DM*Y#GDDLEAR.I	1	1	1	13.2402	25.3762	12.5607	9.52651	12.5	11.1199	10.6658	12.0187	46.4784	55.6619	48.6535	257.802	34.1088	40.6266	28.1065	21.8899	46.1417	30.0231	30.3839	28.5784	46.4784	58.6236	57.8073	422.768	8.06797	9.60967	6.6482	5.17775	10.9142	7.10155	7.1869	6.75982	10.9938	13.8666	13.6735
448	sp|Q16625|OCLN_HUMAN	OCLN	OCLN_HUMAN Occludin	420	EDWIREYPPITSD	59.2977	R	R.EY#PPITSDQQR.Q	1	1	1	13.1948	13.6267	19.3119	24.3187	12.591	42.5603	29.9756	41.864	43.953	35.7884	26.6556	303.84	33.9917	21.8159	43.2133	55.8791	46.4776	114.911	85.3926	99.5451	43.953	37.6926	31.6707	614.542	5.53122	3.54995	7.03179	9.0928	7.56297	18.6986	13.8953	16.1983	7.15214	6.13345	5.15354
1119	sp|P41240|CSK_HUMAN	CSK	CSK_HUMAN Tyrosine-protein kinase CSK	18	TECIAKYNFHGTA	30.6121	R	K.Y#NFHGTAEQDLPFCK.G	1	1	1	13.004	34.3363	35.3197	116.051	19.3183	37.7231	47.5823	113.814	90.4614	113.24	139.784	760.635	33.5001	54.9716	79.0332	266.661	71.3104	101.85	135.549	270.63	90.4614	119.265	166.084	1389.32	2.41127	3.95674	5.68864	19.1937	5.13277	7.33097	9.75654	19.4794	6.51122	8.58447	11.9544
997	sp|Q9UQC2|GAB2_HUMAN	GAB2	GAB2_HUMAN GRB2-associated-binding protein 2	409	ASSCETYEYPQRG	30.8348	R	R.ASSCETY#EYPQR.G	1	1	1	12.9045	42.0583	27.7871	15.9573	11.6721	13.7187	12.5169	12.5438	39.3199	41.6823	28.293	258.454	33.2438	67.3343	62.1779	36.6665	43.0856	37.0397	35.6574	29.827	39.3199	43.9001	33.6162	461.868	7.19769	14.5787	13.4622	7.93873	9.32855	8.01954	7.72025	6.4579	8.51323	9.5049	7.2783
1125	sp|Q8IY67-2|RAVR1_HUMAN	RAVER1	RAVR1_HUMAN Isoform 2 of Ribonucleoprotein PTB-binding 1	585	GLSDSYSFDYPSD	17.0091	R	R.LPPEPGLSDSYS#FDYPSDMGPR.R	0	1	1	12.6876	19.3741	16.4816	11.948	7.2702	11.5939	9.07413	15.1327	38.6104	34.483	29.5353	206.191	32.6852	31.0174	36.88	27.454	26.8368	31.3029	25.8498	35.9829	38.6104	36.3178	35.0922	358.029	9.12919	8.66336	10.3008	7.6681	7.49569	8.74311	7.22002	10.0503	10.7841	10.1438	9.80148
2983	sp|Q9UPU5|UBP24_HUMAN	USP24	UBP24_HUMAN Ubiquitin carboxyl-terminal hydrolase 24	101	FDPPPAYHEVVDA	53.5672	U	R.GGSTGGGGGFDPPPAY#HEVVDAEK.N	1	1	1	12.5258	127.134	63.6854	36.5205	11.3961	36.4166	34.6847	43.3141	380.686	466.299	282.603	1495.27	32.2682	203.539	142.506	83.9164	42.0668	98.3227	98.8076	102.993	380.686	491.11	335.773	2011.99	1.6038	10.1163	7.08283	4.17082	2.0908	4.88684	4.91094	5.11898	18.9209	24.4092	16.6886
2123	sp|Q6IAA8|LTOR1_HUMAN	LAMTOR1	LTOR1_HUMAN Ragulator complex protein LAMTOR1	140	RIAAYAYSALSQI	17.0091	U	R.IAAYAY#SALSQIR.V	1	1	1	12.4473	26.1152	14.2086	17.0682	11.0431	12.5836	12.5971	18.9094	44.7612	45.054	55.9406	270.728	32.066	41.8098	31.7938	39.2191	40.7639	33.9749	35.8857	44.9632	44.7612	47.4513	66.4655	459.154	6.9837	9.10583	6.92443	8.54158	8.87805	7.39946	7.8156	9.79261	9.74861	10.3345	14.4756
3145	sp|P42229|STA5A_HUMAN	STAT5A	STA5A_HUMAN Signal transducer and activator of transcription 5A	694	AKAVDGYVKPQIK	1000	R	K.AVDGY#VKPQIK.Q	1	2	2	12.255	432.168	596.993	808.16	44.5863	425.118	693.669	888.664	1830.78	1591.67	1391.73	8715.8	31.5706	691.89	1335.86	1856.98	164.583	1147.8	1976.08	2113.08	1830.78	1676.37	1653.58	14478.6	0.21805	4.77872	9.22648	12.8257	1.13674	7.92755	13.6483	14.5946	12.6447	11.5783	11.4209
829	sp|Q15019-2|SEPT2_HUMAN	2017-09-02	SEPT2_HUMAN Isoform 2 of Septin-2	52	NPETPGYVGFANL	33.6572	R	K.QQPTQFINPETPGY#VGFANLPNQVHR.K	1	1	1	12.0604	42.4507	32.4125	18.7973	8.467	20.2282	16.4219	19.846	52.3619	66.3571	48.2673	337.67	31.0693	67.9625	72.528	43.1923	31.2546	54.615	46.7815	47.1903	52.3619	69.8879	57.3486	574.192	5.41097	11.8362	12.6313	7.52227	5.44323	9.51163	8.14736	8.21855	9.11924	12.1715	9.9877
44	sp|O60716|CTND1_HUMAN	CTNND1	CTND1_HUMAN Catenin delta-1	334	EVPSDQYYWAPLA	19.8431	R	R.SYEDM*IGEEVPSDQY#YWAPLAQHER.G	1	1	1	11.9817	29.5706	18.258	15.7584	10.6709	19.8396	14.5369	14.1761	54.3178	52.7358	48.3253	290.171	30.8666	47.3417	40.8551	36.2094	39.39	53.5658	41.4116	33.7083	54.3178	55.5418	57.4175	490.626	6.29128	9.64925	8.32715	7.38024	8.02853	10.9179	8.44057	6.87047	11.0711	11.3206	11.7029
1185	sp|O14828|SCAM3_HUMAN	SCAMP3	SCAM3_HUMAN Secretory carrier-associated membrane protein 3	35	HRPSRQYATLDVY	48.8739	U	R.QY#ATLDVYNPFETR.E	1	1	1	11.8909	34.4634	29.4048	37.8129	11.1315	29.0792	23.7883	39.6996	127.018	182.541	134.402	661.231	30.6326	55.175	65.7978	86.8861	41.09	78.5122	67.7666	94.3985	127.018	192.254	159.689	999.219	3.06566	5.52182	6.58493	8.6954	4.11221	7.85736	6.78195	9.44722	12.7117	19.2404	15.9813
607	sp|Q9C0C2|TB182_HUMAN	TNKS1BP1	TB182_HUMAN 182 kDa tankyrase-1-binding protein	897	RDSLGAYASQDAN	20.1669	R	K.RDSLGAY#ASQDANEQGQDLGK.R	1	1	1	11.7913	43.6502	23.2414	16.5811	11.4436	20.8988	14.4375	17.5821	35.9236	32.6315	33.96	262.141	30.3761	69.8828	52.0061	38.0998	42.2421	56.4256	41.1286	41.8071	35.9236	34.3678	40.3494	482.609	6.29415	14.4802	10.776	7.89454	8.75286	11.6918	8.52215	8.66273	7.44362	7.12124	8.36068
3412	sp|O60447|EVI5_HUMAN	EVI5	EVI5_HUMAN Ecotropic viral integration site 5 protein homolog	692	KSDSNQYIGELKD	13.3795	R	K.SDSNQY#IGELK.D	1	1	1	11.7008	25.3446	23.9101	18.014	10.1657	17.932	17.408	22.4949	54.7451	51.5609	23.94	277.216	30.1429	40.576	53.5024	41.3923	37.5249	48.4154	49.5907	53.4889	54.7451	54.3044	28.4441	492.127	6.12503	8.24502	10.8717	8.41089	7.62505	9.83799	10.0768	10.8689	11.1242	11.0346	5.77983
1468	sp|Q5T0N5|FBP1L_HUMAN	FNBP1L	FBP1L_HUMAN Formin-binding protein 1-like	506	ESPEGSYTDDANQ	30.8348	R	R.ESPEGSY#TDDANQEVR.G	1	1	1	11.6016	30.2155	17.8781	16.5495	11.7928	13.1192	9.52283	13.3211	34.5536	42.7582	54.7275	256.04	29.8875	48.3742	40.0051	38.0272	43.5314	35.4211	27.128	31.6751	34.5536	45.0333	65.0241	438.661	6.81336	11.0277	9.11982	8.66894	9.9237	8.07483	6.18428	7.22087	7.87707	10.2661	14.8233
3675	sp|Q92900|RENT1_HUMAN	UPF1	RENT1_HUMAN Regulator of nonsense transcripts 1	1118	YQGERAYQHGGVT	33.6572	R	R.AY#QHGGVTGLSQY.-	1	1	1	11.1499	29.5479	17.0048	20.7197	17.8204	17.2646	12.9431	20.6464	36.8416	45.3244	50.0417	279.305	28.7237	47.3054	38.0509	47.6095	65.7813	46.6135	36.8715	49.0935	36.8416	47.7361	59.4567	504.084	5.69821	9.38444	7.54853	9.44475	13.0497	9.24718	7.31456	9.73916	7.30862	9.46987	11.795
343	sp|P46109|CRKL_HUMAN	CRKL	CRKL_HUMAN Crk-like protein	105	IEPAPRYPSPPMG	14.966	U	R.Y#PSPPM*GSVSAPNLPTAEDNLEYVR.T	1	2	1	10.7935	38.9036	30.7885	39.6973	6.3462	26.4201	24.6081	44.6632	101.195	101.609	111.145	536.17	27.8056	62.2836	68.8939	91.216	23.426	71.3329	70.102	106.201	101.195	107.015	132.057	861.528	3.22747	7.22943	7.99671	10.5877	2.71912	8.27981	8.13694	12.327	11.746	12.4215	15.3282
2688	sp|Q9H1C4|UN93B_HUMAN	UNC93B1	UN93B_HUMAN Protein unc-93 homolog B1	585	GRRPCPYEQAQGG	1000	R	R.RPCPY#EQAQGGDGPEEQ.-	1	1	1	10.6721	25.976	37.3059	16.4164	31.903	35.0964	28.2393	34.8521	35.6472	40.2227	35.7409	332.072	27.493	41.587	83.4777	37.7215	117.765	94.7583	80.4462	82.872	35.6472	42.3629	42.4653	686.596	4.00424	6.05698	12.1582	5.49399	17.152	13.8012	11.7167	12.07	5.19187	6.17	6.18491
1859	sp|Q86V48|LUZP1_HUMAN	LUZP1	LUZP1_HUMAN Leucine zipper protein 1	799	TSSITIYPSDSSS	30.8348	R	K.VTSSITIY#PSDSSSPR.A	1	1	1	10.6102	33.3334	30.9717	26.3416	7.16943	25.1121	24.1869	33.5008	73.0942	81.8143	67.439	413.574	27.3335	53.3659	69.304	60.5274	26.4648	67.8013	68.902	79.6588	73.0942	86.1675	80.1273	692.747	3.94568	7.70352	10.0042	8.7373	3.82027	9.78731	9.94621	11.499	10.5514	12.4385	11.5666
1189	sp|Q9Y6I3-1|EPN1_HUMAN	EPN1	EPN1_HUMAN Isoform 2 of Epsin-1	540	LAEAVGSPPPAAT	26.1051	R	R.GSLAEAVGS#PPPAATPTPTPPTRK.T	0	1	1	10.42	21.5967	25.1809	42.758	9.31467	14.418	16.9526	25.1043	43.5253	46.4087	52.8551	308.534	26.8436	34.5758	56.346	98.2487	34.3836	38.9277	48.2935	59.6935	43.5253	48.8781	62.7994	552.515	4.85843	6.25789	10.1981	17.7821	6.2231	7.04555	8.74067	10.804	7.87767	8.84647	11.3661
2058	sp|Q9H1Z4|WDR13_HUMAN	WDR13	WDR13_HUMAN WD repeat-containing protein 13	117	SVSRGSYQLQAQM	24.437	U	R.GSY#QLQAQMNR.A	1	1	1	10.2281	17.3477	13.8777	33.2937	9.3373	13.3067	16.7606	18.4894	236.349	367.478	575.426	1311.89	26.349	27.7733	31.0536	76.5018	34.4672	35.9273	47.7465	43.9644	236.349	387.031	683.689	1630.85	1.61566	1.70299	1.90413	4.69091	2.11344	2.20298	2.9277	2.69579	14.4924	23.7318	41.9222
1173	sp|O43639|NCK2_HUMAN	NCK2	NCK2_HUMAN Cytoplasmic protein NCK2	99	PSTDAEYPANGSG	60.3582	R	R.DASPTPSTDAEY#PANGSGADR.I	1	1	1	10.1489	33.6841	21.9002	17.1016	8.43663	16.9967	16.6228	10.7063	73.0836	68.7406	46.6121	324.034	26.1449	53.9274	49.005	39.2959	31.1425	45.8902	47.3538	25.4575	73.0836	72.3982	55.3819	519.081	5.03677	10.389	9.44073	7.57029	5.99954	8.84067	9.12262	4.90435	14.0794	13.9474	10.6692
587	sp|Q9BQE3|TBA1C_HUMAN	TUBA1C	TBA1C_HUMAN Tubulin alpha-1C chain	282	ISAEKAYHEQLTV	28.5286	R	K.AY#HEQLTVAEITNACFEPANQM*VK.C	1	2	1	9.98595	35.2326	18.9605	21.9642	6.53536	13.5607	10.305	9.93138	37.0284	41.3024	45.4898	250.296	25.7253	56.4065	42.4269	50.4692	24.1242	36.6131	29.3562	23.615	37.0284	43.5001	54.0485	423.313	6.07712	13.325	10.0226	11.9224	5.6989	8.64916	6.93487	5.57862	8.74728	10.2761	12.768
1188	sp|Q9Y6I3-1|EPN1_HUMAN	EPN1	EPN1_HUMAN Isoform 2 of Epsin-1	128	KNIVHNYSEAEIK	30.8348	R	K.NIVHNY#SEAEIK.V	1	1	1	9.98299	17.7355	70.273	199.096	15.3051	54.8622	135.158	278.491	369.202	340.348	196.897	1687.35	25.7176	28.3941	157.247	457.48	56.4963	148.125	385.03	662.202	369.202	358.458	233.943	2882.29	0.892263	0.985123	5.45561	15.8721	1.96012	5.13913	13.3585	22.9748	12.8093	12.4365	8.11655
337	sp|P22626|ROA2_HUMAN	HNRNPA2B1	ROA2_HUMAN Heterogeneous nuclear ribonucleoproteins A2/B1	262	FGGSPGYGGGRGG	40.9777	R	R.GFGDGYNGYGGGPGGGNFGGSPGY#GGGR.G	1	1	1	9.58641	29.1482	24.059	20.8244	10.8843	9.4433	12.5481	15.8882	30.5981	27.0575	26.7481	216.786	24.696	46.6655	53.8356	47.85	40.1776	25.4964	35.7462	37.7792	30.5981	28.4972	31.7806	403.122	6.12618	11.576	13.3547	11.8698	9.96661	6.32473	8.86734	9.37165	7.59027	7.06912	7.88361
2878	sp|O95405|ZFYV9_HUMAN	ZFYVE9	ZFYV9_HUMAN Zinc finger FYVE domain-containing protein 9	520	ECYSNIYEQRGNE	53.5337	R	K.SECYSNIY#EQR.G	1	1	1	8.95194	7.87026	12.8729	15.6111	8.74255	5.66629	9.47001	12.1606	72.5736	76.4768	81.123	311.519	23.0615	12.6001	28.8051	35.8709	32.2717	15.2987	26.9775	28.9157	72.5736	80.546	96.3859	453.307	5.0874	2.77959	6.35443	7.91317	7.11918	3.3749	5.95128	6.37884	16.0098	17.7685	21.2628
1372	sp|Q99959|PKP2_HUMAN	PKP2	PKP2_HUMAN Plakophilin-2	166	HYTHSDYQYSQRS	31.2747	R	R.AHYTHSDY#QYSQR.S	1	3	1	8.89898	31.5529	10.9616	13.6643	0	10.1116	5.88728	5.6303	76.2874	72.2606	65.8587	301.114	22.9251	50.5153	24.5282	31.3976	0	27.3007	16.7713	13.3878	76.2874	76.1055	78.2496	417.469	5.49145	12.1004	5.87546	7.52096	0	6.53958	4.01738	3.20691	18.2738	18.2302	18.7438
765	sp|Q9H706|GAREM_HUMAN	GAREM	GAREM_HUMAN GRB2-associated and regulator of MAPK protein	596	STPVSCYPCNRVK	20.1669	R	K.TDTNPSESTPVSCY#PCNR.V	1	1	1	8.71164	31.0047	18.5293	15.5746	3.3671	12.6269	13.5361	11.1147	40.5977	54.681	47.2546	256.998	22.4425	49.6377	41.4621	35.787	12.4291	34.092	38.5608	26.4287	40.5977	57.5905	56.1452	415.173	5.40556	11.9559	9.98669	8.61978	2.99372	8.21152	9.28788	6.3657	9.77849	13.8714	13.5233
512	sp|Q9H6X4|TM134_HUMAN	TMEM134	TM134_HUMAN Transmembrane protein 134	57	KQSRLRYQNLEND	276.135	R	R.LRY#QNLENDEDGAQASPEPDGGVGTR.D	1	2	1	8.3125	57.8367	32.5434	37.7927	9.7239	21.8102	23.5154	34.0839	111.872	88.862	72.1855	498.539	21.4142	92.5951	72.8208	86.8396	35.8942	58.8863	66.9891	81.0454	111.872	93.5902	85.7668	807.714	2.65121	11.4638	9.01566	10.7513	4.44393	7.29048	8.29367	10.0339	13.8505	11.587	10.6185
1840	sp|Q15149|PLEC_HUMAN	PLEC	PLEC_HUMAN Plectin	4668	SGYGRRYASGSSA	30.8348	R	R.Y#ASGSSASLGGPESAVA.-	1	1	1	8.23374	26.4095	13.1758	19.1674	3.87288	15.2666	11.7608	13.2966	44.4331	45.8462	35.0682	236.531	21.2113	42.281	29.4829	44.0425	14.2961	41.2191	33.5033	31.6168	44.4331	48.2856	41.6661	392.038	5.41053	10.7849	7.52043	11.2342	3.64662	10.5141	8.54594	8.06474	11.3339	12.3166	10.6281
1331	sp|P22681|CBL_HUMAN	CBL	CBL_HUMAN E3 ubiquitin-protein ligase CBL	141	EGKERMYEENSQP	47.0452	U	R.M*Y#EENSQPR.R	1	8	3	8.11423	35.7244	15.9323	87.5871	2.24366	34.3197	45.0403	46.3665	164.202	135.969	115.1	690.599	20.9035	57.1938	35.651	201.256	8.28213	92.6612	128.308	110.251	164.202	143.204	136.755	1098.67	1.90262	5.20574	3.24493	18.3182	0.753833	8.43396	11.6785	10.035	14.9455	13.0343	12.4474
3694	sp|Q9UM82|SPAT2_HUMAN	SPATA2	SPAT2_HUMAN Spermatogenesis-associated protein 2	433	ASLREKYPGQTQG	20.1669	R	K.Y#PGQTQGLDR.L	1	1	1	7.97406	27.2844	18.7875	15.1759	7.16387	10.5071	10.3281	10.1877	44.1835	54.7767	38.6071	244.976	20.5423	43.6816	42.04	34.871	26.4443	28.3685	29.422	24.2244	44.1835	57.6913	45.8708	397.34	5.16997	10.9935	10.5804	8.77611	6.65534	7.13961	7.40474	6.09665	11.1198	14.5194	11.5445
862	sp|Q06124|PTN11_HUMAN	PTPN11	PTN11_HUMAN Tyrosine-protein phosphatase non-receptor type 11	546	KRKGHEYTNIKYS	30.8348	R	K.GHEY#TNIK.Y	1	1	1	7.81883	176.715	120.27	80.4505	3.69593	10.0644	11.614	8.31549	150.301	100.951	59.9586	730.155	20.1425	282.917	269.122	184.858	13.6429	27.1733	33.0852	19.7727	150.301	106.323	71.2394	1178.58	1.70905	24.0049	22.8345	15.6849	1.15758	2.3056	2.80721	1.67768	12.7527	9.02127	6.04453
2500	sp|Q02241|KIF23_HUMAN	KIF23	KIF23_HUMAN Kinesin-like protein KIF23	949	SQLGPGYQHHAQP	26.1051	R	R.AGSQLGPGY#QHHAQPK.R	1	1	1	7.46794	39.8491	36.6089	38.5628	7.18629	23.3862	32.7742	33.5631	93.091	92.0626	78.2673	482.819	19.2385	63.7974	81.9181	88.6092	26.527	63.1414	93.3648	79.807	93.091	96.9611	92.9928	799.449	2.40647	7.98018	10.2468	11.0838	3.31817	7.89812	11.6787	9.98276	11.6444	12.1285	11.6321
1481	sp|O14964|HGS_HUMAN	HGS	HGS_HUMAN Hepatocyte growth factor-regulated tyrosine kinase substrate	524	RQKKQEYLEVQRQ	1000	R	K.KQEY#LEVQR.Q	1	1	1	7.44756	25.5137	39.7658	73.8377	7.9671	19.755	45.6	86.6239	411.079	498.84	327.315	1543.74	19.186	40.8467	88.982	169.663	29.4093	53.3375	129.902	205.976	411.079	525.383	388.898	2062.66	0.930158	1.98029	4.31394	8.22545	1.42579	2.58586	6.29779	9.98593	19.9295	25.4711	18.8542
1363	sp|Q9UM54-6|MYO6_HUMAN	MYO6	MYO6_HUMAN Isoform 6 of Unconventional myosin-VI	1146	PKSVTDYAQQNPA	48.8739	R	K.SVTDY#AQQNPAAQIPAR.Q	1	1	1	7.12537	359.899	245.915	130.153	3.81231	129.031	104.628	118.522	495.321	734.566	348.018	2676.99	18.356	576.189	550.272	299.064	14.0725	348.376	298.058	281.823	495.321	773.652	413.496	4068.68	0.451153	14.1616	13.5246	7.35039	0.345874	8.56238	7.32566	6.92665	12.174	19.0148	10.1629
934	sp|Q13526|PIN1_HUMAN	PIN1	PIN1_HUMAN Peptidyl-prolyl cis-trans isomerase NIMA-interacting 1	23	RSSGRVYYFNHIT	24.437	R	R.VY#YFNHITNASQWERPSGNSSSGGK.N	1	1	1	6.17877	22.3066	28.0607	77.6853	7.16142	35.2644	48.0947	108.959	115.945	166.044	154.986	770.686	15.9174	35.7123	62.7901	178.504	26.4352	95.2118	137.009	259.085	115.945	174.88	184.146	1285.63	1.2381	2.77779	4.88398	13.8845	2.0562	7.40582	10.6569	20.1523	9.0185	13.6026	14.3233
385	sp|P00533|EGFR_HUMAN	EGFR	EGFR_HUMAN Epidermal growth factor receptor	1092	FLPVPEYINQSVP	56.1218	R	R.YSSDPTGALTEDSIDDTFLPVPEY#INQSVPK.R	1	1	1	5.91854	34.8841	19.4918	18.6949	5.98723	17.27	14.4098	17.5642	42.9239	47.0911	38.9626	263.198	15.247	55.8485	43.6159	42.9568	22.1009	46.6281	41.0496	41.7646	42.9239	49.5967	46.2932	448.025	3.40316	12.4655	9.73514	9.58803	4.93296	10.4075	9.16235	9.32193	9.58068	11.0701	10.3327
898	sp|P67809|YBOX1_HUMAN	YBX1	YBOX1_HUMAN Nuclease-sensitive element-binding protein 1	208	YGRRPQYSNPPVQ	19.8431	R	R.RPQY#SNPPVQGEVMEGADNQGAGEQGRPVR.Q	1	1	1	5.54853	26.6132	15.5588	15.0276	10.2433	14.2863	10.84	15.9537	35.799	43.2098	31.9721	225.053	14.2938	42.6071	34.8153	34.5302	37.8116	38.5723	30.8803	37.935	35.799	45.509	37.9875	390.741	3.65813	10.9042	8.91006	8.83711	9.67689	9.87158	7.90302	9.70846	9.16182	11.6468	9.72192
334	sp|P14866|HNRPL_HUMAN	HNRNPL	HNRPL_HUMAN Heterogeneous nuclear ribonucleoprotein L	92	GGGGENYDDPHKT	216.264	U	K.TDNAGDQHGGGGGGGGGAGAAGGGGGGENY#DDPHK.T	1	4	1	5.31668	60.7665	38.1394	26.2211	2.01686	25.2162	19.095	19.5074	39.8659	54.252	32.4301	322.827	13.6966	97.2856	85.3428	60.2504	7.44491	68.0824	54.3966	46.385	39.8659	57.1387	38.5316	568.421	2.40958	17.1151	15.014	10.5996	1.30975	11.9775	9.56978	8.16033	7.01345	10.0522	6.77871
524	sp|Q8IVM0-2|CCD50_HUMAN	CCDC50	CCD50_HUMAN Isoform 2 of Coiled-coil domain-containing protein 50	455	DGEDADYTHFTNQ	36.6555	R	K.NERPARPPPPIMTDGEDADY#THFTNQQSSTR.H	1	2	1	5.25235	31.4631	11.1876	13.725	2.24124	8.93266	7.6563	4.52622	60.8395	92.6871	61.417	299.928	13.5308	50.3716	25.0339	31.537	8.27318	24.1177	21.8108	10.7625	60.8395	97.6189	72.9722	416.868	3.24583	12.0833	6.00523	7.56523	1.9846	5.78544	5.23205	2.58176	14.5944	23.4172	17.5049
2635	sp|O95721|SNP29_HUMAN	SNAP29	SNP29_HUMAN Synaptosomal-associated protein 29	189	AMSTDAYPKNPHL	20.1669	R	R.GAGSAM*STDAY#PK.N	1	1	1	5.02944	27.3304	29.825	24.9047	4.03916	24.8042	21.3947	27.53	77.9041	67.1894	40.9942	350.945	12.9566	43.7553	66.7381	57.2256	14.9099	66.97	60.9476	65.4614	77.9041	70.7645	48.707	586.34	2.20974	7.46244	11.3821	9.7598	2.54288	11.4217	10.3946	11.1644	13.2865	12.0688	8.30696
2860	sp|Q96S55|WRIP1_HUMAN	WRNIP1	WRIP1_HUMAN ATPase WRNIP1	111	TESRESYDAPPTP	24.437	R	R.ESY#DAPPT#PSGAR.L	1	2	1	4.75974	29.9342	27.8287	42.7915	2.56898	12.8576	18.2158	32.8107	79.2492	109.92	152.417	513.354	12.2618	47.9239	62.2709	98.3258	9.48299	34.7147	51.8919	78.0179	79.2492	115.769	181.094	771.002	1.59037	6.2158	8.07663	12.753	1.22996	4.50255	6.73045	10.119	10.2787	15.0154	23.4881
1608	sp|O75886|STAM2_HUMAN	STAM2	STAM2_HUMAN Signal transducing adapter molecule 2	192	TETKSLYPSSEIQ	30.8348	R	K.SLY#PSSEIQLNNK.V	1	1	1	4.55011	101.388	147.81	360.186	14.3588	70.9263	156.623	276.585	1021.97	1238.92	850.512	4243.84	11.7218	162.319	330.748	827.631	53.0031	191.497	446.176	657.669	1021.97	1304.85	1010.53	6018.11	0.194775	2.69718	5.49587	13.7523	0.880726	3.18201	7.41389	10.9282	16.9816	21.682	16.7915
1839	sp|Q15149|PLEC_HUMAN	PLEC	PLEC_HUMAN Plectin	4611	AQSTKGYYSPYSV	44.2778	R	K.GY#YSPYSVSGSGSTAGSR.T	1	1	1	4.54451	19.9927	11.3752	21.0769	2.312	10.3484	14.5859	14.9355	99.7431	110.071	94.2368	403.222	11.7073	32.0078	25.4538	48.4301	8.53436	27.9402	41.5514	35.514	99.7431	115.928	111.967	558.777	2.09517	5.7282	4.55528	8.66717	1.52733	5.00025	7.43613	6.35567	17.8503	20.7467	20.0379
2662	sp|P98179|RBM3_HUMAN	RBM3	RBM3_HUMAN Putative RNA-binding protein 3	155	GNYRDNYDNxxxx	31.2747	U	R.YSGGNYRDNY#DN.-	1	1	1	3.22531	43.4226	25.3652	32.9456	6.98936	16.0607	9.44698	14.7008	29.881	63.4116	54.6433	300.093	8.30888	69.5185	56.7586	75.7019	25.8001	43.363	26.9119	34.9559	29.881	66.7857	64.9242	502.91	1.65216	13.8233	11.286	15.0528	5.13017	8.62242	5.35124	6.95073	5.94163	13.2799	12.9097
2659	sp|P46108|CRK_HUMAN	CRK	CRK_HUMAN Adapter molecule crk	136	RQEEAEYVRALFD	1000	R	R.QEEAEY#VR.A	1	1	1	0	11.1031	25.802	28.5433	3.33304	30.8757	32.0854	47.0488	52.7139	59.9652	40.6408	332.111	0	17.7758	57.7358	65.5864	12.3034	83.3626	91.4027	111.874	52.7139	63.1559	48.2871	604.197	0	2.94205	9.55579	10.8551	2.03632	13.7973	15.128	18.5161	8.72462	10.4529	7.99194
