# Supplementary material for: Time-resolved phosphoproteomics reveals scaffolding and catalysis-responsive patterns of SHP2-dependent signaling
Source: eLife journal article supplement (doi:10.7554/elife.64251), 2021-03-23
Supplement: supp [file elife-64251-supp-v1.zip › elife_poa_e64251_Supplementary_file_3.xlsx]

## Sheet: Sheet1
The 20 candidate substrate proteins tested
Protein name	Protein description	Immunoprecipitation - Western blot result	pY site with [SHP099/DMSO] FC > 2
ARHGAP35	RHG35_HUMAN Rho GTPase-activating protein 35	Substrate	1105
GRB2	GRB2_HUMAN Growth factor receptor-bound protein 2	Substrate	209
OCLN	OCLN_HUMAN Occludin	Substrate	443, 420
PLCG2	PLCG2_HUMAN 1-phosphatidylinositol 4,5-bisphosphate phosphodiesterase gamma-2	Substrate	818
PIK3R2	P85B_HUMAN Phosphatidylinositol 3-kinase regulatory subunit beta	No increase in pY abundance upon SHP099 treatment	453, 460, 464, 467
BAIAP2	BAIP2_HUMAN Brain-specific angiogenesis inhibitor 1-associated protein 2	No increase in pY abundance upon SHP099 treatment	164
CAPRIN1	CAPR1_HUMAN Caprin-1	No increase in pY abundance upon SHP099 treatment	78
CRK	CRK_HUMAN Adapter molecule crk	No increase in pY abundance upon SHP099 treatment	108, 136
DLG1	DLG1_HUMAN Isoform 2 of Disks large homolog 1	antibody sensitivity issue	782
DLG3	DLG3_HUMAN Disks large homolog 3	antibody sensitivity issue	673
SPTBN1	SPTB2_HUMAN Spectrin beta chain, non-erythrocytic 1	antibody sensitivity issue	2249
GNAI3	GNAI3_HUMAN Guanine nucleotide-binding protein G(k) subunit alpha	antibody sensitivity issue	61
ZC3HAV1	C9J6P4_HUMAN Zinc finger CCCH-type antiviral protein 1	antibody sensitivity issue	77
Cofilin	COF1_HUMAN Cofilin-1	antibody sensitivity issue	140
KIF23	KIF23_HUMAN Kinesin-like protein KIF23	antibody sensitivity issue	582
hnRNPA3	ROA3_HUMAN Heterogeneous nuclear ribonucleoprotein A3	antibody sensitivity issue	145
SND1	SND1_HUMAN Staphylococcal nuclease domain-containing protein 1	antibody sensitivity issue	329
STX4	STX4_HUMAN Syntaxin-4	antibody sensitivity issue	251, 115
SH3PXD2B	SPD2B_HUMAN SH3 and PX domain-containing protein 2B	antibody sensitivity issue	226, 855
UPF3B	REN3B_HUMAN Regulator of nonsense transcripts 3B	antibody sensitivity issue	117
MARVELD2	MALD2_HUMAN MARVEL domain-containing protein 2	antibody sensitivity issue	469
