# Supplementary material for: Time-resolved phosphoproteomics reveals scaffolding and catalysis-responsive patterns of SHP2-dependent signaling
Source: eLife journal article supplement (doi:10.7554/elife.64251), 2021-03-23

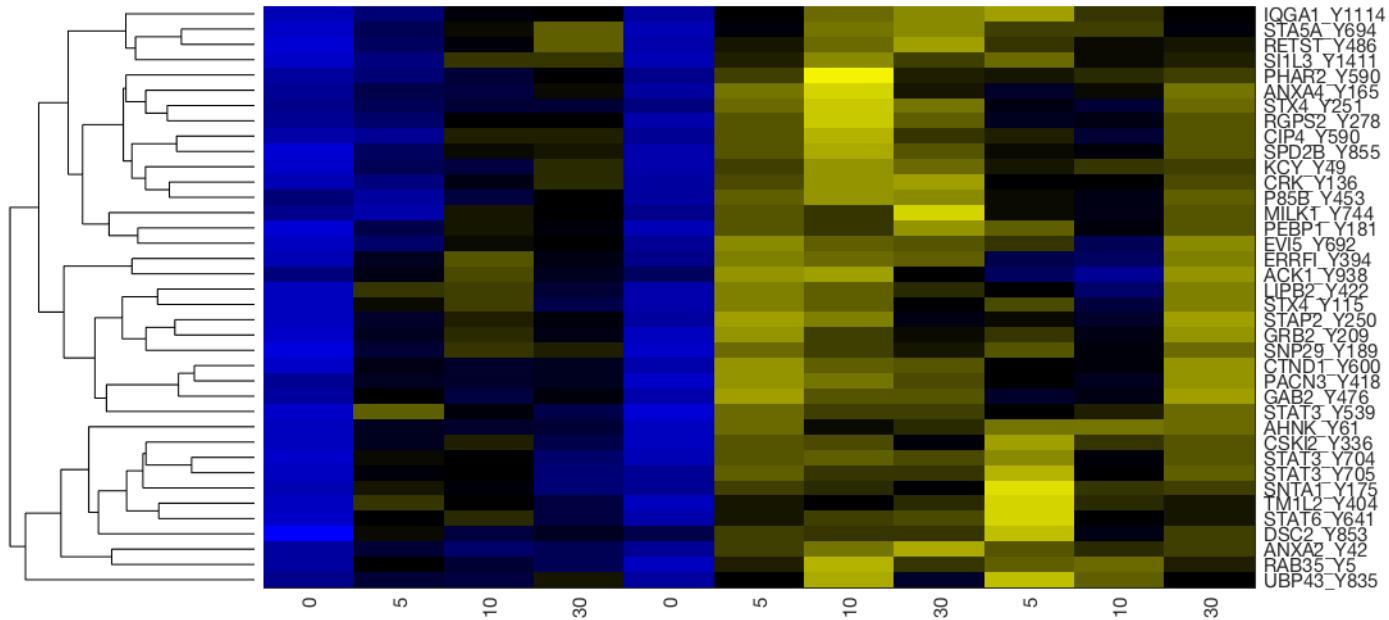

Supplement: supp [file elife_poa_e64251_Figure_2_figure_supplement_1_source_data_4.pdf › elife_poa_e64251_Figure_2_figure_supplement_1_source_data_4.pdf]
