# Supplementary figures and images for: Time-resolved phosphoproteomics reveals scaffolding and catalysis-responsive patterns of SHP2-dependent signaling
Source: eLife journal article supplement (doi:10.7554/elife.64251), 2021-03-23

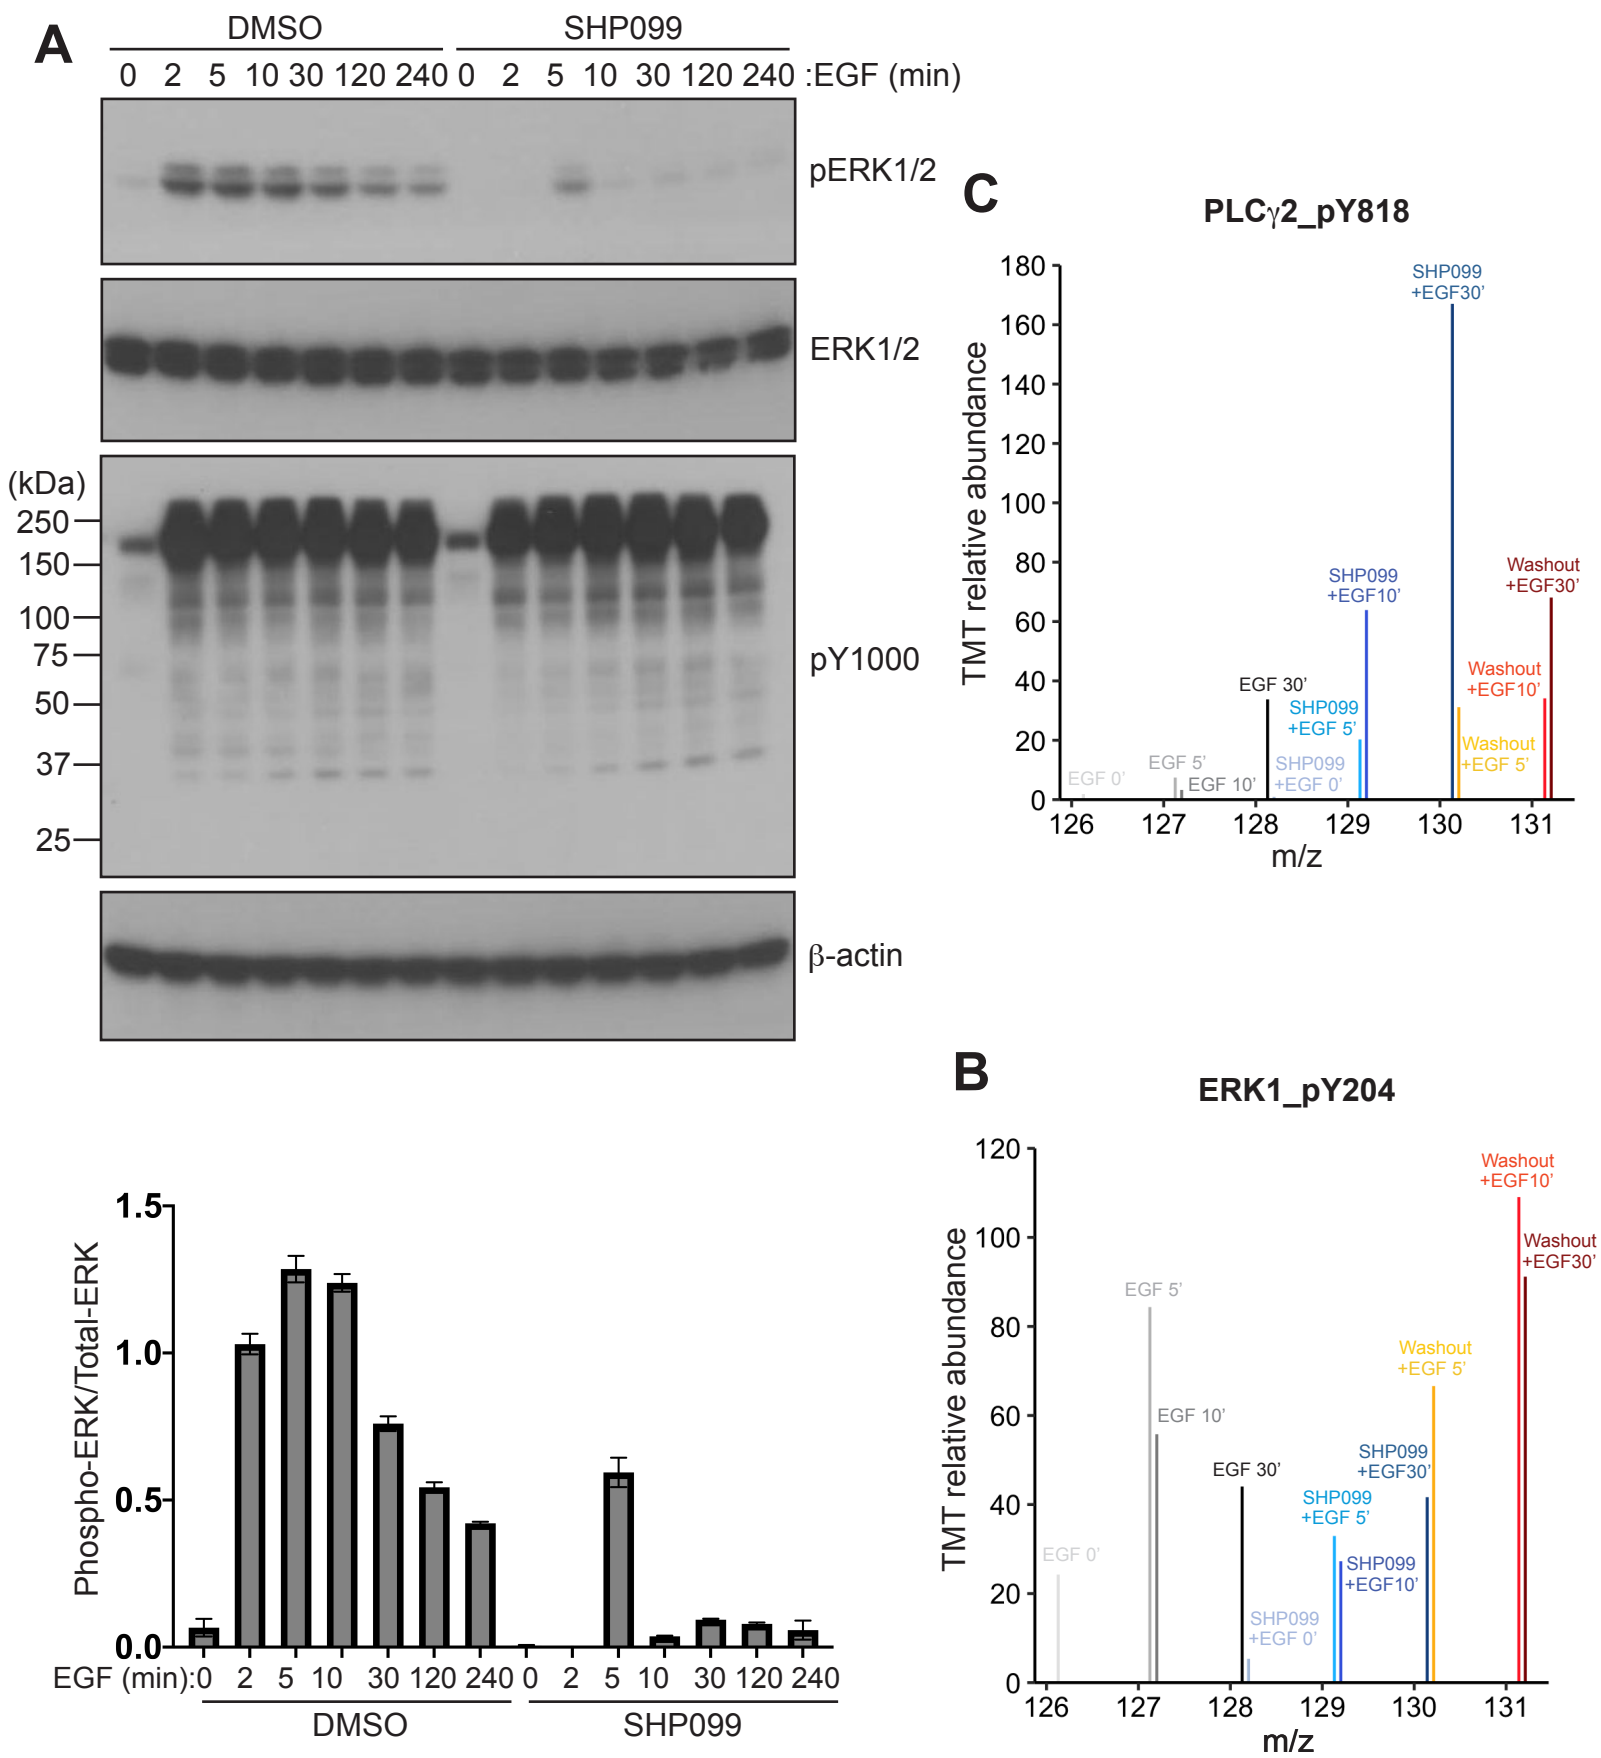

Figure 1 - Figure supplement 1

Supplement: supp [file elife-64251-supp-v1.zip › elife_poa_e64251_Figure_1_figure_supplement_1.pdf]

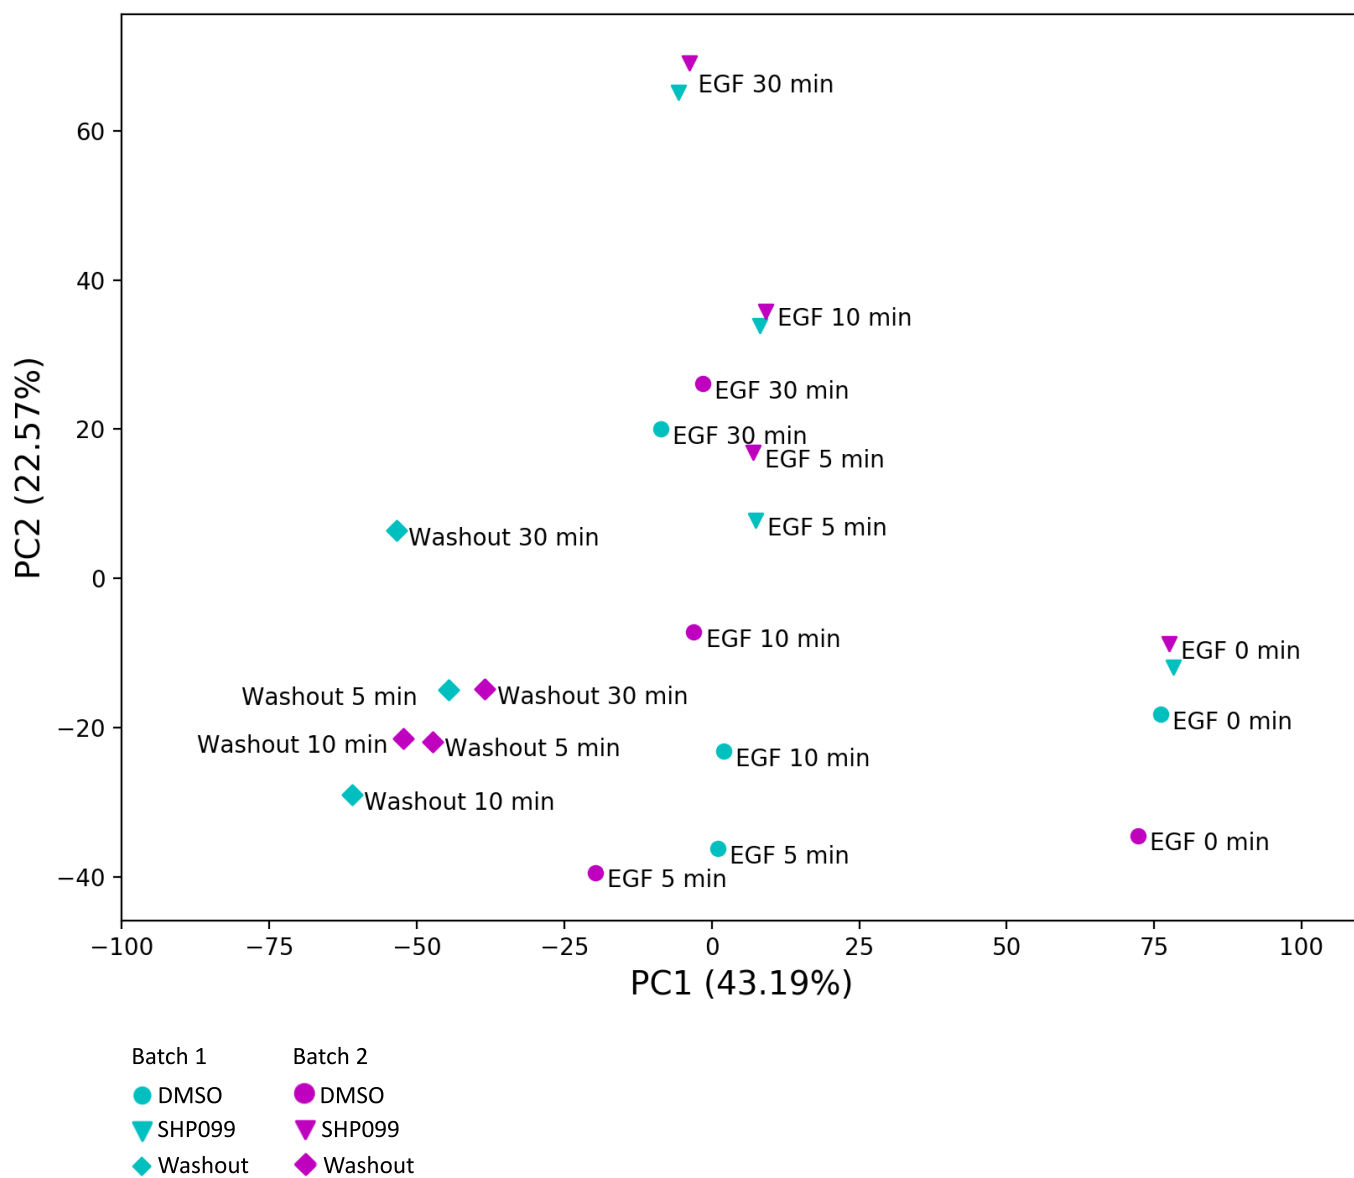

Figure 1-Figure supplement 2

Supplement: supp [file elife-64251-supp-v1.zip › elife_poa_e64251_Figure_1_figure_supplement_2.pdf]

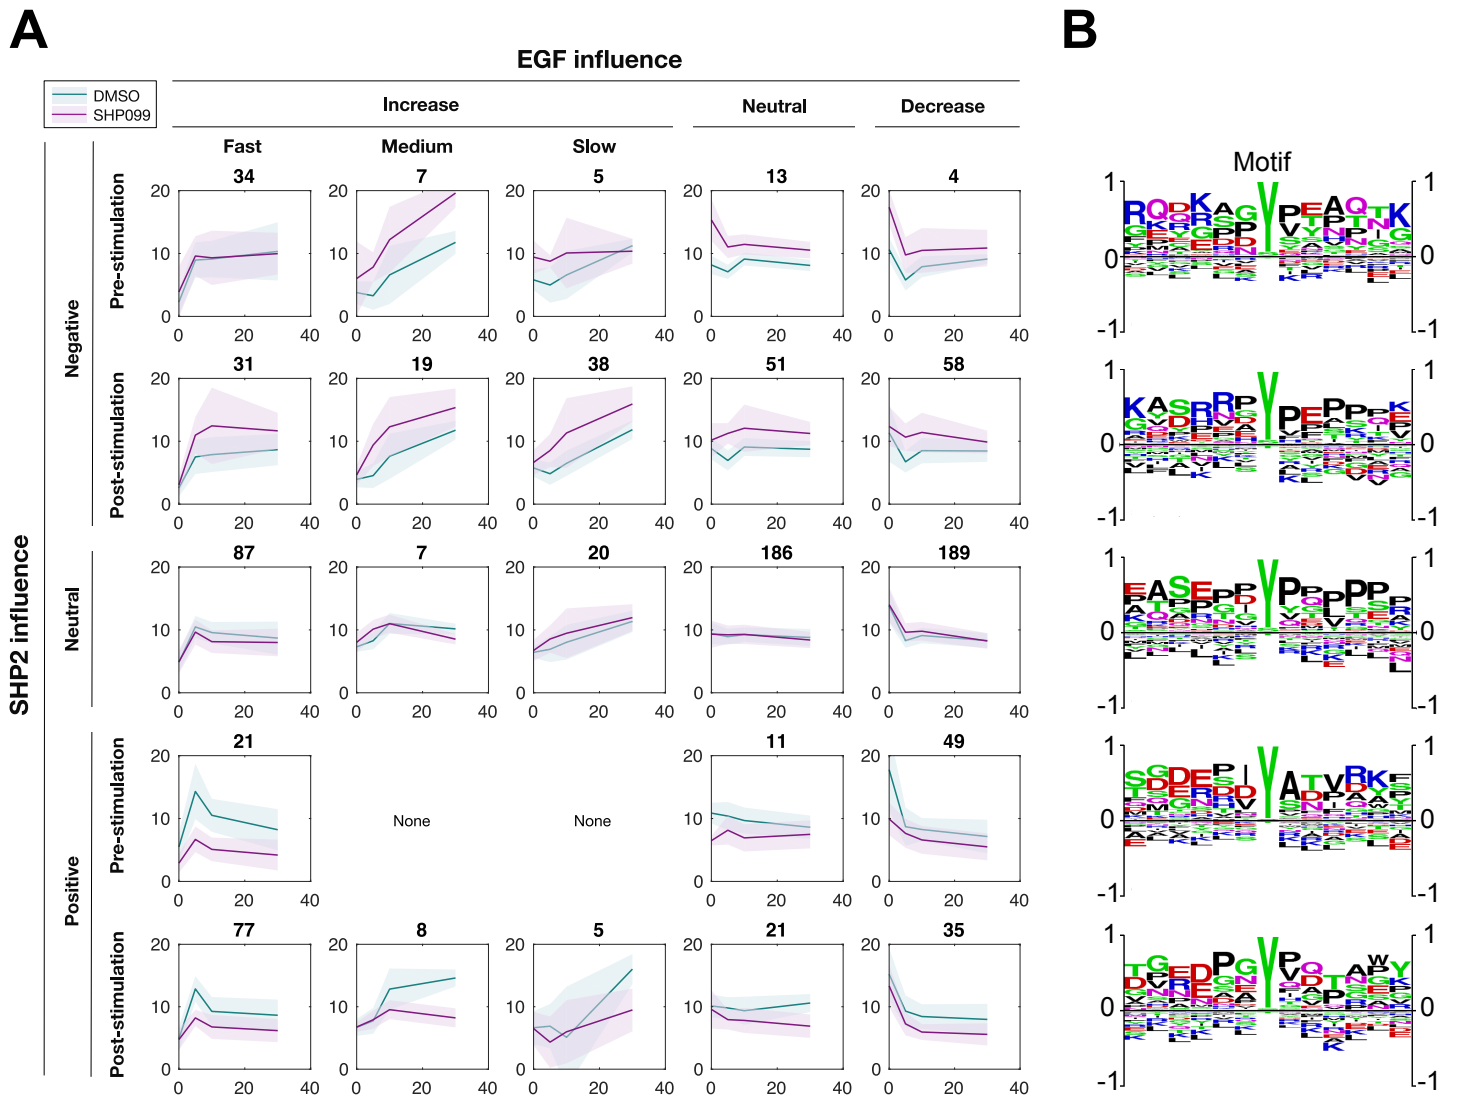

Figure 1-Figure supplement 3

Supplement: supp [file elife-64251-supp-v1.zip › elife_poa_e64251_Figure_1_figure_supplement_3.pdf]

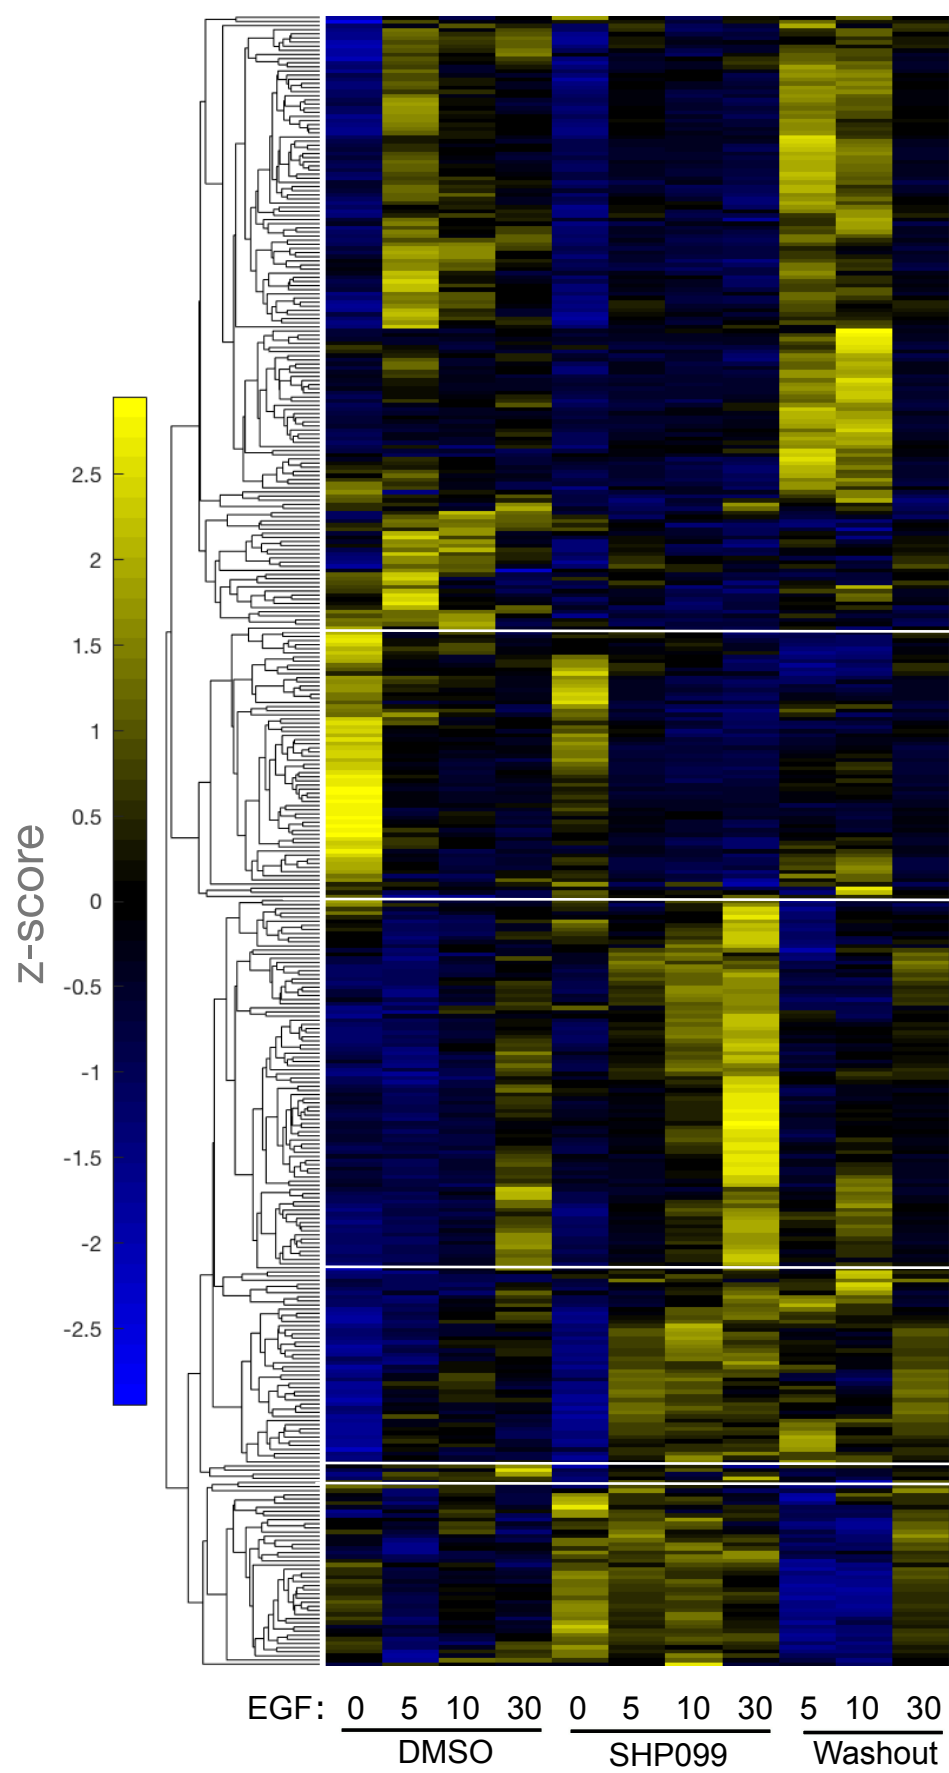

Figure 2-Figure supplement 1

Supplement: supp [file elife-64251-supp-v1.zip › elife_poa_e64251_Figure_2_figure_supplement_1.pdf]

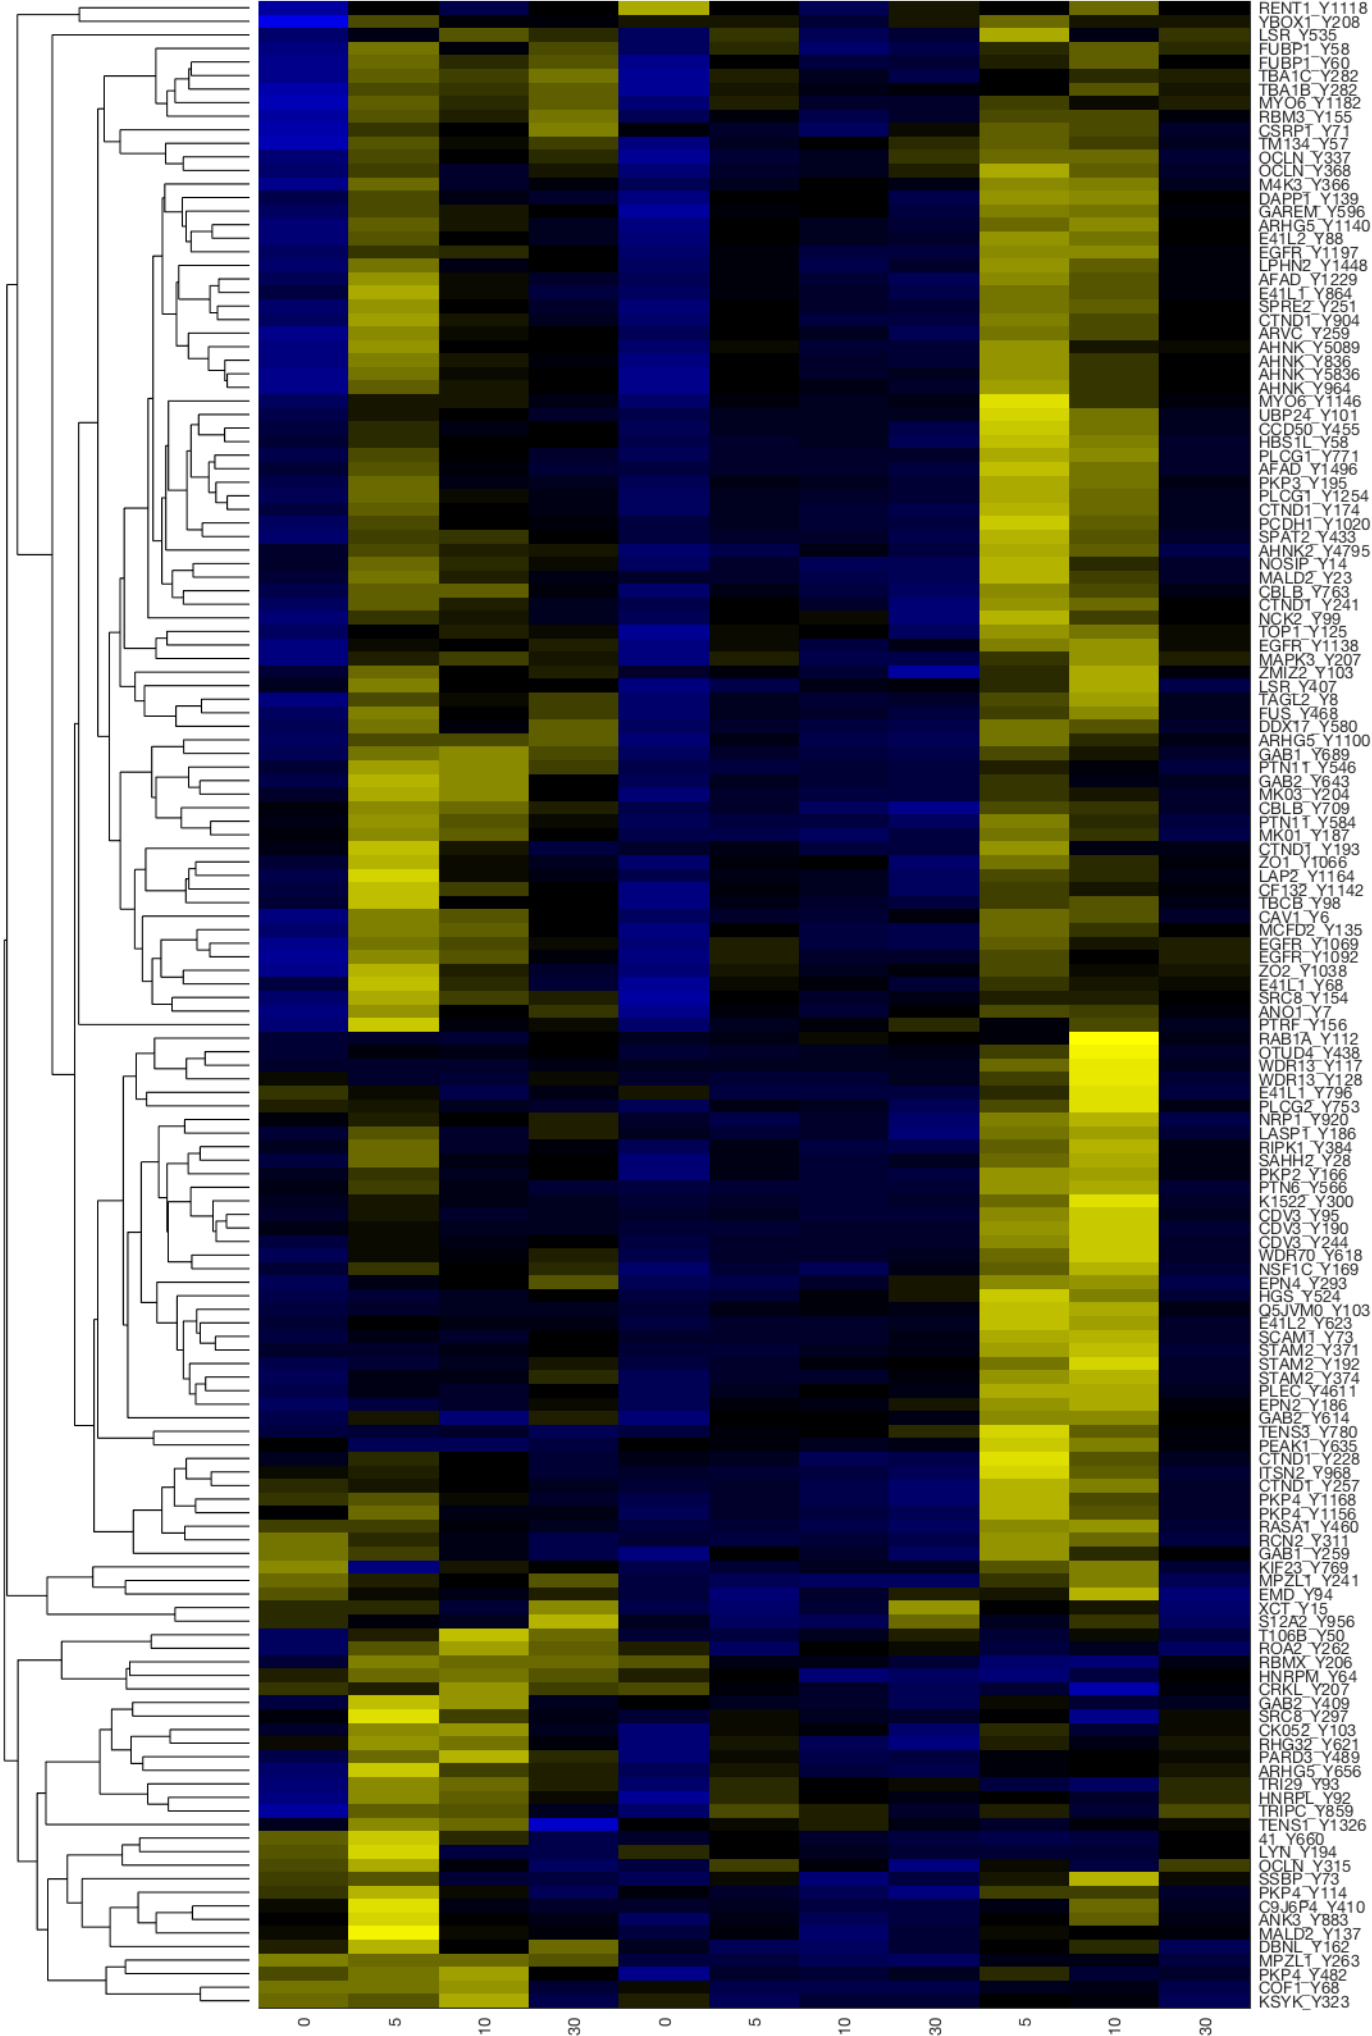

Supplement: supp [file elife-64251-supp-v1.zip › elife_poa_e64251_Figure_2_figure_supplement_1_source_data_1.pdf]

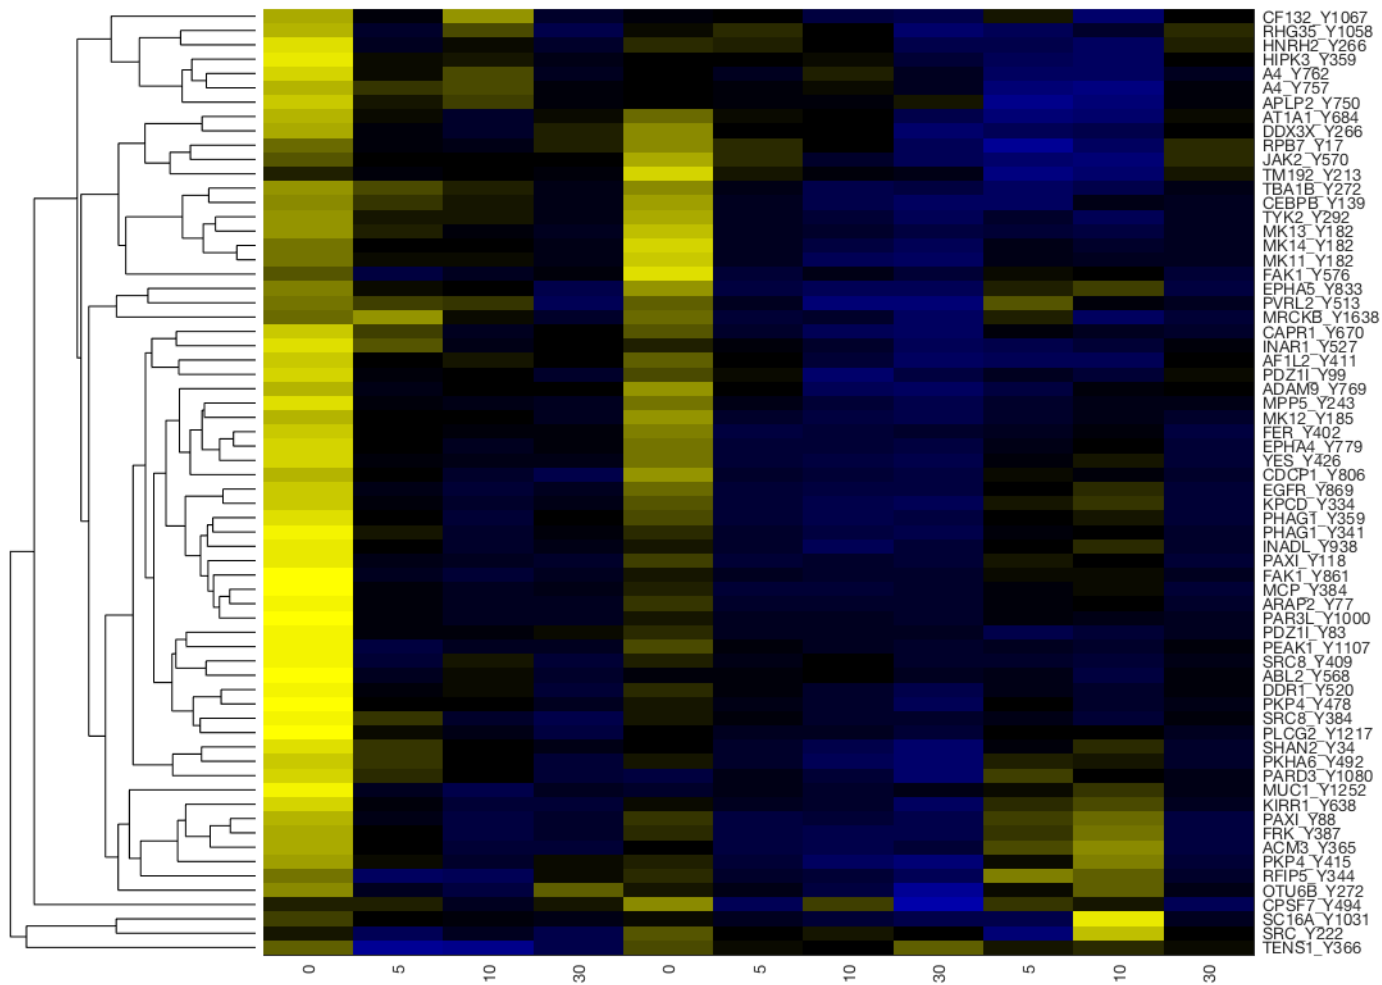

Supplement: supp [file elife-64251-supp-v1.zip › elife_poa_e64251_Figure_2_figure_supplement_1_source_data_2.pdf]

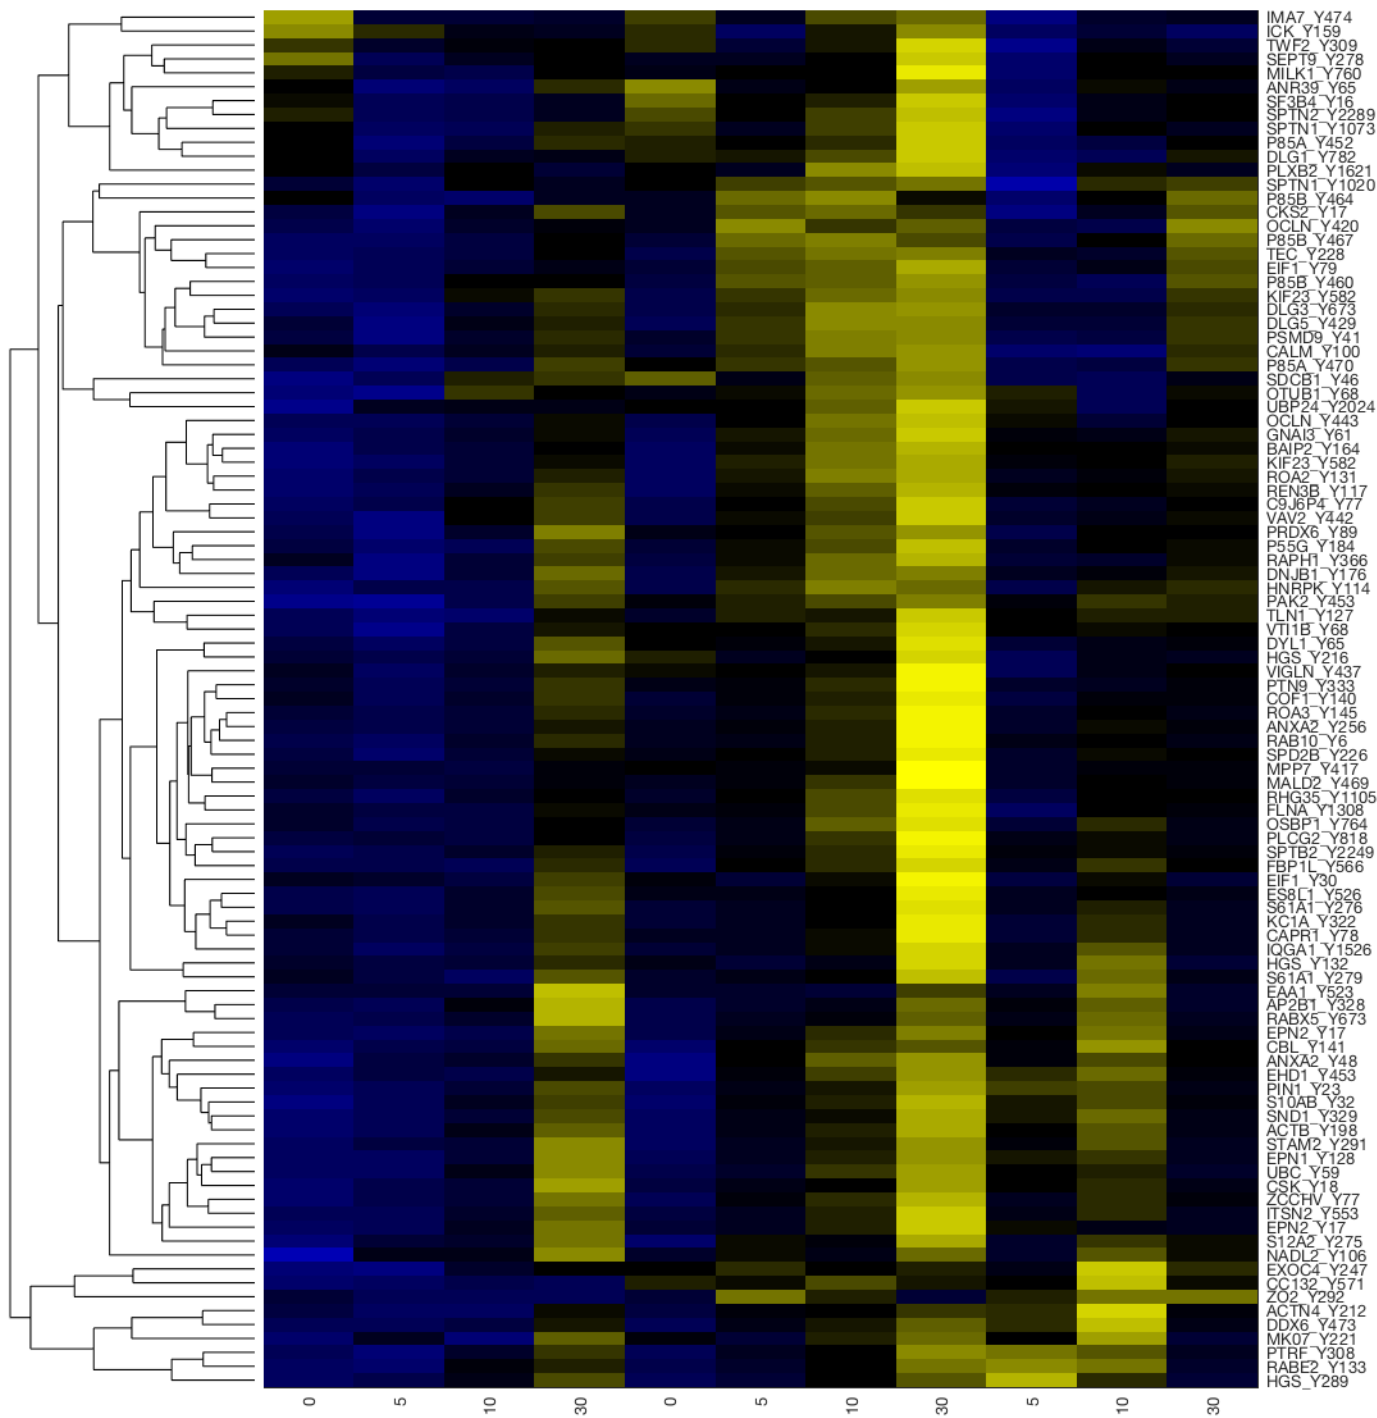

Supplement: supp [file elife-64251-supp-v1.zip › elife_poa_e64251_Figure_2_figure_supplement_1_source_data_3.pdf]

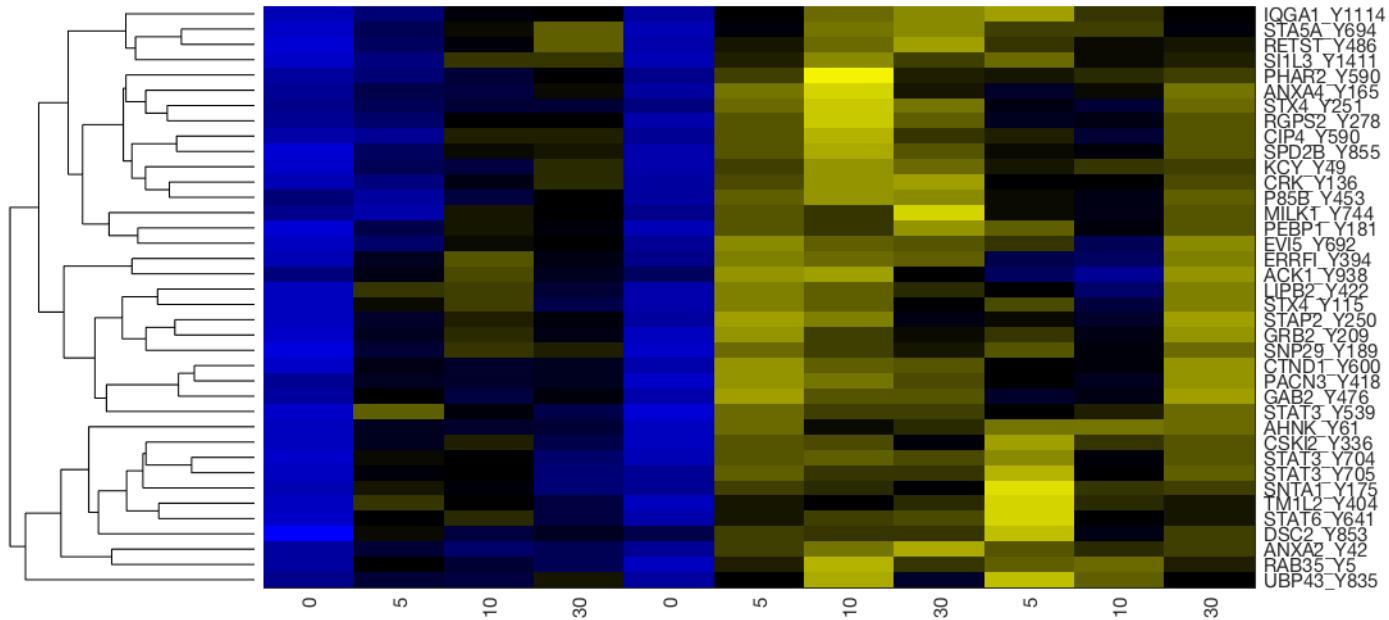

Supplement: supp [file elife-64251-supp-v1.zip › elife_poa_e64251_Figure_2_figure_supplement_1_source_data_4.pdf]

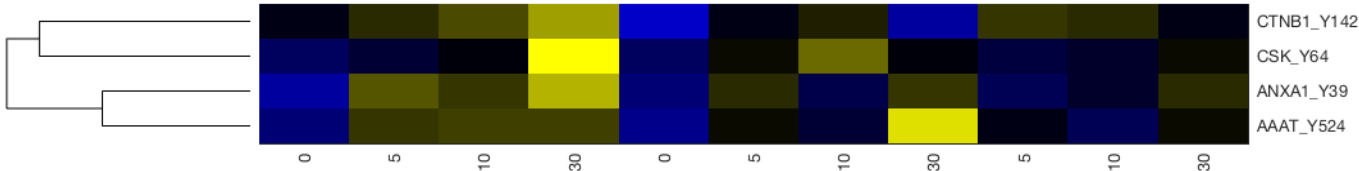

Supplement: supp [file elife-64251-supp-v1.zip › elife_poa_e64251_Figure_2_figure_supplement_1_source_data_5.pdf]

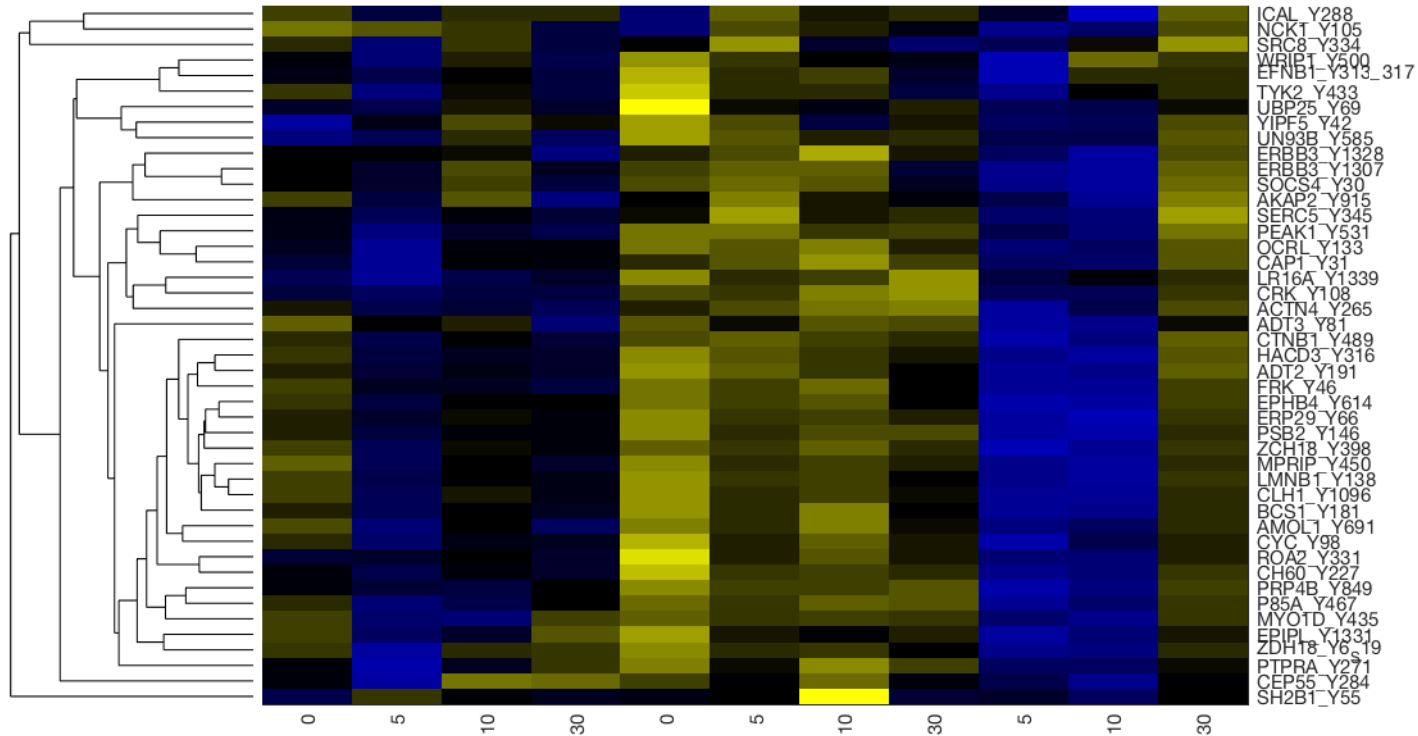

Supplement: supp [file elife-64251-supp-v1.zip › elife_poa_e64251_Figure_2_figure_supplement_1_source_data_6.pdf]

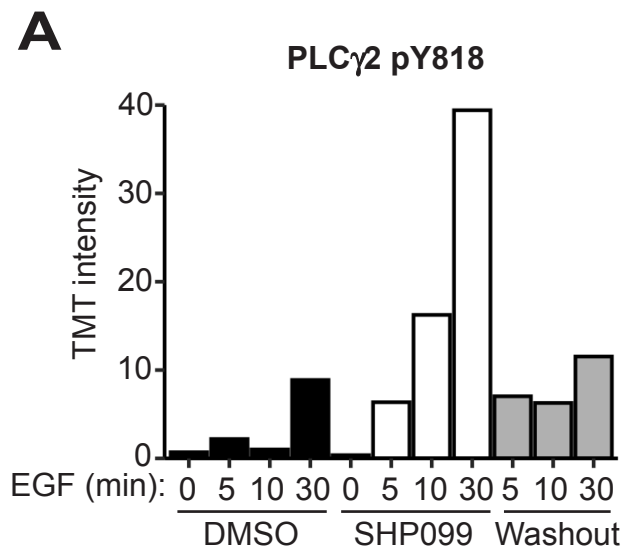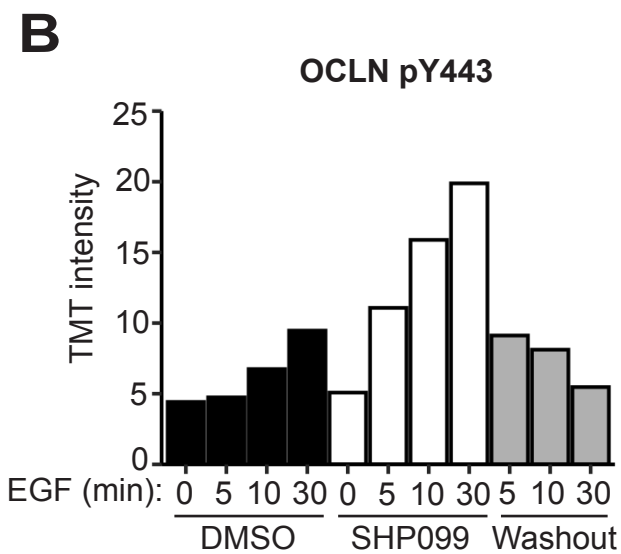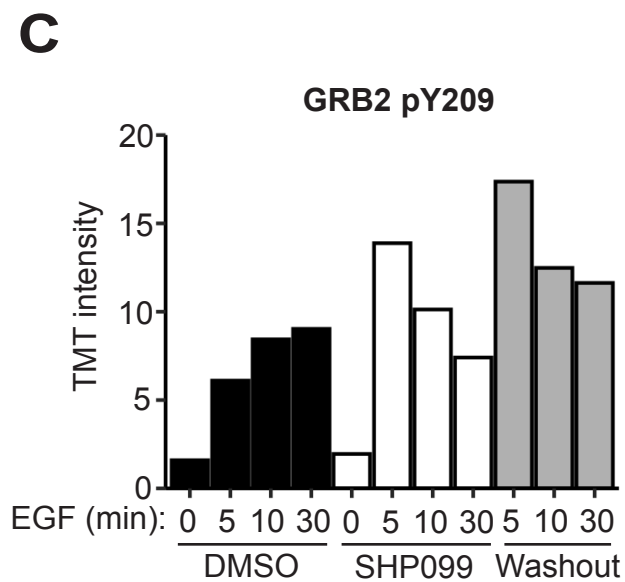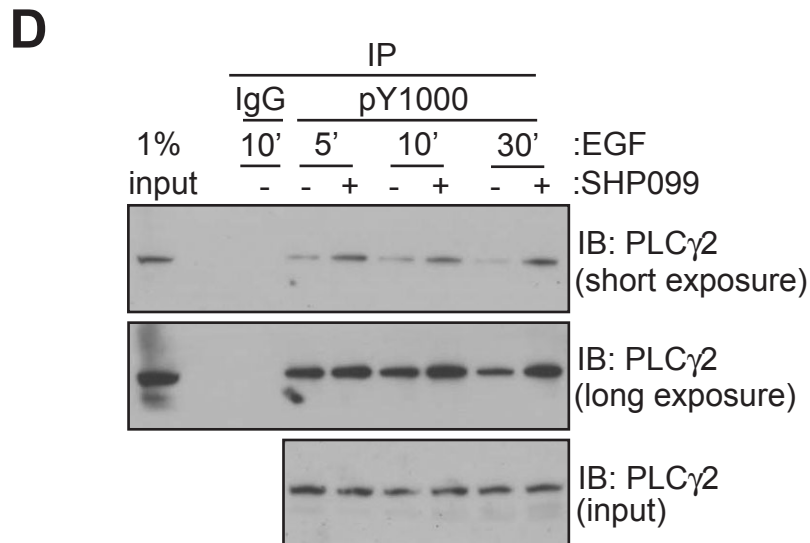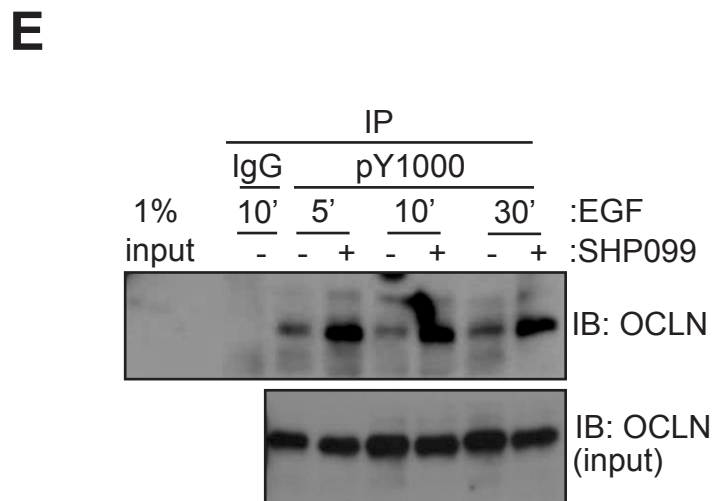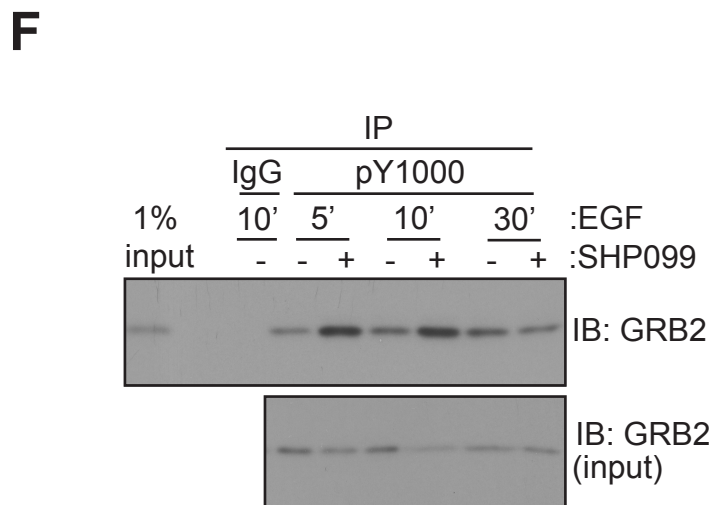

Figure 3-Figure supplement 1

Supplement: supp [file elife-64251-supp-v1.zip › elife_poa_e64251_Figure_3_figure_supplement_1.pdf]

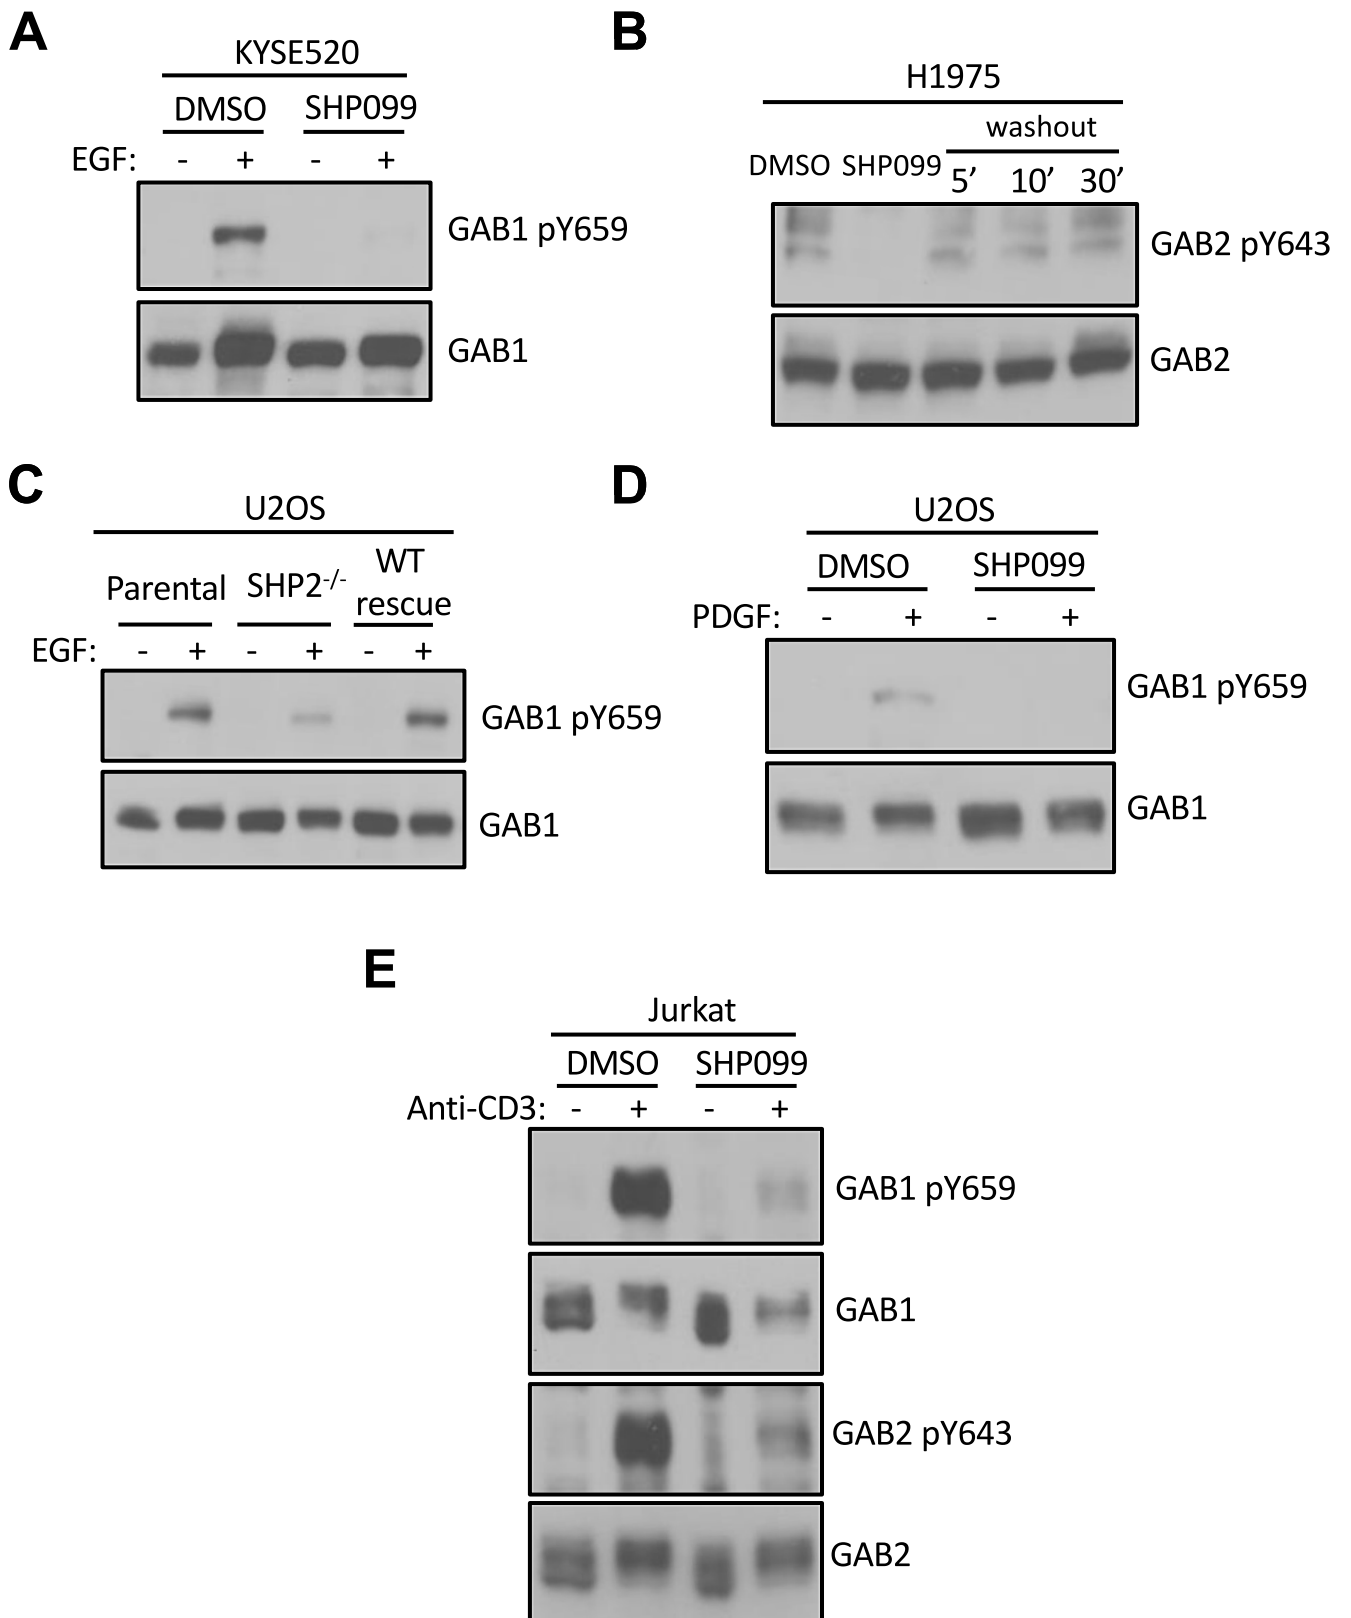

Figure 4-Figure supplement 1

Supplement: supp [file elife-64251-supp-v1.zip › elife_poa_e64251_Figure_4_figure_supplement_1.pdf]

**A**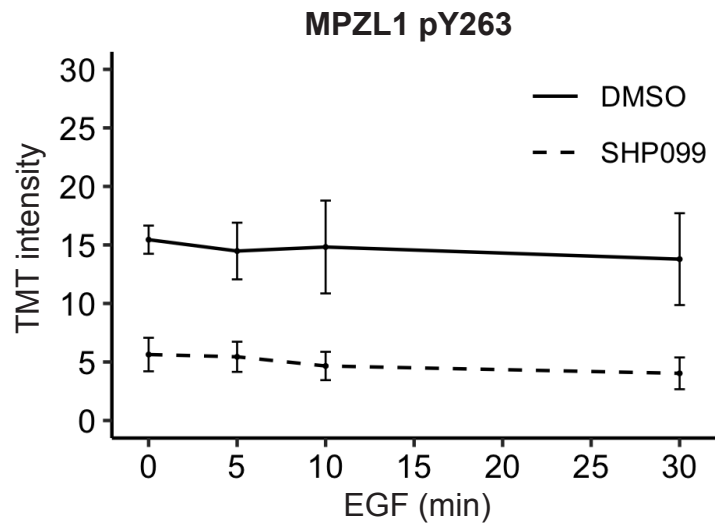**B**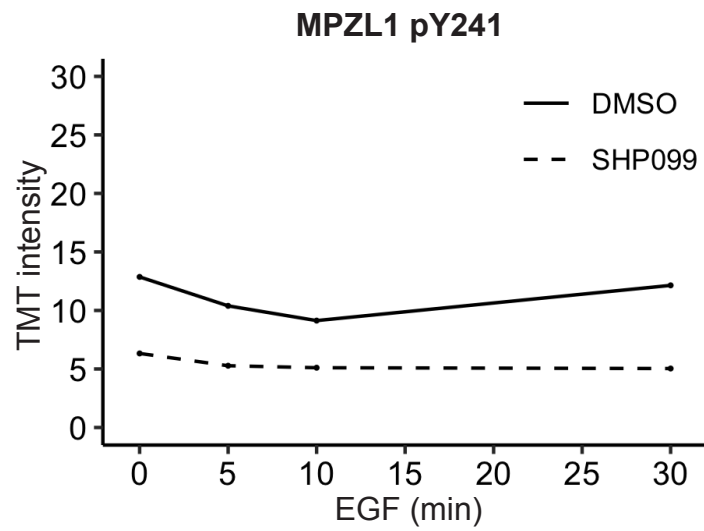**C**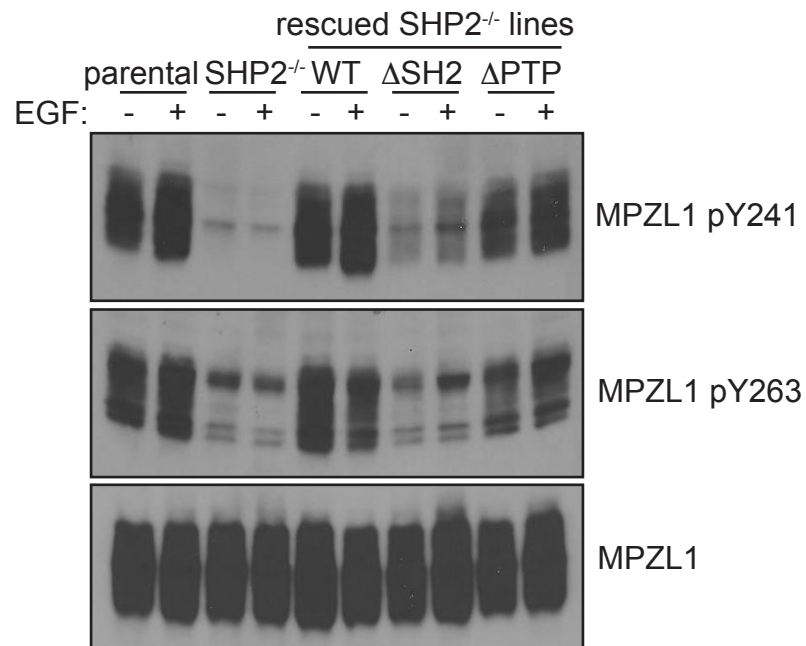

Figure 5-Figure supplement 1

Supplement: supp [file elife-64251-supp-v1.zip › elife_poa_e64251_Figure_5_figure_supplement_1.pdf]

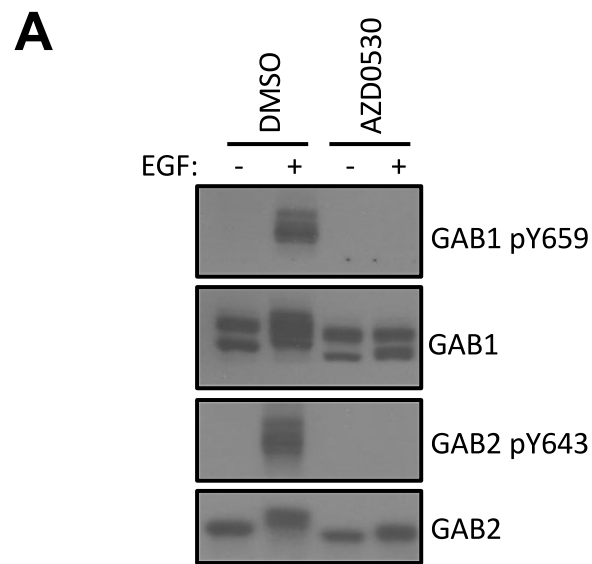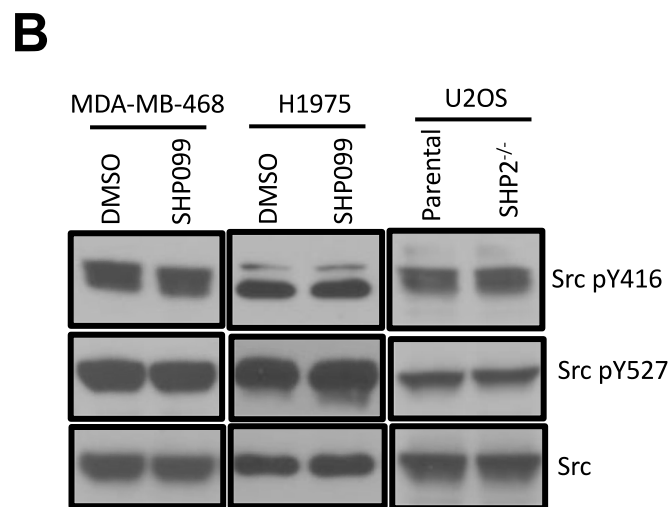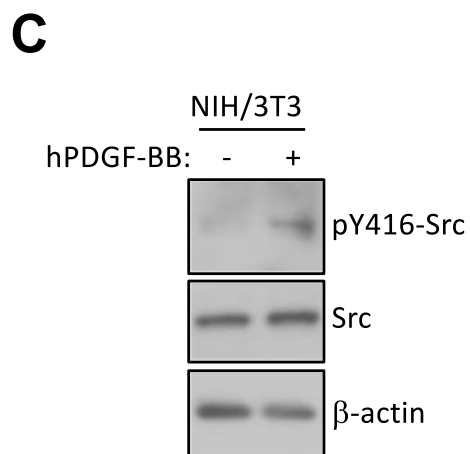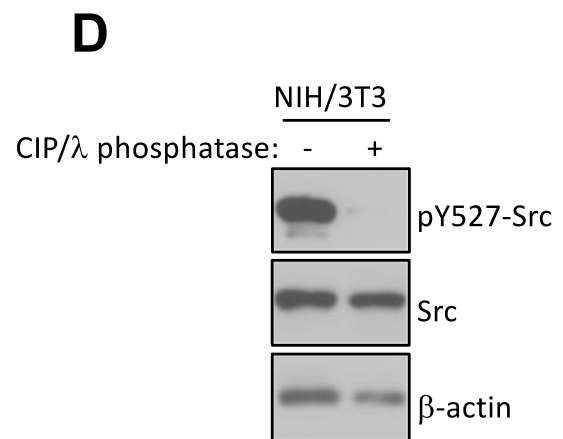

Figure 5-Figure supplement 2

Supplement: supp [file elife-64251-supp-v1.zip › elife_poa_e64251_Figure_5_figure_supplement_2.pdf]

**A**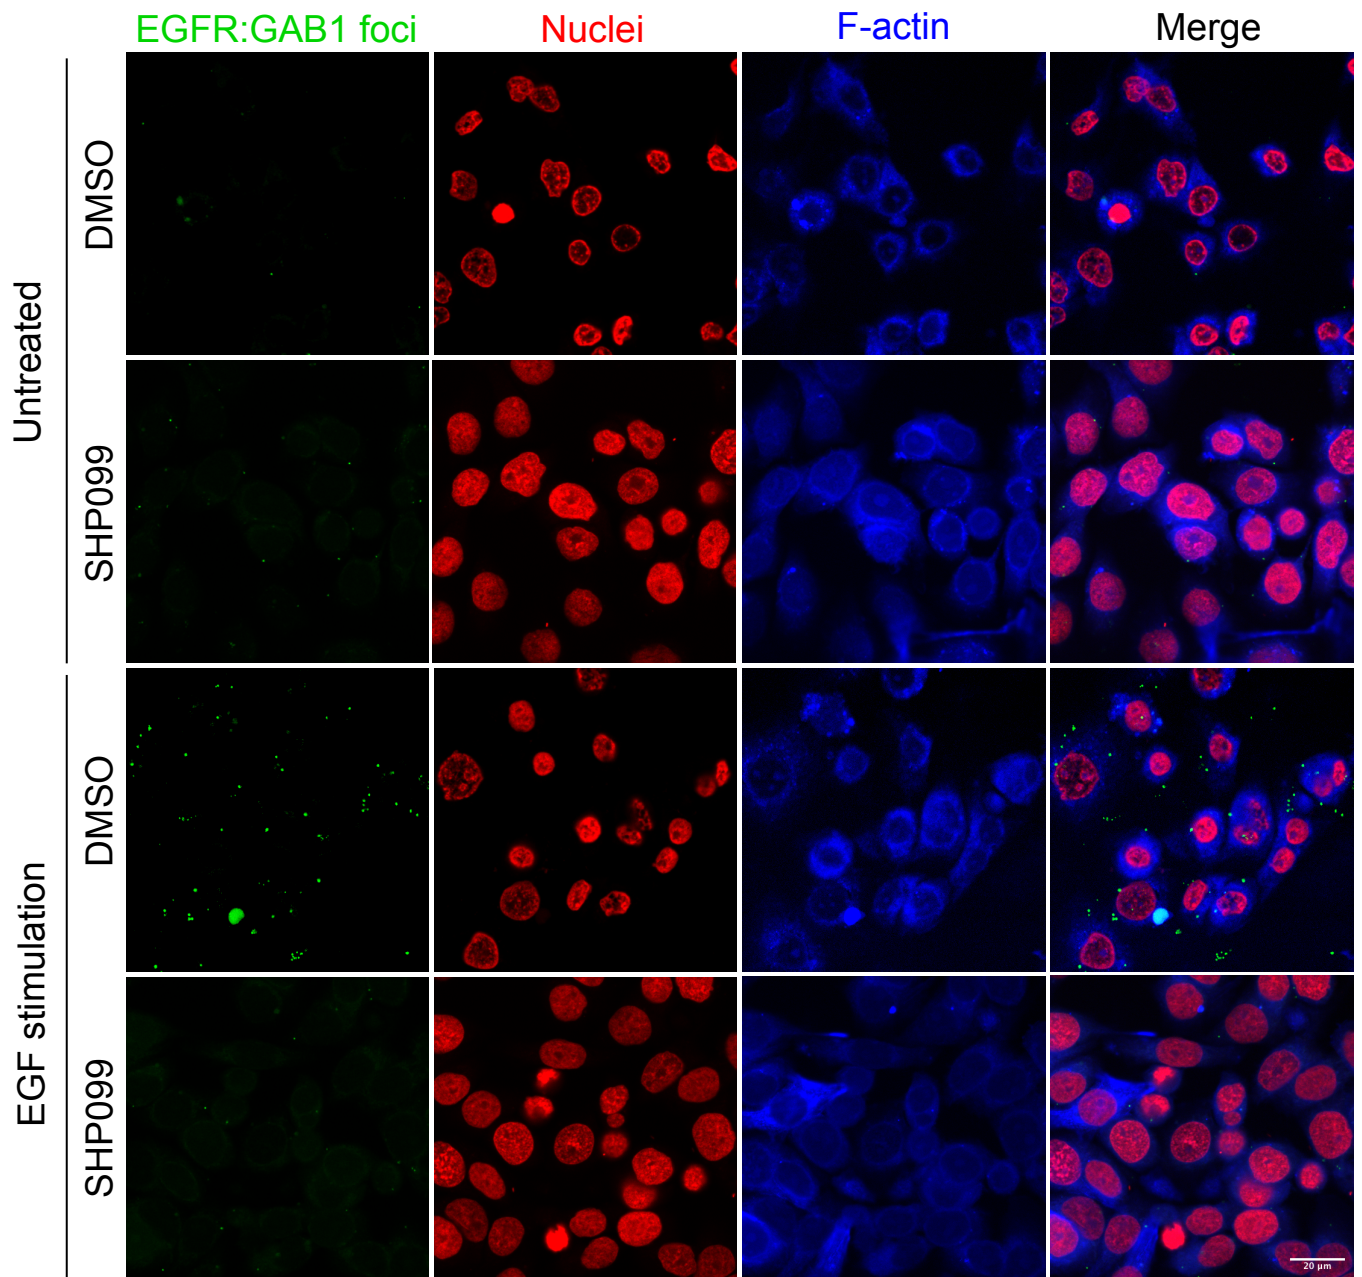**B**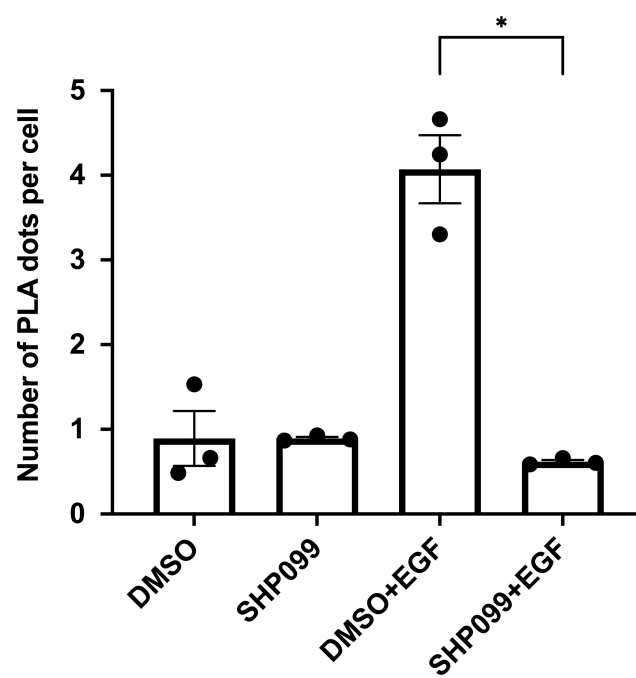

Figure 5-Figure supplement 3

Supplement: supp [file elife-64251-supp-v1.zip › elife_poa_e64251_Figure_5_figure_supplement_3.pdf]

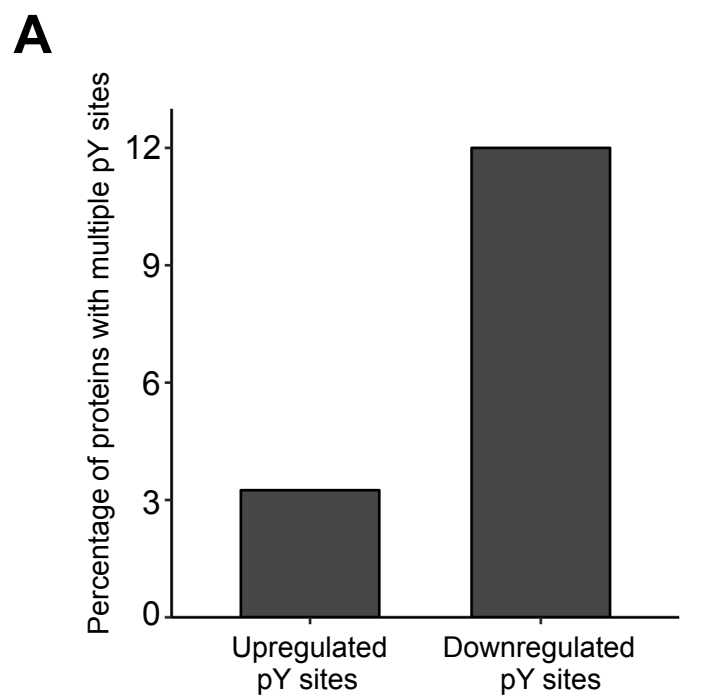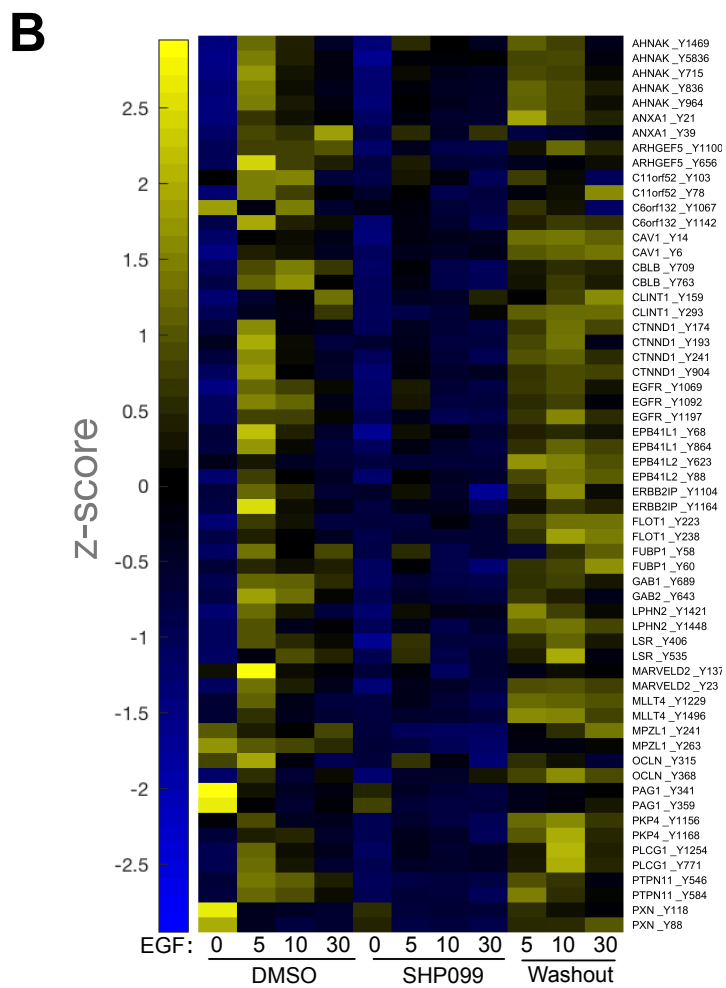

Figure 7-Figure supplement 1

Supplement: supp [file elife-64251-supp-v1.zip › elife_poa_e64251_Figure_7_figure_supplement_1.pdf]
